# Supplementary material for: Single nuclei RNA-seq of mouse placental labyrinth development
Source: eLife. 2020 Nov 3;9:e60266. doi: 10.7554/eLife.60266 (PMC7669270; doi:10.7554/eLife.60266)
Supplement: Figure 1—source data 1. [file elife-60266-fig1-data1.csv]

	p_val	avg_logFC	pct.1	pct.2	p_val_adj	cluster	gene
Glis1	0	2.90716545	0.993	0.215	0	0	Glis1
Dab1	0	2.250199862	0.918	0.116	0	0	Dab1
Caskin1	0	2.19368421	0.972	0.285	0	0	Caskin1
Snap91	0	2.099072531	0.959	0.223	0	0	Snap91
Stra6	0	2.032894524	0.937	0.143	0	0	Stra6
Plekha6	0	1.970556046	0.96	0.237	0	0	Plekha6
Iqgap2	0	1.927404186	0.935	0.27	0	0	Iqgap2
Ralgps1	0	1.909160044	0.89	0.178	0	0	Ralgps1
Tacc2	0	1.899676392	0.989	0.429	0	0	Tacc2
Rbm20	0	1.869365621	0.782	0.131	0	0	Rbm20
Kank1	0	1.783248944	0.975	0.367	0	0	Kank1
Mpp7	0	1.750025987	0.952	0.396	0	0	Mpp7
Arl15	0	1.736987652	0.972	0.755	0	0	Arl15
Iqsec1	0	1.729095027	0.965	0.483	0	0	Iqsec1
Mapre2	0	1.639983942	0.86	0.209	0	0	Mapre2
Zbtb7c	0	1.632269915	0.925	0.325	0	0	Zbtb7c
Psmd9	0	1.596974459	0.781	0.16	0	0	Psmd9
Car4	0	1.57478859	0.848	0.143	0	0	Car4
Echdc2	0	1.529734739	0.743	0.116	0	0	Echdc2
Med12l	0	1.52962955	0.853	0.279	0	0	Med12l
Pex5l	0	1.52703985	0.723	0.086	0	0	Pex5l
Prkcz	0	1.51753361	0.874	0.174	0	0	Prkcz
Hlcs	0	1.500020516	0.8	0.199	0	0	Hlcs
Kirrel3	0	1.482345548	0.608	0.066	0	0	Kirrel3
Cmtm4	0	1.480914298	0.915	0.264	0	0	Cmtm4
Epb41l4a	0	1.475215872	0.679	0.1	0	0	Epb41l4a
Thrb	0	1.475170344	0.663	0.094	0	0	Thrb
Tgfa	0	1.468851211	0.723	0.072	0	0	Tgfa
Cds1	0	1.452625229	0.769	0.109	0	0	Cds1
Lims2	0	1.439273836	0.77	0.119	0	0	Lims2
Slco4a1	0	1.438847885	0.74	0.094	0	0	Slco4a1
Slc22a23	0	1.438770145	0.88	0.224	0	0	Slc22a23
B230312C02Rik	0	1.436360507	0.646	0.047	0	0	B230312C02Rik
Mylk	0	1.433192712	0.722	0.124	0	0	Mylk
Tbc1d4	0	1.421820826	0.67	0.146	0	0	Tbc1d4
Ahcyl2	0	1.419027955	0.957	0.512	0	0	Ahcyl2
Osbp2	0	1.416764129	0.626	0.053	0	0	Osbp2
Sgms2	0	1.414589375	0.653	0.067	0	0	Sgms2
Akap13	0	1.402128922	0.979	0.588	0	0	Akap13
Lrp8	0	1.393611785	0.728	0.112	0	0	Lrp8
Arid1b	0	1.368035914	0.989	0.725	0	0	Arid1b
Mycbp2	0	1.357378915	0.98	0.689	0	0	Mycbp2
Dlg5	0	1.353223156	0.875	0.294	0	0	Dlg5
Shb	0	1.351242579	0.848	0.232	0	0	Shb
Dysf	0	1.34637821	0.946	0.374	0	0	Dysf
Plekha7	0	1.343392424	0.945	0.458	0	0	Plekha7
Amot	0	1.33434566	0.758	0.167	0	0	Amot
Tfrc	0	1.316465934	0.879	0.276	0	0	Tfrc
Ptpn13	0	1.316093467	0.818	0.214	0	0	Ptpn13
Ahnak	0	1.31278588	0.946	0.466	0	0	Ahnak
C2cd2	0	1.298522496	0.784	0.187	0	0	C2cd2
Sdk1	0	1.296450184	0.889	0.431	0	0	Sdk1
Kifc3	0	1.296231618	0.588	0.085	0	0	Kifc3
Itpk1	0	1.284852721	0.848	0.285	0	0	Itpk1
Gm28375	0	1.277121846	0.507	0.055	0	0	Gm28375
Mtus1	0	1.271159308	0.875	0.295	0	0	Mtus1
Uaca	0	1.265771912	0.898	0.317	0	0	Uaca
Plcg2	0	1.263290375	0.628	0.088	0	0	Plcg2
4-Sep	0	1.260848759	0.665	0.087	0	0	4-Sep
Dennd2a	0	1.251305632	0.916	0.437	0	0	Dennd2a
Batf3	0	1.244071395	0.609	0.066	0	0	Batf3
Tpcn1	0	1.222421439	0.713	0.142	0	0	Tpcn1
Bicdl1	0	1.210616891	0.777	0.205	0	0	Bicdl1
Chd3	0	1.210512386	0.663	0.133	0	0	Chd3
Ap2a2	0	1.200690307	0.896	0.354	0	0	Ap2a2
Ehbp1	0	1.19657337	0.964	0.624	0	0	Ehbp1
Tec	0	1.195344579	0.746	0.168	0	0	Tec
Lonrf3	0	1.194700033	0.638	0.088	0	0	Lonrf3
Wnk3	0	1.192258012	0.657	0.137	0	0	Wnk3
Ppfibp2	0	1.18966077	0.824	0.265	0	0	Ppfibp2
Atp11a	0	1.188396336	0.947	0.487	0	0	Atp11a
Sesn1	0	1.185469469	0.909	0.446	0	0	Sesn1
Agrn	0	1.176947828	0.558	0.104	0	0	Agrn
Vgll4	0	1.17168712	0.897	0.403	0	0	Vgll4
Tulp1	0	1.16405789	0.559	0.054	0	0	Tulp1
Clip1	0	1.155985122	0.739	0.211	0	0	Clip1
Samd4	0	1.155388338	0.74	0.24	0	0	Samd4
Atrnl1	0	1.147567519	0.952	0.616	0	0	Atrnl1
Bmper	0	1.146015778	0.503	0.079	0	0	Bmper
Baiap2l1	0	1.140680044	0.679	0.178	0	0	Baiap2l1
Slc41a2	0	1.1353599	0.636	0.128	0	0	Slc41a2
Lnx2	0	1.135188319	0.832	0.291	0	0	Lnx2
Prr5l	0	1.122264267	0.622	0.087	0	0	Prr5l
Rassf5	0	1.112568242	0.505	0.037	0	0	Rassf5
Rb1	0	1.112496058	0.748	0.213	0	0	Rb1
Kazn	0	1.108446149	0.898	0.362	0	0	Kazn
C2cd5	0	1.107627487	0.762	0.233	0	0	C2cd5
Ank	0	1.107480028	0.813	0.272	0	0	Ank
Ap1s3	0	1.10474144	0.669	0.165	0	0	Ap1s3
Slc12a7	0	1.099450148	0.713	0.186	0	0	Slc12a7
Ppfia1	0	1.086130426	0.835	0.335	0	0	Ppfia1
Sgk2	0	1.085210935	0.512	0.042	0	0	Sgk2
Plekhd1	0	1.078690969	0.475	0.021	0	0	Plekhd1
Arhgap26	0	1.07862722	0.674	0.293	0	0	Arhgap26
Helz	0	1.071817231	0.969	0.668	0	0	Helz
Stard8	0	1.070301211	0.609	0.11	0	0	Stard8
Eps8l2	0	1.060487172	0.91	0.419	0	0	Eps8l2
Tns1	0	1.058196305	0.944	0.498	0	0	Tns1
Plxnb1	0	1.054701227	0.704	0.183	0	0	Plxnb1
Eps8	0	1.052696809	0.84	0.368	0	0	Eps8
Sik3	0	1.050479131	0.945	0.544	0	0	Sik3
Slc38a1	0	1.05014747	0.982	0.659	0	0	Slc38a1
Jag2	0	1.049732252	0.499	0.048	0	0	Jag2
Cd9	0	1.049323949	0.798	0.293	0	0	Cd9
Exoc3l4	0	1.048499184	0.649	0.131	0	0	Exoc3l4
Kdm2b	0	1.041750313	0.748	0.253	0	0	Kdm2b
Abcd4	0	1.039079691	0.627	0.155	0	0	Abcd4
Gpr137b	0	1.035902314	0.563	0.093	0	0	Gpr137b
Ppp2r3a	0	1.029571073	0.932	0.523	0	0	Ppp2r3a
4932438A13Rik	0	1.027418453	0.871	0.447	0	0	4932438A13Rik
Kitl	0	1.026013935	0.813	0.319	0	0	Kitl
Gm13269	0	1.019347224	0.341	0.037	0	0	Gm13269
Rufy3	0	1.01767727	0.642	0.189	0	0	Rufy3
Acvr2b	0	1.012395188	0.704	0.205	0	0	Acvr2b
Osbpl3	0	1.008990733	0.645	0.18	0	0	Osbpl3
Dmxl2	0	1.008550592	0.735	0.249	0	0	Dmxl2
Rbms2	0	1.005848304	0.855	0.446	0	0	Rbms2
AC133498.1	0	1.003278119	0.424	0.049	0	0	AC133498.1
Ppip5k1	0	1.001280059	0.501	0.091	0	0	Ppip5k1
Flvcr2	0	0.991576206	0.549	0.092	0	0	Flvcr2
Rassf6	0	0.987236819	0.533	0.075	0	0	Rassf6
Wwc1	0	0.986290569	0.755	0.273	0	0	Wwc1
Clybl	0	0.982896709	0.785	0.38	0	0	Clybl
Esrp1	0	0.981094404	0.601	0.145	0	0	Esrp1
Msrb3	0	0.97999352	0.625	0.19	0	0	Msrb3
Fam129b	0	0.975523349	0.774	0.243	0	0	Fam129b
Slc1a1	0	0.970435816	0.398	0.027	0	0	Slc1a1
Rhpn2	0	0.961414852	0.476	0.051	0	0	Rhpn2
Ubr4	0	0.954073605	0.757	0.34	0	0	Ubr4
Fmnl2	0	0.953249864	0.718	0.325	0	0	Fmnl2
Maoa	0	0.949698939	0.562	0.11	0	0	Maoa
Trpm6	0	0.947834781	0.615	0.127	0	0	Trpm6
Zfyve26	0	0.946744459	0.619	0.182	0	0	Zfyve26
Tsga10	0	0.940247846	0.503	0.091	0	0	Tsga10
Stk40	0	0.940039114	0.542	0.116	0	0	Stk40
Stx6	0	0.939183694	0.618	0.167	0	0	Stx6
Ndrg1	0	0.933633318	0.677	0.187	0	0	Ndrg1
Arhgef6	0	0.925999852	0.874	0.409	0	0	Arhgef6
Leng8	0	0.925879494	0.754	0.319	0	0	Leng8
Kif16b	0	0.924211027	0.674	0.24	0	0	Kif16b
Folr1	0	0.923894907	0.467	0.05	0	0	Folr1
Lima1	0	0.921809604	0.939	0.581	0	0	Lima1
Spen	0	0.921584314	0.837	0.4	0	0	Spen
Carmil1	0	0.918884347	0.901	0.523	0	0	Carmil1
Lrch1	0	0.917827274	0.965	0.631	0	0	Lrch1
Sh3tc2	0	0.917503534	0.513	0.098	0	0	Sh3tc2
Dync1h1	0	0.910915502	0.837	0.445	0	0	Dync1h1
Maged1	0	0.910673942	0.738	0.263	0	0	Maged1
Arhgap44	0	0.90954992	0.545	0.119	0	0	Arhgap44
Ttll5	0	0.905214683	0.921	0.567	0	0	Ttll5
Plxna2	0	0.903021401	0.574	0.134	0	0	Plxna2
Prkce	0	0.902537358	0.906	0.561	0	0	Prkce
Macf1	0	0.90144006	0.992	0.902	0	0	Macf1
Las1l	0	0.89697921	0.742	0.29	0	0	Las1l
Epn1	0	0.895200766	0.663	0.221	0	0	Epn1
Kif13a	0	0.894557871	0.852	0.465	0	0	Kif13a
Pax2	0	0.89448237	0.34	0.017	0	0	Pax2
Usp48	0	0.891957764	0.828	0.388	0	0	Usp48
Rdm1	0	0.888612267	0.627	0.209	0	0	Rdm1
Foxn3	0	0.887972458	0.932	0.545	0	0	Foxn3
Atxn2	0	0.882964718	0.931	0.609	0	0	Atxn2
Tulp4	0	0.881702765	0.841	0.443	0	0	Tulp4
Plbd1	0	0.875223751	0.406	0.038	0	0	Plbd1
Arhgef3	0	0.867765998	0.845	0.413	0	0	Arhgef3
Tmem116	0	0.86686097	0.44	0.098	0	0	Tmem116
Rab11fip3	0	0.866501489	0.583	0.186	0	0	Rab11fip3
Polg	0	0.866472359	0.709	0.269	0	0	Polg
Eif4g1	0	0.86616461	0.927	0.594	0	0	Eif4g1
Lmo7	0	0.864633577	0.592	0.217	0	0	Lmo7
Sh3tc1	0	0.864486397	0.437	0.058	0	0	Sh3tc1
Fam234a	0	0.860367764	0.521	0.143	0	0	Fam234a
Dlgap4	0	0.856955155	0.776	0.345	0	0	Dlgap4
Sgk3	0	0.856505634	0.649	0.21	0	0	Sgk3
Mertk	0	0.85467814	0.582	0.157	0	0	Mertk
Mroh1	0	0.853877736	0.626	0.202	0	0	Mroh1
Stxbp6	0	0.850660878	0.433	0.076	0	0	Stxbp6
Ankrd6	0	0.847322297	0.489	0.135	0	0	Ankrd6
Wwtr1	0	0.845061494	0.899	0.526	0	0	Wwtr1
Wwc2	0	0.844232594	0.942	0.619	0	0	Wwc2
Myof	0	0.843277173	0.883	0.469	0	0	Myof
Tns4	0	0.84267916	0.37	0.032	0	0	Tns4
Pmepa1	0	0.842484326	0.496	0.112	0	0	Pmepa1
Bbx	0	0.841976097	0.98	0.767	0	0	Bbx
Mme	0	0.840707482	0.395	0.054	0	0	Mme
Etnk1	0	0.840309587	0.606	0.206	0	0	Etnk1
Atp6v0b	0	0.839914161	0.588	0.184	0	0	Atp6v0b
Lzts2	0	0.829012313	0.655	0.24	0	0	Lzts2
Foxo3	0	0.825653965	0.663	0.262	0	0	Foxo3
Tead3	0	0.825046497	0.504	0.111	0	0	Tead3
Arhgef16	0	0.816884426	0.484	0.096	0	0	Arhgef16
Cd320	0	0.815007119	0.398	0.053	0	0	Cd320
Fgd4	0	0.81117687	0.808	0.419	0	0	Fgd4
Anxa3	0	0.80759424	0.624	0.208	0	0	Anxa3
Lyst	0	0.806463583	0.607	0.213	0	0	Lyst
Ankrd12	0	0.803125123	0.801	0.407	0	0	Ankrd12
Aco1	0	0.802816744	0.516	0.133	0	0	Aco1
Dvl3	0	0.802638821	0.586	0.177	0	0	Dvl3
Slc16a9	0	0.801897555	0.41	0.056	0	0	Slc16a9
Senp3	0	0.800727755	0.523	0.131	0	0	Senp3
Mtmr10	0	0.798797692	0.478	0.111	0	0	Mtmr10
Zdbf2	0	0.796707325	0.47	0.121	0	0	Zdbf2
Slc35f2	0	0.796449609	0.393	0.059	0	0	Slc35f2
Enah	0	0.794118619	0.862	0.506	0	0	Enah
Fam90a1b	0	0.792098479	0.454	0.084	0	0	Fam90a1b
Dlx4os	0	0.790300176	0.331	0.017	0	0	Dlx4os
Plekha1	0	0.789954568	0.579	0.183	0	0	Plekha1
Lipg	0	0.785704639	0.399	0.059	0	0	Lipg
Pax8	0	0.784621277	0.313	0.02	0	0	Pax8
Rab24	0	0.783731116	0.575	0.203	0	0	Rab24
Optn	0	0.77983553	0.64	0.244	0	0	Optn
Ovol2	0	0.779796206	0.432	0.076	0	0	Ovol2
Cuedc1	0	0.779215938	0.641	0.238	0	0	Cuedc1
Atp6v0d1	0	0.779110054	0.613	0.228	0	0	Atp6v0d1
Asap3	0	0.779041018	0.637	0.199	0	0	Asap3
Tead1	0	0.777644589	0.937	0.541	0	0	Tead1
Kirrel	0	0.77495836	0.547	0.188	0	0	Kirrel
Nsf	0	0.773440536	0.775	0.408	0	0	Nsf
Wdfy3	0	0.773287142	0.948	0.686	0	0	Wdfy3
Psd4	0	0.771009426	0.595	0.189	0	0	Psd4
Nlk	0	0.770286005	0.868	0.549	0	0	Nlk
Ccdc162	0	0.769226658	0.409	0.073	0	0	Ccdc162
Sin3b	0	0.767804961	0.85	0.458	0	0	Sin3b
Slco2a1	0	0.763782682	0.627	0.177	0	0	Slco2a1
Stx3	0	0.763292752	0.537	0.18	0	0	Stx3
Frmpd1	0	0.761351857	0.64	0.227	0	0	Frmpd1
Tdrp	0	0.761303234	0.379	0.045	0	0	Tdrp
Steap3	0	0.761111304	0.326	0.033	0	0	Steap3
Traf3	0	0.758491204	0.693	0.317	0	0	Traf3
Arhgef18	0	0.753401425	0.64	0.264	0	0	Arhgef18
Kmt2c	0	0.75201343	0.901	0.644	0	0	Kmt2c
Atp6v0a1	0	0.74975134	0.659	0.24	0	0	Atp6v0a1
Tns3	0	0.748038211	0.746	0.33	0	0	Tns3
Llgl2	0	0.747969635	0.452	0.107	0	0	Llgl2
Pfdn1	0	0.745779524	0.553	0.185	0	0	Pfdn1
Zim1	0	0.744908027	0.591	0.215	0	0	Zim1
Agfg1	0	0.744214651	0.764	0.379	0	0	Agfg1
Zc3h12c	0	0.743214504	0.421	0.088	0	0	Zc3h12c
Parp4	0	0.737131222	0.819	0.436	0	0	Parp4
Abhd16a	0	0.734509559	0.456	0.104	0	0	Abhd16a
Fgfr2	0	0.73355781	0.834	0.502	0	0	Fgfr2
Ppp1r9a	0	0.733546519	0.854	0.464	0	0	Ppp1r9a
Usp31	0	0.73235495	0.531	0.161	0	0	Usp31
Srgap3	0	0.730130655	0.818	0.443	0	0	Srgap3
Ubtd1	0	0.727958727	0.543	0.207	0	0	Ubtd1
Parm1	0	0.726992	0.719	0.336	0	0	Parm1
Pid1	0	0.722542401	0.418	0.075	0	0	Pid1
Pex14	0	0.722474498	0.947	0.65	0	0	Pex14
Arhgef10l	0	0.721281319	0.407	0.096	0	0	Arhgef10l
Tpd52	0	0.718565055	0.654	0.273	0	0	Tpd52
Camk2d	0	0.718438463	0.85	0.506	0	0	Camk2d
Chst8	0	0.713559091	0.289	0.029	0	0	Chst8
Shtn1	0	0.712277455	0.532	0.177	0	0	Shtn1
Reps2	0	0.711680104	0.48	0.124	0	0	Reps2
Slc4a4	0	0.710841668	0.389	0.07	0	0	Slc4a4
Epn2	0	0.709491544	0.613	0.254	0	0	Epn2
Prr12	0	0.709248607	0.43	0.106	0	0	Prr12
D10Wsu102e	0	0.708763789	0.669	0.313	0	0	D10Wsu102e
Cryl1	0	0.707268114	0.414	0.113	0	0	Cryl1
Rnf128	0	0.705544492	0.734	0.325	0	0	Rnf128
Mfn1	0	0.704115821	0.487	0.143	0	0	Mfn1
Slc7a7	0	0.703268543	0.447	0.112	0	0	Slc7a7
Pepd	0	0.701263246	0.538	0.196	0	0	Pepd
Csf1r	0	0.700670032	0.498	0.136	0	0	Csf1r
Gjb2	0	0.70060046	0.386	0.073	0	0	Gjb2
Slc11a2	0	0.700367739	0.376	0.062	0	0	Slc11a2
Mtor	0	0.698312319	0.634	0.278	0	0	Mtor
Arhgef37	0	0.697911241	0.311	0.039	0	0	Arhgef37
Pard3	0	0.694725407	0.984	0.841	0	0	Pard3
Snx8	0	0.694038245	0.411	0.1	0	0	Snx8
Cbx7	0	0.693008379	0.873	0.552	0	0	Cbx7
Kif13b	0	0.692830568	0.804	0.418	0	0	Kif13b
Jazf1	0	0.692223946	0.882	0.555	0	0	Jazf1
Tnk2	0	0.689454735	0.587	0.228	0	0	Tnk2
Arhgap10	0	0.688655698	0.996	0.878	0	0	Arhgap10
Slc6a6	0	0.688140106	0.771	0.388	0	0	Slc6a6
Slc16a1	0	0.687845396	0.463	0.14	0	0	Slc16a1
Vps8	0	0.684469967	0.58	0.254	0	0	Vps8
Patj	0	0.684341014	0.82	0.461	0	0	Patj
Svil	0	0.679693667	0.728	0.381	0	0	Svil
Pard6b	0	0.679220649	0.33	0.039	0	0	Pard6b
Zfand3	0	0.677198307	0.98	0.87	0	0	Zfand3
Hbegf	0	0.676620417	0.349	0.053	0	0	Hbegf
Lamb2	0	0.672547083	0.389	0.083	0	0	Lamb2
Ass1	0	0.664050303	0.36	0.073	0	0	Ass1
Eml2	0	0.660669354	0.422	0.117	0	0	Eml2
Macrod1	0	0.66040739	0.276	0.037	0	0	Macrod1
Smurf1	0	0.658563482	0.741	0.386	0	0	Smurf1
Fam105a	0	0.656622335	0.273	0.026	0	0	Fam105a
Bclaf3	0	0.656465238	0.811	0.452	0	0	Bclaf3
Stxbp2	0	0.652849342	0.421	0.117	0	0	Stxbp2
Atxn10	0	0.652643377	0.977	0.794	0	0	Atxn10
Srsf1	0	0.651738775	0.541	0.22	0	0	Srsf1
Slc22a18	0	0.651156366	0.33	0.059	0	0	Slc22a18
Cnn3	0	0.64999482	0.53	0.182	0	0	Cnn3
Epb41	0	0.64957407	0.873	0.557	0	0	Epb41
Fam107b	0	0.649399952	0.556	0.197	0	0	Fam107b
Ankrd44	0	0.648287731	0.672	0.262	0	0	Ankrd44
Smg1	0	0.647455971	0.905	0.67	0	0	Smg1
Slc26a7	0	0.646794033	0.285	0.025	0	0	Slc26a7
Tfeb	0	0.645452566	0.44	0.124	0	0	Tfeb
Snx30	0	0.64345488	0.549	0.23	0	0	Snx30
Mirt1	0	0.640700936	0.272	0.02	0	0	Mirt1
Plat	0	0.639864126	0.288	0.03	0	0	Plat
Ctnna1	0	0.638348821	0.927	0.702	0	0	Ctnna1
Atp13a3	0	0.638195638	0.749	0.418	0	0	Atp13a3
Kif5a	0	0.634681477	0.293	0.036	0	0	Kif5a
Nisch	0	0.633568402	0.83	0.56	0	0	Nisch
Anxa5	0	0.630939304	0.565	0.215	0	0	Anxa5
Lgmn	0	0.629074821	0.449	0.134	0	0	Lgmn
Khnyn	0	0.627227504	0.533	0.207	0	0	Khnyn
Mbnl3	0	0.626129671	0.867	0.539	0	0	Mbnl3
Syngr1	0	0.624448307	0.352	0.08	0	0	Syngr1
Klc1	0	0.622828203	0.709	0.349	0	0	Klc1
Peg3	0	0.622396299	0.971	0.789	0	0	Peg3
Wnk4	0	0.62166292	0.267	0.024	0	0	Wnk4
Lgals8	0	0.619619048	0.393	0.11	0	0	Lgals8
Daam1	0	0.618736538	0.872	0.566	0	0	Daam1
Sema4b	0	0.614313979	0.333	0.064	0	0	Sema4b
Slc22a4	0	0.613477899	0.329	0.064	0	0	Slc22a4
Osbpl2	0	0.610962383	0.437	0.141	0	0	Osbpl2
Whamm	0	0.610097791	0.377	0.108	0	0	Whamm
Huwe1	0	0.609202332	0.907	0.665	0	0	Huwe1
Dnajb6	0	0.60915424	0.793	0.469	0	0	Dnajb6
Folr2	0	0.608696319	0.265	0.021	0	0	Folr2
Abcc1	0	0.606672291	0.486	0.173	0	0	Abcc1
Sorbs3	0	0.605745701	0.315	0.065	0	0	Sorbs3
Cux1	0	0.602346654	0.968	0.74	0	0	Cux1
Ifnlr1	0	0.60220755	0.258	0.031	0	0	Ifnlr1
Renbp	0	0.601248728	0.363	0.091	0	0	Renbp
Pdlim1	0	0.595414462	0.765	0.405	0	0	Pdlim1
Sh3d21	0	0.592504632	0.271	0.029	0	0	Sh3d21
Epha4	0	0.586833132	0.412	0.106	0	0	Epha4
Mark3	0	0.58454697	0.89	0.628	0	0	Mark3
Hook2	0	0.581355084	0.403	0.125	0	0	Hook2
Smtn	0	0.580236153	0.408	0.13	0	0	Smtn
Tmcc3	0	0.579817556	0.821	0.406	0	0	Tmcc3
Uevld	0	0.579779804	0.482	0.177	0	0	Uevld
Agfg2	0	0.578154277	0.447	0.147	0	0	Agfg2
Slc39a13	0	0.575989415	0.314	0.074	0	0	Slc39a13
Phyhipl	0	0.574735965	0.257	0.032	0	0	Phyhipl
Nrcam	0	0.574407262	0.294	0.047	0	0	Nrcam
Bst2	0	0.56970217	0.329	0.068	0	0	Bst2
Dlx3	0	0.567198583	0.267	0.035	0	0	Dlx3
Wipi2	0	0.567001437	0.439	0.151	0	0	Wipi2
Asap2	0	0.566591652	0.496	0.18	0	0	Asap2
Aebp1	0	0.566190437	0.251	0.043	0	0	Aebp1
Naga	0	0.564613458	0.289	0.052	0	0	Naga
Rab11fip4	0	0.56412023	0.254	0.02	0	0	Rab11fip4
Flcn	0	0.559267861	0.304	0.075	0	0	Flcn
Sdc4	0	0.557506359	0.264	0.035	0	0	Sdc4
Plagl1	0	0.543762231	0.714	0.291	0	0	Plagl1
Ripor3	0	0.539547248	0.303	0.063	0	0	Ripor3
Dennd4a	0	0.532365777	0.485	0.176	0	0	Dennd4a
Zdhhc1	0	0.523126297	0.28	0.065	0	0	Zdhhc1
Pdgfb	0	0.522764134	0.305	0.062	0	0	Pdgfb
Pxmp4	0	0.521913086	0.275	0.062	0	0	Pxmp4
Tmem150a	0	0.511971307	0.618	0.19	0	0	Tmem150a
Rflnb	0	0.492698612	0.287	0.063	0	0	Rflnb
AU018091	0	0.490104726	0.263	0.053	0	0	AU018091
Fabp3	0	0.478333718	0.28	0.063	0	0	Fabp3
Tbc1d24	0	0.476850055	0.26	0.055	0	0	Tbc1d24
Neat1	0	0.437268572	0.938	0.59	0	0	Neat1
Git2	4.38E-307	0.572553102	0.84	0.531	9.41E-303	0	Git2
Ddr1	2.42E-305	0.616872756	0.454	0.165	5.21E-301	0	Ddr1
Srr	3.42E-305	0.580301945	0.508	0.199	7.36E-301	0	Srr
Utrn	9.83E-303	0.579480139	0.907	0.758	2.12E-298	0	Utrn
Srrm2	3.25E-302	0.571723765	0.934	0.802	7.00E-298	0	Srrm2
Slc4a2	3.24E-301	0.510320565	0.532	0.212	6.96E-297	0	Slc4a2
Ctsa	9.41E-300	0.588523957	0.427	0.148	2.02E-295	0	Ctsa
Ubr5	9.72E-300	0.569827585	0.848	0.606	2.09E-295	0	Ubr5
Fam214a	1.31E-299	0.584165179	0.606	0.272	2.83E-295	0	Fam214a
Zbtb16	1.75E-298	0.696301064	0.391	0.127	3.77E-294	0	Zbtb16
Adam19	4.73E-298	0.474613401	0.746	0.374	1.02E-293	0	Adam19
Nabp1	1.61E-293	0.555775171	0.468	0.174	3.46E-289	0	Nabp1
Bsg	1.83E-293	0.529495341	0.442	0.156	3.94E-289	0	Bsg
Cmtm7	7.36E-293	0.487541312	0.34	0.097	1.58E-288	0	Cmtm7
Mov10	1.68E-292	0.578154435	0.432	0.153	3.61E-288	0	Mov10
Nhs	1.79E-289	0.411636156	0.849	0.514	3.86E-285	0	Nhs
St3gal6	2.28E-286	0.498078639	0.376	0.119	4.91E-282	0	St3gal6
Fndc3b	1.35E-285	0.255197226	0.994	0.899	2.90E-281	0	Fndc3b
Rab12	3.47E-284	0.57713099	0.515	0.214	7.47E-280	0	Rab12
Dpf3	6.18E-282	0.608336436	0.77	0.449	1.33E-277	0	Dpf3
Gkap1	3.06E-280	0.642239529	0.658	0.338	6.59E-276	0	Gkap1
Anxa4	1.59E-279	0.42473711	0.858	0.511	3.42E-275	0	Anxa4
Ipmk	1.60E-278	0.56062275	0.368	0.121	3.43E-274	0	Ipmk
Slc39a10	1.75E-277	0.515748668	0.395	0.134	3.75E-273	0	Slc39a10
Prkci	5.64E-275	0.512120347	0.436	0.161	1.21E-270	0	Prkci
Acadm	8.74E-275	0.520301095	0.421	0.149	1.88E-270	0	Acadm
Psap	9.72E-275	0.563338206	0.686	0.363	2.09E-270	0	Psap
Suclg2	9.96E-273	0.600068375	0.694	0.369	2.14E-268	0	Suclg2
Slc2a1	1.49E-272	0.576688065	0.645	0.313	3.20E-268	0	Slc2a1
Snx9	1.24E-268	0.525713899	0.868	0.592	2.68E-264	0	Snx9
Mfge8	1.75E-267	0.440809108	0.274	0.071	3.77E-263	0	Mfge8
Afap1	2.78E-265	0.519600049	0.817	0.495	5.99E-261	0	Afap1
Stat1	1.39E-264	0.515997402	0.386	0.134	2.99E-260	0	Stat1
Dsp	3.69E-264	0.546790508	0.675	0.34	7.95E-260	0	Dsp
Mtmr4	2.15E-263	0.498750962	0.358	0.118	4.63E-259	0	Mtmr4
Usp29	1.70E-262	0.581037781	0.57	0.259	3.65E-258	0	Usp29
Prrg2	4.32E-262	0.441678622	0.252	0.063	9.30E-258	0	Prrg2
Itga5	4.81E-262	0.545626065	0.553	0.249	1.03E-257	0	Itga5
Zdhhc14	3.11E-261	0.475595511	0.718	0.372	6.69E-257	0	Zdhhc14
Mob3c	4.87E-261	0.435161028	0.267	0.07	1.05E-256	0	Mob3c
Limk2	4.28E-257	0.55265664	0.748	0.443	9.22E-253	0	Limk2
Dhx40	5.04E-256	0.498038972	0.361	0.121	1.08E-251	0	Dhx40
Ltv1	3.93E-255	0.436976332	0.271	0.072	8.45E-251	0	Ltv1
Frs2	4.92E-255	0.509097621	0.716	0.402	1.06E-250	0	Frs2
Ncoa7	2.20E-254	0.588203931	0.526	0.235	4.73E-250	0	Ncoa7
Serpine2	3.57E-254	0.565761547	0.479	0.194	7.69E-250	0	Serpine2
Wipf2	6.31E-253	0.616950115	0.48	0.202	1.36E-248	0	Wipf2
Vmp1	5.49E-252	0.55247004	0.724	0.425	1.18E-247	0	Vmp1
Peg10	1.07E-251	0.534996336	0.823	0.537	2.29E-247	0	Peg10
Fbxl20	4.76E-251	0.560006991	0.513	0.227	1.02E-246	0	Fbxl20
Myo1b	6.37E-251	0.50075929	0.813	0.504	1.37E-246	0	Myo1b
Hs6st1	7.35E-251	0.457229328	0.276	0.076	1.58E-246	0	Hs6st1
Xlr4b	1.72E-249	0.501642156	0.3	0.09	3.69E-245	0	Xlr4b
Cyth1	2.90E-249	0.538020259	0.505	0.217	6.25E-245	0	Cyth1
Smarca2	3.64E-248	0.472372136	0.607	0.289	7.83E-244	0	Smarca2
Tinagl1	1.55E-246	0.447277081	0.371	0.126	3.34E-242	0	Tinagl1
Clcn5	1.66E-246	0.563380439	0.486	0.208	3.56E-242	0	Clcn5
Fhdc1	2.09E-246	0.469962925	0.337	0.109	4.50E-242	0	Fhdc1
Strada	2.02E-245	0.50211984	0.407	0.154	4.34E-241	0	Strada
Fbxl19	4.33E-245	0.516665186	0.571	0.266	9.31E-241	0	Fbxl19
Atg4c	4.18E-244	0.531016217	0.375	0.135	9.00E-240	0	Atg4c
Osbpl9	1.09E-243	0.528599314	0.698	0.393	2.35E-239	0	Osbpl9
Pard6g	1.76E-243	0.488623126	0.691	0.351	3.80E-239	0	Pard6g
5031425E22Rik	3.48E-241	0.547853235	0.766	0.504	7.48E-237	0	5031425E22Rik
Dhrs3	1.13E-240	0.479992155	0.319	0.103	2.44E-236	0	Dhrs3
Krt7	1.48E-240	0.471512121	0.328	0.107	3.19E-236	0	Krt7
Arhgap32	2.30E-240	0.460560481	0.414	0.153	4.95E-236	0	Arhgap32
Plekhh1	4.66E-239	0.521462026	0.577	0.27	1.00E-234	0	Plekhh1
Ubac2	1.53E-238	0.562024258	0.677	0.382	3.30E-234	0	Ubac2
Slc7a5	1.55E-238	0.441991499	0.295	0.088	3.35E-234	0	Slc7a5
Bag6	4.08E-236	0.46118335	0.27	0.078	8.78E-232	0	Bag6
Oxct1	9.08E-235	0.546684721	0.44	0.179	1.95E-230	0	Oxct1
Ankrd13a	6.07E-234	0.508483097	0.645	0.332	1.31E-229	0	Ankrd13a
Golgb1	7.41E-234	0.548071671	0.768	0.484	1.60E-229	0	Golgb1
Itsn1	3.29E-232	0.517305399	0.625	0.326	7.08E-228	0	Itsn1
Dnase1l1	1.09E-231	0.463680791	0.278	0.083	2.34E-227	0	Dnase1l1
Cdk5	1.59E-231	0.420558325	0.279	0.082	3.42E-227	0	Cdk5
Cep170b	4.05E-231	0.417922747	0.252	0.068	8.71E-227	0	Cep170b
D5Ertd579e	9.71E-231	0.557560252	0.745	0.461	2.09E-226	0	D5Ertd579e
Hadh	2.32E-230	0.446694968	0.283	0.085	4.99E-226	0	Hadh
Cystm1	3.70E-230	0.514682241	0.483	0.212	7.95E-226	0	Cystm1
Lonp2	3.85E-230	0.511376948	0.784	0.51	8.29E-226	0	Lonp2
Micu1	5.08E-230	0.536850672	0.645	0.348	1.09E-225	0	Micu1
Fhod1	8.40E-229	0.45971212	0.362	0.128	1.81E-224	0	Fhod1
Tgm2	3.84E-228	0.457782825	0.411	0.157	8.25E-224	0	Tgm2
Ppp1r37	2.47E-227	0.503999364	0.461	0.195	5.32E-223	0	Ppp1r37
Flnb	7.74E-227	0.355262132	0.97	0.82	1.67E-222	0	Flnb
Grb10	1.34E-226	0.471091234	0.777	0.494	2.88E-222	0	Grb10
Eif2ak3	6.34E-226	0.513272651	0.485	0.213	1.36E-221	0	Eif2ak3
Zfp710	2.34E-225	0.497265932	0.467	0.197	5.03E-221	0	Zfp710
Purg	1.06E-224	0.44313355	0.29	0.09	2.29E-220	0	Purg
Kdm5c	2.59E-224	0.514096776	0.697	0.406	5.58E-220	0	Kdm5c
Afap1l1	2.65E-224	0.405319114	0.365	0.126	5.71E-220	0	Afap1l1
Mark1	5.36E-224	0.421201975	0.281	0.084	1.15E-219	0	Mark1
Myo5b	2.84E-223	0.484900559	0.389	0.146	6.11E-219	0	Myo5b
Crebrf	2.85E-223	0.4834682	0.414	0.165	6.14E-219	0	Crebrf
Smyd3	3.00E-223	0.526987913	0.828	0.568	6.45E-219	0	Smyd3
St5	7.95E-223	0.532170359	0.677	0.392	1.71E-218	0	St5
Spg11	9.87E-223	0.485846419	0.416	0.167	2.12E-218	0	Spg11
Bin2	4.16E-222	0.492389959	0.369	0.136	8.95E-218	0	Bin2
Dennd1a	6.71E-222	0.400071853	0.954	0.852	1.44E-217	0	Dennd1a
Ppargc1b	8.81E-222	0.47519234	0.415	0.161	1.90E-217	0	Ppargc1b
Rnf214	1.93E-221	0.515786512	0.502	0.23	4.15E-217	0	Rnf214
Prrc2a	1.02E-220	0.52212722	0.593	0.304	2.19E-216	0	Prrc2a
Tbc1d14	1.15E-219	0.481822174	0.34	0.12	2.48E-215	0	Tbc1d14
Idh2	1.29E-219	0.438636551	0.315	0.104	2.77E-215	0	Idh2
Tmbim1	6.83E-219	0.437835739	0.298	0.096	1.47E-214	0	Tmbim1
Tmc4	9.32E-219	0.461081085	0.368	0.135	2.01E-214	0	Tmc4
Map3k5	1.50E-218	0.488956985	0.413	0.165	3.23E-214	0	Map3k5
Arap2	4.43E-218	0.505140967	0.579	0.291	9.52E-214	0	Arap2
Adnp2	6.88E-218	0.445874363	0.327	0.113	1.48E-213	0	Adnp2
Irak2	1.39E-217	0.494678655	0.418	0.171	2.99E-213	0	Irak2
Stim1	5.30E-217	0.539490315	0.618	0.339	1.14E-212	0	Stim1
Cdkn1c	1.34E-216	0.528836477	0.68	0.38	2.89E-212	0	Cdkn1c
Tnrc18	1.31E-215	0.483381439	0.767	0.477	2.81E-211	0	Tnrc18
2010111I01Rik	3.79E-214	0.445880714	0.768	0.478	8.16E-210	0	2010111I01Rik
Ckb	6.33E-214	0.443561827	0.291	0.094	1.36E-209	0	Ckb
Brap	3.22E-212	0.463756869	0.357	0.133	6.93E-208	0	Brap
Slc45a4	5.64E-211	0.418265386	0.391	0.149	1.21E-206	0	Slc45a4
Inppl1	1.66E-210	0.436508521	0.33	0.116	3.58E-206	0	Inppl1
Myl6	3.53E-210	0.493142438	0.427	0.18	7.59E-206	0	Myl6
Snx27	6.96E-210	0.515980526	0.621	0.34	1.50E-205	0	Snx27
Slc23a2	5.91E-208	0.471439326	0.632	0.338	1.27E-203	0	Slc23a2
Ctr9	5.68E-207	0.470878812	0.441	0.188	1.22E-202	0	Ctr9
Stag1	8.56E-206	0.368331138	0.964	0.86	1.84E-201	0	Stag1
Srek1	1.29E-205	0.468670642	0.789	0.543	2.77E-201	0	Srek1
Eci2	2.61E-205	0.441515559	0.3	0.102	5.62E-201	0	Eci2
Snx29	3.72E-205	0.497496384	0.637	0.355	8.00E-201	0	Snx29
Lrba	5.27E-204	0.48006203	0.731	0.458	1.13E-199	0	Lrba
Mkl1	1.63E-203	0.447427716	0.841	0.602	3.51E-199	0	Mkl1
Zfp697	3.06E-203	0.464264913	0.42	0.177	6.58E-199	0	Zfp697
Cdk16	3.90E-203	0.46177883	0.373	0.147	8.38E-199	0	Cdk16
Phlpp2	1.02E-202	0.465788298	0.53	0.255	2.19E-198	0	Phlpp2
Parvb	1.31E-201	0.422400285	0.385	0.148	2.81E-197	0	Parvb
Yap1	1.82E-197	0.475192588	0.613	0.335	3.92E-193	0	Yap1
Csnk1e	1.20E-196	0.455842711	0.45	0.199	2.58E-192	0	Csnk1e
Flii	1.93E-196	0.417409399	0.296	0.101	4.16E-192	0	Flii
Rapgef2	2.17E-196	0.391873023	0.956	0.812	4.68E-192	0	Rapgef2
Aplp2	6.63E-196	0.46398532	0.561	0.284	1.43E-191	0	Aplp2
Gpx4	9.88E-196	0.424551149	0.318	0.114	2.13E-191	0	Gpx4
Ankrd33b	1.46E-195	0.456316332	0.741	0.442	3.13E-191	0	Ankrd33b
Vgll3	3.30E-195	0.385184824	0.304	0.105	7.11E-191	0	Vgll3
Smchd1	4.26E-195	0.434847597	0.813	0.564	9.17E-191	0	Smchd1
Mef2d	1.67E-193	0.474989684	0.643	0.362	3.58E-189	0	Mef2d
Abi2	1.29E-191	0.469234906	0.407	0.173	2.78E-187	0	Abi2
Ube2r2	2.61E-191	0.472651103	0.721	0.456	5.62E-187	0	Ube2r2
Ppm1h	1.05E-189	0.39940826	0.496	0.23	2.26E-185	0	Ppm1h
Bod1l	2.07E-189	0.488879995	0.616	0.348	4.45E-185	0	Bod1l
Dnmbp	3.82E-189	0.494235154	0.548	0.285	8.21E-185	0	Dnmbp
Mpp5	8.42E-189	0.459653819	0.468	0.219	1.81E-184	0	Mpp5
Nhsl1	6.95E-188	0.376584542	0.695	0.392	1.49E-183	0	Nhsl1
Spint2	9.68E-188	0.386296355	0.358	0.137	2.08E-183	0	Spint2
Pik3cb	1.53E-187	0.449613081	0.711	0.432	3.28E-183	0	Pik3cb
Dot1l	3.41E-187	0.466332237	0.491	0.238	7.34E-183	0	Dot1l
Hspg2	9.41E-187	0.409017309	0.826	0.537	2.02E-182	0	Hspg2
Elf1	4.52E-186	0.388565755	0.803	0.502	9.73E-182	0	Elf1
Phc3	1.34E-184	0.488304556	0.486	0.238	2.89E-180	0	Phc3
Ankrd13c	4.42E-184	0.461605612	0.535	0.274	9.52E-180	0	Ankrd13c
Fchsd2	3.19E-181	0.426131163	0.781	0.527	6.87E-177	0	Fchsd2
Mgrn1	4.30E-181	0.391688871	0.369	0.149	9.24E-177	0	Mgrn1
Cep350	2.17E-180	0.457512943	0.702	0.436	4.67E-176	0	Cep350
Ddhd2	3.00E-180	0.471813119	0.576	0.314	6.46E-176	0	Ddhd2
Rnf111	1.79E-178	0.459598396	0.657	0.399	3.86E-174	0	Rnf111
Anapc2	1.11E-177	0.396624358	0.293	0.106	2.39E-173	0	Anapc2
Ggnbp2	1.12E-176	0.424863579	0.73	0.476	2.40E-172	0	Ggnbp2
Tfdp2	9.97E-174	0.463336887	0.4	0.177	2.14E-169	0	Tfdp2
Zswim8	1.69E-173	0.472354372	0.542	0.289	3.64E-169	0	Zswim8
Evi5	3.88E-173	0.467119401	0.559	0.309	8.36E-169	0	Evi5
Rapgef1	5.34E-172	0.401351537	0.862	0.628	1.15E-167	0	Rapgef1
Arhgap42	7.40E-172	0.388777035	0.591	0.313	1.59E-167	0	Arhgap42
Arhgef10	9.58E-172	0.411121513	0.312	0.119	2.06E-167	0	Arhgef10
Slc17a5	2.53E-170	0.392522481	0.28	0.101	5.45E-166	0	Slc17a5
Cers2	3.69E-170	0.403605708	0.349	0.141	7.94E-166	0	Cers2
Clip2	9.12E-170	0.442707955	0.57	0.301	1.96E-165	0	Clip2
Gpatch1	2.59E-169	0.388816356	0.313	0.12	5.57E-165	0	Gpatch1
Ehd1	3.08E-169	0.373190833	0.28	0.1	6.62E-165	0	Ehd1
Maea	7.04E-169	0.432801979	0.478	0.235	1.51E-164	0	Maea
St3gal5	8.85E-169	0.312123588	0.349	0.136	1.90E-164	0	St3gal5
Dgke	1.06E-167	0.393333203	0.338	0.135	2.28E-163	0	Dgke
Taz	3.39E-167	0.412038124	0.322	0.128	7.30E-163	0	Taz
Cnn2	7.03E-167	0.397595064	0.416	0.186	1.51E-162	0	Cnn2
Gadd45g	3.74E-166	0.397718256	0.338	0.137	8.05E-162	0	Gadd45g
Pstpip1	4.29E-166	0.431714251	0.388	0.171	9.22E-162	0	Pstpip1
Myo1d	5.91E-166	0.345079632	0.781	0.521	1.27E-161	0	Myo1d
Jade3	8.81E-166	0.407967958	0.778	0.523	1.90E-161	0	Jade3
Fry	4.73E-165	0.508047281	0.403	0.182	1.02E-160	0	Fry
Psmd2	6.61E-165	0.381723294	0.271	0.097	1.42E-160	0	Psmd2
Sbno1	1.44E-164	0.410486332	0.702	0.444	3.09E-160	0	Sbno1
Csnk1g3	5.42E-164	0.443461717	0.656	0.405	1.17E-159	0	Csnk1g3
Nbeal1	6.43E-164	0.403152599	0.554	0.296	1.38E-159	0	Nbeal1
Ptdss1	1.16E-163	0.448904159	0.348	0.147	2.49E-159	0	Ptdss1
Bcor	2.36E-163	0.364047095	0.595	0.32	5.08E-159	0	Bcor
Galns	3.01E-163	0.427252773	0.319	0.129	6.47E-159	0	Galns
Nrbp1	1.19E-162	0.410026617	0.345	0.143	2.57E-158	0	Nrbp1
Slc39a14	3.76E-162	0.386511927	0.367	0.155	8.08E-158	0	Slc39a14
Rgl1	8.44E-162	0.396866977	0.65	0.366	1.82E-157	0	Rgl1
Rnf38	2.12E-161	0.422610994	0.758	0.524	4.57E-157	0	Rnf38
Eps15	3.82E-161	0.414866068	0.626	0.366	8.21E-157	0	Eps15
Acsl3	3.83E-160	0.355592908	0.277	0.1	8.24E-156	0	Acsl3
Mtch1	5.81E-160	0.345171778	0.301	0.115	1.25E-155	0	Mtch1
Slc38a2	1.31E-159	0.412636776	0.589	0.328	2.83E-155	0	Slc38a2
Zfp568	1.47E-159	0.418190798	0.592	0.334	3.16E-155	0	Zfp568
Tcf20	5.76E-159	0.352947989	0.954	0.795	1.24E-154	0	Tcf20
Dock9	7.79E-159	0.328707535	0.793	0.53	1.68E-154	0	Dock9
Eif2s3y	1.13E-158	0.417186315	0.259	0.092	2.44E-154	0	Eif2s3y
Ap3s1	3.36E-157	0.407916969	0.386	0.174	7.23E-153	0	Ap3s1
Prdm2	5.12E-157	0.435045055	0.601	0.352	1.10E-152	0	Prdm2
Cdcp1	3.23E-156	0.381570921	0.357	0.149	6.95E-152	0	Cdcp1
Tra2a	6.80E-156	0.372348563	0.843	0.654	1.46E-151	0	Tra2a
Pced1b	2.00E-154	0.316634057	0.439	0.203	4.30E-150	0	Pced1b
Npepl1	3.45E-154	0.381078816	0.264	0.097	7.43E-150	0	Npepl1
Sgce	7.44E-154	0.428157219	0.488	0.249	1.60E-149	0	Sgce
Ncoa3	3.98E-153	0.393066119	0.498	0.258	8.56E-149	0	Ncoa3
Numb	1.18E-152	0.387208892	0.795	0.58	2.54E-148	0	Numb
Dennd1b	9.48E-152	0.399955341	0.669	0.42	2.04E-147	0	Dennd1b
Supt5	1.69E-151	0.40771586	0.588	0.332	3.63E-147	0	Supt5
Tpst2	7.13E-150	0.403687371	0.471	0.236	1.53E-145	0	Tpst2
Gm2a	4.11E-149	0.380844227	0.256	0.094	8.84E-145	0	Gm2a
Htatsf1	4.88E-149	0.380342764	0.39	0.178	1.05E-144	0	Htatsf1
Rab10	1.40E-148	0.447694039	0.773	0.572	3.02E-144	0	Rab10
Dennd4c	2.23E-148	0.398487984	0.622	0.371	4.79E-144	0	Dennd4c
Erc1	2.28E-148	0.406784646	0.769	0.553	4.91E-144	0	Erc1
Srsf5	3.82E-148	0.401561588	0.754	0.521	8.21E-144	0	Srsf5
Inpp4a	8.69E-146	0.41327785	0.384	0.179	1.87E-141	0	Inpp4a
Hibadh	3.26E-145	0.422543898	0.651	0.411	7.01E-141	0	Hibadh
Rnf14	3.83E-145	0.385447549	0.503	0.268	8.25E-141	0	Rnf14
Faf2	8.04E-145	0.416701528	0.529	0.293	1.73E-140	0	Faf2
Arid3b	2.77E-144	0.334778376	0.303	0.121	5.96E-140	0	Arid3b
Eipr1	3.22E-144	0.508773609	0.421	0.213	6.92E-140	0	Eipr1
Kif21a	3.46E-144	0.329090257	0.368	0.161	7.45E-140	0	Kif21a
Arhgef1	5.66E-144	0.400456206	0.517	0.279	1.22E-139	0	Arhgef1
Psmd4	1.70E-143	0.392641278	0.46	0.235	3.67E-139	0	Psmd4
Wdfy2	2.67E-143	0.384198048	0.437	0.217	5.74E-139	0	Wdfy2
Sgsm2	8.48E-143	0.352555836	0.324	0.136	1.82E-138	0	Sgsm2
Irak1	5.25E-142	0.377556155	0.292	0.119	1.13E-137	0	Irak1
Cdk11b	9.58E-142	0.417135955	0.55	0.312	2.06E-137	0	Cdk11b
Ap1b1	1.30E-141	0.350848481	0.383	0.177	2.79E-137	0	Ap1b1
Bahd1	1.44E-141	0.342092335	0.274	0.107	3.09E-137	0	Bahd1
Sntb1	3.15E-141	0.355644629	0.255	0.094	6.78E-137	0	Sntb1
Adar	3.86E-139	0.350483335	0.299	0.123	8.31E-135	0	Adar
Gskip	7.12E-139	0.367645933	0.274	0.109	1.53E-134	0	Gskip
Rybp	8.95E-138	0.372563898	0.77	0.54	1.92E-133	0	Rybp
Dmxl1	7.32E-137	0.374887748	0.668	0.433	1.57E-132	0	Dmxl1
Pan3	1.02E-136	0.344027792	0.873	0.729	2.19E-132	0	Pan3
Mbd6	1.07E-136	0.389084626	0.458	0.234	2.30E-132	0	Mbd6
Wdr66	2.35E-136	0.374386421	0.262	0.102	5.06E-132	0	Wdr66
Stk4	7.15E-136	0.397973484	0.418	0.21	1.54E-131	0	Stk4
Pdpk1	6.44E-135	0.397580064	0.594	0.364	1.38E-130	0	Pdpk1
Rbm39	1.49E-134	0.254887051	0.975	0.921	3.22E-130	0	Rbm39
Rbpj	7.18E-134	0.35626198	0.445	0.23	1.54E-129	0	Rbpj
Rgcc	2.11E-133	0.328347979	0.293	0.121	4.54E-129	0	Rgcc
Luzp1	3.84E-133	0.349075167	0.823	0.627	8.26E-129	0	Luzp1
Gdpd5	3.02E-132	0.328764336	0.316	0.135	6.50E-128	0	Gdpd5
Anxa2	3.12E-132	0.316513231	0.628	0.368	6.71E-128	0	Anxa2
Pptc7	3.99E-131	0.382321999	0.328	0.148	8.57E-127	0	Pptc7
Aebp2	4.94E-131	0.396028154	0.575	0.338	1.06E-126	0	Aebp2
Hprt	1.02E-130	0.335421974	0.299	0.126	2.20E-126	0	Hprt
Kpna6	1.09E-130	0.333138123	0.33	0.146	2.34E-126	0	Kpna6
Napa	1.28E-130	0.350863787	0.333	0.149	2.76E-126	0	Napa
Tln1	2.46E-130	0.365619257	0.514	0.284	5.28E-126	0	Tln1
Pcsk7	3.09E-130	0.374917987	0.434	0.223	6.64E-126	0	Pcsk7
Zzef1	3.74E-130	0.369268246	0.68	0.442	8.05E-126	0	Zzef1
Ttc7b	4.12E-129	0.352006847	0.663	0.416	8.86E-125	0	Ttc7b
Sfi1	2.70E-128	0.332515166	0.826	0.605	5.81E-124	0	Sfi1
Kdsr	2.77E-128	0.32080943	0.27	0.109	5.97E-124	0	Kdsr
Ncoa2	6.36E-128	0.317306803	0.817	0.612	1.37E-123	0	Ncoa2
Senp5	7.74E-128	0.376129943	0.578	0.347	1.66E-123	0	Senp5
Papss1	4.75E-127	0.347919116	0.358	0.167	1.02E-122	0	Papss1
Ttc3	2.23E-126	0.357041638	0.643	0.408	4.79E-122	0	Ttc3
Morc4	2.48E-126	0.326867496	0.323	0.142	5.34E-122	0	Morc4
Krt18	3.79E-126	0.368845019	0.362	0.172	8.16E-122	0	Krt18
Obsl1	4.19E-126	0.355516141	0.389	0.19	9.02E-122	0	Obsl1
Herc2	9.59E-126	0.388262376	0.666	0.442	2.06E-121	0	Herc2
Igf2bp2	2.20E-125	0.391952422	0.659	0.432	4.72E-121	0	Igf2bp2
Ppp1cb	2.53E-125	0.359264339	0.581	0.353	5.44E-121	0	Ppp1cb
Mxd4	8.60E-125	0.322092815	0.301	0.13	1.85E-120	0	Mxd4
Rnf220	4.12E-124	0.338246384	0.318	0.143	8.86E-120	0	Rnf220
Ubqln1	4.63E-124	0.363953138	0.497	0.277	9.97E-120	0	Ubqln1
Susd1	1.11E-123	0.280221592	0.414	0.201	2.40E-119	0	Susd1
Atp6v1b2	2.18E-123	0.351252317	0.385	0.191	4.69E-119	0	Atp6v1b2
Camsap2	5.96E-123	0.363104524	0.376	0.185	1.28E-118	0	Camsap2
Trim25	6.46E-123	0.343528375	0.506	0.281	1.39E-118	0	Trim25
Mta3	1.39E-122	0.339812368	0.759	0.529	3.00E-118	0	Mta3
Wdr20	4.39E-122	0.384862272	0.542	0.324	9.43E-118	0	Wdr20
Scarb2	4.33E-121	0.335227583	0.3	0.132	9.30E-117	0	Scarb2
Zfp292	5.10E-120	0.373773646	0.59	0.362	1.10E-115	0	Zfp292
Cdh3	5.20E-120	0.351548519	0.706	0.465	1.12E-115	0	Cdh3
Snx7	6.99E-120	0.380723812	0.417	0.22	1.50E-115	0	Snx7
Extl3	9.28E-120	0.397398684	0.321	0.149	2.00E-115	0	Extl3
Megf8	9.65E-120	0.326727428	0.268	0.112	2.08E-115	0	Megf8
Dlg1	9.41E-119	0.330794057	0.768	0.568	2.02E-114	0	Dlg1
Pja2	3.78E-118	0.342203623	0.499	0.281	8.13E-114	0	Pja2
Syap1	6.48E-118	0.318934123	0.274	0.117	1.39E-113	0	Syap1
Fig4	1.28E-117	0.330663732	0.278	0.12	2.76E-113	0	Fig4
Zscan21	1.44E-117	0.308111174	0.283	0.121	3.09E-113	0	Zscan21
Arfgef2	1.10E-116	0.352305116	0.566	0.342	2.36E-112	0	Arfgef2
Cnst	1.31E-116	0.300980473	0.272	0.115	2.83E-112	0	Cnst
Fam120a	4.30E-116	0.326278689	0.79	0.593	9.26E-112	0	Fam120a
Pip5k1b	5.55E-116	0.339249274	0.465	0.258	1.20E-111	0	Pip5k1b
Stat2	9.70E-116	0.385033374	0.336	0.164	2.09E-111	0	Stat2
Nsmce2	6.73E-114	0.373047725	0.727	0.52	1.45E-109	0	Nsmce2
Aig1	1.49E-113	0.347152961	0.433	0.232	3.20E-109	0	Aig1
Rab22a	2.45E-113	0.353583717	0.496	0.285	5.28E-109	0	Rab22a
Bptf	6.56E-113	0.333944731	0.699	0.482	1.41E-108	0	Bptf
Anapc1	7.19E-113	0.351530303	0.533	0.316	1.55E-108	0	Anapc1
Bcl9l	9.61E-113	0.275505999	0.289	0.125	2.07E-108	0	Bcl9l
Phlpp1	1.05E-112	0.321853539	0.645	0.414	2.26E-108	0	Phlpp1
Rrp1b	1.95E-112	0.303885978	0.282	0.124	4.19E-108	0	Rrp1b
Dock6	2.99E-112	0.339539125	0.534	0.311	6.43E-108	0	Dock6
Epb41l5	3.22E-112	0.301701702	0.281	0.122	6.93E-108	0	Epb41l5
Als2cl	1.69E-111	0.312152475	0.312	0.142	3.63E-107	0	Als2cl
Rbmx	2.79E-111	0.292730295	0.287	0.127	6.00E-107	0	Rbmx
Stx2	2.09E-110	0.331680139	0.298	0.137	4.49E-106	0	Stx2
Snx3	4.02E-110	0.356050269	0.53	0.32	8.65E-106	0	Snx3
Hps5	4.69E-110	0.32341486	0.367	0.184	1.01E-105	0	Hps5
Appl2	5.21E-110	0.317110584	0.271	0.119	1.12E-105	0	Appl2
Hsd17b4	6.90E-110	0.304803298	0.372	0.185	1.49E-105	0	Hsd17b4
2810474O19Rik	1.26E-109	0.340504419	0.382	0.197	2.71E-105	0	2810474O19Rik
Gm26745	2.44E-109	0.305205022	0.303	0.14	5.26E-105	0	Gm26745
Nkain1	1.24E-108	0.290411883	0.397	0.198	2.68E-104	0	Nkain1
Rsrp1	3.78E-108	0.287994062	0.881	0.714	8.13E-104	0	Rsrp1
U2af2	6.07E-108	0.324716068	0.479	0.272	1.30E-103	0	U2af2
Prrc2b	3.87E-107	0.326632398	0.7	0.475	8.33E-103	0	Prrc2b
Ube2e1	4.15E-107	0.382785761	0.467	0.271	8.92E-103	0	Ube2e1
Txlna	1.04E-106	0.327020265	0.352	0.175	2.24E-102	0	Txlna
Sppl3	3.01E-106	0.318286158	0.762	0.557	6.48E-102	0	Sppl3
Bri3	4.70E-106	0.300192043	0.261	0.114	1.01E-101	0	Bri3
Klf9	5.90E-105	0.302294564	0.254	0.111	1.27E-100	0	Klf9
Gm28153	7.55E-105	0.420243412	0.416	0.23	1.62E-100	0	Gm28153
Usp1	9.09E-105	0.293329701	0.287	0.13	1.96E-100	0	Usp1
Phrf1	3.01E-104	0.342692164	0.562	0.35	6.47E-100	0	Phrf1
Pcgf5	4.69E-104	0.25121374	0.737	0.515	1.01E-99	0	Pcgf5
2-Mar	1.71E-103	0.302602238	0.375	0.194	3.67E-99	0	2-Mar
Jade1	4.52E-103	0.293472468	0.683	0.445	9.73E-99	0	Jade1
Dbnl	1.21E-102	0.333095751	0.301	0.144	2.61E-98	0	Dbnl
Fxr2	1.36E-102	0.324874493	0.421	0.23	2.93E-98	0	Fxr2
Rabep1	1.61E-102	0.323502947	0.724	0.522	3.47E-98	0	Rabep1
Capn2	1.64E-102	0.264599134	0.265	0.117	3.53E-98	0	Capn2
Tead4	6.37E-102	0.294421106	0.512	0.297	1.37E-97	0	Tead4
Sptan1	9.57E-102	0.304218403	0.569	0.349	2.06E-97	0	Sptan1
Mapkapk2	2.94E-101	0.32713384	0.398	0.215	6.32E-97	0	Mapkapk2
Kmt5a	3.11E-101	0.315683351	0.479	0.274	6.68E-97	0	Kmt5a
Usp32	3.69E-100	0.32739036	0.611	0.401	7.95E-96	0	Usp32
Sltm	1.61E-99	0.313214695	0.743	0.543	3.47E-95	0	Sltm
Gdap2	2.33E-99	0.302695565	0.269	0.123	5.01E-95	0	Gdap2
Fbxw8	3.76E-98	0.284857079	0.763	0.549	8.08E-94	0	Fbxw8
A930015D03Rik	6.23E-98	0.313726443	0.348	0.181	1.34E-93	0	A930015D03Rik
Wwp1	1.33E-97	0.307861322	0.602	0.391	2.86E-93	0	Wwp1
Epc1	5.08E-97	0.31432321	0.476	0.279	1.09E-92	0	Epc1
Lmbrd1	3.87E-96	0.289062078	0.308	0.152	8.34E-92	0	Lmbrd1
Rnf145	5.04E-96	0.295872431	0.391	0.212	1.08E-91	0	Rnf145
Krt8	5.88E-95	0.317784605	0.471	0.271	1.26E-90	0	Krt8
Nmnat3	7.26E-95	0.280553239	0.302	0.146	1.56E-90	0	Nmnat3
Scaper	8.60E-95	0.311249359	0.684	0.477	1.85E-90	0	Scaper
Uba6	2.58E-94	0.288912557	0.591	0.376	5.55E-90	0	Uba6
Uty	3.05E-94	0.264477414	0.33	0.162	6.55E-90	0	Uty
Cltc	4.46E-94	0.301557043	0.594	0.39	9.60E-90	0	Cltc
Numa1	8.79E-94	0.302402142	0.589	0.377	1.89E-89	0	Numa1
Susd6	9.97E-93	0.269783678	0.581	0.367	2.14E-88	0	Susd6
Ccnl2	2.15E-92	0.309951213	0.693	0.485	4.63E-88	0	Ccnl2
Cdk9	3.63E-92	0.316665611	0.294	0.144	7.80E-88	0	Cdk9
Tmem259	2.87E-91	0.300084924	0.439	0.252	6.17E-87	0	Tmem259
Heca	4.74E-91	0.293260644	0.315	0.159	1.02E-86	0	Heca
Mau2	6.87E-91	0.307256027	0.494	0.3	1.48E-86	0	Mau2
Ppm1b	5.01E-90	0.364846917	0.512	0.325	1.08E-85	0	Ppm1b
Rtf1	2.68E-89	0.303296388	0.497	0.304	5.76E-85	0	Rtf1
Itsn2	8.59E-89	0.2985163	0.607	0.411	1.85E-84	0	Itsn2
Rnf20	1.26E-88	0.285506162	0.306	0.155	2.72E-84	0	Rnf20
Farp2	4.37E-87	0.285522957	0.317	0.163	9.40E-83	0	Farp2
Arfgap1	8.44E-87	0.293730653	0.411	0.235	1.82E-82	0	Arfgap1
Polr2a	3.26E-86	0.300092688	0.532	0.339	7.01E-82	0	Polr2a
Limd1	1.35E-84	0.28754434	0.501	0.31	2.90E-80	0	Limd1
Slc44a1	3.59E-84	0.284816248	0.427	0.248	7.72E-80	0	Slc44a1
Terf2	1.04E-82	0.285775584	0.437	0.259	2.24E-78	0	Terf2
Rac1	1.25E-82	0.282859138	0.475	0.288	2.68E-78	0	Rac1
Araf	2.57E-82	0.285789078	0.405	0.233	5.52E-78	0	Araf
Ammecr1l	1.37E-81	0.265742849	0.369	0.205	2.96E-77	0	Ammecr1l
Klhl26	1.59E-81	0.27009144	0.283	0.142	3.42E-77	0	Klhl26
Stxbp3	7.88E-81	0.264717375	0.297	0.154	1.70E-76	0	Stxbp3
Stk24	1.00E-80	0.298439619	0.64	0.446	2.16E-76	0	Stk24
Snhg20	1.10E-80	0.283074021	0.408	0.237	2.36E-76	0	Snhg20
Sf3b2	1.47E-80	0.269022722	0.386	0.218	3.16E-76	0	Sf3b2
Lmtk2	1.96E-80	0.293366511	0.494	0.304	4.21E-76	0	Lmtk2
Lrrfip2	2.41E-80	0.292057083	0.579	0.388	5.19E-76	0	Lrrfip2
Mapk8ip3	5.53E-80	0.293011709	0.528	0.344	1.19E-75	0	Mapk8ip3
Spag9	7.38E-80	0.270695775	0.748	0.563	1.59E-75	0	Spag9
Swt1	1.80E-79	0.269630688	0.5	0.313	3.86E-75	0	Swt1
Samd8	3.46E-79	0.263764261	0.272	0.137	7.43E-75	0	Samd8
Clk4	9.88E-79	0.286319568	0.49	0.31	2.12E-74	0	Clk4
Brf1	1.34E-78	0.272506679	0.391	0.225	2.89E-74	0	Brf1
Map3k7	3.59E-78	0.278006009	0.396	0.23	7.71E-74	0	Map3k7
Bcap31	2.40E-77	0.256980512	0.32	0.171	5.16E-73	0	Bcap31
Insr	3.78E-77	0.254706612	0.471	0.29	8.13E-73	0	Insr
Usp12	4.79E-77	0.279019594	0.459	0.279	1.03E-72	0	Usp12
Tspan5	6.54E-77	0.332401317	0.359	0.201	1.41E-72	0	Tspan5
Ptpn23	5.89E-76	0.257843197	0.28	0.144	1.27E-71	0	Ptpn23
Kidins220	2.47E-75	0.265731	0.502	0.316	5.31E-71	0	Kidins220
Usp7	5.59E-75	0.250253831	0.76	0.564	1.20E-70	0	Usp7
Myl12b	8.80E-75	0.256968168	0.289	0.151	1.89E-70	0	Myl12b
Tpp2	2.62E-74	0.253030904	0.531	0.346	5.64E-70	0	Tpp2
Golga2	1.03E-73	0.254891541	0.295	0.156	2.22E-69	0	Golga2
Kat7	6.93E-73	0.251347236	0.527	0.34	1.49E-68	0	Kat7
Ndel1	9.09E-73	0.266273464	0.415	0.251	1.96E-68	0	Ndel1
Zfp950	1.15E-71	0.284612237	0.427	0.264	2.47E-67	0	Zfp950
Arf4	1.40E-71	0.366819515	0.462	0.304	3.01E-67	0	Arf4
Fam193b	7.15E-68	0.256186015	0.451	0.283	1.54E-63	0	Fam193b
AU040320	1.04E-66	0.255322634	0.286	0.156	2.24E-62	0	AU040320
Ranbp2	2.13E-66	0.279314807	0.607	0.435	4.57E-62	0	Ranbp2
Iars2	3.60E-66	0.281833066	0.326	0.187	7.75E-62	0	Iars2
Casc3	8.13E-66	0.260714567	0.402	0.247	1.75E-61	0	Casc3
Arhgap5	1.72E-65	0.278297282	0.632	0.457	3.71E-61	0	Arhgap5
Otud4	1.24E-64	0.260494553	0.536	0.367	2.67E-60	0	Otud4
Cab39	1.51E-64	0.25550648	0.543	0.371	3.25E-60	0	Cab39
Eefsec	3.96E-63	0.305553447	0.499	0.34	8.51E-59	0	Eefsec
Pphln1	1.15E-61	0.299550738	0.37	0.23	2.47E-57	0	Pphln1
Chp1	3.38E-61	0.258251505	0.435	0.279	7.28E-57	0	Chp1
Dap	7.44E-60	0.26203289	0.364	0.222	1.60E-55	0	Dap
Ncam1	0	1.852323366	0.976	0.494	0	1	Ncam1
Tiam2	0	1.794095579	0.92	0.283	0	1	Tiam2
Plac8	0	1.751279131	0.885	0.259	0	1	Plac8
Rora	0	1.732638224	0.88	0.433	0	1	Rora
Gna14	0	1.713189946	0.898	0.24	0	1	Gna14
Tnfrsf9	0	1.67533786	0.931	0.344	0	1	Tnfrsf9
Nuak1	0	1.645792809	0.698	0.112	0	1	Nuak1
Nmnat2	0	1.617678228	0.587	0.057	0	1	Nmnat2
Igfbp7	0	1.589408355	0.711	0.165	0	1	Igfbp7
Sh3kbp1	0	1.588142749	0.879	0.298	0	1	Sh3kbp1
Anxa11	0	1.568071945	0.94	0.378	0	1	Anxa11
Pcsk6	0	1.541721162	0.42	0.065	0	1	Pcsk6
Tcf4	0	1.538898728	0.985	0.727	0	1	Tcf4
Pla2g4d	0	1.512431558	0.611	0.07	0	1	Pla2g4d
Tiam1	0	1.512397002	0.956	0.403	0	1	Tiam1
Aldh1a3	0	1.501339127	0.564	0.075	0	1	Aldh1a3
Cmip	0	1.441227446	0.966	0.654	0	1	Cmip
Ano6	0	1.410106032	0.975	0.558	0	1	Ano6
Ppp2r2c	0	1.380535844	0.855	0.216	0	1	Ppp2r2c
Frmd4a	0	1.376285329	0.968	0.556	0	1	Frmd4a
Ypel2	0	1.373232821	0.637	0.148	0	1	Ypel2
Prune2	0	1.349227845	0.983	0.513	0	1	Prune2
Pla2g4f	0	1.335710875	0.593	0.089	0	1	Pla2g4f
Arntl	0	1.324369399	0.739	0.189	0	1	Arntl
Sema6a	0	1.294408555	0.793	0.38	0	1	Sema6a
Anxa41	0	1.29375194	0.951	0.506	0	1	Anxa4
Olr1	0	1.288538815	0.555	0.148	0	1	Olr1
Sh3pxd2a	0	1.246931323	0.97	0.579	0	1	Sh3pxd2a
Pappa2	0	1.23659017	0.97	0.728	0	1	Pappa2
Phactr1	0	1.236402245	0.483	0.161	0	1	Phactr1
Gsg1l	0	1.234215965	0.326	0.027	0	1	Gsg1l
Car2	0	1.233125709	0.798	0.303	0	1	Car2
Ptprm	0	1.228892534	0.959	0.551	0	1	Ptprm
Tmem132e	0	1.220955579	0.597	0.105	0	1	Tmem132e
Cyfip2	0	1.215967512	0.524	0.078	0	1	Cyfip2
Zdhhc141	0	1.206577871	0.841	0.363	0	1	Zdhhc14
Rgs12	0	1.195465323	0.647	0.178	0	1	Rgs12
Vav3	0	1.168704373	0.738	0.287	0	1	Vav3
Col4a1	0	1.168542831	0.944	0.469	0	1	Col4a1
Zmat4	0	1.163359435	0.386	0.082	0	1	Zmat4
Wipf1	0	1.131954484	0.88	0.402	0	1	Wipf1
Actn1	0	1.121658736	0.861	0.399	0	1	Actn1
Col4a2	0	1.111651854	0.905	0.388	0	1	Col4a2
Ada	0	1.108966576	0.527	0.108	0	1	Ada
Slco3a1	0	1.097308038	0.735	0.235	0	1	Slco3a1
Arhgap22	0	1.096558988	0.712	0.238	0	1	Arhgap22
Fam78b	0	1.082729546	0.86	0.398	0	1	Fam78b
Nav1	0	1.07828205	0.877	0.475	0	1	Nav1
Svep1	0	1.062839329	0.568	0.165	0	1	Svep1
Gpat3	0	1.059139331	0.489	0.118	0	1	Gpat3
Nlrc5	0	1.053160017	0.439	0.078	0	1	Nlrc5
Sct	0	1.043955185	0.703	0.276	0	1	Sct
Asap31	0	1.0403181	0.61	0.207	0	1	Asap3
Coro2a	0	1.038209089	0.574	0.14	0	1	Coro2a
Rgs17	0	1.028308817	0.578	0.214	0	1	Rgs17
Hsd17b7	0	1.017090517	0.481	0.095	0	1	Hsd17b7
Afap1l2	0	1.008982929	0.958	0.562	0	1	Afap1l2
Hivep1	0	1.006962089	0.662	0.239	0	1	Hivep1
P3h2	0	1.004802488	0.735	0.251	0	1	P3h2
1500009L16Rik	0	0.996714794	0.565	0.138	0	1	1500009L16Rik
Pitrm1	0	0.993513413	0.732	0.277	0	1	Pitrm1
Mboat2	0	0.992761891	0.433	0.143	0	1	Mboat2
Nid1	0	0.979090798	0.713	0.315	0	1	Nid1
Fam13b	0	0.975868025	0.856	0.549	0	1	Fam13b
Fam126a	0	0.971501876	0.651	0.234	0	1	Fam126a
Parva	0	0.971488186	0.968	0.678	0	1	Parva
Serpinb9e	0	0.965105364	0.563	0.212	0	1	Serpinb9e
Pla2g4e	0	0.963774629	0.413	0.07	0	1	Pla2g4e
Pard6g1	0	0.961071936	0.761	0.348	0	1	Pard6g
Lhfp	0	0.959605452	0.887	0.462	0	1	Lhfp
Proser2	0	0.957663553	0.451	0.119	0	1	Proser2
Rab8b	0	0.95609332	0.758	0.322	0	1	Rab8b
Rps6ka2	0	0.954324742	0.649	0.213	0	1	Rps6ka2
Tmcc31	0	0.951529493	0.782	0.415	0	1	Tmcc3
Myo1e	0	0.943829622	0.897	0.533	0	1	Myo1e
Lama5	0	0.94364481	0.751	0.32	0	1	Lama5
Pdcd4	0	0.941716253	0.642	0.251	0	1	Pdcd4
Hdac4	0	0.941483279	0.911	0.51	0	1	Hdac4
Mmp15	0	0.938323808	0.469	0.135	0	1	Mmp15
Pde4dip	0	0.936268383	0.874	0.444	0	1	Pde4dip
Nek6	0	0.930181803	0.641	0.215	0	1	Nek6
Gcnt2	0	0.929510588	0.534	0.178	0	1	Gcnt2
Gfod1	0	0.929431544	0.789	0.325	0	1	Gfod1
Nostrin	0	0.923716921	0.638	0.211	0	1	Nostrin
Rcan1	0	0.918557923	0.57	0.198	0	1	Rcan1
Lasp1	0	0.911064155	0.736	0.346	0	1	Lasp1
Kif5c	0	0.904945252	0.426	0.123	0	1	Kif5c
Nedd4l	0	0.904732802	0.866	0.498	0	1	Nedd4l
Anxa21	0	0.902712929	0.758	0.357	0	1	Anxa2
Nkain11	0	0.902089374	0.536	0.186	0	1	Nkain1
Lgals9	0	0.901784083	0.792	0.391	0	1	Lgals9
Hpcal1	0	0.896250162	0.693	0.304	0	1	Hpcal1
Plekha5	0	0.895997752	0.945	0.72	0	1	Plekha5
Hspg21	0	0.893145606	0.911	0.532	0	1	Hspg2
Btbd11	0	0.89312358	0.381	0.112	0	1	Btbd11
Rap1gap	0	0.886589195	0.447	0.103	0	1	Rap1gap
Psg29	0	0.886092509	0.402	0.122	0	1	Psg29
Sulf2	0	0.878136122	0.451	0.13	0	1	Sulf2
Ptprf	0	0.87308296	0.609	0.216	0	1	Ptprf
Dtx1	0	0.87291574	0.404	0.089	0	1	Dtx1
9-Sep	0	0.870639633	0.952	0.613	0	1	9-Sep
Mical3	0	0.868429744	0.955	0.647	0	1	Mical3
Basp1	0	0.859507369	0.946	0.652	0	1	Basp1
Nckap5l	0	0.857137935	0.465	0.117	0	1	Nckap5l
Mast4	0	0.842290007	0.909	0.571	0	1	Mast4
Rgs5	0	0.84044187	0.299	0.069	0	1	Rgs5
Mgat5	0	0.838856408	0.91	0.569	0	1	Mgat5
Fblim1	0	0.832806123	0.608	0.25	0	1	Fblim1
Ctnnbip1	0	0.832044159	0.638	0.26	0	1	Ctnnbip1
Sgpp2	0	0.830984305	0.596	0.211	0	1	Sgpp2
Cdhr5	0	0.830975579	0.419	0.111	0	1	Cdhr5
Anks1	0	0.830244808	0.758	0.426	0	1	Anks1
Fam171a1	0	0.82896754	0.715	0.319	0	1	Fam171a1
Gpr1	0	0.828516848	0.396	0.081	0	1	Gpr1
Dock1	0	0.828147184	0.944	0.671	0	1	Dock1
Fryl	0	0.807230884	0.883	0.566	0	1	Fryl
Plekhg3	0	0.803936263	0.432	0.128	0	1	Plekhg3
Lrrc8d	0	0.8026652	0.773	0.43	0	1	Lrrc8d
Sema3e	0	0.799051211	0.743	0.369	0	1	Sema3e
Ncmap	0	0.798810299	0.481	0.138	0	1	Ncmap
Dst	0	0.797915337	0.997	0.814	0	1	Dst
Fam168a	0	0.797444482	0.912	0.599	0	1	Fam168a
Chst11	0	0.794450061	0.782	0.321	0	1	Chst11
Mcu	0	0.77461896	0.839	0.56	0	1	Mcu
Ets2	0	0.772218356	0.515	0.188	0	1	Ets2
Trp53i11	0	0.77041628	0.337	0.072	0	1	Trp53i11
Dpysl3	0	0.766735714	0.37	0.093	0	1	Dpysl3
Ttll11	0	0.766498742	0.283	0.049	0	1	Ttll11
Elmo1	0	0.765861993	0.846	0.536	0	1	Elmo1
Dapk1	0	0.762725882	0.884	0.541	0	1	Dapk1
Creb3l2	0	0.762358126	0.823	0.439	0	1	Creb3l2
Flt1	0	0.761485261	0.865	0.618	0	1	Flt1
Myof1	0	0.755109666	0.861	0.476	0	1	Myof
Piezo2	0	0.749973613	0.676	0.252	0	1	Piezo2
Bcas3	0	0.747477344	0.85	0.589	0	1	Bcas3
Vstm4	0	0.747412976	0.477	0.153	0	1	Vstm4
Vstm5	0	0.747267967	0.332	0.067	0	1	Vstm5
Kdm6b	0	0.743694756	0.505	0.184	0	1	Kdm6b
Micall1	0	0.741519033	0.51	0.202	0	1	Micall1
Lamb1	0	0.738608678	0.551	0.216	0	1	Lamb1
Cdc42se2	0	0.732092888	0.806	0.478	0	1	Cdc42se2
Adtrp	0	0.726353483	0.278	0.049	0	1	Adtrp
Plekhg1	0	0.725718261	0.828	0.46	0	1	Plekhg1
Ddb1	0	0.722677191	0.781	0.46	0	1	Ddb1
Palm	0	0.720593121	0.598	0.268	0	1	Palm
Ralbp1	0	0.704263833	0.815	0.481	0	1	Ralbp1
Dyrk2	0	0.694472494	0.429	0.138	0	1	Dyrk2
Phf20	0	0.689278258	0.86	0.583	0	1	Phf20
Pcdh12	0	0.686771248	0.333	0.068	0	1	Pcdh12
Mpzl1	0	0.678618931	0.806	0.498	0	1	Mpzl1
Cald1	0	0.672344934	0.96	0.73	0	1	Cald1
Adgrg6	0	0.671879165	0.753	0.402	0	1	Adgrg6
Mtss1	0	0.652716169	0.956	0.787	0	1	Mtss1
Rffl	0	0.652616163	0.869	0.547	0	1	Rffl
Etv6	0	0.650396844	0.915	0.654	0	1	Etv6
Trio	0	0.647600086	0.939	0.695	0	1	Trio
Arhgap6	0	0.645464784	0.86	0.444	0	1	Arhgap6
Faxc	0	0.633278186	0.306	0.074	0	1	Faxc
Ccser1	0	0.617736795	0.882	0.556	0	1	Ccser1
Xylt1	0	0.581591926	0.805	0.396	0	1	Xylt1
Fndc3b1	0	0.579155129	0.995	0.9	0	1	Fndc3b
Frmd4b	0	0.573838413	0.794	0.448	0	1	Frmd4b
Macf11	0	0.564233496	0.993	0.903	0	1	Macf1
Lamc1	8.91E-308	0.587300063	0.84	0.539	1.92E-303	1	Lamc1
Sema3f	5.80E-307	0.684843815	0.521	0.205	1.25E-302	1	Sema3f
Map2k1	4.75E-301	0.668799721	0.808	0.535	1.02E-296	1	Map2k1
Zfp532	3.69E-300	0.683876834	0.672	0.335	7.94E-296	1	Zfp532
Ptbp3	8.41E-299	0.582580011	0.896	0.694	1.81E-294	1	Ptbp3
Gbe1	6.65E-297	0.755392313	0.602	0.289	1.43E-292	1	Gbe1
Fgfr1	1.28E-296	0.677141229	0.706	0.364	2.76E-292	1	Fgfr1
Serpinb9g	1.09E-294	0.592816543	0.281	0.069	2.35E-290	1	Serpinb9g
Mill2	8.84E-293	0.703596554	0.355	0.109	1.90E-288	1	Mill2
Braf	1.13E-291	0.601182393	0.879	0.666	2.44E-287	1	Braf
Tsc22d1	1.85E-291	0.73385788	0.73	0.438	3.98E-287	1	Tsc22d1
Meis2	8.09E-289	0.658722196	0.715	0.383	1.74E-284	1	Meis2
Sipa1l3	1.62E-287	1.09043349	0.658	0.38	3.49E-283	1	Sipa1l3
Stk39	2.52E-283	0.651498741	0.68	0.353	5.43E-279	1	Stk39
Sema4d	2.62E-278	0.633008735	0.656	0.33	5.63E-274	1	Sema4d
Arhgap101	8.29E-277	0.50259869	0.99	0.88	1.78E-272	1	Arhgap10
Tfap2c	2.49E-276	0.653335712	0.594	0.281	5.36E-272	1	Tfap2c
Rcor1	5.25E-275	0.61240998	0.84	0.576	1.13E-270	1	Rcor1
Igsf3	3.36E-272	0.618239909	0.351	0.108	7.23E-268	1	Igsf3
Tpm1	1.97E-271	0.626946999	0.791	0.508	4.24E-267	1	Tpm1
Arpc1b	1.55E-267	0.635013265	0.606	0.301	3.34E-263	1	Arpc1b
Susd11	4.55E-267	0.72331579	0.479	0.196	9.78E-263	1	Susd1
Soga1	1.13E-265	0.691532114	0.568	0.269	2.42E-261	1	Soga1
Syde1	2.82E-264	0.61349809	0.397	0.138	6.06E-260	1	Syde1
Lrrfip1	3.72E-264	0.63560774	0.629	0.311	8.01E-260	1	Lrrfip1
Mical2	1.97E-263	0.62634027	0.572	0.263	4.24E-259	1	Mical2
Fam69a	7.80E-263	0.760314134	0.312	0.093	1.68E-258	1	Fam69a
Adcy7	2.95E-259	0.569690259	0.721	0.377	6.34E-255	1	Adcy7
Fhit	1.39E-257	0.763109427	0.738	0.473	3.00E-253	1	Fhit
Ctif	4.39E-257	0.715263861	0.537	0.247	9.44E-253	1	Ctif
Entpd1	7.54E-257	0.668603346	0.518	0.223	1.62E-252	1	Entpd1
S100a6	3.74E-256	0.698031354	0.462	0.191	8.05E-252	1	S100a6
Tbc1d8	4.76E-256	0.704033186	0.442	0.171	1.02E-251	1	Tbc1d8
Pfkp	9.33E-256	0.676558225	0.591	0.292	2.01E-251	1	Pfkp
Plpp3	1.77E-254	0.783373459	0.741	0.467	3.80E-250	1	Plpp3
Dnm2	1.85E-254	0.552218744	0.852	0.611	3.98E-250	1	Dnm2
Adgrl3	6.70E-249	0.624564014	0.348	0.113	1.44E-244	1	Adgrl3
Sec14l1	9.38E-249	0.664613411	0.576	0.283	2.02E-244	1	Sec14l1
Amotl1	2.92E-247	0.643815566	0.495	0.217	6.28E-243	1	Amotl1
Serpinb9f	3.19E-247	0.613745026	0.256	0.067	6.87E-243	1	Serpinb9f
Bdkrb2	1.69E-245	0.721119661	0.287	0.082	3.63E-241	1	Bdkrb2
Brpf3	6.91E-243	0.61133883	0.645	0.352	1.49E-238	1	Brpf3
Arhgap31	1.86E-242	0.494298228	0.911	0.685	4.00E-238	1	Arhgap31
Dock5	1.61E-239	0.488922472	0.852	0.548	3.46E-235	1	Dock5
Ppard	1.23E-237	0.698846179	0.6	0.318	2.65E-233	1	Ppard
Arid5b	1.20E-236	0.444834363	0.96	0.808	2.58E-232	1	Arid5b
Sema6d	1.89E-236	0.536919793	0.481	0.199	4.07E-232	1	Sema6d
Man1a	7.28E-236	0.548157898	0.756	0.462	1.57E-231	1	Man1a
Fam83b	1.20E-231	0.583473779	0.412	0.159	2.58E-227	1	Fam83b
Mmp28	8.78E-231	0.572757691	0.333	0.11	1.89E-226	1	Mmp28
Sema4c	1.84E-229	0.572876267	0.348	0.119	3.96E-225	1	Sema4c
Arhgap23	3.46E-229	0.547666339	0.805	0.559	7.43E-225	1	Arhgap23
Tex2	1.42E-228	0.592386862	0.734	0.462	3.05E-224	1	Tex2
Itga3	7.39E-228	0.602601038	0.362	0.129	1.59E-223	1	Itga3
Chsy3	1.41E-227	0.532485162	0.638	0.324	3.03E-223	1	Chsy3
Lrch11	3.24E-224	0.485668871	0.908	0.641	6.96E-220	1	Lrch1
Lcp1	6.00E-224	0.646119108	0.392	0.15	1.29E-219	1	Lcp1
Srpk2	1.85E-222	0.80383096	0.693	0.457	3.99E-218	1	Srpk2
Tmc5	7.54E-222	0.585040127	0.367	0.134	1.62E-217	1	Tmc5
Nsd3	3.74E-221	0.389098299	0.932	0.759	8.04E-217	1	Nsd3
Rnf157	1.28E-217	0.567964672	0.445	0.185	2.74E-213	1	Rnf157
Kalrn	9.14E-216	0.569426039	0.603	0.313	1.97E-211	1	Kalrn
Rap1a	2.89E-215	0.544966427	0.746	0.491	6.22E-211	1	Rap1a
Tet3	3.26E-215	0.615379199	0.676	0.401	7.02E-211	1	Tet3
Arhgef11	4.52E-213	0.567181894	0.764	0.522	9.72E-209	1	Arhgef11
Gnb4	1.01E-211	0.626822938	0.545	0.271	2.17E-207	1	Gnb4
Map4k4	4.47E-211	0.46103563	0.901	0.705	9.61E-207	1	Map4k4
Pros1	4.87E-211	0.611752866	0.493	0.233	1.05E-206	1	Pros1
Iffo1	2.29E-210	0.519585065	0.325	0.111	4.92E-206	1	Iffo1
Cbx71	2.74E-210	0.47002508	0.848	0.558	5.90E-206	1	Cbx7
Snd1	5.54E-209	0.436067963	0.952	0.843	1.19E-204	1	Snd1
Ttll3	3.51E-207	0.52938249	0.316	0.109	7.55E-203	1	Ttll3
Fubp3	5.94E-207	0.584596622	0.543	0.278	1.28E-202	1	Fubp3
Srgap2	4.55E-206	0.503718973	0.819	0.581	9.79E-202	1	Srgap2
Noct	6.38E-205	0.539407066	0.777	0.536	1.37E-200	1	Noct
Prl2c5	9.32E-205	0.7067735	0.355	0.136	2.00E-200	1	Prl2c5
Grb2	1.91E-204	0.522857145	0.78	0.541	4.11E-200	1	Grb2
Tpbpa	3.72E-204	0.527296991	0.689	0.397	8.01E-200	1	Tpbpa
Sri	3.10E-201	0.568265156	0.471	0.222	6.68E-197	1	Sri
Ldlr	4.51E-201	0.580605869	0.621	0.349	9.69E-197	1	Ldlr
Amz1	4.04E-200	0.507325208	0.27	0.085	8.69E-196	1	Amz1
Ide	5.93E-200	0.587084221	0.421	0.183	1.28E-195	1	Ide
Pygl	5.42E-198	0.541639037	0.267	0.085	1.17E-193	1	Pygl
Prex2	6.32E-198	0.558787678	0.636	0.357	1.36E-193	1	Prex2
Efhd2	2.62E-196	0.539756712	0.338	0.125	5.64E-192	1	Efhd2
Zc3h7b	6.04E-195	0.608185231	0.264	0.085	1.30E-190	1	Zc3h7b
Serpinb9d	8.30E-193	0.59223446	0.267	0.085	1.79E-188	1	Serpinb9d
Ddhd1	7.05E-192	0.560462987	0.424	0.188	1.52E-187	1	Ddhd1
Chd9	1.93E-190	0.615410911	0.478	0.233	4.15E-186	1	Chd9
Gnaq	2.10E-190	0.388759673	0.946	0.831	4.53E-186	1	Gnaq
Ptger3	4.42E-190	0.559008793	0.363	0.143	9.52E-186	1	Ptger3
Tpm4	1.31E-189	0.572779462	0.616	0.365	2.83E-185	1	Tpm4
Hic2	6.38E-189	0.531744589	0.634	0.371	1.37E-184	1	Hic2
Tnfaip8	2.67E-188	0.392863095	0.654	0.359	5.74E-184	1	Tnfaip8
Rasa3	5.70E-188	0.564974201	0.436	0.196	1.23E-183	1	Rasa3
Arsb	8.40E-188	0.539630343	0.329	0.123	1.81E-183	1	Arsb
Myo1d1	9.72E-188	0.65460453	0.745	0.528	2.09E-183	1	Myo1d
Trak1	2.02E-187	0.554512589	0.656	0.403	4.35E-183	1	Trak1
Agap3	4.80E-186	0.555229817	0.544	0.292	1.03E-181	1	Agap3
Cux11	7.18E-186	0.406452315	0.927	0.747	1.54E-181	1	Cux1
Msi2	1.97E-185	0.439244003	0.897	0.69	4.25E-181	1	Msi2
Klf13	4.62E-185	0.513820741	0.639	0.369	9.95E-181	1	Klf13
Pde8a	2.49E-184	0.524928814	0.526	0.264	5.36E-180	1	Pde8a
Fam76a	4.69E-184	0.558729769	0.466	0.226	1.01E-179	1	Fam76a
Spsb1	5.90E-184	0.784664872	0.331	0.13	1.27E-179	1	Spsb1
Ahnak1	6.70E-184	0.503400364	0.753	0.492	1.44E-179	1	Ahnak
Alas1	1.33E-183	0.52202383	0.29	0.102	2.87E-179	1	Alas1
Tbc1d1	5.66E-180	0.649006117	0.476	0.239	1.22E-175	1	Tbc1d1
Tbc1d22a	7.84E-179	0.560105408	0.593	0.352	1.69E-174	1	Tbc1d22a
Nectin2	2.83E-178	0.551579237	0.484	0.242	6.10E-174	1	Nectin2
Liph	8.10E-176	0.516109971	0.373	0.155	1.74E-171	1	Liph
Serinc5	1.12E-175	0.559620358	0.413	0.187	2.40E-171	1	Serinc5
Tns11	4.26E-173	0.420477329	0.799	0.518	9.16E-169	1	Tns1
Dab2ip	7.16E-173	0.527564849	0.385	0.165	1.54E-168	1	Dab2ip
Peg31	1.91E-172	0.353852267	0.945	0.794	4.10E-168	1	Peg3
Atp2b4	3.20E-172	0.560235382	0.303	0.111	6.88E-168	1	Atp2b4
Fam49b	1.81E-171	0.513723727	0.795	0.591	3.88E-167	1	Fam49b
Ralgps2	7.95E-170	0.562665906	0.555	0.31	1.71E-165	1	Ralgps2
Dip2b	1.96E-169	0.460840775	0.833	0.633	4.21E-165	1	Dip2b
Cdk17	5.23E-168	0.520507455	0.636	0.389	1.12E-163	1	Cdk17
Eef2k	5.95E-168	0.518721267	0.479	0.239	1.28E-163	1	Eef2k
Cdh5	1.72E-167	0.545465454	0.539	0.295	3.70E-163	1	Cdh5
Snx24	2.03E-163	0.480991108	0.66	0.406	4.36E-159	1	Snx24
Ntn1	1.35E-161	0.580271524	0.381	0.167	2.90E-157	1	Ntn1
Pgm1	3.75E-161	0.461612351	0.284	0.105	8.06E-157	1	Pgm1
Rai14	1.95E-160	0.483481179	0.721	0.483	4.19E-156	1	Rai14
Tmeff1	3.50E-160	0.50042161	0.52	0.28	7.53E-156	1	Tmeff1
Park2	5.29E-160	0.554286837	0.558	0.318	1.14E-155	1	Park2
Capn15	2.68E-159	0.491522588	0.621	0.381	5.77E-155	1	Capn15
Cdyl2	1.17E-158	0.487252797	0.47	0.233	2.51E-154	1	Cdyl2
Gm38399	2.75E-158	0.582877742	0.564	0.325	5.91E-154	1	Gm38399
Cfap43	8.48E-157	0.471508907	0.29	0.109	1.82E-152	1	Cfap43
H2-K1	6.34E-155	0.646425908	0.35	0.156	1.36E-150	1	H2-K1
Rab31	8.60E-155	0.524000656	0.447	0.218	1.85E-150	1	Rab31
Ralb	1.21E-154	0.542596222	0.425	0.208	2.61E-150	1	Ralb
Afap1l11	4.07E-149	0.528679666	0.32	0.133	8.75E-145	1	Afap1l1
Rapgef21	2.91E-148	0.33888076	0.939	0.816	6.26E-144	1	Rapgef2
Zdhhc21	1.00E-146	0.506700109	0.462	0.246	2.16E-142	1	Zdhhc21
Col3a1	3.10E-146	0.539356959	0.259	0.095	6.66E-142	1	Col3a1
Sbf1	6.22E-146	0.503124779	0.357	0.162	1.34E-141	1	Sbf1
Pacsin2	1.93E-145	0.453566641	0.68	0.443	4.16E-141	1	Pacsin2
Adgrl1	6.62E-145	0.479886383	0.318	0.131	1.42E-140	1	Adgrl1
Cblb	6.50E-144	0.487844434	0.569	0.341	1.40E-139	1	Cblb
Bend6	7.28E-144	0.459198743	0.267	0.1	1.57E-139	1	Bend6
Cdk14	2.47E-143	0.327924538	0.792	0.559	5.32E-139	1	Cdk14
Lgals3	9.94E-142	0.43804243	0.515	0.282	2.14E-137	1	Lgals3
Tmem191c	1.86E-141	0.473702099	0.314	0.134	4.01E-137	1	Tmem191c
Pkp2	3.06E-140	0.475285903	0.53	0.303	6.59E-136	1	Pkp2
Gmip	1.35E-139	0.48047227	0.421	0.214	2.91E-135	1	Gmip
Rassf3	1.62E-137	0.423410966	0.724	0.499	3.49E-133	1	Rassf3
Afap11	1.95E-137	0.410190708	0.738	0.507	4.19E-133	1	Afap1
Arhgap21	2.23E-137	0.443089496	0.668	0.447	4.81E-133	1	Arhgap21
Lrrk1	2.54E-137	0.468819744	0.326	0.141	5.47E-133	1	Lrrk1
Klhl13	1.56E-136	0.341034412	0.821	0.597	3.35E-132	1	Klhl13
Jazf11	1.89E-136	0.36146417	0.81	0.566	4.06E-132	1	Jazf1
Fermt2	6.34E-135	0.411134929	0.776	0.574	1.36E-130	1	Fermt2
Cyld	1.56E-128	0.442900781	0.328	0.15	3.36E-124	1	Cyld
Arpc2	5.58E-126	0.443079411	0.674	0.493	1.20E-121	1	Arpc2
Myh9	2.38E-125	0.354268547	0.916	0.787	5.12E-121	1	Myh9
Fgd6	6.83E-125	0.433955852	0.568	0.342	1.47E-120	1	Fgd6
Nin	4.25E-124	0.420071759	0.476	0.264	9.13E-120	1	Nin
Itga1	5.45E-122	0.379582925	0.371	0.177	1.17E-117	1	Itga1
Cyth3	7.17E-122	0.408925269	0.609	0.388	1.54E-117	1	Cyth3
Bicdl11	2.72E-121	0.377453437	0.47	0.244	5.86E-117	1	Bicdl1
Pxn	3.11E-121	0.433430856	0.584	0.36	6.69E-117	1	Pxn
Slc44a2	1.38E-120	0.443423789	0.531	0.321	2.96E-116	1	Slc44a2
Morf4l2	3.12E-120	0.437617232	0.614	0.411	6.70E-116	1	Morf4l2
Ralgds	3.11E-119	0.454387706	0.449	0.25	6.69E-115	1	Ralgds
Tor1aip2	2.36E-118	0.429724899	0.678	0.484	5.08E-114	1	Tor1aip2
Zdhhc8	6.38E-117	0.425627175	0.329	0.154	1.37E-112	1	Zdhhc8
Litaf	7.09E-117	0.439995107	0.533	0.329	1.52E-112	1	Litaf
Il1r1	9.87E-117	0.393397339	0.28	0.118	2.12E-112	1	Il1r1
Tanc2	2.37E-114	0.368435854	0.793	0.624	5.11E-110	1	Tanc2
Hip1r	6.34E-113	0.414311328	0.348	0.17	1.36E-108	1	Hip1r
Ostf1	7.54E-113	0.451337115	0.474	0.282	1.62E-108	1	Ostf1
Raf1	5.54E-111	0.401273487	0.607	0.41	1.19E-106	1	Raf1
Iqgap1	6.32E-111	0.376045467	0.808	0.638	1.36E-106	1	Iqgap1
Pld1	2.95E-108	0.429395117	0.482	0.29	6.35E-104	1	Pld1
Bcar3	3.61E-107	0.272195268	0.761	0.514	7.77E-103	1	Bcar3
Zcchc14	5.40E-107	0.42514122	0.511	0.312	1.16E-102	1	Zcchc14
Aprt	3.17E-106	0.416555634	0.38	0.204	6.82E-102	1	Aprt
Cd82	4.76E-104	0.39969052	0.274	0.124	1.02E-99	1	Cd82
Fgd41	8.03E-104	0.368877481	0.653	0.44	1.73E-99	1	Fgd4
Snx91	9.03E-103	0.329982091	0.792	0.603	1.94E-98	1	Snx9
Pparg	7.50E-102	0.318412712	0.787	0.577	1.61E-97	1	Pparg
Inf2	8.62E-102	0.35145113	0.46	0.265	1.86E-97	1	Inf2
Actr2	3.55E-101	0.385971992	0.661	0.487	7.63E-97	1	Actr2
Elk3	6.31E-101	0.33979095	0.393	0.206	1.36E-96	1	Elk3
Galnt10	3.19E-100	0.401171304	0.361	0.185	6.87E-96	1	Galnt10
Tnks	3.51E-100	0.400525646	0.641	0.463	7.55E-96	1	Tnks
Copz2	2.91E-99	0.365454207	0.256	0.113	6.25E-95	1	Copz2
Smoc1	2.75E-98	0.373471698	0.487	0.289	5.92E-94	1	Smoc1
Ppp4r1	1.68E-97	0.419083618	0.509	0.331	3.60E-93	1	Ppp4r1
Ahdc1	2.61E-97	0.384864684	0.563	0.371	5.61E-93	1	Ahdc1
Adam191	3.81E-97	0.462847098	0.593	0.394	8.20E-93	1	Adam19
Tfpi	6.46E-97	0.373893658	0.395	0.219	1.39E-92	1	Tfpi
Sparc	1.62E-96	0.370364065	0.385	0.209	3.48E-92	1	Sparc
Dennd1a1	5.24E-96	0.255846171	0.945	0.855	1.13E-91	1	Dennd1a
Soat1	5.79E-96	0.450989404	0.386	0.218	1.24E-91	1	Soat1
Vasp	2.07E-95	0.400061271	0.424	0.247	4.44E-91	1	Vasp
Stat3	5.57E-95	0.363059534	0.574	0.381	1.20E-90	1	Stat3
Cfap20	2.27E-94	0.393773193	0.301	0.149	4.88E-90	1	Cfap20
Baiap2	3.42E-93	0.397119818	0.399	0.226	7.37E-89	1	Baiap2
Zbtb10	6.22E-93	0.392373834	0.549	0.366	1.34E-88	1	Zbtb10
Gnai2	7.49E-93	0.399388846	0.449	0.273	1.61E-88	1	Gnai2
Hk1	2.29E-92	0.405020357	0.292	0.144	4.92E-88	1	Hk1
Cerk	3.76E-92	0.343316804	0.289	0.138	8.09E-88	1	Cerk
Psd41	1.31E-90	0.364717355	0.389	0.216	2.81E-86	1	Psd4
Psip1	1.42E-90	0.370163734	0.419	0.244	3.06E-86	1	Psip1
Chsy1	3.05E-90	0.32465256	0.492	0.291	6.55E-86	1	Chsy1
Rasa2	1.80E-89	0.386926039	0.545	0.37	3.88E-85	1	Rasa2
Tshz1	3.28E-89	0.404975528	0.347	0.188	7.05E-85	1	Tshz1
Slc4a7	1.83E-88	0.407398661	0.311	0.16	3.93E-84	1	Slc4a7
Rgl11	8.71E-87	0.413452524	0.554	0.379	1.87E-82	1	Rgl1
Ptk2	2.42E-86	0.290523764	0.855	0.735	5.22E-82	1	Ptk2
Elovl5	2.82E-86	0.338377961	0.416	0.237	6.08E-82	1	Elovl5
Bcat1	1.26E-85	0.353149161	0.382	0.21	2.70E-81	1	Bcat1
Ift43	1.26E-85	0.378970432	0.514	0.342	2.70E-81	1	Ift43
Tpst21	3.11E-84	0.365467155	0.413	0.245	6.70E-80	1	Tpst2
Kctd17	3.48E-84	0.357450471	0.302	0.155	7.49E-80	1	Kctd17
Nr2f2	8.22E-84	0.359930877	0.365	0.202	1.77E-79	1	Nr2f2
Irf2	4.47E-83	0.340003703	0.568	0.388	9.63E-79	1	Irf2
Rabgap1l	5.86E-82	0.434424735	0.663	0.492	1.26E-77	1	Rabgap1l
Gm20696	1.76E-81	0.361131929	0.288	0.144	3.79E-77	1	Gm20696
Kif2a	3.90E-81	0.371481187	0.494	0.325	8.40E-77	1	Kif2a
Lrrc8c	1.49E-80	0.276121672	0.525	0.324	3.21E-76	1	Lrrc8c
Mkl11	2.13E-80	0.291662638	0.778	0.611	4.59E-76	1	Mkl1
Ulk2	2.66E-80	0.364556292	0.506	0.337	5.72E-76	1	Ulk2
Gramd2	3.36E-79	0.358568859	0.26	0.127	7.22E-75	1	Gramd2
Fn1	1.48E-78	0.309284511	0.792	0.633	3.19E-74	1	Fn1
Ptpn14	8.38E-78	0.300958827	0.415	0.241	1.80E-73	1	Ptpn14
Slc7a8	8.46E-78	0.332792374	0.346	0.193	1.82E-73	1	Slc7a8
Slc6a61	1.17E-77	0.383966504	0.58	0.413	2.51E-73	1	Slc6a6
Cabin1	5.02E-77	0.396694251	0.458	0.303	1.08E-72	1	Cabin1
Pex141	5.49E-77	0.254676665	0.832	0.665	1.18E-72	1	Pex14
Cntrl	7.36E-77	0.346699017	0.3	0.16	1.58E-72	1	Cntrl
Tmcc1	1.79E-76	0.349016933	0.75	0.622	3.84E-72	1	Tmcc1
Ccnl21	1.84E-76	0.337061743	0.648	0.492	3.95E-72	1	Ccnl2
Atrx	3.21E-76	0.297007481	0.713	0.561	6.89E-72	1	Atrx
Nrip1	4.70E-76	0.423012166	0.715	0.57	1.01E-71	1	Nrip1
Mpdz	6.07E-76	0.33134822	0.319	0.174	1.31E-71	1	Mpdz
Anxa7	1.38E-75	0.364910606	0.371	0.221	2.97E-71	1	Anxa7
Slc30a7	1.82E-75	0.340409623	0.469	0.301	3.91E-71	1	Slc30a7
Epb41l2	3.40E-75	0.329723772	0.636	0.462	7.31E-71	1	Epb41l2
Pdlim5	7.14E-75	0.348783894	0.688	0.54	1.54E-70	1	Pdlim5
Znrf1	1.87E-74	0.308017774	0.576	0.4	4.02E-70	1	Znrf1
Cep164	6.06E-74	0.345735011	0.445	0.285	1.30E-69	1	Cep164
Zfp5681	8.84E-74	0.335886056	0.513	0.346	1.90E-69	1	Zfp568
Abl2	1.80E-73	0.321407035	0.639	0.481	3.88E-69	1	Abl2
Tbc1d22b	4.17E-73	0.337606304	0.336	0.19	8.97E-69	1	Tbc1d22b
Rnf169	1.23E-72	0.325541365	0.536	0.37	2.65E-68	1	Rnf169
Ezr	1.40E-72	0.413704736	0.446	0.289	3.00E-68	1	Ezr
Slc7a71	5.92E-72	0.329599279	0.265	0.135	1.27E-67	1	Slc7a7
Sec24d	6.96E-72	0.316833278	0.427	0.263	1.50E-67	1	Sec24d
Ptpra	2.85E-71	0.333212013	0.534	0.374	6.13E-67	1	Ptpra
Dpy19l1	3.22E-71	0.303678518	0.284	0.149	6.93E-67	1	Dpy19l1
Ssh1	5.57E-71	0.381931548	0.329	0.189	1.20E-66	1	Ssh1
Flna	5.90E-71	0.322010768	0.294	0.157	1.27E-66	1	Flna
C1galt1	1.37E-70	0.347588604	0.36	0.214	2.95E-66	1	C1galt1
Frk	1.61E-70	0.312279266	0.309	0.169	3.47E-66	1	Frk
Fat1	3.66E-70	0.315895963	0.511	0.343	7.88E-66	1	Fat1
Traf7	5.03E-70	0.326415571	0.328	0.188	1.08E-65	1	Traf7
Elovl6	8.32E-70	0.405867896	0.406	0.253	1.79E-65	1	Elovl6
Glud1	1.31E-69	0.366066813	0.368	0.223	2.82E-65	1	Glud1
Gnai3	1.70E-67	0.366314141	0.493	0.345	3.67E-63	1	Gnai3
Smad7	3.51E-67	0.317670748	0.482	0.325	7.55E-63	1	Smad7
Ap3b1	3.06E-66	0.267159098	0.785	0.643	6.58E-62	1	Ap3b1
Plekhg2	4.39E-65	0.327436414	0.397	0.25	9.44E-61	1	Plekhg2
Gga2	1.38E-64	0.290029686	0.454	0.296	2.98E-60	1	Gga2
Sh3bp4	2.30E-64	0.321001946	0.319	0.181	4.94E-60	1	Sh3bp4
Tram2	1.98E-63	0.264940644	0.403	0.247	4.25E-59	1	Tram2
Ryk	3.01E-63	0.368661189	0.394	0.256	6.47E-59	1	Ryk
Colgalt1	6.56E-63	0.31593912	0.31	0.179	1.41E-58	1	Colgalt1
Carm1	1.24E-62	0.30168746	0.463	0.313	2.67E-58	1	Carm1
Map4k3	1.57E-62	0.256040646	0.712	0.561	3.38E-58	1	Map4k3
P4ha1	1.74E-62	0.300437313	0.38	0.237	3.73E-58	1	P4ha1
Oaf	2.99E-62	0.295770213	0.279	0.153	6.44E-58	1	Oaf
Il6st	3.37E-62	0.337811272	0.381	0.24	7.25E-58	1	Il6st
Sqstm1	1.41E-61	0.339178594	0.409	0.269	3.03E-57	1	Sqstm1
Ptpn11	3.37E-61	0.29521476	0.407	0.263	7.25E-57	1	Ptpn11
Tpk1	5.37E-61	0.322851814	0.42	0.276	1.16E-56	1	Tpk1
Wipf3	1.65E-60	0.324855908	0.274	0.152	3.55E-56	1	Wipf3
Ubl3	7.04E-60	0.31069773	0.372	0.232	1.51E-55	1	Ubl3
Stx21	1.81E-59	0.296891578	0.26	0.142	3.89E-55	1	Stx2
Snx71	2.11E-58	0.307303777	0.363	0.228	4.54E-54	1	Snx7
Acsl4	2.16E-58	0.30421592	0.374	0.237	4.64E-54	1	Acsl4
Elf2	2.34E-58	0.270990515	0.554	0.4	5.03E-54	1	Elf2
Kmt2a	4.55E-58	0.27168104	0.682	0.546	9.79E-54	1	Kmt2a
Zfp667	5.88E-58	0.27612178	0.256	0.139	1.27E-53	1	Zfp667
Arhgef2	9.76E-58	0.297744081	0.351	0.215	2.10E-53	1	Arhgef2
Ammecr1	1.78E-57	0.30672166	0.328	0.198	3.84E-53	1	Ammecr1
Aff4	3.37E-57	0.291998934	0.63	0.5	7.25E-53	1	Aff4
Wwp11	4.45E-57	0.29816633	0.544	0.4	9.56E-53	1	Wwp1
Crtc3	4.89E-57	0.269484591	0.507	0.356	1.05E-52	1	Crtc3
Rab3ip	7.42E-57	0.320824981	0.37	0.237	1.60E-52	1	Rab3ip
Lrrc4	1.43E-56	0.338760682	0.342	0.214	3.09E-52	1	Lrrc4
Trim26	5.14E-56	0.321841909	0.389	0.256	1.11E-51	1	Trim26
Pik3cb1	5.72E-56	0.264970054	0.602	0.447	1.23E-51	1	Pik3cb
Naa16	9.86E-56	0.304012089	0.449	0.311	2.12E-51	1	Naa16
Dopey2	1.35E-55	0.306088142	0.27	0.154	2.91E-51	1	Dopey2
Bcar1	1.69E-55	0.306509837	0.327	0.202	3.63E-51	1	Bcar1
Itgav	1.80E-55	0.251840779	0.514	0.364	3.86E-51	1	Itgav
Tinagl11	1.00E-54	0.343513911	0.252	0.141	2.15E-50	1	Tinagl1
Cited2	3.49E-54	0.298879298	0.324	0.197	7.50E-50	1	Cited2
Gan	5.42E-54	0.314925901	0.252	0.142	1.17E-49	1	Gan
Ubr2	1.35E-53	0.294017825	0.555	0.422	2.90E-49	1	Ubr2
Wbp1l	3.22E-53	0.29297024	0.514	0.377	6.92E-49	1	Wbp1l
Jup	4.94E-53	0.278748674	0.451	0.309	1.06E-48	1	Jup
Src	9.75E-53	0.290607512	0.346	0.218	2.10E-48	1	Src
Anapc5	5.30E-52	0.264115401	0.422	0.284	1.14E-47	1	Anapc5
Stx8	1.90E-51	0.256018123	0.644	0.51	4.09E-47	1	Stx8
Mon2	2.79E-51	0.295979071	0.448	0.316	5.99E-47	1	Mon2
Atp9a	6.69E-51	0.304139333	0.367	0.24	1.44E-46	1	Atp9a
Tbrg1	2.44E-50	0.266894627	0.359	0.232	5.24E-46	1	Tbrg1
Sgsm21	5.21E-50	0.299873306	0.253	0.146	1.12E-45	1	Sgsm2
Tead41	6.97E-50	0.313775444	0.44	0.308	1.50E-45	1	Tead4
Egln1	7.49E-50	0.327789025	0.307	0.191	1.61E-45	1	Egln1
Mfhas1	7.72E-50	0.272468477	0.306	0.185	1.66E-45	1	Mfhas1
Ust	8.77E-50	0.28786867	0.263	0.15	1.89E-45	1	Ust
Klhl22	3.84E-49	0.269061084	0.514	0.38	8.26E-45	1	Klhl22
Zfp64	7.00E-49	0.262156503	0.478	0.336	1.51E-44	1	Zfp64
Dap1	1.58E-47	0.262833964	0.347	0.225	3.40E-43	1	Dap
Lgals1	7.00E-47	0.269552307	0.257	0.151	1.51E-42	1	Lgals1
Fscn1	8.43E-47	0.295301292	0.287	0.176	1.81E-42	1	Fscn1
Abl1	4.39E-46	0.268446385	0.522	0.392	9.45E-42	1	Abl1
Srebf2	1.38E-45	0.301285462	0.352	0.234	2.97E-41	1	Srebf2
Arid3a	9.76E-45	0.259315271	0.427	0.3	2.10E-40	1	Arid3a
Supt20	1.45E-44	0.267543283	0.511	0.39	3.11E-40	1	Supt20
Cuedc11	1.82E-44	0.25973492	0.395	0.269	3.91E-40	1	Cuedc1
Actr3	2.94E-44	0.25290245	0.551	0.436	6.32E-40	1	Actr3
Wdr44	4.27E-43	0.28917376	0.291	0.185	9.19E-39	1	Wdr44
Hnrnpk	8.66E-43	0.258040436	0.509	0.389	1.86E-38	1	Hnrnpk
Gata3	1.08E-42	0.274689369	0.335	0.223	2.33E-38	1	Gata3
Arhgap8	5.17E-42	0.279396682	0.257	0.155	1.11E-37	1	Arhgap8
Nub1	5.00E-41	0.257494243	0.39	0.274	1.08E-36	1	Nub1
Bckdhb	1.12E-40	0.265372618	0.362	0.247	2.41E-36	1	Bckdhb
Slc2a11	1.25E-40	0.306149808	0.459	0.336	2.70E-36	1	Slc2a1
Gys1	2.68E-38	0.270789018	0.419	0.31	5.76E-34	1	Gys1
Stx12	5.07E-37	0.264045162	0.357	0.251	1.09E-32	1	Stx12
Akap7	8.30E-36	0.252729583	0.306	0.204	1.78E-31	1	Akap7
Prl7d1	1.82E-34	0.46538003	0.294	0.202	3.91E-30	1	Prl7d1
Stau2	1.02E-29	0.257941645	0.327	0.238	2.20E-25	1	Stau2
Pnpt1	2.76E-25	0.292892257	0.377	0.294	5.93E-21	1	Pnpt1
Prex1	4.82E-20	0.372602896	0.3	0.236	1.04E-15	1	Prex1
Serpine21	1.79E-18	0.29635224	0.288	0.218	3.85E-14	1	Serpine2
Prune21	0	1.316827214	0.962	0.521	0	2	Prune2
Ppp2r2c1	0	1.282415805	0.795	0.23	0	2	Ppp2r2c
Tiam11	0	1.138048777	0.882	0.417	0	2	Tiam1
Tmem132e1	0	1.131607726	0.538	0.117	0	2	Tmem132e
1500009L16Rik1	0	1.078477498	0.545	0.146	0	2	1500009L16Rik
Sgpp21	0	1.074407219	0.638	0.213	0	2	Sgpp2
Rab8b1	0	1.032232894	0.741	0.329	0	2	Rab8b
Chsy11	0	0.914519901	0.651	0.28	0	2	Chsy1
Fam168a1	0	0.882314149	0.916	0.603	0	2	Fam168a
Anxa111	0	0.875621506	0.8	0.398	0	2	Anxa11
Pde4dip1	0	0.872720211	0.819	0.455	0	2	Pde4dip
Actn11	0	0.852954939	0.782	0.413	0	2	Actn1
Tiam21	0	0.841014587	0.668	0.314	0	2	Tiam2
Ncam11	0	0.839477663	0.841	0.513	0	2	Ncam1
Trio1	0	0.828212688	0.947	0.698	0	2	Trio
Cdhr51	0	0.827319207	0.412	0.116	0	2	Cdhr5
Itga9	0	0.821081867	0.51	0.185	0	2	Itga9
Sdk2	0	0.820166475	0.59	0.225	0	2	Sdk2
Fam78b1	0	0.805196774	0.75	0.414	0	2	Fam78b
Rffl1	0	0.746017085	0.835	0.555	0	2	Rffl
Basp11	0	0.697185438	0.909	0.66	0	2	Basp1
Dst1	0	0.689991447	0.98	0.818	0	2	Dst
Sfmbt2	0	0.615182446	0.97	0.801	0	2	Sfmbt2
Gm47283	0	0.564590946	0.981	0.861	0	2	Gm47283
Sema3e1	2.37E-297	0.808470671	0.71	0.378	5.10E-293	2	Sema3e
Sema4d1	5.57E-288	0.770481766	0.66	0.334	1.20E-283	2	Sema4d
Adgrg61	8.13E-288	0.739162595	0.739	0.408	1.75E-283	2	Adgrg6
Gfod11	1.38E-286	0.748228758	0.688	0.341	2.97E-282	2	Gfod1
Gm26917	6.49E-285	0.44173603	0.997	0.94	1.40E-280	2	Gm26917
Palm1	1.00E-283	0.770585088	0.594	0.273	2.15E-279	2	Palm
Pitrm11	4.54E-283	0.78097228	0.613	0.294	9.77E-279	2	Pitrm1
Cald11	3.81E-281	0.571188205	0.927	0.736	8.19E-277	2	Cald1
Ano61	7.02E-279	0.655463913	0.848	0.575	1.51E-274	2	Ano6
Gm383991	6.34E-271	0.76867392	0.644	0.322	1.36E-266	2	Gm38399
Lgals91	2.48E-269	0.699820041	0.722	0.403	5.34E-265	2	Lgals9
Adcy71	6.86E-268	0.709617743	0.714	0.382	1.48E-263	2	Adcy7
Mpzl11	7.03E-268	0.731741996	0.769	0.505	1.51E-263	2	Mpzl1
Mgat51	2.16E-265	0.663550151	0.841	0.58	4.65E-261	2	Mgat5
Ntn11	9.28E-258	0.855830648	0.442	0.164	2.00E-253	2	Ntn1
Lrrc8c1	2.66E-256	0.709584114	0.635	0.317	5.72E-252	2	Lrrc8c
Piezo21	1.45E-253	0.65064665	0.594	0.265	3.12E-249	2	Piezo2
Chst111	5.59E-251	0.738322645	0.661	0.338	1.20E-246	2	Chst11
Fstl3	1.79E-245	0.764940834	0.359	0.119	3.84E-241	2	Fstl3
Tcf201	2.71E-242	0.486395133	0.955	0.799	5.83E-238	2	Tcf20
Nav3	6.50E-242	0.733029857	0.58	0.286	1.40E-237	2	Nav3
Dock11	1.09E-241	0.594874779	0.882	0.68	2.34E-237	2	Dock1
Snd11	7.43E-241	0.516447361	0.948	0.845	1.60E-236	2	Snd1
Gm42418	6.94E-236	0.331158733	1	1	1.49E-231	2	Gm42418
Rassf4	1.22E-232	0.612906776	0.258	0.066	2.62E-228	2	Rassf4
Rtn1	1.67E-232	0.671744994	0.711	0.413	3.59E-228	2	Rtn1
Etl4	1.86E-227	0.4691903	0.96	0.823	4.00E-223	2	Etl4
Gng12	1.41E-226	0.570160715	0.878	0.68	3.04E-222	2	Gng12
Ncmap1	9.33E-224	0.706902274	0.4	0.15	2.01E-219	2	Ncmap
Gna141	1.04E-222	0.653476508	0.581	0.277	2.24E-218	2	Gna14
Srgap21	3.82E-221	0.598331416	0.812	0.585	8.21E-217	2	Srgap2
Coro2a1	1.35E-220	0.705401499	0.415	0.16	2.90E-216	2	Coro2a
Fat11	1.46E-220	0.687287701	0.617	0.335	3.15E-216	2	Fat1
P3h21	5.48E-220	0.658871366	0.572	0.273	1.18E-215	2	P3h2
Grb21	1.13E-219	0.625694509	0.776	0.545	2.43E-215	2	Grb2
Sct1	1.57E-213	0.725349777	0.57	0.294	3.38E-209	2	Sct
Arhgap221	3.66E-210	0.695300584	0.537	0.261	7.87E-206	2	Arhgap22
Car21	2.26E-205	0.631137637	0.61	0.326	4.85E-201	2	Car2
Nav11	7.35E-203	0.606453285	0.75	0.492	1.58E-198	2	Nav1
Vav2	3.15E-201	0.648422522	0.584	0.309	6.77E-197	2	Vav2
Bcar31	2.14E-199	0.542216989	0.79	0.515	4.61E-195	2	Bcar3
Plac1	1.02E-195	0.540844519	0.755	0.471	2.20E-191	2	Plac1
Hpcal11	3.89E-194	0.620348705	0.6	0.318	8.37E-190	2	Hpcal1
Etv61	1.77E-192	0.618830565	0.838	0.664	3.81E-188	2	Etv6
Nostrin1	2.71E-192	0.65935408	0.49	0.23	5.83E-188	2	Nostrin
Rps6ka21	7.53E-191	0.661466255	0.493	0.233	1.62E-186	2	Rps6ka2
Pxn1	1.16E-187	0.670240172	0.612	0.361	2.50E-183	2	Pxn
Pvt1	1.77E-186	0.652851855	0.601	0.326	3.80E-182	2	Pvt1
Arid5b1	7.37E-184	0.449654975	0.949	0.811	1.59E-179	2	Arid5b
Mid1	9.62E-184	0.622362663	0.733	0.517	2.07E-179	2	Mid1
Smoc11	5.29E-179	0.625292101	0.547	0.287	1.14E-174	2	Smoc1
Nr2f21	9.81E-179	0.68969069	0.432	0.199	2.11E-174	2	Nr2f2
Elovl51	1.90E-176	0.619197279	0.482	0.234	4.09E-172	2	Elovl5
Liph1	3.35E-174	0.630460108	0.378	0.158	7.22E-170	2	Liph
Pou2f3	2.30E-169	0.604851685	0.253	0.08	4.94E-165	2	Pou2f3
Iffo11	1.82E-167	0.609359113	0.311	0.115	3.91E-163	2	Iffo1
Pard6g2	9.71E-167	0.590663635	0.624	0.366	2.09E-162	2	Pard6g
Ccser11	2.28E-166	0.485595174	0.796	0.568	4.91E-162	2	Ccser1
Cmss1	1.60E-164	0.439060447	0.928	0.843	3.43E-160	2	Cmss1
Afap1l21	3.62E-163	0.494859158	0.824	0.58	7.79E-159	2	Afap1l2
Klhl131	1.27E-160	0.583756576	0.803	0.602	2.74E-156	2	Klhl13
Prex21	5.55E-159	0.498754991	0.627	0.362	1.19E-154	2	Prex2
Hspg22	8.99E-158	0.491731272	0.784	0.548	1.93E-153	2	Hspg2
Mthfd1l	1.73E-155	0.591572326	0.573	0.33	3.72E-151	2	Mthfd1l
Frmd4a1	8.55E-155	0.37849224	0.816	0.575	1.84E-150	2	Frmd4a
E2f3	5.12E-154	0.588665221	0.65	0.422	1.10E-149	2	E2f3
Sep-91	7.98E-152	0.444400793	0.844	0.627	1.72E-147	2	9-Sep
Rai1	1.64E-151	0.608997839	0.592	0.363	3.52E-147	2	Rai1
Braf1	2.82E-149	0.456736137	0.816	0.675	6.07E-145	2	Braf
Fam83b1	3.57E-145	0.608784229	0.368	0.166	7.67E-141	2	Fam83b
Cgnl1	5.95E-143	0.528847472	0.698	0.474	1.28E-138	2	Cgnl1
Myh91	8.02E-140	0.405508766	0.911	0.789	1.72E-135	2	Myh9
Tnfaip81	2.16E-134	0.427194698	0.61	0.368	4.65E-130	2	Tnfaip8
Myo18a	1.94E-133	0.467300595	0.778	0.578	4.17E-129	2	Myo18a
Mast41	4.89E-133	0.487342253	0.78	0.587	1.05E-128	2	Mast4
Ptprf1	2.43E-130	0.556029791	0.449	0.235	5.23E-126	2	Ptprf
Arpc1b1	1.01E-128	0.540238336	0.527	0.312	2.17E-124	2	Arpc1b
Cdh51	1.14E-127	0.533780966	0.515	0.301	2.46E-123	2	Cdh5
Rap1a1	5.48E-124	0.47481381	0.685	0.5	1.18E-119	2	Rap1a
Nckap5l1	1.43E-119	0.52685571	0.31	0.135	3.07E-115	2	Nckap5l
Cdh4	2.08E-119	0.501503861	0.311	0.132	4.47E-115	2	Cdh4
Pdzrn3	2.30E-119	0.488374052	0.54	0.314	4.96E-115	2	Pdzrn3
Ahdc11	8.87E-118	0.507026179	0.575	0.373	1.91E-113	2	Ahdc1
Zfp641	2.48E-117	0.542118432	0.532	0.333	5.33E-113	2	Zfp64
Taf15	4.58E-114	0.449185202	0.711	0.555	9.84E-110	2	Taf15
Tfap2c1	7.12E-112	0.514974175	0.49	0.295	1.53E-107	2	Tfap2c
Phf201	7.95E-112	0.454204624	0.743	0.597	1.71E-107	2	Phf20
Nsd2	2.30E-111	0.456146904	0.67	0.487	4.95E-107	2	Nsd2
Wnk2	9.10E-111	0.528711668	0.374	0.187	1.96E-106	2	Wnk2
Sh3pxd2a1	6.21E-110	0.401778673	0.791	0.601	1.34E-105	2	Sh3pxd2a
Arhgap231	4.93E-109	0.443404169	0.735	0.569	1.06E-104	2	Arhgap23
Jazf12	2.30E-108	0.424302422	0.766	0.573	4.95E-104	2	Jazf1
Parva1	3.25E-108	0.346439139	0.867	0.691	6.99E-104	2	Parva
Pip4k2a	8.44E-107	0.445959049	0.539	0.328	1.82E-102	2	Pip4k2a
Arntl1	1.22E-105	0.536866332	0.415	0.226	2.62E-101	2	Arntl
Brpf31	1.14E-104	0.489171975	0.552	0.364	2.45E-100	2	Brpf3
Nek61	2.26E-103	0.505022716	0.429	0.24	4.87E-99	2	Nek6
Frmd4b1	8.59E-103	0.359054692	0.676	0.464	1.85E-98	2	Frmd4b
Elovl61	1.32E-101	0.524759134	0.441	0.252	2.84E-97	2	Elovl6
Xylt11	4.17E-101	0.254539166	0.652	0.415	8.97E-97	2	Xylt1
Ralbp11	5.55E-101	0.394407506	0.681	0.498	1.19E-96	2	Ralbp1
Fryl1	1.17E-99	0.393365685	0.735	0.583	2.52E-95	2	Fryl
Rap1gap1	1.56E-99	0.48482476	0.276	0.123	3.36E-95	2	Rap1gap
Il6st1	4.98E-99	0.51143749	0.413	0.239	1.07E-94	2	Il6st
Tpm11	5.20E-99	0.402041072	0.69	0.521	1.12E-94	2	Tpm1
Bcat11	6.89E-99	0.502408901	0.394	0.211	1.48E-94	2	Bcat1
Ralgps21	1.44E-98	0.521880173	0.499	0.319	3.10E-94	2	Ralgps2
Slc35d1	1.51E-96	0.493609977	0.305	0.149	3.24E-92	2	Slc35d1
Cdh31	5.60E-96	0.393404671	0.67	0.474	1.21E-91	2	Cdh3
Usp9x	6.79E-96	0.375862198	0.795	0.676	1.46E-91	2	Usp9x
Dyrk21	1.92E-95	0.473649304	0.311	0.153	4.14E-91	2	Dyrk2
Pros11	1.93E-93	0.492150245	0.417	0.244	4.15E-89	2	Pros1
Tmcc32	3.98E-93	0.438982732	0.62	0.435	8.57E-89	2	Tmcc3
Agap31	3.54E-92	0.48456322	0.475	0.301	7.62E-88	2	Agap3
Klf131	1.05E-91	0.473223345	0.559	0.38	2.26E-87	2	Klf13
Hdac41	1.70E-91	0.385276485	0.706	0.534	3.67E-87	2	Hdac4
Capn151	1.76E-91	0.466221704	0.562	0.39	3.79E-87	2	Capn15
Slco3a11	8.03E-91	0.490322833	0.457	0.267	1.73E-86	2	Slco3a1
Syde11	8.36E-91	0.478563036	0.304	0.15	1.80E-86	2	Syde1
Gphn	2.09E-90	0.386365164	0.797	0.689	4.49E-86	2	Gphn
Hic21	2.29E-90	0.464718369	0.554	0.382	4.93E-86	2	Hic2
Mcph1	8.97E-90	0.436813336	0.597	0.414	1.93E-85	2	Mcph1
Chdh	1.03E-89	0.4637248	0.258	0.118	2.21E-85	2	Chdh
Frmpd11	1.76E-88	0.4280183	0.437	0.256	3.79E-84	2	Frmpd1
Dnmt3a	2.73E-88	0.391887913	0.727	0.559	5.88E-84	2	Dnmt3a
Cep1641	3.93E-88	0.46208259	0.457	0.286	8.45E-84	2	Cep164
Mical31	2.05E-87	0.308281129	0.834	0.662	4.41E-83	2	Mical3
Tmeff11	2.92E-87	0.469735362	0.463	0.288	6.28E-83	2	Tmeff1
Cecr2	3.33E-87	0.485326107	0.414	0.243	7.16E-83	2	Cecr2
Dennd1a2	1.94E-86	0.274989664	0.927	0.857	4.18E-82	2	Dennd1a
Gpat31	1.35E-84	0.494645224	0.288	0.142	2.91E-80	2	Gpat3
Map4k41	2.26E-84	0.343673731	0.826	0.715	4.87E-80	2	Map4k4
Myo10	6.51E-83	0.289016128	0.723	0.567	1.40E-78	2	Myo10
Rnf1571	1.04E-81	0.450302365	0.355	0.197	2.24E-77	2	Rnf157
Anxa42	1.84E-81	0.300010502	0.723	0.532	3.95E-77	2	Anxa4
Hmga2	5.78E-81	0.436718828	0.282	0.135	1.24E-76	2	Hmga2
Taco1	8.12E-81	0.505641092	0.542	0.377	1.75E-76	2	Taco1
Hs2st1	6.06E-80	0.459436968	0.559	0.402	1.30E-75	2	Hs2st1
Gnaq1	4.23E-79	0.288653812	0.906	0.836	9.09E-75	2	Gnaq
Tex21	8.74E-78	0.4121072	0.631	0.475	1.88E-73	2	Tex2
Ippk	3.11E-77	0.446934382	0.418	0.262	6.69E-73	2	Ippk
Dnm21	3.27E-77	0.354956932	0.757	0.623	7.03E-73	2	Dnm2
Kcnq1ot1	3.40E-77	0.30035535	0.918	0.852	7.32E-73	2	Kcnq1ot1
Taf1d	4.30E-77	0.430555717	0.497	0.335	9.24E-73	2	Taf1d
Gm28285	2.15E-76	0.427838983	0.276	0.137	4.62E-72	2	Gm28285
Wipf11	8.09E-76	0.40408744	0.606	0.433	1.74E-71	2	Wipf1
Cdyl	1.14E-75	0.371572619	0.685	0.545	2.45E-71	2	Cdyl
Usp71	1.71E-74	0.358477188	0.709	0.573	3.68E-70	2	Usp7
G3bp1	2.34E-74	0.417764551	0.505	0.351	5.04E-70	2	G3bp1
Arhgef111	6.08E-74	0.381151458	0.667	0.534	1.31E-69	2	Arhgef11
Tbc1d81	1.19E-73	0.446233738	0.332	0.185	2.55E-69	2	Tbc1d8
Gsn	1.38E-73	0.466670219	0.355	0.211	2.97E-69	2	Gsn
Clic4	2.04E-72	0.365044268	0.706	0.579	4.38E-68	2	Clic4
Als2cl1	5.87E-72	0.42079231	0.285	0.149	1.26E-67	2	Als2cl
Xpo1	9.09E-72	0.363195911	0.656	0.525	1.96E-67	2	Xpo1
Rlim	1.08E-71	0.431677709	0.545	0.412	2.33E-67	2	Rlim
Cfdp1	2.18E-71	0.397929341	0.614	0.486	4.70E-67	2	Cfdp1
Pde8a1	4.40E-70	0.437899133	0.432	0.276	9.47E-66	2	Pde8a
Uck2	5.48E-70	0.467688925	0.383	0.234	1.18E-65	2	Uck2
Prim2	1.32E-69	0.401735256	0.546	0.394	2.85E-65	2	Prim2
Mical21	3.00E-69	0.411252475	0.437	0.28	6.46E-65	2	Mical2
Actr21	6.26E-69	0.378886911	0.62	0.493	1.35E-64	2	Actr2
Nin1	1.19E-68	0.42337533	0.421	0.272	2.57E-64	2	Nin
Xist	3.43E-68	0.371554907	0.644	0.506	7.38E-64	2	Xist
Adgrl11	7.72E-68	0.375680101	0.269	0.138	1.66E-63	2	Adgrl1
Snx92	9.05E-68	0.334556798	0.736	0.611	1.95E-63	2	Snx9
Pex142	9.23E-68	0.28290787	0.804	0.67	1.98E-63	2	Pex14
Cbx72	4.43E-67	0.302031411	0.752	0.571	9.53E-63	2	Cbx7
Stag3	3.69E-66	0.442855475	0.278	0.151	7.94E-62	2	Stag3
Cdc14a	6.88E-66	0.394852133	0.306	0.171	1.48E-61	2	Cdc14a
Pstpip11	1.33E-65	0.400696156	0.319	0.183	2.85E-61	2	Pstpip1
Shroom4	3.01E-65	0.263577705	0.754	0.615	6.47E-61	2	Shroom4
Ptbp31	5.43E-65	0.319014202	0.792	0.706	1.17E-60	2	Ptbp3
Pltp	6.69E-65	0.421690873	0.254	0.132	1.44E-60	2	Pltp
Atrx1	3.36E-64	0.339764885	0.684	0.566	7.22E-60	2	Atrx
Acin1	5.42E-64	0.341831269	0.682	0.572	1.17E-59	2	Acin1
Taf1	6.89E-64	0.415489341	0.513	0.378	1.48E-59	2	Taf1
Map4	4.04E-63	0.311199302	0.784	0.692	8.69E-59	2	Map4
Ranbp17	2.31E-62	0.323480701	0.539	0.383	4.97E-58	2	Ranbp17
Ube2o	3.63E-62	0.340098538	0.546	0.392	7.80E-58	2	Ube2o
Sulf21	1.19E-61	0.42455361	0.276	0.15	2.56E-57	2	Sulf2
Hip1r1	2.14E-61	0.433669245	0.304	0.177	4.60E-57	2	Hip1r
Raf11	2.54E-61	0.380389479	0.546	0.418	5.47E-57	2	Raf1
Klhl221	2.88E-61	0.38352671	0.516	0.382	6.19E-57	2	Klhl22
Hivep11	5.93E-61	0.404922319	0.412	0.267	1.28E-56	2	Hivep1
Satb1	1.93E-60	0.385780102	0.303	0.168	4.15E-56	2	Satb1
Mki67	3.21E-60	0.330013676	0.38	0.23	6.90E-56	2	Mki67
Luzp11	1.31E-59	0.315479993	0.747	0.639	2.81E-55	2	Luzp1
Frk1	1.46E-59	0.417585684	0.298	0.171	3.13E-55	2	Frk
Slc10a7	3.79E-59	0.348711399	0.627	0.506	8.15E-55	2	Slc10a7
Zbtb101	4.48E-59	0.381748642	0.504	0.372	9.63E-55	2	Zbtb10
Lasp11	5.10E-59	0.387913164	0.507	0.372	1.10E-54	2	Lasp1
Serpine22	1.07E-58	0.39570201	0.349	0.213	2.30E-54	2	Serpine2
Fubp31	1.32E-58	0.410390178	0.425	0.293	2.83E-54	2	Fubp3
Gbe11	3.40E-58	0.38488247	0.444	0.307	7.32E-54	2	Gbe1
Psip11	4.36E-58	0.395530292	0.381	0.25	9.37E-54	2	Psip1
Pkig	1.79E-56	0.388500353	0.457	0.322	3.85E-52	2	Pkig
Mpp6	5.72E-56	0.388107291	0.333	0.204	1.23E-51	2	Mpp6
Hat1	1.37E-55	0.3779355	0.403	0.266	2.96E-51	2	Hat1
Dyrk1a	1.08E-54	0.31472683	0.71	0.618	2.33E-50	2	Dyrk1a
Dapk11	1.26E-54	0.307929559	0.701	0.563	2.71E-50	2	Dapk1
C1galt11	3.49E-54	0.40626585	0.342	0.218	7.51E-50	2	C1galt1
Sipa1l1	1.34E-53	0.275471156	0.735	0.6	2.88E-49	2	Sipa1l1
Senp1	1.66E-53	0.348369952	0.461	0.327	3.56E-49	2	Senp1
Igf2bp3	2.46E-53	0.364111154	0.543	0.408	5.30E-49	2	Igf2bp3
Kctd171	7.41E-53	0.380376606	0.274	0.16	1.59E-48	2	Kctd17
Zwilch	8.11E-53	0.343763168	0.278	0.158	1.74E-48	2	Zwilch
Hjurp	1.15E-52	0.331233877	0.452	0.316	2.48E-48	2	Hjurp
Tshz11	1.47E-52	0.413249311	0.313	0.193	3.15E-48	2	Tshz1
Map2k11	1.60E-52	0.299256252	0.661	0.552	3.44E-48	2	Map2k1
Fam126a1	4.90E-52	0.359805778	0.395	0.263	1.05E-47	2	Fam126a
Itpr1	8.34E-52	0.303138038	0.516	0.377	1.79E-47	2	Itpr1
Carm11	9.08E-52	0.382957109	0.439	0.317	1.95E-47	2	Carm1
Pacsin21	1.88E-51	0.333985055	0.583	0.455	4.05E-47	2	Pacsin2
Med14	4.41E-51	0.392773178	0.318	0.198	9.49E-47	2	Med14
Tpm41	4.87E-51	0.35056289	0.502	0.379	1.05E-46	2	Tpm4
Ncl	7.64E-51	0.376191169	0.404	0.278	1.64E-46	2	Ncl
Myo1e1	1.24E-50	0.287286105	0.689	0.556	2.67E-46	2	Myo1e
Pds5a	1.79E-50	0.275628541	0.741	0.659	3.84E-46	2	Pds5a
Zdhhc81	1.41E-49	0.381386811	0.272	0.162	3.03E-45	2	Zdhhc8
Wipf31	2.64E-49	0.380820619	0.265	0.154	5.68E-45	2	Wipf3
Ezh2	2.86E-49	0.373160602	0.433	0.307	6.16E-45	2	Ezh2
Ftx	7.52E-49	0.35216539	0.447	0.324	1.62E-44	2	Ftx
Dpf31	1.20E-48	0.255822062	0.629	0.469	2.59E-44	2	Dpf3
Hsp90ab1	1.37E-48	0.347140571	0.455	0.33	2.95E-44	2	Hsp90ab1
Nr6a1	2.14E-48	0.314642203	0.684	0.596	4.61E-44	2	Nr6a1
Sqstm11	2.29E-48	0.377952683	0.391	0.273	4.93E-44	2	Sqstm1
Cdc42se21	2.57E-48	0.283924983	0.623	0.499	5.53E-44	2	Cdc42se2
Knl1	8.14E-48	0.323720616	0.297	0.177	1.75E-43	2	Knl1
Myo1d2	8.66E-48	0.303865913	0.65	0.54	1.86E-43	2	Myo1d
Fam171a11	1.18E-47	0.354975999	0.476	0.346	2.54E-43	2	Fam171a1
Tfdp1	4.83E-47	0.360200359	0.438	0.324	1.04E-42	2	Tfdp1
Nid11	5.47E-47	0.282916907	0.476	0.342	1.18E-42	2	Nid1
Mdn1	9.92E-47	0.370323064	0.428	0.314	2.13E-42	2	Mdn1
Lrrc41	2.67E-46	0.399324402	0.329	0.217	5.75E-42	2	Lrrc4
Fhl2	3.18E-46	0.322566056	0.292	0.177	6.84E-42	2	Fhl2
Ubap2	3.41E-46	0.329752346	0.609	0.516	7.34E-42	2	Ubap2
Son	4.03E-46	0.251176404	0.788	0.718	8.67E-42	2	Son
Anp32b	5.26E-46	0.319178329	0.414	0.289	1.13E-41	2	Anp32b
Vps50	5.54E-46	0.379705386	0.336	0.224	1.19E-41	2	Vps50
Rcc1	1.33E-45	0.363612339	0.369	0.254	2.87E-41	2	Rcc1
Hells	2.00E-45	0.334563363	0.29	0.177	4.30E-41	2	Hells
Hnrnpa2b1	4.99E-45	0.280697939	0.661	0.577	1.07E-40	2	Hnrnpa2b1
AY036118	5.26E-45	0.316554954	0.542	0.423	1.13E-40	2	AY036118
Nop56	7.86E-45	0.362320178	0.367	0.251	1.69E-40	2	Nop56
Topbp1	2.77E-44	0.342465258	0.396	0.275	5.97E-40	2	Topbp1
Top2a	7.84E-44	0.25255233	0.379	0.245	1.69E-39	2	Top2a
Cul1	1.05E-43	0.29194871	0.608	0.518	2.26E-39	2	Cul1
Memo1	1.85E-43	0.347798249	0.475	0.37	3.99E-39	2	Memo1
Sdk11	3.04E-43	0.494272008	0.577	0.471	6.54E-39	2	Sdk1
Efnb2	3.57E-43	0.311883865	0.293	0.18	7.68E-39	2	Efnb2
Arpc21	4.23E-43	0.316648395	0.589	0.503	9.10E-39	2	Arpc2
Tram21	5.93E-43	0.33078043	0.37	0.252	1.27E-38	2	Tram2
Plec	7.88E-43	0.294360832	0.486	0.364	1.69E-38	2	Plec
Drosha	1.03E-42	0.350174946	0.38	0.269	2.22E-38	2	Drosha
Inf21	1.04E-42	0.324066503	0.391	0.274	2.23E-38	2	Inf2
Smc4	1.11E-42	0.323687412	0.378	0.259	2.38E-38	2	Smc4
Elf4	2.63E-42	0.312299874	0.361	0.239	5.67E-38	2	Elf4
Arid2	3.46E-42	0.271432321	0.633	0.542	7.45E-38	2	Arid2
Arhgap211	4.10E-42	0.310667809	0.56	0.46	8.82E-38	2	Arhgap21
Trak11	1.79E-41	0.315488534	0.522	0.418	3.85E-37	2	Trak1
Pkm	6.01E-41	0.335971644	0.441	0.337	1.29E-36	2	Pkm
Wdr441	7.26E-41	0.363459754	0.288	0.187	1.56E-36	2	Wdr44
Npm1	1.66E-40	0.336666216	0.372	0.262	3.57E-36	2	Npm1
Clip21	4.10E-40	0.296575558	0.441	0.32	8.82E-36	2	Clip2
Cenpp	4.16E-40	0.255718725	0.45	0.317	8.96E-36	2	Cenpp
Trim6	1.07E-39	0.32497079	0.313	0.207	2.30E-35	2	Trim6
Nasp	5.61E-39	0.30706361	0.295	0.189	1.21E-34	2	Nasp
H2afz	1.25E-38	0.32153848	0.258	0.16	2.68E-34	2	H2afz
Actr31	1.87E-38	0.292423311	0.531	0.439	4.01E-34	2	Actr3
Caprin1	2.58E-38	0.286874599	0.61	0.527	5.55E-34	2	Caprin1
Sri1	3.05E-38	0.340611506	0.342	0.237	6.56E-34	2	Sri
Kdm6b1	3.83E-38	0.33523994	0.309	0.206	8.24E-34	2	Kdm6b
Naa25	4.02E-38	0.319616325	0.315	0.211	8.66E-34	2	Naa25
Atad2	9.00E-38	0.319041319	0.336	0.227	1.94E-33	2	Atad2
Nipa2	1.67E-37	0.34645945	0.401	0.303	3.60E-33	2	Nipa2
Bicdl12	2.41E-37	0.259896476	0.379	0.255	5.19E-33	2	Bicdl1
Kat6b	2.58E-37	0.268433346	0.666	0.596	5.54E-33	2	Kat6b
Ddhd11	2.68E-37	0.322272065	0.304	0.202	5.77E-33	2	Ddhd1
Got2	5.03E-37	0.317005326	0.298	0.198	1.08E-32	2	Got2
Baiap21	7.56E-37	0.329325063	0.337	0.234	1.63E-32	2	Baiap2
Blm	7.68E-37	0.284207548	0.302	0.195	1.65E-32	2	Blm
Serpinb9e1	8.13E-37	0.318538614	0.344	0.237	1.75E-32	2	Serpinb9e
Gnl3	8.88E-37	0.338691163	0.28	0.182	1.91E-32	2	Gnl3
Cdkal1	1.07E-36	0.269976149	0.633	0.553	2.31E-32	2	Cdkal1
H3f3b	1.15E-36	0.353578714	0.356	0.258	2.48E-32	2	H3f3b
Nmt2	1.33E-36	0.305786198	0.426	0.319	2.86E-32	2	Nmt2
Spata5	1.94E-36	0.299206444	0.499	0.402	4.16E-32	2	Spata5
Kpnb1	2.03E-36	0.322857358	0.278	0.182	4.37E-32	2	Kpnb1
Ppp1r12c	3.25E-36	0.336341813	0.347	0.248	7.00E-32	2	Ppp1r12c
Lama51	3.50E-36	0.258241862	0.465	0.352	7.53E-32	2	Lama5
Eif3a	4.29E-36	0.286445396	0.529	0.443	9.23E-32	2	Eif3a
Lars2	5.13E-36	0.282323032	0.532	0.436	1.10E-31	2	Lars2
Mkl12	8.24E-36	0.2575274	0.698	0.621	1.77E-31	2	Mkl1
Elf21	1.07E-35	0.295796093	0.504	0.406	2.30E-31	2	Elf2
Yaf2	2.31E-35	0.323114574	0.453	0.355	4.98E-31	2	Yaf2
Gabpb2	2.93E-35	0.301731957	0.381	0.28	6.30E-31	2	Gabpb2
Dsg2	4.66E-35	0.290813659	0.408	0.3	1.00E-30	2	Dsg2
Ddb11	6.10E-35	0.273004483	0.572	0.483	1.31E-30	2	Ddb1
Kif11	7.86E-35	0.275871054	0.269	0.17	1.69E-30	2	Kif11
S100a61	8.05E-35	0.320178267	0.306	0.209	1.73E-30	2	S100a6
Smarcc1	8.15E-35	0.296855912	0.498	0.408	1.75E-30	2	Smarcc1
Rangap1	1.42E-34	0.32056511	0.332	0.233	3.05E-30	2	Rangap1
Ldlr1	1.85E-34	0.322504509	0.467	0.367	3.99E-30	2	Ldlr
Slc25a13	1.94E-34	0.317315489	0.36	0.257	4.18E-30	2	Slc25a13
Ankrd28	2.39E-34	0.288482342	0.506	0.411	5.14E-30	2	Ankrd28
Rfx7	2.69E-34	0.307854885	0.473	0.38	5.78E-30	2	Rfx7
Fblim11	5.48E-34	0.304313497	0.38	0.276	1.18E-29	2	Fblim1
Nup93	1.14E-33	0.308598667	0.308	0.211	2.46E-29	2	Nup93
E130308A19Rik	1.59E-33	0.323005225	0.367	0.271	3.42E-29	2	E130308A19Rik
Wdr43	3.78E-33	0.321295761	0.343	0.247	8.13E-29	2	Wdr43
Nop58	5.23E-33	0.304872578	0.329	0.233	1.13E-28	2	Nop58
Cnot6l	5.40E-33	0.30175952	0.415	0.323	1.16E-28	2	Cnot6l
Cdkn1c1	9.24E-33	0.262873992	0.51	0.403	1.99E-28	2	Cdkn1c
Hspa4	1.21E-32	0.290022158	0.459	0.366	2.60E-28	2	Hspa4
Susd12	1.35E-32	0.349357789	0.31	0.215	2.90E-28	2	Susd1
Tomm40	1.92E-32	0.31098583	0.35	0.254	4.14E-28	2	Tomm40
Zcchc141	5.40E-32	0.324482428	0.417	0.324	1.16E-27	2	Zcchc14
Brd8	5.41E-32	0.279517995	0.471	0.382	1.16E-27	2	Brd8
Ezr1	5.81E-32	0.305592936	0.394	0.295	1.25E-27	2	Ezr
Lmnb1	7.76E-32	0.292562462	0.389	0.289	1.67E-27	2	Lmnb1
Tbrg11	1.57E-31	0.319522828	0.328	0.236	3.37E-27	2	Tbrg1
Pkp4	2.86E-31	0.277454101	0.476	0.374	6.15E-27	2	Pkp4
Ythdf3	5.32E-31	0.286968697	0.5	0.42	1.14E-26	2	Ythdf3
Pkp21	7.08E-31	0.273603482	0.416	0.316	1.52E-26	2	Pkp2
Nkain12	1.17E-30	0.318399953	0.307	0.211	2.51E-26	2	Nkain1
Ipo7	1.38E-30	0.294142757	0.328	0.237	2.97E-26	2	Ipo7
Utp20	1.42E-30	0.290410908	0.266	0.177	3.05E-26	2	Utp20
Cmtm8	1.68E-30	0.277500192	0.279	0.184	3.61E-26	2	Cmtm8
Stat31	5.78E-30	0.280551732	0.48	0.392	1.24E-25	2	Stat3
Mms22l	1.33E-29	0.27769866	0.314	0.218	2.86E-25	2	Mms22l
Larp1	1.40E-29	0.251395575	0.514	0.425	3.00E-25	2	Larp1
Phip	2.34E-29	0.25716186	0.506	0.423	5.03E-25	2	Phip
Rbbp8	2.67E-29	0.333653024	0.332	0.245	5.75E-25	2	Rbbp8
Ybx3	4.27E-29	0.297090247	0.286	0.199	9.18E-25	2	Ybx3
Ralgds1	7.60E-29	0.298501098	0.35	0.262	1.63E-24	2	Ralgds
Pnn	7.76E-29	0.295853344	0.384	0.299	1.67E-24	2	Pnn
Pprc1	8.19E-29	0.268794445	0.259	0.173	1.76E-24	2	Pprc1
Ptma	1.08E-28	0.286128337	0.407	0.318	2.33E-24	2	Ptma
Wwp12	1.22E-28	0.269850601	0.486	0.407	2.62E-24	2	Wwp1
Cnbp	2.35E-28	0.287575367	0.293	0.207	5.05E-24	2	Cnbp
Nup160	2.77E-28	0.283433697	0.327	0.238	5.97E-24	2	Nup160
Kmt2a1	5.92E-28	0.255829973	0.609	0.555	1.27E-23	2	Kmt2a
Mpdz1	7.33E-28	0.301608249	0.264	0.181	1.58E-23	2	Mpdz
Ctnnbip11	1.03E-27	0.269440209	0.383	0.288	2.21E-23	2	Ctnnbip1
Igf2bp21	1.29E-27	0.26574344	0.535	0.449	2.79E-23	2	Igf2bp2
Eif2s3x	2.27E-27	0.294401587	0.257	0.175	4.89E-23	2	Eif2s3x
Eef2k1	2.36E-27	0.301008463	0.343	0.255	5.08E-23	2	Eef2k
Ppard1	4.66E-27	0.294361906	0.425	0.338	1.00E-22	2	Ppard
Prep	5.53E-27	0.277619212	0.386	0.299	1.19E-22	2	Prep
Rif1	6.11E-27	0.270677965	0.391	0.304	1.32E-22	2	Rif1
Ptpn111	6.95E-27	0.286118223	0.352	0.27	1.49E-22	2	Ptpn11
Cbx5	8.50E-27	0.267074193	0.396	0.306	1.83E-22	2	Cbx5
Anapc51	9.24E-27	0.267470781	0.377	0.29	1.99E-22	2	Anapc5
Ep400	1.03E-26	0.255628101	0.543	0.482	2.22E-22	2	Ep400
Papd5	2.03E-26	0.28206029	0.405	0.317	4.38E-22	2	Papd5
Rpl41	2.54E-26	0.272509082	0.345	0.259	5.47E-22	2	Rpl41
Fxr1	7.94E-26	0.265876383	0.469	0.394	1.71E-21	2	Fxr1
Serbp1	9.16E-26	0.273100149	0.374	0.289	1.97E-21	2	Serbp1
Dab2ip1	1.56E-25	0.258475739	0.261	0.179	3.37E-21	2	Dab2ip
Gstcd	2.21E-25	0.262395717	0.258	0.178	4.76E-21	2	Gstcd
Hsp90aa1	2.32E-25	0.296935355	0.345	0.264	4.99E-21	2	Hsp90aa1
Zfp5321	3.33E-25	0.288635505	0.446	0.36	7.17E-21	2	Zfp532
Hnrnpk1	4.22E-25	0.253067453	0.467	0.394	9.08E-21	2	Hnrnpk
Crybg3	4.30E-25	0.307542741	0.329	0.249	9.25E-21	2	Crybg3
Zfp5682	4.33E-25	0.279160824	0.435	0.355	9.33E-21	2	Zfp568
Rbm10	8.16E-25	0.295910062	0.305	0.226	1.75E-20	2	Rbm10
Snhg201	1.12E-24	0.287953517	0.326	0.249	2.40E-20	2	Snhg20
Cep192	1.14E-24	0.254412867	0.372	0.289	2.46E-20	2	Cep192
Eef1g	1.44E-24	0.285085026	0.332	0.252	3.10E-20	2	Eef1g
Gga21	1.58E-24	0.2536762	0.386	0.304	3.40E-20	2	Gga2
Naa161	3.59E-24	0.266656743	0.396	0.318	7.71E-20	2	Naa16
Mast2	7.94E-24	0.255320076	0.475	0.402	1.71E-19	2	Mast2
Rell1	1.98E-23	0.272005108	0.35	0.271	4.25E-19	2	Rell1
Egln11	1.40E-22	0.30078531	0.269	0.196	3.01E-18	2	Egln1
2410018L13Rik	1.44E-22	0.267289463	0.406	0.328	3.11E-18	2	2410018L13Rik
Dhx9	1.48E-22	0.254825082	0.397	0.323	3.19E-18	2	Dhx9
Vrk1	1.62E-22	0.265114443	0.28	0.204	3.49E-18	2	Vrk1
Dcakd	1.83E-22	0.283500575	0.304	0.232	3.94E-18	2	Dcakd
Calm2	1.87E-22	0.254240961	0.406	0.33	4.03E-18	2	Calm2
Cbfb	1.23E-21	0.253201518	0.318	0.243	2.66E-17	2	Cbfb
Alkbh1	3.65E-21	0.267317453	0.316	0.244	7.85E-17	2	Alkbh1
Hspa8	5.37E-21	0.25612976	0.289	0.217	1.16E-16	2	Hspa8
Snrnp48	7.34E-21	0.253305506	0.358	0.286	1.58E-16	2	Snrnp48
Bicc1	1.60E-20	0.290579048	0.262	0.19	3.45E-16	2	Bicc1
Ino80	2.81E-20	0.264380519	0.465	0.408	6.04E-16	2	Ino80
Nup205	5.98E-20	0.258426178	0.292	0.225	1.29E-15	2	Nup205
Zdhhc211	1.40E-19	0.264026028	0.331	0.261	3.02E-15	2	Zdhhc21
Tgs1	9.22E-19	0.256745836	0.254	0.191	1.98E-14	2	Tgs1
Zfp948	2.10E-18	0.259352096	0.253	0.188	4.51E-14	2	Zfp948
Rprd1b	3.56E-18	0.254584681	0.321	0.257	7.67E-14	2	Rprd1b
Hif1a	9.05E-18	0.265491228	0.338	0.279	1.95E-13	2	Hif1a
Micall11	1.13E-17	0.260823749	0.29	0.226	2.43E-13	2	Micall1
Ube2q2	1.41E-17	0.251783216	0.38	0.322	3.03E-13	2	Ube2q2
U2af1	3.17E-17	0.255131037	0.29	0.228	6.81E-13	2	U2af1
Prdm10	3.46E-16	0.255037691	0.322	0.262	7.45E-12	2	Prdm10
Meg3	0	2.341927001	0.996	0.571	0	3	Meg3
Ldb2	0	2.310551155	0.918	0.143	0	3	Ldb2
Slit2	0	2.189374901	0.67	0.14	0	3	Slit2
Cyyr1	0	2.056100286	0.714	0.057	0	3	Cyyr1
Itpkb	0	1.977967893	0.765	0.124	0	3	Itpkb
Bmp6	0	1.969051318	0.516	0.049	0	3	Bmp6
Shank3	0	1.900161744	0.687	0.05	0	3	Shank3
Meox2	0	1.85960351	0.567	0.048	0	3	Meox2
Pitpnc1	0	1.855013947	0.815	0.154	0	3	Pitpnc1
Fli1	0	1.85389758	0.817	0.126	0	3	Fli1
Dock4	0	1.829465776	0.852	0.269	0	3	Dock4
Pecam1	0	1.811706999	0.768	0.107	0	3	Pecam1
Galnt18	0	1.794121035	0.794	0.147	0	3	Galnt18
Cd36	0	1.748455932	0.519	0.04	0	3	Cd36
Rasgrp3	0	1.731856178	0.636	0.049	0	3	Rasgrp3
Fgd5	0	1.731282601	0.625	0.04	0	3	Fgd5
Fbxl7	0	1.710635553	0.822	0.223	0	3	Fbxl7
Ptprm1	0	1.686261093	0.994	0.553	0	3	Ptprm
Maml2	0	1.665935956	0.901	0.3	0	3	Maml2
Ablim1	0	1.661419153	0.689	0.166	0	3	Ablim1
Tspan18	0	1.659070103	0.737	0.157	0	3	Tspan18
Rapgef4	0	1.633143996	0.647	0.092	0	3	Rapgef4
Lrmda	0	1.62473425	0.691	0.197	0	3	Lrmda
Tek	0	1.616097739	0.603	0.059	0	3	Tek
Hecw2	0	1.598121957	0.597	0.076	0	3	Hecw2
Ptprb	0	1.572010226	0.581	0.061	0	3	Ptprb
Zeb1	0	1.566311744	0.837	0.282	0	3	Zeb1
Zfp366	0	1.565645737	0.487	0.023	0	3	Zfp366
Adgrl4	0	1.560142708	0.502	0.037	0	3	Adgrl4
Airn	0	1.554126233	0.995	0.684	0	3	Airn
Emcn	0	1.553431166	0.521	0.041	0	3	Emcn
Piezo22	0	1.541737903	0.794	0.248	0	3	Piezo2
Mirg	0	1.540216504	0.647	0.136	0	3	Mirg
Nrp1	0	1.512996986	0.676	0.128	0	3	Nrp1
Dlk1	0	1.496899225	0.602	0.106	0	3	Dlk1
Stab2	0	1.49661372	0.442	0.057	0	3	Stab2
Nfib	0	1.48803414	0.824	0.255	0	3	Nfib
Adam23	0	1.479315419	0.432	0.058	0	3	Adam23
Slc1a2	0	1.473565174	0.41	0.016	0	3	Slc1a2
Rtl1	0	1.45169421	0.431	0.031	0	3	Rtl1
Rnf144a	0	1.45074935	0.522	0.065	0	3	Rnf144a
Mcc	0	1.437107369	0.752	0.257	0	3	Mcc
Hdac7	0	1.404746679	0.519	0.057	0	3	Hdac7
Limch1	0	1.402473275	0.475	0.084	0	3	Limch1
Pcbp3	0	1.397402889	0.542	0.112	0	3	Pcbp3
Tmtc2	0	1.372828831	0.522	0.133	0	3	Tmtc2
Plcb1	0	1.359667856	0.467	0.109	0	3	Plcb1
Enpp2	0	1.357570096	0.38	0.034	0	3	Enpp2
Hmcn1	0	1.348077936	0.445	0.064	0	3	Hmcn1
Rapgef5	0	1.346443532	0.646	0.19	0	3	Rapgef5
Magel2	0	1.34135949	0.422	0.045	0	3	Magel2
Mest	0	1.332254387	0.555	0.117	0	3	Mest
Eng	0	1.33149471	0.478	0.054	0	3	Eng
Ppp1r16b	0	1.318000272	0.423	0.034	0	3	Ppp1r16b
Thsd1	0	1.316787945	0.441	0.042	0	3	Thsd1
Pced1b1	0	1.305263165	0.604	0.194	0	3	Pced1b
Csgalnact1	0	1.29249825	0.677	0.201	0	3	Csgalnact1
Zfp521	0	1.280781963	0.475	0.075	0	3	Zfp521
Phactr2	0	1.277021044	0.771	0.349	0	3	Phactr2
Ttc28	0	1.270330775	0.727	0.268	0	3	Ttc28
Flrt2	0	1.264056629	0.406	0.069	0	3	Flrt2
Zbtb46	0	1.250901341	0.466	0.089	0	3	Zbtb46
Arap3	0	1.250073917	0.478	0.069	0	3	Arap3
Adam12	0	1.241643175	0.605	0.179	0	3	Adam12
Pcdh17	0	1.225205964	0.31	0.028	0	3	Pcdh17
Ldlrad4	0	1.220422786	0.483	0.106	0	3	Ldlrad4
Dgkh	0	1.21025101	0.609	0.199	0	3	Dgkh
Heg1	0	1.199340974	0.605	0.223	0	3	Heg1
Erg	0	1.188065096	0.371	0.023	0	3	Erg
Elmo11	0	1.186394885	0.928	0.533	0	3	Elmo1
Edil3	0	1.182983441	0.293	0.037	0	3	Edil3
Foxp1	0	1.17876649	0.702	0.304	0	3	Foxp1
Igfbp71	0	1.1744782	0.576	0.185	0	3	Igfbp7
Lama4	0	1.173771582	0.482	0.123	0	3	Lama4
Zfp608	0	1.170579388	0.575	0.168	0	3	Zfp608
Agmo	0	1.167675875	0.315	0.028	0	3	Agmo
Calcrl	0	1.167431947	0.448	0.084	0	3	Calcrl
Chrdl1	0	1.16378692	0.283	0.023	0	3	Chrdl1
Exoc3l2	0	1.159937548	0.345	0.021	0	3	Exoc3l2
Prickle1	0	1.153269916	0.826	0.393	0	3	Prickle1
Bach2	0	1.148787622	0.657	0.234	0	3	Bach2
Dach1	0	1.147203143	0.295	0.041	0	3	Dach1
A230057D06Rik	0	1.143273611	0.324	0.043	0	3	A230057D06Rik
Nedd9	0	1.141321785	0.527	0.123	0	3	Nedd9
Pcdh19	0	1.139525598	0.303	0.03	0	3	Pcdh19
St6galnac3	0	1.136424664	0.913	0.358	0	3	St6galnac3
Tshz2	0	1.136083848	0.673	0.215	0	3	Tshz2
Mef2c	0	1.126134257	0.447	0.086	0	3	Mef2c
Elk31	0	1.108938373	0.559	0.194	0	3	Elk3
Hip1	0	1.105684265	0.619	0.228	0	3	Hip1
Nova2	0	1.102080465	0.322	0.016	0	3	Nova2
Sptbn1	0	1.087260521	0.872	0.57	0	3	Sptbn1
Plxna4	0	1.086198382	0.461	0.12	0	3	Plxna4
Kdr	0	1.062023787	0.359	0.045	0	3	Kdr
Nbea	0	1.059148456	0.483	0.139	0	3	Nbea
AC138306.1	0	1.056366064	0.289	0.021	0	3	AC138306.1
Rspo3	0	1.048714541	0.302	0.032	0	3	Rspo3
Tie1	0	1.047456702	0.34	0.025	0	3	Tie1
Ptprg	0	1.039104347	0.797	0.413	0	3	Ptprg
Sik31	0	1.026938528	0.897	0.559	0	3	Sik3
Arhgef15	0	1.024628367	0.313	0.02	0	3	Arhgef15
Ddah1	0	1.016122493	0.389	0.097	0	3	Ddah1
Acvrl1	0	1.01382	0.339	0.051	0	3	Acvrl1
Magi1	0	1.011784598	0.945	0.739	0	3	Magi1
Fmnl21	0	1.003765778	0.79	0.329	0	3	Fmnl2
Inpp5a	0	1.002453788	0.478	0.168	0	3	Inpp5a
Zbtb20	0	0.995214812	0.794	0.463	0	3	Zbtb20
Ushbp1	0	0.988082055	0.285	0.016	0	3	Ushbp1
Rin3	0	0.983866688	0.429	0.132	0	3	Rin3
Ets1	0	0.982385533	0.437	0.109	0	3	Ets1
Itga6	0	0.980932786	0.52	0.166	0	3	Itga6
Ncald	0	0.959848605	0.309	0.07	0	3	Ncald
Pdgfb1	0	0.957488092	0.32	0.067	0	3	Pdgfb
Zfp423	0	0.954598603	0.545	0.187	0	3	Zfp423
Dgkz	0	0.949775637	0.439	0.139	0	3	Dgkz
Igf2r	0	0.949128364	0.546	0.237	0	3	Igf2r
Zdhhc15	0	0.940873071	0.296	0.04	0	3	Zdhhc15
Acer2	0	0.936292452	0.284	0.056	0	3	Acer2
Adamts9	0	0.933659453	0.538	0.17	0	3	Adamts9
Psd3	0	0.928006976	0.688	0.357	0	3	Psd3
Inpp5d	0	0.919087019	0.34	0.043	0	3	Inpp5d
Fhl1	0	0.915009977	0.287	0.042	0	3	Fhl1
Rhoj	0	0.905578453	0.472	0.155	0	3	Rhoj
Dcbld1	0	0.904236509	0.274	0.046	0	3	Dcbld1
Sh3bp5	0	0.898655957	0.327	0.07	0	3	Sh3bp5
Coro2b	0	0.887454903	0.307	0.055	0	3	Coro2b
Fndc3c1	0	0.882346816	0.252	0.038	0	3	Fndc3c1
B830012L14Rik	0	0.878667139	0.297	0.054	0	3	B830012L14Rik
Rai141	0	0.875950274	0.782	0.481	0	3	Rai14
Plcl1	0	0.872541868	0.552	0.192	0	3	Plcl1
Srgap1	0	0.871581556	0.815	0.449	0	3	Srgap1
Col18a1	0	0.870433137	0.285	0.051	0	3	Col18a1
Prkch	0	0.865909223	0.844	0.456	0	3	Prkch
Col4a11	0	0.862225202	0.92	0.478	0	3	Col4a1
Pde4d	0	0.849450979	0.9	0.674	0	3	Pde4d
Rbpms	0	0.838150337	0.887	0.635	0	3	Rbpms
Plagl11	0	0.829458379	0.664	0.307	0	3	Plagl1
Ece1	0	0.818145701	0.282	0.052	0	3	Ece1
Rgs3	0	0.811698107	0.323	0.079	0	3	Rgs3
Maged2	0	0.808072358	0.252	0.041	0	3	Maged2
Pald1	0	0.764509667	0.263	0.051	0	3	Pald1
Col4a21	0	0.751498036	0.798	0.405	0	3	Col4a2
Plekhg11	0	0.739610116	0.805	0.468	0	3	Plekhg1
Tcf41	0	0.518014245	0.941	0.735	0	3	Tcf4
Gm14005	6.49E-307	0.782785435	0.448	0.145	1.40E-302	3	Gm14005
Stard9	7.24E-305	0.912860812	0.368	0.11	1.56E-300	3	Stard9
Stim2	7.34E-299	0.888174949	0.412	0.138	1.58E-294	3	Stim2
Foxn31	4.85E-293	0.753314046	0.825	0.565	1.04E-288	3	Foxn3
Pdzd2	5.01E-290	0.784985253	0.46	0.167	1.08E-285	3	Pdzd2
Fyn	3.48E-283	0.886421923	0.585	0.288	7.49E-279	3	Fyn
Chn2	5.21E-283	0.874187412	0.384	0.12	1.12E-278	3	Chn2
Foxo1	4.02E-279	0.935633923	0.492	0.208	8.64E-275	3	Foxo1
Prkce1	1.29E-276	0.571592992	0.866	0.573	2.77E-272	3	Prkce
Ica1	6.95E-274	0.900165063	0.359	0.114	1.49E-269	3	Ica1
Arhgap29	8.34E-273	0.88372724	0.517	0.235	1.80E-268	3	Arhgap29
Apbb2	2.09E-272	0.590981471	0.942	0.824	4.49E-268	3	Apbb2
Arl151	1.01E-269	0.519732185	0.916	0.766	2.18E-265	3	Arl15
Nf1	3.46E-263	0.840218318	0.558	0.272	7.44E-259	3	Nf1
Adcy9	1.90E-262	1.041018694	0.515	0.244	4.09E-258	3	Adcy9
Adgrf5	1.29E-259	0.834894251	0.577	0.29	2.77E-255	3	Adgrf5
Plac11	1.76E-258	1.024513647	0.698	0.476	3.79E-254	3	Plac1
Lrrc8c2	5.12E-253	0.801378891	0.612	0.319	1.10E-248	3	Lrrc8c
Snrk	4.35E-252	0.84314038	0.347	0.113	9.35E-248	3	Snrk
Rapgef3	5.74E-252	0.807783776	0.324	0.099	1.24E-247	3	Rapgef3
Prex22	2.25E-250	0.791413493	0.651	0.36	4.84E-246	3	Prex2
Fmnl3	5.29E-245	0.806752593	0.347	0.114	1.14E-240	3	Fmnl3
Klf7	6.34E-242	0.799108668	0.606	0.334	1.36E-237	3	Klf7
Atxn1	8.12E-241	0.699816505	0.663	0.366	1.75E-236	3	Atxn1
Lyn	3.59E-239	0.742196612	0.626	0.358	7.71E-235	3	Lyn
Epas1	5.84E-239	0.677048295	0.811	0.575	1.26E-234	3	Epas1
Tspan9	1.04E-235	0.642783321	0.823	0.582	2.24E-231	3	Tspan9
Ubash3b	1.79E-233	0.586760389	0.419	0.161	3.85E-229	3	Ubash3b
Rbms1	9.86E-233	0.480013012	0.964	0.889	2.12E-228	3	Rbms1
Tgfbr2	2.88E-229	0.809555437	0.462	0.202	6.20E-225	3	Tgfbr2
Pitpnm2	1.08E-223	0.730199931	0.443	0.18	2.32E-219	3	Pitpnm2
Grk5	5.11E-220	0.822453004	0.433	0.181	1.10E-215	3	Grk5
Gm383992	6.66E-220	0.769298786	0.597	0.326	1.43E-215	3	Gm38399
Cmtm81	1.59E-216	0.81834969	0.416	0.172	3.43E-212	3	Cmtm8
Afap1l12	1.34E-215	0.759554031	0.362	0.132	2.88E-211	3	Afap1l1
Tcf7l1	7.61E-210	0.591407416	0.68	0.375	1.64E-205	3	Tcf7l1
Plcl2	5.28E-205	0.754533658	0.514	0.261	1.14E-200	3	Plcl2
Bcl2	1.87E-204	0.760790057	0.306	0.1	4.03E-200	3	Bcl2
Klf3	2.93E-204	0.769533704	0.349	0.13	6.31E-200	3	Klf3
Hivep2	4.23E-204	0.717356331	0.63	0.374	9.10E-200	3	Hivep2
Cdyl21	1.77E-200	0.817884213	0.482	0.235	3.80E-196	3	Cdyl2
Efr3b	3.42E-198	0.943817848	0.332	0.124	7.37E-194	3	Efr3b
Tjp1	8.05E-195	0.693334224	0.684	0.489	1.73E-190	3	Tjp1
Sntb11	9.21E-190	0.740875811	0.289	0.095	1.98E-185	3	Sntb1
Nrp2	1.95E-188	0.597088842	0.257	0.074	4.19E-184	3	Nrp2
Nfia	8.93E-188	0.579102183	0.522	0.259	1.92E-183	3	Nfia
Ccnjl	8.84E-184	0.709755739	0.331	0.123	1.90E-179	3	Ccnjl
Efnb21	5.03E-182	0.843858893	0.39	0.172	1.08E-177	3	Efnb2
4931406P16Rik	7.81E-182	0.794068682	0.533	0.316	1.68E-177	3	4931406P16Rik
Scarb1	5.63E-179	0.742277193	0.365	0.151	1.21E-174	3	Scarb1
Dysf1	8.64E-178	0.5238886	0.689	0.411	1.86E-173	3	Dysf
Klf12	1.82E-177	0.648893955	0.319	0.112	3.91E-173	3	Klf12
Nxn	7.11E-176	0.750217774	0.408	0.181	1.53E-171	3	Nxn
Gulp1	1.17E-174	0.683486456	0.38	0.159	2.51E-170	3	Gulp1
Gtf2i	2.28E-174	0.66368337	0.348	0.137	4.90E-170	3	Gtf2i
Mast42	1.24E-171	0.647677036	0.769	0.588	2.68E-167	3	Mast4
Sorbs1	1.04E-168	0.46349499	0.838	0.626	2.25E-164	3	Sorbs1
Atp7a	1.49E-167	0.757112826	0.441	0.224	3.20E-163	3	Atp7a
Mb21d2	1.39E-165	0.802780419	0.377	0.171	2.99E-161	3	Mb21d2
Msrb31	2.66E-164	0.667274158	0.448	0.217	5.72E-160	3	Msrb3
App	4.27E-164	0.511207396	0.786	0.621	9.19E-160	3	App
Plpp1	9.85E-163	0.664682567	0.584	0.361	2.12E-158	3	Plpp1
Vav31	3.03E-162	0.609328147	0.55	0.311	6.51E-158	3	Vav3
Ppp1r13b	4.88E-162	0.699246039	0.52	0.303	1.05E-157	3	Ppp1r13b
Arhgef31	1.29E-159	0.677366072	0.647	0.442	2.77E-155	3	Arhgef3
Rasal2	7.64E-159	0.762772717	0.502	0.301	1.64E-154	3	Rasal2
Dpysl31	1.42E-153	0.679779463	0.284	0.105	3.06E-149	3	Dpysl3
Pde9a	7.59E-153	0.661073392	0.26	0.091	1.63E-148	3	Pde9a
Baz2b	6.43E-152	0.646276625	0.594	0.4	1.38E-147	3	Baz2b
Lrrfip11	4.63E-148	0.684266624	0.534	0.324	9.96E-144	3	Lrrfip1
Klhdc10	4.20E-146	0.627389109	0.534	0.329	9.05E-142	3	Klhdc10
Agap1	4.62E-146	0.505240883	0.737	0.555	9.93E-142	3	Agap1
Zdbf21	8.59E-146	0.806505528	0.327	0.143	1.85E-141	3	Zdbf2
Adgrl2	2.58E-145	0.622368444	0.6	0.386	5.56E-141	3	Adgrl2
Kcnq1	2.99E-139	0.747301056	0.345	0.162	6.44E-135	3	Kcnq1
Dennd5b	1.41E-138	0.65794997	0.332	0.149	3.04E-134	3	Dennd5b
Rassf31	2.20E-138	0.595985872	0.678	0.507	4.72E-134	3	Rassf3
Irf21	5.98E-137	0.642604557	0.571	0.39	1.29E-132	3	Irf2
Ghr	3.23E-136	0.48445388	0.659	0.449	6.95E-132	3	Ghr
Arhgap261	6.42E-136	0.541350986	0.542	0.315	1.38E-131	3	Arhgap26
Mgll	4.16E-132	0.819443319	0.37	0.184	8.95E-128	3	Mgll
Arhgef7	3.00E-131	0.668847159	0.333	0.156	6.45E-127	3	Arhgef7
Tanc1	9.15E-131	0.514418445	0.631	0.431	1.97E-126	3	Tanc1
Asap21	1.25E-128	0.612685847	0.391	0.198	2.69E-124	3	Asap2
Shroom2	2.31E-127	0.655507142	0.425	0.238	4.98E-123	3	Shroom2
Pard3b	3.09E-127	0.450077899	0.542	0.339	6.65E-123	3	Pard3b
Nfkb1	3.93E-126	0.637855516	0.363	0.179	8.45E-122	3	Nfkb1
Dock91	5.33E-122	0.47679586	0.714	0.544	1.15E-117	3	Dock9
Slco3a12	1.49E-120	0.58692593	0.472	0.266	3.20E-116	3	Slco3a1
Tmem164	3.96E-120	0.593076742	0.663	0.534	8.53E-116	3	Tmem164
Sema6a1	6.18E-119	0.383404472	0.625	0.4	1.33E-114	3	Sema6a
Lama1	4.19E-118	0.327690225	0.338	0.157	9.01E-114	3	Lama1
Add3	5.23E-116	0.576775498	0.354	0.176	1.13E-111	3	Add3
Arhgap18	1.79E-115	0.673336535	0.499	0.321	3.85E-111	3	Arhgap18
Parvb1	3.69E-113	0.597359654	0.329	0.16	7.94E-109	3	Parvb
Podxl	5.73E-110	0.585690249	0.286	0.126	1.23E-105	3	Podxl
Fry1	1.06E-109	0.639241684	0.366	0.191	2.28E-105	3	Fry
Itga11	1.41E-109	0.604694644	0.353	0.181	3.04E-105	3	Itga1
St3gal4	1.18E-108	0.528364966	0.562	0.37	2.54E-104	3	St3gal4
Zfp7101	5.16E-108	0.629697139	0.383	0.211	1.11E-103	3	Zfp710
Jmjd1c	9.73E-108	0.450987808	0.732	0.629	2.09E-103	3	Jmjd1c
Tcte2	2.51E-107	0.694606509	0.26	0.115	5.41E-103	3	Tcte2
Ksr1	7.37E-106	0.540267425	0.442	0.258	1.59E-101	3	Ksr1
Wipf12	3.08E-105	0.433111779	0.629	0.431	6.63E-101	3	Wipf1
Raph1	2.09E-103	0.578347262	0.556	0.415	4.51E-99	3	Raph1
Myo6	1.36E-102	0.631170937	0.349	0.186	2.93E-98	3	Myo6
Arhgap311	1.43E-101	0.382344641	0.82	0.696	3.08E-97	3	Arhgap31
Gng2	7.48E-101	0.587561796	0.279	0.127	1.61E-96	3	Gng2
Sgms1	4.74E-100	0.59284559	0.61	0.469	1.02E-95	3	Sgms1
Pde10a	3.11E-98	0.417912761	0.507	0.318	6.69E-94	3	Pde10a
Acap2	1.67E-96	0.604404661	0.452	0.301	3.59E-92	3	Acap2
Farp1	6.66E-96	0.351031109	0.625	0.422	1.43E-91	3	Farp1
Plxna21	3.14E-93	0.5648244	0.324	0.167	6.75E-89	3	Plxna2
Ppp3ca	3.77E-92	0.457335335	0.707	0.601	8.11E-88	3	Ppp3ca
Piezo1	1.31E-90	0.576734183	0.433	0.278	2.82E-86	3	Piezo1
Kitl1	3.82E-90	0.526592302	0.52	0.358	8.22E-86	3	Kitl
Sash1	1.95E-89	0.490834994	0.599	0.469	4.20E-85	3	Sash1
Hipk2	7.26E-89	0.382928117	0.429	0.256	1.56E-84	3	Hipk2
Arhgap28	1.57E-88	0.45615179	0.639	0.5	3.38E-84	3	Arhgap28
Lcp11	3.44E-86	0.528936917	0.31	0.161	7.39E-82	3	Lcp1
Ppp1r9a1	5.33E-86	0.45949916	0.641	0.493	1.15E-81	3	Ppp1r9a
Rasa31	4.11E-85	0.476941375	0.364	0.206	8.83E-81	3	Rasa3
Rin2	2.12E-84	0.612989548	0.301	0.157	4.56E-80	3	Rin2
Nhsl2	2.33E-84	0.373295987	0.256	0.114	5.01E-80	3	Nhsl2
Kcnk5	3.19E-84	0.715239356	0.294	0.156	6.86E-80	3	Kcnk5
Phlpp11	1.09E-83	0.537225712	0.557	0.428	2.34E-79	3	Phlpp1
Dock61	8.82E-82	0.535195132	0.468	0.322	1.90E-77	3	Dock6
Sema6d1	9.54E-80	0.55885093	0.363	0.214	2.05E-75	3	Sema6d
St3gal1	2.13E-79	0.546958102	0.324	0.182	4.58E-75	3	St3gal1
Lamb11	4.20E-78	0.450953363	0.391	0.235	9.04E-74	3	Lamb1
Rbfox2	4.35E-78	0.390161529	0.716	0.655	9.36E-74	3	Rbfox2
Pam	2.63E-77	0.538165343	0.432	0.289	5.66E-73	3	Pam
Lrrc8b	5.65E-77	0.518145456	0.319	0.18	1.22E-72	3	Lrrc8b
Znrf11	1.34E-76	0.510342892	0.533	0.407	2.88E-72	3	Znrf1
Ssh2	1.63E-76	0.524508262	0.526	0.411	3.51E-72	3	Ssh2
St51	1.08E-73	0.44410078	0.55	0.411	2.33E-69	3	St5
Fam107b1	2.13E-72	0.521111885	0.364	0.224	4.58E-68	3	Fam107b
Smad1	2.24E-72	0.566225357	0.288	0.159	4.81E-68	3	Smad1
Ergic1	8.60E-72	0.551949233	0.334	0.202	1.85E-67	3	Ergic1
Plcg1	1.28E-71	0.529692956	0.333	0.202	2.75E-67	3	Plcg1
Meis1	1.28E-71	0.407427394	0.405	0.257	2.75E-67	3	Meis1
Wasf2	8.66E-71	0.466376227	0.59	0.505	1.86E-66	3	Wasf2
Abcg2	1.27E-70	0.4670779	0.269	0.141	2.74E-66	3	Abcg2
Ptk21	1.28E-70	0.324567237	0.784	0.743	2.74E-66	3	Ptk2
Plcb4	1.45E-69	0.394820593	0.494	0.337	3.13E-65	3	Plcb4
Smad3	2.65E-69	0.392802705	0.351	0.199	5.71E-65	3	Smad3
Smad6	1.33E-68	0.66475101	0.29	0.163	2.87E-64	3	Smad6
Ccbe1	1.45E-68	0.49817666	0.317	0.178	3.13E-64	3	Ccbe1
[truncated: 10,849 more rows]
