# Supplementary material for: Single nuclei RNA-seq of mouse placental labyrinth development
Source: eLife. 2020 Nov 3;9:e60266. doi: 10.7554/eLife.60266 (PMC7669270; doi:10.7554/eLife.60266)
Supplement: Figure 2—source data 1. [file elife-60266-fig2-data1.csv]

	X	p_val	avg_logFC	pct.1	pct.2	p_val_adj	cluster	gene
1	Glis1	0	2.77974944734899	0.993	0.225	0	SynTI	Glis1
2	Dab1	0	2.19891057545347	0.919	0.127	0	SynTI	Dab1
3	Snap91	0	2.12551669407488	0.96	0.229	0	SynTI	Snap91
4	Iqgap2	0	2.06323425026619	0.937	0.261	0	SynTI	Iqgap2
5	Arl15	0	2.00668701721806	0.973	0.722	0	SynTI	Arl15
6	Caskin1	0	1.99067863186716	0.972	0.377	0	SynTI	Caskin1
7	Ralgps1	0	1.9434268357442	0.893	0.171	0	SynTI	Ralgps1
8	Fmnl2	0	1.84249562483014	0.717	0.182	0	SynTI	Fmnl2
9	Stra6	0	1.83082652302843	0.936	0.19	0	SynTI	Stra6
10	Rbm20	0	1.79297267295617	0.781	0.154	0	SynTI	Rbm20
11	Mpp7	0	1.73776866174604	0.954	0.421	0	SynTI	Mpp7
12	Tacc2	0	1.70070044609889	0.989	0.485	0	SynTI	Tacc2
13	Plekha6	0	1.68710999211411	0.96	0.308	0	SynTI	Plekha6
14	Mapre2	0	1.65192416260536	0.863	0.214	0	SynTI	Mapre2
15	Samd4	0	1.62908241552993	0.74	0.141	0	SynTI	Samd4
16	Tbc1d4	0	1.5909783718165	0.672	0.109	0	SynTI	Tbc1d4
17	Mylk	0	1.5889319212475	0.727	0.094	0	SynTI	Mylk
18	Slc22a23	0	1.58626735601725	0.882	0.189	0	SynTI	Slc22a23
19	Psmd9	0	1.58529752069416	0.78	0.17	0	SynTI	Psmd9
20	Lims2	0	1.57657984424794	0.772	0.076	0	SynTI	Lims2
21	Iqsec1	0	1.5762494889698	0.968	0.527	0	SynTI	Iqsec1
22	Akap13	0	1.55376072267336	0.979	0.545	0	SynTI	Akap13
23	Kank1	0	1.54773037437804	0.976	0.439	0	SynTI	Kank1
24	Sik3	0	1.5398617280946	0.945	0.425	0	SynTI	Sik3
25	Epb41l4a	0	1.53777409265313	0.68	0.084	0	SynTI	Epb41l4a
26	Car4	0	1.53266910969521	0.851	0.157	0	SynTI	Car4
27	Kirrel3	0	1.5273529708864	0.611	0.062	0	SynTI	Kirrel3
28	Echdc2	0	1.48998698364855	0.744	0.124	0	SynTI	Echdc2
29	Pex5l	0	1.46283374140908	0.723	0.095	0	SynTI	Pex5l
30	Zbtb7c	0	1.45917055444329	0.928	0.378	0	SynTI	Zbtb7c
31	Med12l	0	1.45895105708702	0.854	0.319	0	SynTI	Med12l
32	Thrb	0	1.45498106358177	0.664	0.09	0	SynTI	Thrb
33	Osbp2	0	1.43797416995139	0.629	0.053	0	SynTI	Osbp2
34	B230312C02Rik	0	1.43754804879967	0.645	0.05	0	SynTI	B230312C02Rik
35	Hlcs	0	1.43549010737595	0.802	0.221	0	SynTI	Hlcs
36	Arhgap26	0	1.43025218761068	0.677	0.227	0	SynTI	Arhgap26
37	Ptpn13	0	1.42001547841244	0.817	0.184	0	SynTI	Ptpn13
38	Atrnl1	0	1.39963825918855	0.953	0.551	0	SynTI	Atrnl1
39	Slco4a1	0	1.39725266789193	0.737	0.111	0	SynTI	Slco4a1
40	Kifc3	0	1.39541364630844	0.59	0.07	0	SynTI	Kifc3
41	Sgms2	0	1.38760584596199	0.654	0.076	0	SynTI	Sgms2
42	Cds1	0	1.37800904983007	0.769	0.136	0	SynTI	Cds1
43	Cmtm4	0	1.36721795327607	0.916	0.309	0	SynTI	Cmtm4
44	Tgfa	0	1.35450209042396	0.725	0.085	0	SynTI	Tgfa
45	Amot	0	1.34467129664921	0.758	0.181	0	SynTI	Amot
46	Shb	0	1.33255393806459	0.849	0.221	0	SynTI	Shb
47	Tfrc	0	1.32949459969966	0.879	0.291	0	SynTI	Tfrc
48	Prkcz	0	1.32533916123435	0.874	0.227	0	SynTI	Prkcz
49	Ahcyl2	0	1.31842858139266	0.959	0.574	0	SynTI	Ahcyl2
50	Stard8	0	1.31565519832486	0.611	0.058	0	SynTI	Stard8
51	Bmper	0	1.30637296553509	0.502	0.06	0	SynTI	Bmper
52	Lrp8	0	1.30370207274843	0.726	0.142	0	SynTI	Lrp8
53	Arid1b	0	1.30020807359207	0.989	0.724	0	SynTI	Arid1b
54	Gm28375	0	1.29358862343867	0.511	0.053	0	SynTI	Gm28375
55	Msrb3	0	1.28887361093439	0.624	0.122	0	SynTI	Msrb3
56	Dysf	0	1.2866794493593	0.947	0.411	0	SynTI	Dysf
57	C2cd2	0	1.28655177627976	0.786	0.201	0	SynTI	C2cd2
58	Mtus1	0	1.28353895184082	0.877	0.274	0	SynTI	Mtus1
59	Mycbp2	0	1.27621373356682	0.98	0.731	0	SynTI	Mycbp2
60	Plcg2	0	1.27453483345741	0.627	0.091	0	SynTI	Plcg2
61	Agrn	0	1.27379736010084	0.557	0.082	0	SynTI	Agrn
62	Sept4	0	1.27299593937802	0.669	0.092	0	SynTI	Sept4
63	Tec	0	1.26127884743277	0.749	0.163	0	SynTI	Tec
64	Plagl1	0	1.25356335017878	0.71	0.169	0	SynTI	Plagl1
65	Itpk1	0	1.24662869319456	0.849	0.303	0	SynTI	Itpk1
66	Tpcn1	0	1.24072243575046	0.719	0.143	0	SynTI	Tpcn1
67	Prr5l	0	1.24062839243985	0.626	0.062	0	SynTI	Prr5l
68	Dlg5	0	1.23150066431923	0.878	0.353	0	SynTI	Dlg5
69	Clip1	0	1.22482804730844	0.742	0.179	0	SynTI	Clip1
70	Slc41a2	0	1.20503041314832	0.638	0.106	0	SynTI	Slc41a2
71	Foxn3	0	1.2033100979247	0.934	0.478	0	SynTI	Foxn3
72	Ankrd44	0	1.19597059171818	0.673	0.157	0	SynTI	Ankrd44
73	Ehbp1	0	1.19464559874309	0.964	0.646	0	SynTI	Ehbp1
74	Ap2a2	0	1.193054421409	0.896	0.362	0	SynTI	Ap2a2
75	Chd3	0	1.18204916217254	0.664	0.148	0	SynTI	Chd3
76	Rb1	0	1.17749854471703	0.751	0.201	0	SynTI	Rb1
77	Batf3	0	1.17417354235818	0.61	0.085	0	SynTI	Batf3
78	Uaca	0	1.17349670203293	0.9	0.352	0	SynTI	Uaca
79	Lonrf3	0	1.17334202289857	0.639	0.095	0	SynTI	Lonrf3
80	Rassf5	0	1.16605474112079	0.506	0.025	0	SynTI	Rassf5
81	C2cd5	0	1.16384353818892	0.765	0.226	0	SynTI	C2cd5
82	Baiap2l1	0	1.1593332294659	0.682	0.179	0	SynTI	Baiap2l1
83	Wnk3	0	1.15803003590988	0.659	0.146	0	SynTI	Wnk3
84	Rufy3	0	1.13537886618103	0.646	0.157	0	SynTI	Rufy3
85	Ahnak	0	1.12844925716729	0.95	0.532	0	SynTI	Ahnak
86	Sdk1	0	1.11295902628975	0.888	0.498	0	SynTI	Sdk1
87	Plekha7	0	1.09030869683116	0.947	0.554	0	SynTI	Plekha7
88	Tulp1	0	1.08887676157514	0.556	0.071	0	SynTI	Tulp1
89	Sgk3	0	1.08347837816256	0.651	0.164	0	SynTI	Sgk3
90	Ppip5k1	0	1.0795711880223	0.503	0.066	0	SynTI	Ppip5k1
91	Vgll4	0	1.07903962782838	0.898	0.413	0	SynTI	Vgll4
92	Jag2	0	1.07329936478879	0.499	0.046	0	SynTI	Jag2
93	Plekhd1	0	1.07240263699184	0.478	0.022	0	SynTI	Plekhd1
94	Sesn1	0	1.06874538400964	0.912	0.507	0	SynTI	Sesn1
95	Stxbp6	0	1.06774172237252	0.435	0.044	0	SynTI	Stxbp6
96	Sgk2	0	1.06671044069389	0.512	0.048	0	SynTI	Sgk2
97	Dennd2a	0	1.05977101908167	0.918	0.505	0	SynTI	Dennd2a
98	Ppfia1	0	1.04771432138713	0.836	0.36	0	SynTI	Ppfia1
99	Pid1	0	1.04685593778537	0.419	0.044	0	SynTI	Pid1
100	Ppfibp2	0	1.04408901950963	0.827	0.331	0	SynTI	Ppfibp2
101	Ap1s3	0	1.04208913375487	0.673	0.204	0	SynTI	Ap1s3
102	Hipk2	0	1.03072987577796	0.516	0.101	0	SynTI	Hipk2
103	Trpm6	0	1.03033880216291	0.619	0.125	0	SynTI	Trpm6
104	Ank	0	1.02915547384395	0.816	0.297	0	SynTI	Ank
105	Foxo3	0	1.02401896523371	0.665	0.213	0	SynTI	Foxo3
106	Bicdl1	0	1.0162886968204	0.781	0.284	0	SynTI	Bicdl1
107	AC133498.1	0	1.0154559655964	0.423	0.049	0	SynTI	AC133498.1
108	Kitl	0	1.01483255830853	0.816	0.351	0	SynTI	Kitl
109	Gm13269	0	1.01370435467608	0.344	0.039	0	SynTI	Gm13269
110	4932438A13Rik	0	1.01147720442247	0.872	0.454	0	SynTI	4932438A13Rik
111	Gpr137b	0	1.00164497155128	0.564	0.105	0	SynTI	Gpr137b
112	Lnx2	0	1.00035528435238	0.834	0.36	0	SynTI	Lnx2
113	Dmxl2	0	0.998116092744497	0.736	0.259	0	SynTI	Dmxl2
114	Rhpn2	0	0.997411774964821	0.478	0.046	0	SynTI	Rhpn2
115	Atp11a	0	0.99617787137015	0.948	0.574	0	SynTI	Atp11a
116	Slc1a1	0	0.991748173875381	0.399	0.024	0	SynTI	Slc1a1
117	Stx6	0	0.991223135396345	0.619	0.158	0	SynTI	Stx6
118	Plxna2	0	0.988255524413112	0.575	0.12	0	SynTI	Plxna2
119	Abcd4	0	0.973985348126763	0.63	0.183	0	SynTI	Abcd4
120	Fam129b	0	0.970652756915148	0.777	0.203	0	SynTI	Fam129b
121	Folr1	0	0.97008831861317	0.465	0.044	0	SynTI	Folr1
122	Etnk1	0	0.96913042070207	0.61	0.173	0	SynTI	Etnk1
123	Rbms2	0	0.967887762096673	0.857	0.474	0	SynTI	Rbms2
124	Exoc3l4	0	0.9673965767929	0.649	0.157	0	SynTI	Exoc3l4
125	Stk40	0	0.965846690961617	0.543	0.109	0	SynTI	Stk40
126	Tsga10	0	0.96503464731181	0.504	0.087	0	SynTI	Tsga10
127	Lyst	0	0.960601824921705	0.611	0.169	0	SynTI	Lyst
128	Anxa3	0	0.955885723441353	0.624	0.164	0	SynTI	Anxa3
129	Slc12a7	0	0.947628749564989	0.715	0.246	0	SynTI	Slc12a7
130	Plekha1	0	0.9450770199533	0.578	0.144	0	SynTI	Plekha1
131	Eps8	0	0.942874737558354	0.842	0.41	0	SynTI	Eps8
132	Ndrg1	0	0.939496238931777	0.674	0.192	0	SynTI	Ndrg1
133	Kif16b	0	0.938614751899927	0.681	0.243	0	SynTI	Kif16b
134	Clybl	0	0.936383473808418	0.783	0.413	0	SynTI	Clybl
135	Tead1	0	0.93484531311284	0.937	0.498	0	SynTI	Tead1
136	Rassf6	0	0.934374669423843	0.535	0.092	0	SynTI	Rassf6
137	Cd9	0	0.934294592648221	0.801	0.354	0	SynTI	Cd9
138	Sh3tc2	0	0.933818790967208	0.513	0.096	0	SynTI	Sh3tc2
139	Maoa	0	0.931490998374973	0.561	0.113	0	SynTI	Maoa
140	Kdm2b	0	0.930771490241972	0.75	0.303	0	SynTI	Kdm2b
141	Osbpl3	0	0.929042185409663	0.649	0.22	0	SynTI	Osbpl3
142	Camk2d	0	0.92631503717678	0.85	0.445	0	SynTI	Camk2d
143	Zdbf2	0	0.925938486153622	0.467	0.109	0	SynTI	Zdbf2
144	Flvcr2	0	0.924574985521762	0.553	0.117	0	SynTI	Flvcr2
145	Slc4a4	0	0.924384155505772	0.391	0.045	0	SynTI	Slc4a4
146	Helz	0	0.922821443304626	0.97	0.74	0	SynTI	Helz
147	Kirrel	0	0.919506447479921	0.551	0.149	0	SynTI	Kirrel
148	Zfyve26	0	0.919128289019125	0.621	0.196	0	SynTI	Zfyve26
149	Mertk	0	0.918581282316249	0.584	0.144	0	SynTI	Mertk
150	Tspan5	0	0.916247187340117	0.364	0.089	0	SynTI	Tspan5
151	Zbtb16	0	0.907018425947443	0.393	0.08	0	SynTI	Zbtb16
152	Lmo7	0	0.904963248287232	0.594	0.215	0	SynTI	Lmo7
153	Pax2	0	0.904735238603107	0.339	0.017	0	SynTI	Pax2
154	Rab11fip3	0	0.898618114558246	0.584	0.18	0	SynTI	Rab11fip3
155	St5	0	0.89451096972834	0.676	0.297	0	SynTI	St5
156	Kazn	0	0.893396489639201	0.901	0.453	0	SynTI	Kazn
157	Tns1	0	0.89303193136546	0.946	0.589	0	SynTI	Tns1
158	Ppp2r3a	0	0.892765475774315	0.931	0.598	0	SynTI	Ppp2r3a
159	Atp6v0a1	0	0.890534544791637	0.66	0.213	0	SynTI	Atp6v0a1
160	Fam107b	0	0.890453556514	0.559	0.141	0	SynTI	Fam107b
161	Acvr2b	0	0.883143398988644	0.704	0.267	0	SynTI	Acvr2b
162	Prkce	0	0.880118732381209	0.908	0.509	0	SynTI	Prkce
163	Atxn2	0	0.878255909342024	0.933	0.625	0	SynTI	Atxn2
164	Slc38a1	0	0.875715480321434	0.983	0.735	0	SynTI	Slc38a1
165	Sh3tc1	0	0.87458750893523	0.438	0.059	0	SynTI	Sh3tc1
166	Plxnb1	0	0.867247523520527	0.703	0.256	0	SynTI	Plxnb1
167	Ubr4	0	0.866634371603541	0.758	0.385	0	SynTI	Ubr4
168	Dync1h1	0	0.865856404939859	0.838	0.477	0	SynTI	Dync1h1
169	Esrp1	0	0.864863698853417	0.603	0.19	0	SynTI	Esrp1
170	Arhgef3	0	0.853737891376481	0.847	0.462	0	SynTI	Arhgef3
171	Plbd1	0	0.850044108872988	0.405	0.044	0	SynTI	Plbd1
172	Pmepa1	0	0.848782058417298	0.498	0.122	0	SynTI	Pmepa1
173	Tulp4	0	0.846960666034408	0.844	0.468	0	SynTI	Tulp4
174	Nlk	0	0.846090277952801	0.87	0.546	0	SynTI	Nlk
175	Dlgap4	0	0.845168876243025	0.778	0.353	0	SynTI	Dlgap4
176	Epn1	0	0.842509025024086	0.663	0.254	0	SynTI	Epn1
177	Arhgef10l	0	0.841923186778259	0.408	0.056	0	SynTI	Arhgef10l
178	Usp48	0	0.832275214862719	0.833	0.436	0	SynTI	Usp48
179	Mme	0	0.829133559391887	0.394	0.06	0	SynTI	Mme
180	Tns4	0	0.82781233770047	0.371	0.038	0	SynTI	Tns4
181	Atp6v0b	0	0.827120461234794	0.59	0.194	0	SynTI	Atp6v0b
182	Ppp1r9a	0	0.825672644712978	0.857	0.466	0	SynTI	Ppp1r9a
183	Arhgap44	0	0.821926293404966	0.549	0.142	0	SynTI	Arhgap44
184	Agfg1	0	0.814617749829618	0.767	0.368	0	SynTI	Agfg1
185	Macf1	0	0.811698911346922	0.993	0.909	0	SynTI	Macf1
186	Steap3	0	0.811366608488136	0.327	0.024	0	SynTI	Steap3
187	Fam234a	0	0.81078615350743	0.523	0.168	0	SynTI	Fam234a
188	Leng8	0	0.80942962537337	0.752	0.378	0	SynTI	Leng8
189	Itpkb	0	0.809404060284346	0.37	0.034	0	SynTI	Itpkb
190	Eps8l2	0	0.808135984091541	0.908	0.542	0	SynTI	Eps8l2
191	Tmem116	0	0.808108301902323	0.44	0.12	0	SynTI	Tmem116
192	Cd320	0	0.805227491960475	0.398	0.059	0	SynTI	Cd320
193	Zc3h12c	0	0.804756576861162	0.426	0.075	0	SynTI	Zc3h12c
194	Mtmr10	0	0.80174229804871	0.482	0.116	0	SynTI	Mtmr10
195	Cnn3	0	0.801012240533076	0.531	0.128	0	SynTI	Cnn3
196	Slc16a9	0	0.799860264649128	0.409	0.059	0	SynTI	Slc16a9
197	Dennd4a	0	0.794578137725468	0.483	0.119	0	SynTI	Dennd4a
198	Grb10	0	0.792480675232594	0.778	0.42	0	SynTI	Grb10
199	Spen	0	0.790233698979301	0.838	0.471	0	SynTI	Spen
200	Mroh1	0	0.789165674255228	0.628	0.226	0	SynTI	Mroh1
201	Kif13a	0	0.784315832966815	0.854	0.53	0	SynTI	Kif13a
202	Lrch1	0	0.784075448941375	0.966	0.69	0	SynTI	Lrch1
203	Ankrd6	0	0.783257009082979	0.493	0.158	0	SynTI	Ankrd6
204	Fgfr2	0	0.78142944261095	0.834	0.513	0	SynTI	Fgfr2
205	Slc35f2	0	0.77770147051365	0.394	0.059	0	SynTI	Slc35f2
206	Polg	0	0.777449362230977	0.713	0.32	0	SynTI	Polg
207	Hivep2	0	0.777339796503428	0.597	0.242	0	SynTI	Hivep2
208	Snx8	0	0.774533988482017	0.41	0.087	0	SynTI	Snx8
209	Pax8	0	0.773968053045617	0.309	0.022	0	SynTI	Pax8
210	Cuedc1	0	0.771974106236924	0.64	0.238	0	SynTI	Cuedc1
211	Atp6v0d1	0	0.770229842111424	0.615	0.237	0	SynTI	Atp6v0d1
212	Maged1	0	0.769493413870076	0.74	0.306	0	SynTI	Maged1
213	Ankrd12	0	0.769028700158207	0.801	0.425	0	SynTI	Ankrd12
214	Adam19	0	0.767703159923611	0.749	0.306	0	SynTI	Adam19
215	Senp3	0	0.767210974197731	0.525	0.148	0	SynTI	Senp3
216	Lima1	0	0.765264124718276	0.942	0.658	0	SynTI	Lima1
217	Dlx4os	0	0.759889555377329	0.334	0.024	0	SynTI	Dlx4os
218	Nsf	0	0.759368387733712	0.779	0.431	0	SynTI	Nsf
219	Wwc2	0	0.755270455728263	0.944	0.658	0	SynTI	Wwc2
220	Epn2	0	0.754845443344864	0.616	0.247	0	SynTI	Epn2
221	Aco1	0	0.753388828803859	0.519	0.154	0	SynTI	Aco1
222	Myof	0	0.753112355983012	0.885	0.512	0	SynTI	Myof
223	Lipg	0	0.751215979654395	0.399	0.072	0	SynTI	Lipg
224	Epb41	0	0.750625420912895	0.874	0.617	0	SynTI	Epb41
225	Wwc1	0	0.748601097662755	0.754	0.373	0	SynTI	Wwc1
226	Fam90a1b	0	0.74785290744484	0.453	0.105	0	SynTI	Fam90a1b
227	Usp31	0	0.747600367037189	0.532	0.159	0	SynTI	Usp31
228	Svil	0	0.747383474525551	0.732	0.363	0	SynTI	Svil
229	Wwtr1	0	0.741776296336065	0.897	0.569	0	SynTI	Wwtr1
230	2010111I01Rik	0	0.735501685756357	0.768	0.407	0	SynTI	2010111I01Rik
231	Lzts2	0	0.735101205227961	0.657	0.282	0	SynTI	Lzts2
232	Tead3	0	0.734807902240508	0.504	0.134	0	SynTI	Tead3
233	Las1l	0	0.733917548967448	0.745	0.37	0	SynTI	Las1l
234	Slc22a4	0	0.733904397011659	0.331	0.042	0	SynTI	Slc22a4
235	Stx3	0	0.731672093405321	0.54	0.188	0	SynTI	Stx3
236	Tdrp	0	0.731165300903341	0.383	0.058	0	SynTI	Tdrp
237	Tns3	0	0.731034324521117	0.747	0.347	0	SynTI	Tns3
238	Dvl3	0	0.730074981113189	0.588	0.208	0	SynTI	Dvl3
239	Ccdc162	0	0.726497457334392	0.41	0.092	0	SynTI	Ccdc162
240	Eif4g1	0	0.725723556452798	0.927	0.677	0	SynTI	Eif4g1
241	Rdm1	0	0.723559197405753	0.629	0.272	0	SynTI	Rdm1
242	Smarca2	0	0.722829684719356	0.606	0.228	0	SynTI	Smarca2
243	Arhgef6	0	0.722783119925851	0.876	0.487	0	SynTI	Arhgef6
244	Fam105a	0	0.721469151040668	0.272	0.016	0	SynTI	Fam105a
245	Kif13b	0	0.720611711130421	0.809	0.45	0	SynTI	Kif13b
246	Wdfy3	0	0.719956002419389	0.949	0.719	0	SynTI	Wdfy3
247	Arhgef16	0	0.718332640507621	0.484	0.13	0	SynTI	Arhgef16
248	Pdgfb	0	0.716849113816038	0.305	0.03	0	SynTI	Pdgfb
249	Bbx	0	0.715577314514459	0.98	0.82	0	SynTI	Bbx
250	Asap2	0	0.714461490794308	0.499	0.151	0	SynTI	Asap2
251	Sorbs3	0	0.712069351564538	0.315	0.031	0	SynTI	Sorbs3
252	Slc11a2	0	0.711801048498245	0.38	0.066	0	SynTI	Slc11a2
253	Traf3	0	0.710154454304217	0.695	0.336	0	SynTI	Traf3
254	Pfdn1	0	0.710087108983148	0.553	0.196	0	SynTI	Pfdn1
255	Mfn1	0	0.70773702318412	0.49	0.146	0	SynTI	Mfn1
256	Ovol2	0	0.706733919741377	0.431	0.097	0	SynTI	Ovol2
257	Kmt2c	0	0.706621642328566	0.902	0.676	0	SynTI	Kmt2c
258	Fbxl20	0	0.704802267154405	0.516	0.184	0	SynTI	Fbxl20
259	Abhd16a	0	0.703277467196608	0.456	0.118	0	SynTI	Abhd16a
260	Ttll5	0	0.700186367790561	0.922	0.685	0	SynTI	Ttll5
261	St3gal6	0	0.697513024168656	0.379	0.081	0	SynTI	St3gal6
262	Slc7a7	0	0.696838949892853	0.449	0.125	0	SynTI	Slc7a7
263	Carmil1	0	0.695419100399883	0.902	0.648	0	SynTI	Carmil1
264	Neat1	0	0.691952224668017	0.938	0.656	0	SynTI	Neat1
265	Frmpd1	0	0.691329321908581	0.647	0.273	0	SynTI	Frmpd1
266	Smurf1	0	0.684109411814089	0.744	0.377	0	SynTI	Smurf1
267	Csf1r	0	0.680415040852252	0.497	0.139	0	SynTI	Csf1r
268	Nisch	0	0.679379027179087	0.831	0.543	0	SynTI	Nisch
269	Prr12	0	0.677036419193496	0.431	0.117	0	SynTI	Prr12
270	Gjb2	0	0.676939564959519	0.388	0.083	0	SynTI	Gjb2
271	Wnk4	0	0.676861341972442	0.267	0.014	0	SynTI	Wnk4
272	Arhgef37	0	0.676504383413128	0.31	0.048	0	SynTI	Arhgef37
273	Enah	0	0.674377105458458	0.865	0.571	0	SynTI	Enah
274	Lgmn	0	0.67289256011784	0.45	0.134	0	SynTI	Lgmn
275	Fgd4	0	0.66974351172299	0.816	0.505	0	SynTI	Fgd4
276	Chst8	0	0.665652061666136	0.29	0.04	0	SynTI	Chst8
277	Pard6b	0	0.665034680971456	0.333	0.045	0	SynTI	Pard6b
278	Hbegf	0	0.663033065456172	0.353	0.051	0	SynTI	Hbegf
279	Plat	0	0.660101367402375	0.291	0.028	0	SynTI	Plat
280	Slc26a7	0	0.657103898045504	0.286	0.026	0	SynTI	Slc26a7
281	Frs2	0	0.655966178824291	0.719	0.373	0	SynTI	Frs2
282	Llgl2	0	0.65444588143986	0.455	0.143	0	SynTI	Llgl2
283	Lgals8	0	0.651578288803903	0.395	0.101	0	SynTI	Lgals8
284	Nrcam	0	0.650563075783803	0.293	0.039	0	SynTI	Nrcam
285	Slc39a13	0	0.650318527635471	0.312	0.05	0	SynTI	Slc39a13
286	Macrod1	0	0.640582686545746	0.274	0.04	0	SynTI	Macrod1
287	Cmtm7	0	0.639513314694761	0.341	0.066	0	SynTI	Cmtm7
288	Lamb2	0	0.639136510842518	0.39	0.086	0	SynTI	Lamb2
289	Folr2	0	0.636479456377063	0.267	0.018	0	SynTI	Folr2
290	Reps2	0	0.636245421438139	0.482	0.149	0	SynTI	Reps2
291	Ripor3	0	0.6360251633807	0.305	0.041	0	SynTI	Ripor3
292	Mirt1	0	0.633558773344412	0.271	0.022	0	SynTI	Mirt1
293	Epb41l3	0	0.624958091970198	0.287	0.045	0	SynTI	Epb41l3
294	Dlg4	0	0.62465758878415	0.251	0.017	0	SynTI	Dlg4
295	Aebp1	0	0.62426539341068	0.254	0.021	0	SynTI	Aebp1
296	Epha4	0	0.623683172011992	0.412	0.089	0	SynTI	Epha4
297	Smtn	0	0.619574628009677	0.41	0.122	0	SynTI	Smtn
298	Ctnna1	0	0.610837106832926	0.93	0.73	0	SynTI	Ctnna1
299	Sema4b	0	0.60581195322904	0.332	0.066	0	SynTI	Sema4b
300	Sh3d21	0	0.600048753186394	0.274	0.029	0	SynTI	Sh3d21
301	Ifnlr1	0	0.598934848815881	0.261	0.032	0	SynTI	Ifnlr1
302	Smg1	0	0.59373826240679	0.906	0.711	0	SynTI	Smg1
303	Kif5a	0	0.591583504309208	0.292	0.049	0	SynTI	Kif5a
304	Zfand3	0	0.59050223748825	0.98	0.904	0	SynTI	Zfand3
305	Cacnb2	0	0.585783826466398	0.283	0.044	0	SynTI	Cacnb2
306	Slco2a1	0	0.582592929363236	0.627	0.195	0	SynTI	Slco2a1
307	Zdhhc1	0	0.578834747992514	0.28	0.047	0	SynTI	Zdhhc1
308	Bst2	0	0.574900381380584	0.331	0.072	0	SynTI	Bst2
309	Naga	0	0.566520536955656	0.288	0.053	0	SynTI	Naga
310	Sdc4	0	0.564987744441546	0.262	0.03	0	SynTI	Sdc4
311	Rab11fip4	0	0.561909902988646	0.256	0.022	0	SynTI	Rab11fip4
312	Phyhipl	0	0.543667936682687	0.258	0.04	0	SynTI	Phyhipl
313	Dlx3	0	0.531892390587571	0.269	0.046	0	SynTI	Dlx3
314	Pard3	0	0.509190189595942	0.985	0.913	0	SynTI	Pard3
315	Arhgap10	0	0.44761266764034	0.996	0.963	0	SynTI	Arhgap10
316	Tmem150a	0	0.33483303416067	0.619	0.193	0	SynTI	Tmem150a
317	Dhrs3	1.47008938907718e-306	0.573491148091816	0.324	0.076	3.16260330272174e-302	SynTI	Dhrs3
318	Patj	1.16240445489714e-305	0.624305662928031	0.821	0.517	2.50068070382022e-301	SynTI	Patj
319	Klc1	1.68978038882062e-305	0.632551144919619	0.709	0.353	3.63522455046979e-301	SynTI	Klc1
320	Parp4	5.17461487839121e-305	0.614947208504102	0.822	0.509	1.1132148987883e-300	SynTI	Parp4
321	Renbp	2.36683107169867e-304	0.587307697329895	0.36	0.095	5.09176368454535e-300	SynTI	Renbp
322	Optn	6.42425712609196e-303	0.668249852656942	0.641	0.295	1.38205043553616e-298	SynTI	Optn
323	Fry	4.55411706689017e-302	0.820446820430738	0.406	0.126	9.79727204600083e-298	SynTI	Fry
324	Rab24	1.25262972773337e-301	0.693238053350849	0.574	0.243	2.6947823332728e-297	SynTI	Rab24
325	Zim1	1.43202572231008e-301	0.673408809374541	0.591	0.255	3.08071693640568e-297	SynTI	Zim1
326	Vps8	7.72888635468941e-299	0.690685703827869	0.586	0.259	1.66271532148433e-294	SynTI	Vps8
327	St3gal5	5.42318458160129e-298	0.584453720445773	0.353	0.091	1.16668969903988e-293	SynTI	St3gal5
328	Dab2	9.96737280720702e-298	0.518332926100572	0.259	0.048	2.14428091201445e-293	SynTI	Dab2
329	Ncoa7	1.92090640739954e-296	0.697716397164555	0.526	0.206	4.13244595423863e-292	SynTI	Ncoa7
330	Cryl1	3.22457021411976e-296	0.666937707700306	0.415	0.127	6.93701790163583e-292	SynTI	Cryl1
331	Utrn	4.84894244254049e-295	0.590806729361486	0.909	0.75	1.04315298766374e-290	SynTI	Utrn
332	Arhgef18	5.26376095597892e-294	0.667070717322204	0.645	0.313	1.13239289445974e-289	SynTI	Arhgef18
333	Mark3	4.23442879509489e-293	0.547316684222	0.892	0.658	9.10952666688763e-289	SynTI	Mark3
334	Huwe1	7.14934314948968e-293	0.556235390594764	0.908	0.702	1.53803819174972e-288	SynTI	Huwe1
335	Tfeb	1.11565087555057e-292	0.613123159368294	0.438	0.142	2.40009972857194e-288	SynTI	Tfeb
336	Slc22a18	8.37318499161425e-292	0.552160474294842	0.333	0.08	1.80132328724597e-287	SynTI	Slc22a18
337	Slc16a1	1.77386584201966e-289	0.638389620666629	0.465	0.162	3.8161175859369e-285	SynTI	Slc16a1
338	Ass1	1.86204138229495e-287	0.581249824144751	0.363	0.1	4.00580962573112e-283	SynTI	Ass1
339	Psd4	9.25109867491452e-285	0.621395151022965	0.595	0.259	1.99018885793436e-280	SynTI	Psd4
340	Purg	9.26668008057357e-285	0.532544829967743	0.29	0.064	1.99354088573379e-280	SynTI	Purg
341	Tbc1d24	2.90753277546692e-283	0.510025522528795	0.26	0.052	6.25497525986199e-279	SynTI	Tbc1d24
342	Osbpl9	3.12153428774776e-275	0.615194195559744	0.699	0.374	6.71535671323175e-271	SynTI	Osbpl9
343	Arhgap42	7.03079187408742e-275	0.647578815314607	0.592	0.262	1.51253425587243e-270	SynTI	Arhgap42
344	Arhgap32	7.51852234176521e-274	0.581745980123355	0.414	0.134	1.61745971138395e-269	SynTI	Arhgap32
345	Rflnb	2.5963911824922e-271	0.513918165555405	0.287	0.066	5.58561635089546e-267	SynTI	Rflnb
346	Zfp710	1.01785441774602e-268	0.660305277112244	0.468	0.173	2.18971020889701e-264	SynTI	Zfp710
347	Pced1b	4.04257382187343e-267	0.653202726667341	0.439	0.156	8.6967890629963e-263	SynTI	Pced1b
348	Flcn	6.43846504082301e-264	0.554437736862843	0.304	0.077	1.38510698423225e-259	SynTI	Flcn
349	Eml2	2.80649640054927e-263	0.589226483457333	0.425	0.146	6.03761570650164e-259	SynTI	Eml2
350	Atp13a3	4.08844047731961e-263	0.594624276235915	0.751	0.453	8.79546199885768e-259	SynTI	Atp13a3
351	Plxna4	5.71936328432607e-262	0.526301013365737	0.316	0.081	1.23040662335707e-257	SynTI	Plxna4
352	Wipi2	6.58356451085232e-262	0.572808345105215	0.442	0.157	1.41632223321966e-257	SynTI	Wipi2
353	Fam214a	1.62641365989848e-261	0.613086802102329	0.61	0.283	3.4989037065396e-257	SynTI	Fam214a
354	Asap3	1.32982732097036e-258	0.525877629043718	0.641	0.29	2.86085751560353e-254	SynTI	Asap3
355	Slit3	2.72805209620598e-258	0.670591851734641	0.31	0.081	5.86885847456793e-254	SynTI	Slit3
356	Mark1	4.70631850542316e-258	0.520701674169057	0.28	0.066	1.01247030007168e-253	SynTI	Mark1
357	Slc23a2	8.39949949405761e-258	0.611157607285696	0.633	0.309	1.80698432615661e-253	SynTI	Slc23a2
358	Anxa5	1.83857791141578e-257	0.56569551642729	0.567	0.248	3.95533266082878e-253	SynTI	Anxa5
359	Snx30	5.20352593693145e-257	0.62796445284169	0.552	0.242	1.11943453481206e-252	SynTI	Snx30
360	Afap1l1	5.96966865093707e-257	0.509289194537303	0.368	0.107	1.28425481687609e-252	SynTI	Afap1l1
361	Peg3	9.02288883794402e-257	0.404491241766326	0.971	0.87	1.9410940757069e-252	SynTI	Peg3
362	Ubtd1	3.73269084242231e-256	0.65357823339171	0.544	0.24	8.03013780930311e-252	SynTI	Ubtd1
363	Tfdp2	3.73450045676691e-255	0.619504473796449	0.4	0.134	8.03403083264265e-251	SynTI	Tfdp2
364	Sin3b	5.86283871126343e-255	0.54751440182334	0.854	0.587	1.2612724919541e-250	SynTI	Sin3b
365	Slc39a10	1.09125124291108e-253	0.539080779515021	0.395	0.128	2.3476087988746e-249	SynTI	Slc39a10
366	Vmp1	8.77608524593662e-253	0.598011070765751	0.726	0.426	1.88799921895835e-248	SynTI	Vmp1
367	Daam1	2.86598257565449e-252	0.512598488959766	0.873	0.634	6.16558831500551e-248	SynTI	Daam1
368	Stxbp2	2.94958635264352e-252	0.574342521466696	0.422	0.148	6.34544512044201e-248	SynTI	Stxbp2
369	Sptbn1	2.93755751104073e-251	0.556504493413732	0.774	0.476	6.31956747350193e-247	SynTI	Sptbn1
370	Parvb	2.97542315232123e-251	0.591715813402196	0.39	0.127	6.40102782758866e-247	SynTI	Parvb
371	Clcn5	3.02415298924206e-250	0.628696535131981	0.49	0.198	6.50586032575644e-246	SynTI	Clcn5
372	Slc6a6	3.17061763403839e-250	0.555658695231028	0.771	0.457	6.82094971610678e-246	SynTI	Slc6a6
373	Efna5	1.07580831091338e-249	0.665391659148983	0.39	0.13	2.31438641926796e-245	SynTI	Efna5
374	Tpd52	3.30218397536503e-249	0.603370015689894	0.655	0.339	7.10398838620278e-245	SynTI	Tpd52
375	Agfg2	5.04192469112453e-248	0.559356572634136	0.449	0.163	1.08466925880162e-243	SynTI	Agfg2
376	Rnf128	1.04035142116292e-247	0.537547400352165	0.736	0.404	2.23810801234779e-243	SynTI	Rnf128
377	Sorbs1	2.28904014068404e-247	0.390716371779952	0.885	0.559	4.92441205465358e-243	SynTI	Sorbs1
378	Srsf1	2.47230878507508e-247	0.624115309522774	0.542	0.239	5.31867788933201e-243	SynTI	Srsf1
379	Shtn1	8.13902429432044e-247	0.599125094472751	0.535	0.228	1.75094829643716e-242	SynTI	Shtn1
380	Lpar1	9.08344698399923e-247	0.527151460515018	0.379	0.119	1.95412194966775e-242	SynTI	Lpar1
381	Srgap3	8.26629696607454e-246	0.567861784686916	0.821	0.55	1.77832846631162e-241	SynTI	Srgap3
382	Dhx40	1.17959123494301e-245	0.546795257352256	0.364	0.115	2.5376546237329e-241	SynTI	Dhx40
383	Cyth1	2.93342160671356e-244	0.593028082304835	0.506	0.209	6.31066990252289e-240	SynTI	Cyth1
384	Mtor	1.80529886137368e-243	0.606900903359004	0.635	0.327	3.8837394404732e-239	SynTI	Mtor
385	Hook2	2.11414961977711e-242	0.552308949873571	0.406	0.138	4.54817007702649e-238	SynTI	Hook2
386	Syngr1	2.95212469469946e-242	0.533174061390008	0.351	0.108	6.35090585570694e-238	SynTI	Syngr1
387	Nbeal1	5.98420909212745e-242	0.558002896402623	0.555	0.247	1.28738290198938e-237	SynTI	Nbeal1
388	Osbpl2	3.668172241403e-241	0.56589068581829	0.44	0.163	7.89133894293028e-237	SynTI	Osbpl2
389	Mfge8	2.70425440631177e-240	0.46866071698061	0.276	0.067	5.81766250429851e-236	SynTI	Mfge8
390	Nhs	5.99083948189588e-240	0.292863302110959	0.851	0.513	1.28880929774026e-235	SynTI	Nhs
391	Myo6	1.06763409846047e-239	0.490404221260035	0.305	0.082	2.29680123601801e-235	SynTI	Myo6
392	Lncpint	2.87734333520998e-237	0.6252813327984	0.435	0.165	6.19002871703722e-233	SynTI	Lncpint
393	Map3k5	2.28174968334972e-236	0.599495192854235	0.418	0.153	4.90872809379026e-232	SynTI	Map3k5
394	Srr	8.68500308942133e-236	0.554497266921105	0.509	0.214	1.86840471462721e-231	SynTI	Srr
395	Fabp3	5.64612208272692e-234	0.456141079563813	0.278	0.069	1.21465024365704e-229	SynTI	Fabp3
396	Tnk2	1.68480013463747e-233	0.580958472616513	0.587	0.276	3.62451052964559e-229	SynTI	Tnk2
397	Atxn10	3.04278146186479e-233	0.379257374089589	0.978	0.921	6.54593575890971e-229	SynTI	Atxn10
398	Parm1	3.2054527501937e-233	0.560044460238796	0.721	0.412	6.89589050149171e-229	SynTI	Parm1
399	Rab12	2.63242155110908e-232	0.567238265051806	0.517	0.225	5.66312848290097e-228	SynTI	Rab12
400	Stat1	2.0769267340278e-231	0.554216217257735	0.387	0.134	4.46809248291401e-227	SynTI	Stat1
401	Khnyn	2.21103521709539e-230	0.570283859220114	0.535	0.241	4.75660006253732e-226	SynTI	Khnyn
402	Ppm1h	4.49253437024165e-230	0.475251074988463	0.496	0.196	9.66478919070086e-226	SynTI	Ppm1h
403	Crebrf	1.1144671056453e-229	0.539686794471795	0.417	0.152	2.39755308437473e-225	SynTI	Crebrf
404	Pxmp4	3.30264460816382e-228	0.501393784243861	0.275	0.072	7.10497934554283e-224	SynTI	Pxmp4
405	Itsn1	8.46836948627263e-226	0.557609375660578	0.627	0.323	1.82180032758183e-221	SynTI	Itsn1
406	Ipmk	2.68859133076889e-225	0.54458119219945	0.372	0.126	5.78396652988312e-221	SynTI	Ipmk
407	Ncoa3	4.8483715586785e-225	0.55290996613501	0.502	0.215	1.0430301734185e-220	SynTI	Ncoa3
408	Pdzd2	1.70834818137203e-224	0.507896283414051	0.289	0.078	3.67516944258564e-220	SynTI	Pdzd2
409	Whamm	2.56621153853613e-224	0.544735188142196	0.378	0.131	5.52069088285278e-220	SynTI	Whamm
410	Ubr5	2.42417647365789e-222	0.499906775349783	0.852	0.66	5.21513084778022e-218	SynTI	Ubr5
411	Snx29	2.08931520969795e-221	0.578264397404034	0.643	0.342	4.49474381062319e-217	SynTI	Snx29
412	Capn2	3.02354523719525e-221	0.448656018697654	0.266	0.068	6.50455286877814e-217	SynTI	Capn2
413	Stim1	3.21124666270339e-220	0.596159727385222	0.622	0.335	6.9083549454738e-216	SynTI	Stim1
414	Arap2	3.29433999355682e-217	0.554503677633645	0.584	0.287	7.08711362813879e-213	SynTI	Arap2
415	Bclaf3	2.81271794467904e-216	0.506878321919144	0.81	0.54	6.05100011438802e-212	SynTI	Bclaf3
416	Pex14	2.50273773749956e-215	0.434856902515255	0.949	0.807	5.38413969468281e-211	SynTI	Pex14
417	Malat1	2.16170869358356e-214	0.253413202743934	1	1	4.65048391250631e-210	SynTI	Malat1
418	Dnajb6	4.57112709096635e-211	0.494214734823316	0.797	0.534	9.83386571079591e-207	SynTI	Dnajb6
419	Pard3b	7.08393054295859e-211	0.622525429657231	0.455	0.191	1.52396597770668e-206	SynTI	Pard3b
420	Tmcc3	9.77653978137535e-211	0.391570723559993	0.822	0.505	2.10322700316728e-206	SynTI	Tmcc3
421	Cux1	2.52466240319975e-210	0.384901773780764	0.967	0.816	5.43130622800361e-206	SynTI	Cux1
422	Prkci	3.20977161288241e-210	0.488428415876826	0.436	0.172	6.90518167079394e-206	SynTI	Prkci
423	Abi2	3.67789153027935e-210	0.540955455404977	0.411	0.158	7.91224804908997e-206	SynTI	Abi2
424	Abcc1	3.79201991083192e-210	0.510521507871737	0.487	0.207	8.15777243417271e-206	SynTI	Abcc1
425	AU018091	7.15359493605144e-210	0.441106027661244	0.264	0.07	1.53895287859275e-205	SynTI	AU018091
426	Bsg	1.94743556464764e-209	0.489718660979211	0.446	0.178	4.18951813022646e-205	SynTI	Bsg
427	Strada	3.55373585795106e-209	0.509417226265143	0.406	0.156	7.64515195121012e-205	SynTI	Strada
428	Srrm2	3.60167389215629e-209	0.482009203714835	0.935	0.849	7.74828104419583e-205	SynTI	Srrm2
429	Pepd	4.97434302849762e-209	0.559897909608029	0.541	0.255	1.07013041572069e-204	SynTI	Pepd
430	Uevld	6.9527807442411e-209	0.5146562154407	0.484	0.209	1.49575172150859e-204	SynTI	Uevld
431	Zfp697	1.63120658762611e-208	0.498979242507204	0.423	0.163	3.50921473196005e-204	SynTI	Zfp697
432	Mbnl3	2.04579846493979e-208	0.425648985496862	0.866	0.631	4.40112623762497e-204	SynTI	Mbnl3
433	Mov10	2.1990356930156e-206	0.53786119145191	0.433	0.175	4.73078548638447e-202	SynTI	Mov10
434	Wipf2	5.70604727857154e-206	0.607862305152722	0.481	0.213	1.2275419510391e-201	SynTI	Wipf2
435	Phc3	7.23471005598321e-206	0.558598465938118	0.486	0.216	1.55640317434367e-201	SynTI	Phc3
436	Oxct1	2.08908813046297e-203	0.553562576591749	0.442	0.182	4.49425529506498e-199	SynTI	Oxct1
437	D10Wsu102e	1.02064062972971e-202	0.55285813652847	0.674	0.39	2.19570418673753e-198	SynTI	D10Wsu102e
438	Fhod1	5.59825637231843e-202	0.49851924978986	0.363	0.13	1.20435289337686e-197	SynTI	Fhod1
439	Ctsa	2.38185961880446e-201	0.525569766219414	0.426	0.17	5.12409459793404e-197	SynTI	Ctsa
440	Dnase1l1	7.91650864315294e-201	0.467623482777751	0.278	0.08	1.70307850440149e-196	SynTI	Dnase1l1
441	Pdlim1	2.20608089841406e-199	0.455966337538972	0.767	0.466	4.74594183675818e-195	SynTI	Pdlim1
442	Itga5	2.85698387484469e-199	0.509446044677783	0.555	0.267	6.14622940995337e-195	SynTI	Itga5
443	Slc17a5	3.24135018296972e-198	0.45573297667969	0.284	0.084	6.97311664862275e-194	SynTI	Slc17a5
444	Nabp1	8.89957486754272e-198	0.511454735686495	0.47	0.204	1.91456554125447e-193	SynTI	Nabp1
445	Mpp5	1.09242283520537e-197	0.512312043171756	0.468	0.203	2.35012924537732e-193	SynTI	Mpp5
446	Hs6st1	2.15805492232683e-196	0.459898097819574	0.276	0.08	4.6426235544017e-192	SynTI	Hs6st1
447	Rgl1	3.949368992344e-195	0.482704940944524	0.653	0.34	8.49627751322964e-191	SynTI	Rgl1
448	Ltv1	1.0087129946024e-194	0.431583828280838	0.271	0.077	2.17004426528814e-190	SynTI	Ltv1
449	Tbc1d14	2.02156999004817e-194	0.510593711846677	0.343	0.121	4.34900351959062e-190	SynTI	Tbc1d14
450	5031425E22Rik	1.32531958010028e-193	0.513277636735351	0.768	0.536	2.85116001266973e-189	SynTI	5031425E22Rik
451	Smyd3	8.25480869272245e-188	0.516557180034237	0.83	0.6	1.77585699406538e-183	SynTI	Smyd3
452	Usp29	1.49424425029389e-187	0.540981299001425	0.572	0.295	3.21456765565724e-183	SynTI	Usp29
453	Ubac2	5.47764557604767e-187	0.523753296960145	0.68	0.409	1.17840589277514e-182	SynTI	Ubac2
454	Eif2ak3	8.88059406593036e-187	0.51453957274647	0.489	0.224	1.9104822014036e-182	SynTI	Eif2ak3
455	Rnf214	1.052297167215e-184	0.513948286732988	0.501	0.238	2.26380689582962e-180	SynTI	Rnf214
456	Limk2	1.44166138517598e-184	0.478885481987397	0.747	0.476	3.10144613792908e-180	SynTI	Limk2
457	Idh2	6.98852273254169e-184	0.456100288033795	0.317	0.107	1.50344089545169e-179	SynTI	Idh2
458	Sntb1	1.60447224033402e-183	0.522749615481647	0.257	0.075	3.45170113063058e-179	SynTI	Sntb1
459	Mob3c	3.96685878434944e-182	0.419739794220885	0.268	0.081	8.53390330277095e-178	SynTI	Mob3c
460	Dennd4c	4.7719422953424e-181	0.498585787185077	0.624	0.351	1.02658794599701e-176	SynTI	Dennd4c
461	Ap3s1	8.21744460034424e-181	0.483531281463331	0.385	0.154	1.76781885687206e-176	SynTI	Ap3s1
462	Adar	6.3824524114908e-179	0.451624032015878	0.3	0.101	1.37305698728402e-174	SynTI	Adar
463	Elf1	7.1925538378067e-179	0.415246509615437	0.805	0.505	1.54733410712736e-174	SynTI	Elf1
464	Fchsd2	9.34536798914118e-179	0.467791562343157	0.785	0.532	2.01046901550394e-174	SynTI	Fchsd2
465	Ttc3	2.93149555055311e-178	0.496684967733708	0.644	0.375	6.30652637790491e-174	SynTI	Ttc3
466	Cdk16	1.05983982740932e-176	0.469285828366993	0.375	0.148	2.28003342070568e-172	SynTI	Cdk16
467	Kdsr	1.07934943846726e-176	0.409686372947975	0.27	0.083	2.32200444697461e-172	SynTI	Kdsr
468	Ckb	3.2181069611807e-176	0.447980734168147	0.291	0.096	6.92311350558805e-172	SynTI	Ckb
469	Psap	3.29707867631648e-176	0.483180234935499	0.686	0.416	7.09300535635965e-172	SynTI	Psap
470	Evi5	3.33846959680261e-176	0.552232631432166	0.56	0.306	7.18204964360145e-172	SynTI	Evi5
471	Acadm	1.78100828920295e-175	0.461519309878472	0.421	0.178	3.83148313256231e-171	SynTI	Acadm
472	Scamp5	3.14411882201166e-174	0.383984388438546	0.254	0.074	6.76394282179367e-170	SynTI	Scamp5
473	Cystm1	7.67056461067639e-174	0.481870003763749	0.485	0.229	1.65016856469481e-169	SynTI	Cystm1
474	Tmbim1	6.45037154506855e-173	0.42400290369568	0.297	0.1	1.3876684304906e-168	SynTI	Tmbim1
475	Vgll3	1.42535485033133e-172	0.38617819601224	0.306	0.102	3.06636588951779e-168	SynTI	Vgll3
476	Atg4c	1.93925665258969e-172	0.481962887242853	0.376	0.151	4.17192283671621e-168	SynTI	Atg4c
477	Kdm5c	9.08924301146351e-172	0.475222112031942	0.698	0.435	1.95536884905614e-167	SynTI	Kdm5c
478	Myl6	6.29225578110945e-171	0.476751964437094	0.43	0.188	1.35365298619008e-166	SynTI	Myl6
479	Srek1	8.4369480598805e-170	0.44666321961379	0.791	0.571	1.81504063612209e-165	SynTI	Srek1
480	Rbpj	1.29145858550972e-168	0.482753493069684	0.449	0.205	2.77831485500706e-164	SynTI	Rbpj
481	Jazf1	4.2704809529601e-168	0.429345737106939	0.884	0.687	9.18708567410306e-164	SynTI	Jazf1
482	Prrg2	1.00363702654568e-167	0.404443959097608	0.251	0.076	2.15912433520772e-163	SynTI	Prrg2
483	Dlg1	2.02031388085914e-167	0.452036250906401	0.771	0.547	4.34630125189227e-163	SynTI	Dlg1
484	Suclg2	2.12356015037588e-167	0.471663656885855	0.695	0.425	4.56841495150364e-163	SynTI	Suclg2
485	Mef2d	8.01757664216883e-166	0.471558170023312	0.647	0.374	1.72482126302978e-161	SynTI	Mef2d
486	Git2	2.88171341953513e-165	0.413586964315155	0.842	0.612	6.19943007944592e-161	SynTI	Git2
487	Pja2	5.09782413615725e-165	0.461107819829162	0.502	0.246	1.09669490641151e-160	SynTI	Pja2
488	Zfp292	3.1676458663264e-164	0.493292628591334	0.592	0.327	6.81455655222799e-160	SynTI	Zfp292
489	Tinagl1	6.65343890201069e-164	0.397564632805611	0.37	0.146	1.43135431098956e-159	SynTI	Tinagl1
490	Micu1	3.05426299226398e-162	0.464252484694994	0.65	0.385	6.5706359752575e-158	SynTI	Micu1
491	Gkap1	3.59479264602229e-162	0.50326102421868	0.661	0.402	7.73347741938775e-158	SynTI	Gkap1
492	Aplp2	2.87841016601039e-161	0.465685375860517	0.564	0.305	6.19232379013815e-157	SynTI	Aplp2
493	Spg11	3.4685167298539e-161	0.450627859770799	0.418	0.185	7.46182004093469e-157	SynTI	Spg11
494	Eci2	6.17252218756783e-161	0.441180761053194	0.303	0.11	1.32789469821147e-156	SynTI	Eci2
495	Mtmr4	1.02173353291889e-160	0.440616396373908	0.361	0.147	2.19805534936841e-156	SynTI	Mtmr4
496	Eps15	5.60996167451577e-159	0.452292695160675	0.629	0.366	1.20687105503858e-154	SynTI	Eps15
497	Slc4a2	1.00117182606922e-157	0.32837160856122	0.532	0.266	2.15382094942271e-153	SynTI	Slc4a2
498	Cnn2	2.77500158150786e-157	0.430079566727069	0.418	0.183	5.96986090229787e-153	SynTI	Cnn2
499	Mgrn1	9.85813001200716e-157	0.410293400295625	0.372	0.152	2.1207795094831e-152	SynTI	Mgrn1
500	Yap1	1.14663898539423e-156	0.454699691591216	0.612	0.355	2.4667644492786e-152	SynTI	Yap1
501	Bag6	1.5307665483443e-155	0.422816843816438	0.272	0.093	3.2931380754531e-151	SynTI	Bag6
502	Rnf111	1.43418794980862e-154	0.458992868960739	0.66	0.412	3.08536853642328e-150	SynTI	Rnf111
503	Gpx4	1.47358846066113e-154	0.418059108858419	0.315	0.118	3.17013085542029e-150	SynTI	Gpx4
504	Hadh	2.13365232156162e-154	0.420671862878235	0.285	0.101	4.5901262393755e-150	SynTI	Hadh
505	Ablim1	9.38610853668398e-154	0.448488622174421	0.258	0.084	2.01923352949683e-149	SynTI	Ablim1
506	Flii	2.51743921060865e-152	0.402978952030882	0.298	0.108	5.41576697378239e-148	SynTI	Flii
507	Kidins220	7.92661119175261e-152	0.460662355355533	0.504	0.259	1.70525186568174e-147	SynTI	Kidins220
508	Ggnbp2	1.49262322807038e-149	0.422718272132117	0.73	0.496	3.21108035054782e-145	SynTI	Ggnbp2
509	Ankrd13c	1.52588181106875e-149	0.452896439655248	0.539	0.29	3.28262954015219e-145	SynTI	Ankrd13c
510	Arhgef10	2.06260884626972e-149	0.431481628437755	0.315	0.122	4.43729041098005e-145	SynTI	Arhgef10
511	Myo1b	5.23203091508091e-149	0.395233877082784	0.817	0.584	1.12556681076136e-144	SynTI	Myo1b
512	Mtch1	1.04249389460277e-148	0.365749976607078	0.301	0.11	2.24271711545893e-144	SynTI	Mtch1
513	Ube2r2	2.20323535273248e-148	0.443284670077799	0.721	0.484	4.73982021433338e-144	SynTI	Ube2r2
514	Ppp1r37	1.60359805560085e-147	0.449046753621932	0.459	0.225	3.44982049701412e-143	SynTI	Ppp1r37
515	Csnk1g3	1.28462523118322e-146	0.455184332715637	0.657	0.413	2.76361425984446e-142	SynTI	Csnk1g3
516	Irak2	4.5302235223773e-146	0.457939553729344	0.423	0.2	9.74586986369028e-142	SynTI	Irak2
517	Phlpp1	1.69988502823474e-145	0.434591551380874	0.65	0.393	3.65696266124139e-141	SynTI	Phlpp1
518	Zswim8	2.79349992158907e-145	0.469867069902722	0.543	0.299	6.00965638131458e-141	SynTI	Zswim8
519	D5Ertd579e	1.22064367169444e-144	0.453573565118884	0.746	0.515	2.62597073091625e-140	SynTI	D5Ertd579e
520	Brap	4.31103408961995e-144	0.422330307519185	0.357	0.152	9.27432763699941e-140	SynTI	Brap
521	Lrba	5.41491406378152e-144	0.424815404442381	0.734	0.503	1.16491046254132e-139	SynTI	Lrba
522	Ddr1	2.23140711670486e-143	0.46666979956341	0.456	0.226	4.80042613016716e-139	SynTI	Ddr1
523	Slc38a2	8.16747958697756e-143	0.442037554397618	0.592	0.34	1.75706988354648e-138	SynTI	Slc38a2
524	Atp6v1b2	1.96384881117763e-142	0.415712043433108	0.388	0.173	4.22482794748645e-138	SynTI	Atp6v1b2
525	Epb41l5	6.3201824972764e-142	0.374430229828029	0.283	0.102	1.35966086063907e-137	SynTI	Epb41l5
526	Dnmbp	2.09054627519876e-141	0.464974046274989	0.552	0.312	4.49739220183509e-137	SynTI	Dnmbp
527	Hibadh	2.75574460608738e-141	0.451712221798624	0.656	0.417	5.92843337107578e-137	SynTI	Hibadh
528	Dot1l	3.1536317658386e-141	0.435947085314525	0.497	0.259	6.78440801784858e-137	SynTI	Dot1l
529	Cep170b	3.72960809210057e-141	0.352063175482245	0.254	0.085	8.02350588853596e-137	SynTI	Cep170b
530	Susd6	1.24691546432013e-140	0.404574719371661	0.584	0.331	2.6824892383919e-136	SynTI	Susd6
531	Golgb1	1.92558836113098e-140	0.431299378942078	0.77	0.542	4.14251824130107e-136	SynTI	Golgb1
532	Csnk1e	3.08006380367071e-140	0.415011535693793	0.453	0.221	6.6261412608368e-136	SynTI	Csnk1e
533	Bcor	6.29277778191115e-139	0.324613307054449	0.597	0.326	1.35376528422255e-134	SynTI	Bcor
534	Adnp2	1.54899084004054e-137	0.393898923991715	0.329	0.135	3.33234399417922e-133	SynTI	Adnp2
535	Nsmce2	4.72995102099694e-136	0.428164735723261	0.73	0.504	1.01755436314707e-131	SynTI	Nsmce2
536	Pcgf5	2.91375621249719e-135	0.395187153725588	0.741	0.508	6.26836373994521e-131	SynTI	Pcgf5
537	Xlr4b	3.13263981730602e-135	0.432256455871818	0.301	0.12	6.73924803897043e-131	SynTI	Xlr4b
538	Slc2a1	1.55925089929282e-134	0.397790076398649	0.647	0.384	3.35441645964864e-130	SynTI	Slc2a1
539	Arid3b	1.66123932601031e-134	0.379443952604447	0.305	0.121	3.57382416204599e-130	SynTI	Arid3b
540	Prrc2a	3.44253113479472e-134	0.427881255172387	0.594	0.351	7.40591723028389e-130	SynTI	Prrc2a
541	Cnst	4.40875531461927e-134	0.367711501201952	0.274	0.101	9.48455530834045e-130	SynTI	Cnst
542	Pip5k1b	4.76613048721827e-134	0.547906384050069	0.467	0.251	1.02533765171527e-129	SynTI	Pip5k1b
543	Cdk5	1.84736031774416e-132	0.35259134350112	0.278	0.104	3.974226251563e-128	SynTI	Cdk5
544	Cdkn1c	9.21349488870316e-132	0.428877301343134	0.683	0.44	1.98209915540671e-127	SynTI	Cdkn1c
545	Cep350	1.01262158283972e-131	0.40494477595803	0.705	0.465	2.17845281116309e-127	SynTI	Cep350
546	Anapc2	3.80633368997356e-131	0.375912705924867	0.292	0.115	8.18856566724012e-127	SynTI	Anapc2
547	Inppl1	1.26489897731627e-130	0.373330664381933	0.33	0.138	2.72117716990048e-126	SynTI	Inppl1
548	Pan3	3.94979025368197e-130	0.353553411853406	0.876	0.741	8.49718377274602e-126	SynTI	Pan3
549	Smchd1	1.38076190798888e-129	0.365225224939318	0.815	0.617	2.97043309265647e-125	SynTI	Smchd1
550	Ctr9	1.64001875313844e-129	0.401453287482862	0.443	0.221	3.52817234362672e-125	SynTI	Ctr9
551	Pag1	2.82297348416967e-129	0.400034556506502	0.39	0.179	6.07306285649421e-125	SynTI	Pag1
552	Ston2	4.19417249962212e-129	0.257558262282027	0.392	0.172	9.02292329843706e-125	SynTI	Ston2
553	Sbno1	5.10816976119944e-127	0.383482970146387	0.701	0.469	1.09892056072684e-122	SynTI	Sbno1
554	Aig1	1.86616524955491e-126	0.434727951230474	0.434	0.219	4.01468130136748e-122	SynTI	Aig1
555	Rad51b	2.55633284816697e-126	0.418400440875608	0.715	0.487	5.49943885626161e-122	SynTI	Rad51b
556	Irak1	4.22329189837589e-126	0.384979493708991	0.293	0.118	9.08556786097605e-122	SynTI	Irak1
557	Snx27	1.2527501697368e-125	0.414203790130732	0.627	0.395	2.69504144015478e-121	SynTI	Snx27
558	Nrbp1	2.16673941272745e-125	0.403110301480748	0.347	0.155	4.66130649860056e-121	SynTI	Nrbp1
559	Klf9	9.33004182828583e-125	0.345031628943578	0.256	0.094	2.00717189851913e-120	SynTI	Klf9
560	Ddhd2	1.4965469330029e-124	0.422684643959676	0.577	0.346	3.21952141696914e-120	SynTI	Ddhd2
561	Afap1	1.79292740732041e-123	0.345398560574738	0.821	0.586	3.85712473136839e-119	SynTI	Afap1
562	Bin2	2.63231105798558e-123	0.438210818191366	0.373	0.176	5.66289077904439e-119	SynTI	Bin2
563	Rab10	3.31090397945319e-123	0.426098631856304	0.777	0.599	7.12274773099766e-119	SynTI	Rab10
564	Tra2a	6.38700726813403e-123	0.341733441664834	0.848	0.682	1.37403687359367e-118	SynTI	Tra2a
565	2810474O19Rik	1.09667944825285e-122	0.405633128911743	0.384	0.184	2.35928649702636e-118	SynTI	2810474O19Rik
566	Inpp4a	2.30728617772084e-122	0.405566128561432	0.389	0.186	4.96366475413083e-118	SynTI	Inpp4a
567	Taz	2.79656850229645e-122	0.387604928604181	0.323	0.14	6.01625781899035e-118	SynTI	Taz
568	Fhdc1	2.79961212722399e-122	0.36554805866869	0.342	0.151	6.02280556929698e-118	SynTI	Fhdc1
569	Serpine2	7.40633385798203e-122	0.391443720483127	0.48	0.252	1.59332460286767e-117	SynTI	Serpine2
570	Ncoa2	9.48907614441066e-122	0.309715068404602	0.82	0.611	2.04138495094707e-117	SynTI	Ncoa2
571	Dgke	1.3157005881861e-121	0.379047814036637	0.344	0.153	2.83046667536476e-117	SynTI	Dgke
572	Gpatch1	2.1760655943879e-121	0.365726862064385	0.317	0.136	4.68136991320668e-117	SynTI	Gpatch1
573	Kcnq5	4.41508295186744e-121	0.619350025783852	0.324	0.143	9.49816795435241e-117	SynTI	Kcnq5
574	Phlpp2	5.78633331177681e-121	0.384063005825944	0.534	0.302	1.24481388536254e-116	SynTI	Phlpp2
575	Gadd45g	9.41970511270262e-121	0.352139830821974	0.339	0.15	2.02646116089572e-116	SynTI	Gadd45g
576	Lmbrd1	9.56303175363886e-121	0.359202680152347	0.313	0.133	2.05729502116033e-116	SynTI	Lmbrd1
577	Lonp2	9.74296275764575e-121	0.372348143321899	0.788	0.593	2.09600357805233e-116	SynTI	Lonp2
578	Zzef1	9.91327610612641e-121	0.384410523620814	0.683	0.451	2.13264308871097e-116	SynTI	Zzef1
579	Psmd2	5.6075366369742e-120	0.3700971659031	0.272	0.108	1.20634935671226e-115	SynTI	Psmd2
580	Ehd1	1.44047421543355e-119	0.348714482183496	0.284	0.113	3.0988921796622e-115	SynTI	Ehd1
581	Peg10	2.23702134327625e-119	0.36305786793968	0.828	0.64	4.8125040157902e-115	SynTI	Peg10
582	Snx7	2.68814559114637e-119	0.408363216372891	0.419	0.212	5.78300761023318e-115	SynTI	Snx7
583	Ppp1cb	5.68426728182237e-119	0.386903645663805	0.583	0.354	1.22285642033845e-114	SynTI	Ppp1cb
584	Eif2s3y	9.89989338413999e-119	0.421498336477518	0.259	0.101	2.12976406373004e-114	SynTI	Eif2s3y
585	Dmxl1	1.05222195711871e-118	0.379768190727701	0.673	0.452	2.26364509634947e-114	SynTI	Dmxl1
586	Krt7	9.56139930260574e-118	0.373050539670636	0.331	0.148	2.05694383196957e-113	SynTI	Krt7
587	Ptdss1	6.36798634996301e-117	0.415475265634241	0.348	0.162	1.36994490346754e-112	SynTI	Ptdss1
588	Hprt	5.92495399137955e-116	0.340909404207831	0.301	0.126	1.27463535216548e-111	SynTI	Hprt
589	Pptc7	1.21222784097363e-115	0.391957758987946	0.331	0.151	2.60786575428656e-111	SynTI	Pptc7
590	Pdpk1	1.42650444059498e-115	0.395479080506295	0.596	0.375	3.06883900305199e-111	SynTI	Pdpk1
591	Bri3	1.73038893138131e-115	0.344657231291685	0.263	0.103	3.72258570808061e-111	SynTI	Bri3
592	Camsap2	2.81561067797907e-115	0.388494939777223	0.376	0.182	6.05722325153637e-111	SynTI	Camsap2
593	Extl3	5.50317564035485e-115	0.444655074220592	0.319	0.145	1.18389817550954e-110	SynTI	Extl3
594	Sgce	2.1128344343021e-114	0.414932474821295	0.488	0.274	4.5453407185141e-110	SynTI	Sgce
595	Sptan1	3.51368903029625e-114	0.359951378365422	0.569	0.332	7.55899921087632e-110	SynTI	Sptan1
596	Rgcc	2.73712433230365e-113	0.346825407562786	0.295	0.124	5.88837557608484e-109	SynTI	Rgcc
597	Tnfrsf21	5.54122973728598e-113	0.355044758062357	0.287	0.12	1.19208475338233e-108	SynTI	Tnfrsf21
598	Tgm2	7.41199998844177e-113	0.328114112857015	0.415	0.206	1.59454355751348e-108	SynTI	Tgm2
599	Mkl1	7.79067158568687e-113	0.329452944875667	0.845	0.678	1.67600717822882e-108	SynTI	Mkl1
600	Slc7a5	8.99699226601702e-113	0.331717260144102	0.298	0.125	1.93552294618824e-108	SynTI	Slc7a5
601	Slc45a4	1.03046901534279e-112	0.292891723064754	0.396	0.187	2.21684799270695e-108	SynTI	Slc45a4
602	Myo5b	5.29262059930646e-111	0.368908475836207	0.391	0.192	1.1386014695288e-106	SynTI	Myo5b
603	Stk4	5.65728326030119e-111	0.39562150411557	0.421	0.22	1.2170513477886e-106	SynTI	Stk4
604	Kif21a	1.65808394751196e-110	0.346617692586424	0.369	0.174	3.56703599628248e-106	SynTI	Kif21a
605	Gdpd5	5.02453664839116e-110	0.33918178875923	0.319	0.141	1.08092856916839e-105	SynTI	Gdpd5
606	Numb	9.06367683441525e-110	0.331309408032777	0.797	0.61	1.94986879738775e-105	SynTI	Numb
607	Appl2	1.01927320847968e-109	0.344497107545453	0.271	0.112	2.19276245340234e-105	SynTI	Appl2
608	Zmynd11	1.13118994614389e-109	0.374680906493702	0.345	0.163	2.43352893113934e-105	SynTI	Zmynd11
609	Nhsl1	1.38876715430748e-109	0.269693310465268	0.7	0.446	2.98765477906168e-105	SynTI	Nhsl1
610	Epc1	1.52123571938508e-109	0.381434896406221	0.478	0.266	3.27263440311311e-105	SynTI	Epc1
611	Ppargc1b	1.6962778198633e-108	0.317347844256674	0.416	0.206	3.64920247387193e-104	SynTI	Ppargc1b
612	Tnrc18	1.72913175381171e-108	0.347941991843546	0.771	0.56	3.71988114197512e-104	SynTI	Tnrc18
613	Slc39a14	3.12767670013035e-108	0.317617628952629	0.369	0.174	6.72857088499042e-104	SynTI	Slc39a14
614	Bod1l	3.91041938838856e-108	0.388279078676568	0.62	0.405	8.4124852302403e-104	SynTI	Bod1l
615	Arhgef1	4.78421106585664e-108	0.381567743697615	0.518	0.3	1.02922732659774e-103	SynTI	Arhgef1
616	Mapkapk2	5.70608986092212e-106	0.375509540226219	0.399	0.206	1.22755111178018e-101	SynTI	Mapkapk2
617	Npepl1	6.48737705378361e-106	0.347612100437127	0.266	0.11	1.39562942558047e-101	SynTI	Npepl1
618	Slc44a1	2.18309854728315e-105	0.37297155800509	0.429	0.228	4.69649990477024e-101	SynTI	Slc44a1
619	Syap1	6.50459284462086e-105	0.328146438746888	0.274	0.116	1.39933305866329e-100	SynTI	Syap1
620	Acsl3	1.39767114578576e-103	0.311658328802492	0.278	0.117	3.00680993592891e-99	SynTI	Acsl3
621	Rnf220	1.45042628091501e-103	0.393278378591612	0.318	0.149	3.12030205813246e-99	SynTI	Rnf220
622	Spint2	4.82588654577607e-102	0.306298634122295	0.361	0.173	1.0381929725928e-97	SynTI	Spint2
623	Galns	4.44467292783441e-101	0.358462110344543	0.319	0.151	9.56182486965018e-97	SynTI	Galns
624	Srsf5	5.75077456437093e-101	0.345226123596315	0.755	0.561	1.23716413203312e-96	SynTI	Srsf5
625	Cers2	8.67876117691826e-101	0.342126614855809	0.35	0.17	1.86706189199043e-96	SynTI	Cers2
626	Pik3cb	9.07906413636872e-101	0.344643915555134	0.714	0.503	1.953179067657e-96	SynTI	Pik3cb
627	Prickle1	1.87125588915702e-100	0.42603300136509	0.458	0.262	4.02563279434349e-96	SynTI	Prickle1
628	Tmc4	2.40965749100944e-100	0.345042289147386	0.372	0.187	5.18389616040862e-96	SynTI	Tmc4
629	March2	6.38862338045193e-100	0.354072586433622	0.376	0.191	1.37438454783662e-95	SynTI	March2
630	Ankrd13a	7.13360340953928e-100	0.334304907463145	0.647	0.419	1.53465210149419e-95	SynTI	Ankrd13a
631	Maea	5.23883196195755e-99	0.351956810298892	0.483	0.278	1.12702991997593e-94	SynTI	Maea
632	Dock6	5.140974595351e-98	0.369308171836088	0.538	0.329	1.10597786469786e-93	SynTI	Dock6
633	Synj1	7.13404252368828e-97	0.34162517774306	0.368	0.187	1.53474656812106e-92	SynTI	Synj1
634	Fbxl19	4.87084174497005e-96	0.336583451745827	0.573	0.356	1.04786418459541e-91	SynTI	Fbxl19
635	Wdfy2	1.05101372279431e-95	0.34174601837959	0.441	0.244	2.26104582184739e-91	SynTI	Wdfy2
636	Morc4	2.96718127002157e-95	0.325780274080784	0.324	0.155	6.38329706619741e-91	SynTI	Morc4
637	Erc1	7.93355545852859e-95	0.334149208454399	0.774	0.603	1.70674578579326e-90	SynTI	Erc1
638	St6galnac3	1.05569346555701e-94	0.292695911219565	0.363	0.183	2.2711133524528e-90	SynTI	St6galnac3
639	Rsrp1	1.30059830225618e-93	0.279019602657383	0.881	0.736	2.79797712764371e-89	SynTI	Rsrp1
640	Snx9	1.51720315853816e-93	0.297254644651634	0.872	0.714	3.26395915496315e-89	SynTI	Snx9
641	Pim1	2.4061485394413e-93	0.322672625870422	0.359	0.181	5.17634735290007e-89	SynTI	Pim1
642	Rapgef2	3.0132326443908e-93	0.259207584829551	0.958	0.866	6.48236738787793e-89	SynTI	Rapgef2
643	Mxd4	3.1311807109968e-93	0.30861941373294	0.305	0.143	6.73610906356741e-89	SynTI	Mxd4
644	Faf2	6.30113324715169e-93	0.359633784931211	0.532	0.33	1.35556279545974e-88	SynTI	Faf2
645	Kif1b	1.47398066745451e-92	0.344302064790338	0.415	0.228	3.17097460989489e-88	SynTI	Kif1b
646	Gskip	3.16393088267245e-92	0.329402962856114	0.279	0.128	6.80656450789324e-88	SynTI	Gskip
647	Megf8	6.99718313927073e-92	0.311689064688003	0.268	0.119	1.50530400875131e-87	SynTI	Megf8
648	Samd8	3.83576997196015e-91	0.297236053406202	0.273	0.122	8.25189194067786e-87	SynTI	Samd8
649	Limd1	4.64688833304369e-91	0.331656053834312	0.505	0.304	9.99685087087688e-87	SynTI	Limd1
650	Bcl9l	6.38032377605043e-91	0.256355197889017	0.288	0.129	1.37259905394173e-86	SynTI	Bcl9l
651	Ap1b1	6.86955516709595e-91	0.305857567159793	0.385	0.202	1.47784740309735e-86	SynTI	Ap1b1
652	Rnf14	1.60201134648377e-90	0.328734940920304	0.505	0.304	3.44640700969054e-86	SynTI	Rnf14
653	Stxbp3	3.05445074593878e-90	0.311695651534889	0.3	0.143	6.5710398897381e-86	SynTI	Stxbp3
654	Herc2	2.26681715810782e-89	0.346588591784135	0.672	0.479	4.87660375223735e-85	SynTI	Herc2
655	Anapc1	2.58110388253938e-89	0.344601123152339	0.533	0.333	5.55272878250697e-85	SynTI	Anapc1
656	Usp32	2.86714493791142e-89	0.338812134745194	0.616	0.411	6.16808890492883e-85	SynTI	Usp32
657	Eipr1	4.12567496666435e-89	0.459559819388143	0.423	0.248	8.87556455578503e-85	SynTI	Eipr1
658	Plekhh1	1.35312415853093e-88	0.328280094281551	0.579	0.367	2.91097600224759e-84	SynTI	Plekhh1
659	Stx2	3.29347961936738e-88	0.337005747168213	0.3	0.146	7.08526270514505e-84	SynTI	Stx2
660	Spag9	4.01581796239617e-88	0.304374871252233	0.753	0.565	8.63922918250289e-84	SynTI	Spag9
661	Tln1	7.62545058502452e-88	0.325879840145895	0.515	0.312	1.64046318435633e-83	SynTI	Tln1
662	Aebp2	1.19740883958738e-87	0.340997795257131	0.582	0.374	2.57598563660433e-83	SynTI	Aebp2
663	Scarb2	8.46576583020606e-87	0.307084271328395	0.303	0.145	1.82124020305223e-82	SynTI	Scarb2
664	Heca	9.52330197816621e-87	0.323384898978879	0.315	0.155	2.0487479545629e-82	SynTI	Heca
665	Stat2	1.12196242520379e-86	0.374280398636877	0.337	0.177	2.41367776534091e-82	SynTI	Stat2
666	Usp1	1.67096693906161e-86	0.284835778419476	0.288	0.133	3.59475117600325e-82	SynTI	Usp1
667	Snap23	2.27395593299013e-86	0.30257280410275	0.355	0.183	4.89196139864167e-82	SynTI	Snap23
668	Ube2w	3.38634371862156e-86	0.291127327294108	0.264	0.119	7.28504124187057e-82	SynTI	Ube2w
669	Cnnm2	5.06473412668748e-86	0.298594611555206	0.281	0.13	1.08957625267428e-81	SynTI	Cnnm2
670	Prdm2	1.13298536942148e-85	0.338126887109117	0.603	0.408	2.43739142523642e-81	SynTI	Prdm2
671	Wdr66	2.01240656025826e-85	0.328161738952804	0.263	0.121	4.3292902330836e-81	SynTI	Wdr66
672	Polr2a	3.18093742232706e-85	0.332621445305991	0.536	0.341	6.84315067665221e-81	SynTI	Polr2a
673	Cbx7	3.29931737104621e-85	0.322594454913189	0.876	0.777	7.09782146033172e-81	SynTI	Cbx7
674	Cdk11b	4.01283081122987e-85	0.342848463725814	0.553	0.354	8.63280292419883e-81	SynTI	Cdk11b
675	Itsn2	8.03695316166767e-85	0.32733731641756	0.611	0.417	1.72898973366957e-80	SynTI	Itsn2
676	Gdap2	6.44230115462289e-84	0.301724083726718	0.271	0.126	1.38593224739402e-79	SynTI	Gdap2
677	Rnf38	1.40880870206208e-83	0.300328801073668	0.762	0.586	3.03077016074616e-79	SynTI	Rnf38
678	Ttc7b	9.5709528064331e-83	0.272051354973482	0.664	0.445	2.05899907724795e-78	SynTI	Ttc7b
679	Tead4	1.14080120214396e-82	0.275569981056358	0.519	0.311	2.4542056261723e-78	SynTI	Tead4
680	Psmd4	1.26333948799285e-82	0.319261392407675	0.462	0.274	2.71782224051902e-78	SynTI	Psmd4
681	Gm2a	1.46955807901722e-82	0.32723888396782	0.259	0.12	3.16146029538974e-78	SynTI	Gm2a
682	A930015D03Rik	1.69258991960057e-82	0.322666909084492	0.351	0.187	3.6412686940367e-78	SynTI	A930015D03Rik
683	Senp5	2.82203967419558e-82	0.319842929574012	0.582	0.384	6.07105395109695e-78	SynTI	Senp5
684	Dsp	5.31206011979585e-82	0.304864037246562	0.678	0.468	1.14278349357168e-77	SynTI	Dsp
685	Ndel1	1.54202919494473e-81	0.322367076442424	0.419	0.242	3.3173674070846e-77	SynTI	Ndel1
686	Bptf	2.1261224216881e-81	0.302709396790756	0.702	0.514	4.5739271657776e-77	SynTI	Bptf
687	Nmnat3	3.35999171920605e-81	0.339030611931553	0.305	0.153	7.22835018552797e-77	SynTI	Nmnat3
688	Ggta1	4.58117414514619e-80	0.265450518851233	0.316	0.157	9.85547993845299e-76	SynTI	Ggta1
689	Pcyt1a	7.36433024255355e-80	0.280313528564602	0.252	0.115	1.58428836508054e-75	SynTI	Pcyt1a
690	Insr	9.34006610359586e-80	0.318558547716246	0.476	0.29	2.00932842086658e-75	SynTI	Insr
691	Cltc	2.05455613536002e-79	0.309467774409882	0.596	0.403	4.419966614e-75	SynTI	Cltc
692	Htatsf1	2.50213146536179e-79	0.303357509588748	0.392	0.218	5.38283542143282e-75	SynTI	Htatsf1
693	Dennd1b	1.19572860144958e-78	0.303134046483944	0.672	0.496	2.57237094029848e-74	SynTI	Dennd1b
694	Bahd1	1.96107620363376e-78	0.276843237607515	0.278	0.135	4.21886323687731e-74	SynTI	Bahd1
695	Itgb5	1.63440191472069e-77	0.299126709306268	0.379	0.209	3.51608883913863e-73	SynTI	Itgb5
696	Wdr20	1.69472232852558e-77	0.322828893258381	0.545	0.359	3.64585614535708e-73	SynTI	Wdr20
697	Pcsk7	3.38747222837295e-77	0.311010614116956	0.437	0.257	7.28746900489872e-73	SynTI	Pcsk7
698	Napa	6.08781554439438e-77	0.291881707129802	0.334	0.176	1.30967175806556e-72	SynTI	Napa
699	Uty	1.15305607194495e-76	0.289152710405344	0.331	0.172	2.48056952757517e-72	SynTI	Uty
700	Rab22a	1.81917675180674e-76	0.309407785263105	0.498	0.311	3.91359494616183e-72	SynTI	Rab22a
701	Snx3	1.92438071899537e-76	0.321954298706606	0.532	0.347	4.13992024077474e-72	SynTI	Snx3
702	Kat2b	2.65570098956816e-76	0.304677755480511	0.309	0.159	5.71320953885798e-72	SynTI	Kat2b
703	Arfgef2	3.89923544294755e-76	0.294707917481977	0.568	0.375	8.38842520841307e-72	SynTI	Arfgef2
704	Rbmx	1.64953263753868e-75	0.268408182727747	0.289	0.144	3.54863956313696e-71	SynTI	Rbmx
705	Fam120a	5.56947833141178e-75	0.268014107370099	0.795	0.636	1.19816187343662e-70	SynTI	Fam120a
706	Zfp568	5.87305775839744e-75	0.295577053338883	0.593	0.403	1.26347091556404e-70	SynTI	Zfp568
707	Aak1	6.8000956599245e-75	0.2987386668957	0.636	0.449	1.46290457931956e-70	SynTI	Aak1
708	Kpna6	7.41020868140643e-75	0.275285818249874	0.333	0.176	1.59415819363097e-70	SynTI	Kpna6
709	AU040320	9.84543220160934e-75	0.302830863371311	0.288	0.145	2.11804782953222e-70	SynTI	AU040320
710	Myl12b	4.2381849947962e-74	0.283841717146177	0.29	0.146	9.11760737930506e-70	SynTI	Myl12b
711	Fig4	4.28342936970982e-74	0.288132894154291	0.278	0.138	9.21494160305673e-70	SynTI	Fig4
712	Ammecr1l	1.04444070709509e-73	0.280093081359163	0.369	0.205	2.24690529317366e-69	SynTI	Ammecr1l
713	Ergic1	5.10599638689811e-73	0.281944636011532	0.314	0.163	1.09845300271339e-68	SynTI	Ergic1
714	Fam193b	1.32308663654003e-72	0.301717260446119	0.452	0.275	2.84635628118856e-68	SynTI	Fam193b
715	Zscan21	1.9946926942748e-72	0.263114248673672	0.28	0.139	4.29118239319338e-68	SynTI	Zscan21
716	Ube2e1	2.65757705597831e-72	0.329655939204455	0.471	0.296	5.71724552052613e-68	SynTI	Ube2e1
717	Sppl3	3.46946445579038e-72	0.275349051294146	0.764	0.59	7.46385888374185e-68	SynTI	Sppl3
718	Abhd12	7.70248478017779e-72	0.262206914970444	0.291	0.147	1.65703555075965e-67	SynTI	Abhd12
719	Tpst2	1.13737971839263e-71	0.29802405382499	0.475	0.293	2.44684498817806e-67	SynTI	Tpst2
720	Prrc2b	2.39625357099416e-71	0.28147065762266	0.703	0.513	5.15506030727975e-67	SynTI	Prrc2b
721	Dpf3	3.90424251597292e-71	0.296739232128575	0.773	0.62	8.39919692461255e-67	SynTI	Dpf3
722	E130307A14Rik	2.83930050689077e-69	0.28884762921111	0.313	0.168	6.10818718047411e-65	SynTI	E130307A14Rik
723	Rybp	4.06045461713489e-69	0.263543897679216	0.771	0.606	8.73525601784228e-65	SynTI	Rybp
724	Gm26745	6.10876064540079e-69	0.265004593356475	0.305	0.162	1.31417767764507e-64	SynTI	Gm26745
725	Sgsm2	6.15989144126548e-69	0.256239909821541	0.325	0.173	1.32517744575944e-64	SynTI	Sgsm2
726	Cdip1	3.80111959477606e-68	0.261070569391501	0.342	0.189	8.17734858424174e-64	SynTI	Cdip1
727	Trim25	1.7580187422119e-67	0.271740139273571	0.508	0.325	3.78202572012045e-63	SynTI	Trim25
728	Ip6k2	4.41788563527369e-67	0.257600220782683	0.281	0.144	9.50419736716428e-63	SynTI	Ip6k2
729	Sbno2	6.20944788334608e-67	0.257635441562269	0.358	0.201	1.33583852314424e-62	SynTI	Sbno2
730	Rabep1	7.87258899025704e-67	0.273591240822825	0.726	0.562	1.693630069474e-62	SynTI	Rabep1
731	Papss1	9.08569519883947e-67	0.267550257439357	0.362	0.205	1.95460560812633e-62	SynTI	Papss1
732	Gm20732	9.21425971583144e-67	0.286201295949905	0.378	0.221	1.98226369266682e-62	SynTI	Gm20732
733	Araf	9.69447677633898e-67	0.29192869168368	0.406	0.244	2.08557278889381e-62	SynTI	Araf
734	Swt1	9.8140824747402e-67	0.278486384652946	0.502	0.325	2.11130356279086e-62	SynTI	Swt1
735	Dbnl	2.51464650410712e-66	0.289143059759332	0.302	0.162	5.40975902428565e-62	SynTI	Dbnl
736	Rnf20	3.59291813371051e-66	0.271503021395376	0.309	0.167	7.72944478105141e-62	SynTI	Rnf20
737	Map3k7	5.1044313629227e-66	0.282762008834227	0.399	0.239	1.09811631910556e-61	SynTI	Map3k7
738	Hsd17b4	2.09761629139079e-65	0.25128007482089	0.374	0.212	4.512601927669e-61	SynTI	Hsd17b4
739	Rnf145	3.58868251093727e-65	0.269088336928664	0.395	0.235	7.72033268577935e-61	SynTI	Rnf145
740	Jade3	1.09494254904342e-64	0.259372862508806	0.779	0.63	2.35554990575711e-60	SynTI	Jade3
741	Mbd6	1.47331468861413e-64	0.273727743764244	0.461	0.287	3.16954188961559e-60	SynTI	Mbd6
742	Cdk9	1.76390643299338e-64	0.299865199354395	0.294	0.159	3.79469190929867e-60	SynTI	Cdk9
743	Supt5	2.28403549650827e-64	0.277857361856446	0.59	0.406	4.91364556363823e-60	SynTI	Supt5
744	Zfp950	2.67098388042886e-64	0.298090481921613	0.427	0.265	5.7460876219666e-60	SynTI	Zfp950
745	Stk24	4.10473713769382e-64	0.2822748100475	0.643	0.462	8.83052100432072e-60	SynTI	Stk24
746	Fxr2	6.2854691467771e-63	0.27185946857575	0.419	0.257	1.35219297754616e-58	SynTI	Fxr2
747	Rac1	3.99757477581129e-62	0.2705275975442	0.476	0.305	8.59998261520283e-58	SynTI	Rac1
748	Arf4	5.4886072867575e-62	0.354231027089346	0.465	0.311	1.18076408560014e-57	SynTI	Arf4
749	Mlxip	1.0243497279369e-61	0.252372077509616	0.42	0.257	2.20368356971065e-57	SynTI	Mlxip
750	Brf1	2.60402620579407e-61	0.270640250557353	0.394	0.239	5.60204157652478e-57	SynTI	Brf1
751	Ppm1b	3.67302248065166e-61	0.326574458878884	0.516	0.353	7.90177326262593e-57	SynTI	Ppm1b
752	Arfgap1	7.02994764244517e-61	0.268781122195278	0.412	0.254	1.51235263631923e-56	SynTI	Arfgap1
753	Zmiz1	3.32716676578083e-60	0.256350531859302	0.55	0.377	7.1577338632243e-56	SynTI	Zmiz1
754	Gm28153	1.01042846264514e-59	0.308852238237589	0.418	0.266	2.1737347516885e-55	SynTI	Gm28153
755	Npepps	2.44030667362945e-59	0.261016079288072	0.642	0.468	5.24983174697903e-55	SynTI	Npepps
756	Ubqln1	3.18019730086195e-58	0.253764393625264	0.499	0.331	6.84155845334432e-54	SynTI	Ubqln1
757	Terf2	1.27463956543355e-57	0.260570939465511	0.439	0.281	2.7421320971172e-53	SynTI	Terf2
758	Hps5	2.34938849656019e-57	0.253000777847773	0.368	0.222	5.05423947264994e-53	SynTI	Hps5
759	Ugp2	7.51953337614089e-57	0.252659425816493	0.493	0.325	1.61767721520919e-52	SynTI	Ugp2
760	Txlna	1.37220283018678e-56	0.255711325815614	0.356	0.212	2.95201994858081e-52	SynTI	Txlna
761	Ccnl2	6.3263864811267e-56	0.250427837129729	0.694	0.52	1.36099552368479e-51	SynTI	Ccnl2
762	Rtf1	2.14970621127155e-55	0.250087764213796	0.496	0.333	4.62466297230849e-51	SynTI	Rtf1
763	Pstpip1	1.07540122933458e-54	0.269954661823887	0.391	0.246	2.31351066466748e-50	SynTI	Pstpip1
764	Clk4	1.38177289506924e-54	0.253128301346674	0.494	0.333	2.97260802916245e-50	SynTI	Clk4
765	Phactr4	1.82041766754517e-54	0.260301985935287	0.445	0.289	3.91626452818991e-50	SynTI	Phactr4
766	Iars2	6.95415097694041e-52	0.280803767460595	0.328	0.197	1.49604649966919e-47	SynTI	Iars2
767	Igfbp7	0	2.08283346593318	0.755	0.108	0	GC	Igfbp7
768	Rora	0	1.95480653143241	0.905	0.441	0	GC	Rora
769	Col4a1	0	1.85126548461168	0.963	0.361	0	GC	Col4a1
770	Tcf4	0	1.79335628781097	0.991	0.69	0	GC	Tcf4
771	Ptprm	0	1.74736483814068	0.967	0.55	0	GC	Ptprm
772	Tiam2	0	1.70247732049165	0.932	0.307	0	GC	Tiam2
773	Plac8	0	1.6897510795438	0.908	0.292	0	GC	Plac8
774	Ncam1	0	1.68141044601886	0.983	0.556	0	GC	Ncam1
775	Nuak1	0	1.67730021455315	0.725	0.123	0	GC	Nuak1
776	Sh3kbp1	0	1.65145557484525	0.904	0.298	0	GC	Sh3kbp1
777	Nmnat2	0	1.63290137735874	0.615	0.066	0	GC	Nmnat2
778	Col4a2	0	1.62390706545188	0.924	0.296	0	GC	Col4a2
779	Gna14	0	1.58442475801902	0.915	0.275	0	GC	Gna14
780	Tnfrsf9	0	1.5480453492786	0.948	0.406	0	GC	Tnfrsf9
781	Pla2g4d	0	1.54332446175032	0.649	0.081	0	GC	Pla2g4d
782	Aldh1a3	0	1.53495967401935	0.596	0.084	0	GC	Aldh1a3
783	Pcsk6	0	1.52487317988389	0.443	0.085	0	GC	Pcsk6
784	Vav3	0	1.52320301877689	0.776	0.22	0	GC	Vav3
785	Cmip	0	1.49474378821478	0.973	0.645	0	GC	Cmip
786	Ypel2	0	1.48424933969849	0.663	0.139	0	GC	Ypel2
787	Frmd4a	0	1.42827172225997	0.973	0.59	0	GC	Frmd4a
788	Olr1	0	1.3743306521059	0.601	0.165	0	GC	Olr1
789	Sema6a	0	1.36767443339826	0.82	0.392	0	GC	Sema6a
790	Svep1	0	1.33348297964111	0.583	0.125	0	GC	Svep1
791	Pla2g4f	0	1.31883108082496	0.631	0.114	0	GC	Pla2g4f
792	Ano6	0	1.29052527325267	0.973	0.615	0	GC	Ano6
793	Gsg1l	0	1.28678127474438	0.356	0.032	0	GC	Gsg1l
794	Anxa11	0	1.27611334420718	0.944	0.496	0	GC	Anxa11
795	Arntl	0	1.26659344695716	0.753	0.214	0	GC	Arntl
796	Cyfip2	0	1.2643672908193	0.56	0.087	0	GC	Cyfip2
797	Rgs12	0	1.24605866431429	0.685	0.188	0	GC	Rgs12
798	Arhgap6	0	1.24024277835245	0.876	0.417	0	GC	Arhgap6
799	Elmo1	0	1.21215162110887	0.88	0.471	0	GC	Elmo1
800	Wipf1	0	1.21039104161206	0.89	0.39	0	GC	Wipf1
801	Nlrc5	0	1.20731743247443	0.475	0.053	0	GC	Nlrc5
802	Tiam1	0	1.17685392992637	0.952	0.523	0	GC	Tiam1
803	Lhfp	0	1.16936378754381	0.898	0.461	0	GC	Lhfp
804	Car2	0	1.12891178337781	0.802	0.352	0	GC	Car2
805	Slco3a1	0	1.1223618390913	0.745	0.235	0	GC	Slco3a1
806	Zmat4	0	1.11397154598575	0.406	0.107	0	GC	Zmat4
807	Mboat2	0	1.09914065442568	0.464	0.131	0	GC	Mboat2
808	Anxa4	0	1.06685159398676	0.959	0.646	0	GC	Anxa4
809	Zdhhc14	0	1.06547136967915	0.868	0.436	0	GC	Zdhhc14
810	Ada	0	1.06416806222015	0.559	0.143	0	GC	Ada
811	Nav1	0	1.05515585850049	0.886	0.508	0	GC	Nav1
812	P3h2	0	1.0476984102532	0.737	0.259	0	GC	P3h2
813	Tbc1d1	0	1.04539659811696	0.511	0.158	0	GC	Tbc1d1
814	Prune2	0	1.04478649034944	0.982	0.568	0	GC	Prune2
815	Lamc1	0	1.04370399872345	0.858	0.471	0	GC	Lamc1
816	Sh3pxd2a	0	1.0427854875147	0.972	0.676	0	GC	Sh3pxd2a
817	Rasa3	0	1.04178952796788	0.461	0.104	0	GC	Rasa3
818	Lamb1	0	1.03924767111294	0.566	0.164	0	GC	Lamb1
819	Ppp2r2c	0	1.03092486732968	0.851	0.324	0	GC	Ppp2r2c
820	Hsd17b7	0	1.02922628392374	0.507	0.112	0	GC	Hsd17b7
821	Gcnt2	0	1.01686799178727	0.555	0.176	0	GC	Gcnt2
822	Pappa2	0	1.01650797471726	0.986	0.731	0	GC	Pappa2
823	Fam126a	0	0.989938353446169	0.675	0.253	0	GC	Fam126a
824	Nid1	0	0.983017989422242	0.718	0.339	0	GC	Nid1
825	Dpysl3	0	0.977838043956444	0.398	0.064	0	GC	Dpysl3
826	Chd9	0	0.975252225836178	0.504	0.146	0	GC	Chd9
827	Piezo2	0	0.967960550496902	0.673	0.225	0	GC	Piezo2
828	Actn1	0	0.960684051505722	0.865	0.465	0	GC	Actn1
829	Fam13b	0	0.960218954082345	0.879	0.592	0	GC	Fam13b
830	Tmem132e	0	0.957974377048452	0.584	0.162	0	GC	Tmem132e
831	Mast4	0	0.953350158998658	0.915	0.575	0	GC	Mast4
832	Hivep1	0	0.942935428651766	0.671	0.27	0	GC	Hivep1
833	Pla2g4e	0	0.936329742377419	0.434	0.094	0	GC	Pla2g4e
834	Pdcd4	0	0.935072978350294	0.666	0.287	0	GC	Pdcd4
835	Gpat3	0	0.922900134550932	0.497	0.163	0	GC	Gpat3
836	Proser2	0	0.911199927952842	0.482	0.163	0	GC	Proser2
837	Coro2a	0	0.911095164785527	0.579	0.178	0	GC	Coro2a
838	Rab31	0	0.903032126843733	0.469	0.151	0	GC	Rab31
839	Arhgap22	0	0.895331525654335	0.724	0.32	0	GC	Arhgap22
840	Anks1	0	0.887118732479772	0.787	0.452	0	GC	Anks1
841	Nedd4l	0	0.879656589807198	0.886	0.528	0	GC	Nedd4l
842	Sct	0	0.875879712545117	0.707	0.345	0	GC	Sct
843	Plekhg3	0	0.875346967516422	0.453	0.12	0	GC	Plekhg3
844	Meis2	0	0.874043332517989	0.724	0.34	0	GC	Meis2
845	Sulf2	0	0.865865757052414	0.469	0.141	0	GC	Sulf2
846	Rcan1	0	0.862135302655351	0.592	0.241	0	GC	Rcan1
847	Rab8b	0	0.853729154444352	0.758	0.332	0	GC	Rab8b
848	Mill2	0	0.850521117137314	0.383	0.082	0	GC	Mill2
849	Sema6d	0	0.847376529460146	0.492	0.145	0	GC	Sema6d
850	Plekhg1	0	0.846305136607542	0.863	0.438	0	GC	Plekhg1
851	Pitrm1	0	0.837320682429614	0.735	0.336	0	GC	Pitrm1
852	Rps6ka2	0	0.836123022515007	0.655	0.263	0	GC	Rps6ka2
853	Lrrfip1	0	0.831860035802765	0.649	0.27	0	GC	Lrrfip1
854	Creb3l2	0	0.829131629723403	0.845	0.432	0	GC	Creb3l2
855	Nckap5l	0	0.824922034020998	0.476	0.132	0	GC	Nckap5l
856	Bcas3	0	0.813343549241893	0.869	0.596	0	GC	Bcas3
857	Fam171a1	0	0.808432077770671	0.73	0.336	0	GC	Fam171a1
858	Nol4	0	0.808036051133056	0.251	0.033	0	GC	Nol4
859	Lama5	0	0.806960759951078	0.758	0.366	0	GC	Lama5
860	Parva	0	0.806704899349502	0.971	0.759	0	GC	Parva
861	Myo1e	0	0.806512691560353	0.913	0.638	0	GC	Myo1e
862	Dtx1	0	0.800040306621228	0.43	0.126	0	GC	Dtx1
863	Zc3h7b	0	0.799806953530655	0.29	0.048	0	GC	Zc3h7b
864	Anxa2	0	0.795715235406168	0.774	0.433	0	GC	Anxa2
865	Nostrin	0	0.792388459147188	0.639	0.269	0	GC	Nostrin
866	Trp53i11	0	0.791476373831571	0.36	0.087	0	GC	Trp53i11
867	Rap1gap	0	0.788980806195444	0.454	0.141	0	GC	Rap1gap
868	Gpr1	0	0.787235616798487	0.412	0.104	0	GC	Gpr1
869	Zfp532	0	0.781887994840172	0.685	0.326	0	GC	Zfp532
870	Nek6	0	0.774258549023056	0.65	0.282	0	GC	Nek6
871	Plekha5	0	0.768644228929494	0.949	0.792	0	GC	Plekha5
872	Ttll11	0	0.754152465369255	0.284	0.049	0	GC	Ttll11
873	1500009L16Rik	0	0.74914742829596	0.549	0.193	0	GC	1500009L16Rik
874	Fryl	0	0.747914936514194	0.892	0.609	0	GC	Fryl
875	Gfod1	0	0.742934490976263	0.794	0.403	0	GC	Gfod1
876	Hdac4	0	0.742068701815771	0.922	0.586	0	GC	Hdac4
877	Fam78b	0	0.739363105819229	0.861	0.545	0	GC	Fam78b
878	Dock1	0	0.726444121847036	0.946	0.704	0	GC	Dock1
879	Pde4dip	0	0.6786463601454	0.877	0.551	0	GC	Pde4dip
880	Afap1l2	0	0.675862585378485	0.961	0.752	0	GC	Afap1l2
881	Hspg2	0	0.66354004503433	0.91	0.659	0	GC	Hspg2
882	Myof1	0	0.66086598495813	0.874	0.528	0	GC	Myof
883	Etv6	0	0.647817398780313	0.92	0.666	0	GC	Etv6
884	Cald1	0	0.639091283099328	0.96	0.76	0	GC	Cald1
885	Mical3	0	0.632879759169976	0.96	0.758	0	GC	Mical3
886	Flt1	0	0.590396043880112	0.905	0.576	0	GC	Flt1
887	Pcdh12	8.49861703265217e-308	0.672716819287385	0.343	0.08	1.82830748223446e-303	GC	Pcdh12
888	Fgfr1	2.1751630173062e-303	0.754823277644328	0.737	0.38	4.67942819913084e-299	GC	Fgfr1
889	Col3a1	2.24669297688947e-303	0.820573038732317	0.279	0.053	4.83331060118232e-299	GC	Col3a1
890	Rgs17	6.02660825371234e-302	0.926548021462766	0.612	0.277	1.29650423362114e-297	GC	Rgs17
891	Dst	1.98166926329102e-297	0.468631028195782	0.997	0.898	4.26316508611798e-293	GC	Dst
892	Mgat5	3.14040874290517e-297	0.609278226215614	0.912	0.688	6.75596132861189e-293	GC	Mgat5
893	Chst11	2.29572200955293e-296	0.588100565183294	0.791	0.365	4.93878675915122e-292	GC	Chst11
894	Rai14	1.03086382101769e-295	0.783066151113983	0.744	0.413	2.21769733815536e-291	GC	Rai14
895	Plpp3	3.14235489869734e-294	0.980884764656463	0.759	0.47	6.76014809356758e-290	GC	Plpp3
896	Macf11	2.05113648026873e-292	0.455577654194752	0.995	0.912	4.41260991000212e-288	GC	Macf1
897	Mmp15	5.05743529651826e-291	0.862541074887567	0.492	0.182	1.08800605533997e-286	GC	Mmp15
898	Kalrn	1.50395314566525e-290	0.811197585229558	0.625	0.283	3.23545440226965e-286	GC	Kalrn
899	Sept9	1.0846011016312e-289	0.577302066089278	0.954	0.766	2.33330234993921e-285	GC	Sept9
900	Msi2	5.54936905866561e-287	0.664941809854201	0.905	0.648	1.19383576559073e-282	GC	Msi2
901	Sipa1l3	1.68659731114924e-285	1.13195484577715	0.698	0.409	3.62837679547535e-281	GC	Sipa1l3
902	Lcp1	7.65057528234829e-283	0.843442277625325	0.419	0.134	1.64586826049159e-278	GC	Lcp1
903	Ctif	1.21509096791153e-279	0.776698201978948	0.57	0.237	2.61402519926807e-275	GC	Ctif
904	Fam69a	3.04452120348196e-277	0.879879334433133	0.343	0.092	6.54967846505074e-273	GC	Fam69a
905	Frmd4b	6.07216492431682e-277	0.491495376410761	0.798	0.436	1.30630484016828e-272	GC	Frmd4b
906	Hpcal1	2.9996452584425e-276	0.803439865289523	0.7	0.363	6.45313684448735e-272	GC	Hpcal1
907	Adtrp	1.47549890904688e-275	0.713991648766079	0.296	0.067	3.17424080303255e-271	GC	Adtrp
908	Dapk1	5.93556937166088e-275	0.633553431768327	0.889	0.606	1.27691903892541e-270	GC	Dapk1
909	Lasp1	2.80779832874224e-274	0.726953380739231	0.742	0.44	6.04041654462319e-270	GC	Lasp1
910	Vstm5	2.89493105500048e-272	0.697048676643408	0.346	0.091	6.22786517862253e-268	GC	Vstm5
911	Phactr1	5.63680944354885e-272	1.19314329198086	0.505	0.211	1.21264681559066e-267	GC	Phactr1
912	Ets2	1.27059247837644e-269	0.747136017889631	0.533	0.222	2.73342559873123e-265	GC	Ets2
913	Rgs5	2.57960603196671e-265	0.859160418886932	0.319	0.082	5.54950645656997e-261	GC	Rgs5
914	Atp2b4	5.51355182853885e-265	0.763749487993892	0.318	0.079	1.18613040487356e-260	GC	Atp2b4
915	Tmcc31	6.83816709365312e-263	0.82516299240062	0.796	0.521	1.4710948868576e-258	GC	Tmcc3
916	Fndc3b	2.92343403743882e-262	0.340562018630575	0.998	0.94	6.28918364474212e-258	GC	Fndc3b
917	Mcu	1.41474116821531e-261	0.697449751708782	0.858	0.624	3.04353267518159e-257	GC	Mcu
918	Tsc22d1	6.04353122107067e-261	0.733573061435125	0.755	0.463	1.30014487158893e-256	GC	Tsc22d1
919	Amotl1	4.15191204566309e-260	0.713590405102256	0.496	0.192	8.93200838383501e-256	GC	Amotl1
920	Adgrl3	7.17119609450888e-254	0.764945965053399	0.353	0.102	1.5427394158117e-249	GC	Adgrl3
921	Lgals9	9.03113764893202e-253	0.65976652867092	0.791	0.509	1.94286864241475e-248	GC	Lgals9
922	Asap31	8.45859136683996e-252	0.786948258898047	0.619	0.306	1.81969676074828e-247	GC	Asap3
923	Ptprf	7.59198859555529e-248	0.684132537695664	0.618	0.294	1.63326450656181e-243	GC	Ptprf
924	Micall1	5.1604172332867e-247	0.708677222332415	0.52	0.216	1.11016055939697e-242	GC	Micall1
925	Soga1	2.46720667592208e-246	0.713271494103863	0.59	0.273	5.30770172191116e-242	GC	Soga1
926	Kdm6b	8.5833499437063e-245	0.685686764135055	0.519	0.215	1.84653607338954e-240	GC	Kdm6b
927	Serpinb9e	1.11367051049136e-240	0.825250656891068	0.561	0.272	2.39583936922005e-236	GC	Serpinb9e
928	Phf20	1.33685654554384e-240	0.571438120767035	0.862	0.653	2.87597948642846e-236	GC	Phf20
929	Fam168a	3.96015997135339e-239	0.52015062049549	0.914	0.69	8.51949214637254e-235	GC	Fam168a
930	Fblim1	2.31003685580225e-238	0.703077408878873	0.632	0.322	4.96958228788739e-234	GC	Fblim1
931	Basp1	5.07953879570565e-238	0.532758536719601	0.944	0.816	1.09276118112016e-233	GC	Basp1
932	H2-K1	1.28868645423074e-236	0.832984044579682	0.381	0.127	2.77235116898658e-232	GC	H2-K1
933	Kif5c	2.73404913882299e-236	0.799569607102503	0.44	0.168	5.8817599123499e-232	GC	Kif5c
934	Ctnnbip1	7.50738909357743e-236	0.670325306387	0.658	0.348	1.61506461570131e-231	GC	Ctnnbip1
935	Gbe1	1.86113954002316e-232	0.760746424882181	0.606	0.31	4.00386949245182e-228	GC	Gbe1
936	Syde1	5.03245462696726e-229	0.617187238443098	0.407	0.138	1.08263196389947e-224	GC	Syde1
937	Mtss1	6.22468677269253e-229	0.5707669590625	0.962	0.821	1.33911686540934e-224	GC	Mtss1
938	Tpm1	1.0332454740791e-228	0.618975463290268	0.8	0.535	2.22282098838636e-224	GC	Tpm1
939	Man1a	1.49907461547708e-228	0.59745846944451	0.776	0.466	3.22495922027584e-224	GC	Man1a
940	Trio	6.73058631974062e-228	0.484147380868389	0.945	0.742	1.4479510349658e-223	GC	Trio
941	Vstm4	1.5026669328453e-226	0.652347532210643	0.484	0.196	3.23268737263009e-222	GC	Vstm4
942	Cdc42se2	1.29714381773751e-225	0.598339937797749	0.812	0.555	2.79054549509871e-221	GC	Cdc42se2
943	Dyrk2	3.59207350685404e-225	0.639790515678308	0.437	0.163	7.7276277352951e-221	GC	Dyrk2
944	Spsb1	4.81709732619239e-224	0.841029690179638	0.361	0.115	1.03630214778377e-219	GC	Spsb1
945	Cerk	5.48825009787469e-224	0.592882138488428	0.299	0.079	1.18068724355578e-219	GC	Cerk
946	Cblb	1.79485011374285e-223	0.747860277806023	0.587	0.3	3.86126104969499e-219	GC	Cblb
947	Fhit	1.66577547478638e-222	0.728971659968529	0.772	0.511	3.58358277890793e-218	GC	Fhit
948	Lrrc8d	9.20180148790322e-222	0.661814029708925	0.785	0.53	1.97958355409262e-217	GC	Lrrc8d
949	Itga1	1.11891104430024e-221	0.662218880776507	0.381	0.13	2.4071133296031e-217	GC	Itga1
950	Tet3	2.78951168378203e-220	0.67437124193431	0.698	0.408	6.00107648532028e-216	GC	Tet3
951	Nkain1	1.35639825637854e-218	0.708860962769379	0.573	0.278	2.91801956894716e-214	GC	Nkain1
952	Srpk2	8.91804177753719e-217	0.831032695570973	0.729	0.491	1.91853832760158e-212	GC	Srpk2
953	Igsf3	1.60363311969453e-216	0.620780898033325	0.361	0.116	3.44989593039884e-212	GC	Igsf3
954	Ddb1	9.34976615453705e-214	0.579820245203553	0.791	0.546	2.01141519282556e-209	GC	Ddb1
955	Ncmap	5.30409927567658e-213	0.615756765276147	0.491	0.201	1.1410708771763e-208	GC	Ncmap
956	Cdyl2	1.46678674566258e-212	0.659259276576283	0.488	0.206	3.15549832594391e-208	GC	Cdyl2
957	Pard6g	6.44567734251449e-212	0.656390356757122	0.764	0.505	1.38665856669514e-207	GC	Pard6g
958	Ide	4.69416142412022e-210	0.652141949329455	0.44	0.175	1.00985494717098e-205	GC	Ide
959	Psg29	5.98687946497049e-210	0.805797964654937	0.409	0.156	1.2879573792991e-205	GC	Psg29
960	Prex2	8.34508665403103e-208	0.688951724840928	0.63	0.339	1.7952784918817e-203	GC	Prex2
961	Itga3	2.39611625861589e-205	0.636280723532979	0.384	0.137	5.15476490716036e-201	GC	Itga3
962	Ust	1.25331946513772e-204	0.728851801704826	0.28	0.077	2.69626616535077e-200	GC	Ust
963	Entpd1	1.10202293358435e-202	0.643553895526924	0.542	0.249	2.37078193702001e-198	GC	Entpd1
964	Afap1l11	2.16235892657444e-198	0.694604275669428	0.347	0.12	4.6518827587396e-194	GC	Afap1l1
965	Adam191	1.16572347060198e-196	0.789163208034027	0.621	0.343	2.50782090230603e-192	GC	Adam19
966	Cdhr5	6.73336842789007e-195	0.652737639711499	0.413	0.16	1.44854954989199e-190	GC	Cdhr5
967	Rcor1	7.50904046492314e-192	0.5212851622152	0.853	0.624	1.61541987521892e-187	GC	Rcor1
968	S100a6	2.31370558241038e-187	0.652396283859762	0.477	0.217	4.97747481943946e-183	GC	S100a6
969	Btbd11	2.32022383812594e-187	0.754606200328273	0.401	0.156	4.99149754296033e-183	GC	Btbd11
970	Stk39	3.44394895427948e-187	0.565866530734648	0.696	0.41	7.40896738534144e-183	GC	Stk39
971	Pkib	8.68130992459256e-187	0.541905736577109	0.256	0.068	1.8676102040776e-182	GC	Pkib
972	Faxc	2.95674108310635e-181	0.562676488645258	0.306	0.097	6.36083709208668e-177	GC	Faxc
973	Ralbp1	8.24238611326682e-180	0.50108220704544	0.828	0.593	1.77318452454709e-175	GC	Ralbp1
974	Sema4c	1.46937445159973e-176	0.566172474280014	0.363	0.134	3.1610652577265e-172	GC	Sema4c
975	Ppard	1.31735164476752e-175	0.652033807972568	0.611	0.349	2.83401859338837e-171	GC	Ppard
976	Tgfbr2	1.96974725275048e-175	0.618239228434123	0.338	0.121	4.23751726484211e-171	GC	Tgfbr2
977	Rffl	6.40978373253097e-175	0.459436397719433	0.869	0.642	1.37893677437939e-170	GC	Rffl
978	Ddhd1	3.10671477316375e-172	0.5824691874686	0.437	0.19	6.68347549150717e-168	GC	Ddhd1
979	Dab2ip	2.79529163420551e-171	0.58191110430922	0.387	0.154	6.01351089266631e-167	GC	Dab2ip
980	Susd1	1.84770366821706e-170	0.643924608800263	0.477	0.227	3.97496490143537e-166	GC	Susd1
981	Tbc1d8	2.08919941053782e-170	0.654133318882851	0.459	0.209	4.49449469189002e-166	GC	Tbc1d8
982	Pfkp	4.12747153023545e-170	0.607236061304777	0.598	0.33	8.87942950299552e-166	GC	Pfkp
983	Rap1a	1.10199063007022e-169	0.522294190110854	0.751	0.52	2.37071244247006e-165	GC	Rap1a
984	Sgpp2	6.61580761395631e-168	0.550047665419225	0.59	0.311	1.42325869199042e-163	GC	Sgpp2
985	Sema3e	1.26551417838437e-165	0.524308607609846	0.742	0.475	2.72250065195829e-161	GC	Sema3e
986	Gnb4	2.10498153867865e-165	0.570945505319685	0.58	0.308	4.52844678415939e-161	GC	Gnb4
987	Map2k1	6.95781447903407e-164	0.512052899750755	0.813	0.627	1.4968346288746e-159	GC	Map2k1
988	Ptbp3	4.80408397538822e-162	0.438258953726566	0.896	0.756	1.03350258562527e-157	GC	Ptbp3
989	Xylt1	2.30365946188278e-161	0.291772221012442	0.81	0.484	4.95586260034843e-157	GC	Xylt1
990	Arid5b	8.38826684831974e-161	0.379423385096648	0.962	0.843	1.80456784707902e-156	GC	Arid5b
991	Serpinb9g	1.27132427306657e-160	0.522340725513306	0.283	0.093	2.73499990864812e-156	GC	Serpinb9g
992	Sec14l1	1.50256981019721e-158	0.572418818892629	0.594	0.339	3.23247843267725e-154	GC	Sec14l1
993	Snx24	2.1567553051249e-157	0.552148503889316	0.671	0.422	4.6398276879152e-153	GC	Snx24
994	Braf	2.38113024717554e-157	0.446486273541834	0.88	0.744	5.12252550074875e-153	GC	Braf
995	Pros1	5.15560804376168e-157	0.571257197874265	0.494	0.247	1.10912595845445e-152	GC	Pros1
996	Sema3f	5.30716821670126e-157	0.538174980915063	0.534	0.276	1.14173109845894e-152	GC	Sema3f
997	Mpzl1	3.98904587873334e-156	0.471918619584407	0.811	0.586	8.58163439891904e-152	GC	Mpzl1
998	Pygl	1.16871307819835e-151	0.525342934995753	0.279	0.094	2.51425244512812e-147	GC	Pygl
999	Arsb	3.21955108743307e-151	0.554250534451239	0.346	0.137	6.92622025439477e-147	GC	Arsb
1000	Prl2c5	4.50327977568046e-151	0.697480156468467	0.372	0.159	9.68790578142138e-147	GC	Prl2c5
1001	Flna	5.25960192238399e-151	0.520429615372684	0.303	0.107	1.13149816156247e-146	GC	Flna
1002	Tpbpa	6.21780208353052e-150	0.460673853574382	0.708	0.439	1.33763576222992e-145	GC	Tpbpa
1003	Mmp28	2.05528354033748e-149	0.542100878936274	0.336	0.131	4.42153148032802e-145	GC	Mmp28
1004	Elk3	9.14735009192114e-148	0.54904846224155	0.393	0.173	1.967869425275e-143	GC	Elk3
1005	Pde4d	1.42364570206751e-147	0.434999620661267	0.852	0.647	3.06268899885783e-143	GC	Pde4d
1006	Galnt10	6.08544442975888e-146	0.579661167389504	0.377	0.162	1.30916166017403e-141	GC	Galnt10
1007	Serinc5	3.43999073877762e-144	0.55451823044135	0.431	0.205	7.40045207633229e-140	GC	Serinc5
1008	Cdk17	4.87576448075521e-144	0.53159872332301	0.648	0.41	1.04892321274487e-139	GC	Cdk17
1009	Bdkrb2	1.53542528968319e-143	0.639717382901233	0.31	0.117	3.30316042569545e-139	GC	Bdkrb2
1010	Lrrk1	5.24034397840241e-142	0.533097692484808	0.33	0.128	1.12735520007371e-137	GC	Lrrk1
1011	Mical2	9.32362662854935e-142	0.492562332810713	0.582	0.329	2.00579179659982e-137	GC	Mical2
1012	Nsd3	5.18894999603474e-141	0.282725721431596	0.935	0.794	1.11629881264695e-136	GC	Nsd3
1013	Ccser1	5.62593995469125e-136	0.327048234822335	0.885	0.664	1.21030846245273e-131	GC	Ccser1
1014	Serpinb9f	4.83469036498057e-135	0.546836700063603	0.263	0.093	1.04008693821827e-130	GC	Serpinb9f
1015	Tbc1d22a	9.19390810692476e-134	0.514522388714716	0.617	0.396	1.97788545104272e-129	GC	Tbc1d22a
1016	Palm	1.00499634776396e-133	0.511715031453498	0.59	0.352	2.1620486429446e-129	GC	Palm
1017	Iffo1	6.93705156969883e-133	0.453157718481834	0.326	0.129	1.49236790418931e-128	GC	Iffo1
1018	Fam76a	3.46020654527591e-131	0.520275271728929	0.482	0.257	7.44394234085206e-127	GC	Fam76a
1019	Gnaq	1.60846766770999e-130	0.336362397592514	0.952	0.873	3.4602964935445e-126	GC	Gnaq
1020	Nfib	3.76522184694127e-129	0.585297802390665	0.385	0.178	8.10012175932474e-125	GC	Nfib
1021	Srgap2	6.80700062875974e-129	0.403827426876516	0.818	0.606	1.46439004526508e-124	GC	Srgap2
1022	Ttll3	1.26851481602715e-128	0.478122968334822	0.324	0.133	2.72895592371921e-124	GC	Ttll3
1023	Pbx1	3.20370664716841e-128	0.617240817071901	0.438	0.225	6.8921341100534e-124	GC	Pbx1
1024	Cyld	2.13518064114216e-127	0.478180307122463	0.335	0.142	4.59341411328914e-123	GC	Cyld
1025	Rgl11	3.04796043653579e-127	0.550020591133807	0.584	0.363	6.55707728711945e-123	GC	Rgl1
1026	Bmp2k	7.2932291685203e-127	0.527450989301256	0.438	0.225	1.56899239102377e-122	GC	Bmp2k
1027	Gramd1b	8.98147953402394e-127	0.480977275585588	0.553	0.319	1.93218569215457e-122	GC	Gramd1b
1028	Adgrg6	8.02781039893356e-126	0.411522811842978	0.751	0.504	1.72702285112258e-121	GC	Adgrg6
1029	Arhgap23	7.01609492470579e-125	0.420009922915755	0.807	0.643	1.50937250115196e-120	GC	Arhgap23
1030	Tpm4	1.05794567393637e-123	0.501809378529119	0.615	0.405	2.27595852833931e-119	GC	Tpm4
1031	Tnfaip8	3.32728139772895e-123	0.284766779872805	0.657	0.389	7.15798047093429e-119	GC	Tnfaip8
1032	Epb41l2	1.5798126808691e-122	0.477118294407177	0.657	0.429	3.3986510203537e-118	GC	Epb41l2
1033	Cdh5	2.0748849100242e-121	0.508444864869749	0.536	0.31	4.46369990693506e-117	GC	Cdh5
1034	Lgals3	4.76106019968188e-121	0.492375694982426	0.523	0.303	1.02424688075756e-116	GC	Lgals3
1035	Ptger3	9.53631166195431e-121	0.509975409441224	0.365	0.166	2.05154672783623e-116	GC	Ptger3
1036	Fubp3	1.97816091570655e-120	0.48607963982251	0.549	0.329	4.25561757795951e-116	GC	Fubp3
1037	Rassf3	4.29825355867039e-120	0.456535612154465	0.737	0.538	9.24683288076761e-116	GC	Rassf3
1038	Arpc1b	6.03155992980382e-120	0.454798583474891	0.602	0.381	1.2975694876987e-115	GC	Arpc1b
1039	Park2	3.80619194399106e-118	0.494695318561945	0.579	0.352	8.18826072910797e-114	GC	Park2
1040	Irf2	7.80540693693804e-118	0.493432734248152	0.584	0.368	1.67917719434348e-113	GC	Irf2
1041	Ralb	9.93187038828335e-118	0.520515987988852	0.443	0.234	2.1366432766314e-113	GC	Ralb
1042	Map4k4	3.60966966765676e-117	0.342669197684233	0.906	0.765	7.76548235603e-113	GC	Map4k4
1043	Fam49b	5.88456988996248e-117	0.453547623264512	0.815	0.66	1.26594752042763e-112	GC	Fam49b
1044	Bach2	2.96723945413292e-116	0.483592743119064	0.41	0.204	6.38342223767615e-112	GC	Bach2
1045	Nin	7.61333002164889e-116	0.455587343962821	0.476	0.259	1.63785568755733e-111	GC	Nin
1046	Cfap43	8.44194038300716e-116	0.451674003016088	0.306	0.126	1.81611463459633e-111	GC	Cfap43
1047	Tfap2c	4.49006282422055e-115	0.454726726298589	0.6	0.384	9.65947215374567e-111	GC	Tfap2c
1048	Alas1	1.63198997850075e-114	0.482763862325612	0.293	0.122	3.51090004074867e-110	GC	Alas1
1049	Magi1	1.65736464893195e-114	0.471746386332396	0.855	0.732	3.56548856924731e-110	GC	Magi1
1050	Arhgap31	3.49903007213565e-114	0.339223614172191	0.917	0.778	7.52746339418542e-110	GC	Arhgap31
1051	Adgrl1	4.97504904964937e-114	0.470463436366364	0.332	0.144	1.07028230205107e-109	GC	Adgrl1
1052	Gm38399	8.62300629148297e-114	0.527582183730591	0.555	0.339	1.85506734348673e-109	GC	Gm38399
1053	Lrch11	1.07670785499283e-113	0.336680636082472	0.917	0.708	2.31632160844607e-109	GC	Lrch1
1054	Stat3	1.30541070220934e-112	0.458977711531839	0.57	0.355	2.80833004366296e-108	GC	Stat3
1055	Trak1	1.61165265910977e-112	0.458840208212975	0.673	0.471	3.46714836554285e-108	GC	Trak1
1056	Pde8a	1.72514077151891e-112	0.439955073695981	0.528	0.303	3.71129534176862e-108	GC	Pde8a
1057	Chsy3	3.5734462916251e-111	0.308653051512741	0.642	0.381	7.68755500717309e-107	GC	Chsy3
1058	Rnf157	4.76561746844947e-110	0.442293357976095	0.45	0.237	1.02522728598753e-105	GC	Rnf157
1059	Slc44a2	1.9807061435787e-109	0.459972716543363	0.545	0.331	4.26109312668086e-105	GC	Slc44a2
1060	Ralgps2	6.39905503952929e-109	0.523022021630415	0.558	0.353	1.37662871065394e-104	GC	Ralgps2
1061	Agap3	3.69929177787262e-108	0.451188463185435	0.554	0.346	7.95828640173736e-104	GC	Agap3
1062	Hk1	5.73660637074532e-108	0.490661145030856	0.308	0.136	1.23411612853844e-103	GC	Hk1
1063	Sri	1.19845169606544e-107	0.461467028979114	0.477	0.276	2.57822913374557e-103	GC	Sri
1064	Arhgef11	3.71504350449912e-107	0.419047757243691	0.769	0.607	7.99217309122895e-103	GC	Arhgef11
1065	Dock5	6.64500010621062e-106	0.30447865992767	0.855	0.629	1.42953887284909e-101	GC	Dock5
1066	Pgm1	7.7339495843586e-106	0.416032003524137	0.287	0.119	1.66380457408307e-101	GC	Pgm1
1067	Efhd2	4.44869795748366e-104	0.447198265157282	0.335	0.154	9.57048391593461e-100	GC	Efhd2
1068	Il1r1	1.65943908136329e-103	0.429820146919389	0.292	0.125	3.56995129573684e-99	GC	Il1r1
1069	Tmc5	4.7537686678931e-103	0.455425896339834	0.383	0.191	1.02267825352384e-98	GC	Tmc5
1070	Amz1	5.07994053822476e-103	0.428920200779423	0.274	0.114	1.09284760798829e-98	GC	Amz1
1071	Phactr2	1.37163244522281e-101	0.552985322127398	0.47	0.279	2.95079287940783e-97	GC	Phactr2
1072	Brpf3	7.60452969693495e-101	0.426381187959632	0.645	0.455	1.63596247370162e-96	GC	Brpf3
1073	Fermt2	7.43463188055905e-100	0.380202831311308	0.785	0.617	1.59941235646467e-95	GC	Fermt2
1074	Cyth3	4.93189505443968e-99	0.386458800528433	0.624	0.409	1.06099858306161e-94	GC	Cyth3
1075	Serpinb9d	7.46671360440073e-99	0.49109302316327	0.268	0.112	1.60631409771473e-94	GC	Serpinb9d
1076	Cdk14	8.35621365903897e-98	0.342504602197541	0.802	0.62	1.79767224446905e-93	GC	Cdk14
1077	Arhgap101	1.24768954348794e-96	0.287418944999555	0.991	0.965	2.68415451490561e-92	GC	Arhgap10
1078	Tnks	5.8804872958783e-96	0.422917006912901	0.658	0.48	1.2650692319623e-91	GC	Tnks
1079	Pdlim5	1.06786844282016e-95	0.468881999415311	0.702	0.547	2.297305381039e-91	GC	Pdlim5
1080	Sparc	1.49105179699981e-95	0.435104389344798	0.38	0.197	3.20769973088569e-91	GC	Sparc
1081	Dnm2	2.08955318004397e-95	0.331862127464661	0.854	0.729	4.49525575622859e-91	GC	Dnm2
1082	Ttc28	7.23145057137335e-95	0.454725687212674	0.316	0.149	1.55570196141955e-90	GC	Ttc28
1083	Soat1	1.84940366948887e-94	0.477014676954813	0.411	0.226	3.9786221141714e-90	GC	Soat1
1084	Ptpn14	1.54433314958447e-92	0.381818821877298	0.435	0.235	3.32232390470107e-88	GC	Ptpn14
1085	Rabgap1l	3.14818243898875e-92	0.446886599668181	0.681	0.482	6.7726848809965e-88	GC	Rabgap1l
1086	Myo1d	9.07098792368893e-92	0.526932764432706	0.741	0.609	1.9514416320232e-87	GC	Myo1d
1087	Pld1	3.83628456272818e-91	0.424625439087057	0.495	0.304	8.25299897979712e-87	GC	Pld1
1088	Ahnak1	7.273921091173e-91	0.307912380454343	0.788	0.574	1.56483864434405e-86	GC	Ahnak
1089	Lpp	9.61919493485857e-91	0.306209908670436	0.956	0.879	2.06937740633613e-86	GC	Lpp
1090	Atp8a1	1.06586090005519e-90	0.481558479469087	0.309	0.148	2.29298655428873e-86	GC	Atp8a1
1091	Tex2	2.0986361458216e-90	0.389870295570162	0.731	0.563	4.51479594050601e-86	GC	Tex2
1092	Sec24d	2.33311180046588e-90	0.383589552952103	0.442	0.243	5.01922341634224e-86	GC	Sec24d
1093	Arhgap21	1.33949473798435e-89	0.385894314025792	0.676	0.494	2.88165502982573e-85	GC	Arhgap21
1094	Nectin2	1.56533656347587e-88	0.433591841697338	0.493	0.307	3.36750854900563e-84	GC	Nectin2
1095	Sbf1	6.75718062611158e-87	0.445390313668758	0.371	0.201	1.45367226809538e-82	GC	Sbf1
1096	Fndc3a	1.21422894031412e-86	0.368231777811638	0.742	0.568	2.61217071929778e-82	GC	Fndc3a
1097	Dip2b	2.84406113847381e-86	0.334649975695668	0.839	0.696	6.11842872719871e-82	GC	Dip2b
1098	Tor1aip2	8.62658327734752e-86	0.38579647463807	0.697	0.536	1.85583686045577e-81	GC	Tor1aip2
1099	Auts2	4.20458019443866e-85	0.274439135533773	0.94	0.861	9.04531337229589e-81	GC	Auts2
1100	Ulk2	4.94064496403829e-85	0.414636612660025	0.515	0.331	1.06288095111356e-80	GC	Ulk2
1101	Grb2	1.013157525573e-84	0.336172849254452	0.775	0.622	2.17960578476519e-80	GC	Grb2
1102	Plcl2	2.54963692703633e-84	0.418195410765174	0.383	0.209	5.48503392113325e-80	GC	Plcl2
1103	Fam83b	1.12964703528999e-83	0.390828426890512	0.409	0.228	2.43020966701936e-79	GC	Fam83b
1104	Noct	2.10679093331929e-82	0.343175326230044	0.785	0.654	4.53233933484979e-78	GC	Noct
1105	Atrx	1.83710662941703e-81	0.34219981016104	0.713	0.55	3.95216749186485e-77	GC	Atrx
1106	Ostf1	9.85521809613832e-81	0.415606303525923	0.486	0.311	2.12015306902224e-76	GC	Ostf1
1107	Zdhhc21	2.28022327708991e-80	0.410935112113308	0.469	0.296	4.90544433600351e-76	GC	Zdhhc21
1108	Tfpi	4.5224511966381e-80	0.391496282593867	0.399	0.227	9.72914925932754e-76	GC	Tfpi
1109	Mcc	4.76780641769836e-80	0.431957474500995	0.308	0.152	1.02569819463945e-75	GC	Mcc
1110	Klf13	4.78722339671384e-80	0.33520699174114	0.641	0.445	1.02987536933505e-75	GC	Klf13
1111	Palld	5.53831005607431e-80	0.418673000447596	0.399	0.227	1.19145664236327e-75	GC	Palld
1112	Rnf169	1.68900562016416e-79	0.391225702596585	0.55	0.371	3.63355779065916e-75	GC	Rnf169
1113	Slc4a7	1.48307812656869e-78	0.424014735018821	0.317	0.161	3.19054597368723e-74	GC	Slc4a7
1114	Slc25a21	3.67489186456989e-78	0.424172426368513	0.368	0.201	7.90579486824921e-74	GC	Slc25a21
1115	Mpdz	6.65581558462576e-78	0.373370453994668	0.319	0.163	1.43186560672054e-73	GC	Mpdz
1116	Rbpms	1.44423735818561e-77	0.351969755535695	0.78	0.625	3.1069878286647e-73	GC	Rbpms
1117	Iqgap1	4.46366497807791e-77	0.331119679386253	0.817	0.693	9.60268246733902e-73	GC	Iqgap1
1118	Fn1	4.93281281693545e-77	0.292984335370992	0.814	0.638	1.06119602130732e-72	GC	Fn1
1119	Spata6	6.88506667812036e-77	0.387808983901903	0.287	0.14	1.48118439446403e-72	GC	Spata6
1120	Sema4d	1.22308817000392e-76	0.34899428859365	0.649	0.476	2.63122958012943e-72	GC	Sema4d
1121	Ldlr	3.82623035506107e-76	0.370028999868619	0.625	0.446	8.23136936284287e-72	GC	Ldlr
1122	Ppp4r1	4.98760166949172e-76	0.406874859105757	0.524	0.358	1.07298274715775e-71	GC	Ppp4r1
1123	Tshz1	7.59103055106203e-76	0.411651354121716	0.359	0.197	1.63305840244997e-71	GC	Tshz1
1124	P4ha1	5.55151021586126e-75	0.393981268976473	0.386	0.222	1.19429639273823e-70	GC	P4ha1
1125	Dock4	7.45782161886735e-75	0.411951825363462	0.44	0.266	1.60440116486693e-70	GC	Dock4
1126	Litaf	2.22566990732632e-74	0.372293255786315	0.55	0.371	4.78808367163112e-70	GC	Litaf
1127	Znrf1	2.81059639040079e-74	0.350097231106981	0.564	0.379	6.04643601466922e-70	GC	Znrf1
1128	Ptk2	2.08478022323937e-73	0.290602344928399	0.855	0.749	4.48498769425486e-69	GC	Ptk2
1129	Tmsb10	1.33078029904956e-72	0.388145417126432	0.253	0.12	2.86290765734532e-68	GC	Tmsb10
1130	Ptpra	1.08470674896962e-67	0.361325802687513	0.544	0.381	2.33352962905835e-63	GC	Ptpra
1131	Kif2a	2.03152246796668e-67	0.3921678378935	0.49	0.333	4.37041428533672e-63	GC	Kif2a
1132	Arpc2	2.4420024118568e-66	0.337012281514168	0.673	0.551	5.25347978862754e-62	GC	Arpc2
1133	Cfap20	3.39468588177196e-66	0.379011662317474	0.314	0.172	7.30298773745602e-62	GC	Cfap20
1134	Morf4l2	6.68320145180635e-66	0.358771954786877	0.625	0.478	1.4377571283271e-61	GC	Morf4l2
1135	Copz2	2.20945961802728e-65	0.341095090920614	0.263	0.131	4.75321047626208e-61	GC	Copz2
1136	Gmip	4.81331333225619e-65	0.370975955168375	0.441	0.284	1.03548809716827e-60	GC	Gmip
1137	Rasa2	7.51748950226464e-65	0.35790933484153	0.55	0.395	1.61723751662219e-60	GC	Rasa2
1138	Arhgef2	8.36401042509538e-63	0.358000841323992	0.365	0.216	1.79934956275077e-58	GC	Arhgef2
1139	Gm20696	2.53090533527619e-61	0.357522248897084	0.305	0.165	5.44473664777966e-57	GC	Gm20696
1140	Tanc2	2.67001468459096e-61	0.259713452520824	0.813	0.694	5.74400259096054e-57	GC	Tanc2
1141	Tmcc1	6.19684748733208e-61	0.34062063283735	0.749	0.644	1.33312779994975e-56	GC	Tmcc1
1142	Raf1	1.1981499351867e-60	0.317644462864689	0.609	0.461	2.57757995556715e-56	GC	Raf1
1143	Snx71	2.77738662598465e-60	0.339209570503033	0.377	0.227	5.97499184848077e-56	GC	Snx7
1144	Nr2f2	5.49831026786161e-60	0.322783704612066	0.347	0.199	1.18285148792507e-55	GC	Nr2f2
1145	Ammecr1	7.09706049463733e-60	0.349087941986466	0.332	0.19	1.52679062421133e-55	GC	Ammecr1
1146	Glud1	5.3338265100863e-59	0.373468130275107	0.371	0.227	1.14746609711487e-54	GC	Glud1
1147	Capn15	5.41321683608516e-59	0.304229016092772	0.618	0.465	1.164545337947e-54	GC	Capn15
1148	Plac1	6.50972789831576e-59	0.274292218741431	0.687	0.513	1.40043776276467e-54	GC	Plac1
1149	Gnai2	1.8932292810916e-58	0.361886900385379	0.458	0.313	4.07290415241235e-54	GC	Gnai2
1150	Tjp1	7.20721051989287e-58	0.311721739740195	0.622	0.475	1.55048719914455e-53	GC	Tjp1
1151	Tmem191c	5.51634748159864e-57	0.350664328281359	0.326	0.192	1.18673183371632e-52	GC	Tmem191c
1152	Eef2k	1.03248262863998e-56	0.325852538481237	0.475	0.318	2.22117987899319e-52	GC	Eef2k
1153	Cntrl	1.52294367198156e-56	0.339152409264692	0.308	0.175	3.27630872153392e-52	GC	Cntrl
1154	Phldb2	1.44435386734344e-55	0.292814538366545	0.579	0.416	3.10723847481595e-51	GC	Phldb2
1155	Psip1	5.44777429189428e-55	0.320013647515687	0.424	0.277	1.17197968341522e-50	GC	Psip1
1156	Sash1	5.67510718404962e-54	0.293912549368654	0.613	0.468	1.2208858085046e-49	GC	Sash1
1157	Itgav	9.88672269304568e-54	0.293872033464904	0.529	0.371	2.12693065295492e-49	GC	Itgav
1158	Xiap	1.36884531302245e-53	0.329903161458591	0.5	0.357	2.9447969219052e-49	GC	Xiap
1159	Bend6	2.61669226634568e-53	0.322541781093577	0.267	0.144	5.62929007258946e-49	GC	Bend6
1160	Colgalt1	2.93271494678224e-53	0.318847993822713	0.323	0.189	6.30914966501263e-49	GC	Colgalt1
1161	Liph	3.48316218404484e-53	0.314080513665033	0.36	0.218	7.49332680653566e-49	GC	Liph
1162	Zdhhc8	9.91642256956933e-53	0.314672384004261	0.326	0.192	2.13331998739145e-48	GC	Zdhhc8
1163	Aff4	1.96141797327599e-52	0.314086126242578	0.642	0.518	4.21959848590863e-48	GC	Aff4
1164	Hic2	7.48188550613594e-52	0.28954570305272	0.639	0.509	1.60957802893502e-47	GC	Hic2
1165	Sh3bp4	7.75589917839768e-52	0.353696063379799	0.322	0.192	1.66852659024869e-47	GC	Sh3bp4
1166	Trim26	4.96711913355638e-51	0.341591846922545	0.403	0.268	1.06857633920198e-46	GC	Trim26
1167	Mvb12b	5.64069687789649e-51	0.298104934909797	0.29	0.162	1.21348311934187e-46	GC	Mvb12b
1168	Fgd6	1.11417419173111e-50	0.294274535616267	0.572	0.413	2.39692293867113e-46	GC	Fgd6
1169	Ptk2b	1.14253365498025e-50	0.28682201232712	0.254	0.135	2.45793265195901e-46	GC	Ptk2b
1170	Zcchc14	3.78421235402962e-50	0.299764257984578	0.506	0.36	8.14097603722392e-46	GC	Zcchc14
1171	Crtc3	2.15690423478368e-49	0.273526682802304	0.513	0.364	4.64014808029013e-45	GC	Crtc3
1172	Tmem131	1.44650789871469e-47	0.276993279059101	0.418	0.275	3.11187244250491e-43	GC	Tmem131
1173	Abl1	3.8722228698696e-47	0.312364709612273	0.531	0.397	8.33031305995048e-43	GC	Abl1
1174	Gan	6.14306148075068e-47	0.329079606868008	0.262	0.148	1.32155681635389e-42	GC	Gan
1175	Mfhas1	7.89377930491498e-47	0.278073416024801	0.318	0.187	1.69818874186636e-42	GC	Mfhas1
1176	Ccnl21	1.33516325101504e-46	0.282631554289911	0.654	0.533	2.87233670190865e-42	GC	Ccnl2
1177	Pacsin2	1.55026377658246e-46	0.261408028758148	0.682	0.545	3.33508246256185e-42	GC	Pacsin2
1178	Actr2	3.06993285661318e-46	0.27237866081548	0.67	0.557	6.60434655443193e-42	GC	Actr2
1179	Slc7a71	3.0810611335642e-46	0.311293194845464	0.282	0.165	6.62828681663666e-42	GC	Slc7a7
1180	Plekhg2	6.97194921265728e-46	0.30852086673492	0.405	0.275	1.49987543411896e-41	GC	Plekhg2
1181	Ssh1	7.85517306647746e-46	0.366900706238466	0.34	0.22	1.6898833817913e-41	GC	Ssh1
1182	Egln1	2.00849915488224e-45	0.333064359942289	0.314	0.192	4.32088423189817e-41	GC	Egln1
1183	Tmeff1	2.1816942025782e-45	0.281485186543774	0.519	0.383	4.69347873800649e-41	GC	Tmeff1
1184	Pkp2	9.30697714763647e-45	0.287222496097109	0.539	0.403	2.00220999377103e-40	GC	Pkp2
1185	Vasp	1.32111636144529e-44	0.309542262254521	0.43	0.302	2.84211762837725e-40	GC	Vasp
1186	C1galt1	1.947095244899e-44	0.289768178621765	0.356	0.228	4.18878600035121e-40	GC	C1galt1
1187	Elovl5	5.34089940506851e-44	0.255492388453617	0.412	0.269	1.14898768901239e-39	GC	Elovl5
1188	Akap7	6.20456621455485e-44	0.326895487550536	0.325	0.204	1.33478832973718e-39	GC	Akap7
1189	Nrip1	1.92736734699955e-43	0.347763912347202	0.732	0.623	4.14634537360013e-39	GC	Nrip1
1190	Elf2	3.22172201551921e-43	0.259155640314643	0.56	0.42	6.93089057198648e-39	GC	Elf2
1191	Gnai3	4.05119332811113e-43	0.322405768996312	0.506	0.383	8.71533220676548e-39	GC	Gnai3
1192	Acsl4	2.15787646311938e-41	0.286717455236684	0.373	0.249	4.64223963510872e-37	GC	Acsl4
1193	Ryk	3.68829798987645e-41	0.329478090699726	0.407	0.288	7.9346354656212e-37	GC	Ryk
1194	Anapc5	5.11593023490651e-41	0.267366921624911	0.432	0.302	1.10059007143544e-36	GC	Anapc5
1195	Il6st	6.03830507568578e-41	0.287118323791168	0.369	0.245	1.29902057093228e-36	GC	Il6st
1196	Stx21	6.23628238750444e-41	0.292634105322991	0.264	0.157	1.34161143002383e-36	GC	Stx2
1197	Anxa7	7.33371033415667e-41	0.302214062452451	0.374	0.255	1.57770110418712e-36	GC	Anxa7
1198	Cabin1	1.16251132338362e-40	0.33442977027494	0.472	0.359	2.50091060999517e-36	GC	Cabin1
1199	Heg1	1.27322738685635e-40	0.287212925600105	0.3	0.184	2.73909407734407e-36	GC	Heg1
1200	Fbxo11	2.11032296461364e-40	0.277993456480127	0.646	0.532	4.53993779377331e-36	GC	Fbxo11
1201	Ift43	3.43668355312367e-40	0.282043220471824	0.527	0.406	7.39333732783495e-36	GC	Ift43
1202	Dpy19l1	5.45920424485101e-40	0.253031352123448	0.286	0.172	1.1744386091948e-35	GC	Dpy19l1
1203	Aprt	1.09594689037764e-38	0.28069654981106	0.375	0.261	2.35771054526941e-34	GC	Aprt
1204	Slc30a7	2.38466397512018e-38	0.257819928440789	0.475	0.346	5.13012760967605e-34	GC	Slc30a7
1205	Ubr2	8.13303173693575e-38	0.26830170680346	0.576	0.465	1.74965911756699e-33	GC	Ubr2
1206	Naa16	1.79826486042681e-37	0.267654620385738	0.454	0.332	3.86860719423619e-33	GC	Naa16
1207	Dopey2	7.69227836116357e-37	0.281558043626766	0.278	0.174	1.65483984383712e-32	GC	Dopey2
1208	Tead41	1.0045130468154e-36	0.299012919216105	0.45	0.33	2.16100891761397e-32	GC	Tead4
1209	Bicc1	1.13097289022828e-36	0.26425549972638	0.252	0.148	2.43306197874811e-32	GC	Bicc1
1210	Lpgat1	1.41296866449442e-36	0.288520021736024	0.335	0.224	3.03971948792685e-32	GC	Lpgat1
1211	Mon2	8.44228866644211e-36	0.278549119962423	0.461	0.346	1.81618956081169e-31	GC	Mon2
1212	Baz2b	9.52579132571242e-36	0.290949297849919	0.415	0.301	2.04928348790051e-31	GC	Baz2b
1213	Picalm	1.30046945107152e-35	0.274557624943288	0.466	0.352	2.79769993009017e-31	GC	Picalm
1214	Tbc1d22b	3.54580598329112e-35	0.259477160430648	0.345	0.233	7.62809241185418e-31	GC	Tbc1d22b
1215	Mxd41	3.66636947819783e-35	0.266886462958858	0.255	0.157	7.887460658447e-31	GC	Mxd4
1216	Ubl3	5.90661325421266e-35	0.277633298681369	0.376	0.262	1.27068970937877e-30	GC	Ubl3
1217	Cited2	2.46500193079171e-34	0.272774008914922	0.34	0.23	5.3029586537122e-30	GC	Cited2
1218	Cd82	3.93854717693799e-34	0.268451670874917	0.276	0.174	8.4729965417467e-30	GC	Cd82
1219	Bcar1	3.23331764217307e-33	0.27080900636458	0.334	0.23	6.95583624360692e-29	GC	Bcar1
1220	Tinagl11	3.44356242208022e-33	0.325638345097655	0.265	0.171	7.40813583862118e-29	GC	Tinagl1
1221	Slc6a61	5.70339966873858e-33	0.281417369459875	0.6	0.497	1.22697237073573e-28	GC	Slc6a6
1222	Stim11	7.42778481231233e-33	0.259373278444829	0.485	0.368	1.59793934667275e-28	GC	Stim1
1223	Tpk1	9.35319323750186e-32	0.254709503442186	0.431	0.322	2.01215246118378e-27	GC	Tpk1
1224	Tmem65	1.26603582872653e-31	0.275220559693368	0.262	0.169	2.72362287833938e-27	GC	Tmem65
1225	Abr	2.67729451487925e-31	0.261363120757282	0.298	0.198	5.75966368985974e-27	GC	Abr
1226	Zbtb20	1.36090661401907e-30	0.261924816570903	0.473	0.365	2.92771839873923e-26	GC	Zbtb20
1227	Itgb1	7.41594820709446e-30	0.250667809996579	0.526	0.427	1.59539293779223e-25	GC	Itgb1
1228	Sqstm1	2.47988476469544e-29	0.253751059051193	0.41	0.306	5.33497609428929e-25	GC	Sqstm1
1229	Elovl6	1.72918394348451e-24	0.250190185228653	0.401	0.302	3.71999341761823e-20	GC	Elovl6
1230	Tead11	2.99304020223868e-22	0.289052488498476	0.647	0.562	6.43892738707607e-18	GC	Tead1
1231	Prl7d1	9.42316048908437e-17	0.402485348129319	0.293	0.229	2.02720451601672e-12	GC	Prl7d1
1232	Prex1	2.03385932505204e-09	0.305643124179005	0.329	0.292	4.37544156598446e-05	GC	Prex1
1233	Prune21	0	1.13049935212769	0.964	0.579	0	JZP 2	Prune2
1234	Tmem132e1	0	1.03506131235823	0.586	0.171	0	JZP 2	Tmem132e
1235	Rab8b1	0	1.03471280108008	0.763	0.341	0	JZP 2	Rab8b
1236	Ppp2r2c1	0	1.02301636902386	0.821	0.34	0	JZP 2	Ppp2r2c
1237	1500009L16Rik1	0	1.00429614403381	0.587	0.195	0	JZP 2	1500009L16Rik
1238	Piezo21	0	0.939944690104061	0.617	0.243	0	JZP 2	Piezo2
1239	Tiam11	0	0.907288211912538	0.895	0.54	0	JZP 2	Tiam1
1240	Fam168a1	0	0.701027605792409	0.92	0.694	0	JZP 2	Fam168a
1241	Anxa111	4.02995626532675e-286	0.716884709775074	0.841	0.52	8.66964491359743e-282	JZP 2	Anxa11
1242	Itga9	8.75473846373289e-286	0.892802728414826	0.505	0.182	1.88340688570286e-281	JZP 2	Itga9
1243	Trio1	1.17847813039484e-283	0.619073113368231	0.939	0.747	2.53526000191841e-279	JZP 2	Trio
1244	Cald11	5.87215015821384e-264	0.592746756757156	0.936	0.767	1.26327566353654e-259	JZP 2	Cald1
1245	Chsy1	1.93298819261363e-249	0.801097401016798	0.654	0.334	4.15843749876971e-245	JZP 2	Chsy1
1246	Tiam21	4.54213434062666e-246	0.693861213817686	0.71	0.352	9.77149360699013e-242	JZP 2	Tiam2
1247	Ano61	1.13068321236981e-245	0.631621581009151	0.881	0.635	2.43243879477117e-241	JZP 2	Ano6
1248	Pde4dip1	1.08252181063134e-241	0.658145625547298	0.83	0.565	2.32882917121119e-237	JZP 2	Pde4dip
1249	Actn11	1.33433150174186e-241	0.683823306506747	0.788	0.485	2.87054735969727e-237	JZP 2	Actn1
1250	Sgpp21	1.38460312441639e-231	0.772806225486935	0.628	0.312	2.97869670155698e-227	JZP 2	Sgpp2
1251	Gm383991	4.08587552308911e-229	0.806051330761029	0.639	0.332	8.7899440128216e-225	JZP 2	Gm38399
1252	P3h21	2.12952318956549e-224	0.731136194179358	0.608	0.288	4.58124323771224e-220	JZP 2	P3h2
1253	Lrrc8c	4.66405294581224e-221	0.754333736405717	0.634	0.334	1.00337771023259e-216	JZP 2	Lrrc8c
1254	Ncam11	2.38129946564063e-216	0.618715336848297	0.848	0.584	5.12288954043269e-212	JZP 2	Ncam1
1255	Cdhr51	1.05715809230103e-213	0.741006529709729	0.436	0.162	2.27426420396721e-209	JZP 2	Cdhr5
1256	Prex21	9.0923122851241e-211	0.692413630008875	0.646	0.343	1.95602914189875e-206	JZP 2	Prex2
1257	Dst1	1.97690043271347e-209	0.452894856107711	0.986	0.902	4.2529059008965e-205	JZP 2	Dst
1258	Dock11	1.15634169431379e-202	0.553451471655896	0.896	0.716	2.48763788697727e-198	JZP 2	Dock1
1259	Pitrm11	2.8545039007544e-200	0.699427247534996	0.642	0.357	6.14089424169295e-196	JZP 2	Pitrm1
1260	Nr2f21	2.24467219546822e-196	0.776009282048574	0.449	0.188	4.82896329411078e-192	JZP 2	Nr2f2
1261	Rffl1	1.63413574467501e-193	0.588999563499013	0.85	0.65	3.51551622751935e-189	JZP 2	Rffl
1262	Mast41	2.47120690471161e-178	0.668953875762158	0.8	0.599	5.31630741410609e-174	JZP 2	Mast4
1263	Chst111	8.71983559427971e-171	0.594143392670156	0.692	0.388	1.87589823139739e-166	JZP 2	Chst11
1264	Car21	5.22029681860502e-169	0.601493189532655	0.653	0.383	1.1230424545865e-164	JZP 2	Car2
1265	Gna141	2.36187762939455e-166	0.539492827131197	0.633	0.328	5.0811073441165e-162	JZP 2	Gna14
1266	Sema3e1	1.61038115697446e-162	0.62199967120662	0.728	0.483	3.46441298299916e-158	JZP 2	Sema3e
1267	Fam78b1	1.51195247483309e-161	0.607223462776339	0.783	0.563	3.25266335910843e-157	JZP 2	Fam78b
1268	Etv61	7.28815064726362e-161	0.578241271475538	0.848	0.682	1.56789984874582e-156	JZP 2	Etv6
1269	Fat1	8.9618701393518e-160	0.638724027708709	0.613	0.364	1.92796712307875e-155	JZP 2	Fat1
1270	Pip4k2a	1.28978223105881e-157	0.692648829947909	0.513	0.263	2.77470851367681e-153	JZP 2	Pip4k2a
1271	Rai1	1.47618044775573e-157	0.65715381833387	0.603	0.346	3.17570699725689e-153	JZP 2	Rai1
1272	Adgrg61	6.55551355890667e-157	0.552916877115136	0.756	0.508	1.41028763192759e-152	JZP 2	Adgrg6
1273	Plac11	1.43223026156575e-156	0.603127853861007	0.744	0.509	3.0811569617064e-152	JZP 2	Plac1
1274	Srgap21	8.67899276060547e-155	0.507721167943956	0.811	0.611	1.86711171258905e-150	JZP 2	Srgap2
1275	Sct1	2.02708479334217e-154	0.657492156905014	0.61	0.366	4.36086751591702e-150	JZP 2	Sct
1276	Nav11	4.84072034832189e-152	0.551882046048767	0.753	0.535	1.04138416853449e-147	JZP 2	Nav1
1277	Gfod11	9.06140581757906e-152	0.573555397534936	0.694	0.426	1.94938023353578e-147	JZP 2	Gfod1
1278	Cacnb4	5.89619431833547e-151	0.770261060823124	0.261	0.08	1.26844828370351e-146	JZP 2	Cacnb4
1279	Frmd4a1	1.52424968078328e-150	0.391744212092551	0.842	0.617	3.27911833826907e-146	JZP 2	Frmd4a
1280	Basp11	4.08637115576866e-150	0.442713979014821	0.919	0.823	8.79101026740512e-146	JZP 2	Basp1
1281	Mgat51	2.96445594250597e-148	0.499699611566542	0.857	0.701	6.37743406911309e-144	JZP 2	Mgat5
1282	Palm1	5.46324411657368e-146	0.595845984176507	0.6	0.355	1.1753077067985e-141	JZP 2	Palm
1283	Mpzl11	1.37380616976695e-139	0.53765015836112	0.77	0.597	2.95546921301964e-135	JZP 2	Mpzl1
1284	Lgals91	8.80542930575815e-139	0.512965409095582	0.744	0.521	1.89431200654775e-134	JZP 2	Lgals9
1285	Coro2a1	1.3927463329162e-138	0.625901857142123	0.438	0.207	2.99621518600262e-134	JZP 2	Coro2a
1286	Nostrin1	7.88512057299888e-138	0.600268845758413	0.533	0.292	1.69632598886925e-133	JZP 2	Nostrin
1287	Grb21	1.3860638551943e-135	0.505997837507573	0.783	0.624	2.9818391716795e-131	JZP 2	Grb2
1288	Fstl3	6.8188423922821e-134	0.670300542625482	0.369	0.163	1.46693756385165e-129	JZP 2	Fstl3
1289	Ntn1	6.32431484036419e-131	0.688534062480354	0.467	0.239	1.36054985160755e-126	JZP 2	Ntn1
1290	Sema4d1	1.19277367849266e-128	0.55910858077031	0.672	0.476	2.56601401454125e-124	JZP 2	Sema4d
1291	Pdzrn3	2.36209897107274e-128	0.72438423882385	0.5	0.274	5.0815835164688e-124	JZP 2	Pdzrn3
1292	Rassf4	5.80160857165486e-126	0.53788303991331	0.264	0.092	1.24810005202011e-121	JZP 2	Rassf4
1293	Wipf11	1.68063667121824e-123	0.521986320521498	0.665	0.432	3.6155536707918e-119	JZP 2	Wipf1
1294	Gm47283	1.9688913470825e-123	0.30566616785621	0.981	0.946	4.23567595497859e-119	JZP 2	Gm47283
1295	Frmd4b1	1.69796187975465e-119	0.368273534954283	0.703	0.457	3.65282539191618e-115	JZP 2	Frmd4b
1296	Cdh51	1.66838588030572e-118	0.559113856048984	0.534	0.315	3.58919854430169e-114	JZP 2	Cdh5
1297	Nav3	9.47756789529382e-118	0.572750486948059	0.545	0.329	2.03890918131456e-113	JZP 2	Nav3
1298	Arid5b1	1.51332200089495e-117	0.373023755099327	0.943	0.848	3.25560962052531e-113	JZP 2	Arid5b
1299	Snd1	1.9907644171956e-117	0.352160111275171	0.952	0.91	4.2827314907129e-113	JZP 2	Snd1
1300	Rps6ka21	2.59745018426682e-117	0.555252912858882	0.515	0.291	5.58789458141321e-113	JZP 2	Rps6ka2
1301	Elovl51	6.49880697108224e-116	0.569748671822967	0.476	0.263	1.39808834368892e-111	JZP 2	Elovl5
1302	Slco3a11	6.94983475097179e-115	0.600287404885224	0.507	0.279	1.49511794997656e-110	JZP 2	Slco3a1
1303	Il6st1	2.39852252328708e-113	0.598438835544664	0.437	0.239	5.1599415043475e-109	JZP 2	Il6st
1304	Mthfd1l	1.11913164742384e-109	0.554645784180191	0.559	0.343	2.40758791310292e-105	JZP 2	Mthfd1l
1305	Pxn	3.26379805700748e-106	0.544371693785118	0.632	0.454	7.02140876004019e-102	JZP 2	Pxn
1306	Ncmap1	9.66710306335488e-103	0.54112561204459	0.416	0.218	2.07968388201954e-98	JZP 2	Ncmap
1307	Iffo11	9.24094064574741e-102	0.545734790943781	0.308	0.135	1.98800356111964e-97	JZP 2	Iffo1
1308	Nckap5l1	4.64451855992841e-101	0.539168159734145	0.34	0.158	9.991752777974e-97	JZP 2	Nckap5l
1309	Mid1	1.68134607724252e-100	0.486675843461865	0.715	0.559	3.61707981597184e-96	JZP 2	Mid1
1310	Dlc1	2.65163523029653e-100	0.440460747744412	0.755	0.605	5.70446287093693e-96	JZP 2	Dlc1
1311	Zeb1	4.89727414317011e-99	0.570266328432046	0.377	0.195	1.05355058642019e-94	JZP 2	Zeb1
1312	Hpcal11	4.71100914537463e-98	0.451090611053345	0.598	0.385	1.01347939744445e-93	JZP 2	Hpcal1
1313	Arhgap221	4.00964593411798e-97	0.500739965324872	0.555	0.352	8.625951298068e-93	JZP 2	Arhgap22
1314	Pros11	8.42923538026481e-97	0.548073764489189	0.446	0.259	1.81338140735637e-92	JZP 2	Pros1
1315	Tnfaip81	1.40536501788181e-96	0.352920684832997	0.617	0.4	3.02336176296915e-92	JZP 2	Tnfaip8
1316	Rap1a1	2.18269482837319e-94	0.440118881672982	0.688	0.534	4.69563138427924e-90	JZP 2	Rap1a
1317	Liph1	2.52316433152404e-94	0.526937269406609	0.399	0.216	5.42808342640768e-90	JZP 2	Liph
1318	Arntl1	5.98316789503471e-94	0.541004186762401	0.462	0.266	1.28715890925882e-89	JZP 2	Arntl
1319	Braf1	3.00667629019802e-91	0.358720332821568	0.834	0.753	6.46826270310299e-87	JZP 2	Braf
1320	E2f3	2.07272320328339e-90	0.464814937754763	0.621	0.442	4.45904942722356e-86	JZP 2	E2f3
1321	Bcar3	6.35928103487239e-86	0.3483677786999	0.797	0.626	1.3680721290321e-81	JZP 2	Bcar3
1322	Gng12	1.05469277853385e-84	0.355545597703271	0.867	0.79	2.26896057445988e-80	JZP 2	Gng12
1323	Adcy7	3.4520341432044e-83	0.406769097290841	0.714	0.532	7.42636105227562e-79	JZP 2	Adcy7
1324	Tpm11	3.81316003059149e-82	0.400971449874519	0.702	0.554	8.20325117381148e-78	JZP 2	Tpm1
1325	Syde11	2.4138032374507e-78	0.491042123870451	0.313	0.157	5.19281490472769e-74	JZP 2	Syde1
1326	Tspan18	7.2931332316239e-78	0.474773278907938	0.302	0.146	1.56897175211925e-73	JZP 2	Tspan18
1327	Fryl1	3.8741598563323e-75	0.358360544425907	0.756	0.634	8.33448009892768e-71	JZP 2	Fryl
1328	Nin1	1.13629355979505e-73	0.482278081758995	0.432	0.269	2.44450833518709e-69	JZP 2	Nin
1329	Phf201	1.31065546289623e-71	0.377746605246013	0.76	0.671	2.81961309732866e-67	JZP 2	Phf20
1330	Hspg21	2.14115216593957e-71	0.327186368917933	0.811	0.678	4.60626065458579e-67	JZP 2	Hspg2
1331	Atrx1	7.7375834905038e-71	0.384824669470789	0.685	0.558	1.66458633631208e-66	JZP 2	Atrx
1332	Ccser11	9.05053298138532e-71	0.292660127884502	0.816	0.678	1.94704116028542e-66	JZP 2	Ccser1
1333	Elovl61	2.13456030775169e-70	0.495244910755692	0.461	0.296	4.59207959006621e-66	JZP 2	Elovl6
1334	Vav2	3.76384062051695e-69	0.399826945711681	0.58	0.415	8.09715032691813e-65	JZP 2	Vav2
1335	Ralgps21	6.00310945854168e-68	0.489539687912362	0.513	0.364	1.29144893781607e-63	JZP 2	Ralgps2
1336	Myh9	1.65531508918405e-66	0.284055783369126	0.911	0.855	3.56107935136166e-62	JZP 2	Myh9
1337	Pvt1	8.34599000993738e-66	0.361557869189953	0.538	0.351	1.79547283083783e-61	JZP 2	Pvt1
1338	Sdk2	1.93338076835907e-64	0.285366440866426	0.522	0.338	4.15928204697088e-60	JZP 2	Sdk2
1339	Cmss1	3.96850678451758e-60	0.26713811897237	0.923	0.895	8.53744864553267e-56	JZP 2	Cmss1
1340	Hivep11	1.24284916227344e-59	0.416913739167476	0.463	0.307	2.67374140279886e-55	JZP 2	Hivep1
1341	Arpc1b1	2.21883035580916e-59	0.396100796610087	0.539	0.395	4.77336974445226e-55	JZP 2	Arpc1b
1342	Taf15	5.74542132284593e-59	0.339468302181171	0.71	0.624	1.23601248918385e-54	JZP 2	Taf15
1343	Znrf11	1.67462576934843e-58	0.414991826523497	0.53	0.388	3.60262241759928e-54	JZP 2	Znrf1
1344	Stat31	1.76929557243283e-58	0.432217962282103	0.504	0.369	3.80628556497476e-54	JZP 2	Stat3
1345	Nsd2	8.43362149818422e-58	0.341011962425294	0.657	0.535	1.81432499290437e-53	JZP 2	Nsd2
1346	Nek61	1.97860099691148e-57	0.40292739637859	0.465	0.315	4.25656432465567e-53	JZP 2	Nek6
1347	Slc35d1	2.47059966619526e-56	0.435560840788764	0.302	0.171	5.31500106188587e-52	JZP 2	Slc35d1
1348	Itpr1	1.03639540240767e-55	0.432110673832505	0.503	0.371	2.22959742919962e-51	JZP 2	Itpr1
1349	Dyrk21	2.74539363810304e-55	0.414252078328462	0.318	0.185	5.90616533365108e-51	JZP 2	Dyrk2
1350	Fam83b1	4.49510829665413e-55	0.44547450452582	0.373	0.236	9.67032647859203e-51	JZP 2	Fam83b
1351	Bicc11	2.59229633488218e-53	0.47071586151087	0.271	0.148	5.57680710523203e-49	JZP 2	Bicc1
1352	C1galt11	4.04748048963953e-53	0.443213404917264	0.362	0.23	8.70734477736152e-49	JZP 2	C1galt1
1353	Zfp64	6.16662081003009e-53	0.385869060043395	0.544	0.412	1.32662513486177e-48	JZP 2	Zfp64
1354	Ptbp31	2.10537256329483e-52	0.296744364568388	0.82	0.77	4.52928799541616e-48	JZP 2	Ptbp3
1355	Nid11	2.26247366423996e-52	0.370390147993099	0.514	0.376	4.86725959387942e-48	JZP 2	Nid1
1356	Magi11	6.83188057180345e-52	0.289032991643078	0.818	0.74	1.46974246741208e-47	JZP 2	Magi1
1357	Agap31	2.82856383834363e-51	0.398310268452117	0.486	0.36	6.08508938542865e-47	JZP 2	Agap3
1358	Pde8a1	3.60914707411346e-51	0.414770990990307	0.455	0.318	7.76435810054029e-47	JZP 2	Pde8a
1359	Lhfp1	5.78497261363155e-51	0.266455064019236	0.654	0.504	1.24452115837055e-46	JZP 2	Lhfp
1360	Rtn1	6.17060155178109e-51	0.298612359189094	0.692	0.569	1.32748151183467e-46	JZP 2	Rtn1
1361	Ptprf1	1.63124748727955e-50	0.384722077148822	0.463	0.322	3.5093027193845e-46	JZP 2	Ptprf
1362	Large1	3.71563566654723e-50	0.395145827523596	0.565	0.449	7.99344700944307e-46	JZP 2	Large1
1363	Rap1gap1	6.25922810057047e-50	0.398369927752322	0.295	0.17	1.34654774127572e-45	JZP 2	Rap1gap
1364	Gbe11	1.04049353832115e-49	0.401676605889253	0.466	0.336	2.23841374899029e-45	JZP 2	Gbe1
1365	Gpat31	1.38053296410256e-49	0.43629513391653	0.323	0.194	2.96994056567383e-45	JZP 2	Gpat3
1366	Capn151	4.38788372765947e-49	0.365172483768596	0.587	0.473	9.43965426331383e-45	JZP 2	Capn15
1367	Hjurp	6.81542506056241e-49	0.38282313269928	0.449	0.32	1.46620239327879e-44	JZP 2	Hjurp
1368	Mcph1	4.92131303000039e-48	0.349588046771256	0.575	0.444	1.05872207214398e-43	JZP 2	Mcph1
1369	Pard6g1	7.93101455293766e-48	0.338238923876076	0.645	0.527	1.70619916077348e-43	JZP 2	Pard6g
1370	Arhgap231	8.83506878193917e-48	0.309969686339973	0.737	0.656	1.90068834705857e-43	JZP 2	Arhgap23
1371	Dock41	1.11526087104257e-47	0.413200353121043	0.405	0.275	2.39926071187389e-43	JZP 2	Dock4
1372	Klf131	1.09552316446043e-46	0.364491755508191	0.579	0.457	2.35679898370371e-42	JZP 2	Klf13
1373	Mki67	1.74722140373037e-45	0.365934265965653	0.365	0.233	3.75879740584515e-41	JZP 2	Mki67
1374	Dnmt3a	2.65994566852162e-45	0.282356913086896	0.737	0.621	5.72234111669057e-41	JZP 2	Dnmt3a
1375	Zfp5321	1.11877512732619e-44	0.409690511376444	0.481	0.362	2.40682093141683e-40	JZP 2	Zfp532
1376	Fam171a11	2.88000411194004e-44	0.349510836149578	0.51	0.376	6.1957528460166e-40	JZP 2	Fam171a1
1377	Dab2ip1	4.12974485341154e-44	0.392110716139989	0.288	0.173	8.88432010314426e-40	JZP 2	Dab2ip
1378	Tpm41	7.83308822475813e-44	0.348147653670956	0.532	0.421	1.68513226979222e-39	JZP 2	Tpm4
1379	Fam126a1	8.94148329986758e-44	0.372916427887582	0.423	0.297	1.92358130230051e-39	JZP 2	Fam126a
1380	Wdr44	2.34322881094745e-43	0.421885804639556	0.304	0.192	5.04098814099125e-39	JZP 2	Wdr44
1381	Efnb2	1.35811121321774e-42	0.422467478996079	0.289	0.177	2.92170465299533e-38	JZP 2	Efnb2
1382	Myo18a	4.10171713746558e-42	0.27533602455721	0.768	0.696	8.82402407782969e-38	JZP 2	Myo18a
1383	Clic4	5.24995900128661e-42	0.303410857993694	0.701	0.621	1.12942367994679e-37	JZP 2	Clic4
1384	Mcc1	8.31626635954895e-42	0.397464324396525	0.272	0.16	1.78907838192977e-37	JZP 2	Mcc
1385	Klhl13	1.96718770251381e-41	0.29349863331016	0.799	0.715	4.23201090441796e-37	JZP 2	Klhl13
1386	Cdc14a	5.19907491945064e-41	0.345522385846799	0.28	0.167	1.11847698742142e-36	JZP 2	Cdc14a
1387	Mpdz1	6.33288113119658e-41	0.38606621142609	0.281	0.172	1.36239271775432e-36	JZP 2	Mpdz
1388	Arhgap61	1.53064271448117e-40	0.336880643778407	0.58	0.468	3.29287167166334e-36	JZP 2	Arhgap6
1389	Ahdc1	3.53842365598082e-40	0.330060220999211	0.57	0.469	7.61221081111154e-36	JZP 2	Ahdc1
1390	Sulf21	4.27495023899486e-40	0.390555870078073	0.285	0.174	9.19670044914965e-36	JZP 2	Sulf2
1391	Brpf31	1.82247113790342e-39	0.330279244480674	0.562	0.47	3.92068215897163e-35	JZP 2	Brpf3
1392	Sema6d1	1.08579797134938e-38	0.391940920676639	0.288	0.18	2.33587717576393e-34	JZP 2	Sema6d
1393	Cdyl	1.40930708317553e-38	0.282610389362739	0.671	0.581	3.03184232803551e-34	JZP 2	Cdyl
1394	Dapk11	6.04504461774655e-38	0.256852216552509	0.743	0.632	1.30047044861582e-33	JZP 2	Dapk1
1395	Lasp11	6.78059189418947e-38	0.334798576293916	0.561	0.472	1.45870873419698e-33	JZP 2	Lasp1
1396	Cit	9.2645807885018e-38	0.355287793331583	0.27	0.164	1.99308926503039e-33	JZP 2	Cit
1397	G3bp1	1.34751636393866e-37	0.338634037440438	0.489	0.388	2.89891195374125e-33	JZP 2	G3bp1
1398	Susd11	3.52602202140109e-37	0.429343614159588	0.356	0.25	7.58553117464016e-33	JZP 2	Susd1
1399	Arhgef111	1.36794993544004e-36	0.284590375167189	0.694	0.621	2.94287069611215e-32	JZP 2	Arhgef11
1400	Tex21	5.64313563551077e-36	0.300076905341044	0.659	0.577	1.21400776926743e-31	JZP 2	Tex2
1401	Frmpd11	7.18048370910239e-36	0.318326182971512	0.44	0.323	1.5447374603392e-31	JZP 2	Frmpd1
1402	Acin1	7.67098567275301e-36	0.264969815140344	0.693	0.639	1.65025914777935e-31	JZP 2	Acin1
1403	Amotl11	9.32603812812433e-36	0.394117346497745	0.324	0.223	2.00631058250339e-31	JZP 2	Amotl1
1404	Smoc1	2.02407173187716e-35	0.298479815522491	0.529	0.418	4.35438551678734e-31	JZP 2	Smoc1
1405	Taco1	4.70187741649482e-35	0.283668704857481	0.552	0.419	1.01151488861053e-30	JZP 2	Taco1
1406	Tshz11	5.87280956813332e-35	0.379489803465455	0.311	0.207	1.26341752239252e-30	JZP 2	Tshz1
1407	Lamb11	7.12028905750092e-35	0.337640836605159	0.316	0.207	1.53178778494017e-30	JZP 2	Lamb1
1408	Dyrk1a	1.30924731066834e-34	0.275864624839296	0.715	0.661	2.81658373944079e-30	JZP 2	Dyrk1a
1409	Xpo1	1.38905258519083e-34	0.283405889245704	0.637	0.569	2.98826882652102e-30	JZP 2	Xpo1
1410	Cgnl1	2.38737051297777e-34	0.262273466953183	0.682	0.595	5.13595018456907e-30	JZP 2	Cgnl1
1411	Plcl21	4.18661477500176e-34	0.378491924407911	0.322	0.221	9.00666436546128e-30	JZP 2	Plcl2
1412	Sqstm11	4.26648944223404e-34	0.355846118941341	0.407	0.309	9.17849873707809e-30	JZP 2	Sqstm1
1413	Myo1d1	4.93153927763319e-34	0.26692322397275	0.685	0.619	1.06092204479723e-29	JZP 2	Myo1d
1414	Gsn	5.06746479126341e-34	0.374076510062946	0.366	0.269	1.0901637005445e-29	JZP 2	Gsn
1415	Rnf1571	1.73915032653731e-33	0.330637244539754	0.361	0.254	3.74143409747971e-29	JZP 2	Rnf157
1416	Pltp	5.23381552388244e-33	0.357697192915644	0.261	0.166	1.12595073365283e-28	JZP 2	Pltp
1417	Raf11	5.64587737648236e-33	0.3094624442795	0.549	0.473	1.21459760000265e-28	JZP 2	Raf1
1418	Pkig	1.06380827681195e-32	0.325356756221972	0.454	0.353	2.28857074590555e-28	JZP 2	Pkig
1419	Adgrl11	1.58956886139949e-32	0.280477216802894	0.258	0.158	3.41963949152872e-28	JZP 2	Adgrl1
1420	Mical21	1.75385210376061e-32	0.319177364386309	0.459	0.352	3.77306203082021e-28	JZP 2	Mical2
1421	Hells	2.24046815335277e-32	0.327495996844633	0.283	0.183	4.81991913830782e-28	JZP 2	Hells
1422	Ezh2	2.84276701658433e-32	0.350040865394304	0.428	0.331	6.11564468277786e-28	JZP 2	Ezh2
1423	Psip11	3.68420325192535e-32	0.34203914543843	0.381	0.286	7.92582645586701e-28	JZP 2	Psip1
1424	Fubp31	9.37117807700829e-32	0.336573284199641	0.441	0.349	2.01602153970679e-27	JZP 2	Fubp3
1425	Cep164	1.21924535685309e-31	0.311913421529444	0.455	0.36	2.62296253619805e-27	JZP 2	Cep164
1426	Taf1d	1.47338675147494e-31	0.295693201744219	0.484	0.383	3.16969691844803e-27	JZP 2	Taf1d
1427	Top2a	1.98931562102989e-31	0.270902138760061	0.354	0.241	4.27961469552161e-27	JZP 2	Top2a
1428	Memo1	2.10214050249075e-31	0.32404241339552	0.467	0.381	4.52233486300835e-27	JZP 2	Memo1
1429	Smc4	1.51093578513858e-30	0.315222340853491	0.361	0.26	3.25047615456862e-26	JZP 2	Smc4
1430	Tfap2c1	3.192804240802e-30	0.298876251088084	0.493	0.403	6.86867976323735e-26	JZP 2	Tfap2c
1431	Zdhhc81	3.61919739563573e-30	0.345457725666581	0.292	0.2	7.78597935723114e-26	JZP 2	Zdhhc8
1432	Prim2	4.06020231073267e-30	0.294179454349773	0.533	0.444	8.73471323107919e-26	JZP 2	Prim2
1433	Hs2st1	4.16828228031523e-30	0.306474076197766	0.538	0.45	8.96722566964214e-26	JZP 2	Hs2st1
1434	Als2cl	4.94533579008711e-30	0.324776015973147	0.294	0.2	1.06389008852144e-25	JZP 2	Als2cl
1435	Frk	5.33584484064784e-30	0.348004539989541	0.304	0.208	1.14790030056857e-25	JZP 2	Frk
1436	Serpinb9e1	7.03509091938535e-30	0.33590415740811	0.398	0.301	1.51345910948737e-25	JZP 2	Serpinb9e
1437	Zwilch	1.02624483661008e-29	0.295197522109049	0.267	0.171	2.20776051699927e-25	JZP 2	Zwilch
1438	Knl1	1.29080007916725e-29	0.303945988700474	0.284	0.185	2.7768982103125e-25	JZP 2	Knl1
1439	Ddhd11	2.92046421852768e-29	0.314988096913855	0.31	0.213	6.28279467331859e-25	JZP 2	Ddhd1
1440	Sparc1	3.58044990474325e-29	0.345078044872307	0.302	0.211	7.70262188007415e-25	JZP 2	Sparc
1441	Slc10a7	6.27404738396337e-29	0.269771151061003	0.612	0.546	1.34973581371204e-24	JZP 2	Slc10a7
1442	Ksr1	7.48158096221829e-29	0.316765548259221	0.291	0.195	1.60951251240202e-24	JZP 2	Ksr1
1443	Tram2	8.99783216476625e-29	0.317562281115269	0.387	0.292	1.93570363360616e-24	JZP 2	Tram2
1444	Msi21	1.25616281224986e-28	0.277991189437524	0.731	0.678	2.70238305799313e-24	JZP 2	Msi2
1445	Atad2	1.75915851839482e-28	0.319775001531725	0.323	0.228	3.78447772062277e-24	JZP 2	Atad2
1446	Igf2bp3	3.18315306186612e-28	0.290116380469831	0.542	0.454	6.84791718199259e-24	JZP 2	Igf2bp3
1447	Cecr2	6.39078467431673e-28	0.336762336685121	0.404	0.311	1.37484950698576e-23	JZP 2	Cecr2
1448	Zcchc141	6.76110782821147e-28	0.331373341441425	0.454	0.37	1.45451712708313e-23	JZP 2	Zcchc14
1449	Rlim	7.04344473028625e-28	0.301674941338502	0.541	0.48	1.51525626482648e-23	JZP 2	Rlim
1450	Tbc1d81	1.19211314319941e-27	0.329300224184712	0.327	0.233	2.56459300496489e-23	JZP 2	Tbc1d8
1451	Kdm6b1	2.74239135101993e-27	0.314622410656612	0.339	0.246	5.89970651344917e-23	JZP 2	Kdm6b
1452	Arpc21	1.12505246119946e-26	0.283777305179036	0.604	0.563	2.4203253597784e-22	JZP 2	Arpc2
1453	Elf21	2.38131156065609e-26	0.2857842200873	0.506	0.431	5.12291556043946e-22	JZP 2	Elf2
1454	Phldb21	3.08189901568071e-26	0.265384754169718	0.516	0.428	6.63008935243391e-22	JZP 2	Phldb2
1455	Chdh	3.38292486414361e-26	0.307296868235181	0.256	0.172	7.27768626023215e-22	JZP 2	Chdh
1456	Actr21	3.75472845801189e-26	0.256577791284246	0.615	0.567	8.07754733172097e-22	JZP 2	Actr2
1457	Actr3	4.37872293099213e-26	0.27343363059466	0.533	0.468	9.41994664144336e-22	JZP 2	Actr3
1458	Tmcc32	8.07249185912862e-26	0.258360497403037	0.627	0.55	1.73663517365434e-21	JZP 2	Tmcc3
1459	Kif2a1	8.78258782792067e-26	0.331830115109453	0.425	0.345	1.88939811942057e-21	JZP 2	Kif2a
1460	Mast2	1.15655950280638e-25	0.282173262146203	0.48	0.403	2.48810645838737e-21	JZP 2	Mast2
1461	Topbp1	1.30780625609502e-25	0.29054155069202	0.383	0.29	2.81348359873721e-21	JZP 2	Topbp1
1462	Tmem1311	1.37976627851916e-25	0.298220721148984	0.373	0.285	2.96829119497828e-21	JZP 2	Tmem131
1463	Arhgap211	3.26294673557665e-25	0.27219728184249	0.571	0.512	7.01957731224604e-21	JZP 2	Arhgap21
1464	Mpp6	3.5536713175824e-25	0.297568635593258	0.335	0.246	7.64501310551502e-21	JZP 2	Mpp6
1465	Tmeff11	4.47658952325922e-25	0.284125614441753	0.474	0.392	9.63048704138757e-21	JZP 2	Tmeff1
1466	Taf1	6.76460597087173e-25	0.283694240792554	0.509	0.44	1.45526968251364e-20	JZP 2	Taf1
1467	Lyn	2.79631421287937e-24	0.300124744172971	0.426	0.346	6.01571076616739e-20	JZP 2	Lyn
1468	Bcat1	6.22196491723474e-24	0.26743017547799	0.392	0.293	1.33853131264471e-19	JZP 2	Bcat1
1469	Cep128	8.87980228992933e-24	0.272604186989217	0.365	0.269	1.9103118666325e-19	JZP 2	Cep128
1470	Pkm	3.33887862526081e-23	0.274272024262341	0.448	0.377	7.18292958652357e-19	JZP 2	Pkm
1471	Phip	5.78210261976517e-23	0.257271131214742	0.506	0.436	1.24390373659008e-18	JZP 2	Phip
1472	H2afz	8.95353895714948e-23	0.283299217950578	0.265	0.185	1.92617483585157e-18	JZP 2	H2afz
1473	Cbfb	1.22846554221394e-22	0.281053473306601	0.312	0.229	2.64279792096485e-18	JZP 2	Cbfb
1474	H3f3b	1.71121239225261e-22	0.309318789746339	0.359	0.286	3.68133121945303e-18	JZP 2	H3f3b
1475	Cnot6l	7.71363553582278e-22	0.262412145107864	0.419	0.343	1.65943441282155e-17	JZP 2	Cnot6l
1476	E130308A19Rik	8.97086749693393e-22	0.29649530274164	0.361	0.285	1.9299027246154e-17	JZP 2	E130308A19Rik
1477	Ippk	1.20888228719063e-21	0.289074954429112	0.412	0.339	2.6006684644332e-17	JZP 2	Ippk
1478	Egln11	3.83604977301305e-21	0.318851179043922	0.276	0.2	8.25249387668297e-17	JZP 2	Egln1
1479	Errfi1	5.6550336444854e-21	0.333071945980503	0.337	0.264	1.21656738793814e-16	JZP 2	Errfi1
1480	Sept11	8.30149702794581e-21	0.294185264614987	0.487	0.423	1.78590105562198e-16	JZP 2	Sept11
1481	Kctd17	9.28999128630419e-21	0.294703279676794	0.293	0.219	1.99855582542262e-16	JZP 2	Kctd17
1482	Vps50	1.06716773360214e-20	0.29502200337196	0.327	0.254	2.29579794529828e-16	JZP 2	Vps50
1483	Ppard1	1.38590057613919e-20	0.287064261011253	0.45	0.377	2.98148790944824e-16	JZP 2	Ppard
1484	Uck2	1.91619432496635e-20	0.288826527708038	0.355	0.273	4.1223088513001e-16	JZP 2	Uck2
1485	Pnn	1.34077061770368e-19	0.278341420839073	0.387	0.321	2.88439982986592e-15	JZP 2	Pnn
1486	Rbbp8	2.39101799095181e-19	0.309822909618695	0.329	0.258	5.14379700393462e-15	JZP 2	Rbbp8
1487	Stag3	2.76282773618207e-19	0.296617188654706	0.275	0.204	5.94367130884849e-15	JZP 2	Stag3
1488	Pld11	3.28489283216036e-19	0.259540483099619	0.392	0.322	7.06678994982657e-15	JZP 2	Pld1
1489	Ythdf3	3.42027906300304e-19	0.26345699948819	0.488	0.438	7.35804634823844e-15	JZP 2	Ythdf3
1490	Elk31	5.02223051487459e-19	0.302549071974699	0.266	0.195	1.08043245066497e-14	JZP 2	Elk3
1491	S100a61	1.76163094741661e-18	0.253606300863095	0.318	0.244	3.78979665717736e-14	JZP 2	S100a6
1492	Cbx5	2.29526909745996e-18	0.259777929171992	0.382	0.309	4.93781240936561e-14	JZP 2	Cbx5
1493	Ppp1r12c	6.44826601032323e-18	0.26180941305423	0.348	0.281	1.38721546680084e-13	JZP 2	Ppp1r12c
1494	Naa161	9.86252252013841e-18	0.253890585499393	0.406	0.342	2.12172446975738e-13	JZP 2	Naa16
1495	Rcc1	1.53361193023659e-17	0.271398961460464	0.356	0.29	3.29925934551798e-13	JZP 2	Rcc1
1496	Anapc51	1.79877353118748e-17	0.264408960193828	0.375	0.313	3.86970149764363e-13	JZP 2	Anapc5
1497	Hip1r	3.32511203438622e-17	0.305791135372301	0.309	0.246	7.15331351957507e-13	JZP 2	Hip1r
1498	Vstm41	4.36679702641544e-17	0.290880907725648	0.297	0.228	9.39429044292755e-13	JZP 2	Vstm4
1499	Sri1	5.24839896374273e-17	0.269068954970117	0.362	0.296	1.12908806906997e-12	JZP 2	Sri
1500	Papd5	5.66039101441897e-17	0.267034829149709	0.395	0.329	1.21771991893195e-12	JZP 2	Papd5
1501	Carm1	5.75778493048115e-17	0.261720273899722	0.445	0.393	1.23867227209441e-12	JZP 2	Carm1
1502	Kpnb1	9.38146107885223e-17	0.273013257199132	0.266	0.2	2.01823372189348e-12	JZP 2	Kpnb1
1503	Micall11	1.13083050675765e-16	0.259013676903565	0.318	0.25	2.43275566918773e-12	JZP 2	Micall1
1504	Pstpip11	5.4579042207295e-16	0.260722731035277	0.327	0.263	1.17415893500554e-11	JZP 2	Pstpip1
1505	Lrrc4	1.00419734825674e-15	0.292668850427694	0.335	0.276	2.16032975530473e-11	JZP 2	Lrrc4
1506	Clock	1.21824933779805e-15	0.269391619925644	0.357	0.298	2.62081980040495e-11	JZP 2	Clock
1507	Rpl41	1.51853362062458e-15	0.255439593816049	0.342	0.28	3.26682137804966e-11	JZP 2	Rpl41
1508	Pbx11	7.34560757344094e-06	0.26470165740229	0.279	0.252	0.158026055727435	JZP 2	Pbx1
1509	Pvt11	0	1.35766881328785	0.866	0.324	0	JZP 1	Pvt1
1510	Satb1	0	1.24921511181463	0.659	0.187	0	JZP 1	Satb1
1511	Sdk21	0	1.21189842694064	0.838	0.311	0	JZP 1	Sdk2
1512	Phactr3	0	1.17585001609426	0.421	0.073	0	JZP 1	Phactr3
1513	Cdh4	0	1.05504835125855	0.557	0.174	0	JZP 1	Cdh4
1514	Pou2f3	0	0.992689940229506	0.449	0.101	0	JZP 1	Pou2f3
1515	Nr6a1	1.32094754488801e-260	0.854001165197459	0.88	0.67	2.84175445331758e-256	JZP 1	Nr6a1
1516	Fmn2	9.02939022211946e-251	0.736042058036386	0.266	0.046	1.94249271848456e-246	JZP 1	Fmn2
1517	Nav31	1.85661396290388e-217	0.829517806885311	0.656	0.325	3.99413361839511e-213	JZP 1	Nav3
1518	Mpzl12	2.85521485711628e-214	0.734532588271595	0.832	0.596	6.14242372211425e-210	JZP 1	Mpzl1
1519	E2f31	6.93527829809498e-214	0.822020157610681	0.742	0.435	1.49198642026917e-209	JZP 1	E2f3
1520	Hmga2	1.64539322463332e-211	0.877053335001532	0.383	0.109	3.53973444415366e-207	JZP 1	Hmga2
1521	Gm4117	4.32716694746916e-206	0.826470489513561	0.292	0.067	9.30903425409041e-202	JZP 1	Gm4117
1522	Trio2	1.06028387566861e-204	0.607485004975353	0.94	0.753	2.28098870172587e-200	JZP 1	Trio
1523	Gm472831	1.41457521501373e-194	0.456420187050129	0.99	0.946	3.04317566005904e-190	JZP 1	Gm47283
1524	Wnk2	4.1019543202509e-187	0.807468531301384	0.563	0.253	8.82453432915577e-183	JZP 1	Wnk2
1525	Gm26917	4.38895858712824e-186	0.437854659003046	1	0.987	9.44196660848899e-182	JZP 1	Gm26917
1526	Plac12	2.26076238005556e-185	0.685840040582042	0.808	0.51	4.86357810821353e-181	JZP 1	Plac1
1527	Prune22	3.69888631712793e-182	0.556306502469567	0.91	0.597	7.95741413403731e-178	JZP 1	Prune2
1528	Cmss11	8.02403741212928e-181	0.473965904393634	0.972	0.891	1.72621116847137e-176	JZP 1	Cmss1
1529	Pip4k2a1	3.63613446405226e-180	0.796544820748095	0.568	0.266	7.82241607251563e-176	JZP 1	Pip4k2a
1530	Diaph3	9.74190644190309e-180	0.65619260196528	0.735	0.404	2.09577633284661e-175	JZP 1	Diaph3
1531	Mthfd1l1	1.50136224219206e-171	0.727505177883509	0.647	0.341	3.22988059162777e-167	JZP 1	Mthfd1l
1532	Auts21	1.47902343829746e-169	0.525774356737251	0.958	0.863	3.18182312280932e-165	JZP 1	Auts2
1533	Cep1281	3.31320432285605e-157	0.69568121147294	0.541	0.255	7.12769645976023e-153	JZP 1	Cep128
1534	Gphn	1.01771618766685e-146	0.556733654277136	0.864	0.717	2.1894128345277e-142	JZP 1	Gphn
1535	Srgap22	3.77354536040715e-146	0.546055810070347	0.839	0.615	8.11802813384391e-142	JZP 1	Srgap2
1536	Gm383992	2.82911462907438e-145	0.657780826901712	0.631	0.343	6.08627430152772e-141	JZP 1	Gm38399
1537	Tspan181	8.03604390949341e-141	0.697667502249996	0.382	0.143	1.72879412624932e-136	JZP 1	Tspan18
1538	Pola1	1.97629252103866e-140	0.695105032329465	0.502	0.233	4.25159810051046e-136	JZP 1	Pola1
1539	Pdzrn31	1.19604425668439e-139	0.723326022616151	0.552	0.276	2.57305000940513e-135	JZP 1	Pdzrn3
1540	Lrrc8c1	3.34994352553404e-139	0.656635938012539	0.623	0.345	7.20673350648138e-135	JZP 1	Lrrc8c
1541	Mid11	1.27375975578759e-135	0.570256847987127	0.783	0.557	2.74023936262585e-131	JZP 1	Mid1
1542	Gm42418	7.70478484187221e-135	0.309646438923336	1	1	1.65753036303197e-130	JZP 1	Gm42418
1543	Top2a1	2.18006774824303e-130	0.609252098520224	0.497	0.23	4.68997974679523e-126	JZP 1	Top2a
1544	Tcf20	7.61623011945809e-129	0.368625125824283	0.973	0.913	1.63847958559902e-124	JZP 1	Tcf20
1545	Rtn11	8.11550160902492e-126	0.556095113184349	0.787	0.563	1.74588786114953e-121	JZP 1	Rtn1
1546	Elf4	3.7991001012485e-125	0.654019885602182	0.491	0.236	8.17300404781591e-121	JZP 1	Elf4
1547	Gab2	2.50729299178545e-120	0.422833097244077	0.943	0.849	5.39393941322804e-116	JZP 1	Gab2
1548	Dlc11	1.06779886329542e-119	0.62798908098925	0.771	0.608	2.29715569460744e-115	JZP 1	Dlc1
1549	A630089N07Rik	5.13559085721153e-118	0.625673205192252	0.459	0.219	1.10481966111192e-113	JZP 1	A630089N07Rik
1550	Sgpp22	6.7924287633977e-118	0.651614399265319	0.578	0.327	1.46125519986975e-113	JZP 1	Sgpp2
1551	Uck21	2.03771972555626e-117	0.641482733486124	0.51	0.26	4.38374644558919e-113	JZP 1	Uck2
1552	Cenpp	3.36964941182944e-117	0.613171321020482	0.579	0.326	7.24912677966868e-113	JZP 1	Cenpp
1553	Sfmbt2	4.7487906809274e-116	0.352385633069023	0.978	0.942	1.02160733918791e-111	JZP 1	Sfmbt2
1554	Large11	9.23992571231828e-113	0.667780255814842	0.654	0.444	1.98778521849103e-108	JZP 1	Large1
1555	Ptprg	8.00961315667365e-111	0.620930061101034	0.532	0.291	1.7231080783952e-106	JZP 1	Ptprg
1556	Mcph11	1.38099797891862e-110	0.525058979304703	0.682	0.437	2.97094095204762e-106	JZP 1	Mcph1
1557	Gm28285	1.69195605354419e-110	0.566234301225666	0.374	0.157	3.63990505798962e-106	JZP 1	Gm28285
1558	Itga91	1.38975469698593e-109	0.629686063740101	0.428	0.2	2.98977927962584e-105	JZP 1	Itga9
1559	Mki671	4.80224893438749e-108	0.555692403960856	0.466	0.227	1.03310781325478e-103	JZP 1	Mki67
1560	Chsy11	1.7193439820491e-104	0.558284864494655	0.59	0.351	3.69882470858224e-100	JZP 1	Chsy1
1561	Ebf2	4.46999286546228e-103	0.625987240183328	0.252	0.086	9.61629565146899e-99	JZP 1	Ebf2
1562	Cdc14a1	8.79558799480943e-102	0.564319052029066	0.368	0.161	1.89219484532335e-97	JZP 1	Cdc14a
1563	Wscd2	1.56543635730581e-101	0.597003906052453	0.267	0.096	3.36772323547199e-97	JZP 1	Wscd2
1564	Prkch	2.52898125521258e-99	0.354961766329913	0.752	0.515	5.44059737433883e-95	JZP 1	Prkch
1565	Tmem131l	4.59793269005905e-98	0.633005675880173	0.435	0.224	9.89153259612403e-94	JZP 1	Tmem131l
1566	Cgnl11	1.80367910073571e-96	0.475022907603252	0.78	0.588	3.88025484941274e-92	JZP 1	Cgnl1
1567	Ncl	7.72522115240734e-95	0.556520373691386	0.53	0.31	1.66192682651739e-90	JZP 1	Ncl
1568	Pip5k1b1	9.046859213671e-94	0.704773178973706	0.477	0.269	1.94625082263704e-89	JZP 1	Pip5k1b
1569	Mdn1	1.75737215417131e-93	0.55756229348543	0.562	0.361	3.78063471526874e-89	JZP 1	Mdn1
1570	Blm	8.8950540190363e-93	0.560531417654967	0.403	0.195	1.91359297111528e-88	JZP 1	Blm
1571	Mms22l	6.58229612528397e-92	0.538966384056104	0.429	0.216	1.41604936543234e-87	JZP 1	Mms22l
1572	Nsd21	8.12836585306549e-92	0.517266147526881	0.704	0.534	1.74865534596998e-87	JZP 1	Nsd2
1573	Spata5	3.04257888262845e-91	0.532139513898463	0.629	0.435	6.54549995019858e-87	JZP 1	Spata5
1574	Fat11	6.52279013219474e-90	0.55976056279991	0.584	0.375	1.40324784113905e-85	JZP 1	Fat1
1575	Rad51b1	1.07101058997917e-89	0.529293138982701	0.701	0.508	2.30406508222219e-85	JZP 1	Rad51b
1576	Senp1	1.77238216257622e-88	0.544129221378915	0.571	0.375	3.81292574635023e-84	JZP 1	Senp1
1577	Arid5b2	1.27437040762706e-87	0.35011138274411	0.951	0.851	2.74155305792809e-83	JZP 1	Arid5b
1578	Nop56	3.95036603162414e-87	0.536158197329884	0.48	0.274	8.49842244383302e-83	JZP 1	Nop56
1579	Med14	1.29130587547844e-85	0.549166901927521	0.417	0.217	2.77798632991676e-81	JZP 1	Med14
1580	Lyn1	6.65281216582429e-85	0.58288621432595	0.533	0.338	1.43121948123378e-80	JZP 1	Lyn
1581	Smoc11	9.34216537586413e-85	0.51894029267194	0.614	0.413	2.00978003730965e-80	JZP 1	Smoc1
1582	Mthfd1	2.10457824336902e-84	0.531088237692881	0.338	0.153	4.52757917495978e-80	JZP 1	Mthfd1
1583	Xist	4.61558800173986e-83	0.417283635589845	0.722	0.436	9.92951446814296e-79	JZP 1	Xist
1584	Hs2st11	5.31904543761731e-83	0.548675893137464	0.631	0.443	1.14428624499461e-78	JZP 1	Hs2st1
1585	Prim21	3.7662895422449e-82	0.522370500765746	0.621	0.438	8.10241869223144e-78	JZP 1	Prim2
1586	Kif15	9.08961670488358e-80	0.455183691584211	0.337	0.152	1.9554492417216e-75	JZP 1	Kif15
1587	Hpcal12	4.27638211849212e-79	0.470140103415533	0.601	0.392	9.19978085151211e-75	JZP 1	Hpcal1
1588	Nasp	5.63626198397375e-78	0.518327024222909	0.38	0.192	1.21252904061227e-73	JZP 1	Nasp
1589	Dtl	1.76093512425285e-77	0.479336309102357	0.264	0.107	3.78829973280515e-73	JZP 1	Dtl
1590	Rfx7	3.17868391721653e-76	0.515460936596854	0.577	0.396	6.83830271110793e-72	JZP 1	Rfx7
1591	Etl4	4.95875393074519e-76	0.285222646916134	0.975	0.924	1.06677673312121e-71	JZP 1	Etl4
1592	Kif11	2.94617207266144e-74	0.45719619833038	0.338	0.16	6.33809997991656e-70	JZP 1	Kif11
1593	Knl11	7.3250190777106e-74	0.483415670033977	0.364	0.18	1.57583135418788e-69	JZP 1	Knl1
1594	Pkp4	1.51693833694361e-73	0.505854237614089	0.577	0.39	3.2633894442668e-69	JZP 1	Pkp4
1595	Ppp2r2c2	2.40515839992102e-72	0.40765634612307	0.613	0.376	5.17421726575008e-68	JZP 1	Ppp2r2c
1596	Taf1d1	4.50484419678133e-71	0.496342066716244	0.556	0.379	9.69127132053567e-67	JZP 1	Taf1d
1597	Ankrd28	1.14550433518503e-70	0.486026183530841	0.594	0.431	2.46432347628356e-66	JZP 1	Ankrd28
1598	Vav21	6.78179194161814e-70	0.44765389994508	0.604	0.418	1.45896690040031e-65	JZP 1	Vav2
1599	Myo18a1	1.28084207044167e-69	0.388230434974622	0.821	0.693	2.75547554614116e-65	JZP 1	Myo18a
1600	Cfdp1	1.71360744756891e-69	0.433623067880062	0.697	0.565	3.686483701955e-65	JZP 1	Cfdp1
1601	Topbp11	1.23731265267978e-68	0.498181566340579	0.467	0.285	2.66183070971001e-64	JZP 1	Topbp1
1602	Cit1	1.25577782448159e-68	0.464269651110488	0.331	0.161	2.70155483380725e-64	JZP 1	Cit
1603	Cenpe	5.49337510703495e-68	0.490303549540559	0.322	0.157	1.18178978677643e-63	JZP 1	Cenpe
1604	Hat1	6.54945936809888e-68	0.494512797792733	0.486	0.302	1.40898519385911e-63	JZP 1	Hat1
1605	Cenph	5.28088362701423e-67	0.45507517282168	0.265	0.115	1.13607649467957e-62	JZP 1	Cenph
1606	Slc10a71	7.29788586899449e-66	0.435208458286467	0.678	0.542	1.56999418699678e-61	JZP 1	Slc10a7
1607	Ksr11	1.06527360065613e-65	0.466551356339916	0.364	0.191	2.29172309709153e-61	JZP 1	Ksr1
1608	G3bp11	3.39330035983512e-65	0.465925265609782	0.552	0.385	7.3000070641133e-61	JZP 1	G3bp1
1609	Grip1	4.29135608652666e-65	0.46720961827824	0.348	0.175	9.23199434894481e-61	JZP 1	Grip1
1610	Memo11	4.62726179621856e-65	0.5107937475079	0.532	0.377	9.95462830220499e-61	JZP 1	Memo1
1611	Adgrl12	7.27410980007997e-65	0.486602361328146	0.315	0.156	1.5648792412912e-60	JZP 1	Adgrl1
1612	Wdr43	1.18636391492018e-64	0.462656004137012	0.445	0.27	2.55222469016778e-60	JZP 1	Wdr43
1613	Cenpf	2.31376917102337e-64	0.43220284721789	0.301	0.141	4.97761161762257e-60	JZP 1	Cenpf
1614	Incenp	9.03792728473803e-64	0.417634818527597	0.29	0.136	1.94432929676569e-59	JZP 1	Incenp
1615	Phtf2	9.22985132697239e-63	0.486062818203676	0.351	0.191	1.98561791597157e-58	JZP 1	Phtf2
1616	Nop58	1.02216599960761e-62	0.487845154134395	0.421	0.254	2.19898571495584e-58	JZP 1	Nop58
1617	Tpx2	5.09862955890974e-62	0.446735031279079	0.299	0.145	1.09686817700825e-57	JZP 1	Tpx2
1618	Ssh2	6.28720028250734e-62	0.490186527962085	0.528	0.373	1.3525653967758e-57	JZP 1	Ssh2
1619	Fam168a2	7.77601345816759e-62	0.287825034739146	0.857	0.708	1.67285377525559e-57	JZP 1	Fam168a
1620	Polq	6.35753680654326e-61	0.467015985950435	0.288	0.14	1.36769689319165e-56	JZP 1	Polq
1621	Hells1	2.17347527313069e-60	0.453066250756731	0.342	0.18	4.67579735508605e-56	JZP 1	Hells
1622	Nav12	6.47483447499043e-60	0.300146650505483	0.723	0.545	1.39293114060469e-55	JZP 1	Nav1
1623	Gfod12	9.24657586640331e-60	0.381899947235691	0.638	0.44	1.98921586613935e-55	JZP 1	Gfod1
1624	Drosha	1.40323205158056e-59	0.47461677249491	0.472	0.311	3.01877311256525e-55	JZP 1	Drosha
1625	Ndufaf2	1.63145478663031e-58	0.468895774345638	0.353	0.193	3.50974868247779e-54	JZP 1	Ndufaf2
1626	Xpo11	2.60448490006493e-58	0.380262556775777	0.692	0.565	5.60302836550968e-54	JZP 1	Xpo1
1627	Atad21	3.42823902600986e-58	0.447052325690708	0.392	0.224	7.37517061665501e-54	JZP 1	Atad2
1628	Peak1	5.77937621043712e-58	0.27281833125479	0.882	0.788	1.24331720415134e-53	JZP 1	Peak1
1629	Pacs1	1.71743486751316e-57	0.427764649390991	0.672	0.548	3.69471763048107e-53	JZP 1	Pacs1
1630	Noc2l	7.44024702627139e-57	0.449111911696907	0.371	0.212	1.60062034276176e-52	JZP 1	Noc2l
1631	Snx5	2.11840910451562e-56	0.441344448681241	0.505	0.349	4.55733350654446e-52	JZP 1	Snx5
1632	Anp32b	2.86984636725914e-56	0.462385222157444	0.48	0.324	6.17390048988459e-52	JZP 1	Anp32b
1633	Tcf12	3.8099216852356e-56	0.263922611221703	0.881	0.822	8.19628452144734e-52	JZP 1	Tcf12
1634	Kif20b	4.75533428263934e-56	0.410003516860687	0.31	0.159	1.0230150642242e-51	JZP 1	Kif20b
1635	Pds5b	1.41642399444706e-55	0.437958328674448	0.44	0.278	3.04715293925397e-51	JZP 1	Pds5b
1636	Wdhd1	1.86500833444037e-54	0.429917859412944	0.293	0.149	4.01219242988157e-50	JZP 1	Wdhd1
1637	Spidr	6.35511997043383e-54	0.476171826334486	0.424	0.269	1.36717695923943e-49	JZP 1	Spidr
1638	Palm2	8.03258689878908e-54	0.398613676567796	0.54	0.369	1.7280504195365e-49	JZP 1	Palm
1639	Ldlrad3	8.15946502355633e-54	0.452834890952742	0.331	0.18	1.75534571051767e-49	JZP 1	Ldlrad3
1640	Zfp641	2.45836052889696e-53	0.437894880991552	0.556	0.415	5.28867100581602e-49	JZP 1	Zfp64
1641	Sh3bgrl	5.88783978840764e-53	0.445181892246618	0.251	0.12	1.26665097368014e-48	JZP 1	Sh3bgrl
1642	Pfas	9.80601670370546e-53	0.402171330599391	0.263	0.128	2.10956837346816e-48	JZP 1	Pfas
1643	Smarcc1	6.68665672162686e-52	0.414650475911995	0.57	0.436	1.43850046052359e-47	JZP 1	Smarcc1
1644	Mpp61	7.64451889114679e-52	0.433384141337281	0.399	0.242	1.64456534905241e-47	JZP 1	Mpp6
1645	Cdca2	7.92173877013063e-52	0.400376551038747	0.259	0.125	1.7042036616182e-47	JZP 1	Cdca2
1646	Usp9x	8.93033440109159e-52	0.320518203124865	0.805	0.752	1.92118283970683e-47	JZP 1	Usp9x
1647	Pcx	2.14202804188137e-51	0.475062505960398	0.305	0.165	4.6081449264994e-47	JZP 1	Pcx
1648	Cdyl1	2.19053454133913e-51	0.356815971620094	0.696	0.582	4.71249695878287e-47	JZP 1	Cdyl
1649	Thada	2.40401912266136e-51	0.410901590350547	0.605	0.476	5.17176633858139e-47	JZP 1	Thada
1650	Papd51	5.67240716670802e-51	0.442736080923348	0.472	0.324	1.2203049537739e-46	JZP 1	Papd5
1651	Naa25	1.11990770171991e-50	0.41894802601244	0.394	0.242	2.40925743871004e-46	JZP 1	Naa25
1652	Adk	1.27347668972654e-50	0.465364089818063	0.546	0.408	2.73963040260871e-46	JZP 1	Adk
1653	Npm1	1.73881418034549e-50	0.415654384421547	0.448	0.293	3.74071094617725e-46	JZP 1	Npm1
1654	Shroom4	2.1459760819577e-50	0.270783330584766	0.829	0.733	4.6166383451156e-46	JZP 1	Shroom4
1655	Actn12	1.21120885400752e-49	0.324668420030835	0.68	0.506	2.60567360762637e-45	JZP 1	Actn1
1656	Lmnb1	1.52772836969713e-49	0.407482874437694	0.475	0.316	3.28660204172943e-45	JZP 1	Lmnb1
1657	Ddx21	5.2003057899127e-49	0.373901190434004	0.262	0.131	1.11874178458392e-44	JZP 1	Ddx21
1658	Cbx51	6.85867012093061e-49	0.405403331284724	0.456	0.304	1.4755057031158e-44	JZP 1	Cbx5
1659	Zfp462	7.30456197901923e-49	0.359783432972836	0.373	0.215	1.57143041854641e-44	JZP 1	Zfp462
1660	Klhl131	1.03090038537258e-48	0.392846822873925	0.804	0.717	2.21777599905203e-44	JZP 1	Klhl13
1661	Smc41	2.01473575802569e-48	0.407848347955972	0.41	0.258	4.33430103624066e-44	JZP 1	Smc4
1662	Gnl3	2.47278377438017e-48	0.409701651487074	0.347	0.202	5.31969973382406e-44	JZP 1	Gnl3
1663	Tango6	2.81425707627168e-48	0.413942031194064	0.343	0.196	6.05431124818327e-44	JZP 1	Tango6
1664	Hsp90ab1	2.9367139830133e-48	0.39877611486242	0.522	0.372	6.3177527916565e-44	JZP 1	Hsp90ab1
1665	Mcc2	1.0052717239511e-47	0.462518341632507	0.297	0.161	2.16264105973601e-43	JZP 1	Mcc
1666	Anln	1.2837761253484e-47	0.37326628270569	0.268	0.136	2.76178757846202e-43	JZP 1	Anln
1667	Snx25	2.30824016893889e-47	0.432388528678185	0.271	0.141	4.96571707543824e-43	JZP 1	Snx25
1668	AY036118	2.40283375492563e-47	0.358784203665821	0.631	0.486	5.16921625697151e-43	JZP 1	AY036118
1669	Rif1	3.05135870715957e-47	0.389650707472251	0.467	0.316	6.56438798671238e-43	JZP 1	Rif1
1670	Smc2	4.72019803102729e-47	0.399538200951084	0.256	0.129	1.0154562024149e-42	JZP 1	Smc2
1671	Smad7	5.69082247794325e-47	0.439173931013945	0.513	0.378	1.22426663967993e-42	JZP 1	Smad7
1672	Hjurp1	8.731775794561e-47	0.386499138848117	0.472	0.322	1.87846692668391e-42	JZP 1	Hjurp
1673	Rcc11	3.97954205161205e-46	0.412662423003396	0.428	0.284	8.56118881563301e-42	JZP 1	Rcc1
1674	Tfdp1	4.84970214062938e-46	0.426141986762409	0.509	0.377	1.0433164215136e-41	JZP 1	Tfdp1
1675	3110082I17Rik	1.02620982662764e-45	0.414092340472826	0.316	0.177	2.20768520002404e-41	JZP 1	3110082I17Rik
1676	Arih1	1.20679503667222e-45	0.314562688622172	0.737	0.671	2.59617816239294e-41	JZP 1	Arih1
1677	Utp20	2.29157154678706e-44	0.425931579760229	0.331	0.196	4.92985786860301e-40	JZP 1	Utp20
1678	Cdkal1	2.55310962434219e-44	0.35460387627265	0.681	0.603	5.49250473484735e-40	JZP 1	Cdkal1
1679	Tyms	2.58128092657198e-44	0.387683001818107	0.252	0.129	5.5531096573343e-40	JZP 1	Tyms
1680	Piezo22	1.08733970576626e-43	0.381100138189088	0.433	0.273	2.33919390901495e-39	JZP 1	Piezo2
1681	Mat2a	1.79937797182206e-43	0.409098992840598	0.358	0.22	3.87100183078081e-39	JZP 1	Mat2a
1682	Clstn2	5.62194344915635e-43	0.376040619080441	0.261	0.136	1.209448694217e-38	JZP 1	Clstn2
1683	Rfc1	3.69155647951225e-42	0.401318521791086	0.342	0.21	7.9416454543747e-38	JZP 1	Rfc1
1684	Cbfb1	4.73911655823328e-42	0.402393748656763	0.362	0.226	1.01952614517273e-37	JZP 1	Cbfb
1685	Ftx	5.17534231481984e-42	0.375075400379228	0.51	0.38	1.11337139218719e-37	JZP 1	Ftx
1686	Brca1	9.03711291495239e-42	0.392904625332247	0.299	0.169	1.94415410139371e-37	JZP 1	Brca1
1687	Ehmt1	8.83475358084305e-41	0.356877951697465	0.646	0.562	1.90062053784676e-36	JZP 1	Ehmt1
1688	Acaca	9.4305029657953e-41	0.389464987363337	0.448	0.309	2.02878410303154e-36	JZP 1	Acaca
1689	Snrnp48	1.59790151282813e-40	0.41410167583068	0.433	0.307	3.43756552454715e-36	JZP 1	Snrnp48
1690	Tipin	1.9927803269454e-40	0.390554843510019	0.288	0.163	4.28706831735765e-36	JZP 1	Tipin
1691	Pde4dip2	3.62662656633269e-40	0.259938228582349	0.732	0.584	7.80196173215152e-36	JZP 1	Pde4dip
1692	Igf2bp31	4.17243728891687e-40	0.409761337870232	0.565	0.454	8.97616433964686e-36	JZP 1	Igf2bp3
1693	Caprin1	4.26568691804443e-40	0.344688738612936	0.648	0.565	9.17677226678899e-36	JZP 1	Caprin1
1694	Gtf2f2	5.30230151794314e-40	0.394436155878686	0.456	0.332	1.14068412555511e-35	JZP 1	Gtf2f2
1695	Pwwp2a	6.84720646330809e-40	0.404269279629095	0.461	0.336	1.47303952645147e-35	JZP 1	Pwwp2a
1696	Tmem164	7.22002365919863e-40	0.350201988812703	0.656	0.547	1.5532436898034e-35	JZP 1	Tmem164
1697	Nrf1	7.442115509482e-40	0.351059827845783	0.581	0.467	1.60102230955486e-35	JZP 1	Nrf1
1698	Ipo11	8.46818382024329e-40	0.374855902447347	0.4	0.266	1.82176038524894e-35	JZP 1	Ipo11
1699	Stag31	9.52380749261353e-40	0.435417103347692	0.325	0.201	2.04885670588595e-35	JZP 1	Stag3
1700	Ddx31	2.95149246480321e-39	0.385784633457466	0.283	0.163	6.34954573953115e-35	JZP 1	Ddx31
1701	Akt3	6.11072468184042e-39	0.426008312658759	0.405	0.274	1.31460020080433e-34	JZP 1	Akt3
1702	Rasal2	7.60273501864455e-39	0.432224943365007	0.406	0.282	1.635576384561e-34	JZP 1	Rasal2
1703	Bzw2	9.60886209335104e-39	0.357237132110691	0.265	0.146	2.06715450214261e-34	JZP 1	Bzw2
1704	Ino80	1.04576123954164e-38	0.355500248257477	0.541	0.429	2.24974615462593e-34	JZP 1	Ino80
1705	Ncapd2	1.08327516618921e-38	0.371721326428439	0.256	0.139	2.33044986502285e-34	JZP 1	Ncapd2
1706	Simc1	1.69735196212077e-38	0.407127018404648	0.308	0.183	3.65151327611042e-34	JZP 1	Simc1
1707	Cep192	1.88088164132017e-38	0.384999886794102	0.444	0.314	4.04634067497209e-34	JZP 1	Cep192
1708	Rab8b2	2.37308537909355e-38	0.331756454106768	0.529	0.378	5.10521857604395e-34	JZP 1	Rab8b
1709	Prex22	3.38663420691596e-38	0.351487296780411	0.511	0.367	7.2856661693383e-34	JZP 1	Prex2
1710	Etv62	4.56401060440557e-38	0.403415338365934	0.753	0.697	9.81855601325771e-34	JZP 1	Etv6
1711	Zcchc7	4.78932330221029e-38	0.302106298079075	0.746	0.71	1.0303271220045e-33	JZP 1	Zcchc7
1712	Baz1a	4.9800837862591e-38	0.37384353667823	0.33	0.201	1.07136542493792e-33	JZP 1	Baz1a
1713	Gstcd	6.37148413453782e-38	0.360013259046824	0.308	0.183	1.37069738186312e-33	JZP 1	Gstcd
1714	Birc6	6.61445398484367e-38	0.270089333123593	0.8	0.771	1.42296748575942e-33	JZP 1	Birc6
1715	Immp2l	7.84329862609379e-38	0.411130391922609	0.579	0.483	1.68732883343156e-33	JZP 1	Immp2l
1716	Pdss1	8.00084405616753e-38	0.358384706159929	0.266	0.149	1.72122158180332e-33	JZP 1	Pdss1
1717	Fam83b2	9.46158679152813e-38	0.394257888349233	0.371	0.241	2.03547116646145e-33	JZP 1	Fam83b
1718	Rap1a2	1.01039213900528e-37	0.312494784473443	0.648	0.543	2.17365660864206e-33	JZP 1	Rap1a
1719	Atad5	1.12311167028361e-37	0.376525368239843	0.325	0.199	2.41615013628114e-33	JZP 1	Atad5
1720	Slc35d11	1.2906354101767e-37	0.384720295017277	0.297	0.176	2.77654395791313e-33	JZP 1	Slc35d1
1721	Sae1	2.75153795482305e-37	0.394511721537008	0.458	0.339	5.91938360221083e-33	JZP 1	Sae1
1722	Naa15	4.44670773569914e-37	0.343070971147271	0.536	0.421	9.56620235180956e-33	JZP 1	Naa15
1723	Larp1	5.04845902890872e-37	0.356991125290276	0.558	0.449	1.08607499088913e-32	JZP 1	Larp1
1724	Gm2381	1.0856779628447e-36	0.363447562995742	0.281	0.161	2.3356190014678e-32	JZP 1	Gm2381
1725	Arid2	1.18351192716639e-36	0.309172709132831	0.675	0.585	2.54608920891305e-32	JZP 1	Arid2
1726	Elovl52	1.34425936465553e-36	0.377398759254602	0.41	0.277	2.89190517118344e-32	JZP 1	Elovl5
1727	Ranbp17	1.90531749498082e-36	0.292206220884268	0.6	0.478	4.09890952695225e-32	JZP 1	Ranbp17
1728	Pds5a	3.31459853664988e-36	0.27991790737559	0.755	0.699	7.13069583189489e-32	JZP 1	Pds5a
1729	Rbfox2	1.06783733300647e-35	0.289395097064485	0.738	0.667	2.29723845449682e-31	JZP 1	Rbfox2
1730	Ipo5	1.50717279437396e-35	0.365027078841119	0.274	0.158	3.24238083253669e-31	JZP 1	Ipo5
1731	Eif2s3x	2.14783918570542e-35	0.386407688145972	0.319	0.199	4.62064644020807e-31	JZP 1	Eif2s3x
1732	Zwilch1	3.80315688587512e-35	0.347166861336434	0.29	0.171	8.18173140858315e-31	JZP 1	Zwilch
1733	Faf1	8.03492566832623e-35	0.273816449383547	0.717	0.653	1.72855355902702e-30	JZP 1	Faf1
1734	Xrcc5	9.31164383724921e-35	0.375358950851893	0.256	0.147	2.00321393870742e-30	JZP 1	Xrcc5
1735	Pprc1	9.46066328915389e-35	0.361036926187789	0.31	0.191	2.03527249339568e-30	JZP 1	Pprc1
1736	Dph6	1.04217538938646e-34	0.393909102824588	0.373	0.255	2.24203191518708e-30	JZP 1	Dph6
1737	Alkbh1	2.07611526787135e-34	0.360049852629064	0.38	0.261	4.46634677577163e-30	JZP 1	Alkbh1
1738	Kat6b	5.79160606009122e-34	0.301432653174944	0.723	0.677	1.24594821170742e-29	JZP 1	Kat6b
1739	Supt16	1.18871439853797e-33	0.364585307190358	0.404	0.282	2.55728128557473e-29	JZP 1	Supt16
1740	Slc25a13	1.91848646178099e-33	0.343342651134444	0.434	0.309	4.12723992522944e-29	JZP 1	Slc25a13
1741	Hmgn5	2.30814653881747e-33	0.361026933444514	0.27	0.159	4.96551564895802e-29	JZP 1	Hmgn5
1742	Mphosph9	3.48122798274321e-33	0.357918693332521	0.31	0.192	7.48916575927547e-29	JZP 1	Mphosph9
1743	AW554918	3.64612500014979e-33	0.346795304433225	0.519	0.415	7.84390871282223e-29	JZP 1	AW554918
1744	Ppan	5.21652658205584e-33	0.334966432083254	0.258	0.15	1.12223136359767e-28	JZP 1	Ppan
1745	Eif4g3	1.10674667317669e-32	0.30041689058277	0.633	0.533	2.38094411800502e-28	JZP 1	Eif4g3
1746	Adcy71	1.48865563593091e-32	0.265138402747716	0.687	0.541	3.20254486957817e-28	JZP 1	Adcy7
1747	Cmtm8	1.88148743482454e-32	0.347595472569338	0.322	0.201	4.04764391853804e-28	JZP 1	Cmtm8
1748	Raf12	3.46124453959211e-32	0.31974998846934	0.565	0.474	7.44617537802451e-28	JZP 1	Raf1
1749	Tmem57	3.61730597842105e-32	0.34040895301568	0.353	0.234	7.7819103513772e-28	JZP 1	Tmem57
1750	Ube2q2	4.34438552613664e-32	0.374743446055764	0.481	0.379	9.34607658237776e-28	JZP 1	Ube2q2
1751	Serbp1	4.40699077376504e-32	0.342809332989087	0.421	0.307	9.48075925160072e-28	JZP 1	Serbp1
1752	Mtdh	5.0371734405849e-32	0.354309986305033	0.526	0.433	1.08364712227303e-27	JZP 1	Mtdh
1753	Cnbp	5.09790410526118e-32	0.362604109571988	0.335	0.223	1.09671211016484e-27	JZP 1	Cnbp
1754	Txnrd1	5.37099761468004e-32	0.363724653182091	0.285	0.176	1.15546271684612e-27	JZP 1	Txnrd1
1755	Nup160	8.52108820399718e-32	0.347148743699558	0.372	0.256	1.83314170532591e-27	JZP 1	Nup160
1756	Notch2	1.72599756089565e-31	0.352049493589735	0.446	0.327	3.71313855275481e-27	JZP 1	Notch2
1757	Cul1	2.0820861752915e-31	0.31246073976433	0.632	0.56	4.47919198890461e-27	JZP 1	Cul1
1758	Mbnl1	2.14520654753307e-31	0.386789024304123	0.394	0.284	4.6149828457079e-27	JZP 1	Mbnl1
1759	Taf151	2.45137617822633e-31	0.27861411299768	0.69	0.629	5.2736455722183e-27	JZP 1	Taf15
1760	Pabpc1	2.68771424829534e-31	0.369246790344503	0.406	0.292	5.78207966235777e-27	JZP 1	Pabpc1
1761	Rptor	2.71248439679856e-31	0.263572629511449	0.703	0.645	5.83536768283273e-27	JZP 1	Rptor
1762	Taf11	2.94244370803101e-31	0.331376239648748	0.544	0.439	6.3300791490871e-27	JZP 1	Taf1
1763	Ubap2	3.08169566471294e-31	0.290831324145478	0.653	0.591	6.62965188349694e-27	JZP 1	Ubap2
1764	Celf2	3.76046739974111e-31	0.432500727883572	0.422	0.317	8.08989351706306e-27	JZP 1	Celf2
1765	Prmt7	6.03510169394735e-31	0.323885213789809	0.251	0.148	1.29833142741889e-26	JZP 1	Prmt7
1766	Gm26542	7.0685054799638e-31	0.310419113042209	0.452	0.32	1.52064758390461e-26	JZP 1	Gm26542
1767	Polr1a	7.37066545370924e-31	0.339523987390817	0.279	0.171	1.58565125905647e-26	JZP 1	Polr1a
1768	Ep400	1.15413205199649e-30	0.308049246050729	0.602	0.519	2.48288428346005e-26	JZP 1	Ep400
1769	Nipa2	2.17913318869766e-30	0.348900453216088	0.457	0.351	4.68796922884528e-26	JZP 1	Nipa2
1770	Lcorl	2.72634041376164e-30	0.375634311732028	0.297	0.19	5.86517613212541e-26	JZP 1	Lcorl
1771	Coro1c	2.88737281216267e-30	0.343684054003265	0.486	0.376	6.21160513080555e-26	JZP 1	Coro1c
1772	Rlim1	3.20127173233407e-30	0.315286433254216	0.563	0.48	6.88689587777029e-26	JZP 1	Rlim
1773	Alms1	3.62045814910679e-30	0.354300362478959	0.283	0.177	7.78869161617345e-26	JZP 1	Alms1
1774	Ezh21	5.11880462860874e-30	0.363651902927225	0.442	0.332	1.1012084397526e-25	JZP 1	Ezh2
1775	Nup93	5.35972475752984e-30	0.359809142032363	0.346	0.236	1.15303758708739e-25	JZP 1	Nup93
1776	Cep1641	1.13431529005737e-29	0.339720759152351	0.471	0.362	2.44025248350043e-25	JZP 1	Cep164
1777	Xpo4	1.52753822930286e-29	0.353981851290029	0.324	0.215	3.28619299269923e-25	JZP 1	Xpo4
1778	Taco11	1.58478239224108e-29	0.395656965675684	0.541	0.424	3.40934236042823e-25	JZP 1	Taco1
1779	Cep295	2.35319222341568e-29	0.341002526785718	0.323	0.212	5.06242243023415e-25	JZP 1	Cep295
1780	Fxr1	2.60220253778714e-29	0.304994441530335	0.519	0.425	5.59811831954148e-25	JZP 1	Fxr1
1781	Cct3	3.10911836410839e-29	0.332982339374022	0.335	0.227	6.68864633670637e-25	JZP 1	Cct3
1782	Cnot6l1	4.49692645603429e-29	0.335292381116025	0.448	0.342	9.67423788486656e-25	JZP 1	Cnot6l
1783	Nap1l1	4.7798689891402e-29	0.3521923226912	0.395	0.286	1.02829321563373e-24	JZP 1	Nap1l1
1784	Btaf1	4.85321250292662e-29	0.303145531348012	0.638	0.574	1.0440716057546e-24	JZP 1	Btaf1
1785	Got2	5.08866174023675e-29	0.359723202484624	0.36	0.252	1.09472380017713e-24	JZP 1	Got2
1786	Rpl411	5.70030886313598e-29	0.337056907696441	0.389	0.277	1.22630744572644e-24	JZP 1	Rpl41
1787	Lars2	1.11477177635219e-28	0.316117563913258	0.575	0.49	2.39820852246647e-24	JZP 1	Lars2
1788	Dock42	1.4402938934604e-28	0.370039807767555	0.394	0.28	3.09850425300136e-24	JZP 1	Dock4
1789	Sfxn1	1.95332551490342e-28	0.360397551981341	0.255	0.156	4.20218918021172e-24	JZP 1	Sfxn1
1790	Ybx1	2.63808344029116e-28	0.347307230489468	0.302	0.197	5.67530890509837e-24	JZP 1	Ybx1
1791	Ybx3	3.73871609714513e-28	0.340804508110125	0.338	0.231	8.04309993978833e-24	JZP 1	Ybx3
1792	Rapgef6	5.95317354178496e-28	0.322466323008741	0.523	0.432	1.2807062240442e-23	JZP 1	Rapgef6
1793	Pbx3	1.11348386095653e-27	0.381468686884311	0.297	0.195	2.39543783007578e-23	JZP 1	Pbx3
1794	Tmeff12	1.40162263708828e-27	0.316487296877688	0.496	0.392	3.01531077916801e-23	JZP 1	Tmeff1
1795	Utp14a	1.527228064982e-27	0.339572567430633	0.259	0.161	3.28552573619578e-23	JZP 1	Utp14a
1796	Lrpprc	1.74300391954282e-27	0.342544898703834	0.347	0.243	3.74972433211246e-23	JZP 1	Lrpprc
1797	Eif4e	2.41075448917259e-27	0.339239864333136	0.374	0.268	5.18625613255698e-23	JZP 1	Eif4e
1798	Prrc2c	2.45805643296537e-27	0.252033181276709	0.671	0.623	5.28801680423841e-23	JZP 1	Prrc2c
1799	Mettl16	2.51757602506957e-27	0.348657406571941	0.344	0.238	5.41606130273216e-23	JZP 1	Mettl16
1800	Rangap1	2.64511124067888e-27	0.32830200816901	0.377	0.27	5.69042781207248e-23	JZP 1	Rangap1
1801	Ttc27	3.83217806144759e-27	0.30316009377611	0.263	0.163	8.2441646635922e-23	JZP 1	Ttc27
1802	Chd4	7.2876337803139e-27	0.281946537236556	0.542	0.451	1.56778865515893e-22	JZP 1	Chd4
1803	Setdb1	7.72227480895796e-27	0.357154770233712	0.355	0.252	1.66129297965113e-22	JZP 1	Setdb1
1804	Cecr21	1.07002723970192e-26	0.339460786587917	0.418	0.312	2.30194960077075e-22	JZP 1	Cecr2
1805	Eif3a	1.28349222504153e-26	0.305810663177128	0.557	0.483	2.76117682373184e-22	JZP 1	Eif3a
1806	Hspa4	1.39686829134105e-26	0.306192728363981	0.506	0.414	3.00508275516199e-22	JZP 1	Hspa4
1807	Dym	1.41425196497075e-26	0.32602187291485	0.538	0.453	3.04248025224157e-22	JZP 1	Dym
1808	Cdk5rap2	1.69160878523959e-26	0.320716229463992	0.275	0.176	3.63915797968592e-22	JZP 1	Cdk5rap2
1809	Cdk8	1.9377002462274e-26	0.291140563225183	0.572	0.491	4.168574539709e-22	JZP 1	Cdk8
1810	Taf3	2.62127462223716e-26	0.338445508147693	0.432	0.332	5.6391480948188e-22	JZP 1	Taf3
1811	Tnrc6c	2.84073729982954e-26	0.307523846123118	0.537	0.455	6.1112781531233e-22	JZP 1	Tnrc6c
1812	Klhl22	3.24897621272926e-26	0.297109087680907	0.556	0.474	6.98952252644446e-22	JZP 1	Klhl22
1813	Nol10	1.04870724559184e-25	0.334650964148328	0.3	0.201	2.25608389744173e-21	JZP 1	Nol10
1814	Ppm1g	1.12276483532543e-25	0.323833135747611	0.269	0.171	2.41540399023561e-21	JZP 1	Ppm1g
1815	Fubp1	1.70078266973303e-25	0.294966975133241	0.6	0.53	3.65889375739667e-21	JZP 1	Fubp1
1816	Hspd1	1.77994964009839e-25	0.327071868726872	0.292	0.194	3.82920566074367e-21	JZP 1	Hspd1
1817	Ipo7	2.22095838471991e-25	0.33821916061504	0.359	0.26	4.77794777304793e-21	JZP 1	Ipo7
1818	Cdkn1c1	3.89584067703289e-25	0.266465435991466	0.572	0.472	8.38112204850086e-21	JZP 1	Cdkn1c
1819	Prom1	5.18849260613053e-25	0.352457673162741	0.273	0.179	1.11620041435686e-20	JZP 1	Prom1
1820	Tfap2c2	5.25125075999291e-25	0.285195118993489	0.502	0.405	1.12970157599728e-20	JZP 1	Tfap2c
1821	Arhgap232	6.67852743133693e-25	0.265717803242157	0.717	0.661	1.43675160630351e-20	JZP 1	Arhgap23
1822	Evl	8.29750522316691e-25	0.303874806349963	0.352	0.246	1.7850422986599e-20	JZP 1	Evl
1823	Eif2a	1.09616700450413e-24	0.322826850395097	0.305	0.208	2.35818407678973e-20	JZP 1	Eif2a
1824	Tmem1312	1.83647133077389e-24	0.318987086785494	0.389	0.286	3.95080077389388e-20	JZP 1	Tmem131
1825	Sema4d2	2.15690327330987e-24	0.292350711640429	0.581	0.492	4.64014601187152e-20	JZP 1	Sema4d
1826	Znrf2	2.65217222811807e-24	0.355521829989136	0.287	0.193	5.7056181143504e-20	JZP 1	Znrf2
1827	Vps501	2.76871000293307e-24	0.329441152640854	0.352	0.254	5.95632582930991e-20	JZP 1	Vps50
1828	Fkbp5	2.84622534910506e-24	0.279510825002225	0.335	0.227	6.12308459352972e-20	JZP 1	Fkbp5
1829	Rad18	2.95404230221308e-24	0.299974150748088	0.252	0.158	6.35503120475099e-20	JZP 1	Rad18
1830	Iqcb1	4.4279860552815e-24	0.349021530191752	0.272	0.179	9.52592640072708e-20	JZP 1	Iqcb1
1831	Pkig1	7.20396559929068e-24	0.31338836165715	0.453	0.357	1.5497891193754e-19	JZP 1	Pkig
1832	Slc20a2	7.82031189456077e-24	0.335566916737341	0.381	0.288	1.68238369787686e-19	JZP 1	Slc20a2
1833	Sf3b3	9.31199456090841e-24	0.319208966360525	0.439	0.35	2.00328938988823e-19	JZP 1	Sf3b3
1834	Xpo7	1.01090414268063e-23	0.295825666118969	0.52	0.431	2.17475808214884e-19	JZP 1	Xpo7
1835	Rbm26	1.20400245873685e-23	0.282926931921639	0.553	0.482	2.59017048948058e-19	JZP 1	Rbm26
1836	Nhsl11	1.72651334386678e-23	0.258827396475996	0.572	0.481	3.7142481566606e-19	JZP 1	Nhsl1
1837	Mre11a	2.03568814919597e-23	0.312349857007362	0.286	0.193	4.37937591536529e-19	JZP 1	Mre11a
1838	Elavl1	2.2765717769891e-23	0.283686920445739	0.453	0.359	4.89758886383664e-19	JZP 1	Elavl1
1839	Fam172a	3.23011859456342e-23	0.263565080392543	0.678	0.644	6.94895413248428e-19	JZP 1	Fam172a
1840	Itpr11	3.44696018203515e-23	0.283005476968929	0.478	0.378	7.41544543961223e-19	JZP 1	Itpr1
1841	Shq1	3.45194155099126e-23	0.308367606091599	0.257	0.166	7.4261618586475e-19	JZP 1	Shq1
1842	Esf1	4.49836775295197e-23	0.311826033455569	0.352	0.258	9.67733854692556e-19	JZP 1	Esf1
1843	Rps9	6.04152731134077e-23	0.30964389374307	0.254	0.166	1.29971377048874e-18	JZP 1	Rps9
1844	Gtpbp4	6.31846554513098e-23	0.306275484865333	0.301	0.21	1.35929149272403e-18	JZP 1	Gtpbp4
1845	Cbx1	1.01360467278203e-22	0.311419361718019	0.295	0.204	2.18056773255599e-18	JZP 1	Cbx1
1846	Vrk1	1.02341612091311e-22	0.310972160555507	0.323	0.229	2.20167510092037e-18	JZP 1	Vrk1
1847	Nr2f22	1.07923933388707e-22	0.282761266874773	0.31	0.21	2.32176757899126e-18	JZP 1	Nr2f2
1848	Atp2a2	1.78521307732563e-22	0.303830658701278	0.337	0.239	3.84052889325063e-18	JZP 1	Atp2a2
1849	Nln	4.19429134094573e-22	0.334086135621075	0.313	0.223	9.02317896177655e-18	JZP 1	Nln
1850	Eif2b3	4.24663022986455e-22	0.307422827475605	0.263	0.175	9.1357756135076e-18	JZP 1	Eif2b3
1851	Tomm70a	4.98010263034823e-22	0.301219308737099	0.38	0.289	1.07136947886682e-17	JZP 1	Tomm70a
1852	Ppp1r12c1	5.67424757148564e-22	0.32968160386911	0.371	0.281	1.22070088005371e-17	JZP 1	Ppp1r12c
1853	Itgb3	6.21092733173722e-22	0.334663792385315	0.272	0.186	1.33615679687663e-17	JZP 1	Itgb3
1854	Ube3c	6.86136265371007e-22	0.285086313974812	0.542	0.467	1.47608494769265e-17	JZP 1	Ube3c
1855	Gabpb2	7.69625369829586e-22	0.323478468619166	0.404	0.317	1.65569505811439e-17	JZP 1	Gabpb2
1856	2410018L13Rik	9.2528564733211e-22	0.319467822111474	0.477	0.398	1.99056701310557e-17	JZP 1	2410018L13Rik
1857	Nucks1	1.10743883925e-21	0.289681847501617	0.294	0.204	2.38243317487853e-17	JZP 1	Nucks1
1858	Kpnb11	1.12825686220107e-21	0.285670433668351	0.29	0.2	2.42721898765316e-17	JZP 1	Kpnb1
1859	Phip1	1.2250688029604e-21	0.260328084188926	0.518	0.438	2.6354905158087e-17	JZP 1	Phip
1860	Galnt7	1.48095718757471e-21	0.292712108599383	0.297	0.203	3.18598319762948e-17	JZP 1	Galnt7
1861	Tusc3	2.02132626968156e-21	0.322063444571477	0.274	0.188	4.34847920396595e-17	JZP 1	Tusc3
1862	Rev3l	2.52263196721465e-21	0.29218132818932	0.492	0.411	5.42693815106888e-17	JZP 1	Rev3l
1863	Aatf	3.70047109885687e-21	0.300543223227894	0.437	0.354	7.96082347497079e-17	JZP 1	Aatf
1864	Ola1	4.50111691320701e-21	0.339765099654101	0.438	0.361	9.68325281538225e-17	JZP 1	Ola1
1865	Mcmbp	8.50109742054676e-21	0.298222143624254	0.351	0.26	1.82884108808223e-16	JZP 1	Mcmbp
1866	Rap1gds1	1.67682527774252e-20	0.30484093305675	0.475	0.394	3.60735422000749e-16	JZP 1	Rap1gds1
1867	Smc1a	2.71010721323464e-20	0.314983729063721	0.288	0.202	5.83025364783169e-16	JZP 1	Smc1a
1868	Osbpl10	2.90430874428885e-20	0.250695158164817	0.448	0.349	6.24803940158859e-16	JZP 1	Osbpl10
1869	Nmt2	4.00214361788677e-20	0.281599863507921	0.466	0.379	8.60981156515981e-16	JZP 1	Nmt2
1870	Tomm40	4.52865170680279e-20	0.284802610787196	0.403	0.316	9.74248841684483e-16	JZP 1	Tomm40
1871	Xrn2	4.62533965731024e-20	0.312330107003632	0.395	0.313	9.95049320477153e-16	JZP 1	Xrn2
1872	Nat10	6.21576689478409e-20	0.260930333880781	0.252	0.167	1.3371979320749e-15	JZP 1	Nat10
1873	Zfp808	7.1954367272858e-20	0.286395776648777	0.272	0.187	1.54795430314099e-15	JZP 1	Zfp808
1874	Mir17hg	1.42156781710519e-19	0.292729319931009	0.276	0.191	3.05821884493841e-15	JZP 1	Mir17hg
1875	Srbd1	1.58667734873086e-19	0.287576259264088	0.422	0.34	3.41341898032469e-15	JZP 1	Srbd1
1876	Dhx9	1.60233460288683e-19	0.314716998112744	0.431	0.356	3.44710243119043e-15	JZP 1	Dhx9
1877	Dgcr8	1.64106355722419e-19	0.302481372330115	0.279	0.197	3.5304200306564e-15	JZP 1	Dgcr8
1878	Rock1	2.77116092814047e-19	0.260598465965355	0.553	0.494	5.9615985047086e-15	JZP 1	Rock1
1879	Rsrc1	3.62324349117536e-19	0.263765453991935	0.579	0.539	7.79468372256554e-15	JZP 1	Rsrc1
1880	Gm26561	3.64176390537112e-19	0.290557752729075	0.356	0.274	7.8345266896249e-15	JZP 1	Gm26561
1881	Pdss2	4.75449353615963e-19	0.290380311095129	0.496	0.429	1.02283419443402e-14	JZP 1	Pdss2
1882	Nup155	4.76273168737723e-19	0.278185913685687	0.277	0.195	1.02460646790546e-14	JZP 1	Nup155
1883	Dhx15	6.0608295200017e-19	0.289832101993665	0.393	0.31	1.30386625463797e-14	JZP 1	Dhx15
1884	Eefsec	6.27973525994075e-19	0.271485144330017	0.503	0.43	1.35095944647105e-14	JZP 1	Eefsec
1885	Nup153	6.73178411709188e-19	0.285973585864786	0.414	0.335	1.44820871710998e-14	JZP 1	Nup153
1886	Ero1l	1.94537231810628e-18	0.262318027747421	0.38	0.296	4.18507946794205e-14	JZP 1	Ero1l
1887	Asxl2	2.3425381719e-18	0.264056977903362	0.532	0.475	5.03950236920847e-14	JZP 1	Asxl2
1888	Hnrnpll	2.67292069462389e-18	0.299821600096043	0.35	0.27	5.75025429034438e-14	JZP 1	Hnrnpll
1889	Cpsf6	7.98186649524353e-18	0.270946597468151	0.339	0.257	1.71713893912174e-13	JZP 1	Cpsf6
1890	Gm26624	1.24625777866805e-17	0.290075138260134	0.296	0.218	2.68107435924857e-13	JZP 1	Gm26624
1891	Tlk2	1.4270513306117e-17	0.274028728044513	0.533	0.486	3.07001552754495e-13	JZP 1	Tlk2
1892	Rbm28	1.4472728180846e-17	0.281169801159087	0.368	0.292	3.11351801354539e-13	JZP 1	Rbm28
1893	Brip1os	1.52719570226358e-17	0.30532976419323	0.385	0.302	3.28545611427963e-13	JZP 1	Brip1os
1894	E2f7	1.69949735829306e-17	0.300478249735217	0.267	0.19	3.65612866689586e-13	JZP 1	E2f7
1895	Ckap5	1.78694345894744e-17	0.288098006520069	0.426	0.358	3.84425146323362e-13	JZP 1	Ckap5
1896	Ccnt1	2.04509414990454e-17	0.281313494514098	0.405	0.333	4.39961104468964e-13	JZP 1	Ccnt1
1897	Psmd14	2.33776392522215e-17	0.255927582818328	0.493	0.427	5.02923153233042e-13	JZP 1	Psmd14
1898	Depdc5	2.47506220961973e-17	0.259374262266786	0.385	0.306	5.32460133155493e-13	JZP 1	Depdc5
1899	Btbd1	3.13999460292674e-17	0.260441816285031	0.281	0.202	6.7550703892763e-13	JZP 1	Btbd1
1900	Khsrp	3.81066532320871e-17	0.263134014748112	0.252	0.175	8.19788430981889e-13	JZP 1	Khsrp
1901	Gls	3.96252754788159e-17	0.288815256119822	0.383	0.308	8.52458551375766e-13	JZP 1	Gls
1902	Pnn1	4.24790422821921e-17	0.292143206739233	0.394	0.323	9.13851636616798e-13	JZP 1	Pnn
1903	Ddx10	4.71163028218817e-17	0.288299305911464	0.332	0.255	1.01361302260714e-12	JZP 1	Ddx10
1904	Heatr5a	4.74577715720747e-17	0.290626722144537	0.338	0.261	1.02095903983004e-12	JZP 1	Heatr5a
1905	Abcb7	5.11616970898117e-17	0.275413333749579	0.262	0.185	1.10064158949312e-12	JZP 1	Abcb7
1906	Smg7	5.71297967224373e-17	0.255185884575939	0.474	0.41	1.22903331688979e-12	JZP 1	Smg7
1907	Pdcd11	7.06805738108431e-17	0.260437995726096	0.271	0.192	1.52055118439267e-12	JZP 1	Pdcd11
1908	Ccdc58	9.22134951659747e-17	0.284738787492276	0.301	0.223	1.98378892150561e-12	JZP 1	Ccdc58
1909	Zeb11	9.7374649644749e-17	0.297723941502913	0.286	0.21	2.09482083780748e-12	JZP 1	Zeb1
1910	Tbc1d82	1.16583791947355e-16	0.275309581918894	0.318	0.237	2.50806711616344e-12	JZP 1	Tbc1d8
1911	Rngtt	1.32453857020413e-16	0.277829831756059	0.469	0.41	2.84947982608014e-12	JZP 1	Rngtt
1912	Terf1	1.42394832692702e-16	0.258257196948569	0.273	0.195	3.06334003571809e-12	JZP 1	Terf1
1913	Usp14	1.52838542843674e-16	0.299014847907315	0.35	0.276	3.28801557219595e-12	JZP 1	Usp14
1914	Pibf1	1.72966059351909e-16	0.274437935487498	0.504	0.457	3.72101883483763e-12	JZP 1	Pibf1
1915	Frk1	1.84363788161119e-16	0.282745879135255	0.29	0.212	3.96621817471016e-12	JZP 1	Frk
1916	Metap1d	2.37138255168492e-16	0.292464524990776	0.302	0.226	5.10155528343978e-12	JZP 1	Metap1d
1917	Set	2.47799523330988e-16	0.268775486540162	0.281	0.203	5.33091114541954e-12	JZP 1	Set
1918	Chdh1	3.02164431691117e-16	0.266627173191817	0.251	0.175	6.500463418971e-12	JZP 1	Chdh
1919	Rprd1b	3.05389975794342e-16	0.288265179765441	0.362	0.29	6.56985454926367e-12	JZP 1	Rprd1b
1920	Uhrf2	3.20297135891112e-16	0.275028353989082	0.38	0.307	6.89055228442548e-12	JZP 1	Uhrf2
1921	Lrp5	3.34527571286658e-16	0.272190358021996	0.258	0.181	7.19669164108988e-12	JZP 1	Lrp5
1922	Tada2a	3.40462978995416e-16	0.291329780078337	0.254	0.181	7.32438006712839e-12	JZP 1	Tada2a
1923	Elovl62	4.48457041468776e-16	0.251884242372993	0.389	0.308	9.64765633311777e-12	JZP 1	Elovl6
1924	Fam129a	5.85666113935234e-16	0.26126338342699	0.308	0.228	1.25994351090887e-11	JZP 1	Fam129a
1925	Ppp2r2a	6.094576221063e-16	0.278164726414769	0.432	0.374	1.31112618243728e-11	JZP 1	Ppp2r2a
1926	Hsd17b12	8.47003205073416e-16	0.261592826181008	0.366	0.293	1.82215799507444e-11	JZP 1	Hsd17b12
1927	Smad5	9.58364969568807e-16	0.28773198958548	0.26	0.189	2.06173055903337e-11	JZP 1	Smad5
1928	Usp3	1.11186339145618e-15	0.278762814781416	0.306	0.23	2.39195171403967e-11	JZP 1	Usp3
1929	Tcerg1	1.35702826900175e-15	0.262451956571276	0.482	0.43	2.91937491510346e-11	JZP 1	Tcerg1
1930	Ywhae	2.2669283845493e-15	0.263755978823367	0.523	0.479	4.8768430336809e-11	JZP 1	Ywhae
1931	Dgkd	2.96464199859195e-15	0.251483308502756	0.392	0.318	6.37783433157085e-11	JZP 1	Dgkd
1932	Prpf4b	3.32340011030529e-15	0.269975063702041	0.535	0.489	7.14963065729977e-11	JZP 1	Prpf4b
1933	Trim6	3.44059207665323e-15	0.269626349328827	0.346	0.272	7.40174573450408e-11	JZP 1	Trim6
1934	Stip1	3.84435906790736e-15	0.279030647262431	0.326	0.256	8.2703696627891e-11	JZP 1	Stip1
1935	Nup214	4.70211337693726e-15	0.262233728756943	0.367	0.299	1.01156565078051e-10	JZP 1	Nup214
1936	Srsf10	6.16984253977609e-15	0.257996908827232	0.382	0.312	1.32731822558203e-10	JZP 1	Srsf10
1937	Man1a2	8.16586379378131e-15	0.254856541180116	0.482	0.429	1.75672227795617e-10	JZP 1	Man1a2
1938	R3hdm1	8.19360829242449e-15	0.252785660757347	0.503	0.456	1.76269095194928e-10	JZP 1	R3hdm1
1939	Cyb5b	1.74601475073592e-14	0.254576794698086	0.42	0.358	3.75620153325819e-10	JZP 1	Cyb5b
1940	Cs	2.199570331958e-14	0.268408002454459	0.359	0.29	4.73193565514124e-10	JZP 1	Cs
1941	Slf1	2.4741492212838e-14	0.280044238688837	0.362	0.296	5.32263721974784e-10	JZP 1	Slf1
1942	Tgs1	1.08708595344291e-13	0.250485050330384	0.283	0.214	2.33864801164172e-09	JZP 1	Tgs1
1943	Agpat4	1.6765292909787e-13	0.253660630777763	0.36	0.295	3.60671746368248e-09	JZP 1	Agpat4
1944	Gspt1	2.01417883676673e-13	0.262518893280848	0.384	0.322	4.33310293153626e-09	JZP 1	Gspt1
1945	Cnot10	2.48993565587023e-13	0.257802188377986	0.367	0.302	5.35659857647363e-09	JZP 1	Cnot10
1946	Dnmt1	2.66530691002799e-13	0.258579222098259	0.4	0.337	5.73387475554322e-09	JZP 1	Dnmt1
1947	Ncmap2	2.91174917182156e-13	0.25645758493357	0.307	0.236	6.26404599333971e-09	JZP 1	Ncmap
1948	Tpk11	6.43775422149345e-13	0.284249820250586	0.388	0.332	1.38495406566989e-08	JZP 1	Tpk1
1949	Cse1l	7.23010830422731e-13	0.252110095760828	0.316	0.251	1.55541319948842e-08	JZP 1	Cse1l
1950	BC005561	9.74412530475043e-13	0.269920330650315	0.281	0.217	2.09625367681096e-08	JZP 1	BC005561
1951	Dcaf1	1.49788080012373e-12	0.265864746651098	0.328	0.266	3.22239096530619e-08	JZP 1	Dcaf1
1952	Chd1	1.76418652193899e-12	0.273053337899302	0.331	0.274	3.79529446464734e-08	JZP 1	Chd1
1953	Cwf19l2	3.59581640920409e-12	0.250185487258069	0.32	0.258	7.73567984112075e-08	JZP 1	Cwf19l2
1954	Farsb	5.15398489268067e-12	0.26279966604668	0.301	0.242	1.10877676996239e-07	JZP 1	Farsb
1955	Rbm10	1.35231424726735e-11	0.269758827369895	0.312	0.253	2.90923364014626e-07	JZP 1	Rbm10
1956	Camkmt	2.74724722959237e-11	0.257627622698762	0.492	0.451	5.91015296502207e-07	JZP 1	Camkmt
1957	Selenoi	3.10906013054171e-11	0.25183818153257	0.345	0.289	6.68852105883438e-07	JZP 1	Selenoi
1958	Sos1	9.92986410224195e-11	0.260628466718276	0.419	0.374	2.13621166431531e-06	JZP 1	Sos1
1959	Ext2	2.99392381268288e-10	0.2761161421095	0.328	0.281	6.44082829822468e-06	JZP 1	Ext2
1960	Phactr21	2.91767049445045e-09	0.263815158548386	0.353	0.301	6.27678453471125e-05	JZP 1	Phactr2
1961	Ceacam14	0	2.37353920417926	0.904	0.154	0	SpT	Ceacam14
1962	Slit1	0	2.30436440100291	0.838	0.093	0	SpT	Slit1
1963	Flt11	0	2.22529020503988	1	0.589	0	SpT	Flt1
1964	St6gal1	0	2.12100923382468	0.964	0.247	0	SpT	St6gal1
1965	Lrp1	0	2.11927298648694	0.917	0.086	0	SpT	Lrp1
1966	Ceacam5	0	2.06496519870532	0.923	0.187	0	SpT	Ceacam5
1967	Mitf	0	2.05082480036541	0.997	0.523	0	SpT	Mitf
1968	Dapk2	0	2.01992281963125	0.935	0.161	0	SpT	Dapk2
1969	Taf7l	0	2.01791775788679	0.875	0.143	0	SpT	Taf7l
1970	Mgat4a	0	1.98212870068523	0.986	0.373	0	SpT	Mgat4a
1971	Prl8a9	0	1.95806184987577	0.945	0.311	0	SpT	Prl8a9
1972	Cts3	0	1.93021909756124	0.883	0.205	0	SpT	Cts3
1973	Ctsm	0	1.87132489296832	0.793	0.137	0	SpT	Ctsm
1974	Slco2a11	0	1.81276863004696	0.869	0.218	0	SpT	Slco2a1
1975	Colec12	0	1.81057286699674	0.829	0.214	0	SpT	Colec12
1976	Srgap1	0	1.80438584537637	0.972	0.448	0	SpT	Srgap1
1977	Pappa21	0	1.75644493976675	1	0.747	0	SpT	Pappa2
1978	Arhgap39	0	1.73078372162497	0.94	0.297	0	SpT	Arhgap39
1979	1700025G04Rik	0	1.70717717030745	1	0.761	0	SpT	1700025G04Rik
1980	Smad3	0	1.69582244655612	0.795	0.138	0	SpT	Smad3
1981	Psg21	0	1.67514053804027	0.779	0.141	0	SpT	Psg21
1982	Lifr	0	1.61075866612427	0.974	0.378	0	SpT	Lifr
1983	Psg27	0	1.59598145223777	0.822	0.16	0	SpT	Psg27
1984	Ptprj	0	1.59117638300949	0.908	0.246	0	SpT	Ptprj
1985	Megf11	0	1.58836875900493	0.43	0.025	0	SpT	Megf11
1986	Maml3	0	1.5495651790421	0.999	0.877	0	SpT	Maml3
1987	Pcnx	0	1.52437002428605	0.853	0.237	0	SpT	Pcnx
1988	Gns	0	1.4925336258983	0.836	0.241	0	SpT	Gns
1989	Prl7a2	0	1.49192589351452	0.819	0.239	0	SpT	Prl7a2
1990	Psg18	0	1.4808524726399	0.714	0.084	0	SpT	Psg18
1991	Xylt11	0	1.47007381431527	0.983	0.491	0	SpT	Xylt1
1992	Nhs1	0	1.45485802804136	0.978	0.536	0	SpT	Nhs
1993	Ppm1h1	0	1.43643305477743	0.772	0.203	0	SpT	Ppm1h
1994	Fbln7	0	1.42698836438034	0.627	0.042	0	SpT	Fbln7
1995	Psg23	0	1.42607880851105	0.708	0.172	0	SpT	Psg23
1996	Plekhg11	0	1.40782451873184	0.961	0.457	0	SpT	Plekhg1
1997	Fbln1	0	1.37805625987525	0.551	0.094	0	SpT	Fbln1
1998	Prkag2	0	1.36254455513677	0.679	0.125	0	SpT	Prkag2
1999	Psg17	0	1.35024688393387	0.633	0.077	0	SpT	Psg17
[truncated: 4,473 more rows]
