# Supplementary material for: Single nuclei RNA-seq of mouse placental labyrinth development
Source: eLife. 2020 Nov 3;9:e60266. doi: 10.7554/eLife.60266 (PMC7669270; doi:10.7554/eLife.60266)
Supplement: Figure 2—source data 2. [file elife-60266-fig2-data2.csv]

	AACAAAGGTACATACC_1	AACCTGAGTGAGATAT_1	AGTCTCCTCGGCAGTC_1	CACCAAAGTTTGGAGG_1	CCTTGTGTCATGCCAA_1	CGGGTGTCAATCTGCA_1	CTGTGGGCACTGAATC_1	GACATCACAGACCGCT_1	GCACATAGTGCACAAG_1	GCTACAAAGGCAGGGA_1	GGGACTCGTTAGTCGT_1	GGTTCTCAGGTAGCAC_1	TATGTTCCAGCGAGTA_1	TCACATTGTAAGGAGA_1	TCTCCGAAGTGATTCC_1	TGAGGAGGTGTGCCTG_1	TGGGAGAGTCTTCAAG_1	TTGAGTGGTGCATTTG_1	TTTGATCCATTGTGCA_1	TTTGTTGGTAACGCGA_1	ACGTCCTTCTCCCAAC_2	ACTATTCGTACGATCT_2	ACTCCCAAGATCGACG_2	AGGGTTTGTGAGAACC_2	AGTAGCTTCCGAACGC_2	AGTTCGATCCCATAGA_2	ATTTCTGCAGCTGGTC_2	CAAAGAAGTGATTCTG_2	CGAGTTAAGAGAGTTT_2	CGTAAGTAGTCACTAC_2	CGTTCTGGTTGCCATA_2	GAGCCTGAGTGATCGG_2	GAGTTGTTCGTCCATC_2	GTGATGTCAATTTCTC_2	GTTCGCTGTTCTCTAT_2	TCGATTTTCATTCGGA_2	TCGGATAAGCTCCATA_2	TGATTCTCATCGTTCC_2	TGTTACTCAGTAACGG_2	TTGTTTGCACGACAAG_2	ATCGTAGTCCGACGGT_3	CACTAAGTCCATTGCC_3	CAGGCCATCGTTATCT_3	CCATCACCATGAAGGC_3	CCTCTAGTCAAGAGTA_3	CGGGTGTCAACTGTGT_3	CTCCATGAGCATCGAG_3	CTTTCAAAGCTCTATG_3	GATGATCAGGTAGTAT_3
Gm28153	2.0767337617138	0	0	1.91353563432951	0	0	0	0	0	0	2.40428332153369	3.32538313578801	2.1065965598764	0	1.61232414870373	1.83159513585076	1.78141811543332	1.82764235530237	0	1.93933903819439	0	0	0	1.34549899220371	0	1.61103983508343	0	0	1.89697833179407	1.98532411759619	0	0	0	0	2.10977392952907	0	0	0	0	0	0	0	0	0	0	0	0	0	0
Lrrfip1	0	0	1.53736192508292	0	0	1.86080059627647	1.65820783880945	0	0	1.49011536301151	0	2.29621992739132	0	0	0	0	0	0	0	0	0	1.07593735315205	0	0	0	0	0	1.9697705634872	0	1.98532411759619	0	0	0	0	0	0	1.41777666095699	0	2.06763174829063	0	0	0	0	0	0	2.22471274565542	0	0	2.58266956932763
Phlpp1	0	0	1.53736192508292	0	0	1.86080059627647	2.62101564260524	2.0752093313443	0	0	0	0	2.1065965598764	0	0	1.83159513585076	0	0	0	0	0	0	0	0	0	0	1.31821006104027	0	1.89697833179407	0	0	1.69641216920991	2.29782894816441	1.88740912115649	1.53108459818759	0	1.98181008988843	0	2.06763174829063	0	0	0	2.14893933617676	2.30510898111946	0	0	0	0	0
Cdc73	2.0767337617138	0	2.48130875585591	1.91353563432951	0	0	1.65820783880945	0	0	2.06372046693815	0	2.29621992739132	0	0	0	1.83159513585076	0	0	1.45591183197954	1.38054700437752	1.81376069513352	1.58216563210548	0	1.34549899220371	0	0	0	0	1.89697833179407	1.98532411759619	1.05050045916668	1.69641216920991	2.29782894816441	0	0	0	2.34024664031611	0	2.06763174829063	0	2.2058037184276	0	0	0	0	0	0	2.26314385595782	1.96237499240504
Fam129a	2.0767337617138	0	0	0	1.9607996208036	0	0	1.50031631752831	0	0	2.40428332153369	0	0	0	0	1.83159513585076	0	0	0	2.29568429039192	1.81376069513352	1.91666108955033	2.12520704909252	0	2.53698058623264	1.61103983508343	2.85763970874937	1.9697705634872	0	0	1.55141957711566	2.29341174306379	1.70042526017336	0	1.53108459818759	0	0	2.34549268838946	2.06763174829063	0	2.84229485571925	2.88994685880331	0	0	2.61316976459608	2.22471274565542	0	0	0
Lamc1	2.0767337617138	0	0	0	1.9607996208036	0	0	0	0	0	0	0	2.73698960203957	0	0	0	0	1.82764235530237	1.45591183197954	0	0	0	0	0	0	1.61103983508343	0	1.9697705634872	0	1.98532411759619	1.05050045916668	0	0	0	0	1.97189696193637	1.41777666095699	0	0	0	0	0	2.14893933617676	2.94709552721833	0	0	2.32985368712411	2.26314385595782	0
Cep350	2.0767337617138	2.16039887906589	0	1.91353563432951	1.9607996208036	0	0	0	0	0	0	0	0	0	1.61232414870373	0	0	0	0	1.93933903819439	1.81376069513352	1.58216563210548	0	1.34549899220371	1.91996529756053	0	1.86770977587311	0	0	0	1.05050045916668	2.29341174306379	0	0	1.53108459818759	0	0	0	0	0	0	0	2.14893933617676	0	0	3.24853074860739	0	2.90287816213688	1.96237499240504
Pappa2	0	0	0	0	0	0	0	0	0	0	0	0	0	0	0	0	0	0	0	0	1.81376069513352	1.58216563210548	3.14086644680827	1.89914859896049	0	0	2.22030946179844	2.97077821408116	1.89697833179407	1.98532411759619	1.05050045916668	0	1.70042526017336	2.87957606515677	1.53108459818759	2.59290746158095	0	1.74383018970019	2.69544810697013	1.67598354048649	3.22813812817313	3.55491101976925	2.78201386269936	3.83138445240398	3.4844829050749	2.22471274565542	2.97312237002494	2.90287816213688	1.96237499240504
Mpzl1	0	2.16039887906589	1.53736192508292	0	0	1.86080059627647	1.65820783880945	2.43793040895244	0	2.69127221462781	3.05121366375915	0	2.1065965598764	0	1.61232414870373	2.81729409483669	1.78141811543332	0	2.02508882896837	0	2.42187281397639	2.67615934272763	0	0	2.91572351951435	0	0	1.9697705634872	2.89021436433324	2.60733178829351	1.88361594048484	2.93478048241059	2.29782894816441	1.88740912115649	2.74037240642779	1.97189696193637	0	2.71850347605744	0	0	0	0	2.14893933617676	0	0	0	2.32985368712411	0	0
Etl4	3.36430751591787	2.79417860972536	3.40845126176947	3.39735793877698	1.9607996208036	3.33734869371362	2.25126943049447	2.70353520553434	2.72225819321283	3.46381113997815	2.7791757414457	2.29621992739132	3.12062993213019	3.625132096332	2.56827889162845	2.81729409483669	3.03269497873618	3.08542793606403	3.70033122446731	2.76539935017192	3.73928169454661	3.46335337994883	3.41767832420624	3.38102945050211	4.26054607017825	2.83509769274711	3.86124235580917	4.03461726029295	2.512152484619	3.26291675365922	3.53989989481686	3.32237268963953	3.6057751411999	3.36768211680924	3.61716549251262	3.64036522589665	3.56691679357342	3.20258528629371	3.57038829486904	3.29821521770717	3.50586298710512	3.27671181519971	3.44371490765316	3.61364616143773	1.99076229945814	2.22471274565542	4.18867039309371	4.24715313350651	3.23729835533857
Cacna1b	0	0	0	0	0	0	1.65820783880945	0	0	0	0	0	0	0	0	0	0	1.82764235530237	0	0	0	0	0	0	0	0	0	0	0	0	0	0	0	0	0	0	0	0	0	0	0	0	0	0	0	0	0	0	0
Fam129b	0	0	0	0	0	0	0	0	0	0	0	0	0	0	0	1.83159513585076	0	0	0	0	1.81376069513352	0	0	0	0	0	0	0	0	0	0	0	0	0	0	0	0	0	0	0	0	0	0	0	0	2.22471274565542	2.32985368712411	0	0
Ralgps1	0	0	0	0	1.9607996208036	0	0	0	0	0	0	0	0	0	0	0	0	1.82764235530237	0	0	0	1.07593735315205	0	0	0	1.61103983508343	0	0	0	0	0	0	0	0	0	0	0	0	0	0	0	2.25088926712533	0	0	0	0	0	0	0
Cobll1	0	0	0	3.18254498169763	1.9607996208036	1.86080059627647	0	0	0	0	0	2.29621992739132	0	0	1.61232414870373	1.83159513585076	0	2.81286777189737	2.02508882896837	1.38054700437752	3.2834400130275	1.58216563210548	2.12520704909252	1.34549899220371	1.91996529756053	2.19900433308965	1.31821006104027	0	2.512152484619	0	1.55141957711566	0	0	2.5018032443378	3.12408724813577	1.97189696193637	2.34024664031611	2.34549268838946	0	0	0	2.25088926712533	2.78201386269936	2.30510898111946	2.61316976459608	2.22471274565542	3.36139270087774	2.26314385595782	1.96237499240504
Cers6	0	0	0	1.91353563432951	0	0	0	0	0	0	0	0	0	0	0	1.83159513585076	0	0	0	0	0	1.07593735315205	0	0	0	0	1.31821006104027	0	0	0	0	0	0	0	1.53108459818759	1.97189696193637	0	0	0	0	0	0	0	0	0	0	0	0	0
Wipf1	0	0	0	0	0	0	2.25126943049447	0	0	0	0	0	0	0	0	0	0	0	0	0	0	0	0	0	2.53698058623264	1.61103983508343	0	0	1.89697833179407	0	1.05050045916668	0	1.70042526017336	1.88740912115649	0	0	0	0	0	0	2.2058037184276	0	2.14893933617676	0	0	2.22471274565542	0	2.26314385595782	0
Plcb4	2.0767337617138	2.79417860972536	0	1.91353563432951	1.9607996208036	2.47298278394242	2.25126943049447	2.43793040895244	0	2.06372046693815	2.40428332153369	0	2.73698960203957	0	2.56827889162845	3.08992155079524	1.78141811543332	1.82764235530237	3.52294055858267	1.93933903819439	2.7973063758348	2.80105013918008	0	1.34549899220371	2.91572351951435	2.56679750214283	2.22030946179844	1.9697705634872	3.16390797782261	1.98532411759619	1.88361594048484	0	2.66922809545352	0	0	0	1.41777666095699	0	0	1.67598354048649	3.50586298710512	0	2.14893933617676	3.61364616143773	0	2.22471274565542	4.03704426338516	2.26314385595782	0
Rrbp1	2.0767337617138	2.16039887906589	2.48130875585591	2.53004053634353	1.9607996208036	1.86080059627647	3.10231813251962	1.50031631752831	0	1.49011536301151	0	0	2.1065965598764	0	1.61232414870373	1.83159513585076	3.2461546717212	1.82764235530237	2.38556280584336	2.29568429039192	1.81376069513352	1.91666108955033	2.75679354111974	1.89914859896049	2.53698058623264	0	1.86770977587311	0	2.89021436433324	0	1.88361594048484	0	1.70042526017336	2.87957606515677	0	2.97312237002494	1.98181008988843	1.74383018970019	2.06763174829063	0	0	2.25088926712533	3.16662513452432	2.30510898111946	2.61316976459608	0	0	2.26314385595782	0
Bcl2l1	0	0	0	0	0	0	0	0	0	1.49011536301151	0	0	0	0	1.61232414870373	0	0	1.82764235530237	0	0	0	0	0	0	0	0	1.31821006104027	0	0	0	1.05050045916668	0	1.70042526017336	0	2.47397757925581	0	1.41777666095699	1.74383018970019	2.06763174829063	0	0	0	0	0	1.99076229945814	0	0	0	0
Tgm2	0	0	0	0	1.9607996208036	0	0	0	2.09276742391351	0	0	0	0	2.31574019311609	0	0	0	0	0	0	0	1.07593735315205	0	1.34549899220371	0	0	0	1.9697705634872	0	1.98532411759619	0	0	0	0	1.53108459818759	0	0	0	0	0	0	0	0	0	1.99076229945814	0	0	2.26314385595782	0
Ncoa3	0	0	0	0	0	0	0	0	0	0	0	0	0	0	0	0	0	0	0	0	0	0	0	2.25342706793153	0	1.61103983508343	0	0	0	0	0	0	1.70042526017336	0	1.53108459818759	1.97189696193637	1.41777666095699	0	0	0	0	0	0	2.30510898111946	1.99076229945814	0	0	0	0
B4galt5	0	0	0	0	1.9607996208036	0	0	1.50031631752831	2.09276742391351	0	0	0	0	0	2.20043099290899	0	0	0	0	0	0	0	2.12520704909252	0	0	1.61103983508343	0	0	0	1.98532411759619	0	0	0	0	1.53108459818759	0	1.41777666095699	0	0	0	0	0	0	0	0	0	2.32985368712411	0	0
Gnas	2.0767337617138	2.16039887906589	1.53736192508292	0	0	0	1.65820783880945	0	0	0	1.79761673641301	0	0	0	2.20043099290899	0	1.78141811543332	0	0	0	0	1.58216563210548	2.75679354111974	1.89914859896049	1.91996529756053	0	0	0	0	0	1.05050045916668	0	1.70042526017336	0	0	0	0	2.34549268838946	0	1.67598354048649	0	0	2.14893933617676	0	0	2.22471274565542	2.32985368712411	2.26314385595782	2.58266956932763
Lama5	0	0	0	0	0	0	0	0	2.09276742391351	1.49011536301151	0	0	0	0	0	0	0	0	0	1.38054700437752	1.81376069513352	1.58216563210548	2.12520704909252	0	2.91572351951435	0	0	0	0	0	1.88361594048484	0	0	0	0	0	1.41777666095699	2.34549268838946	2.06763174829063	1.67598354048649	0	2.25088926712533	2.14893933617676	0	0	2.22471274565542	0	0	0
Bcorl1	0	0	0	0	0	0	0	0	0	0	0	0	0	0	0	0	0	0	0	0	0	0	0	0	0	0	0	0	0	0	0	0	0	0	0	0	0	0	0	0	0	0	0	0	0	0	0	0	0
Elf4	0	0	0	0	2.5809750428345	0	1.65820783880945	2.70353520553434	0	1.49011536301151	2.40428332153369	0	2.1065965598764	0	0	0	0	2.4369772841275	2.38556280584336	0	1.81376069513352	0	0	1.89914859896049	0	0	1.31821006104027	3.24556160483345	2.512152484619	1.98532411759619	0	0	0	1.88740912115649	2.10977392952907	0	1.41777666095699	2.34549268838946	0	1.67598354048649	0	0	0	0	0	0	0	0	0
Arhgef6	0	0	2.74786072735801	0	0	0	0	0	0	0	0	2.29621992739132	0	2.31574019311609	0	0	0	0	1.45591183197954	0	0	2.1668756163322	2.75679354111974	1.89914859896049	0	0	0	0	0	2.60733178829351	0	0	0	0	2.10977392952907	1.97189696193637	0	0	0	0	0	0	0	0	0	0	0	0	2.58266956932763
Pola1	2.0767337617138	0	2.11680980684066	1.91353563432951	1.9607996208036	0	2.89034814709658	2.0752093313443	0	0	0	0	2.1065965598764	2.31574019311609	0	1.83159513585076	2.38660847126374	1.82764235530237	0	0	0	0	2.12520704909252	0	0	0	0	0	0	1.98532411759619	1.05050045916668	0	0	0	1.53108459818759	0	0	2.71850347605744	0	0	2.2058037184276	0	0	2.30510898111946	0	2.22471274565542	2.32985368712411	0	0
Maged1	2.0767337617138	0	0	0	0	0	0	0	0	0	0	0	0	0	0	0	0	0	0	1.38054700437752	0	0	0	1.34549899220371	0	0	0	0	0	0	1.05050045916668	0	0	0	0	0	0	1.74383018970019	0	0	0	0	2.14893933617676	2.30510898111946	0	2.22471274565542	0	0	0
Xist	3.36430751591787	4.13351361809926	4.08491381878514	3.57408695965933	4.52802011599812	4.19187318558952	3.77273651311961	3.67158517253952	3.92693612562344	4.19440919560885	2.7791757414457	4.1519191010346	4.81821234810899	4.42114855474918	3.7170907535653	3.30392232921793	4.31847528044767	4.55330536252493	4.20122152039663	4.46975380434608	3.45949211823358	3.89829958163885	4.09429539680505	4.10499014831441	3.18977186678287	3.89378148362176	4.35193272760346	3.46088532368559	3.70524620163808	4.15597370446454	4.10248817345555	3.81866637277756	4.00214353979692	3.69425712534805	3.79500055002248	4.23450078750035	4.15196308173811	3.87519452063808	3.74800799473286	4.05130887786493	2.2058037184276	0	2.14893933617676	0	0	2.22471274565542	0	2.26314385595782	1.96237499240504
Brwd3	0	0	1.53736192508292	0	0	0	2.25126943049447	0	0	0	0	0	0	0	0	0	0	0	0	0	0	0	0	0	0	0	0	0	0	0	0	0	0	0	0	1.97189696193637	0	0	0	0	2.2058037184276	0	0	2.30510898111946	1.99076229945814	2.22471274565542	0	0	0
Mid1	2.0767337617138	2.16039887906589	2.48130875585591	1.91353563432951	0	2.47298278394242	2.25126943049447	0	0	2.06372046693815	3.26485188594011	0	3.12062993213019	2.95828168230784	1.61232414870373	2.44127489383508	0	1.82764235530237	2.64996674108913	1.38054700437752	2.7973063758348	2.36684574406429	0	3.16635305706981	2.53698058623264	2.83509769274711	3.34523597159475	1.9697705634872	3.16390797782261	0	2.49769862269068	2.66465747126812	2.66922809545352	2.87957606515677	2.10977392952907	1.97189696193637	3.25899841940706	2.98955466600737	0	3.29821521770717	2.84229485571925	0	2.14893933617676	2.30510898111946	0	0	0	2.26314385595782	0
Fndc3b	2.0767337617138	0	1.53736192508292	2.53004053634353	0	2.8499342352407	2.62101564260524	2.9131945832477	3.59831457182672	1.49011536301151	1.79761673641301	0	0	0	0	2.44127489383508	0	1.82764235530237	3.17883451862591	2.29568429039192	3.06962755075182	3.10279794458069	3.14086644680827	3.27944096983364	1.91996529756053	3.04642919776342	2.22030946179844	2.59062182185687	2.89021436433324	2.60733178829351	2.76459768562531	1.69641216920991	0	2.87957606515677	2.10977392952907	2.59290746158095	1.98181008988843	2.98955466600737	3.07815209415603	2.27089805024348	3.50586298710512	2.88994685880331	0	2.94709552721833	2.61316976459608	3.5264575884357	2.32985368712411	3.78569582032458	3.62958708665427
Wwtr1	0	0	0	0	0	0	1.65820783880945	0	2.72225819321283	0	0	2.29621992739132	0	0	0	0	0	1.82764235530237	2.02508882896837	0	0	2.1668756163322	0	1.34549899220371	0	0	0	2.97077821408116	0	0	1.55141957711566	2.29341174306379	1.70042526017336	0	2.10977392952907	0	0	2.34549268838946	0	0	0	0	0	0	1.99076229945814	2.22471274565542	0	0	0
Med12l	2.0767337617138	0	0	0	0	2.8499342352407	0	2.70353520553434	2.09276742391351	1.49011536301151	1.79761673641301	0	0	0	0	1.83159513585076	0	1.82764235530237	1.45591183197954	0	0	1.07593735315205	0	1.34549899220371	0	0	0	0	0	1.98532411759619	0	1.69641216920991	1.70042526017336	0	2.95052264812006	0	0	0	0	0	0	0	0	2.30510898111946	0	0	3.64036522589665	2.26314385595782	0
Rapgef2	2.70516164150896	0	2.74786072735801	2.53004053634353	1.9607996208036	2.8499342352407	2.62101564260524	2.70353520553434	0	0	0	0	2.1065965598764	2.95828168230784	1.61232414870373	0	0	0	2.85887879069998	1.93933903819439	0	2.36684574406429	2.12520704909252	1.89914859896049	2.53698058623264	2.56679750214283	2.68673356565757	0	2.89021436433324	2.98791283656216	2.13254695967852	1.69641216920991	0	1.88740912115649	2.10977392952907	2.59290746158095	1.41777666095699	1.74383018970019	2.69544810697013	0	0	2.88994685880331	2.78201386269936	3.3349084325076	1.99076229945814	3.5264575884357	0	0	1.96237499240504
Zfp697	0	0	0	1.91353563432951	0	0	0	0	0	0	0	0	0	0	0	1.83159513585076	0	0	0	0	0	0	2.12520704909252	0	0	0	0	1.9697705634872	0	0	0	0	0	0	0	0	0	0	0	0	0	2.25088926712533	0	0	0	0	0	0	0
Cnn3	0	0	0	0	0	0	0	0	0	0	0	0	0	0	0	0	0	0	0	0	0	0	2.12520704909252	0	0	0	1.31821006104027	0	0	0	1.05050045916668	1.69641216920991	0	0	0	0	0	0	0	0	0	0	0	0	0	0	0	2.26314385595782	0
Bcar3	0	2.79417860972536	2.11680980684066	2.90859484481995	0	1.86080059627647	0	1.50031631752831	0	2.06372046693815	0	0	2.1065965598764	0	0	1.83159513585076	0	0	1.45591183197954	2.55787098350466	1.81376069513352	1.58216563210548	0	1.89914859896049	1.91996529756053	0	2.22030946179844	1.9697705634872	0	2.60733178829351	1.88361594048484	0	1.70042526017336	2.5018032443378	2.47397757925581	0	2.60355817831654	0	0	0	0	0	0	0	3.26897751197573	0	0	2.90287816213688	0
Camk2d	2.0767337617138	2.79417860972536	0	0	0	0	0	1.50031631752831	0	0	0	0	2.1065965598764	2.31574019311609	0	0	0	0	0	1.93933903819439	1.81376069513352	0	2.12520704909252	0	0	0	0	2.59062182185687	0	0	1.88361594048484	1.69641216920991	0	0	2.10977392952907	0	1.98181008988843	0	2.06763174829063	0	0	0	2.14893933617676	2.94709552721833	1.99076229945814	2.22471274565542	0	2.26314385595782	0
Ppp3ca	2.70516164150896	2.79417860972536	2.11680980684066	0	0	1.86080059627647	2.25126943049447	2.0752093313443	0	2.06372046693815	0	0	2.73698960203957	0	2.20043099290899	2.44127489383508	0	1.82764235530237	0	2.55787098350466	1.81376069513352	0	2.12520704909252	2.25342706793153	1.91996529756053	0	2.48047245816107	0	0	0	2.13254695967852	2.66465747126812	0	0	2.95052264812006	2.59290746158095	0	3.20258528629371	0	1.67598354048649	2.2058037184276	0	0	2.30510898111946	1.99076229945814	0	0	0	1.96237499240504
Mllt3	2.0767337617138	0	0	2.90859484481995	0	0	0	0	0	0	0	0	0	0	0	0	0	0	0	0	0	0	0	0	0	0	0	0	1.89697833179407	0	0	0	0	0	0	0	0	0	0	0	0	0	0	0	0	0	0	0	1.96237499240504
Patj	0	0	0	0	2.5809750428345	1.86080059627647	0	0	0	1.49011536301151	1.79761673641301	0	2.1065965598764	3.34629267128739	0	0	0	0	1.45591183197954	0	0	0	0	1.89914859896049	0	0	1.86770977587311	0	0	0	1.05050045916668	0	1.70042526017336	0	0	0	0	0	2.06763174829063	1.67598354048649	2.84229485571925	2.25088926712533	0	0	1.99076229945814	0	0	2.26314385595782	1.96237499240504
Plpp3	0	0	0	1.91353563432951	0	0	0	0	0	0	0	0	2.1065965598764	2.31574019311609	0	0	0	1.82764235530237	1.45591183197954	1.38054700437752	2.42187281397639	0	0	1.34549899220371	0	0	1.31821006104027	1.9697705634872	1.89697833179407	0	0	2.66465747126812	0	0	0	0	1.41777666095699	1.74383018970019	0	0	2.2058037184276	0	2.14893933617676	0	0	0	2.32985368712411	3.28988561019803	1.96237499240504
Usp24	0	0	0	1.91353563432951	0	1.86080059627647	0	2.0752093313443	0	0	0	0	0	0	2.20043099290899	1.83159513585076	1.78141811543332	1.82764235530237	1.45591183197954	1.93933903819439	1.81376069513352	1.07593735315205	0	0	0	0	1.86770977587311	0	0	1.98532411759619	1.05050045916668	1.69641216920991	1.70042526017336	0	1.53108459818759	0	1.41777666095699	1.74383018970019	0	1.67598354048649	0	0	0	0	0	2.22471274565542	0	0	1.96237499240504
Echdc2	0	2.16039887906589	0	0	0	0	0	0	0	0	0	0	0	0	0	0	0	0	0	0	0	0	0	0	0	0	0	0	0	0	1.05050045916668	0	1.70042526017336	0	0	0	0	0	0	0	0	0	0	0	0	0	0	0	0
Osbpl9	0	0	0	0	0	0	0	0	0	1.49011536301151	0	2.29621992739132	0	0	0	0	1.78141811543332	0	1.45591183197954	1.93933903819439	0	2.36684574406429	0	2.25342706793153	1.91996529756053	0	1.31821006104027	1.9697705634872	0	0	0	1.69641216920991	0	2.5018032443378	1.53108459818759	0	1.41777666095699	0	0	1.67598354048649	0	0	0	0	0	0	0	0	0
Slc2a1	2.0767337617138	0	0	0	0	0	0	1.50031631752831	0	1.49011536301151	0	0	0	2.31574019311609	0	0	0	0	0	1.38054700437752	0	0	0	0	0	0	0	0	0	0	0	2.29341174306379	0	0	0	2.59290746158095	0	0	2.06763174829063	0	0	2.25088926712533	2.14893933617676	0	0	0	0	0	0
Macf1	2.0767337617138	0	0	0	0	2.8499342352407	1.65820783880945	1.50031631752831	0	0	0	2.29621992739132	3.12062993213019	0	2.20043099290899	2.44127489383508	3.03269497873618	3.08542793606403	0	2.55787098350466	2.42187281397639	2.1668756163322	3.81215377636766	3.16635305706981	2.53698058623264	3.2207978243387	1.86770977587311	3.24556160483345	1.89697833179407	2.98791283656216	2.76459768562531	0	0	1.88740912115649	2.10977392952907	0	2.34024664031611	2.71850347605744	3.07815209415603	0	3.22813812817313	2.25088926712533	3.16662513452432	2.30510898111946	1.99076229945814	3.24853074860739	0	2.26314385595782	2.58266956932763
Rsrp1	2.0767337617138	0	1.53736192508292	0	2.5809750428345	2.47298278394242	0	2.70353520553434	0	0	0	0	2.73698960203957	0	0	2.44127489383508	0	0	2.02508882896837	1.38054700437752	1.81376069513352	1.91666108955033	2.75679354111974	1.89914859896049	2.53698058623264	2.56679750214283	2.22030946179844	0	1.89697833179407	0	1.88361594048484	0	2.29782894816441	2.5018032443378	1.53108459818759	0	2.34024664031611	2.34549268838946	2.06763174829063	2.27089805024348	2.84229485571925	0	0	0	0	2.22471274565542	2.32985368712411	0	1.96237499240504
Ubr4	2.0767337617138	0	0	0	0	1.86080059627647	0	1.50031631752831	0	2.06372046693815	0	0	2.1065965598764	0	1.61232414870373	0	0	0	0	0	1.81376069513352	0	0	1.34549899220371	0	0	0	0	0	0	1.05050045916668	1.69641216920991	0	0	0	2.59290746158095	0	1.74383018970019	0	0	2.2058037184276	0	2.14893933617676	0	0	0	0	0	1.96237499240504
Kazn	0	0	0	0	0	0	0	1.50031631752831	0	2.06372046693815	0	0	0	0	0	1.83159513585076	0	0	0	1.38054700437752	1.81376069513352	0	0	1.89914859896049	0	1.61103983508343	0	0	2.512152484619	0	1.55141957711566	0	0	0	0	0	1.41777666095699	0	0	0	0	0	0	0	0	2.86229517162776	0	0	0
Prkcz	0	0	1.53736192508292	0	0	0	1.65820783880945	1.50031631752831	2.09276742391351	0	0	0	0	0	0	0	0	0	0	1.38054700437752	0	0	0	0	0	0	0	0	0	1.98532411759619	0	1.69641216920991	0	0	2.74037240642779	0	0	1.74383018970019	2.06763174829063	2.64135083751663	0	0	0	0	2.61316976459608	0	0	0	1.96237499240504
Abcb1b	0	0	0	0	0	0	0	0	0	0	0	0	0	2.31574019311609	0	0	0	0	0	0	0	0	0	0	1.91996529756053	0	0	0	0	0	0	0	0	0	0	0	0	0	0	0	2.2058037184276	0	0	0	0	0	0	0	0
Slc4a2	0	0	0	0	0	0	0	0	0	1.49011536301151	0	0	0	0	0	0	0	1.82764235530237	0	0	0	0	0	0	1.91996529756053	0	0	0	0	0	1.05050045916668	0	0	0	0	0	1.41777666095699	0	0	0	0	0	0	0	0	0	0	2.90287816213688	1.96237499240504
D5Ertd579e	0	0	1.53736192508292	0	0	1.86080059627647	1.65820783880945	0	2.09276742391351	0	0	0	0	2.31574019311609	0	0	0	1.82764235530237	0	0	1.81376069513352	0	0	0	1.91996529756053	1.61103983508343	1.31821006104027	0	0	0	1.55141957711566	0	0	0	2.10977392952907	1.97189696193637	1.41777666095699	0	0	1.67598354048649	0	0	0	0	0	0	0	2.90287816213688	0
Rbm47	0	2.16039887906589	0	0	1.9607996208036	1.86080059627647	0	0	2.09276742391351	0	0	0	2.1065965598764	0	2.20043099290899	0	0	0	0	2.55787098350466	0	1.58216563210548	2.12520704909252	1.34549899220371	2.91572351951435	0	1.31821006104027	0	1.89697833179407	0	2.33169797722837	0	0	1.88740912115649	1.53108459818759	0	1.98181008988843	2.34549268838946	3.35425633554896	2.27089805024348	0	2.25088926712533	0	2.30510898111946	0	2.22471274565542	2.97312237002494	2.26314385595782	3.23729835533857
Usp46	0	0	0	1.91353563432951	0	1.86080059627647	0	0	0	0	0	0	2.73698960203957	0	0	0	0	0	1.45591183197954	1.38054700437752	0	1.07593735315205	0	0	0	0	1.31821006104027	0	0	0	0	0	0	0	0	0	0	0	0	0	0	0	0	0	0	2.22471274565542	0	0	0
Uba6	0	0	0	0	0	0	1.65820783880945	2.0752093313443	0	1.49011536301151	0	0	0	0	1.61232414870373	1.83159513585076	0	0	1.45591183197954	1.93933903819439	0	1.07593735315205	0	0	0	0	1.86770977587311	1.9697705634872	0	0	1.55141957711566	0	1.70042526017336	0	0	0	1.41777666095699	0	0	0	0	0	0	2.30510898111946	0	0	0	0	0
Gcn1l1	0	0	0	2.53004053634353	0	0	0	1.50031631752831	0	1.49011536301151	1.79761673641301	0	0	0	0	0	1.78141811543332	0	0	1.93933903819439	1.81376069513352	1.58216563210548	0	0	1.91996529756053	0	0	1.9697705634872	0	0	0	0	1.70042526017336	1.88740912115649	0	0	1.41777666095699	0	0	1.67598354048649	0	0	2.14893933617676	0	0	2.86229517162776	0	0	1.96237499240504
Tbx3	0	0	0	0	0	0	0	0	0	0	0	0	0	0	0	0	0	0	0	0	0	0	0	0	0	0	0	0	0	0	0	0	0	0	0	0	0	0	0	0	0	0	0	0	0	0	0	0	0
Pitpnm2	0	0	0	0	0	0	0	0	0	0	0	0	0	2.31574019311609	1.61232414870373	1.83159513585076	0	0	0	0	1.81376069513352	1.07593735315205	0	0	0	0	1.31821006104027	0	0	2.60733178829351	1.55141957711566	1.69641216920991	0	1.88740912115649	1.53108459818759	1.97189696193637	0	0	0	0	0	0	2.14893933617676	0	1.99076229945814	2.22471274565542	2.97312237002494	0	0
Auts2	0	3.45626583841136	3.62495433136863	0	1.9607996208036	3.12304868192834	3.10231813251962	2.0752093313443	3.10557101987308	2.06372046693815	0	0	0	2.31574019311609	2.83660805251913	2.81729409483669	3.03269497873618	0	2.64996674108913	2.55787098350466	2.7973063758348	2.36684574406429	2.12520704909252	1.34549899220371	2.53698058623264	2.19900433308965	0	3.91904333904811	2.512152484619	4.24985827536774	2.97506089197832	3.99732170652884	2.93943188320704	2.87957606515677	3.40071417314828	3.24793615704216	3.47442691277978	1.74383018970019	3.35425633554896	1.67598354048649	2.84229485571925	2.25088926712533	2.14893933617676	2.30510898111946	1.99076229945814	2.86229517162776	3.36139270087774	2.26314385595782	2.58266956932763
Flt1	0	0	0	0	0	0	0	0	0	0	0	0	2.1065965598764	0	0	0	0	0	0	0	0	1.07593735315205	2.12520704909252	1.34549899220371	0	0	0	0	0	1.98532411759619	1.05050045916668	0	0	2.5018032443378	1.53108459818759	1.97189696193637	1.41777666095699	1.74383018970019	0	0	2.84229485571925	2.25088926712533	2.14893933617676	2.30510898111946	1.99076229945814	2.86229517162776	0	2.26314385595782	1.96237499240504
Cald1	0	0	1.53736192508292	1.91353563432951	1.9607996208036	2.47298278394242	2.62101564260524	0	2.72225819321283	2.69127221462781	0	2.29621992739132	2.1065965598764	0	3.04795749005055	0	0	2.81286777189737	2.38556280584336	1.93933903819439	0	1.07593735315205	2.12520704909252	2.51449854005196	2.91572351951435	1.61103983508343	3.00355599440811	0	3.16390797782261	0	2.13254695967852	1.69641216920991	1.70042526017336	1.88740912115649	2.10977392952907	0	0	1.74383018970019	0	1.67598354048649	2.2058037184276	0	0	2.94709552721833	3.4844829050749	0	0	0	0
Slc13a4	0	0	0	0	0	0	0	0	0	0	0	0	0	0	0	0	0	0	0	1.38054700437752	0	0	0	0	0	0	0	0	0	0	0	0	0	0	0	0	0	0	0	0	0	2.25088926712533	0	0	0	0	0	0	0
Jazf1	3.08808814761517	0	1.53736192508292	0	0	2.47298278394242	2.89034814709658	0	0	0	0	0	0	0	0	1.83159513585076	0	2.4369772841275	2.02508882896837	1.38054700437752	0	2.1668756163322	2.12520704909252	2.89262551971509	3.40464505983365	2.19900433308965	1.31821006104027	3.24556160483345	1.89697833179407	0	3.06571987848673	1.69641216920991	2.29782894816441	0	2.10977392952907	0	1.98181008988843	3.37810762098967	0	1.67598354048649	3.22813812817313	2.25088926712533	3.16662513452432	0	1.99076229945814	0	2.97312237002494	0	2.58266956932763
Tmem150a	0	0	0	0	0	0	1.65820783880945	0	0	0	0	0	0	0	0	0	0	0	0	0	0	0	0	0	0	1.61103983508343	0	0	0	0	0	0	0	0	0	0	0	0	0	0	0	0	0	0	0	0	0	2.26314385595782	0
Tcf7l1	0	0	0	2.90859484481995	2.5809750428345	1.86080059627647	0	2.70353520553434	0	2.90076407720547	3.05121366375915	2.29621992739132	2.73698960203957	2.95828168230784	1.61232414870373	2.44127489383508	0	0	2.85887879069998	1.38054700437752	0	2.1668756163322	0	1.34549899220371	0	2.83509769274711	2.48047245816107	3.46088532368559	3.37856355483282	0	0	2.66465747126812	2.29782894816441	3.1531190082218	2.10977392952907	0	0	1.74383018970019	2.06763174829063	3.57661709842463	0	2.25088926712533	0	0	0	2.22471274565542	2.32985368712411	0	1.96237499240504
Dysf	2.0767337617138	2.79417860972536	1.53736192508292	0	2.5809750428345	0	0	0	0	2.42593679707958	0	0	2.1065965598764	2.31574019311609	1.61232414870373	0	1.78141811543332	1.82764235530237	0	1.38054700437752	2.42187281397639	2.1668756163322	0	0	0	2.19900433308965	1.31821006104027	1.9697705634872	1.89697833179407	0	0	0	2.93943188320704	0	2.10977392952907	1.97189696193637	1.98181008988843	0	2.69544810697013	1.67598354048649	0	2.88994685880331	0	0	1.99076229945814	0	2.97312237002494	2.26314385595782	0
Gata2	0	2.16039887906589	1.53736192508292	0	0	0	0	0	0	0	0	0	0	0	0	0	1.78141811543332	0	0	0	0	1.07593735315205	2.12520704909252	0	0	1.61103983508343	1.86770977587311	0	0	0	0	0	0	0	0	0	0	0	0	1.67598354048649	0	0	0	0	0	2.22471274565542	2.32985368712411	0	0
Iqsec1	2.70516164150896	3.17904464145577	2.48130875585591	1.91353563432951	3.2355372264227	1.86080059627647	0	2.0752093313443	0	2.06372046693815	0	2.29621992739132	2.1065965598764	2.31574019311609	0	0	2.38660847126374	1.82764235530237	2.38556280584336	1.38054700437752	2.7973063758348	1.58216563210548	2.12520704909252	1.89914859896049	0	1.61103983508343	1.31821006104027	0	1.89697833179407	1.98532411759619	1.88361594048484	3.47135759925136	1.70042526017336	0	2.10977392952907	1.97189696193637	0	2.71850347605744	0	2.91105605595869	0	2.25088926712533	2.14893933617676	3.3349084325076	1.99076229945814	2.86229517162776	2.97312237002494	3.28988561019803	0
Frmd4b	0	0	0	0	0	0	0	0	0	0	0	0	0	2.95828168230784	0	0	1.78141811543332	1.82764235530237	0	0	0	1.58216563210548	0	0	0	1.61103983508343	0	0	0	0	2.33169797722837	0	0	0	0	0	0	0	0	0	2.2058037184276	0	0	0	0	0	0	0	1.96237499240504
Srgap3	2.0767337617138	2.16039887906589	1.53736192508292	0	0	0	1.65820783880945	0	0	0	0	0	0	2.31574019311609	1.61232414870373	1.83159513585076	1.78141811543332	0	1.45591183197954	1.38054700437752	2.42187281397639	0	3.41767832420624	0	1.91996529756053	2.19900433308965	1.31821006104027	2.59062182185687	1.89697833179407	1.98532411759619	2.33169797722837	0	1.70042526017336	1.88740912115649	2.74037240642779	0	3.13094156644315	2.98955466600737	2.69544810697013	1.67598354048649	0	3.27671181519971	0	0	2.61316976459608	0	2.32985368712411	3.96422802876736	0
Vgll4	0	0	0	0	0	2.47298278394242	1.65820783880945	0	0	1.49011536301151	0	0	0	0	0	0	0	0	0	2.29568429039192	0	0	0	0	1.91996529756053	0	0	0	0	0	1.05050045916668	0	0	0	1.53108459818759	0	1.41777666095699	0	0	0	0	0	0	0	0	2.22471274565542	0	2.90287816213688	0
Pparg	0	2.16039887906589	0	2.53004053634353	0	0	0	1.50031631752831	2.72225819321283	0	0	2.29621992739132	2.1065965598764	0	1.61232414870373	2.44127489383508	0	1.82764235530237	1.45591183197954	1.38054700437752	1.81376069513352	1.58216563210548	0	0	0	2.19900433308965	1.86770977587311	1.9697705634872	0	0	1.05050045916668	1.69641216920991	0	1.88740912115649	2.10977392952907	2.97312237002494	1.98181008988843	2.34549268838946	0	0	2.2058037184276	2.25088926712533	2.78201386269936	2.30510898111946	1.99076229945814	2.86229517162776	2.32985368712411	3.28988561019803	1.96237499240504
Adipor2	0	0	0	0	0	0	0	0	2.09276742391351	0	0	0	0	0	1.61232414870373	0	0	0	2.02508882896837	0	0	1.07593735315205	0	1.34549899220371	0	0	0	0	0	0	1.05050045916668	0	2.29782894816441	0	0	0	0	0	0	0	0	0	0	0	0	0	0	2.26314385595782	0
Lpcat3	0	0	1.53736192508292	0	1.9607996208036	0	0	1.50031631752831	0	0	0	0	2.1065965598764	0	0	0	0	0	0	0	0	1.07593735315205	0	1.89914859896049	1.91996529756053	0	1.31821006104027	0	0	0	1.05050045916668	0	2.29782894816441	0	0	0	0	0	0	1.67598354048649	0	0	0	0	0	2.22471274565542	0	0	0
Tspan9	0	0	2.11680980684066	0	1.9607996208036	0	0	0	0	0	0	0	0	2.31574019311609	0	0	0	1.82764235530237	0	0	0	1.07593735315205	3.14086644680827	1.34549899220371	0	0	1.31821006104027	0	0	0	1.05050045916668	0	0	2.5018032443378	1.53108459818759	1.97189696193637	2.98404396159402	0	0	1.67598354048649	0	2.25088926712533	0	0	0	2.86229517162776	0	0	1.96237499240504
Leng8	2.0767337617138	0	0	0	0	0	1.65820783880945	1.50031631752831	0	1.49011536301151	0	0	0	0	0	0	1.78141811543332	0	0	0	0	1.07593735315205	0	1.34549899220371	0	0	0	2.97077821408116	0	1.98532411759619	1.55141957711566	0	0	1.88740912115649	0	1.97189696193637	0	0	0	0	0	0	0	0	2.61316976459608	0	0	0	0
Peg3	0	2.16039887906589	1.53736192508292	3.18254498169763	0	0	0	0	0	0	1.79761673641301	0	2.1065965598764	2.31574019311609	2.56827889162845	1.83159513585076	1.78141811543332	1.82764235530237	0	0	0	1.58216563210548	2.75679354111974	3.47324280166051	0	0	2.68673356565757	0	3.16390797782261	1.98532411759619	1.05050045916668	1.69641216920991	1.70042526017336	1.88740912115649	2.10977392952907	2.59290746158095	0	2.34549268838946	2.06763174829063	0	2.2058037184276	3.27671181519971	0	2.30510898111946	0	2.22471274565542	0	2.26314385595782	2.58266956932763
Slc1a5	0	0	0	0	0	0	1.65820783880945	0	0	0	0	0	0	0	0	0	1.78141811543332	0	0	0	0	0	0	0	0	0	0	1.9697705634872	1.89697833179407	1.98532411759619	0	0	0	0	0	0	0	0	0	0	0	0	0	0	0	0	0	0	0
Sipa1l3	2.70516164150896	0	0	0	1.9607996208036	0	0	2.43793040895244	0	0	0	0	0	0	1.61232414870373	0	0	0	0	2.29568429039192	0	1.07593735315205	0	0	0	0	0	0	0	1.98532411759619	1.05050045916668	1.69641216920991	0	0	1.53108459818759	0	1.98181008988843	0	0	1.67598354048649	0	0	2.14893933617676	0	0	2.86229517162776	2.32985368712411	0	1.96237499240504
Igf1r	0	0	2.48130875585591	0	3.2355372264227	3.79393862143932	0	2.0752093313443	0	0	2.40428332153369	0	2.73698960203957	2.31574019311609	0	2.44127489383508	1.78141811543332	0	1.45591183197954	1.38054700437752	1.81376069513352	1.07593735315205	2.75679354111974	3.27944096983364	3.18977186678287	1.61103983508343	1.86770977587311	1.9697705634872	0	0	1.55141957711566	0	1.70042526017336	2.87957606515677	1.53108459818759	2.97312237002494	0	0	0	1.67598354048649	2.2058037184276	2.25088926712533	0	0	1.99076229945814	2.22471274565542	2.32985368712411	0	0
Iqgap1	0	2.16039887906589	2.11680980684066	0	0	1.86080059627647	3.10231813251962	0	2.09276742391351	0	0	2.29621992739132	0	0	0	0	2.38660847126374	1.82764235530237	0	1.38054700437752	1.81376069513352	1.58216563210548	2.12520704909252	1.89914859896049	2.53698058623264	1.61103983508343	0	1.9697705634872	2.89021436433324	0	1.55141957711566	0	2.29782894816441	0	0	0	1.98181008988843	0	2.06763174829063	2.27089805024348	2.2058037184276	0	0	0	0	2.22471274565542	2.32985368712411	2.26314385595782	2.58266956932763
Pde8a	0	0	0	0	0	0	2.25126943049447	0	2.09276742391351	0	0	0	0	0	0	0	1.78141811543332	0	1.45591183197954	0	0	0	2.12520704909252	2.25342706793153	0	2.56679750214283	0	2.59062182185687	0	1.98532411759619	1.55141957711566	0	0	0	0	0	0	0	0	0	0	0	0	0	0	0	2.32985368712411	0	0
Gab2	0	0	2.48130875585591	2.90859484481995	2.5809750428345	3.33734869371362	1.65820783880945	2.0752093313443	2.09276742391351	2.69127221462781	2.40428332153369	0	2.1065965598764	3.34629267128739	1.61232414870373	3.30392232921793	1.78141811543332	3.29938734827684	3.42085384752277	0	0	2.91206071148866	3.63424258521063	2.72132906007639	1.91996529756053	3.49844895623993	2.48047245816107	2.97077821408116	0	3.26291675365922	2.76459768562531	3.32237268963953	0	2.87957606515677	2.47397757925581	1.97189696193637	2.81178913370242	3.52737325317357	2.06763174829063	1.67598354048649	2.84229485571925	2.88994685880331	3.44371490765316	3.3349084325076	3.26897751197573	0	2.32985368712411	2.90287816213688	2.96262129824963
Fam168a	0	3.45626583841136	3.13173959779812	0	0	1.86080059627647	2.25126943049447	1.50031631752831	2.09276742391351	3.46381113997815	0	2.29621992739132	2.1065965598764	2.95828168230784	1.61232414870373	2.44127489383508	2.7609471472243	0	1.45591183197954	2.76539935017192	0	2.36684574406429	2.75679354111974	2.25342706793153	3.40464505983365	2.56679750214283	2.48047245816107	2.59062182185687	2.512152484619	3.47837553428589	2.64002623834155	0	2.66922809545352	1.88740912115649	2.74037240642779	3.46327849499773	2.60355817831654	1.74383018970019	0	2.27089805024348	0	2.88994685880331	2.14893933617676	2.30510898111946	0	2.22471274565542	2.97312237002494	2.26314385595782	2.96262129824963
Galnt18	0	0	0	0	0	0	0	0	0	0	0	0	0	0	0	0	0	1.82764235530237	0	0	0	0	0	0	0	0	0	0	0	0	0	0	0	0	0	1.97189696193637	1.41777666095699	0	2.06763174829063	0	0	0	0	0	0	0	0	0	0
Tead1	0	0	0	0	2.96088294434551	0	0	0	0	0	0	0	2.1065965598764	0	0	0	0	0	0	0	0	1.07593735315205	0	0	0	0	0	0	0	1.98532411759619	1.55141957711566	1.69641216920991	0	0	1.53108459818759	0	0	1.74383018970019	0	0	2.2058037184276	0	3.16662513452432	0	0	0	0	2.26314385595782	1.96237499240504
Plekha7	0	2.16039887906589	2.11680980684066	2.53004053634353	0	3.33734869371362	3.10231813251962	2.43793040895244	0	2.42593679707958	0	2.29621992739132	2.73698960203957	0	0	1.83159513585076	0	1.82764235530237	3.03159889967274	1.38054700437752	2.42187281397639	2.1668756163322	0	2.51449854005196	1.91996529756053	1.61103983508343	2.48047245816107	0	1.89697833179407	2.60733178829351	1.55141957711566	2.29341174306379	1.70042526017336	2.5018032443378	2.74037240642779	3.24793615704216	0	2.34549268838946	3.35425633554896	2.27089805024348	2.84229485571925	0	2.14893933617676	0	0	2.22471274565542	2.32985368712411	2.90287816213688	2.96262129824963
Tacc2	0	0	1.53736192508292	1.91353563432951	1.9607996208036	0	1.65820783880945	0	0	0	0	0	0	0	2.20043099290899	0	0	2.4369772841275	0	1.38054700437752	0	1.58216563210548	0	0	2.53698058623264	1.61103983508343	0	0	0	1.98532411759619	1.05050045916668	1.69641216920991	1.70042526017336	2.5018032443378	0	1.97189696193637	1.41777666095699	0	0	0	2.2058037184276	0	0	0	0	2.86229517162776	0	0	1.96237499240504
Gm4593	0	0	0	0	0	0	0	0	0	0	0	0	0	0	0	0	0	0	0	0	0	0	0	0	0	0	0	0	0	0	0	0	0	0	0	0	0	0	0	0	0	0	0	0	0	0	0	0	0
Dock1	2.0767337617138	0	2.48130875585591	0	0	2.47298278394242	0	0	2.09276742391351	1.49011536301151	0	2.29621992739132	0	2.31574019311609	0	1.83159513585076	0	0	2.85887879069998	1.93933903819439	2.42187281397639	2.80105013918008	0	2.72132906007639	3.40464505983365	2.83509769274711	2.85763970874937	2.97077821408116	0	1.98532411759619	2.87535594514573	0	0	1.88740912115649	2.47397757925581	1.97189696193637	3.25899841940706	1.74383018970019	2.06763174829063	2.27089805024348	0	2.25088926712533	0	0	1.99076229945814	0	2.97312237002494	2.26314385595782	2.58266956932763
Eps8l2	0	0	1.53736192508292	2.53004053634353	0	1.86080059627647	1.65820783880945	0	2.09276742391351	0	0	0	2.73698960203957	0	0	1.83159513585076	0	1.82764235530237	2.02508882896837	0	0	2.1668756163322	3.14086644680827	0	0	0	1.86770977587311	1.9697705634872	1.89697833179407	1.98532411759619	2.13254695967852	3.14723867129186	1.70042526017336	0	1.53108459818759	1.97189696193637	2.34024664031611	2.34549268838946	0	1.67598354048649	2.2058037184276	0	3.16662513452432	0	2.99389746869899	2.86229517162776	3.36139270087774	2.26314385595782	0
Ap2a2	0	2.16039887906589	1.53736192508292	0	1.9607996208036	0	0	0	0	0	0	0	0	0	0	0	0	0	0	1.38054700437752	0	0	0	0	0	2.19900433308965	0	0	1.89697833179407	0	1.55141957711566	1.69641216920991	1.70042526017336	0	0	0	1.98181008988843	0	0	0	0	0	0	0	0	0	0	0	0
Mthfd1l	0	2.79417860972536	1.53736192508292	0	0	2.47298278394242	2.25126943049447	2.0752093313443	0	2.06372046693815	1.79761673641301	2.29621992739132	2.73698960203957	0	0	0	1.78141811543332	3.29938734827684	2.02508882896837	1.38054700437752	2.42187281397639	2.1668756163322	0	2.25342706793153	2.53698058623264	0	2.22030946179844	1.9697705634872	1.89697833179407	1.98532411759619	1.55141957711566	1.69641216920991	0	0	2.47397757925581	0	1.41777666095699	1.74383018970019	0	0	0	0	2.14893933617676	0	2.99389746869899	0	0	0	0
Utrn	0	0	2.11680980684066	0	2.5809750428345	1.86080059627647	2.25126943049447	2.43793040895244	0	1.49011536301151	0	2.29621992739132	0	0	1.61232414870373	2.44127489383508	0	0	2.02508882896837	2.29568429039192	0	2.53341453263154	0	2.25342706793153	1.91996529756053	2.56679750214283	1.31821006104027	3.24556160483345	0	1.98532411759619	1.05050045916668	0	1.70042526017336	2.87957606515677	0	0	2.98404396159402	1.74383018970019	0	2.64135083751663	2.84229485571925	2.25088926712533	0	0	2.61316976459608	0	2.32985368712411	2.90287816213688	1.96237499240504
Nhsl1	3.58050984095257	3.45626583841136	1.53736192508292	3.39735793877698	1.9607996208036	2.8499342352407	2.62101564260524	2.70353520553434	0	0	2.40428332153369	0	2.73698960203957	0	2.20043099290899	0	1.78141811543332	2.4369772841275	3.61556417606796	1.93933903819439	1.81376069513352	2.36684574406429	2.12520704909252	2.25342706793153	0	0	1.31821006104027	2.59062182185687	3.16390797782261	3.80599224845837	3.29684164221648	0	0	0	2.74037240642779	3.24793615704216	1.41777666095699	2.34549268838946	3.57038829486904	1.67598354048649	0	2.88994685880331	0	2.94709552721833	3.66167975070079	2.22471274565542	0	0	0
Map7	0	0	0	0	0	0	0	0	0	0	0	0	2.1065965598764	0	1.61232414870373	0	0	0	0	1.38054700437752	0	0	0	0	0	1.61103983508343	0	0	0	0	1.55141957711566	0	1.70042526017336	1.88740912115649	1.53108459818759	0	0	1.74383018970019	0	1.67598354048649	0	2.25088926712533	2.14893933617676	0	0	0	0	0	0
Nkain2	0	0	0	0	0	0	0	0	0	0	0	0	0	0	0	1.83159513585076	0	0	0	0	0	0	0	0	0	0	0	0	0	0	0	0	1.70042526017336	0	0	1.97189696193637	0	1.74383018970019	0	0	0	0	0	0	0	0	0	0	0
Slc16a10	0	0	0	0	0	0	0	0	0	0	0	0	0	0	0	0	0	0	0	0	0	0	0	0	0	2.19900433308965	0	1.9697705634872	0	0	0	0	0	1.88740912115649	0	0	0	0	0	0	0	0	0	0	0	0	0	0	1.96237499240504
Frs2	2.0767337617138	0	1.53736192508292	1.91353563432951	0	1.86080059627647	0	1.50031631752831	2.09276742391351	0	0	0	0	0	1.61232414870373	1.83159513585076	0	0	0	0	1.81376069513352	1.91666108955033	0	0	0	0	0	0	1.89697833179407	0	0	0	1.70042526017336	1.88740912115649	0	0	0	0	0	0	0	2.25088926712533	0	0	0	0	0	0	1.96237499240504
Grip1	3.08808814761517	0	1.53736192508292	0	0	0	0	0	0	0	0	0	2.1065965598764	0	1.61232414870373	2.81729409483669	0	0	0	0	0	1.07593735315205	0	1.34549899220371	0	0	0	1.9697705634872	0	0	1.05050045916668	0	0	1.88740912115649	0	0	1.98181008988843	0	0	0	0	0	2.78201386269936	0	0	0	0	0	0
Arhgef18	2.0767337617138	0	2.11680980684066	0	1.9607996208036	0	0	1.50031631752831	0	1.49011536301151	0	0	0	0	0	0	1.78141811543332	0	0	1.93933903819439	0	1.58216563210548	0	0	0	0	1.86770977587311	0	1.89697833179407	0	0	0	0	0	0	1.97189696193637	0	0	0	0	2.2058037184276	2.88994685880331	0	2.94709552721833	0	0	0	0	0
Mcph1	2.70516164150896	2.16039887906589	1.53736192508292	0	2.96088294434551	2.47298278394242	0	2.70353520553434	2.09276742391351	2.06372046693815	2.7791757414457	2.29621992739132	0	0	2.83660805251913	0	1.78141811543332	2.4369772841275	0	1.93933903819439	0	1.91666108955033	2.12520704909252	2.25342706793153	0	1.61103983508343	0	1.9697705634872	0	0	1.55141957711566	0	0	1.88740912115649	2.47397757925581	0	1.41777666095699	0	0	2.27089805024348	2.2058037184276	0	2.78201386269936	0	1.99076229945814	2.22471274565542	2.32985368712411	0	2.58266956932763
Tacc1	0	0	0	0	0	1.86080059627647	0	0	0	1.49011536301151	0	0	0	0	0	0	2.38660847126374	0	1.45591183197954	0	0	0	2.75679354111974	0	0	0	1.31821006104027	0	1.89697833179407	0	0	1.69641216920991	1.70042526017336	0	0	0	1.41777666095699	0	0	1.67598354048649	2.2058037184276	0	0	0	0	0	0	0	0
Dlc1	2.0767337617138	0	1.53736192508292	1.91353563432951	0	2.8499342352407	1.65820783880945	0	0	2.90076407720547	0	2.29621992739132	0	0	2.20043099290899	3.08992155079524	0	2.4369772841275	0	2.29568429039192	2.42187281397639	1.58216563210548	3.14086644680827	2.25342706793153	2.91572351951435	2.19900433308965	2.48047245816107	1.9697705634872	3.16390797782261	3.26291675365922	1.55141957711566	1.69641216920991	0	2.5018032443378	2.74037240642779	0	2.98404396159402	0	0	0	2.2058037184276	2.25088926712533	2.14893933617676	0	0	0	0	2.26314385595782	2.58266956932763
Slc7a2	0	0	0	0	0	0	0	0	0	0	0	0	0	0	0	0	0	1.82764235530237	0	0	0	0	0	0	0	1.61103983508343	0	0	0	0	1.05050045916668	0	0	0	0	0	0	0	0	0	0	0	0	0	0	0	0	0	0
Mtus1	0	0	0	0	0	0	0	0	0	0	0	0	0	0	0	0	0	0	0	0	0	1.07593735315205	0	0	1.91996529756053	0	0	0	0	0	0	1.69641216920991	0	0	0	0	0	0	0	0	0	0	0	0	0	0	0	0	0
Wwc2	0	0	1.53736192508292	2.90859484481995	2.5809750428345	0	0	2.43793040895244	2.72225819321283	0	2.40428332153369	0	2.73698960203957	0	2.56827889162845	0	1.78141811543332	0	1.45591183197954	1.38054700437752	0	0	0	2.25342706793153	2.53698058623264	0	2.48047245816107	2.59062182185687	1.89697833179407	0	2.13254695967852	0	0	0	0	0	2.60355817831654	2.34549268838946	0	1.67598354048649	0	0	2.14893933617676	0	1.99076229945814	0	2.32985368712411	0	0
Adcy7	0	0	1.53736192508292	2.53004053634353	2.5809750428345	2.47298278394242	1.65820783880945	1.50031631752831	2.09276742391351	0	1.79761673641301	0	0	2.31574019311609	1.61232414870373	0	0	1.82764235530237	1.45591183197954	2.29568429039192	0	2.53341453263154	2.12520704909252	3.38102945050211	1.91996529756053	2.19900433308965	2.48047245816107	0	1.89697833179407	0	1.88361594048484	2.66465747126812	1.70042526017336	0	2.47397757925581	0	2.60355817831654	2.34549268838946	2.69544810697013	0	0	2.25088926712533	2.14893933617676	2.94709552721833	1.99076229945814	0	0	2.26314385595782	0
Cdh1	0	0	0	0	1.9607996208036	2.8499342352407	0	0	0	0	2.40428332153369	0	0	2.31574019311609	0	1.83159513585076	0	0	0	0	1.81376069513352	1.58216563210548	0	0	0	1.61103983508343	0	1.9697705634872	2.512152484619	2.98791283656216	1.55141957711566	0	0	0	0	0	0	2.71850347605744	0	0	0	0	2.78201386269936	0	0	0	0	0	0
Nfat5	0	0	0	0	2.5809750428345	0	1.65820783880945	0	0	0	1.79761673641301	2.29621992739132	2.1065965598764	2.31574019311609	2.20043099290899	0	1.78141811543332	1.82764235530237	1.45591183197954	0	1.81376069513352	1.91666108955033	0	0	0	2.56679750214283	0	0	1.89697833179407	0	0	0	1.70042526017336	1.88740912115649	1.53108459818759	0	1.41777666095699	0	2.69544810697013	2.27089805024348	0	0	2.78201386269936	0	0	0	0	0	1.96237499240504
Zfhx3	0	0	0	0	1.9607996208036	0	2.25126943049447	0	3.10557101987308	1.49011536301151	0	0	0	0	0	1.83159513585076	1.78141811543332	0	0	0	0	1.58216563210548	2.12520704909252	1.89914859896049	0	1.61103983508343	0	0	2.89021436433324	0	1.55141957711566	1.69641216920991	0	0	1.53108459818759	0	0	0	0	0	0	0	0	0	1.99076229945814	2.22471274565542	0	0	0
Zcchc14	2.0767337617138	0	0	0	0	0	0	1.50031631752831	0	2.06372046693815	0	0	0	0	0	0	1.78141811543332	0	1.45591183197954	0	1.81376069513352	1.91666108955033	0	0	1.91996529756053	0	1.31821006104027	0	1.89697833179407	0	1.05050045916668	0	0	0	0	0	0	1.74383018970019	0	0	0	0	0	0	0	0	0	0	0
Flnb	0	3.17904464145577	3.13173959779812	2.90859484481995	3.45078185013063	3.66361732541697	1.65820783880945	1.50031631752831	0	2.42593679707958	2.7791757414457	2.29621992739132	0	2.95828168230784	2.83660805251913	0	2.38660847126374	0	0	1.93933903819439	3.73928169454661	2.53341453263154	2.12520704909252	2.89262551971509	3.58141479900086	2.19900433308965	3.24378468224852	1.9697705634872	1.89697833179407	1.98532411759619	2.33169797722837	2.93478048241059	3.72053512549645	3.1531190082218	3.27193567392086	3.24793615704216	2.34024664031611	1.74383018970019	3.57038829486904	2.64135083751663	3.90127073760057	2.25088926712533	3.66044880314916	0	4.25606987727048	3.24853074860739	3.36139270087774	2.90287816213688	3.23729835533857
Ube2e2	0	0	1.53736192508292	0	0	0	2.25126943049447	1.50031631752831	0	0	2.40428332153369	0	2.1065965598764	2.31574019311609	1.61232414870373	0	0	0	0	1.38054700437752	0	1.07593735315205	0	0	0	0	0	0	0	0	0	2.29341174306379	1.70042526017336	0	2.10977392952907	0	0	0	0	0	0	0	0	0	2.61316976459608	2.22471274565542	2.32985368712411	0	1.96237499240504
Zmiz1	0	0	0	0	0	0	1.65820783880945	1.50031631752831	0	0	0	0	0	0	0	1.83159513585076	1.78141811543332	1.82764235530237	0	1.38054700437752	0	1.07593735315205	0	0	0	0	1.31821006104027	0	0	0	1.55141957711566	1.69641216920991	0	1.88740912115649	0	0	1.41777666095699	0	0	1.67598354048649	2.2058037184276	0	0	0	0	2.22471274565542	0	0	0
Arf4	0	2.16039887906589	0	0	0	1.86080059627647	1.65820783880945	2.0752093313443	0	0	0	0	0	0	0	0	0	0	0	1.38054700437752	1.81376069513352	0	0	0	0	0	0	0	1.89697833179407	0	0	0	1.70042526017336	0	0	1.97189696193637	0	1.74383018970019	0	0	2.2058037184276	0	0	2.94709552721833	0	0	0	0	0
Nisch	0	0	1.53736192508292	0	0	1.86080059627647	1.65820783880945	2.0752093313443	0	0	2.40428332153369	0	0	2.31574019311609	1.61232414870373	0	2.38660847126374	0	0	1.38054700437752	0	1.58216563210548	2.12520704909252	1.89914859896049	0	2.56679750214283	1.86770977587311	0	0	2.60733178829351	0	1.69641216920991	0	0	1.53108459818759	1.97189696193637	1.41777666095699	1.74383018970019	2.06763174829063	2.27089805024348	0	2.88994685880331	0	0	0	0	0	0	0
Ktn1	0	0	0	0	0	0	1.65820783880945	0	0	0	0	2.29621992739132	0	0	0	0	0	0	0	0	0	1.07593735315205	0	1.34549899220371	0	1.61103983508343	1.31821006104027	0	0	0	1.88361594048484	1.69641216920991	0	0	0	0	0	0	0	1.67598354048649	0	2.25088926712533	0	2.94709552721833	0	2.22471274565542	0	0	0
Elf1	0	0	0	0	2.5809750428345	0	0	1.50031631752831	0	0	0	0	0	2.31574019311609	0	0	0	0	0	0	0	1.07593735315205	0	1.34549899220371	0	1.61103983508343	0	0	0	0	1.55141957711566	0	0	0	0	0	0	2.34549268838946	2.06763174829063	0	0	0	2.78201386269936	2.30510898111946	1.99076229945814	2.86229517162776	2.32985368712411	0	0
Diaph3	2.70516164150896	3.17904464145577	1.53736192508292	0	1.9607996208036	2.8499342352407	2.25126943049447	3.7564746233906	2.72225819321283	2.90076407720547	2.7791757414457	0	3.12062993213019	2.95828168230784	2.83660805251913	2.81729409483669	3.2461546717212	3.29938734827684	2.64996674108913	2.93717365392318	2.7973063758348	1.91666108955033	2.12520704909252	2.25342706793153	2.53698058623264	2.19900433308965	1.86770977587311	1.9697705634872	0	2.98791283656216	1.55141957711566	1.69641216920991	1.70042526017336	1.88740912115649	2.74037240642779	0	1.98181008988843	0	0	1.67598354048649	2.84229485571925	2.25088926712533	0	0	2.61316976459608	0	2.32985368712411	0	0
Mycbp2	0	2.79417860972536	1.53736192508292	0	2.5809750428345	0	0	1.50031631752831	2.09276742391351	1.49011536301151	0	2.29621992739132	0	0	2.56827889162845	2.44127489383508	0	2.4369772841275	0	1.38054700437752	0	0	0	1.34549899220371	0	2.56679750214283	1.31821006104027	2.59062182185687	1.89697833179407	2.98791283656216	1.55141957711566	1.69641216920991	0	1.88740912115649	2.10977392952907	0	2.60355817831654	1.74383018970019	2.69544810697013	1.67598354048649	0	2.25088926712533	0	2.30510898111946	0	0	0	0	2.58266956932763
Farp1	2.0767337617138	3.17904464145577	2.11680980684066	0	1.9607996208036	0	0	2.0752093313443	0	0	1.79761673641301	2.29621992739132	0	2.31574019311609	0	1.83159513585076	1.78141811543332	2.81286777189737	0	1.38054700437752	0	1.91666108955033	0	1.89914859896049	0	0	0	0	2.512152484619	0	1.88361594048484	0	2.66922809545352	2.5018032443378	2.10977392952907	1.97189696193637	2.34024664031611	0	0	2.64135083751663	0	0	0	0	1.99076229945814	0	2.32985368712411	0	0
Clybl	0	0	1.53736192508292	0	0	0	0	1.50031631752831	0	1.49011536301151	2.7791757414457	0	0	0	0	1.83159513585076	0	0	1.45591183197954	1.38054700437752	0	1.07593735315205	0	1.34549899220371	0	0	1.31821006104027	0	0	2.60733178829351	0	0	0	0	1.53108459818759	0	1.41777666095699	0	2.06763174829063	1.67598354048649	0	2.88994685880331	0	0	1.99076229945814	0	0	0	0
Aplp2	0	0	0	0	1.9607996208036	1.86080059627647	0	0	2.09276742391351	0	0	0	0	0	1.61232414870373	0	0	0	0	0	1.81376069513352	0	0	0	0	0	1.31821006104027	0	1.89697833179407	1.98532411759619	1.05050045916668	0	2.29782894816441	0	1.53108459818759	0	0	0	0	0	0	0	2.14893933617676	0	0	0	0	0	0
Uaca	0	0	0	0	0	0	0	0	0	1.49011536301151	0	2.29621992739132	0	0	0	1.83159513585076	0	1.82764235530237	0	0	0	1.91666108955033	0	1.89914859896049	0	1.61103983508343	1.31821006104027	0	0	0	2.13254695967852	1.69641216920991	0	1.88740912115649	0	1.97189696193637	1.41777666095699	0	0	1.67598354048649	2.2058037184276	0	3.66044880314916	2.30510898111946	1.99076229945814	0	0	0	1.96237499240504
Lrrc1	0	0	1.53736192508292	0	0	0	0	0	0	0	0	0	2.1065965598764	2.31574019311609	2.20043099290899	0	0	0	0	0	0	0	2.12520704909252	1.34549899220371	0	0	1.31821006104027	0	1.89697833179407	0	0	0	0	0	1.53108459818759	0	0	0	0	0	0	0	2.14893933617676	0	0	0	0	0	0
Ctdspl	2.0767337617138	2.16039887906589	1.53736192508292	0	0	3.12304868192834	0	3.08642460696699	3.38199017053185	2.06372046693815	1.79761673641301	0	0	2.31574019311609	2.83660805251913	2.81729409483669	2.38660847126374	0	2.38556280584336	1.38054700437752	2.42187281397639	2.53341453263154	3.14086644680827	1.89914859896049	1.91996529756053	1.61103983508343	2.48047245816107	2.59062182185687	0	3.26291675365922	2.87535594514573	2.93478048241059	2.66922809545352	2.87957606515677	2.74037240642779	2.97312237002494	1.98181008988843	2.98955466600737	0	2.91105605595869	2.84229485571925	2.25088926712533	3.16662513452432	3.83138445240398	3.4844829050749	3.24853074860739	2.97312237002494	3.56820950338742	0
Ctnnb1	0	0	0	0	0	0	0	0	2.09276742391351	1.49011536301151	1.79761673641301	2.29621992739132	0	2.95828168230784	0	0	0	0	1.45591183197954	0	1.81376069513352	1.07593735315205	0	0	0	0	0	0	0	1.98532411759619	1.05050045916668	0	0	0	0	1.97189696193637	1.41777666095699	0	0	2.27089805024348	2.2058037184276	2.25088926712533	2.14893933617676	0	0	0	2.32985368712411	0	1.96237499240504
Limd1	0	0	0	2.53004053634353	0	0	0	0	0	0	0	0	0	0	0	0	1.78141811543332	0	1.45591183197954	1.38054700437752	0	1.07593735315205	0	1.34549899220371	0	0	0	0	0	1.98532411759619	0	1.69641216920991	1.70042526017336	0	0	0	1.41777666095699	0	0	0	0	0	2.14893933617676	2.30510898111946	0	0	0	0	0
Limk2	0	0	0	0	2.5809750428345	0	0	2.43793040895244	0	1.49011536301151	1.79761673641301	0	0	0	0	2.81729409483669	1.78141811543332	1.82764235530237	0	1.38054700437752	1.81376069513352	1.07593735315205	0	0	0	1.61103983508343	1.31821006104027	0	0	0	0	2.29341174306379	0	0	1.53108459818759	1.97189696193637	1.41777666095699	2.71850347605744	3.07815209415603	1.67598354048649	0	2.25088926712533	0	0	2.61316976459608	0	0	0	0
Grb10	0	2.16039887906589	0	1.91353563432951	2.5809750428345	2.47298278394242	0	1.50031631752831	2.09276742391351	0	0	0	2.1065965598764	0	0	0	0	0	0	0	0	0	0	1.34549899220371	0	0	1.31821006104027	0	0	0	0	0	0	0	1.53108459818759	0	1.41777666095699	0	2.06763174829063	0	0	0	0	0	2.61316976459608	0	0	2.26314385595782	0
Sptbn1	0	0	0	0	1.9607996208036	1.86080059627647	1.65820783880945	0	0	2.06372046693815	1.79761673641301	0	2.1065965598764	0	0	1.83159513585076	0	0	0	2.29568429039192	2.42187281397639	1.07593735315205	0	0	0	1.61103983508343	0	1.9697705634872	1.89697833179407	0	1.55141957711566	2.29341174306379	1.70042526017336	0	1.53108459818759	1.97189696193637	1.41777666095699	1.74383018970019	0	0	2.2058037184276	0	2.14893933617676	0	0	2.22471274565542	2.32985368712411	2.26314385595782	2.58266956932763
Ranbp17	3.58050984095257	0	2.48130875585591	2.53004053634353	1.9607996208036	0	1.65820783880945	2.0752093313443	3.10557101987308	2.06372046693815	2.40428332153369	0	2.73698960203957	2.31574019311609	1.61232414870373	1.83159513585076	1.78141811543332	3.47553894816296	0	2.29568429039192	0	2.1668756163322	2.12520704909252	1.89914859896049	0	0	1.31821006104027	0	0	1.98532411759619	1.55141957711566	0	1.70042526017336	1.88740912115649	2.47397757925581	0	1.41777666095699	0	0	0	0	2.88994685880331	0	2.30510898111946	0	0	0	0	1.96237499240504
Wwc1	0	0	0	0	3.45078185013063	0	0	0	0	0	0	0	0	0	0	1.83159513585076	0	0	0	0	0	1.07593735315205	0	1.34549899220371	0	0	0	1.9697705634872	2.512152484619	0	1.88361594048484	0	0	0	1.53108459818759	0	0	1.74383018970019	0	0	0	2.25088926712533	2.14893933617676	0	2.99389746869899	2.22471274565542	0	0	0
Epn2	2.70516164150896	0	0	0	0	1.86080059627647	1.65820783880945	1.50031631752831	0	0	0	0	0	0	0	0	0	0	0	1.38054700437752	0	0	0	1.34549899220371	0	0	0	0	1.89697833179407	0	1.05050045916668	0	1.70042526017336	0	0	0	0	1.74383018970019	0	0	0	0	2.14893933617676	2.30510898111946	0	0	0	0	0
Arhgap44	0	0	0	0	0	0	0	0	0	0	0	0	0	0	0	0	0	0	0	0	1.81376069513352	0	0	0	0	0	0	0	0	0	0	0	0	0	0	0	0	0	0	0	0	2.25088926712533	0	0	0	0	0	0	1.96237499240504
Nlk	2.0767337617138	0	2.11680980684066	1.91353563432951	0	2.47298278394242	0	1.50031631752831	2.09276742391351	0	0	0	0	0	0	1.83159513585076	1.78141811543332	0	2.02508882896837	1.38054700437752	2.42187281397639	1.91666108955033	2.12520704909252	0	1.91996529756053	1.61103983508343	1.31821006104027	0	1.89697833179407	0	1.55141957711566	2.29341174306379	0	1.88740912115649	0	0	0	1.74383018970019	0	0	2.2058037184276	0	0	0	1.99076229945814	2.22471274565542	2.32985368712411	0	0
Myo1d	0	2.16039887906589	2.11680980684066	1.91353563432951	1.9607996208036	0	1.65820783880945	0	0	0	0	0	0	0	1.61232414870373	0	3.2461546717212	0	0	0	0	2.67615934272763	0	2.25342706793153	1.91996529756053	0	1.31821006104027	0	1.89697833179407	1.98532411759619	0	1.69641216920991	2.29782894816441	0	2.10977392952907	1.97189696193637	1.98181008988843	2.34549268838946	0	1.67598354048649	0	0	2.78201386269936	2.30510898111946	1.99076229945814	2.22471274565542	0	0	2.96262129824963
Car4	0	0	0	0	0	0	0	0	0	0	0	0	0	0	0	0	0	0	0	0	1.81376069513352	0	0	0	0	0	0	0	0	0	0	0	0	0	0	0	0	0	0	0	0	0	0	0	0	0	0	0	0
Usp32	2.0767337617138	2.16039887906589	1.53736192508292	0	0	1.86080059627647	0	2.0752093313443	0	0	0	0	0	0	0	2.44127489383508	0	1.82764235530237	1.45591183197954	1.38054700437752	0	1.07593735315205	0	0	1.91996529756053	0	0	0	0	0	0	0	1.70042526017336	0	2.10977392952907	0	1.41777666095699	0	0	0	0	0	0	0	0	0	0	0	0
Top2a	0	2.79417860972536	2.11680980684066	0	2.5809750428345	0	0	1.50031631752831	2.09276742391351	2.42593679707958	1.79761673641301	0	2.1065965598764	2.31574019311609	2.56827889162845	1.83159513585076	0	0	1.45591183197954	0	1.81376069513352	1.07593735315205	2.12520704909252	0	0	1.61103983508343	2.22030946179844	0	0	0	0	1.69641216920991	2.29782894816441	1.88740912115649	0	2.97312237002494	1.41777666095699	2.34549268838946	0	0	0	0	0	0	0	0	0	0	0
Helz	0	3.17904464145577	1.53736192508292	0	0	0	1.65820783880945	0	0	2.69127221462781	1.79761673641301	2.29621992739132	0	2.95828168230784	2.20043099290899	0	0	0	1.45591183197954	0	2.42187281397639	2.36684574406429	2.12520704909252	1.89914859896049	0	1.61103983508343	1.86770977587311	2.59062182185687	2.512152484619	0	2.49769862269068	2.29341174306379	1.70042526017336	0	2.74037240642779	0	0	1.74383018970019	0	2.27089805024348	2.2058037184276	0	0	2.94709552721833	2.61316976459608	0	0	2.26314385595782	2.96262129824963
Sdk2	2.0767337617138	0	0	0	0	0	0	0	0	0	0	0	0	0	0	0	1.78141811543332	1.82764235530237	0	0	0	1.91666108955033	0	0	0	2.83509769274711	1.86770977587311	1.9697705634872	1.89697833179407	1.98532411759619	2.13254695967852	1.69641216920991	0	0	2.10977392952907	0	0	0	0	0	0	0	0	0	0	0	0	0	0
Gcgr	0	0	0	0	0	0	1.65820783880945	0	0	0	0	0	0	0	0	0	0	0	0	0	0	0	0	0	0	0	0	0	0	0	0	0	0	0	0	0	0	0	0	0	0	0	0	0	0	0	0	0	0
Dip2c	0	0	1.53736192508292	0	2.5809750428345	1.86080059627647	0	3.23403035351758	0	1.49011536301151	0	0	0	0	2.20043099290899	3.08992155079524	0	2.81286777189737	2.38556280584336	2.29568429039192	3.06962755075182	1.91666108955033	2.12520704909252	0	1.91996529756053	1.61103983508343	1.31821006104027	1.9697705634872	0	1.98532411759619	2.13254695967852	2.66465747126812	2.29782894816441	2.5018032443378	2.95052264812006	3.24793615704216	2.34024664031611	1.74383018970019	0	0	2.2058037184276	0	2.14893933617676	0	2.61316976459608	2.22471274565542	0	2.26314385595782	1.96237499240504
Carmil1	2.0767337617138	0	1.53736192508292	1.91353563432951	0	2.47298278394242	2.62101564260524	1.50031631752831	0	0	0	0	0	0	1.61232414870373	1.83159513585076	0	0	1.45591183197954	1.93933903819439	0	0	0	2.51449854005196	0	0	2.22030946179844	0	0	2.60733178829351	2.49769862269068	0	2.29782894816441	2.87957606515677	2.10977392952907	1.97189696193637	0	2.71850347605744	3.74800799473286	1.67598354048649	2.2058037184276	2.25088926712533	2.14893933617676	0	2.61316976459608	2.22471274565542	2.97312237002494	2.26314385595782	1.96237499240504
E2f3	0	0	1.53736192508292	1.91353563432951	0	0	1.65820783880945	1.50031631752831	0	1.49011536301151	2.7791757414457	0	0	2.31574019311609	1.61232414870373	1.83159513585076	1.78141811543332	1.82764235530237	0	0	1.81376069513352	1.58216563210548	0	1.34549899220371	1.91996529756053	0	2.48047245816107	1.9697705634872	1.89697833179407	1.98532411759619	2.49769862269068	0	1.70042526017336	1.88740912115649	1.53108459818759	1.97189696193637	0	3.20258528629371	0	1.67598354048649	2.2058037184276	0	0	0	1.99076229945814	0	2.32985368712411	0	1.96237499240504
Slc22a23	0	0	0	0	0	0	0	0	0	0	1.79761673641301	0	0	0	0	0	0	1.82764235530237	0	0	0	0	0	0	0	0	0	0	0	2.60733178829351	0	0	0	0	1.53108459818759	0	0	0	0	0	0	2.25088926712533	0	0	0	0	0	0	0
Rreb1	0	2.79417860972536	0	2.53004053634353	1.9607996208036	2.47298278394242	3.10231813251962	1.50031631752831	2.72225819321283	2.06372046693815	0	0	2.1065965598764	2.31574019311609	0	2.81729409483669	2.38660847126374	0	2.38556280584336	1.38054700437752	3.2834400130275	1.58216563210548	2.12520704909252	2.89262551971509	0	1.61103983508343	2.68673356565757	1.9697705634872	0	0	1.55141957711566	2.66465747126812	1.70042526017336	1.88740912115649	1.53108459818759	0	2.60355817831654	0	2.06763174829063	3.57661709842463	0	2.25088926712533	2.14893933617676	2.30510898111946	1.99076229945814	2.22471274565542	0	0	0
Atxn1	0	0	0	0	2.5809750428345	0	0	0	0	0	0	0	0	0	0	0	0	0	0	1.38054700437752	0	0	0	1.89914859896049	0	0	0	0	0	0	0	0	0	0	0	0	1.41777666095699	0	0	2.27089805024348	0	0	0	0	0	0	0	0	1.96237499240504
Wnk2	0	0	0	0	0	0	2.62101564260524	1.50031631752831	0	0	0	0	0	0	0	0	0	0	2.02508882896837	1.38054700437752	0	1.58216563210548	0	0	0	0	1.86770977587311	0	1.89697833179407	2.60733178829351	1.55141957711566	0	0	0	0	0	1.98181008988843	1.74383018970019	0	0	0	0	0	0	0	0	0	0	2.96262129824963
Simc1	0	0	0	1.91353563432951	1.9607996208036	1.86080059627647	1.65820783880945	0	0	0	1.79761673641301	0	2.73698960203957	0	1.61232414870373	0	0	0	2.38556280584336	1.38054700437752	0	1.07593735315205	0	0	1.91996529756053	0	1.31821006104027	0	0	0	0	1.69641216920991	0	0	1.53108459818759	0	1.98181008988843	1.74383018970019	0	0	0	0	2.14893933617676	0	0	0	0	0	0
Dapk1	0	0	0	0	0	0	0	0	0	0	0	2.29621992739132	0	0	0	0	0	0	0	0	2.42187281397639	0	0	1.34549899220371	0	0	0	0	0	0	1.88361594048484	2.29341174306379	0	0	1.53108459818759	0	1.98181008988843	0	0	0	0	2.25088926712533	0	0	0	0	0	0	0
Iqgap2	0	0	0	0	0	0	2.89034814709658	0	2.09276742391351	0	0	0	2.1065965598764	0	0	0	0	0	0	0	1.81376069513352	1.07593735315205	0	1.34549899220371	0	1.61103983508343	0	0	0	0	2.13254695967852	0	0	0	1.53108459818759	0	1.98181008988843	0	0	0	2.2058037184276	0	0	0	0	2.22471274565542	0	0	0
Rad51b	0	0	0	0	0	3.12304868192834	0	3.08642460696699	2.09276742391351	2.42593679707958	2.7791757414457	0	0	2.95828168230784	3.22233831009332	2.44127489383508	2.7609471472243	2.81286777189737	2.02508882896837	1.93933903819439	1.81376069513352	1.58216563210548	2.12520704909252	2.72132906007639	3.18977186678287	3.2207978243387	1.86770977587311	0	0	0	2.13254695967852	0	1.70042526017336	1.88740912115649	2.10977392952907	0	1.41777666095699	0	3.07815209415603	1.67598354048649	0	0	0	0	1.99076229945814	0	0	0	2.58266956932763
Susd6	0	0	2.11680980684066	0	0	0	0	0	0	1.49011536301151	0	0	0	0	0	0	0	0	0	0	0	1.07593735315205	0	0	0	0	0	0	0	0	1.05050045916668	0	2.29782894816441	0	0	1.97189696193637	0	2.71850347605744	0	1.67598354048649	0	0	0	2.30510898111946	0	0	0	0	0
Srsf5	0	2.16039887906589	2.48130875585591	0	0	1.86080059627647	1.65820783880945	1.50031631752831	0	0	1.79761673641301	0	2.73698960203957	0	0	0	0	0	0	0	0	0	0	1.34549899220371	0	0	1.86770977587311	0	0	0	1.55141957711566	1.69641216920991	1.70042526017336	0	1.53108459818759	0	1.41777666095699	0	2.69544810697013	0	0	2.25088926712533	0	0	1.99076229945814	0	0	0	1.96237499240504
Foxn3	0	0	0	0	1.9607996208036	2.47298278394242	0	0	0	0	0	0	2.1065965598764	2.31574019311609	1.61232414870373	0	0	0	0	0	1.81376069513352	0	2.12520704909252	0	0	2.83509769274711	0	0	0	0	1.05050045916668	0	1.70042526017336	0	2.10977392952907	0	0	1.74383018970019	2.06763174829063	1.67598354048649	2.2058037184276	2.25088926712533	2.14893933617676	2.30510898111946	0	0	2.32985368712411	0	0
Ttc7b	0	0	0	2.90859484481995	1.9607996208036	0	0	0	0	1.49011536301151	2.40428332153369	0	0	2.31574019311609	1.61232414870373	0	0	0	2.02508882896837	1.93933903819439	1.81376069513352	0	0	0	1.91996529756053	2.19900433308965	0	0	1.89697833179407	0	2.13254695967852	2.29341174306379	0	0	2.47397757925581	2.59290746158095	2.34024664031611	1.74383018970019	2.06763174829063	2.64135083751663	0	2.25088926712533	0	2.30510898111946	1.99076229945814	2.22471274565542	0	2.26314385595782	0
Itpk1	0	2.16039887906589	0	0	0	0	0	0	0	0	0	0	0	0	0	0	0	0	0	1.38054700437752	0	1.07593735315205	0	1.34549899220371	0	1.61103983508343	0	0	0	0	1.05050045916668	1.69641216920991	0	0	0	0	0	0	0	1.67598354048649	0	0	0	2.30510898111946	1.99076229945814	2.22471274565542	0	0	0
Dync1h1	0	0	0	0	0	2.8499342352407	1.65820783880945	1.50031631752831	2.09276742391351	0	0	0	0	0	0	1.83159513585076	0	0	1.45591183197954	0	2.42187281397639	1.07593735315205	0	1.34549899220371	0	0	0	1.9697705634872	0	1.98532411759619	1.05050045916668	1.69641216920991	1.70042526017336	0	0	0	0	0	0	1.67598354048649	2.2058037184276	2.25088926712533	0	0	0	0	0	2.90287816213688	0
Ank	2.0767337617138	0	0	0	0	0	0	1.50031631752831	0	2.06372046693815	0	2.29621992739132	0	0	0	0	0	0	0	2.29568429039192	0	0	0	1.34549899220371	0	0	0	1.9697705634872	0	0	1.05050045916668	0	1.70042526017336	0	1.53108459818759	0	1.41777666095699	0	0	3.1232563009578	0	0	0	0	0	0	0	0	0
Samd12	0	0	0	0	0	0	0	0	0	0	0	0	0	0	0	0	0	0	0	0	0	0	0	0	1.91996529756053	0	0	0	0	0	0	0	0	0	0	0	0	1.74383018970019	0	0	0	0	0	0	0	2.22471274565542	0	0	0
Mtss1	0	2.16039887906589	0	0	1.9607996208036	2.47298278394242	0	0	0	1.49011536301151	0	0	0	0	2.20043099290899	2.81729409483669	0	2.81286777189737	1.45591183197954	0	0	1.07593735315205	3.14086644680827	2.25342706793153	0	1.61103983508343	2.48047245816107	1.9697705634872	2.512152484619	1.98532411759619	1.55141957711566	2.29341174306379	2.29782894816441	2.87957606515677	0	2.59290746158095	1.98181008988843	2.34549268838946	2.69544810697013	0	3.72298426999812	0	0	2.94709552721833	0	0	0	0	1.96237499240504
Pvt1	0	2.16039887906589	2.74786072735801	0	1.9607996208036	2.47298278394242	0	0	0	2.42593679707958	1.79761673641301	0	0	0	2.20043099290899	2.44127489383508	0	1.82764235530237	2.38556280584336	2.76539935017192	0	2.1668756163322	0	1.34549899220371	0	1.61103983508343	1.31821006104027	2.59062182185687	2.512152484619	1.98532411759619	2.13254695967852	0	0	2.5018032443378	2.95052264812006	1.97189696193637	0	3.87519452063808	0	0	2.2058037184276	0	2.14893933617676	0	2.61316976459608	2.86229517162776	0	0	0
Asap1	0	0	0	0	1.9607996208036	1.86080059627647	0	0	0	0	0	0	2.1065965598764	0	2.56827889162845	0	3.03269497873618	2.4369772841275	1.45591183197954	2.29568429039192	0	1.07593735315205	2.12520704909252	1.34549899220371	0	1.61103983508343	2.48047245816107	0	0	1.98532411759619	2.49769862269068	0	0	1.88740912115649	2.10977392952907	1.97189696193637	1.98181008988843	0	0	2.27089805024348	0	0	0	0	0	0	2.32985368712411	0	2.58266956932763
Tcf20	2.70516164150896	2.16039887906589	3.40845126176947	1.91353563432951	2.5809750428345	3.90921777150451	3.27712067670045	3.08642460696699	3.59831457182672	3.22140270867151	3.44078598747238	2.93773767990245	3.12062993213019	2.95828168230784	2.20043099290899	3.08992155079524	0	2.4369772841275	3.30714805303905	3.51891646325958	3.73928169454661	3.33428693923222	3.14086644680827	3.70773632578331	3.58141479900086	3.04642919776342	3.97025060361398	2.97077821408116	2.89021436433324	2.98791283656216	3.68989678364222	3.14723867129186	3.47611714853394	4.13715896833062	3.71003098651685	3.92146499301005	3.25899841940706	3.65722513548892	2.69544810697013	3.29821521770717	2.84229485571925	2.25088926712533	2.14893933617676	2.30510898111946	3.4844829050749	2.22471274565542	2.32985368712411	2.90287816213688	2.96262129824963
Gramd4	0	0	0	0	0	0	0	0	0	0	0	0	0	0	0	0	0	0	0	0	0	0	0	0	0	0	0	0	0	0	0	0	0	0	0	0	0	0	0	0	0	0	0	0	0	2.22471274565542	0	0	0
Slc38a4	2.0767337617138	0	1.53736192508292	1.91353563432951	2.5809750428345	2.47298278394242	0	1.50031631752831	0	0	1.79761673641301	0	0	2.31574019311609	2.56827889162845	0	0	0	2.02508882896837	1.38054700437752	2.42187281397639	1.07593735315205	2.75679354111974	0	0	0	1.31821006104027	2.59062182185687	1.89697833179407	0	1.55141957711566	1.69641216920991	2.66922809545352	0	3.12408724813577	1.97189696193637	2.81178913370242	2.71850347605744	2.69544810697013	0	2.2058037184276	2.88994685880331	3.16662513452432	3.3349084325076	0	2.86229517162776	2.32985368712411	0	0
Lima1	0	0	1.53736192508292	1.91353563432951	0	0	0	2.0752093313443	0	0	0	0	2.1065965598764	2.31574019311609	1.61232414870373	0	0	0	2.38556280584336	2.29568429039192	1.81376069513352	0	0	2.25342706793153	0	1.61103983508343	1.86770977587311	0	1.89697833179407	0	1.05050045916668	2.66465747126812	0	1.88740912115649	2.10977392952907	2.97312237002494	1.41777666095699	0	0	2.27089805024348	0	2.25088926712533	0	0	1.99076229945814	0	0	2.26314385595782	1.96237499240504
Adcy9	0	0	0	0	0	0	0	0	0	0	0	0	2.1065965598764	0	0	1.83159513585076	0	0	0	0	0	0	0	0	0	0	0	0	0	0	0	1.69641216920991	0	0	0	0	1.41777666095699	0	0	0	0	0	0	0	1.99076229945814	0	0	0	1.96237499240504
Arhgap31	0	2.16039887906589	0	3.39735793877698	1.9607996208036	0	0	0	0	0	1.79761673641301	0	0	0	2.20043099290899	1.83159513585076	0	1.82764235530237	0	1.38054700437752	0	2.1668756163322	2.12520704909252	1.89914859896049	2.53698058623264	2.56679750214283	1.86770977587311	2.59062182185687	3.37856355483282	1.98532411759619	1.88361594048484	2.29341174306379	0	0	3.27193567392086	2.97312237002494	2.60355817831654	1.74383018970019	0	0	0	0	0	0	2.99389746869899	0	0	3.56820950338742	1.96237499240504
Phldb2	0	2.79417860972536	1.53736192508292	0	0	0	0	0	0	1.49011536301151	0	0	0	0	1.61232414870373	1.83159513585076	0	0	0	2.76539935017192	0	1.07593735315205	0	0	2.53698058623264	0	0	0	0	0	1.05050045916668	2.29341174306379	0	0	0	0	1.41777666095699	1.74383018970019	0	1.67598354048649	0	0	2.14893933617676	0	0	2.22471274565542	0	0	0
App	0	0	0	0	0	0	0	0	0	0	0	0	0	2.31574019311609	0	0	0	0	2.02508882896837	0	1.81376069513352	1.07593735315205	0	1.34549899220371	0	0	0	0	0	0	1.55141957711566	1.69641216920991	1.70042526017336	0	2.47397757925581	1.97189696193637	2.34024664031611	0	0	0	3.22813812817313	0	2.78201386269936	0	0	2.22471274565542	0	0	1.96237499240504
Hlcs	0	0	0	0	0	1.86080059627647	0	0	0	0	0	0	0	0	0	0	0	0	0	0	0	1.07593735315205	0	0	0	0	1.31821006104027	0	1.89697833179407	0	1.88361594048484	0	0	0	1.53108459818759	0	1.41777666095699	1.74383018970019	0	0	0	0	0	0	1.99076229945814	0	0	0	0
Arid1b	0	0	0	0	0	1.86080059627647	2.25126943049447	2.0752093313443	0	1.49011536301151	0	0	2.73698960203957	0	0	1.83159513585076	0	2.4369772841275	3.17883451862591	2.29568429039192	1.81376069513352	2.1668756163322	0	1.34549899220371	0	2.56679750214283	1.31821006104027	1.9697705634872	0	2.98791283656216	2.87535594514573	1.69641216920991	0	1.88740912115649	2.47397757925581	2.59290746158095	1.98181008988843	0	2.06763174829063	0	0	2.25088926712533	2.78201386269936	0	2.61316976459608	2.22471274565542	2.32985368712411	2.26314385595782	0
Tulp4	0	0	0	0	0	0	0	0	0	0	0	0	2.73698960203957	0	0	0	0	1.82764235530237	0	1.38054700437752	0	0	0	1.34549899220371	0	0	1.31821006104027	0	0	0	1.88361594048484	0	0	0	1.53108459818759	0	0	0	0	0	0	0	0	0	0	2.22471274565542	2.97312237002494	0	0
Slc22a3	0	0	0	0	0	0	0	0	0	0	0	0	0	0	0	0	0	0	0	0	0	0	0	0	0	0	0	0	0	0	0	0	0	0	0	0	0	0	0	0	0	0	0	0	0	0	0	0	0
Airn	2.70516164150896	0	2.11680980684066	0	3.2355372264227	2.47298278394242	0	2.0752093313443	0	0	1.79761673641301	2.29621992739132	0	2.95828168230784	1.61232414870373	0	0	1.82764235530237	2.02508882896837	2.29568429039192	1.81376069513352	1.91666108955033	2.12520704909252	1.34549899220371	1.91996529756053	2.19900433308965	0	1.9697705634872	2.512152484619	0	1.05050045916668	0	1.70042526017336	1.88740912115649	2.74037240642779	3.24793615704216	1.41777666095699	0	2.06763174829063	1.67598354048649	0	0	2.14893933617676	0	0	2.22471274565542	2.97312237002494	2.26314385595782	0
Caskin1	0	2.16039887906589	2.11680980684066	0	0	0	0	1.50031631752831	0	0	0	0	0	0	0	0	0	0	2.02508882896837	1.38054700437752	1.81376069513352	0	0	0	0	0	1.31821006104027	1.9697705634872	0	0	1.05050045916668	2.29341174306379	0	0	0	0	0	1.74383018970019	0	0	0	2.25088926712533	0	0	0	0	0	0	1.96237499240504
Anks1	2.0767337617138	0	0	0	0	1.86080059627647	0	0	0	0	0	0	0	2.31574019311609	0	1.83159513585076	2.38660847126374	2.4369772841275	0	0	0	0	0	1.89914859896049	0	0	1.31821006104027	1.9697705634872	0	0	2.33169797722837	1.69641216920991	1.70042526017336	0	0	0	0	1.74383018970019	0	0	0	0	0	0	0	0	2.32985368712411	0	0
Prrc2a	0	0	0	1.91353563432951	0	1.86080059627647	0	2.43793040895244	0	0	1.79761673641301	0	0	0	2.20043099290899	0	0	0	0	0	1.81376069513352	0	0	0	0	1.61103983508343	1.86770977587311	0	0	0	1.55141957711566	1.69641216920991	0	2.5018032443378	1.53108459818759	1.97189696193637	0	1.74383018970019	0	0	0	2.25088926712533	0	0	0	0	2.32985368712411	0	0
Vegfa	0	0	0	0	1.9607996208036	0	0	0	0	0	0	0	0	0	0	0	0	0	0	0	0	0	0	0	0	0	0	0	0	0	0	0	0	0	0	0	0	0	0	0	0	0	0	0	0	0	0	0	0
Satb1	2.0767337617138	0	2.11680980684066	3.18254498169763	0	3.12304868192834	0	0	0	0	0	0	0	0	1.61232414870373	0	1.78141811543332	3.29938734827684	2.85887879069998	2.55787098350466	1.81376069513352	1.58216563210548	0	1.34549899220371	0	1.61103983508343	0	1.9697705634872	0	1.98532411759619	1.88361594048484	1.69641216920991	0	1.88740912115649	2.10977392952907	0	0	0	0	0	0	0	0	0	0	2.22471274565542	0	0	0
Ptprm	0	0	0	0	0	0	1.65820783880945	0	2.09276742391351	0	0	0	3.12062993213019	0	1.61232414870373	1.83159513585076	0	0	0	2.29568429039192	1.81376069513352	0	2.75679354111974	1.34549899220371	0	0	0	0	1.89697833179407	0	1.05050045916668	0	0	2.5018032443378	2.47397757925581	2.97312237002494	0	0	0	0	0	2.25088926712533	2.14893933617676	0	0	0	0	0	1.96237499240504
Ppargc1b	0	0	0	0	0	0	0	0	3.10557101987308	0	0	0	0	0	0	1.83159513585076	0	2.4369772841275	0	0	0	0	0	0	0	1.61103983508343	0	0	1.89697833179407	1.98532411759619	1.05050045916668	0	0	2.87957606515677	1.53108459818759	1.97189696193637	0	0	0	0	0	2.88994685880331	0	0	0	0	2.97312237002494	2.90287816213688	0
Nedd4l	2.70516164150896	0	0	1.91353563432951	0	0	0	0	0	2.06372046693815	0	0	0	0	0	0	2.38660847126374	0	0	1.38054700437752	0	0	0	1.89914859896049	2.53698058623264	1.61103983508343	0	0	0	0	0	0	0	2.87957606515677	0	1.97189696193637	0	0	0	0	0	2.25088926712533	0	2.30510898111946	1.99076229945814	0	0	0	1.96237499240504
Zbtb7c	0	0	0	0	0	0	1.65820783880945	0	0	0	1.79761673641301	0	0	0	0	0	0	0	2.38556280584336	0	0	0	2.12520704909252	1.34549899220371	0	1.61103983508343	1.86770977587311	0	0	0	0	1.69641216920991	0	0	2.10977392952907	0	1.98181008988843	0	0	0	0	0	0	0	0	0	0	0	1.96237499240504
Malat1	4.15583631477931	4.9355003666406	4.56392961105814	3.97016110482699	4.76213219029498	3.79393862143932	3.27712067670045	4.69113056387288	4.61018247905539	4.02538238318757	4.33766584571819	4.76366987847512	4.38729252887754	4.42114855474918	4.6949213497549	4.55796424084815	4.09865624121471	4.37308805696155	4.38104374469282	4.56711985049192	4.53691772674664	4.45481913321339	4.89592276085778	4.48912130330255	5.02610676465573	4.53457999021634	4.98392523092558	3.91904333904811	4.45418258145681	4.84125476544797	4.72335222488516	4.63908732774269	4.68611050047102	3.94003047035101	4.73020544352725	4.6046567579789	4.73273251670343	4.5579123535694	4.3433748204404	3.69128749944673	5.87608723814788	5.83143389815038	6.17018112893244	6.15340072561194	5.56131840187974	5.85086438223535	6.1416543051026	5.81983753722367	5.6212315271375
Neat1	0	0	0	1.91353563432951	3.2355372264227	2.47298278394242	0	0	0	1.49011536301151	1.79761673641301	0	0	0	0	0	1.78141811543332	1.82764235530237	0	1.93933903819439	2.42187281397639	1.07593735315205	2.12520704909252	2.51449854005196	1.91996529756053	2.56679750214283	2.22030946179844	0	0	0	1.55141957711566	2.29341174306379	2.66922809545352	3.1531190082218	0	2.59290746158095	1.98181008988843	0	0	2.27089805024348	2.2058037184276	2.25088926712533	2.14893933617676	0	2.61316976459608	0	2.97312237002494	2.26314385595782	2.96262129824963
Ahnak	0	0	0	0	1.9607996208036	0	0	1.50031631752831	0	0	0	2.29621992739132	0	0	0	0	0	0	0	0	0	0	0	0	0	1.61103983508343	0	1.9697705634872	0	0	0	1.69641216920991	0	0	0	1.97189696193637	0	0	0	1.67598354048649	2.2058037184276	0	0	0	1.99076229945814	0	2.32985368712411	0	0
Dock8	0	0	0	0	0	0	2.25126943049447	1.50031631752831	0	0	1.79761673641301	0	0	0	0	0	0	0	0	1.38054700437752	1.81376069513352	1.07593735315205	0	1.89914859896049	0	2.19900433308965	2.22030946179844	1.9697705634872	0	1.98532411759619	1.55141957711566	0	1.70042526017336	0	1.53108459818759	0	1.98181008988843	0	0	1.67598354048649	0	0	2.14893933617676	2.30510898111946	0	2.22471274565542	0	0	2.96262129824963
Kank1	2.0767337617138	0	0	0	0	0	0	0	0	0	0	0	0	0	0	0	0	0	0	0	1.81376069513352	2.1668756163322	0	1.34549899220371	0	0	0	0	0	1.98532411759619	0	0	0	0	0	0	1.41777666095699	0	0	0	0	2.88994685880331	0	0	0	0	0	0	0
Pcgf5	0	2.79417860972536	1.53736192508292	0	0	0	2.25126943049447	0	0	0	0	0	0	0	0	0	0	1.82764235530237	0	0	1.81376069513352	1.91666108955033	0	0	0	1.61103983508343	1.31821006104027	2.59062182185687	1.89697833179407	0	1.55141957711566	1.69641216920991	0	1.88740912115649	0	0	1.41777666095699	0	2.69544810697013	0	2.2058037184276	2.88994685880331	0	0	0	2.22471274565542	2.32985368712411	2.26314385595782	2.58266956932763
Sorbs1	3.36430751591787	2.16039887906589	0	0	3.6278025780313	1.86080059627647	0	2.70353520553434	0	0	2.7791757414457	2.29621992739132	0	3.34629267128739	1.61232414870373	3.08992155079524	1.78141811543332	2.81286777189737	1.45591183197954	2.55787098350466	2.42187281397639	1.58216563210548	0	2.51449854005196	3.18977186678287	1.61103983508343	1.31821006104027	0	2.89021436433324	0	1.05050045916668	3.14723867129186	3.32710777354797	2.5018032443378	3.12408724813577	1.97189696193637	1.41777666095699	2.34549268838946	0	1.67598354048649	2.2058037184276	0	3.44371490765316	2.30510898111946	2.99389746869899	2.86229517162776	3.36139270087774	2.90287816213688	2.58266956932763
Tcf7l2	3.75817700121094	0	2.11680980684066	0	2.96088294434551	3.12304868192834	2.25126943049447	1.50031631752831	2.09276742391351	0	1.79761673641301	0	0	2.95828168230784	1.61232414870373	2.44127489383508	1.78141811543332	1.82764235530237	0	0	1.81376069513352	2.67615934272763	0	1.34549899220371	1.91996529756053	2.56679750214283	1.86770977587311	3.63795947878054	0	1.98532411759619	0	1.69641216920991	0	2.5018032443378	2.47397757925581	0	0	0	2.69544810697013	0	0	0	0	0	0	2.22471274565542	0	2.26314385595782	1.96237499240504
[truncated: 2,845 more columns]
