# Supplementary material for: Single nuclei RNA-seq of mouse placental labyrinth development
Source: eLife. 2020 Nov 3;9:e60266. doi: 10.7554/eLife.60266 (PMC7669270; doi:10.7554/eLife.60266)
Supplement: Figure 2—source data 3. [file elife-60266-fig2-data3.csv]

	ACTATTCGTACGATCT_2	AGGGTTTGTGAGAACC_2	CGTTCTGGTTGCCATA_2	TCGGATAAGCTCCATA_2	GTTGTGAAGATAGCTA_4	TCACACCAGTATGTAG_4	TGCAGGCAGCCAGTAG_4	AGAGCCCCACTCCACT_4	ATTTCTGTCTTCTCAA_4	CCTCTAGTCAAGAGTA_3	ACTCCCAAGATCGACG_2	TGATTCTCATCGTTCC_2	TCATGCCCACTAGTAC_3	TTGTTTGCACGACAAG_2	CTTTCAAAGCTCTATG_3	TTTGTTGGTAACGCGA_1	TGTAACGGTTCGGCTG_4	CAGCGTGTCAAGGTGG_4	TTGAGTGGTGCATTTG_1	GCCGTGAGTCTTTCTA_3	GTTCGCTGTTCTCTAT_2	TTTGATCCATTGTGCA_1	TGAATGCCACGCGTCA_4	GTCCCATAGTCATGAA_4	CCACTTGGTCACTCAA_4	CACTAAGTCCATTGCC_3	AACAAAGGTACATACC_1	CCATCACCATGAAGGC_3	GAGTCTATCGTGTTCC_4	AGTTCGATCCCATAGA_2	CGTAAGTAGTCACTAC_2	TGTTACTCAGTAACGG_2	AGTAGCTTCCGAACGC_2	CAAAGAAGTGATTCTG_2	CAGGCCATCGTTATCT_3	CTGTGGGCACTGAATC_1	CACCAAAGTTTGGAGG_1	GAGCCTGAGTGATCGG_2	AACCTGAGTGAGATAT_1	CCTTGTGTCATGCCAA_1	CTTCCTTGTTGCGAAG_4	GATGATCAGGTAGTAT_3	ATTTCTGCAGCTGGTC_2	CTCCATGAGCATCGAG_3	AGTCTCCTCGGCAGTC_1	TGAGGAGGTGTGCCTG_1	CGGGTGTCAACTGTGT_3	CGAGTTAAGAGAGTTT_2	ATCGTAGTCCGACGGT_3
Sgk3	0	1.34549899220371	0	0	0	0	0	1.57120184588599	0	0	0	0	0	0	0	0	0	0	0	0	0	0	1.88172665405828	0	0	0	0	0	0	0	0	2.06763174829063	0	0	0	0	0	1.69641216920991	0	0	0	0	1.31821006104027	2.32985368712411	1.53736192508292	0	2.22471274565542	0	0
Tsga10	0	0	0	1.41777666095699	0	1.54602136135724	1.31901235403657	0	0	0	0	0	0	0	0	0	0	0	0	0	0	0	0	0	0	0	0	2.30510898111946	0	0	0	0	0	0	0	0	0	1.69641216920991	0	0	0	0	0	0	0	0	0	0	0
Ankrd44	0	1.34549899220371	0	0	0	0	0	1.57120184588599	0	1.99076229945814	0	0	0	0	2.90287816213688	0	0	0	0	0	1.53108459818759	0	0	0	0	0	0	0	0	0	0	0	0	0	0	0	0	0	0	1.9607996208036	0	0	0	0	0	0	0	0	0
Tns1	1.07593735315205	0	2.33169797722837	1.41777666095699	1.49896467357776	1.54602136135724	2.48147611469121	2.15464838700388	2.44271233217692	1.99076229945814	2.75679354111974	0	0	1.67598354048649	0	1.93933903819439	0	0	1.82764235530237	0	2.10977392952907	1.45591183197954	0	0	0	0	0	2.94709552721833	1.90035706071708	0	2.98791283656216	0	1.91996529756053	2.97077821408116	2.14893933617676	1.65820783880945	0	0	0	0	1.68881504459798	2.96262129824963	0	2.32985368712411	1.53736192508292	0	0	1.89697833179407	0
Ap1s3	0	0	0	1.41777666095699	1.49896467357776	0	0	0	0	1.99076229945814	2.12520704909252	1.74383018970019	0	0	0	1.38054700437752	0	0	0	0	0	1.45591183197954	1.88172665405828	0	0	0	0	0	1.90035706071708	0	0	0	0	0	0	0	0	0	0	0	2.2850446887007	0	1.31821006104027	0	0	0	2.22471274565542	0	2.2058037184276
Agfg1	1.07593735315205	0	0	0	1.49896467357776	0	0	1.57120184588599	0	0	0	1.74383018970019	2.29141179239592	0	0	1.93933903819439	0	0	0	0	1.53108459818759	0	0	0	0	2.25088926712533	0	0	0	0	0	0	1.91996529756053	0	0	1.65820783880945	1.91353563432951	1.69641216920991	2.16039887906589	0	1.68881504459798	0	0	0	0	0	0	0	0
Plekha6	1.91666108955033	0	1.05050045916668	0	1.49896467357776	1.54602136135724	1.31901235403657	0	3.98007425725984	0	2.12520704909252	0	0	1.67598354048649	2.90287816213688	1.38054700437752	3.4826465252231	2.51615335692629	0	0	2.47397757925581	2.38556280584336	2.49565373784495	2.72602906103627	2.63933594582324	0	2.70516164150896	0	1.90035706071708	0	0	2.69544810697013	0	2.59062182185687	0	2.62101564260524	0	1.69641216920991	0	0	3.31339936782539	0	1.86770977587311	0	0	0	2.22471274565542	0	3.90127073760057
Stx6	0	0	0	0	0	0	0	0	0	0	0	0	0	0	0	0	0	0	0	0	0	0	0	1.75048145574537	0	0	0	0	0	0	0	0	0	0	0	0	0	0	0	0	0	0	0	0	0	0	2.22471274565542	0	0
Plxna2	0	0	0	0	2.07368788619427	1.54602136135724	0	0	0	0	0	0	0	0	0	0	1.9891267505551	1.56728726629958	0	0	0	0	0	1.75048145574537	0	2.25088926712533	0	0	0	0	0	2.06763174829063	0	0	0	0	0	0	0	0	0	0	0	0	0	0	0	0	2.2058037184276
Fam129b	0	0	0	0	0	1.54602136135724	0	0	0	0	0	0	0	0	0	0	0	1.56728726629958	0	0	0	0	1.88172665405828	1.75048145574537	0	0	0	0	1.90035706071708	0	0	0	0	0	0	0	0	0	0	0	0	0	0	2.32985368712411	0	1.83159513585076	2.22471274565542	0	0
Ralgps1	1.07593735315205	0	0	0	1.49896467357776	0	0	0	0	0	0	0	0	0	0	0	0	0	1.82764235530237	0	0	0	0	2.35277882971183	2.63933594582324	2.25088926712533	0	0	0	1.61103983508343	0	0	0	0	0	0	0	0	0	1.9607996208036	0	0	0	0	0	0	0	0	0
Dennd1a	2.91206071148866	1.89914859896049	3.48444686313941	2.81178913370242	2.43634246842745	2.4914093412497	1.86863594734354	2.15464838700388	3.30543892212377	2.99389746869899	0	1.74383018970019	2.29141179239592	1.67598354048649	0	3.21151327114172	1.9891267505551	2.78343635018663	1.82764235530237	0	2.95052264812006	2.85887879069998	0	2.99720597304345	3.29612579984049	0	0	2.94709552721833	2.51580470673591	2.19900433308965	1.98532411759619	2.06763174829063	1.91996529756053	1.9697705634872	3.44371490765316	2.89034814709658	2.90859484481995	2.29341174306379	0	1.9607996208036	3.138329901459	2.58266956932763	2.85763970874937	2.97312237002494	2.48130875585591	1.83159513585076	2.86229517162776	0	0
Fmnl2	0	1.34549899220371	0	0	2.07368788619427	0	1.31901235403657	1.57120184588599	2.44271233217692	0	0	0	0	0	0	0	0	0	0	0	0	0	0	0	2.63933594582324	0	0	0	0	0	0	0	0	0	0	0	0	0	0	0	0	1.96237499240504	0	0	0	0	0	0	0
Prr5l	0	0	0	1.41777666095699	1.49896467357776	0	0	0	1.83291754172156	0	0	0	0	0	0	0	0	0	0	0	1.53108459818759	0	0	0	0	0	0	0	0	0	0	0	0	0	0	0	0	0	0	0	0	0	0	0	0	0	0	0	0
Ppip5k1	1.07593735315205	0	0	0	0	1.54602136135724	0	0	0	0	0	0	0	0	0	0	0	0	0	2.47397757925581	0	0	0	0	0	0	0	0	0	0	0	0	0	0	0	0	0	0	0	0	0	0	0	0	0	0	0	0	0
B230312C02Rik	0	0	0	0	0	1.54602136135724	0	0	0	0	0	0	0	0	0	0	0	0	0	0	0	0	0	0	0	0	0	0	0	0	0	0	0	0	0	0	0	0	0	0	0	0	0	0	0	0	0	0	0
Slco4a1	1.07593735315205	0	0	0	0	0	0	1.57120184588599	0	0	0	0	0	0	2.26314385595782	0	0	0	0	2.47397757925581	0	0	1.88172665405828	0	0	0	0	0	0	0	1.98532411759619	0	1.91996529756053	0	0	0	0	0	0	0	1.68881504459798	0	0	0	0	0	0	0	0
Arhgef6	2.1668756163322	1.89914859896049	0	0	1.49896467357776	2.75817590126603	1.31901235403657	0	1.83291754172156	0	2.75679354111974	0	2.93267413758685	0	0	0	3.6598339270642	1.56728726629958	0	0	2.10977392952907	1.45591183197954	2.49565373784495	1.75048145574537	2.01516306475125	0	0	0	0	0	2.60733178829351	0	0	0	0	0	0	0	0	0	1.68881504459798	2.58266956932763	0	0	2.74786072735801	0	0	0	0
Maged1	0	1.34549899220371	1.05050045916668	0	1.49896467357776	2.4914093412497	0	0	0	0	0	1.74383018970019	0	0	0	1.38054700437752	0	0	0	0	0	0	2.49565373784495	1.75048145574537	2.63933594582324	0	2.0767337617138	2.30510898111946	2.89396786284092	0	0	0	0	0	2.14893933617676	0	0	0	0	0	0	0	0	0	0	0	2.22471274565542	0	0
Las1l	1.07593735315205	1.34549899220371	1.05050045916668	0	0	1.54602136135724	0	1.57120184588599	1.83291754172156	0	0	0	2.29141179239592	0	0	0	0	0	0	2.47397757925581	0	0	1.88172665405828	1.75048145574537	0	2.88994685880331	0	0	1.90035706071708	0	1.98532411759619	2.06763174829063	0	0	2.14893933617676	0	0	1.69641216920991	0	0	1.68881504459798	0	0	0	0	0	0	0	2.2058037184276
Stard8	0	0	0	0	0	0	0	0	0	0	0	0	0	0	0	0	0	0	0	0	0	0	0	0	2.01516306475125	0	0	2.30510898111946	0	2.19900433308965	0	0	0	0	0	0	0	0	0	0	0	1.96237499240504	0	0	0	0	0	0	0
Amot	0	0	0	0	0	1.54602136135724	0	0	1.83291754172156	0	0	0	0	0	0	1.93933903819439	1.9891267505551	0	0	0	0	1.45591183197954	0	0	2.01516306475125	0	0	0	0	0	0	0	0	1.9697705634872	0	0	0	0	0	0	0	0	0	0	0	0	0	0	0
Nhs	1.91666108955033	1.34549899220371	0	2.34024664031611	4.03658873524503	1.54602136135724	1.31901235403657	2.52069886019704	2.81877445741025	0	0	0	2.93267413758685	0	0	0	1.9891267505551	2.51615335692629	0	0	3.12408724813577	1.45591183197954	0	0	0	3.77232138408835	0	2.30510898111946	1.90035706071708	0	2.60733178829351	0	2.91572351951435	0	2.14893933617676	1.65820783880945	0	1.69641216920991	0	0	1.68881504459798	1.96237499240504	1.86770977587311	0	0	0	0	3.16390797782261	2.2058037184276
Fndc3b	3.10279794458069	3.27944096983364	2.76459768562531	1.98181008988843	3.57712393962582	3.53324441369028	3.13191425983843	3.84479590697991	3.09142435139618	2.61316976459608	3.14086644680827	2.98955466600737	3.32022831912849	2.27089805024348	3.78569582032458	2.29568429039192	2.99209791702142	3.16807757604294	1.82764235530237	0	2.10977392952907	3.17883451862591	3.68772408465003	4.4051980518457	3.29612579984049	2.88994685880331	2.0767337617138	2.94709552721833	3.55904672250949	3.04642919776342	2.60733178829351	3.07815209415603	1.91996529756053	2.59062182185687	0	2.62101564260524	2.53004053634353	1.69641216920991	0	0	3.59194173699676	3.62958708665427	2.22030946179844	2.32985368712411	1.53736192508292	2.44127489383508	3.5264575884357	2.89021436433324	3.50586298710512
Pex5l	0	0	0	0	0	0	1.31901235403657	0	0	0	0	0	0	0	0	0	0	0	0	0	0	0	1.88172665405828	0	2.01516306475125	0	0	2.30510898111946	0	0	0	0	0	0	0	0	0	0	0	0	0	0	0	0	0	0	0	0	0
4932438A13Rik	1.58216563210548	0	1.05050045916668	1.41777666095699	1.49896467357776	2.75817590126603	0	1.57120184588599	2.81877445741025	0	0	0	0	0	0	0	2.99209791702142	1.56728726629958	0	0	1.53108459818759	0	1.88172665405828	1.75048145574537	3.29612579984049	0	0	2.30510898111946	2.51580470673591	0	1.98532411759619	0	0	0	2.14893933617676	0	0	1.69641216920991	0	1.9607996208036	2.2850446887007	1.96237499240504	0	0	0	2.44127489383508	0	0	0
Maml3	3.72780091938086	3.70773632578331	2.64002623834155	3.47442691277978	4.51528199824622	5.35416563317137	3.91830460467128	4.64377118752578	4.15927691336148	1.99076229945814	4.31409988241685	2.34549268838946	2.93267413758685	3.29821521770717	2.90287816213688	1.38054700437752	4.05668309548294	3.16807757604294	1.82764235530237	0	3.71003098651685	2.64996674108913	4.21623711662917	4.8258444685208	4.28388246893004	3.95080247360977	0	2.94709552721833	4.45811034757372	3.49844895623993	2.98791283656216	2.06763174829063	3.18977186678287	3.46088532368559	3.44371490765316	0	2.53004053634353	3.6009970763299	2.16039887906589	1.9607996208036	4.5858587001981	3.91061528722891	3.73888086347414	0	1.53736192508292	2.81729409483669	3.24853074860739	3.37856355483282	3.90127073760057
Wwtr1	2.1668756163322	1.34549899220371	1.55141957711566	0	0	0	1.31901235403657	1.57120184588599	0	1.99076229945814	0	2.34549268838946	0	0	0	0	0	0	1.82764235530237	0	2.10977392952907	2.02508882896837	0	0	2.01516306475125	0	0	0	0	0	0	0	0	2.97077821408116	0	1.65820783880945	0	2.29341174306379	0	0	0	0	0	0	0	0	2.22471274565542	0	0
Med12l	1.07593735315205	1.34549899220371	0	0	1.49896467357776	1.54602136135724	0	0	0	0	0	0	2.29141179239592	0	2.26314385595782	0	0	0	1.82764235530237	0	2.95052264812006	1.45591183197954	0	2.99720597304345	2.63933594582324	0	2.0767337617138	2.30510898111946	0	0	1.98532411759619	0	0	0	0	0	0	1.69641216920991	0	0	0	0	0	3.64036522589665	0	1.83159513585076	0	0	0
Rapgef2	2.36684574406429	1.89914859896049	2.13254695967852	1.41777666095699	0	2.12650693025845	2.85867215740902	2.78807531279701	0	1.99076229945814	2.12520704909252	1.74383018970019	0	0	0	1.93933903819439	1.9891267505551	2.15027894264002	0	0	2.10977392952907	2.85887879069998	0	2.35277882971183	0	2.88994685880331	2.70516164150896	3.3349084325076	1.90035706071708	2.56679750214283	2.98791283656216	2.69544810697013	2.53698058623264	0	2.78201386269936	2.62101564260524	2.53004053634353	1.69641216920991	0	1.9607996208036	2.2850446887007	1.96237499240504	2.68673356565757	0	2.74786072735801	0	3.5264575884357	2.89021436433324	0
Camk2d	0	0	1.88361594048484	1.98181008988843	2.07368788619427	2.12650693025845	2.48147611469121	1.57120184588599	0	1.99076229945814	2.12520704909252	0	0	0	2.26314385595782	1.93933903819439	1.9891267505551	0	0	0	2.10977392952907	0	0	2.99720597304345	0	0	2.0767337617138	2.94709552721833	1.90035706071708	0	0	2.06763174829063	0	2.59062182185687	2.14893933617676	0	0	1.69641216920991	2.79417860972536	0	0	0	0	0	0	0	2.22471274565542	0	0
Sgms2	0	0	0	0	0	1.54602136135724	0	0	0	0	0	0	0	0	0	0	0	0	0	0	0	1.45591183197954	0	0	0	0	0	0	0	0	0	0	0	0	0	0	0	0	0	0	0	0	0	0	0	0	0	0	0
Frmpd1	2.53341453263154	0	1.88361594048484	1.41777666095699	0	0	0	0	0	0	0	0	0	0	0	0	1.9891267505551	0	0	0	0	0	0	0	0	0	0	0	1.90035706071708	1.61103983508343	1.98532411759619	0	0	0	0	0	0	0	0	0	0	1.96237499240504	1.31821006104027	0	0	0	0	0	0
Shb	1.58216563210548	0	0	0	0	0	0	0	0	0	2.12520704909252	0	0	0	0	0	0	0	0	0	0	1.45591183197954	0	0	0	0	0	0	0	1.61103983508343	2.60733178829351	0	0	0	0	0	0	0	0	0	1.68881504459798	1.96237499240504	0	0	0	1.83159513585076	2.22471274565542	0	0
Patj	0	1.89914859896049	1.05050045916668	0	2.07368788619427	1.54602136135724	2.22128588849634	0	2.44271233217692	1.99076229945814	0	0	0	1.67598354048649	2.26314385595782	0	3.26715511799141	2.78343635018663	0	0	0	1.45591183197954	0	1.75048145574537	0	2.25088926712533	0	0	1.90035706071708	0	0	2.06763174829063	0	0	0	0	0	0	0	2.5809750428345	0	1.96237499240504	1.86770977587311	0	0	0	0	0	2.84229485571925
Dab1	0	0	0	0	0	0	1.31901235403657	0	1.83291754172156	0	0	0	0	0	0	0	0	0	0	0	0	0	0	0	0	0	0	0	0	0	0	0	0	0	0	0	0	0	0	0	0	0	0	0	0	0	0	0	0
Glis1	0	0	0	0	0	0	1.31901235403657	1.57120184588599	1.83291754172156	0	0	0	0	0	2.26314385595782	1.38054700437752	0	0	0	3.12408724813577	1.53108459818759	0	0	2.35277882971183	0	0	0	0	0	1.61103983508343	0	0	0	2.59062182185687	0	0	0	1.69641216920991	0	0	1.68881504459798	0	0	0	1.53736192508292	0	2.22471274565542	0	0
Lrp8	0	0	0	0	0	0	0	0	0	0	0	0	0	1.67598354048649	0	1.38054700437752	0	1.56728726629958	0	0	0	0	0	0	0	0	0	0	0	0	0	0	0	0	0	0	0	0	0	0	0	1.96237499240504	0	0	0	0	0	0	0
Echdc2	0	0	1.05050045916668	0	0	0	0	0	0	0	0	0	0	0	0	0	0	0	0	0	0	0	0	0	0	0	0	0	0	0	0	0	0	0	0	0	0	0	2.16039887906589	0	1.68881504459798	0	0	0	0	0	0	0	0
Macf1	2.1668756163322	3.16635305706981	2.76459768562531	2.34024664031611	1.49896467357776	0	3.86231461159568	3.32096297518181	2.81877445741025	1.99076229945814	3.81215377636766	2.71850347605744	3.59883317342915	0	2.26314385595782	2.55787098350466	0	1.56728726629958	3.08542793606403	0	2.10977392952907	0	2.49565373784495	3.38588892208523	2.01516306475125	2.25088926712533	2.0767337617138	2.30510898111946	2.51580470673591	3.2207978243387	2.98791283656216	3.07815209415603	2.53698058623264	3.24556160483345	3.16662513452432	1.65820783880945	0	0	0	0	0	2.58266956932763	1.86770977587311	0	0	2.44127489383508	3.24853074860739	1.89697833179407	3.22813812817313
Asap3	0	1.34549899220371	1.05050045916668	0	0	0	0	0	0	0	0	0	0	0	0	1.93933903819439	1.9891267505551	0	0	0	0	0	1.88172665405828	0	0	0	0	0	0	0	0	0	1.91996529756053	0	0	0	0	0	0	0	0	0	1.31821006104027	0	0	0	0	0	0
Hspg2	2.36684574406429	2.72132906007639	1.88361594048484	1.98181008988843	0	1.54602136135724	1.31901235403657	2.52069886019704	0	0	3.14086644680827	2.98955466600737	0	0	2.26314385595782	0	0	2.15027894264002	0	2.47397757925581	0	0	2.87325333791181	0	0	2.25088926712533	0	0	0	2.19900433308965	0	2.69544810697013	0	0	0	0	0	0	2.16039887906589	1.9607996208036	0	0	0	0	0	1.83159513585076	2.22471274565542	1.89697833179407	0
Usp48	0	1.89914859896049	0	0	2.07368788619427	0	0	0	1.83291754172156	1.99076229945814	0	2.34549268838946	0	0	0	0	0	0	1.82764235530237	0	0	0	0	0	0	0	2.0767337617138	0	0	0	1.98532411759619	0	0	0	0	0	0	0	2.16039887906589	0	0	1.96237499240504	1.31821006104027	0	0	0	0	1.89697833179407	0
Ubr4	0	1.34549899220371	1.05050045916668	0	1.49896467357776	2.12650693025845	1.86863594734354	0	1.83291754172156	0	0	1.74383018970019	0	0	0	0	0	1.56728726629958	0	2.47397757925581	0	0	2.87325333791181	0	0	0	2.0767337617138	0	0	0	0	0	0	0	2.14893933617676	0	0	1.69641216920991	0	0	0	1.96237499240504	0	0	0	0	0	0	2.2058037184276
Spen	1.07593735315205	1.89914859896049	2.13254695967852	1.41777666095699	0	2.4914093412497	1.86863594734354	0	2.44271233217692	0	2.12520704909252	0	0	1.67598354048649	0	0	1.9891267505551	2.51615335692629	0	0	0	1.45591183197954	1.88172665405828	0	0	2.25088926712533	0	0	1.90035706071708	0	1.98532411759619	0	0	0	2.14893933617676	1.65820783880945	1.91353563432951	1.69641216920991	0	0	0	0	2.22030946179844	0	2.11680980684066	0	2.22471274565542	1.89697833179407	0
Kazn	0	1.89914859896049	1.55141957711566	1.41777666095699	2.43634246842745	2.12650693025845	1.31901235403657	1.57120184588599	0	0	0	0	3.32022831912849	0	0	1.38054700437752	2.99209791702142	2.51615335692629	0	3.12408724813577	0	0	3.14670595881875	0	2.01516306475125	0	0	0	1.90035706071708	1.61103983508343	0	0	0	0	0	0	0	0	0	0	2.65599788163814	0	0	0	0	1.83159513585076	2.86229517162776	2.512152484619	0
Prkcz	0	0	0	0	0	0	0	0	0	2.61316976459608	0	1.74383018970019	0	2.64135083751663	0	1.38054700437752	0	0	0	0	2.74037240642779	0	0	0	0	0	0	0	0	0	1.98532411759619	2.06763174829063	0	0	0	1.65820783880945	0	1.69641216920991	0	0	1.68881504459798	1.96237499240504	0	0	1.53736192508292	0	0	0	0
Agrn	0	0	0	0	0	0	0	0	0	0	0	0	0	0	0	0	1.9891267505551	1.56728726629958	0	0	0	0	0	1.75048145574537	0	0	0	0	0	1.61103983508343	0	0	0	0	0	0	0	0	0	0	2.65599788163814	0	0	0	0	0	0	0	0
Cdk14	1.58216563210548	1.34549899220371	2.13254695967852	1.98181008988843	2.43634246842745	0	1.86863594734354	2.15464838700388	0	1.99076229945814	2.12520704909252	0	0	1.67598354048649	0	1.38054700437752	1.9891267505551	2.51615335692629	1.82764235530237	0	2.47397757925581	1.45591183197954	0	2.35277882971183	2.63933594582324	2.25088926712533	2.70516164150896	2.30510898111946	1.90035706071708	0	2.60733178829351	0	0	0	2.14893933617676	1.65820783880945	0	1.69641216920991	0	2.5809750428345	0	1.96237499240504	0	2.97312237002494	0	1.83159513585076	0	0	0
Kmt2c	1.07593735315205	1.34549899220371	0	2.34024664031611	2.07368788619427	1.54602136135724	2.22128588849634	0	1.83291754172156	0	0	0	2.29141179239592	2.64135083751663	2.26314385595782	1.93933903819439	2.6114142216782	2.78343635018663	1.82764235530237	2.47397757925581	0	1.45591183197954	0	0	0	2.88994685880331	0	2.30510898111946	0	2.56679750214283	1.98532411759619	0	1.91996529756053	2.59062182185687	0	0	0	0	0	2.5809750428345	2.65599788163814	2.58266956932763	1.86770977587311	2.32985368712411	0	1.83159513585076	2.86229517162776	0	0
Afap1	2.36684574406429	1.89914859896049	2.13254695967852	1.41777666095699	2.43634246842745	1.54602136135724	2.22128588849634	2.15464838700388	0	0	0	1.74383018970019	0	0	2.26314385595782	1.38054700437752	0	1.56728726629958	0	0	2.10977392952907	0	0	1.75048145574537	2.63933594582324	2.25088926712533	0	0	0	0	0	2.06763174829063	0	1.9697705634872	2.14893933617676	0	1.91353563432951	2.66465747126812	0	0	1.68881504459798	2.58266956932763	0	0	0	0	0	0	0
Tec	0	0	0	0	0	0	0	0	0	1.99076229945814	0	1.74383018970019	0	0	0	0	0	1.56728726629958	0	0	0	0	0	0	0	0	0	0	0	0	0	0	0	0	0	0	0	0	2.16039887906589	0	0	0	0	0	0	0	0	0	0
Rufy3	0	0	0	0	0	1.54602136135724	0	0	1.83291754172156	0	0	0	0	2.27089805024348	0	1.38054700437752	0	0	0	0	0	1.45591183197954	1.88172665405828	0	0	0	0	0	1.90035706071708	0	0	0	0	0	2.14893933617676	0	0	0	0	0	0	0	1.31821006104027	0	0	0	0	0	0
Anxa3	0	0	0	1.41777666095699	0	0	1.86863594734354	0	0	0	0	0	0	0	0	0	1.9891267505551	0	0	0	0	0	0	0	0	0	0	0	1.90035706071708	0	0	0	0	0	0	0	0	0	0	2.5809750428345	2.2850446887007	0	0	0	0	0	0	1.89697833179407	0
Cds1	0	0	0	0	0	0	0	0	0	0	0	0	0	0	0	0	0	0	0	0	0	0	0	0	2.01516306475125	2.25088926712533	0	0	0	0	0	0	0	0	0	0	0	0	0	0	0	0	0	0	0	0	0	0	0
Wdfy3	1.58216563210548	2.51449854005196	2.49769862269068	0	2.91154910985835	1.54602136135724	1.31901235403657	2.52069886019704	1.83291754172156	1.99076229945814	2.75679354111974	0	2.29141179239592	1.67598354048649	3.28988561019803	1.38054700437752	2.6114142216782	2.51615335692629	2.4369772841275	0	0	2.02508882896837	1.88172665405828	3.2103140632837	0	2.25088926712533	2.70516164150896	2.94709552721833	0	2.56679750214283	0	0	1.91996529756053	1.9697705634872	2.78201386269936	1.65820783880945	0	0	0	2.5809750428345	2.92596681773415	1.96237499240504	2.22030946179844	2.32985368712411	1.53736192508292	1.83159513585076	0	0	0
Ptpn13	1.07593735315205	0	0	0	0	0	1.31901235403657	1.57120184588599	0	0	0	0	0	0	0	0	0	2.15027894264002	0	0	0	0	0	1.75048145574537	2.63933594582324	2.25088926712533	0	0	0	0	0	0	0	0	0	0	0	0	0	1.9607996208036	1.68881504459798	0	0	2.32985368712411	0	0	2.86229517162776	0	0
Tgfbr3	1.58216563210548	2.89262551971509	2.87535594514573	2.34024664031611	1.49896467357776	2.12650693025845	3.43839638270415	1.57120184588599	2.44271233217692	3.66167975070079	3.14086644680827	0	0	2.64135083751663	3.28988561019803	2.55787098350466	2.6114142216782	1.56728726629958	0	2.47397757925581	0	0	1.88172665405828	1.75048145574537	2.01516306475125	2.25088926712533	0	2.30510898111946	0	0	2.60733178829351	2.06763174829063	2.53698058623264	1.9697705634872	0	0	2.53004053634353	0	0	0	2.65599788163814	2.58266956932763	3.24378468224852	0	1.53736192508292	1.83159513585076	0	0	2.84229485571925
Bicdl1	1.07593735315205	0	1.55141957711566	0	0	0	0	0	0	0	0	2.34549268838946	0	0	0	1.38054700437752	0	0	0	0	1.53108459818759	0	0	0	2.01516306475125	0	0	0	1.90035706071708	0	1.98532411759619	0	0	0	2.14893933617676	0	0	0	0	0	0	1.96237499240504	0	0	2.11680980684066	0	0	0	0
Tpcn1	0	0	0	0	0	0	1.31901235403657	0	0	1.99076229945814	0	0	0	0	0	0	0	0	0	0	0	0	0	0	0	0	0	0	1.90035706071708	1.61103983508343	0	2.06763174829063	0	0	0	0	0	0	0	0	0	0	1.31821006104027	0	0	0	0	0	0
Atxn2	1.07593735315205	2.72132906007639	1.05050045916668	0	0	2.12650693025845	1.86863594734354	2.15464838700388	0	1.99076229945814	2.12520704909252	0	2.93267413758685	0	0	1.93933903819439	0	1.56728726629958	0	2.47397757925581	1.53108459818759	2.38556280584336	2.49565373784495	0	2.01516306475125	0	3.08808814761517	0	1.90035706071708	1.61103983508343	0	0	1.91996529756053	0	0	0	2.53004053634353	1.69641216920991	2.79417860972536	1.9607996208036	1.68881504459798	1.96237499240504	1.31821006104027	2.32985368712411	0	0	2.22471274565542	0	0
Kdm2b	0	0	0	0	1.49896467357776	0	1.31901235403657	0	1.83291754172156	0	2.75679354111974	0	0	1.67598354048649	0	0	0	1.56728726629958	0	0	0	1.45591183197954	0	0	0	0	0	0	0	2.83509769274711	0	0	1.91996529756053	0	0	0	0	0	0	0	0	0	0	0	0	0	0	0	0
Psmd9	2.36684574406429	0	0	0	0	1.54602136135724	0	0	1.83291754172156	1.99076229945814	0	0	0	0	0	0	0	0	1.82764235530237	0	0	0	0	0	0	0	0	0	0	1.61103983508343	0	0	0	0	0	1.65820783880945	0	0	0	0	0	0	1.31821006104027	0	0	0	0	1.89697833179407	0
Clip1	0	0	1.05050045916668	0	0	0	1.31901235403657	0	0	0	0	0	0	0	2.26314385595782	0	0	0	0	0	0	0	0	0	0	0	0	0	0	0	0	0	0	0	2.14893933617676	0	0	0	0	0	0	0	0	0	0	0	0	0	2.2058037184276
Cux1	1.91666108955033	2.25342706793153	1.88361594048484	0	1.49896467357776	1.54602136135724	2.68775430148231	3.17281392188258	1.83291754172156	2.61316976459608	2.12520704909252	2.34549268838946	2.93267413758685	0	0	1.93933903819439	1.9891267505551	0	0	0	2.47397757925581	0	0	2.35277882971183	2.01516306475125	0	0	0	0	0	1.98532411759619	0	0	0	2.14893933617676	0	1.91353563432951	2.29341174306379	0	1.9607996208036	2.65599788163814	3.62958708665427	1.31821006104027	0	0	1.83159513585076	0	0	2.84229485571925
Sdk1	1.58216563210548	0	0	0	3.57712393962582	0	1.86863594734354	2.15464838700388	2.81877445741025	0	0	0	0	0	0	1.38054700437752	2.99209791702142	2.15027894264002	0	0	2.10977392952907	1.45591183197954	0	0	2.63933594582324	0	0	0	4.2378586689599	0	1.98532411759619	0	0	1.9697705634872	2.78201386269936	0	0	1.69641216920991	2.16039887906589	0	0	2.58266956932763	2.48047245816107	0	0	0	0	0	2.2058037184276
Baiap2l1	0	0	0	0	1.49896467357776	0	0	0	0	0	0	1.74383018970019	0	0	0	0	0	0	0	0	1.53108459818759	1.45591183197954	0	0	0	0	0	0	0	0	0	0	0	0	0	0	0	1.69641216920991	0	0	0	0	0	0	0	0	0	0	0
Lnx2	1.07593735315205	0	1.55141957711566	0	0	0	1.86863594734354	1.57120184588599	2.81877445741025	0	0	0	3.32022831912849	0	2.26314385595782	0	2.99209791702142	2.51615335692629	0	0	1.53108459818759	0	1.88172665405828	1.75048145574537	0	0	0	0	1.90035706071708	0	0	2.06763174829063	0	1.9697705634872	0	0	0	1.69641216920991	0	0	1.68881504459798	1.96237499240504	0	0	0	0	0	0	0
Ahcyl2	1.91666108955033	1.89914859896049	0	1.41777666095699	0	2.12650693025845	1.86863594734354	2.15464838700388	0	0	0	0	0	0	2.26314385595782	1.93933903819439	2.6114142216782	2.51615335692629	0	0	2.47397757925581	2.64996674108913	1.88172665405828	0	2.01516306475125	3.55491101976925	0	0	1.90035706071708	0	0	0	0	1.9697705634872	0	0	0	0	0	0	2.2850446887007	1.96237499240504	1.31821006104027	0	0	1.83159513585076	2.22471274565542	1.89697833179407	2.2058037184276
Cald1	1.07593735315205	2.51449854005196	2.13254695967852	0	1.49896467357776	2.12650693025845	1.86863594734354	1.57120184588599	0	3.4844829050749	2.12520704909252	1.74383018970019	0	1.67598354048649	0	1.93933903819439	0	2.51615335692629	2.81286777189737	2.47397757925581	2.10977392952907	2.38556280584336	3.14670595881875	1.75048145574537	0	0	0	2.94709552721833	2.51580470673591	1.61103983508343	0	0	2.91572351951435	0	0	2.62101564260524	1.91353563432951	1.69641216920991	0	1.9607996208036	0	0	3.00355599440811	0	1.53736192508292	0	0	3.16390797782261	2.2058037184276
Hipk2	0	0	0	0	0	0	0	0	0	0	0	0	0	0	0	0	0	0	0	0	0	0	0	0	2.01516306475125	0	0	0	0	0	1.98532411759619	0	0	0	0	0	0	0	0	0	0	0	0	0	0	0	0	0	0
Dennd2a	1.07593735315205	0	1.05050045916668	0	0	1.54602136135724	0	0	0	0	0	1.74383018970019	0	2.27089805024348	0	0	0	2.15027894264002	0	2.47397757925581	2.10977392952907	0	1.88172665405828	1.75048145574537	0	3.55491101976925	0	0	0	2.19900433308965	1.98532411759619	0	0	1.9697705634872	0	2.89034814709658	0	0	0	1.9607996208036	0	0	1.31821006104027	0	0	1.83159513585076	0	1.89697833179407	2.2058037184276
Jazf1	2.1668756163322	2.89262551971509	3.06571987848673	1.98181008988843	2.43634246842745	2.4914093412497	2.22128588849634	2.99883458564502	0	1.99076229945814	2.12520704909252	3.37810762098967	0	1.67598354048649	0	1.38054700437752	0	2.15027894264002	2.4369772841275	3.79500055002248	2.10977392952907	2.02508882896837	3.14670595881875	2.35277882971183	2.63933594582324	2.25088926712533	3.08808814761517	0	2.51580470673591	2.19900433308965	0	0	3.40464505983365	3.24556160483345	3.16662513452432	2.89034814709658	0	1.69641216920991	0	0	2.2850446887007	2.58266956932763	1.31821006104027	2.97312237002494	1.53736192508292	1.83159513585076	0	1.89697833179407	3.22813812817313
Tcf7l1	2.1668756163322	1.34549899220371	0	0	0	0	0	0	0	0	0	1.74383018970019	2.29141179239592	3.57661709842463	0	1.38054700437752	2.99209791702142	2.51615335692629	0	0	2.10977392952907	2.85887879069998	1.88172665405828	1.75048145574537	3.51183652857604	2.25088926712533	0	0	0	2.83509769274711	0	2.06763174829063	0	3.46088532368559	0	0	2.90859484481995	2.66465747126812	0	2.5809750428345	3.138329901459	1.96237499240504	2.48047245816107	2.32985368712411	0	2.44127489383508	2.22471274565542	3.37856355483282	0
Dysf	2.1668756163322	0	0	1.98181008988843	0	0	1.86863594734354	2.15464838700388	1.83291754172156	1.99076229945814	0	0	2.29141179239592	1.67598354048649	2.26314385595782	1.38054700437752	2.99209791702142	2.99413767964763	1.82764235530237	0	2.10977392952907	0	0	1.75048145574537	3.51183652857604	2.88994685880331	2.0767337617138	0	1.90035706071708	2.19900433308965	0	2.69544810697013	0	1.9697705634872	0	0	0	0	2.79417860972536	2.5809750428345	1.68881504459798	0	1.31821006104027	2.97312237002494	1.53736192508292	0	0	1.89697833179407	0
Iqsec1	1.58216563210548	1.89914859896049	1.88361594048484	0	0	2.12650693025845	1.31901235403657	1.57120184588599	3.30543892212377	1.99076229945814	2.12520704909252	2.71850347605744	2.29141179239592	2.91105605595869	3.28988561019803	1.38054700437752	1.9891267505551	3.66192613174638	1.82764235530237	2.47397757925581	2.10977392952907	2.38556280584336	1.88172665405828	0	2.01516306475125	2.25088926712533	2.70516164150896	3.3349084325076	2.51580470673591	1.61103983508343	1.98532411759619	0	0	0	2.14893933617676	0	1.91353563432951	3.47135759925136	3.17904464145577	3.2355372264227	3.31339936782539	0	1.31821006104027	2.97312237002494	2.48130875585591	0	2.86229517162776	1.89697833179407	0
Srgap3	0	0	2.33169797722837	3.13094156644315	2.43634246842745	2.12650693025845	1.86863594734354	3.17281392188258	2.81877445741025	2.61316976459608	3.41767832420624	2.98955466600737	0	1.67598354048649	3.96422802876736	1.38054700437752	1.9891267505551	2.78343635018663	0	3.12408724813577	2.74037240642779	1.45591183197954	2.49565373784495	2.99720597304345	2.01516306475125	3.27671181519971	2.0767337617138	0	2.89396786284092	2.19900433308965	1.98532411759619	2.69544810697013	1.91996529756053	2.59062182185687	0	1.65820783880945	0	0	2.16039887906589	0	0	0	1.31821006104027	2.32985368712411	1.53736192508292	1.83159513585076	0	1.89697833179407	0
Vgll4	0	0	1.05050045916668	1.41777666095699	0	0	1.31901235403657	0	1.83291754172156	0	0	0	0	0	2.90287816213688	2.29568429039192	0	0	0	0	1.53108459818759	0	0	1.75048145574537	0	0	0	0	0	0	0	0	1.91996529756053	0	0	1.65820783880945	0	0	0	0	0	0	0	0	0	0	2.22471274565542	0	0
Tspan9	1.07593735315205	1.34549899220371	1.05050045916668	2.98404396159402	2.43634246842745	1.54602136135724	2.22128588849634	2.15464838700388	1.83291754172156	0	3.14086644680827	0	0	1.67598354048649	0	0	0	0	1.82764235530237	0	1.53108459818759	0	2.49565373784495	3.53519251070246	2.01516306475125	2.25088926712533	0	0	0	0	0	0	0	0	0	0	0	0	0	1.9607996208036	2.2850446887007	1.96237499240504	1.31821006104027	0	2.11680980684066	0	2.86229517162776	0	0
Eps8	0	1.89914859896049	0	0	1.49896467357776	0	0	0	0	2.61316976459608	2.12520704909252	1.74383018970019	0	1.67598354048649	0	2.55787098350466	0	2.99413767964763	0	0	2.47397757925581	2.38556280584336	0	0	2.01516306475125	0	2.70516164150896	0	0	1.61103983508343	0	0	0	0	0	0	1.91353563432951	2.93478048241059	0	0	0	0	0	2.32985368712411	1.53736192508292	0	0	1.89697833179407	0
C2cd5	0	1.34549899220371	0	0	0	1.54602136135724	0	1.57120184588599	0	0	0	0	0	0	0	0	2.6114142216782	0	0	0	0	1.45591183197954	1.88172665405828	1.75048145574537	0	0	0	0	0	1.61103983508343	0	0	0	0	0	0	0	2.29341174306379	0	0	1.68881504459798	0	0	0	0	2.81729409483669	2.22471274565542	0	0
Leng8	1.07593735315205	1.34549899220371	1.55141957711566	0	1.49896467357776	1.54602136135724	0	1.57120184588599	1.83291754172156	2.61316976459608	0	0	0	0	0	0	0	1.56728726629958	0	0	0	0	0	1.75048145574537	0	0	2.0767337617138	0	0	0	1.98532411759619	0	0	2.97077821408116	0	1.65820783880945	0	0	0	0	1.68881504459798	0	0	0	0	0	0	0	0
Zim1	0	0	0	0	1.49896467357776	0	1.31901235403657	0	0	0	0	0	2.29141179239592	0	0	0	0	0	0	0	0	0	0	2.35277882971183	0	0	0	0	1.90035706071708	0	0	0	0	0	0	0	0	0	0	0	1.68881504459798	0	0	0	0	0	0	0	2.2058037184276
Peg3	1.58216563210548	3.47324280166051	1.05050045916668	0	2.07368788619427	2.12650693025845	2.48147611469121	2.15464838700388	3.30543892212377	0	2.75679354111974	2.34549268838946	0	0	2.26314385595782	0	2.99209791702142	2.15027894264002	1.82764235530237	2.47397757925581	2.10977392952907	0	1.88172665405828	3.66507310424284	3.29612579984049	3.27671181519971	0	2.30510898111946	3.38240221030677	0	1.98532411759619	2.06763174829063	0	0	0	0	3.18254498169763	1.69641216920991	2.16039887906589	0	0	2.58266956932763	2.68673356565757	0	1.53736192508292	1.83159513585076	2.22471274565542	3.16390797782261	2.2058037184276
Akap13	1.07593735315205	0	1.05050045916668	0	1.49896467357776	1.54602136135724	0	2.52069886019704	1.83291754172156	0	2.12520704909252	1.74383018970019	0	1.67598354048649	0	1.38054700437752	0	2.15027894264002	0	0	0	0	3.36121362472896	1.75048145574537	0	0	0	2.30510898111946	1.90035706071708	1.61103983508343	0	2.06763174829063	0	0	0	0	0	0	2.16039887906589	2.5809750428345	1.68881504459798	0	0	0	0	1.83159513585076	0	0	0
Ppfibp2	0	1.34549899220371	0	0	1.49896467357776	1.54602136135724	0	1.57120184588599	0	1.99076229945814	0	0	0	0	0	1.38054700437752	1.9891267505551	0	0	0	0	0	0	0	0	0	0	0	0	0	0	2.69544810697013	0	1.9697705634872	2.14893933617676	0	0	1.69641216920991	0	0	1.68881504459798	1.96237499240504	0	0	1.53736192508292	1.83159513585076	0	1.89697833179407	0
Parva	2.53341453263154	2.25342706793153	2.97506089197832	3.37250266225457	3.08476409300719	1.54602136135724	2.85867215740902	2.15464838700388	1.83291754172156	1.99076229945814	2.12520704909252	2.71850347605744	2.29141179239592	0	3.28988561019803	1.93933903819439	1.9891267505551	2.51615335692629	2.4369772841275	2.47397757925581	2.74037240642779	2.02508882896837	1.88172665405828	0	2.01516306475125	3.77232138408835	2.70516164150896	2.30510898111946	0	2.19900433308965	0	3.07815209415603	2.91572351951435	1.9697705634872	0	3.42586580757282	3.39735793877698	1.69641216920991	2.79417860972536	0	3.138329901459	1.96237499240504	1.31821006104027	0	2.11680980684066	2.81729409483669	0	1.89697833179407	0
Tead1	1.07593735315205	0	1.55141957711566	0	1.49896467357776	0	1.31901235403657	0	1.83291754172156	0	0	1.74383018970019	0	0	2.26314385595782	0	1.9891267505551	0	0	0	1.53108459818759	0	2.49565373784495	2.72602906103627	2.01516306475125	0	0	0	0	0	1.98532411759619	0	0	0	3.16662513452432	0	0	1.69641216920991	0	2.96088294434551	1.68881504459798	1.96237499240504	0	0	0	0	0	0	2.2058037184276
Plekha7	2.1668756163322	2.51449854005196	1.55141957711566	0	2.43634246842745	1.54602136135724	2.48147611469121	0	1.83291754172156	0	0	2.34549268838946	2.29141179239592	2.27089805024348	2.90287816213688	1.38054700437752	1.9891267505551	0	1.82764235530237	3.12408724813577	2.74037240642779	3.03159889967274	1.88172665405828	2.35277882971183	3.51183652857604	0	0	0	3.38240221030677	1.61103983508343	2.60733178829351	3.35425633554896	1.91996529756053	0	2.14893933617676	3.10231813251962	2.53004053634353	2.29341174306379	2.16039887906589	0	2.65599788163814	2.96262129824963	2.48047245816107	2.32985368712411	2.11680980684066	1.83159513585076	2.22471274565542	1.89697833179407	2.84229485571925
Fgfr2	1.07593735315205	1.89914859896049	0	1.41777666095699	0	0	0	0	1.83291754172156	0	2.12520704909252	0	0	1.67598354048649	0	0	1.9891267505551	2.51615335692629	0	0	0	0	0	0	2.01516306475125	0	2.0767337617138	0	2.89396786284092	0	0	2.06763174829063	0	0	0	0	0	2.66465747126812	0	0	0	0	0	2.32985368712411	2.11680980684066	1.83159513585076	0	0	0
Tacc2	1.58216563210548	0	1.05050045916668	1.41777666095699	1.49896467357776	1.54602136135724	0	2.15464838700388	0	0	0	0	0	0	0	1.38054700437752	0	1.56728726629958	2.4369772841275	0	0	0	0	0	0	0	0	0	1.90035706071708	1.61103983508343	1.98532411759619	0	2.53698058623264	0	0	1.65820783880945	1.91353563432951	1.69641216920991	0	1.9607996208036	1.68881504459798	1.96237499240504	0	0	1.53736192508292	0	2.86229517162776	0	2.2058037184276
Eps8l2	2.1668756163322	0	2.13254695967852	2.34024664031611	1.49896467357776	1.54602136135724	1.31901235403657	2.15464838700388	2.81877445741025	2.99389746869899	3.14086644680827	2.34549268838946	0	1.67598354048649	2.26314385595782	0	1.9891267505551	2.51615335692629	1.82764235530237	0	1.53108459818759	2.02508882896837	3.14670595881875	2.72602906103627	2.01516306475125	0	0	0	2.89396786284092	0	1.98532411759619	0	0	1.9697705634872	3.16662513452432	1.65820783880945	2.53004053634353	3.14723867129186	0	0	1.68881504459798	0	1.86770977587311	3.36139270087774	1.53736192508292	1.83159513585076	2.86229517162776	1.89697833179407	2.2058037184276
Ap2a2	0	0	1.55141957711566	1.98181008988843	0	0	0	0	0	0	0	0	2.29141179239592	0	0	1.38054700437752	0	1.56728726629958	0	0	0	0	0	0	0	0	0	0	2.51580470673591	2.19900433308965	0	0	0	0	0	0	0	1.69641216920991	2.16039887906589	1.9607996208036	0	0	0	0	1.53736192508292	0	0	1.89697833179407	0
Ppfia1	1.07593735315205	0	1.05050045916668	1.98181008988843	1.49896467357776	0	0	1.57120184588599	0	0	0	0	2.93267413758685	0	2.26314385595782	1.93933903819439	0	1.56728726629958	1.82764235530237	0	0	2.02508882896837	1.88172665405828	1.75048145574537	0	0	0	0	0	1.61103983508343	0	0	0	0	2.14893933617676	0	0	0	0	0	2.2850446887007	0	2.48047245816107	0	0	1.83159513585076	2.22471274565542	0	0
Utrn	2.53341453263154	2.25342706793153	1.05050045916668	2.98404396159402	2.07368788619427	1.54602136135724	2.48147611469121	2.15464838700388	1.83291754172156	2.61316976459608	0	1.74383018970019	0	2.64135083751663	2.90287816213688	2.29568429039192	0	0	0	0	0	2.02508882896837	1.88172665405828	2.35277882971183	0	2.25088926712533	0	0	1.90035706071708	2.56679750214283	1.98532411759619	0	1.91996529756053	3.24556160483345	0	2.25126943049447	0	0	0	2.5809750428345	1.68881504459798	1.96237499240504	1.31821006104027	2.32985368712411	2.11680980684066	2.44127489383508	0	0	2.84229485571925
Plagl1	1.07593735315205	0	0	0	0	1.54602136135724	0	0	0	0	0	0	0	0	0	0	0	0	0	0	0	0	0	1.75048145574537	0	0	0	0	2.51580470673591	0	0	0	0	0	0	0	0	0	0	0	0	0	0	0	1.53736192508292	0	0	0	0
Hivep2	0	0	0	0	0	0	0	0	0	0	0	0	0	1.67598354048649	2.26314385595782	0	0	0	0	0	0	0	1.88172665405828	1.75048145574537	2.01516306475125	0	0	0	1.90035706071708	0	0	0	0	0	2.14893933617676	0	0	0	0	0	0	0	0	2.97312237002494	0	0	0	0	0
Sesn1	0	0	0	1.41777666095699	2.07368788619427	1.54602136135724	0	0	0	1.99076229945814	0	1.74383018970019	0	0	0	0	1.9891267505551	2.78343635018663	2.4369772841275	0	0	2.85887879069998	1.88172665405828	0	0	2.25088926712533	0	0	1.90035706071708	1.61103983508343	0	3.35425633554896	1.91996529756053	0	0	0	1.91353563432951	0	0	1.9607996208036	0	1.96237499240504	1.86770977587311	0	2.95810853145891	1.83159513585076	0	2.89021436433324	0
Slc41a2	0	0	0	0	0	0	0	0	0	0	0	0	0	0	0	0	0	0	0	0	0	0	0	0	2.01516306475125	0	0	0	0	0	0	0	0	0	0	0	0	0	0	0	0	0	0	0	0	0	0	0	0
Tmcc3	1.58216563210548	1.34549899220371	0	0	1.49896467357776	0	0	0	1.83291754172156	0	0	0	2.29141179239592	0	0	0	0	2.78343635018663	0	0	1.53108459818759	0	2.49565373784495	1.75048145574537	3.02071029689994	0	0	2.94709552721833	1.90035706071708	0	0	0	0	1.9697705634872	0	0	0	1.69641216920991	0	0	2.2850446887007	0	0	0	0	0	0	0	2.2058037184276
Kitl	1.58216563210548	0	1.05050045916668	0	0	2.12650693025845	0	0	0	0	0	0	0	2.27089805024348	2.26314385595782	0	0	0	1.82764235530237	0	1.53108459818759	0	0	2.35277882971183	0	0	0	0	0	0	0	0	0	0	0	0	1.91353563432951	1.69641216920991	0	0	0	0	1.31821006104027	0	0	0	0	0	0
Msrb3	0	0	0	0	0	2.4914093412497	0	1.57120184588599	0	0	0	0	0	0	0	0	1.9891267505551	0	0	0	0	0	0	0	0	0	0	0	0	0	0	0	0	0	0	0	0	0	0	0	0	0	0	0	0	0	0	0	0
Rbms2	1.91666108955033	0	1.05050045916668	0	1.49896467357776	2.12650693025845	1.31901235403657	0	1.83291754172156	0	0	2.71850347605744	2.93267413758685	0	3.56820950338742	1.38054700437752	0	2.15027894264002	0	2.47397757925581	0	0	0	1.75048145574537	2.01516306475125	0	0	2.30510898111946	2.89396786284092	1.61103983508343	1.98532411759619	2.06763174829063	1.91996529756053	0	2.78201386269936	1.65820783880945	1.91353563432951	2.66465747126812	0	0	1.68881504459798	2.58266956932763	1.86770977587311	0	0	1.83159513585076	3.24853074860739	0	0
Atp11a	1.58216563210548	2.25342706793153	1.05050045916668	1.98181008988843	1.49896467357776	1.54602136135724	0	2.15464838700388	0	2.61316976459608	2.12520704909252	1.74383018970019	0	0	0	1.38054700437752	1.9891267505551	2.99413767964763	1.82764235530237	0	0	2.02508882896837	2.49565373784495	1.75048145574537	0	0	0	0	2.51580470673591	0	0	2.69544810697013	0	0	2.78201386269936	0	0	2.66465747126812	2.16039887906589	0	0	1.96237499240504	0	0	1.53736192508292	0	0	0	0
Mtus1	1.07593735315205	0	0	0	0	0	0	0	0	0	0	0	0	0	0	0	2.6114142216782	1.56728726629958	0	0	0	0	0	0	0	0	0	0	0	0	0	0	1.91996529756053	0	0	0	0	1.69641216920991	0	0	0	0	0	0	0	0	0	0	0
Wwc2	0	2.25342706793153	2.13254695967852	2.60355817831654	0	1.54602136135724	0	1.57120184588599	0	1.99076229945814	0	2.34549268838946	2.29141179239592	1.67598354048649	0	1.38054700437752	1.9891267505551	2.15027894264002	0	2.47397757925581	0	1.45591183197954	1.88172665405828	0	2.01516306475125	0	0	0	2.89396786284092	0	0	0	2.53698058623264	2.59062182185687	2.14893933617676	0	2.90859484481995	0	0	2.5809750428345	1.68881504459798	0	2.48047245816107	2.32985368712411	1.53736192508292	0	0	1.89697833179407	0
Arhgap10	3.01197003770463	3.03882603952304	3.29684164221648	2.81178913370242	3.08476409300719	2.75817590126603	3.34629267128739	3.66674337826921	3.48162786158898	3.26897751197573	2.12520704909252	2.98955466600737	2.29141179239592	1.67598354048649	0	0	3.4826465252231	3.55941521835931	3.08542793606403	3.12408724813577	3.40071417314828	3.17883451862591	2.49565373784495	2.72602906103627	2.63933594582324	3.77232138408835	3.08808814761517	3.83138445240398	3.38240221030677	3.2207978243387	1.98532411759619	3.74800799473286	1.91996529756053	3.91904333904811	3.44371490765316	0	1.91353563432951	3.47135759925136	2.16039887906589	3.2355372264227	2.65599788163814	2.58266956932763	2.85763970874937	0	3.71783881569723	1.83159513585076	3.74370199193681	2.89021436433324	2.84229485571925
Kifc3	0	0	0	0	0	1.54602136135724	0	0	0	0	0	0	2.29141179239592	1.67598354048649	2.26314385595782	0	0	1.56728726629958	0	0	0	0	0	0	0	0	0	0	0	0	0	0	0	0	0	0	0	0	0	0	0	0	1.31821006104027	0	0	0	0	0	0
Cmtm4	0	0	0	0	0	0	0	1.57120184588599	1.83291754172156	2.99389746869899	0	1.74383018970019	0	0	0	0	0	1.56728726629958	0	0	0	0	0	0	0	0	0	0	0	0	0	0	0	0	0	0	0	0	0	0	1.68881504459798	0	0	2.32985368712411	0	0	0	1.89697833179407	0
Pard3	2.53341453263154	2.72132906007639	2.76459768562531	3.37250266225457	3.08476409300719	2.96855689163298	3.43839638270415	2.15464838700388	3.09142435139618	3.26897751197573	0	3.37810762098967	0	3.29821521770717	2.26314385595782	2.55787098350466	3.81030114748305	4.43627553419248	2.4369772841275	0	3.12408724813577	3.30714805303905	3.14670595881875	3.8830830411626	3.29612579984049	3.27671181519971	2.70516164150896	2.30510898111946	0	3.36922886476167	3.26291675365922	3.35425633554896	0	2.59062182185687	2.78201386269936	3.10231813251962	1.91353563432951	2.93478048241059	2.79417860972536	3.45078185013063	3.46233759315676	3.23729835533857	3.00355599440811	3.36139270087774	2.48130875585591	3.08992155079524	0	3.70524620163808	4.05252920964931
Thrb	0	0	0	0	0	0	0	0	0	0	0	0	0	0	0	0	0	0	0	0	0	0	0	0	0	0	0	0	1.90035706071708	1.61103983508343	0	0	0	0	0	0	0	0	0	0	0	0	0	0	0	0	0	0	0
Dlg5	1.07593735315205	0	0	0	2.70191178897047	0	0	1.57120184588599	0	0	2.12520704909252	0	0	0	0	0	0	0	0	3.12408724813577	0	0	0	1.75048145574537	0	0	0	0	0	1.61103983508343	1.98532411759619	0	0	0	0	0	0	1.69641216920991	0	0	0	0	0	2.32985368712411	0	0	0	0	0
Arhgef3	1.07593735315205	0	0	1.41777666095699	1.49896467357776	0	1.31901235403657	1.57120184588599	0	0	2.12520704909252	2.34549268838946	2.29141179239592	1.67598354048649	0	1.38054700437752	0	1.56728726629958	2.4369772841275	0	0	2.38556280584336	0	0	0	0	0	0	1.90035706071708	0	0	0	0	1.9697705634872	0	1.65820783880945	0	1.69641216920991	2.16039887906589	0	0	2.96262129824963	2.48047245816107	0	0	2.44127489383508	0	2.512152484619	0
Nisch	1.58216563210548	1.89914859896049	0	1.41777666095699	2.43634246842745	0	1.31901235403657	0	0	0	2.12520704909252	1.74383018970019	0	2.27089805024348	0	1.38054700437752	1.9891267505551	1.56728726629958	0	0	1.53108459818759	0	1.88172665405828	2.35277882971183	2.01516306475125	2.88994685880331	0	0	2.51580470673591	2.56679750214283	2.60733178829351	2.06763174829063	0	0	0	1.65820783880945	0	1.69641216920991	0	0	2.65599788163814	0	1.86770977587311	0	1.53736192508292	0	0	0	0
Samd4	0	0	0	0	0	0	0	0	0	0	0	0	0	0	0	0	1.9891267505551	0	0	0	0	0	0	0	0	0	0	0	0	0	0	0	0	0	0	0	0	1.69641216920991	0	0	0	0	0	0	1.53736192508292	0	0	0	0
Parp4	2.36684574406429	2.51449854005196	1.05050045916668	1.41777666095699	2.70191178897047	0	1.86863594734354	0	1.83291754172156	1.99076229945814	0	0	2.29141179239592	0	0	0	2.6114142216782	1.56728726629958	0	0	0	2.38556280584336	2.87325333791181	2.35277882971183	0	0	0	0	1.90035706071708	0	2.60733178829351	0	0	1.9697705634872	2.14893933617676	0	0	0	0	1.9607996208036	2.2850446887007	0	0	0	2.48130875585591	0	0	1.89697833179407	0
Kif13b	1.07593735315205	1.34549899220371	1.88361594048484	0	0	1.54602136135724	1.31901235403657	2.15464838700388	0	0	0	1.74383018970019	0	1.67598354048649	0	0	1.9891267505551	0	1.82764235530237	0	0	1.45591183197954	2.49565373784495	0	0	2.88994685880331	0	0	0	0	0	0	1.91996529756053	0	0	0	0	0	0	1.9607996208036	0	0	0	0	1.53736192508292	1.83159513585076	2.22471274565542	0	2.2058037184276
Rb1	0	0	0	0	0	0	1.31901235403657	0	0	0	0	0	0	0	0	1.38054700437752	0	0	0	0	0	0	0	0	0	0	0	0	1.90035706071708	0	0	0	0	0	0	0	0	0	0	0	0	0	0	0	0	0	0	0	0
Lrch1	0	0	1.05050045916668	0	2.43634246842745	1.54602136135724	0	2.78807531279701	3.09142435139618	1.99076229945814	0	1.74383018970019	0	1.67598354048649	0	0	2.99209791702142	1.56728726629958	0	0	1.53108459818759	2.02508882896837	0	0	2.01516306475125	0	2.0767337617138	0	0	1.61103983508343	0	0	0	1.9697705634872	2.14893933617676	1.65820783880945	1.91353563432951	1.69641216920991	2.16039887906589	0	2.2850446887007	0	0	0	0	1.83159513585076	2.86229517162776	0	0
Elf1	1.07593735315205	1.34549899220371	1.55141957711566	0	2.07368788619427	1.54602136135724	0	2.52069886019704	1.83291754172156	1.99076229945814	0	2.34549268838946	0	0	0	0	0	0	0	0	0	0	3.14670595881875	1.75048145574537	2.01516306475125	0	0	2.30510898111946	0	1.61103983508343	0	2.06763174829063	0	0	2.78201386269936	0	0	0	0	2.5809750428345	1.68881504459798	0	0	2.32985368712411	0	0	2.86229517162776	0	0
Diaph3	1.91666108955033	2.25342706793153	1.55141957711566	1.98181008988843	0	0	1.31901235403657	2.15464838700388	0	2.61316976459608	2.12520704909252	0	0	1.67598354048649	0	2.93717365392318	0	0	3.29938734827684	2.47397757925581	2.74037240642779	2.64996674108913	0	0	0	2.25088926712533	2.70516164150896	0	0	2.19900433308965	2.98791283656216	0	2.53698058623264	1.9697705634872	0	2.25126943049447	0	1.69641216920991	3.17904464145577	1.9607996208036	0	0	1.86770977587311	2.32985368712411	1.53736192508292	2.81729409483669	0	0	2.84229485571925
Tbc1d4	0	0	0	0	0	0	0	2.15464838700388	0	0	0	0	0	0	0	0	0	0	0	0	0	0	0	1.75048145574537	2.01516306475125	0	0	0	0	0	0	0	0	0	0	0	0	0	0	0	1.68881504459798	0	0	0	0	0	0	0	0
Lmo7	0	0	0	1.98181008988843	0	1.54602136135724	0	0	0	0	0	0	0	0	0	1.38054700437752	0	0	0	0	0	0	1.88172665405828	0	0	0	0	0	0	1.61103983508343	0	0	0	0	0	0	0	0	0	0	1.68881504459798	0	0	0	0	0	0	0	0
Mycbp2	0	1.34549899220371	1.55141957711566	2.60355817831654	1.49896467357776	0	0	1.57120184588599	2.44271233217692	0	0	1.74383018970019	2.93267413758685	1.67598354048649	0	1.38054700437752	2.6114142216782	2.51615335692629	2.4369772841275	0	2.10977392952907	0	2.87325333791181	2.35277882971183	0	2.25088926712533	0	2.30510898111946	1.90035706071708	2.56679750214283	2.98791283656216	2.69544810697013	0	2.59062182185687	0	0	0	1.69641216920991	2.79417860972536	2.5809750428345	2.2850446887007	2.58266956932763	1.31821006104027	0	1.53736192508292	2.44127489383508	0	1.89697833179407	0
Clybl	1.07593735315205	1.34549899220371	0	1.41777666095699	2.70191178897047	0	0	1.57120184588599	0	1.99076229945814	0	0	0	1.67598354048649	0	1.38054700437752	0	0	0	0	1.53108459818759	1.45591183197954	0	0	0	2.88994685880331	0	0	1.90035706071708	0	2.60733178829351	2.06763174829063	0	0	0	0	0	0	0	0	0	0	1.31821006104027	0	1.53736192508292	1.83159513585076	0	0	0
Bmper	0	0	0	0	2.07368788619427	0	0	0	0	0	0	0	0	0	0	0	0	0	1.82764235530237	0	0	0	0	1.75048145574537	0	0	0	0	1.90035706071708	0	0	0	0	0	0	0	0	0	0	0	0	0	0	0	0	0	0	0	0
Kirrel3	0	0	0	0	1.49896467357776	0	0	0	0	0	0	0	0	0	0	0	1.9891267505551	0	0	0	0	0	0	0	0	0	0	0	0	0	0	0	0	0	0	0	0	0	0	0	0	0	0	0	0	0	0	0	0
Sik3	1.07593735315205	0	0	0	1.49896467357776	0	0	0	1.83291754172156	0	0	1.74383018970019	2.29141179239592	2.27089805024348	0	0	2.6114142216782	2.15027894264002	2.4369772841275	0	0	0	2.87325333791181	0	2.01516306475125	0	2.70516164150896	0	0	1.61103983508343	0	0	2.53698058623264	0	0	1.65820783880945	0	1.69641216920991	0	0	2.2850446887007	0	2.22030946179844	0	0	0	2.22471274565542	1.89697833179407	0
Dmxl2	0	0	0	1.41777666095699	0	1.54602136135724	1.31901235403657	0	0	0	2.12520704909252	0	2.29141179239592	0	0	1.93933903819439	0	0	0	0	0	0	0	1.75048145574537	0	0	0	0	0	0	0	0	0	0	0	1.65820783880945	0	0	0	0	1.68881504459798	0	0	0	0	1.83159513585076	2.22471274565542	0	0
Stra6	0	0	1.55141957711566	1.98181008988843	2.07368788619427	1.54602136135724	1.31901235403657	0	2.44271233217692	1.99076229945814	0	0	0	0	0	0	2.6114142216782	2.15027894264002	0	2.47397757925581	2.10977392952907	0	0	1.75048145574537	0	0	0	0	2.89396786284092	1.61103983508343	1.98532411759619	0	0	0	3.16662513452432	0	1.91353563432951	0	0	0	2.2850446887007	0	0	0	0	2.44127489383508	2.22471274565542	0	0
Uaca	1.91666108955033	1.89914859896049	2.13254695967852	1.41777666095699	0	0	1.31901235403657	0	0	1.99076229945814	0	0	2.29141179239592	1.67598354048649	0	0	2.6114142216782	1.56728726629958	1.82764235530237	0	0	0	0	0	2.63933594582324	0	0	2.30510898111946	1.90035706071708	1.61103983508343	0	0	0	0	3.66044880314916	0	0	1.69641216920991	0	0	0	1.96237499240504	1.31821006104027	0	0	1.83159513585076	0	0	2.2058037184276
Snap91	0	0	0	0	1.49896467357776	1.54602136135724	0	1.57120184588599	0	0	0	0	0	0	0	0	1.9891267505551	1.56728726629958	0	0	0	0	0	1.75048145574537	0	0	0	0	2.89396786284092	0	0	0	0	0	0	0	0	0	0	0	1.68881504459798	0	0	0	0	0	0	0	0
Ppp2r3a	2.36684574406429	1.34549899220371	1.55141957711566	2.34024664031611	0	1.54602136135724	1.31901235403657	0	0	0	3.41767832420624	0	0	1.67598354048649	0	1.38054700437752	1.9891267505551	2.15027894264002	1.82764235530237	0	0	2.64996674108913	1.88172665405828	1.75048145574537	2.01516306475125	2.88994685880331	0	0	0	1.61103983508343	0	0	1.91996529756053	0	0	0	2.53004053634353	1.69641216920991	0	0	1.68881504459798	2.58266956932763	2.22030946179844	2.32985368712411	2.11680980684066	2.81729409483669	2.22471274565542	0	2.2058037184276
Slco2a1	0	0	0	0	0	0	1.31901235403657	0	0	0	0	1.74383018970019	0	0	0	0	0	0	0	0	0	0	0	0	0	0	0	0	0	0	0	0	0	0	0	0	0	0	0	0	0	0	0	0	0	0	0	0	0
Limk2	1.07593735315205	0	0	1.41777666095699	2.07368788619427	0	0	1.57120184588599	1.83291754172156	2.61316976459608	0	2.71850347605744	2.29141179239592	1.67598354048649	0	1.38054700437752	1.9891267505551	1.56728726629958	1.82764235530237	3.12408724813577	1.53108459818759	0	1.88172665405828	0	2.01516306475125	2.25088926712533	0	0	0	1.61103983508343	0	3.07815209415603	0	0	0	0	0	2.29341174306379	0	2.5809750428345	2.65599788163814	0	1.31821006104027	0	0	2.81729409483669	0	0	0
Osbp2	0	0	0	0	0	0	0	0	0	0	0	0	0	0	0	0	0	0	0	0	0	0	0	0	0	0	0	0	0	0	0	0	0	0	0	0	0	0	0	0	0	0	0	0	0	0	2.22471274565542	0	0
Tns3	2.1668756163322	1.89914859896049	1.05050045916668	0	0	0	0	0	2.44271233217692	0	0	1.74383018970019	2.29141179239592	1.67598354048649	3.28988561019803	0	2.6114142216782	2.15027894264002	0	2.47397757925581	1.53108459818759	0	0	1.75048145574537	2.63933594582324	0	0	0	1.90035706071708	0	0	2.69544810697013	0	0	0	0	0	1.69641216920991	0	1.9607996208036	2.2850446887007	0	0	2.97312237002494	0	1.83159513585076	2.22471274565542	0	2.2058037184276
Ehbp1	2.91206071148866	2.51449854005196	1.88361594048484	1.98181008988843	0	2.12650693025845	1.86863594734354	1.57120184588599	2.44271233217692	2.61316976459608	0	2.34549268838946	2.29141179239592	0	0	1.38054700437752	1.9891267505551	1.56728726629958	0	3.12408724813577	2.47397757925581	0	0	1.75048145574537	2.63933594582324	0	2.70516164150896	2.30510898111946	1.90035706071708	0	0	0	0	0	0	0	1.91353563432951	2.93478048241059	2.16039887906589	1.9607996208036	0	2.58266956932763	1.86770977587311	0	2.11680980684066	2.81729409483669	0	2.89021436433324	2.2058037184276
Wwc1	1.07593735315205	1.34549899220371	1.88361594048484	0	0	0	1.86863594734354	0	2.81877445741025	2.99389746869899	0	1.74383018970019	0	0	0	0	1.9891267505551	3.31619805005729	0	2.47397757925581	1.53108459818759	0	0	1.75048145574537	2.63933594582324	2.25088926712533	0	0	3.38240221030677	0	0	0	0	1.9697705634872	2.14893933617676	0	0	0	0	3.45078185013063	1.68881504459798	0	0	0	0	1.83159513585076	2.22471274565542	2.512152484619	0
Adam19	0	1.34549899220371	0	0	0	1.54602136135724	1.31901235403657	0	0	0	0	0	0	0	0	0	0	0	0	0	0	0	0	0	0	0	0	0	0	1.61103983508343	0	2.06763174829063	0	1.9697705634872	0	0	0	0	0	0	1.68881504459798	1.96237499240504	0	0	0	1.83159513585076	0	0	0
Arhgap44	0	0	0	0	0	0	0	0	0	0	0	0	0	0	0	0	0	1.56728726629958	0	0	0	0	0	0	0	2.25088926712533	0	0	0	0	0	0	0	0	0	0	0	0	0	0	0	1.96237499240504	0	0	0	0	0	0	0
Chd3	1.07593735315205	0	0	0	0	0	0	0	0	0	0	0	0	0	0	0	0	0	0	0	0	0	0	0	0	0	0	0	0	0	1.98532411759619	0	0	0	0	0	0	0	0	0	1.68881504459798	0	0	0	0	0	0	0	0
Nlk	1.91666108955033	0	1.55141957711566	0	0	0	1.31901235403657	2.78807531279701	1.83291754172156	1.99076229945814	2.12520704909252	1.74383018970019	0	0	0	1.38054700437752	0	0	0	0	0	2.02508882896837	1.88172665405828	0	2.01516306475125	0	2.0767337617138	0	2.89396786284092	1.61103983508343	0	0	1.91996529756053	0	0	0	1.91353563432951	2.29341174306379	0	0	2.2850446887007	0	1.31821006104027	2.32985368712411	2.11680980684066	1.83159513585076	2.22471274565542	1.89697833179407	2.2058037184276
Car4	0	0	0	0	0	2.12650693025845	0	0	1.83291754172156	0	0	0	0	0	0	0	0	2.15027894264002	0	0	0	0	1.88172665405828	0	0	0	0	0	0	0	0	0	0	0	0	0	0	0	0	0	0	0	0	0	0	0	0	0	0
Sept4	1.07593735315205	0	1.05050045916668	0	0	0	0	0	0	0	0	0	0	0	2.26314385595782	0	0	0	0	0	0	0	0	0	0	0	0	0	0	0	0	0	0	0	0	0	0	0	0	1.9607996208036	0	0	0	0	0	0	0	0	0
Cuedc1	0	0	0	0	0	0	0	0	0	0	0	1.74383018970019	0	0	0	1.38054700437752	0	1.56728726629958	0	0	0	0	0	0	0	0	0	0	1.90035706071708	0	0	0	0	0	0	0	0	0	0	0	0	0	0	0	0	0	0	0	0
Atp6v0a1	0	1.34549899220371	0	0	2.07368788619427	1.54602136135724	0	0	0	0	0	0	0	1.67598354048649	0	0	0	0	0	0	0	0	0	0	0	0	2.0767337617138	0	0	0	0	0	1.91996529756053	0	0	0	0	0	0	1.9607996208036	0	0	0	0	0	0	0	0	0
Nsf	1.91666108955033	1.34549899220371	1.55141957711566	2.34024664031611	0	1.54602136135724	2.48147611469121	1.57120184588599	0	0	0	1.74383018970019	0	0	0	1.93933903819439	1.9891267505551	0	1.82764235530237	0	0	1.45591183197954	0	2.72602906103627	0	0	0	0	0	2.56679750214283	0	0	0	0	0	0	0	2.66465747126812	0	0	0	0	0	0	1.53736192508292	1.83159513585076	0	0	0
Helz	2.36684574406429	1.89914859896049	2.49769862269068	0	2.07368788619427	0	2.68775430148231	1.57120184588599	2.44271233217692	2.61316976459608	2.12520704909252	1.74383018970019	2.93267413758685	2.27089805024348	2.26314385595782	0	2.99209791702142	1.56728726629958	0	2.47397757925581	2.74037240642779	1.45591183197954	2.49565373784495	2.35277882971183	2.63933594582324	0	0	2.94709552721833	0	1.61103983508343	0	0	0	2.59062182185687	0	1.65820783880945	0	2.29341174306379	3.17904464145577	0	2.2850446887007	2.96262129824963	1.86770977587311	0	1.53736192508292	0	0	2.512152484619	2.2058037184276
Carmil1	0	2.51449854005196	2.49769862269068	0	0	0	1.31901235403657	2.15464838700388	2.81877445741025	2.61316976459608	0	2.71850347605744	0	1.67598354048649	2.26314385595782	1.93933903819439	0	2.15027894264002	0	2.47397757925581	2.10977392952907	1.45591183197954	0	0	0	2.25088926712533	2.0767337617138	0	1.90035706071708	0	2.60733178829351	3.74800799473286	0	0	2.14893933617676	2.62101564260524	1.91353563432951	0	0	0	2.92596681773415	1.96237499240504	2.22030946179844	2.97312237002494	1.53736192508292	1.83159513585076	2.22471274565542	0	2.2058037184276
Slc22a23	0	0	0	0	0	0	0	0	0	0	0	0	0	0	0	0	0	0	1.82764235530237	0	1.53108459818759	0	0	0	0	2.25088926712533	0	0	1.90035706071708	0	2.60733178829351	0	0	0	0	0	0	0	0	0	0	0	0	0	0	0	0	0	0
Kif13a	1.07593735315205	0	0	1.98181008988843	2.07368788619427	1.54602136135724	2.48147611469121	0	0	1.99076229945814	0	0	0	0	0	0	2.6114142216782	1.56728726629958	0	2.47397757925581	0	0	0	1.75048145574537	2.01516306475125	2.88994685880331	0	0	1.90035706071708	0	1.98532411759619	0	0	1.9697705634872	2.14893933617676	1.65820783880945	1.91353563432951	1.69641216920991	0	0	0	2.58266956932763	0	0	1.53736192508292	2.44127489383508	0	0	0
2010111I01Rik	0	1.34549899220371	0	0	2.07368788619427	2.12650693025845	2.48147611469121	1.57120184588599	0	0	0	0	0	0	0	0	0	0	1.82764235530237	0	0	0	0	0	2.01516306475125	2.25088926712533	0	0	1.90035706071708	1.61103983508343	0	0	0	0	0	0	0	0	0	0	2.2850446887007	1.96237499240504	1.86770977587311	0	0	0	0	0	0
Iqgap2	1.07593735315205	1.34549899220371	2.13254695967852	1.98181008988843	0	2.12650693025845	1.86863594734354	0	0	0	0	0	0	0	0	0	0	0	0	0	1.53108459818759	0	0	0	2.01516306475125	0	0	0	0	1.61103983508343	0	0	0	0	0	2.89034814709658	0	0	0	0	0	0	0	0	0	0	2.22471274565542	0	2.2058037184276
Arl15	1.91666108955033	2.25342706793153	2.64002623834155	3.25899841940706	2.43634246842745	3.4191059774885	2.48147611469121	2.15464838700388	2.81877445741025	2.61316976459608	3.14086644680827	2.71850347605744	2.29141179239592	0	2.26314385595782	2.29568429039192	0	0	0	0	2.74037240642779	0	2.49565373784495	0	2.01516306475125	0	2.0767337617138	0	3.1677142504442	2.19900433308965	1.98532411759619	0	3.18977186678287	2.59062182185687	0	0	0	2.29341174306379	2.16039887906589	1.9607996208036	2.2850446887007	1.96237499240504	2.22030946179844	2.97312237002494	0	0	2.86229517162776	0	0
Daam1	2.36684574406429	2.25342706793153	1.05050045916668	0	0	1.54602136135724	0	2.52069886019704	2.44271233217692	2.61316976459608	0	1.74383018970019	2.29141179239592	1.67598354048649	0	0	1.9891267505551	2.78343635018663	1.82764235530237	2.47397757925581	1.53108459818759	2.02508882896837	1.88172665405828	0	0	0	0	0	0	0	0	2.06763174829063	1.91996529756053	0	2.14893933617676	1.65820783880945	0	1.69641216920991	2.16039887906589	2.96088294434551	2.2850446887007	0	1.31821006104027	3.36139270087774	0	1.83159513585076	2.22471274565542	1.89697833179407	0
Dpf3	2.36684574406429	1.89914859896049	2.33169797722837	1.41777666095699	2.43634246842745	2.4914093412497	1.86863594734354	1.57120184588599	1.83291754172156	0	3.63424258521063	1.74383018970019	3.32022831912849	0	3.78569582032458	0	1.9891267505551	2.78343635018663	1.82764235530237	0	0	1.45591183197954	1.88172665405828	0	2.01516306475125	0	0	0	2.51580470673591	2.56679750214283	1.98532411759619	0	3.18977186678287	2.59062182185687	0	0	2.53004053634353	0	2.16039887906589	0	1.68881504459798	1.96237499240504	1.86770977587311	0	0	0	2.22471274565542	0	2.84229485571925
Abcd4	1.07593735315205	0	0	0	0	0	0	0	0	0	0	0	0	0	0	0	0	0	0	0	0	0	0	0	0	0	0	0	0	0	0	0	0	0	0	0	0	0	0	0	0	0	0	0	0	0	0	0	0
Ttll5	1.07593735315205	1.89914859896049	2.33169797722837	2.60355817831654	2.07368788619427	1.54602136135724	2.22128588849634	2.52069886019704	1.83291754172156	0	2.12520704909252	0	0	1.67598354048649	0	0	0	2.78343635018663	0	0	0	0	0	2.72602906103627	2.01516306475125	0	0	0	0	0	1.98532411759619	0	0	2.97077821408116	0	1.65820783880945	1.91353563432951	2.29341174306379	0	1.9607996208036	2.92596681773415	0	2.68673356565757	2.97312237002494	0	1.83159513585076	2.86229517162776	1.89697833179407	0
Foxn3	0	0	1.05050045916668	0	2.43634246842745	0	0	2.78807531279701	1.83291754172156	0	2.12520704909252	1.74383018970019	0	1.67598354048649	0	0	0	2.15027894264002	0	0	2.10977392952907	0	3.14670595881875	0	0	2.25088926712533	0	2.30510898111946	3.1677142504442	2.83509769274711	0	2.06763174829063	0	0	2.14893933617676	0	0	0	0	1.9607996208036	2.2850446887007	0	0	2.32985368712411	0	0	0	0	2.2058037184276
Itpk1	1.07593735315205	1.34549899220371	1.05050045916668	0	0	0	0	0	0	1.99076229945814	0	0	0	1.67598354048649	0	1.38054700437752	0	0	0	0	0	0	0	0	0	0	0	2.30510898111946	0	1.61103983508343	0	0	0	0	0	0	0	1.69641216920991	2.16039887906589	0	0	0	0	0	0	0	2.22471274565542	0	0
Dync1h1	1.07593735315205	1.34549899220371	1.05050045916668	0	2.07368788619427	1.54602136135724	1.31901235403657	0	1.83291754172156	0	0	0	0	1.67598354048649	2.90287816213688	0	0	2.51615335692629	0	0	0	1.45591183197954	1.88172665405828	1.75048145574537	2.01516306475125	2.25088926712533	0	0	0	0	1.98532411759619	0	0	1.9697705634872	0	1.65820783880945	0	1.69641216920991	0	0	1.68881504459798	0	0	0	0	1.83159513585076	0	0	2.2058037184276
Exoc3l4	0	0	0	0	2.07368788619427	1.54602136135724	0	0	0	1.99076229945814	0	0	0	1.67598354048649	2.26314385595782	0	0	0	0	0	0	0	0	1.75048145574537	0	0	0	0	1.90035706071708	0	0	0	1.91996529756053	0	0	0	1.91353563432951	1.69641216920991	0	0	0	0	0	0	0	1.83159513585076	0	0	2.2058037184276
Ank	0	1.34549899220371	1.05050045916668	1.41777666095699	0	0	0	2.15464838700388	0	0	0	0	0	3.1232563009578	0	2.29568429039192	0	0	0	0	1.53108459818759	0	0	0	0	0	2.0767337617138	0	0	0	0	0	0	1.9697705634872	0	0	0	0	0	0	0	0	0	0	0	0	0	0	0
Ext1	2.1668756163322	0	2.49769862269068	2.34024664031611	1.49896467357776	2.12650693025845	2.22128588849634	1.57120184588599	0	0	2.12520704909252	1.74383018970019	3.59883317342915	1.67598354048649	0	3.42656505443473	0	2.99413767964763	2.4369772841275	0	3.27193567392086	0	2.49565373784495	2.35277882971183	0	2.25088926712533	3.08808814761517	2.30510898111946	1.90035706071708	0	2.98791283656216	2.69544810697013	2.53698058623264	2.59062182185687	2.78201386269936	0	1.91353563432951	0	2.16039887906589	2.96088294434551	1.68881504459798	0	1.86770977587311	0	1.53736192508292	1.83159513585076	0	0	0
Pvt1	2.1668756163322	1.34549899220371	2.13254695967852	0	0	0	1.86863594734354	1.57120184588599	0	2.61316976459608	0	3.87519452063808	0	0	0	2.76539935017192	0	0	1.82764235530237	0	2.95052264812006	2.38556280584336	0	0	0	0	0	0	0	1.61103983508343	1.98532411759619	0	0	2.59062182185687	2.14893933617676	0	0	0	2.16039887906589	1.9607996208036	0	0	1.31821006104027	0	2.74786072735801	2.44127489383508	2.86229517162776	2.512152484619	2.2058037184276
Slc38a1	2.36684574406429	1.89914859896049	2.49769862269068	1.98181008988843	1.49896467357776	0	1.86863594734354	1.57120184588599	0	1.99076229945814	0	1.74383018970019	2.29141179239592	2.64135083751663	0	1.38054700437752	2.6114142216782	0	1.82764235530237	0	0	2.02508882896837	1.88172665405828	0	0	0	0	0	1.90035706071708	2.83509769274711	2.60733178829351	2.06763174829063	3.18977186678287	3.24556160483345	3.66044880314916	2.25126943049447	0	2.29341174306379	2.16039887906589	0	1.68881504459798	2.58266956932763	2.48047245816107	0	0	0	3.5264575884357	0	0
Lima1	0	2.25342706793153	1.05050045916668	1.41777666095699	0	0	1.86863594734354	0	0	1.99076229945814	0	0	0	2.27089805024348	2.26314385595782	2.29568429039192	1.9891267505551	0	0	2.47397757925581	2.10977392952907	2.38556280584336	0	1.75048145574537	2.63933594582324	2.25088926712533	0	0	0	1.61103983508343	0	0	0	0	0	0	1.91353563432951	2.66465747126812	0	0	0	1.96237499240504	1.86770977587311	0	1.53736192508292	0	0	1.89697833179407	0
Fgd4	0	2.25342706793153	1.05050045916668	1.98181008988843	0	2.12650693025845	0	0	0	0	0	0	0	2.27089805024348	0	1.38054700437752	0	1.56728726629958	0	0	0	1.45591183197954	2.87325333791181	0	2.01516306475125	0	0	0	2.51580470673591	0	0	0	1.91996529756053	1.9697705634872	0	0	1.91353563432951	0	0	0	1.68881504459798	1.96237499240504	0	0	2.11680980684066	0	2.22471274565542	1.89697833179407	0
Eif4g1	0	0	1.88361594048484	2.34024664031611	1.49896467357776	2.4914093412497	1.86863594734354	2.15464838700388	1.83291754172156	2.61316976459608	0	1.74383018970019	0	0	0	1.38054700437752	2.6114142216782	2.51615335692629	1.82764235530237	0	0	2.38556280584336	3.14670595881875	0	0	2.25088926712533	2.0767337617138	0	2.51580470673591	1.61103983508343	0	2.06763174829063	0	0	0	2.25126943049447	1.91353563432951	1.69641216920991	2.79417860972536	0	1.68881504459798	0	0	2.97312237002494	2.11680980684066	2.44127489383508	0	1.89697833179407	0
Lpp	3.01197003770463	0	2.33169797722837	3.25899841940706	3.36094507493944	2.4914093412497	3.13191425983843	2.52069886019704	1.83291754172156	3.26897751197573	2.12520704909252	1.74383018970019	3.32022831912849	2.64135083751663	0	3.51891646325958	2.99209791702142	2.99413767964763	1.82764235530237	0	3.79500055002248	3.17883451862591	3.53773621179462	4.46167769719488	0	2.25088926712533	2.70516164150896	0	0	2.19900433308965	1.98532411759619	3.07815209415603	2.53698058623264	0	2.78201386269936	0	0	2.93478048241059	3.17904464145577	4.81299802506743	1.68881504459798	1.96237499240504	1.86770977587311	2.97312237002494	2.74786072735801	3.08992155079524	0	1.89697833179407	4.05252920964931
Tfrc	0	0	1.05050045916668	0	0	2.12650693025845	1.31901235403657	0	1.83291754172156	0	0	1.74383018970019	2.29141179239592	0	0	0	0	2.15027894264002	1.82764235530237	0	0	0	1.88172665405828	0	2.01516306475125	0	0	0	0	1.61103983508343	0	0	0	0	0	0	0	0	0	0	0	0	0	0	0	0	0	0	2.2058037184276
Mylk	1.07593735315205	0	0	0	0	0	1.31901235403657	0	0	1.99076229945814	0	0	0	0	0	0	1.9891267505551	0	0	0	0	0	0	0	0	0	0	0	0	0	0	0	0	0	0	0	0	0	0	0	0	0	0	0	0	0	0	0	0
Bbx	2.80105013918008	2.51449854005196	1.88361594048484	1.98181008988843	2.07368788619427	2.96855689163298	2.85867215740902	2.78807531279701	1.83291754172156	0	0	1.74383018970019	2.29141179239592	2.64135083751663	2.90287816213688	2.29568429039192	0	2.78343635018663	1.82764235530237	3.79500055002248	2.95052264812006	1.45591183197954	3.14670595881875	2.35277882971183	3.29612579984049	2.25088926712533	0	2.30510898111946	2.51580470673591	2.83509769274711	0	3.74800799473286	2.91572351951435	2.59062182185687	2.78201386269936	2.62101564260524	0	1.69641216920991	0	3.6278025780313	3.90285489283434	3.23729835533857	0	2.32985368712411	2.48130875585591	2.81729409483669	0	1.89697833179407	2.84229485571925
Hlcs	1.07593735315205	0	1.88361594048484	1.41777666095699	0	1.54602136135724	0	0	0	1.99076229945814	0	1.74383018970019	0	0	0	0	0	0	0	0	1.53108459818759	0	0	0	2.01516306475125	0	0	0	0	0	0	0	0	0	0	0	0	0	0	0	0	0	1.31821006104027	0	0	0	0	1.89697833179407	0
C2cd2	0	0	0	0	1.49896467357776	1.54602136135724	0	0	0	0	0	0	2.29141179239592	0	0	0	0	0	0	0	0	0	1.88172665405828	0	0	0	0	0	0	0	0	0	0	0	0	0	0	0	0	0	1.68881504459798	0	0	0	2.11680980684066	0	0	1.89697833179407	0
Arid1b	2.1668756163322	1.34549899220371	2.87535594514573	1.98181008988843	2.43634246842745	2.12650693025845	0	2.15464838700388	2.44271233217692	2.61316976459608	0	0	0	0	2.26314385595782	2.29568429039192	0	2.15027894264002	2.4369772841275	0	2.47397757925581	3.17883451862591	1.88172665405828	3.38588892208523	2.01516306475125	2.25088926712533	0	0	2.89396786284092	2.56679750214283	2.98791283656216	2.06763174829063	0	1.9697705634872	2.78201386269936	2.25126943049447	0	1.69641216920991	0	0	1.68881504459798	0	1.31821006104027	2.32985368712411	0	1.83159513585076	2.22471274565542	0	0
Zdhhc14	0	1.34549899220371	0	0	0	1.54602136135724	0	0	0	1.99076229945814	0	1.74383018970019	2.29141179239592	0	2.26314385595782	2.29568429039192	0	0	0	0	1.53108459818759	0	0	0	0	0	0	0	0	0	0	0	0	0	0	0	0	0	0	0	0	1.96237499240504	0	0	0	0	0	0	0
Tulp4	0	1.34549899220371	1.88361594048484	0	0	0	2.22128588849634	2.15464838700388	0	0	0	0	2.93267413758685	0	0	1.38054700437752	0	2.78343635018663	1.82764235530237	0	1.53108459818759	0	1.88172665405828	0	0	0	0	0	1.90035706071708	0	0	0	0	0	0	0	0	0	0	0	0	0	1.31821006104027	2.97312237002494	0	0	2.22471274565542	0	0
Caskin1	0	0	1.05050045916668	0	0	1.54602136135724	1.86863594734354	2.15464838700388	1.83291754172156	0	0	1.74383018970019	2.29141179239592	0	0	1.38054700437752	1.9891267505551	2.51615335692629	0	0	0	2.02508882896837	3.14670595881875	0	2.63933594582324	2.25088926712533	0	0	0	0	0	0	0	1.9697705634872	0	0	0	2.29341174306379	2.16039887906589	0	1.68881504459798	1.96237499240504	1.31821006104027	0	2.11680980684066	0	0	0	0
Zfand3	2.67615934272763	2.51449854005196	2.64002623834155	1.41777666095699	2.43634246842745	0	2.22128588849634	2.52069886019704	2.81877445741025	1.99076229945814	0	1.74383018970019	2.29141179239592	2.91105605595869	2.26314385595782	2.76539935017192	3.6598339270642	2.51615335692629	1.82764235530237	3.12408724813577	3.71003098651685	2.02508882896837	0	0	2.63933594582324	2.25088926712533	2.70516164150896	2.30510898111946	3.38240221030677	1.61103983508343	1.98532411759619	0	2.91572351951435	2.59062182185687	2.14893933617676	3.27712067670045	2.53004053634353	2.66465747126812	2.79417860972536	2.96088294434551	2.2850446887007	0	1.86770977587311	2.97312237002494	3.27963621712624	2.81729409483669	2.22471274565542	0	3.72298426999812
Ankrd12	0	0	0	1.41777666095699	2.70191178897047	2.12650693025845	1.86863594734354	0	1.83291754172156	0	0	0	0	1.67598354048649	0	1.38054700437752	0	2.51615335692629	0	0	0	1.45591183197954	1.88172665405828	1.75048145574537	0	0	0	0	0	0	0	0	1.91996529756053	0	0	2.25126943049447	0	1.69641216920991	0	0	1.68881504459798	0	1.31821006104027	0	0	0	0	0	0
Prkce	3.10279794458069	2.72132906007639	2.33169797722837	2.81178913370242	2.91154910985835	4.03231724611003	2.22128588849634	2.78807531279701	4.8023665565577	2.99389746869899	3.41767832420624	1.74383018970019	2.93267413758685	0	0	0	3.4826465252231	4.29153978114502	2.4369772841275	0	2.10977392952907	2.02508882896837	3.14670595881875	3.53519251070246	4.18995024157055	3.55491101976925	0	2.30510898111946	4.74289216013685	2.19900433308965	0	0	1.91996529756053	1.9697705634872	4.12076025216187	0	0	3.32237268963953	0	0	3.59194173699676	2.58266956932763	1.86770977587311	3.64036522589665	1.53736192508292	0	0	1.89697833179407	2.2058037184276
Mpp7	1.07593735315205	0	1.05050045916668	0	1.49896467357776	2.75817590126603	0	2.15464838700388	2.81877445741025	0	0	1.74383018970019	0	1.67598354048649	0	1.38054700437752	0	1.56728726629958	2.4369772841275	0	0	1.45591183197954	0	0	0	0	0	0	1.90035706071708	0	0	0	0	0	0	1.65820783880945	0	0	0	1.9607996208036	1.68881504459798	2.58266956932763	1.31821006104027	0	2.11680980684066	0	0	0	0
Mapre2	0	1.34549899220371	0	1.41777666095699	1.49896467357776	1.54602136135724	0	0	0	0	2.12520704909252	0	0	0	0	1.38054700437752	1.9891267505551	0	0	0	0	0	0	0	0	0	0	0	0	0	0	0	1.91996529756053	0	0	0	0	0	0	0	0	1.96237499240504	0	0	0	0	0	0	0
Lims2	0	0	0	0	0	0	1.31901235403657	0	0	0	0	0	0	0	0	0	0	0	0	0	0	0	0	0	0	2.25088926712533	0	0	0	0	0	0	0	0	0	0	0	0	0	0	0	0	0	0	0	0	0	0	0
Epb41l4a	0	0	0	0	0	0	1.31901235403657	0	0	0	2.12520704909252	0	0	0	0	0	0	0	0	0	0	0	0	0	2.01516306475125	0	0	0	0	0	0	0	0	0	0	0	0	0	0	0	0	0	0	0	0	0	0	0	0
Ctnna1	2.1668756163322	0	1.55141957711566	1.98181008988843	2.07368788619427	1.54602136135724	1.31901235403657	0	1.83291754172156	1.99076229945814	2.12520704909252	2.34549268838946	2.29141179239592	0	0	0	0	2.51615335692629	0	0	2.10977392952907	1.45591183197954	2.49565373784495	3.38588892208523	0	0	0	0	2.51580470673591	1.61103983508343	2.98791283656216	0	0	1.9697705634872	2.78201386269936	1.65820783880945	3.39735793877698	1.69641216920991	2.16039887906589	0	0	1.96237499240504	0	2.32985368712411	2.74786072735801	0	0	1.89697833179407	0
Arhgap26	0	0	0	0	0	0	2.68775430148231	0	2.44271233217692	0	0	0	0	0	0	0	3.26715511799141	2.78343635018663	0	0	0	0	0	0	2.01516306475125	0	0	0	1.90035706071708	0	0	0	0	0	0	0	0	0	0	0	0	0	0	0	0	0	2.22471274565542	0	0
Sema6a	0	1.89914859896049	0	0	0	1.54602136135724	1.31901235403657	0	1.83291754172156	0	0	0	0	0	0	0	0	0	0	0	0	0	1.88172665405828	0	0	0	0	0	0	0	0	0	0	0	0	0	0	0	0	0	0	0	0	0	0	0	0	0	2.2058037184276
Zbtb7c	0	1.34549899220371	0	1.98181008988843	1.49896467357776	1.54602136135724	0	0	0	0	2.12520704909252	0	0	0	0	0	0	2.78343635018663	0	0	2.10977392952907	2.38556280584336	0	0	0	0	0	0	1.90035706071708	1.61103983508343	0	0	0	0	0	1.65820783880945	0	1.69641216920991	0	0	0	1.96237499240504	1.86770977587311	0	0	0	0	0	0
Malat1	4.45481913321339	4.48912130330255	4.72335222488516	4.73273251670343	4.86484548483641	4.89738774779183	4.27989529838208	5.03368193935286	5.65113192761134	5.56131840187974	4.89592276085778	4.5579123535694	6.26424446530766	3.69128749944673	5.81983753722367	4.56711985049192	4.94022185572216	4.63887495553156	4.37308805696155	5.94393988619923	4.73020544352725	4.38104374469282	4.72114363380342	5.06255287819225	5.01426113584046	5.83143389815038	4.15583631477931	6.15340072561194	4.83740989793886	4.53457999021634	4.84125476544797	4.3433748204404	5.02610676465573	3.91904333904811	6.17018112893244	3.27712067670045	3.97016110482699	4.63908732774269	4.9355003666406	4.76213219029498	4.92583922607989	5.6212315271375	4.98392523092558	6.1416543051026	4.56392961105814	4.55796424084815	5.85086438223535	4.45418258145681	5.87608723814788
Neat1	1.07593735315205	2.51449854005196	1.55141957711566	1.98181008988843	2.43634246842745	2.75817590126603	2.22128588849634	1.57120184588599	2.44271233217692	2.61316976459608	2.12520704909252	0	0	2.27089805024348	2.26314385595782	1.93933903819439	3.4826465252231	2.15027894264002	1.82764235530237	0	0	0	0	2.72602906103627	2.01516306475125	2.25088926712533	0	0	1.90035706071708	2.56679750214283	0	0	1.91996529756053	0	2.14893933617676	0	1.91353563432951	2.29341174306379	0	3.2355372264227	0	2.96262129824963	2.22030946179844	2.97312237002494	0	0	0	0	2.2058037184276
Ahnak	0	0	0	0	3.08476409300719	1.54602136135724	0	0	1.83291754172156	1.99076229945814	0	0	2.29141179239592	1.67598354048649	0	0	1.9891267505551	2.51615335692629	0	0	0	0	2.49565373784495	2.72602906103627	3.51183652857604	0	0	0	0	1.61103983508343	0	0	0	1.9697705634872	0	0	0	1.69641216920991	0	1.9607996208036	2.2850446887007	0	0	2.32985368712411	0	0	0	0	2.2058037184276
Trpm6	1.07593735315205	0	0	0	0	0	0	0	0	0	0	0	0	0	0	0	0	0	0	0	0	0	0	0	0	0	0	0	1.90035706071708	0	0	0	0	0	0	0	0	0	0	0	1.68881504459798	0	0	0	0	0	0	0	2.2058037184276
Kank1	2.1668756163322	1.34549899220371	0	1.41777666095699	1.49896467357776	1.54602136135724	1.86863594734354	0	0	0	0	0	2.29141179239592	0	0	0	2.6114142216782	0	0	0	0	0	0	1.75048145574537	0	2.88994685880331	2.0767337617138	0	0	0	1.98532411759619	0	0	0	0	0	0	0	0	0	0	0	0	0	0	0	0	0	0
Myof	1.58216563210548	1.34549899220371	1.55141957711566	2.34024664031611	1.49896467357776	0	0	0	0	1.99076229945814	0	0	0	0	0	0	2.6114142216782	0	0	0	0	0	0	0	0	2.88994685880331	2.0767337617138	0	0	0	0	0	0	0	0	1.65820783880945	0	0	0	0	0	0	0	0	0	0	0	0	0
Pdlim1	1.58216563210548	0	1.05050045916668	1.41777666095699	2.43634246842745	1.54602136135724	2.48147611469121	2.15464838700388	1.83291754172156	0	0	0	0	0	0	0	0	0	0	0	0	1.45591183197954	2.87325333791181	2.35277882971183	2.63933594582324	0	0	0	1.90035706071708	0	0	2.06763174829063	0	0	0	0	0	0	0	1.9607996208036	1.68881504459798	0	0	0	0	0	2.22471274565542	0	0
Rbm20	0	0	0	0	0	0	0	0	0	0	0	0	0	0	0	2.29568429039192	0	0	0	0	0	0	1.88172665405828	0	0	0	0	0	0	0	0	0	0	0	0	0	0	0	0	0	0	0	0	0	0	0	0	0	0
Atrnl1	1.58216563210548	0	1.88361594048484	1.98181008988843	1.49896467357776	0	1.86863594734354	0	1.83291754172156	0	2.12520704909252	0	2.29141179239592	0	0	1.38054700437752	1.9891267505551	1.56728726629958	1.82764235530237	0	1.53108459818759	0	0	0	0	0	2.0767337617138	0	0	2.56679750214283	0	0	0	0	0	1.65820783880945	0	1.69641216920991	0	0	0	0	1.31821006104027	0	2.11680980684066	0	0	0	0
[truncated: 4,660 more columns]
