# Supplementary material for: Single nuclei RNA-seq of mouse placental labyrinth development
Source: eLife. 2020 Nov 3;9:e60266. doi: 10.7554/eLife.60266 (PMC7669270; doi:10.7554/eLife.60266)
Supplement: Figure 2—source data 4. [file elife-60266-fig2-data4.csv]

	TTGCGTCAGCTCAGAG_1	ATTCCCGTCTATCACT_2	GTCAGCGAGGACTATA_3	GTAGGAGAGACCCTTA_4	GTTATGGTCATTCCTA_4	TCACGGGCACAACGCC_4	TGGGAGATCTCCAAGA_4	TAAGCCACACTTCCTG_1	TTCCGGTAGTCACGCC_1	TCTGCCATCCAACTAG_1	ATTGGGTCAAACGAGC_2	AAGTTCGGTACATACC_2	ACAACCACAAGAATAC_2	CCTCTCCGTAGCGTCC_3	AGAACCTGTCCCGTGA_3	AGAAATGGTTTGAACC_1	ATATCCTTCTATTCGT_1	CTATAGGGTGCCTTCT_2	TGCTGAAGTACTCCCT_2	TTGCCTGAGCAGCCCT_2	ACATGCAAGACTAAGT_1	GCCGTGATCCTCTCTT_1	GCACATATCCCATGGG_1	TGATTCTTCGTCCTTG_1	GACTGATTCGGCGATC_3	CACGTTCGTAGGTGCA_1	CCAATTTAGCATTGAA_3	CTCCTCCTCAACGTGT_1	CAAGCTAGTCTTACAG_1	TCCTAATTCCGGTAGC_1	GCCAGCAGTTACTCAG_1	CACGTTCCACTCAAGT_2	GCAGCCAGTACACGTT_1	TCGATTTCAATGTCAC_1	TACCCGTGTATGCAAA_1	TGTAAGCAGTAGAATC_1	ACTTTCAGTCTCAGGC_1	AGGATAATCAAGCCGC_1	GATCATGAGGCCATAG_1	GGTTGTATCAGCTCTC_1	TCCGAAAAGACTAGAT_1	TTGAACGTCTTTCAGT_1	GAGACCCAGCGCCCAT_2	GAGGCAACACGGATCC_2	TCCTTTCGTTCTCAGA_2	GAGATGGAGAGGCGGA_3	CATTTCAAGTAGCAAT_2	AATCGACCAAATGGCG_3	GGGACCTCATGTGTCA_2
Ncoa2	0	2.18103416648712	0	1.85623049348733	1.80848109200444	2.46580536550488	2.74399514267271	0	0	1.38188561121774	0	1.1774793798721	1.5951915298159	2.40153959170054	0	1.88219852107302	1.60529084532146	1.56220326605152	2.23545448879638	0	1.29696043990145	1.96053737886324	1.53707526384671	0	1.77284598709209	1.72424673944707	1.48165090626768	1.15645633846224	2.21848185153062	1.60402000419271	0	1.33302966610564	1.47824443665154	0	2.51632773563111	0	2.04504095614654	2.37961268000602	0	1.9189724933235	2.16893192398403	2.69647908846502	0	2.46941119446707	1.40930321104762	2.48634398088149	2.06763174829063	0	1.52038403247398
Dst	1.91304334097496	3.47883221357539	0	2.84483403817121	3.84824279784309	3.62056687520306	3.90190408616494	0	0	2.29729225585432	0	3.05473833553502	2.54849309702186	0	1.94471110814427	1.88219852107302	1.60529084532146	1.56220326605152	1.64390993462428	0	1.84313693515726	2.78857634862389	1.53707526384671	3.05666665395977	1.77284598709209	0	1.48165090626768	1.15645633846224	1.62858967852153	2.19120286332434	2.18138266187056	2.23831833982043	1.47824443665154	1.53879714164537	1.90084099868064	0	1.17654765961443	2.85270053515749	1.39864534214568	0	1.58401081863252	2.49005561298419	2.60095532030742	2.46941119446707	1.40930321104762	1.54167716546894	2.43002059530923	2.07917908596773	2.0977679365713
Myo1b	0	0	2.66881159069705	2.46802631430948	0	1.61737829430071	1.76638362943403	2.59864824950816	0	0	2.08532623654161	1.70335857875318	2.18138266187056	0	0	0	1.60529084532146	2.51024565995989	1.3306698310669	0	1.29696043990145	1.39910484519709	0	0	0	1.72424673944707	0	0	0	1.60402000419271	1.5951915298159	0	0	0	0	0	2.04504095614654	0	1.39864534214568	0	0	1.32587712930109	1.41564721758502	1.67263712047957	1.40930321104762	1.54167716546894	1.4935867112408	2.07917908596773	0
Fn1	0	0	2.66881159069705	1.85623049348733	3.69160062508928	2.34433528574587	3.40445749978341	1.41376060629237	0	0	2.08532623654161	0	0	3.04833996478759	1.94471110814427	0	0	0	0	1.45088903063211	0	0	0	0	1.77284598709209	0	0	0	1.62858967852153	1.60402000419271	0	0	0	0	0	0	0	0	1.39864534214568	0	0	0	0	0	0	0	1.4935867112408	2.07917908596773	0
Mgat5	0	0	0	1.85623049348733	0.993396610650691	3.22839674508752	0	1.97723927763111	0	0	2.08532623654161	2.50396614623693	1.5951915298159	0	1.94471110814427	1.88219852107302	1.60529084532146	1.56220326605152	1.3306698310669	2.01940121907183	1.29696043990145	1.96053737886324	0	0	1.77284598709209	0	1.48165090626768	2.64417957597193	2.58701526350184	0	2.18138266187056	1.33302966610564	1.47824443665154	2.74957154853009	0	2.50851588838906	1.17654765961443	0	1.39864534214568	0	1.58401081863252	2.22963370157271	1.41564721758502	2.01347435610029	0	1.54167716546894	1.4935867112408	2.70777024589321	1.52038403247398
Plekha6	0	0	0	0	2.6812358016196	1.85418324576903	2.74399514267271	0	1.55010236289611	1.38188561121774	0	0	1.5951915298159	0	0	0	2.56016275079556	0	0	0	0	0	0	0	2.37724451201169	0	0	0	0	0	0	0	0	0	0	0	0	0	0	0	0	0	0	1.15155178662365	0	0	0	2.70777024589321	2.0977679365713
1700025G04Rik	2.90804882529951	3.20137878589196	2.66881159069705	2.84483403817121	3.69160062508928	3.62056687520306	4.88235359590306	0	0	1.38188561121774	0	0	1.5951915298159	0	1.94471110814427	1.88219852107302	1.60529084532146	0	0.872041390770809	2.85270053515749	1.29696043990145	0	0	1.47615728415992	0	0	1.48165090626768	0	0	1.60402000419271	2.18138266187056	1.88479921201474	2.88626342805006	0	1.90084099868064	0	1.17654765961443	1.45088903063211	0	1.9189724933235	1.58401081863252	0	0	1.15155178662365	1.40930321104762	0	0	2.07917908596773	0
Rabgap1l	0	0	0	0	1.80848109200444	2.57410575972308	1.76638362943403	0	0	0	0	0	0	0	0	0	1.60529084532146	0	0	0	0	0	0	0	1.77284598709209	1.72424673944707	0	0	0	0	0	0	0	0	0	1.56071546606206	0	0	1.39864534214568	1.3627638637097	0	1.32587712930109	0	1.15155178662365	0	0	0	0	0
Fam78b	1.91304334097496	0	2.66881159069705	0	0.993396610650691	2.98833899921873	0	0	0	0	0	1.1774793798721	1.5951915298159	0	1.94471110814427	0	0	1.56220326605152	1.3306698310669	0	0	0	0	0	0	0	0	0	0	0	0	1.88479921201474	0	0	0	0	0	0	0	0	0	0	0	0	0	0	2.06763174829063	0	0
Nos1ap	0	0	0	0	2.05432427253536	2.34433528574587	2.37018028595242	0	0	0	2.08532623654161	0	0	2.40153959170054	0	0	0	0	0	0	0	0	0	0	0	0	0	0	0	0	0	0	0	0	0	0	0	0	0	0	0	0	0	0	0	0	0	0	0
Cdc42bpa	0	0	0	0	0.993396610650691	1.30650411282277	1.76638362943403	0	0	1.38188561121774	0	1.1774793798721	0	0	0	0	0	0	0	2.01940121907183	1.84313693515726	0	0	0	0	2.32401285607585	0	0	1.62858967852153	1.60402000419271	1.5951915298159	1.33302966610564	0	1.53879714164537	0	0	1.7022571258035	1.45088903063211	0	1.9189724933235	0	1.32587712930109	0	1.15155178662365	1.40930321104762	0	0	0	0
Fam171a1	0	0	0	0	0	2.46580536550488	0	0	0	0	0	1.1774793798721	0	0	0	0	0	0	0	0	0	0	0	0	0	0	0	0	0	0	0	0	0	0	0	0	0	0	0	0	0	0	0	0	0	0	0	0	0
Etl4	2.52950901854903	3.20137878589196	3.72009844000801	2.84483403817121	3.21106440538844	2.20604334445495	1.76638362943403	2.80680525230705	1.55010236289611	3.42829484579859	2.7143259804111	2.3010565219101	2.81643168929903	2.40153959170054	3.43263334384202	3.5382766675698	2.56016275079556	2.98803214185806	1.3306698310669	2.01940121907183	2.45381513002962	1.39910484519709	2.11648862170071	3.64118676312502	0	0	2.41596842294391	2.27362959456693	2.58701526350184	2.82683627979852	3.02753929531507	3.15017413051673	1.47824443665154	3.13348771802684	0	2.14293903016024	1.7022571258035	2.64387605511248	3.34805650427054	1.3627638637097	2.16893192398403	1.32587712930109	1.41564721758502	2.90716225226908	1.97216318304985	1.54167716546894	2.06763174829063	3.36700621975155	2.72758649628067
Brd3	1.91304334097496	0	2.66881159069705	0	0	1.61737829430071	1.76638362943403	0	0	1.9408699880354	0	1.1774793798721	0	0	0	0	0	1.56220326605152	0	0	0	0	0	0	0	0	1.48165090626768	1.15645633846224	0	0	1.5951915298159	0	0	0	0	0	1.17654765961443	0	0	1.3627638637097	0	1.32587712930109	0	1.67263712047957	0	0	1.4935867112408	0	1.52038403247398
Rapgef1	1.91304334097496	2.18103416648712	0	1.85623049348733	1.48178229328473	1.61737829430071	3.22875893044464	1.97723927763111	2.13107349438063	1.38188561121774	0	1.1774793798721	2.18138266187056	2.40153959170054	2.94311363974871	2.87377852583086	1.60529084532146	1.56220326605152	0	2.37961268000602	1.29696043990145	1.39910484519709	0	2.04797595982601	0	0	1.48165090626768	2.01968459887662	0	0	0	1.88479921201474	0	1.53879714164537	1.90084099868064	0	1.7022571258035	1.45088903063211	1.96001316875166	0	2.8032312236574	2.22963370157271	0	2.90716225226908	1.97216318304985	1.54167716546894	1.4935867112408	2.07917908596773	1.52038403247398
Fnbp1	0	2.18103416648712	0	0	0	2.04550980668694	1.76638362943403	0	0	0	0	0	0	0	0	0	0	0	0	1.45088903063211	0	1.96053737886324	1.53707526384671	0	1.77284598709209	0	0	0	0	1.60402000419271	1.5951915298159	0	2.05033202914929	0	0	0	1.17654765961443	0	0	0	0	0	0	0	0	0	2.69544810697013	0	2.0977679365713
Dennd1a	2.52950901854903	3.20137878589196	2.66881159069705	3.11787344929481	1.80848109200444	2.34433528574587	1.76638362943403	2.59864824950816	1.55010236289611	3.32653253910563	0	2.3010565219101	2.18138266187056	3.04833996478759	2.56365802305712	1.88219852107302	1.60529084532146	1.56220326605152	0.872041390770809	2.01940121907183	2.19438517880036	2.58069294633775	0	2.04797595982601	0	1.72424673944707	1.48165090626768	1.15645633846224	1.62858967852153	2.55869531334854	2.54849309702186	1.33302966610564	2.05033202914929	2.95984153858702	1.90084099868064	1.56071546606206	2.04504095614654	2.01940121907183	1.39864534214568	0	2.16893192398403	1.32587712930109	2.60095532030742	2.26720557616219	1.97216318304985	2.75300320321378	0	0	1.52038403247398
Tanc1	1.91304334097496	2.18103416648712	2.66881159069705	1.85623049348733	0	2.04550980668694	0	0	0	0	0	0	0	2.40153959170054	0	0	0	0	0.872041390770809	0	0	0	0	0	0	0	0	0	0	0	0	0	1.47824443665154	0	0	0	0	0	1.96001316875166	0	1.58401081863252	0	1.41564721758502	1.15155178662365	0	0	0	0	2.46146266167796
Rbms1	2.90804882529951	2.8160623434147	2.66881159069705	0	3.39808081451342	3.11555410684704	3.40445749978341	1.97723927763111	2.13107349438063	1.38188561121774	2.08532623654161	2.3010565219101	2.18138266187056	3.04833996478759	1.94471110814427	3.14723867129186	1.60529084532146	2.51024565995989	0	2.85270053515749	2.19438517880036	1.39910484519709	2.48097413751812	1.47615728415992	0	0	2.41596842294391	0	2.21848185153062	2.19120286332434	0	2.23831833982043	2.67696959153291	2.11841770637128	0	0	1.7022571258035	0	0	1.9189724933235	2.16893192398403	1.32587712930109	2.33770652829823	2.01347435610029	1.40930321104762	1.54167716546894	1.4935867112408	0	2.93756843496363
Cobll1	2.52950901854903	2.18103416648712	0	0	2.41612326882996	2.34433528574587	2.37018028595242	0	0	0	2.08532623654161	1.70335857875318	2.18138266187056	0	1.94471110814427	0	0	2.7774065362849	0	0	1.29696043990145	0	2.48097413751812	0	0	0	0	1.67845983215565	0	0	0	0	0	0	0	0	0	0	1.39864534214568	0	0	0	0	1.15155178662365	1.97216318304985	1.54167716546894	0	0	0
Stk39	0	0	0	0	1.48178229328473	3.37687120699747	0	0	0	0	0	0	2.18138266187056	0	0	0	0	0	0	0	0	0	1.53707526384671	0	2.75128570305625	0	0	1.15645633846224	0	0	0	1.33302966610564	0	0	0	0	0	0	0	0	0	0	0	0	0	0	0	0	0
Plcb4	0	2.18103416648712	0	1.85623049348733	0	2.20604334445495	0	0	0	0	0	0	1.5951915298159	0	0	0	0	0	1.3306698310669	2.01940121907183	0	0	0	2.04797595982601	0	1.72424673944707	1.48165090626768	0	0	0	0	1.33302966610564	0	0	0	0	1.7022571258035	1.45088903063211	1.39864534214568	1.9189724933235	0	0	0	1.15155178662365	1.40930321104762	0	1.4935867112408	2.70777024589321	1.52038403247398
Rrbp1	1.91304334097496	2.18103416648712	0	0	0	2.57410575972308	2.37018028595242	1.97723927763111	0	0	0	0	1.5951915298159	0	2.94311363974871	1.88219852107302	2.19261566157738	2.7774065362849	0	1.45088903063211	1.29696043990145	2.31793809794233	2.11648862170071	2.04797595982601	3.23624127539502	0	0	1.67845983215565	2.85570708473408	1.60402000419271	0	2.23831833982043	2.05033202914929	0	1.90084099868064	2.14293903016024	1.7022571258035	0	1.96001316875166	1.3627638637097	2.53555237564348	1.32587712930109	0	2.63752653956798	1.40930321104762	2.12164341369804	1.4935867112408	0	1.52038403247398
Dlgap4	1.91304334097496	0	0	0	0	1.30650411282277	0	0	1.55010236289611	0	0	1.70335857875318	1.5951915298159	0	0	0	1.60529084532146	0	1.88208052594231	0	1.84313693515726	0	0	0	0	0	0	0	0	1.60402000419271	0	0	0	0	0	0	0	2.37961268000602	0	0	0	0	0	1.15155178662365	0	1.54167716546894	0	0	2.0977679365713
Tox2	0	0	0	0	0	0	1.76638362943403	0	0	0	0	0	0	0	0	0	0	0	0	0	1.29696043990145	0	0	0	0	0	0	0	0	0	0	0	0	0	0	0	0	0	0	0	0	0	0	0	0	0	0	0	0
Gnas	0	2.18103416648712	0	1.85623049348733	2.25149761424116	0.852975988054207	0	0	1.55010236289611	0	0	1.1774793798721	0	2.40153959170054	0	0	0	0	0	0	0	0	0	0	1.77284598709209	1.72424673944707	0	0	1.62858967852153	0	0	2.49897918454256	0	2.74957154853009	1.90084099868064	2.14293903016024	1.7022571258035	1.45088903063211	0	0	0	0	1.41564721758502	0	0	0	0	0	0
Shroom4	3.18199141046548	3.47883221357539	0	1.85623049348733	3.33954384833649	1.30650411282277	2.37018028595242	1.97723927763111	2.13107349438063	0	0	3.05473833553502	2.18138266187056	2.40153959170054	0	2.49616449684084	2.19261566157738	2.51024565995989	1.88208052594231	0	2.45381513002962	2.58069294633775	2.74751896205043	1.47615728415992	0	2.32401285607585	1.48165090626768	1.15645633846224	2.21848185153062	2.19120286332434	1.5951915298159	1.33302966610564	2.05033202914929	2.95984153858702	1.90084099868064	1.56071546606206	2.81553497306106	3.17255304869043	2.31738806956212	2.27428131683119	1.58401081863252	1.87655600588813	1.41564721758502	2.26720557616219	2.80126800604919	2.12164341369804	2.69544810697013	0	1.52038403247398
Arhgef6	0	0	0	2.46802631430948	2.05432427253536	1.61737829430071	2.37018028595242	0	0	0	0	0	0	3.04833996478759	0	0	0	1.56220326605152	0	1.45088903063211	0	0	0	0	1.77284598709209	0	1.48165090626768	0	0	1.60402000419271	0	1.88479921201474	0	0	0	0	0	0	0	0	0	1.32587712930109	0	0	0	0	0	0	0
Las1l	0	2.18103416648712	0	0	1.48178229328473	1.30650411282277	2.37018028595242	0	2.13107349438063	1.9408699880354	0	1.70335857875318	0	0	0	1.88219852107302	0	0	1.64390993462428	0	0	0	0	1.47615728415992	0	0	2.05417604315834	0	0	1.60402000419271	0	0	0	0	0	0	0	0	0	0	0	0	0	0	1.40930321104762	0	1.4935867112408	0	0
Fnd3c2	0	0	0	0	0	0.852975988054207	1.76638362943403	0	0	0	0	1.1774793798721	0	2.40153959170054	0	0	0	0	0	0	0	0	0	0	0	0	0	0	0	0	0	0	0	0	0	0	0	0	0	0	0	0	0	0	0	0	1.4935867112408	0	0
Diaph2	1.91304334097496	0	0	0	2.25149761424116	2.46580536550488	0	2.97900952829312	1.55010236289611	0	0	0	0	0	1.94471110814427	0	0	2.1446012183338	2.07429610670219	1.45088903063211	1.84313693515726	1.96053737886324	2.48097413751812	0	2.37724451201169	0	1.48165090626768	2.27362959456693	2.21848185153062	1.60402000419271	0	0	0	0	1.90084099868064	2.50851588838906	1.17654765961443	1.45088903063211	2.31738806956212	2.27428131683119	1.58401081863252	1.32587712930109	1.97938681173799	0	1.40930321104762	0	0	2.07917908596773	0
Tsc22d3	0	0	0	1.85623049348733	0.993396610650691	2.20604334445495	2.74399514267271	0	0	0	0	0	0	0	0	0	0	0	0	0	0	0	0	0	0	0	0	0	0	0	0	0	0	0	0	0	0	0	0	0	0	0	0	1.15155178662365	0	0	0	0	0
Phf8	0	0	0	1.85623049348733	0.993396610650691	0.852975988054207	2.37018028595242	0	0	0	0	0	1.5951915298159	0	0	0	0	0	0	0	0	0	0	0	0	0	0	0	0	0	0	0	0	0	0	0	1.17654765961443	0	0	0	0	0	0	0	0	1.54167716546894	0	0	0
Pag1	0	0	0	0	1.48178229328473	0	0	0	0	0	0	0	0	0	0	0	0	1.56220326605152	1.3306698310669	0	0	0	0	0	0	0	0	0	0	0	0	0	1.47824443665154	0	0	0	0	0	0	0	0	0	0	0	0	0	0	0	1.52038403247398
Fndc3b	1.91304334097496	3.20137878589196	2.66881159069705	3.11787344929481	3.50578051650969	3.75525736454648	4.53414185097331	1.97723927763111	2.76303131715074	1.38188561121774	2.7143259804111	2.67256732729802	1.5951915298159	0	1.94471110814427	1.88219852107302	2.19261566157738	1.56220326605152	2.23545448879638	1.45088903063211	1.84313693515726	2.78857634862389	1.53707526384671	1.47615728415992	2.37724451201169	2.69630717369857	2.05417604315834	2.27362959456693	2.21848185153062	1.60402000419271	2.81643168929903	2.49897918454256	2.88626342805006	0	0	1.56071546606206	2.04504095614654	2.37961268000602	2.31738806956212	1.9189724933235	2.53555237564348	2.86749656850418	1.41564721758502	2.63752653956798	1.40930321104762	1.54167716546894	2.90499724711514	0	1.52038403247398
4932438A13Rik	0	2.18103416648712	3.72009844000801	1.85623049348733	0.993396610650691	1.61737829430071	0	0	0	1.38188561121774	0	1.1774793798721	0	3.04833996478759	0	1.88219852107302	2.19261566157738	0	0.872041390770809	0	1.29696043990145	0	0	1.47615728415992	0	0	1.48165090626768	0	2.21848185153062	0	1.5951915298159	1.33302966610564	0	0	0	1.56071546606206	1.17654765961443	0	0	0	2.16893192398403	1.32587712930109	0	1.15155178662365	1.40930321104762	0	1.4935867112408	2.07917908596773	0
Maml3	3.18199141046548	3.69578797825921	0	3.6583423116826	4.13058132844316	3.90153458207803	3.90190408616494	0	1.55010236289611	1.38188561121774	0	2.04621361751363	2.81643168929903	3.93575521967341	1.94471110814427	1.88219852107302	0	2.7774065362849	0.872041390770809	1.45088903063211	1.29696043990145	0	0	2.40949066696638	3.69139339805658	2.32401285607585	2.05417604315834	1.15645633846224	2.85570708473408	1.60402000419271	0	1.88479921201474	1.47824443665154	0	0	1.56071546606206	1.7022571258035	0	0	0	0	0	0	2.01347435610029	0	2.48634398088149	3.22570329330125	2.07917908596773	1.52038403247398
Magi3	3.39679973541275	2.8160623434147	0	0	2.55743950820537	2.760820992196	0	2.33545520646924	1.55010236289611	1.38188561121774	2.08532623654161	0	1.5951915298159	0	1.94471110814427	0	1.60529084532146	1.56220326605152	2.70256079394211	1.45088903063211	0	1.39910484519709	1.53707526384671	2.67445128820618	0	2.9669819002061	0	2.27362959456693	2.58701526350184	1.60402000419271	0	2.87667259255909	2.67696959153291	0	2.89450536427421	2.50851588838906	1.17654765961443	2.01940121907183	1.39864534214568	2.91462310594129	2.16893192398403	2.49005561298419	1.41564721758502	2.26720557616219	2.59319359378104	2.75300320321378	3.35425633554896	2.07917908596773	2.46146266167796
Bcar3	0	0	2.66881159069705	0	0.993396610650691	2.04550980668694	0	0	0	0	0	0	0	2.40153959170054	0	1.88219852107302	0	2.1446012183338	0	0	0	0	1.53707526384671	0	1.77284598709209	0	1.48165090626768	0	0	0	1.5951915298159	1.33302966610564	0	0	0	0	1.17654765961443	0	1.39864534214568	0	1.58401081863252	0	0	2.26720557616219	0	0	0	0	1.52038403247398
Camk2d	0	2.18103416648712	0	0	2.25149761424116	2.04550980668694	1.76638362943403	0	0	0	0	2.04621361751363	0	2.40153959170054	1.94471110814427	0	0	1.56220326605152	1.88208052594231	0	0	0	0	2.04797595982601	0	0	2.05417604315834	1.15645633846224	0	0	1.5951915298159	0	2.05033202914929	1.53879714164537	0	0	1.17654765961443	0	0	2.53590920424037	2.16893192398403	0	0	0	2.59319359378104	0	1.4935867112408	3.09075613461998	0
Adgrl2	1.91304334097496	2.18103416648712	2.66881159069705	0	2.79138102373777	1.61737829430071	0	2.33545520646924	2.13107349438063	2.76707474111005	2.08532623654161	1.1774793798721	0	0	0	2.49616449684084	2.19261566157738	1.56220326605152	1.3306698310669	0	2.19438517880036	2.58069294633775	0	2.04797595982601	0	1.72424673944707	1.48165090626768	2.64417957597193	0	2.55869531334854	2.18138266187056	1.33302966610564	2.05033202914929	0	1.90084099868064	2.50851588838906	1.17654765961443	1.45088903063211	2.31738806956212	0	1.58401081863252	1.32587712930109	1.41564721758502	1.15155178662365	0	0	1.4935867112408	3.09075613461998	1.52038403247398
Chd7	1.91304334097496	3.20137878589196	0	0	2.25149761424116	2.20604334445495	0	1.97723927763111	0	1.38188561121774	0	0	0	0	0	0	0	0	0.872041390770809	1.45088903063211	0	0	0	1.47615728415992	0	0	1.48165090626768	0	1.62858967852153	0	0	1.88479921201474	0	0	0	1.56071546606206	0	0	0	0	0	0	0	1.67263712047957	0	0	0	0	0
Bach2	0	0	0	0	2.89058900649081	2.20604334445495	0	1.41376060629237	0	1.38188561121774	0	0	0	0	0	0	0	0	0	0	0	0	0	0	0	1.72424673944707	0	0	0	0	0	0	0	0	1.90084099868064	0	0	0	0	0	0	0	0	1.67263712047957	0	0	0	2.07917908596773	0
Fam219a	1.91304334097496	0	0	2.46802631430948	0.993396610650691	0.852975988054207	2.37018028595242	0	1.55010236289611	0	0	0	0	0	0	0	0	0	0	0	0	1.39910484519709	0	2.04797595982601	1.77284598709209	0	1.48165090626768	0	0	0	0	0	0	0	0	0	0	0	0	0	0	0	0	0	0	0	0	0	0
Ptpn3	0	0	2.66881159069705	0	1.48178229328473	1.85418324576903	0	0	0	0	0	0	1.5951915298159	0	0	0	1.60529084532146	0	1.64390993462428	0	0	1.39910484519709	1.53707526384671	0	0	0	0	0	1.62858967852153	1.60402000419271	0	1.33302966610564	0	2.11841770637128	0	0	0	1.45088903063211	0	0	0	2.22963370157271	0	0	0	0	1.4935867112408	0	0
Lepr	0	0	0	1.85623049348733	0	1.61737829430071	2.37018028595242	0	0	0	0	0	0	0	0	0	0	0	0	0	0	0	0	0	0	0	1.48165090626768	0	0	0	0	0	0	0	0	0	0	0	0	0	0	0	0	0	0	0	0	0	0
Plpp3	0	0	2.66881159069705	0	0	2.57410575972308	1.76638362943403	1.41376060629237	1.55010236289611	2.55952043750021	0	0	0	2.40153959170054	2.56365802305712	0	0	0	0	0	1.29696043990145	0	0	0	2.37724451201169	0	0	0	1.62858967852153	1.60402000419271	0	0	0	0	0	0	0	0	1.39864534214568	0	0	0	0	2.01347435610029	0	0	0	0	0
Glis1	0	0	0	0	2.6812358016196	1.61737829430071	2.37018028595242	0	1.55010236289611	0	0	0	0	0	1.94471110814427	0	1.60529084532146	0	0	0	0	0	0	0	0	0	1.48165090626768	0	0	0	0	0	1.47824443665154	0	0	0	1.17654765961443	0	0	0	0	0	0	0	1.40930321104762	0	0	0	0
Kazn	0	0	0	0	0.993396610650691	0.852975988054207	1.76638362943403	1.41376060629237	0	0	0	0	0	0	0	0	0	1.56220326605152	0.872041390770809	0	0	0	1.53707526384671	0	0	0	1.48165090626768	0	0	0	0	0	0	0	1.90084099868064	1.56071546606206	0	0	1.39864534214568	0	1.58401081863252	0	1.41564721758502	0	1.40930321104762	1.54167716546894	1.4935867112408	0	2.0977679365713
Rere	2.90804882529951	2.8160623434147	2.66881159069705	3.11787344929481	2.89058900649081	3.17356626482458	2.74399514267271	3.25389933558693	2.76303131715074	1.38188561121774	2.08532623654161	2.94282989221254	3.02753929531507	3.43786618529924	3.21753280238655	3.14723867129186	2.82833265294939	2.7774065362849	2.79175836307285	3.17255304869043	3.49340963556567	2.78857634862389	3.40809818462659	3.05666665395977	3.23624127539502	2.69630717369857	2.68107742091688	2.64417957597193	2.85570708473408	3.21237080360388	2.54849309702186	3.02274474921761	3.05924411685647	2.74957154853009	3.70967760165162	3.6538291148668	2.50272952740634	3.51657938597531	2.58012903104834	3.4035202630783	1.58401081863252	2.69647908846502	2.80914711775572	3.29424933500271	2.97341581803438	2.48634398088149	3.35425633554896	3.09075613461998	3.50152021159249
Gnb1	0	3.47883221357539	2.66881159069705	0	2.25149761424116	2.842548448194	0	0	1.55010236289611	2.76707474111005	0	1.1774793798721	0	2.40153959170054	0	0	2.19261566157738	1.56220326605152	2.60462085903904	1.45088903063211	1.84313693515726	2.31793809794233	1.53707526384671	2.67445128820618	2.37724451201169	2.69630717369857	1.48165090626768	2.01968459887662	1.62858967852153	2.19120286332434	0	2.49897918454256	1.47824443665154	0	1.90084099868064	0	2.50272952740634	2.01940121907183	0	1.3627638637097	2.16893192398403	1.87655600588813	2.33770652829823	2.26720557616219	2.80126800604919	3.28492348945209	0	0	2.0977679365713
Cdk14	0	2.18103416648712	0	0	0	2.46580536550488	0	1.41376060629237	1.55010236289611	0	0	1.1774793798721	0	0	0	2.87377852583086	0	0	0	0	0	0	0	2.40949066696638	0	1.72424673944707	0	1.15645633846224	3.06728093671552	0	1.5951915298159	0	0	2.11841770637128	0	0	1.17654765961443	0	0	0	0	0	0	0	0	0	0	0	1.52038403247398
Sema3e	1.91304334097496	0	0	1.85623049348733	2.05432427253536	2.46580536550488	0	0	0	0	0	0	1.5951915298159	0	0	0	0	0	1.3306698310669	0	0	0	0	0	1.77284598709209	1.72424673944707	1.48165090626768	1.15645633846224	1.62858967852153	0	0	0	0	2.11841770637128	0	2.14293903016024	0	0	0	0	0	0	0	2.26720557616219	0	0	0	0	0
Afap1	0	0	0	1.85623049348733	2.55743950820537	2.57410575972308	1.76638362943403	0	0	0	0	0	0	0	0	0	0	0	1.3306698310669	0	0	0	0	0	0	0	0	1.15645633846224	1.62858967852153	0	0	1.33302966610564	0	0	0	0	0	0	0	0	0	0	0	1.15155178662365	0	0	1.4935867112408	0	0
Adgra3	1.91304334097496	0	0	0	0	1.30650411282277	0	0	0	1.38188561121774	0	1.1774793798721	2.18138266187056	0	0	0	1.60529084532146	0	0.872041390770809	0	0	0	0	0	0	1.72424673944707	0	1.67845983215565	0	1.60402000419271	0	2.23831833982043	0	0	0	0	1.17654765961443	0	0	0	2.16893192398403	1.32587712930109	1.41564721758502	1.15155178662365	1.97216318304985	1.54167716546894	0	0	0
N4bp2	0	0	0	1.85623049348733	2.05432427253536	0.852975988054207	3.22875893044464	2.59864824950816	1.55010236289611	1.38188561121774	2.08532623654161	1.1774793798721	2.18138266187056	2.40153959170054	0	0	0	0	1.64390993462428	1.45088903063211	0	1.39910484519709	0	0	0	0	2.05417604315834	2.27362959456693	1.62858967852153	2.55869531334854	2.18138266187056	0	0	0	0	0	2.04504095614654	0	2.58012903104834	1.3627638637097	1.58401081863252	0	1.41564721758502	1.67263712047957	0	1.54167716546894	2.06763174829063	0	0
Rbm47	0	0	0	0	1.80848109200444	2.67181488268295	1.76638362943403	0	0	0	2.08532623654161	1.1774793798721	0	3.71748252236686	0	0	0	0	0.872041390770809	2.64387605511248	1.84313693515726	0	1.53707526384671	1.47615728415992	0	0	0	0	0	0	0	0	0	0	0	0	1.17654765961443	0	0	1.3627638637097	0	1.32587712930109	0	0	1.40930321104762	0	0	0	0
Apbb2	2.52950901854903	0	0	2.84483403817121	2.25149761424116	2.842548448194	0	2.59864824950816	2.13107349438063	1.38188561121774	2.7143259804111	2.50396614623693	2.18138266187056	2.40153959170054	1.94471110814427	2.87377852583086	1.60529084532146	1.56220326605152	1.88208052594231	2.01940121907183	2.65961616702502	2.31793809794233	1.53707526384671	2.40949066696638	1.77284598709209	2.32401285607585	2.68107742091688	2.27362959456693	2.85570708473408	0	2.81643168929903	2.49897918454256	2.05033202914929	1.53879714164537	2.51632773563111	0	2.04504095614654	2.01940121907183	1.39864534214568	1.3627638637097	2.16893192398403	2.22963370157271	0	0	1.40930321104762	2.12164341369804	2.43002059530923	2.07917908596773	3.11101834958997
Kit	0	0	0	1.85623049348733	0	0	0	0	0	0	0	0	0	0	0	0	0	0	0	0	0	0	0	0	0	0	0	0	0	0	0	0	0	0	0	0	0	0	0	0	0	0	0	0	0	0	0	0	0
Wdfy3	1.91304334097496	2.8160623434147	0	2.46802631430948	2.25149761424116	2.46580536550488	3.22875893044464	0	2.9734745190851	2.76707474111005	2.08532623654161	2.50396614623693	2.18138266187056	2.40153959170054	0	2.49616449684084	2.56016275079556	1.56220326605152	2.07429610670219	2.01940121907183	2.45381513002962	2.31793809794233	1.53707526384671	2.04797595982601	1.77284598709209	2.32401285607585	1.48165090626768	2.01968459887662	1.62858967852153	2.19120286332434	1.5951915298159	0	2.05033202914929	2.48298383639514	0	0	0	2.01940121907183	1.96001316875166	0	3.01417791702267	2.69647908846502	1.41564721758502	2.46941119446707	1.97216318304985	2.48634398088149	1.4935867112408	0	2.0977679365713
Tgfbr3	0	0	0	0	2.25149761424116	2.20604334445495	0	0	0	0	0	1.1774793798721	0	3.04833996478759	1.94471110814427	1.88219852107302	0	0	0	0	0	0	1.53707526384671	0	0	0	0	0	0	1.60402000419271	0	0	0	0	0	0	0	0	0	0	0	0	0	1.15155178662365	0	0	0	0	0
2900026A02Rik	0	0	0	0	1.48178229328473	1.61737829430071	0	0	0	0	2.7143259804111	0	0	0	0	0	1.60529084532146	0	0	0	1.29696043990145	0	0	0	2.37724451201169	0	0	1.15645633846224	0	0	0	0	0	0	0	0	0	0	0	0	0	0	0	0	1.40930321104762	0	1.4935867112408	2.07917908596773	0
Git2	0	0	3.32667631438741	0	1.80848109200444	2.04550980668694	3.22875893044464	2.33545520646924	0	1.38188561121774	2.08532623654161	0	1.5951915298159	0	2.56365802305712	0	1.60529084532146	0	1.64390993462428	0	0	0	1.53707526384671	0	0	1.72424673944707	0	1.15645633846224	0	0	0	1.33302966610564	0	0	0	0	1.17654765961443	1.45088903063211	1.39864534214568	1.3627638637097	0	1.32587712930109	0	1.15155178662365	0	0	1.4935867112408	0	0
Sppl3	0	0	2.66881159069705	1.85623049348733	2.05432427253536	1.30650411282277	0	1.41376060629237	1.55010236289611	1.38188561121774	2.08532623654161	1.1774793798721	0	0	1.94471110814427	0	0	0	2.07429610670219	0	1.84313693515726	1.39910484519709	0	0	0	0	0	1.67845983215565	2.58701526350184	0	2.18138266187056	1.88479921201474	0	0	2.89450536427421	1.56071546606206	0	0	1.39864534214568	0	1.58401081863252	0	2.33770652829823	1.67263712047957	1.40930321104762	1.54167716546894	2.06763174829063	0	0
Fbxo21	0	0	0	0	0	0.852975988054207	0	0	0	0	0	0	0	0	0	0	0	0	0	0	0	0	1.53707526384671	0	0	0	1.48165090626768	1.15645633846224	0	0	0	1.33302966610564	1.47824443665154	0	0	0	1.17654765961443	2.64387605511248	0	1.9189724933235	0	1.32587712930109	0	0	1.40930321104762	0	1.4935867112408	0	2.0977679365713
Fbxw8	0	2.18103416648712	0	1.85623049348733	2.41612326882996	2.04550980668694	2.74399514267271	0	1.55010236289611	1.9408699880354	2.08532623654161	0	2.18138266187056	2.40153959170054	1.94471110814427	2.49616449684084	2.19261566157738	1.56220326605152	1.88208052594231	1.45088903063211	0	0	1.53707526384671	1.47615728415992	1.77284598709209	1.72424673944707	1.48165090626768	2.27362959456693	1.62858967852153	0	0	1.88479921201474	2.05033202914929	1.53879714164537	1.90084099868064	1.56071546606206	1.17654765961443	1.45088903063211	1.39864534214568	0	1.58401081863252	1.32587712930109	1.97938681173799	2.01347435610029	1.97216318304985	0	1.4935867112408	0	1.52038403247398
Hectd4	0	0	0	0	1.48178229328473	2.20604334445495	0	1.41376060629237	0	0	0	0	0	0	0	0	0	1.56220326605152	1.3306698310669	1.45088903063211	1.29696043990145	0	0	2.40949066696638	1.77284598709209	0	0	1.15645633846224	0	1.60402000419271	0	0	0	0	0	0	0	0	1.39864534214568	0	0	1.32587712930109	0	1.15155178662365	0	0	0	0	1.52038403247398
Pitpnm2	0	0	0	0	0.993396610650691	0.852975988054207	1.76638362943403	0	0	0	0	0	0	2.40153959170054	1.94471110814427	0	0	0	1.3306698310669	0	0	0	0	1.47615728415992	0	0	2.05417604315834	0	0	0	1.5951915298159	0	0	0	0	0	0	0	0	0	0	0	0	0	1.40930321104762	0	0	0	0
Clip2	1.91304334097496	0	2.66881159069705	1.85623049348733	0	0	0	0	0	0	0	1.1774793798721	0	0	0	0	0	0	0	0	0	0	0	0	0	0	0	1.15645633846224	2.21848185153062	0	0	1.33302966610564	0	2.11841770637128	0	0	0	0	0	1.3627638637097	0	0	0	0	0	0	0	0	0
Slc7a1	2.90804882529951	2.18103416648712	2.66881159069705	0	1.48178229328473	1.30650411282277	0	0	1.55010236289611	0	0	1.1774793798721	2.18138266187056	3.04833996478759	0	0	0	1.56220326605152	2.37420961810282	2.01940121907183	1.29696043990145	0	2.11648862170071	1.47615728415992	0	0	0	1.67845983215565	1.62858967852153	0	0	2.70555243660648	2.41195246552605	1.53879714164537	1.90084099868064	1.56071546606206	0	2.01940121907183	2.31738806956212	1.3627638637097	1.58401081863252	1.32587712930109	0	1.15155178662365	2.33013285941581	2.48634398088149	0	0	0
Ube2h	0	2.8160623434147	0	1.85623049348733	3.06361020076055	2.20604334445495	2.74399514267271	0	0	0	2.08532623654161	2.50396614623693	1.5951915298159	0	0	0	1.60529084532146	1.56220326605152	0.872041390770809	0	2.19438517880036	1.96053737886324	2.11648862170071	1.47615728415992	0	1.72424673944707	2.89042842635735	1.15645633846224	0	0	1.5951915298159	2.70555243660648	0	0	1.90084099868064	1.56071546606206	1.17654765961443	0	1.39864534214568	0	1.58401081863252	1.32587712930109	2.33770652829823	1.15155178662365	2.33013285941581	1.54167716546894	1.4935867112408	2.70777024589321	2.46146266167796
Podxl	0	0	3.32667631438741	0	0.993396610650691	0.852975988054207	0	0	0	0	0	2.04621361751363	0	0	0	1.88219852107302	0	0	0	0	0	0	0	2.04797595982601	1.77284598709209	0	1.48165090626768	0	0	0	0	1.33302966610564	0	0	0	2.14293903016024	0	0	0	0	0	0	0	1.15155178662365	0	0	0	0	0
Cald1	2.90804882529951	2.18103416648712	2.66881159069705	0	1.80848109200444	2.46580536550488	2.74399514267271	0	0	0	0	0	0	0	0	0	0	0	0	2.01940121907183	1.29696043990145	0	0	0	0	0	0	0	0	0	0	0	1.47824443665154	0	0	0	0	0	0	1.3627638637097	1.58401081863252	0	1.41564721758502	1.67263712047957	1.40930321104762	1.54167716546894	0	0	0
Snx10	0	0	0	0	0	1.30650411282277	0	0	0	0	0	0	0	2.40153959170054	0	0	0	0	0	0	0	0	0	0	0	0	0	0	0	0	0	0	0	0	0	0	0	0	0	0	0	1.32587712930109	0	0	0	0	0	0	0
Chn2	0	0	0	0	0	1.61737829430071	1.76638362943403	0	0	0	0	0	0	0	0	0	0	0	0	0	0	0	0	0	0	0	1.48165090626768	0	0	0	0	0	0	0	0	0	0	0	0	0	0	0	0	0	0	0	0	0	0
Ccser1	2.90804882529951	2.18103416648712	2.66881159069705	1.85623049348733	2.25149761424116	3.37687120699747	0	0	0	0	2.7143259804111	0	0	2.40153959170054	0	0	0	0	0	0	0	0	0	0	0	0	0	1.15645633846224	1.62858967852153	0	0	1.33302966610564	0	1.53879714164537	0	0	0	0	0	0	0	0	1.41564721758502	1.15155178662365	0	0	1.4935867112408	2.07917908596773	0
Gng12	2.90804882529951	0	0	0	2.6812358016196	2.46580536550488	2.37018028595242	1.41376060629237	1.55010236289611	1.9408699880354	2.08532623654161	1.70335857875318	0	0	0	0	2.19261566157738	1.56220326605152	2.07429610670219	0	0	0	0	2.40949066696638	0	1.72424673944707	2.05417604315834	0	2.58701526350184	1.60402000419271	1.5951915298159	2.49897918454256	1.47824443665154	1.53879714164537	1.90084099868064	2.14293903016024	1.7022571258035	2.37961268000602	2.31738806956212	2.27428131683119	0	1.32587712930109	0	2.26720557616219	0	2.12164341369804	2.06763174829063	2.70777024589321	0
Dysf	0	0	2.66881159069705	0	2.98083698700294	0.852975988054207	1.76638362943403	0	0	0	0	0	0	0	0	0	1.60529084532146	0	0	0	0	0	0	0	0	0	0	0	0	0	0	0	0	0	0	0	0	1.45088903063211	1.39864534214568	1.3627638637097	0	1.32587712930109	1.41564721758502	1.67263712047957	0	0	2.06763174829063	0	2.46146266167796
Mgll	0	0	0	0	1.48178229328473	1.85418324576903	0	0	0	0	0	0	0	0	0	0	0	0	0.872041390770809	0	0	0	0	0	0	0	0	0	0	0	0	0	0	0	0	0	0	0	0	0	0	0	0	0	0	0	0	0	0
Srgap3	1.91304334097496	0	0	2.84483403817121	3.39808081451342	2.46580536550488	2.74399514267271	0	0	0	0	0	0	0	0	0	0	0	0	0	0	0	0	0	0	0	0	0	0	0	0	1.33302966610564	0	0	0	0	0	0	0	0	0	0	0	0	0	1.54167716546894	2.06763174829063	2.07917908596773	0
Pparg	0	0	0	1.85623049348733	2.25149761424116	2.34433528574587	2.37018028595242	3.36738165768742	2.9734745190851	1.38188561121774	0	2.04621361751363	0	2.40153959170054	1.94471110814427	3.14723867129186	0	3.43896004609334	1.88208052594231	2.01940121907183	3.40915781589356	1.96053737886324	2.74751896205043	2.40949066696638	0	3.7489075304532	2.41596842294391	1.67845983215565	2.21848185153062	2.55869531334854	2.18138266187056	2.23831833982043	2.67696959153291	3.52432448933254	0	1.56071546606206	0	0	1.96001316875166	0	2.16893192398403	0	1.41564721758502	2.01347435610029	1.40930321104762	1.54167716546894	2.06763174829063	2.07917908596773	1.52038403247398
Wnk1	0	2.18103416648712	0	1.85623049348733	2.25149761424116	2.34433528574587	2.74399514267271	1.97723927763111	2.13107349438063	0	2.7143259804111	0	3.02753929531507	3.04833996478759	0	1.88219852107302	2.82833265294939	2.51024565995989	1.64390993462428	0	2.19438517880036	1.96053737886324	2.11648862170071	1.47615728415992	1.77284598709209	1.72424673944707	2.05417604315834	0	1.62858967852153	3.03806921055322	2.81643168929903	1.33302966610564	1.47824443665154	2.95984153858702	2.89450536427421	0	2.50272952740634	2.37961268000602	1.96001316875166	0	2.8032312236574	1.32587712930109	1.41564721758502	2.01347435610029	0	2.12164341369804	1.4935867112408	0	2.46146266167796
Mical3	0	2.18103416648712	2.66881159069705	2.84483403817121	2.89058900649081	3.42183755499754	1.76638362943403	2.59864824950816	2.13107349438063	1.38188561121774	0	2.81680118902279	1.5951915298159	0	0	0	2.56016275079556	2.98803214185806	1.3306698310669	0	1.29696043990145	0	1.53707526384671	1.47615728415992	1.77284598709209	1.72424673944707	1.48165090626768	1.67845983215565	1.62858967852153	0	0	1.33302966610564	2.05033202914929	0	0	0	0	1.45088903063211	1.39864534214568	0	0	1.32587712930109	1.97938681173799	2.01347435610029	1.40930321104762	2.48634398088149	2.43002059530923	3.58322731674572	1.52038403247398
Tspan9	0	0	3.72009844000801	3.11787344929481	2.98083698700294	2.760820992196	2.37018028595242	1.41376060629237	0	0	0	0	2.18138266187056	0	3.75983365238939	0	0	0	0.872041390770809	0	0	1.39910484519709	0	0	0	0	0	1.15645633846224	0	0	0	1.33302966610564	0	0	0	1.56071546606206	1.7022571258035	1.45088903063211	0	0	0	2.22963370157271	1.41564721758502	0	1.97216318304985	0	2.43002059530923	0	0
Klf13	0	0	0	2.84483403817121	1.80848109200444	1.61737829430071	0	1.41376060629237	0	1.38188561121774	0	2.04621361751363	1.5951915298159	0	0	0	0	0	0	0	0	0	0	1.47615728415992	0	1.72424673944707	0	0	0	0	0	1.33302966610564	1.47824443665154	0	0	0	0	1.45088903063211	0	1.9189724933235	0	0	0	1.15155178662365	0	1.54167716546894	0	0	0
Homer2	0	0	0	0	0.993396610650691	0.852975988054207	0	1.41376060629237	1.55010236289611	0	0	0	0	0	0	0	0	0	0	0	0	0	0	0	0	0	0	0	0	0	0	0	1.47824443665154	0	0	0	0	0	0	0	0	0	0	0	0	0	0	0	0
Fam168a	2.90804882529951	2.18103416648712	0	0	0.993396610650691	2.842548448194	0	0	1.55010236289611	2.29729225585432	2.7143259804111	1.1774793798721	0	3.43786618529924	0	0	1.60529084532146	0	2.49603677823847	0	1.84313693515726	1.39910484519709	0	2.04797595982601	0	2.69630717369857	2.05417604315834	0	0	0	2.81643168929903	1.88479921201474	1.47824443665154	0	0	1.56071546606206	2.50272952740634	1.45088903063211	1.39864534214568	1.3627638637097	0	0	1.97938681173799	0	2.80126800604919	1.54167716546894	1.4935867112408	2.07917908596773	2.72758649628067
Fchsd2	0	0	0	1.85623049348733	1.48178229328473	1.61737829430071	0	0	0	1.38188561121774	0	0	0	0	0	1.88219852107302	1.60529084532146	1.56220326605152	0.872041390770809	0	1.29696043990145	1.39910484519709	0	1.47615728415992	0	1.72424673944707	0	1.15645633846224	0	0	0	0	2.05033202914929	2.11841770637128	2.89450536427421	0	1.7022571258035	0	1.39864534214568	0	0	1.32587712930109	1.41564721758502	0	1.40930321104762	0	2.06763174829063	0	0
Ppfibp2	0	0	0	2.46802631430948	0	1.61737829430071	0	0	0	0	0	0	0	0	0	0	0	0	0	0	0	0	0	0	0	0	0	0	0	0	0	0	0	0	0	0	0	0	0	0	0	0	0	0	1.40930321104762	0	0	0	0
Parva	2.90804882529951	0	0	0	2.89058900649081	3.17356626482458	1.76638362943403	0	0	0	0	0	0	2.40153959170054	1.94471110814427	1.88219852107302	0	0	0	1.45088903063211	0	0	1.53707526384671	1.47615728415992	0	0	0	0	0	0	1.5951915298159	0	0	0	0	0	0	0	0	0	0	0	0	1.15155178662365	0	1.54167716546894	0	2.07917908596773	0
Dock1	3.18199141046548	2.18103416648712	0	0	0	3.65597808004734	2.74399514267271	0	0	0	0	0	0	0	0	0	1.60529084532146	0	1.64390993462428	0	0	0	0	2.40949066696638	0	1.72424673944707	1.48165090626768	0	0	1.60402000419271	0	2.87667259255909	1.47824443665154	0	1.90084099868064	0	0	0	1.39864534214568	0	1.58401081863252	2.49005561298419	1.41564721758502	2.63752653956798	2.33013285941581	2.48634398088149	2.43002059530923	0	0
Eps8l2	2.90804882529951	0	0	2.46802631430948	2.25149761424116	1.30650411282277	3.01546833466672	0	0	0	2.7143259804111	1.70335857875318	2.18138266187056	0	1.94471110814427	1.88219852107302	1.60529084532146	2.7774065362849	1.64390993462428	0	0	1.39910484519709	1.53707526384671	1.47615728415992	1.77284598709209	0	2.05417604315834	2.01968459887662	2.21848185153062	1.60402000419271	0	1.88479921201474	0	2.74957154853009	0	0	0	0	0	0	0	0	1.41564721758502	1.67263712047957	1.40930321104762	2.12164341369804	0	0	2.0977679365713
Plekhg1	1.91304334097496	0	3.32667631438741	0	0	2.57410575972308	2.74399514267271	0	0	1.9408699880354	0	0	0	0	0	0	0	0	0	0	0	0	0	0	0	0	1.48165090626768	0	0	0	0	1.33302966610564	0	0	0	0	0	0	0	0	0	0	0	0	0	1.54167716546894	0	0	0
Adgrg6	0	0	2.66881159069705	2.46802631430948	3.06361020076055	1.61737829430071	3.6837986735327	0	0	0	0	0	0	3.04833996478759	1.94471110814427	0	0	0	1.3306698310669	1.45088903063211	0	0	2.11648862170071	0	0	0	0	0	0	2.19120286332434	0	2.23831833982043	0	1.53879714164537	0	0	0	2.37961268000602	0	0	1.58401081863252	0	0	0	0	0	1.4935867112408	0	0
Arhgap18	0	0	0	2.46802631430948	1.48178229328473	1.30650411282277	2.37018028595242	0	0	0	0	0	0	0	0	0	0	0	0.872041390770809	1.45088903063211	0	0	0	0	0	0	0	0	0	0	0	0	0	0	0	0	0	0	0	0	1.58401081863252	0	0	1.15155178662365	1.97216318304985	0	0	2.07917908596773	0
Fyn	1.91304334097496	0	0	0	0	1.61737829430071	0	0	0	1.38188561121774	0	0	0	0	0	0	0	0	1.3306698310669	1.45088903063211	0	0	0	0	0	0	1.48165090626768	0	0	0	0	0	0	0	0	0	0	0	0	0	0	0	0	0	0	1.54167716546894	0	0	0
Lims1	0	0	0	2.46802631430948	1.80848109200444	2.04550980668694	1.76638362943403	1.41376060629237	0	1.38188561121774	0	0	0	0	1.94471110814427	0	2.19261566157738	1.56220326605152	0.872041390770809	2.01940121907183	1.29696043990145	2.78857634862389	1.53707526384671	0	2.37724451201169	1.72424673944707	2.05417604315834	2.01968459887662	2.21848185153062	1.60402000419271	2.54849309702186	1.88479921201474	2.05033202914929	2.11841770637128	1.90084099868064	1.56071546606206	2.04504095614654	0	2.31738806956212	1.9189724933235	2.53555237564348	0	0	2.01347435610029	1.40930321104762	0	2.69544810697013	0	0
Cdh23	0	0	0	0	0	2.20604334445495	0	0	0	0	0	0	0	0	0	0	0	0	0	0	0	0	0	0	0	0	0	0	0	0	0	0	0	0	0	0	0	0	0	0	0	0	0	0	0	0	0	0	0
Herc4	0	0	0	0	0	1.30650411282277	0	0	0	1.38188561121774	0	1.70335857875318	1.5951915298159	0	1.94471110814427	0	0	1.56220326605152	1.88208052594231	1.45088903063211	0	2.31793809794233	1.53707526384671	2.40949066696638	0	0	0	2.01968459887662	2.21848185153062	1.60402000419271	2.18138266187056	0	2.05033202914929	1.53879714164537	1.90084099868064	0	1.7022571258035	1.45088903063211	1.39864534214568	0	1.58401081863252	1.32587712930109	1.41564721758502	0	2.33013285941581	1.54167716546894	1.4935867112408	2.07917908596773	0
Cdk17	0	0	0	1.85623049348733	0.993396610650691	1.61737829430071	2.74399514267271	0	0	0	0	1.70335857875318	0	0	0	0	0	1.56220326605152	0	0	0	0	0	0	0	0	0	0	0	0	0	0	1.47824443665154	1.53879714164537	0	0	1.17654765961443	1.45088903063211	0	1.9189724933235	0	1.87655600588813	0	1.15155178662365	0	0	1.4935867112408	0	0
Tmcc3	0	2.18103416648712	0	0	1.80848109200444	2.67181488268295	1.76638362943403	0	0	0	2.08532623654161	0	0	0	1.94471110814427	0	0	0	0	0	0	0	0	0	2.37724451201169	0	0	0	0	0	0	0	0	0	0	1.56071546606206	0	0	1.39864534214568	0	0	0	0	0	0	1.54167716546894	0	0	0
Atp2b1	0	0	2.66881159069705	0	1.80848109200444	1.61737829430071	1.76638362943403	0	1.55010236289611	1.38188561121774	2.08532623654161	1.1774793798721	2.18138266187056	0	1.94471110814427	1.88219852107302	1.60529084532146	1.56220326605152	0.872041390770809	0	0	0	2.11648862170071	2.40949066696638	0	0	2.41596842294391	1.67845983215565	0	0	0	0	0	0	0	1.56071546606206	1.17654765961443	2.01940121907183	1.39864534214568	0	0	0	0	1.15155178662365	1.40930321104762	0	0	0	2.46146266167796
Pawr	1.91304334097496	0	0	1.85623049348733	3.06361020076055	2.20604334445495	2.37018028595242	2.33545520646924	0	0	0	0	0	0	1.94471110814427	0	0	0	0.872041390770809	0	0	1.96053737886324	1.53707526384671	1.47615728415992	0	0	0	0	0	0	1.5951915298159	0	0	1.53879714164537	2.51632773563111	0	1.17654765961443	0	0	0	1.58401081863252	1.32587712930109	0	0	1.40930321104762	0	0	0	0
Osbpl8	0	0	2.66881159069705	1.85623049348733	2.05432427253536	1.30650411282277	1.76638362943403	0	0	0	0	1.1774793798721	0	0	0	0	0	1.56220326605152	0.872041390770809	1.45088903063211	0	1.39910484519709	1.53707526384671	1.47615728415992	0	0	1.48165090626768	0	0	0	2.18138266187056	0	0	0	0	0	0	0	0	1.3627638637097	0	0	1.41564721758502	1.15155178662365	0	1.54167716546894	1.4935867112408	0	0
Arhgef25	1.91304334097496	0	0	1.85623049348733	0.993396610650691	0	0	1.41376060629237	0	0	0	0	0	0	0	0	0	0	0	0	0	0	0	0	0	0	0	0	0	0	1.5951915298159	0	0	1.53879714164537	0	0	0	0	0	0	0	0	0	0	0	0	0	0	0
Rbms2	0	0	0	0	1.48178229328473	1.61737829430071	2.37018028595242	1.41376060629237	0	1.38188561121774	0	1.70335857875318	1.5951915298159	0	0	0	2.56016275079556	1.56220326605152	1.64390993462428	1.45088903063211	0	1.39910484519709	0	1.47615728415992	0	1.72424673944707	1.48165090626768	1.67845983215565	0	0	0	1.33302966610564	0	0	0	2.14293903016024	1.17654765961443	1.45088903063211	0	1.9189724933235	0	0	0	1.15155178662365	0	0	0	0	1.52038403247398
Mfhas1	0	0	0	0	1.48178229328473	0	0	0	0	0	0	0	0	0	1.94471110814427	0	0	0	0	1.45088903063211	0	0	0	0	1.77284598709209	0	0	0	0	0	0	0	0	0	0	0	0	0	0	0	0	0	0	0	0	0	0	2.07917908596773	0
Dlc1	1.91304334097496	2.18103416648712	0	1.85623049348733	1.48178229328473	1.30650411282277	2.37018028595242	1.41376060629237	0	0	0	0	1.5951915298159	0	0	0	0	0	0.872041390770809	0	1.29696043990145	1.39910484519709	0	1.47615728415992	0	0	0	0	0	0	0	0	0	0	0	0	0	0	0	0	1.58401081863252	1.32587712930109	1.41564721758502	1.15155178662365	1.97216318304985	1.54167716546894	0	2.07917908596773	1.52038403247398
Psd3	0	0	0	0	0	1.85418324576903	0	0	0	0	0	0	0	0	1.94471110814427	0	0	0	0	1.45088903063211	0	0	0	1.47615728415992	0	0	0	0	1.62858967852153	1.60402000419271	0	0	0	0	0	0	0	0	0	1.3627638637097	0	0	0	0	1.40930321104762	0	1.4935867112408	0	0
Csgalnact1	2.90804882529951	0	0	0	1.80848109200444	0.852975988054207	0	0	0	0	0	0	0	0	1.94471110814427	0	0	0	0	0	0	0	0	0	0	0	1.48165090626768	0	0	0	0	0	1.47824443665154	0	0	1.56071546606206	1.17654765961443	0	0	0	0	0	0	0	0	1.54167716546894	0	2.07917908596773	0
Zfp423	0	0	0	0	0.993396610650691	2.20604334445495	0	0	0	0	0	0	0	0	0	0	0	0	0	0	0	0	0	0	0	0	0	0	0	0	0	0	0	0	1.90084099868064	0	0	0	0	0	0	0	0	0	0	0	0	0	0
Adcy7	1.91304334097496	0	0	2.46802631430948	2.55743950820537	1.85418324576903	3.22875893044464	1.41376060629237	2.49616449684084	1.38188561121774	0	2.04621361751363	1.5951915298159	2.40153959170054	0	2.49616449684084	2.19261566157738	0	1.3306698310669	2.01940121907183	2.19438517880036	0	1.53707526384671	0	2.37724451201169	0	1.48165090626768	2.01968459887662	2.21848185153062	1.60402000419271	0	0	2.41195246552605	1.53879714164537	0	1.56071546606206	0	0	0	0	1.58401081863252	1.32587712930109	0	1.15155178662365	1.97216318304985	0	0	3.09075613461998	1.52038403247398
Cdh3	3.18199141046548	0	0	1.85623049348733	2.25149761424116	1.30650411282277	2.37018028595242	1.41376060629237	0	0	0	0	1.5951915298159	2.40153959170054	0	0	0	1.56220326605152	0.872041390770809	0	1.84313693515726	0	1.53707526384671	0	0	0	0	0	0	0	0	1.33302966610564	0	0	1.90084099868064	0	1.7022571258035	0	1.39864534214568	0	1.58401081863252	0	0	1.15155178662365	0	0	0	0	0
Cdh1	0	0	0	1.85623049348733	0	0	0	2.59864824950816	2.13107349438063	1.38188561121774	3.09746040728121	1.1774793798721	1.5951915298159	0	0	2.49616449684084	2.56016275079556	2.51024565995989	2.49603677823847	2.01940121907183	0	1.96053737886324	1.53707526384671	2.40949066696638	2.75128570305625	2.32401285607585	3.21090123561324	2.01968459887662	2.58701526350184	2.82683627979852	2.18138266187056	3.02274474921761	2.41195246552605	2.48298383639514	0	1.56071546606206	1.7022571258035	2.01940121907183	1.39864534214568	1.9189724933235	2.53555237564348	2.69647908846502	2.33770652829823	2.01347435610029	2.33013285941581	1.54167716546894	2.43002059530923	2.07917908596773	2.0977679365713
Znrf1	0	0	0	2.46802631430948	0	2.04550980668694	0	0	0	0	0	0	0	0	0	0	0	0	0	2.37961268000602	0	0	0	0	0	0	0	0	0	0	0	0	0	0	0	1.56071546606206	0	0	0	0	0	1.32587712930109	0	0	0	0	1.4935867112408	0	0
Hsd17b2	0	0	0	0	2.79138102373777	0	1.76638362943403	0	0	0	0	0	0	0	0	0	0	0	0	0	0	0	0	0	0	0	0	0	0	0	0	0	0	0	0	0	0	0	0	0	0	0	0	0	0	0	0	0	0
Pard3	3.39679973541275	2.18103416648712	3.32667631438741	2.46802631430948	3.27736608016329	2.91809823466174	1.76638362943403	2.59864824950816	2.76303131715074	2.76707474111005	2.08532623654161	2.81680118902279	1.5951915298159	0	2.56365802305712	2.49616449684084	2.82833265294939	0	2.87364719989309	2.64387605511248	2.19438517880036	3.84531837228929	2.95776232952398	2.88370995942054	2.37724451201169	0	3.06344812008563	3.12616792069372	2.85570708473408	2.82683627979852	2.81643168929903	2.49897918454256	2.88626342805006	2.74957154853009	2.51632773563111	3.16011740643441	2.50272952740634	1.45088903063211	3.10673557612204	3.30184804769461	3.18828479692277	3.68177462849019	2.60095532030742	2.26720557616219	2.80126800604919	2.48634398088149	2.69544810697013	0	2.46146266167796
Flnb	2.90804882529951	3.47883221357539	3.72009844000801	2.84483403817121	4.41423692247348	2.20604334445495	3.55385047398893	2.33545520646924	1.55010236289611	1.9408699880354	2.08532623654161	2.67256732729802	2.81643168929903	0	3.43263334384202	3.14723867129186	2.19261566157738	2.7774065362849	1.88208052594231	2.64387605511248	2.65961616702502	2.58069294633775	1.53707526384671	3.20407404182546	2.75128570305625	3.17978044948193	1.48165090626768	2.91393603224347	2.21848185153062	1.60402000419271	3.20175564766422	2.49897918454256	2.67696959153291	2.11841770637128	0	2.50851588838906	2.04504095614654	2.64387605511248	0	2.27428131683119	1.58401081863252	2.69647908846502	1.97938681173799	1.67263712047957	2.33013285941581	0	2.06763174829063	2.70777024589321	1.52038403247398
Dock5	0	2.18103416648712	0	1.85623049348733	3.21106440538844	2.67181488268295	2.37018028595242	1.41376060629237	0	0	2.08532623654161	1.1774793798721	0	0	0	0	1.60529084532146	0	0	1.45088903063211	0	0	1.53707526384671	0	0	0	0	0	1.62858967852153	0	1.5951915298159	1.33302966610564	1.47824443665154	2.11841770637128	0	0	1.17654765961443	0	0	0	0	1.32587712930109	1.41564721758502	2.01347435610029	0	1.54167716546894	2.06763174829063	0	0
Slc39a14	0	0	2.66881159069705	0	0	2.04550980668694	0	0	0	0	0	0	1.5951915298159	0	0	0	0	0	0	0	0	1.39910484519709	0	0	0	0	0	0	0	0	0	0	0	0	0	0	0	0	0	0	0	1.32587712930109	0	0	0	0	0	0	0
Farp1	0	2.18103416648712	2.66881159069705	0	0	2.46580536550488	1.76638362943403	1.41376060629237	2.49616449684084	1.38188561121774	2.7143259804111	2.04621361751363	1.5951915298159	0	0	1.88219852107302	0	0	0.872041390770809	1.45088903063211	2.45381513002962	0	2.48097413751812	1.47615728415992	2.75128570305625	0	2.41596842294391	1.15645633846224	0	0	1.5951915298159	1.33302966610564	2.05033202914929	1.53879714164537	1.90084099868064	0	1.17654765961443	1.45088903063211	1.39864534214568	1.3627638637097	1.58401081863252	1.87655600588813	1.41564721758502	2.46941119446707	0	2.48634398088149	2.43002059530923	2.07917908596773	2.0977679365713
Dock9	0	2.18103416648712	0	0	2.98083698700294	2.67181488268295	3.22875893044464	1.97723927763111	0	1.38188561121774	0	0	2.54849309702186	2.40153959170054	2.56365802305712	0	0	2.1446012183338	1.3306698310669	0	0	0	0	0	0	0	2.68107742091688	1.67845983215565	1.62858967852153	0	0	1.88479921201474	0	0	1.90084099868064	0	1.17654765961443	2.01940121907183	1.39864534214568	1.3627638637097	0	1.32587712930109	1.41564721758502	2.01347435610029	1.97216318304985	2.48634398088149	0	0	0
St3gal4	2.52950901854903	2.18103416648712	3.32667631438741	0	0.993396610650691	2.04550980668694	2.37018028595242	0	0	0	2.08532623654161	0	0	2.40153959170054	2.56365802305712	2.87377852583086	0	0	0.872041390770809	1.45088903063211	1.29696043990145	0	0	0	0	0	0	0	1.62858967852153	0	0	0	0	0	0	0	0	0	1.39864534214568	0	0	0	0	1.15155178662365	0	0	0	0	0
Stra6	1.91304334097496	0	0	0	0	2.34433528574587	1.76638362943403	0	0	0	0	1.1774793798721	0	0	0	0	0	0	0	0	0	0	0	0	0	0	0	0	0	0	0	0	0	0	0	0	0	0	0	0	0	0	0	0	1.40930321104762	0	0	0	0
Uaca	0	0	0	1.85623049348733	0	0	0	0	1.55010236289611	0	2.08532623654161	0	1.5951915298159	0	0	0	0	1.56220326605152	1.3306698310669	0	0	1.39910484519709	1.53707526384671	0	3.41198937790146	0	2.41596842294391	0	0	0	1.5951915298159	0	0	0	0	1.56071546606206	0	0	0	0	2.16893192398403	1.32587712930109	0	1.15155178662365	0	0	2.06763174829063	0	0
Tcf12	2.90804882529951	2.18103416648712	2.66881159069705	1.85623049348733	2.79138102373777	2.46580536550488	3.01546833466672	2.33545520646924	0	2.55952043750021	2.08532623654161	1.70335857875318	1.5951915298159	3.04833996478759	2.56365802305712	0	2.82833265294939	2.51024565995989	2.07429610670219	2.37961268000602	2.83020667073977	2.58069294633775	3.13139037355954	2.88370995942054	2.37724451201169	1.72424673944707	2.05417604315834	2.64417957597193	2.21848185153062	1.60402000419271	0	3.15017413051673	2.41195246552605	2.74957154853009	0	1.56071546606206	2.67131361394878	3.17255304869043	2.58012903104834	2.53590920424037	2.53555237564348	1.87655600588813	2.60095532030742	2.90716225226908	2.59319359378104	1.54167716546894	0	3.09075613461998	2.0977679365713
Ppp2r3a	0	0	3.32667631438741	0	1.80848109200444	2.20604334445495	0	1.97723927763111	0	0	0	1.1774793798721	0	0	0	1.88219852107302	2.19261566157738	1.56220326605152	1.64390993462428	2.64387605511248	0	2.58069294633775	0	2.04797595982601	0	0	0	1.15645633846224	0	0	1.5951915298159	1.33302966610564	0	1.53879714164537	0	0	1.17654765961443	0	1.39864534214568	2.27428131683119	1.58401081863252	1.87655600588813	1.97938681173799	0	0	2.12164341369804	1.4935867112408	0	2.0977679365713
Rab6b	0	0	0	0	1.48178229328473	0	2.37018028595242	0	0	0	0	0	0	0	0	0	0	0	0	0	0	0	0	0	0	0	0	0	0	0	0	0	1.47824443665154	0	0	0	1.17654765961443	0	0	0	0	0	0	0	0	0	0	0	0
Tmem108	0	2.18103416648712	0	2.46802631430948	0	2.46580536550488	2.37018028595242	0	0	1.38188561121774	0	1.70335857875318	0	0	0	0	0	0	0	0	0	1.96053737886324	1.53707526384671	0	0	0	0	0	0	0	0	0	0	0	0	0	0	0	1.39864534214568	0	0	0	0	1.15155178662365	0	0	0	0	0
Ctdspl	1.91304334097496	2.18103416648712	0	1.85623049348733	2.55743950820537	2.20604334445495	2.37018028595242	0	0	2.55952043750021	0	1.1774793798721	1.5951915298159	0	0	0	1.60529084532146	0	1.3306698310669	1.45088903063211	0	1.39910484519709	2.95776232952398	2.40949066696638	0	1.72424673944707	0	1.67845983215565	1.62858967852153	0	2.18138266187056	2.70555243660648	2.41195246552605	0	1.90084099868064	2.14293903016024	0	2.64387605511248	0	2.53590920424037	1.58401081863252	0	0	2.26720557616219	2.33013285941581	2.48634398088149	2.06763174829063	2.07917908596773	2.93756843496363
Tns3	0	0	0	0	2.79138102373777	1.61737829430071	0	0	0	0	0	1.1774793798721	0	0	0	1.88219852107302	0	0	1.3306698310669	1.45088903063211	0	0	2.48097413751812	1.47615728415992	0	0	0	0	0	0	0	1.33302966610564	0	1.53879714164537	0	1.56071546606206	1.17654765961443	0	0	0	0	0	1.41564721758502	0	2.33013285941581	0	0	0	1.52038403247398
Spred2	0	0	0	0	1.80848109200444	0	0	0	0	0	0	0	0	0	0	0	0	0	0	0	0	0	1.53707526384671	0	0	0	0	0	0	0	0	0	0	0	0	0	0	0	0	1.9189724933235	0	1.32587712930109	0	1.67263712047957	0	0	2.43002059530923	0	1.52038403247398
Ccnjl	0	0	0	0	1.48178229328473	1.61737829430071	0	0	0	0	0	0	0	0	0	0	0	0	0	0	0	0	0	0	0	0	0	0	0	0	0	0	0	0	0	0	0	0	0	0	0	0	0	0	0	0	0	0	0
Mprip	0	0	2.66881159069705	0	1.48178229328473	1.85418324576903	0	1.97723927763111	1.55010236289611	1.9408699880354	0	2.3010565219101	1.5951915298159	0	2.94311363974871	0	0	2.1446012183338	1.64390993462428	2.37961268000602	1.29696043990145	2.58069294633775	1.53707526384671	1.47615728415992	1.77284598709209	1.72424673944707	0	1.67845983215565	0	2.19120286332434	2.18138266187056	1.88479921201474	1.47824443665154	1.53879714164537	1.90084099868064	1.56071546606206	1.7022571258035	0	0	1.3627638637097	2.16893192398403	0	1.97938681173799	1.67263712047957	1.40930321104762	2.12164341369804	0	0	1.52038403247398
Specc1	0	0	0	0	2.05432427253536	0	0	0	1.55010236289611	0	2.08532623654161	0	1.5951915298159	2.40153959170054	0	0	0	0	0	0	1.29696043990145	0	0	0	0	0	0	1.15645633846224	0	0	0	0	0	0	0	0	1.7022571258035	0	0	0	0	0	0	0	1.40930321104762	0	0	0	0
Ntn1	0	0	0	0	0	2.04550980668694	1.76638362943403	0	0	0	0	0	0	0	0	0	0	0	0	0	0	0	0	0	0	0	0	0	0	0	0	0	0	0	0	0	0	0	0	0	0	0	0	0	0	0	0	0	0
Med13	1.91304334097496	0	0	0	0	1.61737829430071	0	1.41376060629237	1.55010236289611	0	0	2.04621361751363	0	2.40153959170054	0	0	1.60529084532146	0	1.64390993462428	2.01940121907183	1.29696043990145	1.96053737886324	0	0	0	0	2.05417604315834	0	0	1.60402000419271	0	1.33302966610564	2.05033202914929	0	0	0	1.7022571258035	0	0	2.27428131683119	0	1.87655600588813	2.33770652829823	1.15155178662365	0	0	2.06763174829063	0	0
Grb2	0	3.20137878589196	2.66881159069705	0	2.05432427253536	2.04550980668694	0	1.41376060629237	0	0	2.08532623654161	1.1774793798721	2.54849309702186	0	3.21753280238655	0	2.19261566157738	0	2.37420961810282	0	2.19438517880036	2.31793809794233	0	2.40949066696638	0	2.69630717369857	0	0	0	1.60402000419271	2.18138266187056	0	2.41195246552605	0	1.90084099868064	0	1.17654765961443	1.45088903063211	1.39864534214568	0	0	1.32587712930109	0	1.15155178662365	2.80126800604919	0	0	2.07917908596773	1.52038403247398
Ube2o	1.91304334097496	0	0	0	1.80848109200444	1.61737829430071	0	0	1.55010236289611	0	0	1.1774793798721	0	0	0	0	2.19261566157738	0	1.64390993462428	2.37961268000602	0	0	0	1.47615728415992	0	0	1.48165090626768	0	0	1.60402000419271	1.5951915298159	0	1.47824443665154	1.53879714164537	0	0	1.17654765961443	0	0	1.3627638637097	0	0	1.41564721758502	1.15155178662365	0	0	0	2.07917908596773	1.52038403247398
Sept9	0	2.18103416648712	0	1.85623049348733	0	3.28037647483057	1.76638362943403	1.41376060629237	0	1.38188561121774	0	1.1774793798721	0	0	0	0	0	1.56220326605152	1.64390993462428	1.45088903063211	0	1.39910484519709	2.48097413751812	1.47615728415992	0	1.72424673944707	0	0	1.62858967852153	2.19120286332434	0	1.88479921201474	2.41195246552605	0	1.90084099868064	1.56071546606206	0	0	1.39864534214568	2.27428131683119	1.58401081863252	0	2.33770652829823	2.01347435610029	0	0	1.4935867112408	2.07917908596773	1.52038403247398
Dsp	0	0	0	0	2.05432427253536	2.04550980668694	1.76638362943403	0	0	0	2.08532623654161	1.1774793798721	1.5951915298159	0	0	0	0	1.56220326605152	0	1.45088903063211	1.29696043990145	0	0	1.47615728415992	0	0	0	1.15645633846224	1.62858967852153	0	1.5951915298159	0	0	0	0	0	0	0	0	1.3627638637097	0	0	0	0	1.40930321104762	2.12164341369804	1.4935867112408	0	1.52038403247398
Kif13a	0	2.18103416648712	0	0	1.80848109200444	1.61737829430071	0	0	2.13107349438063	1.9408699880354	0	0	0	0	0	0	1.60529084532146	0	1.3306698310669	0	1.29696043990145	0	1.53707526384671	1.47615728415992	0	0	0	1.15645633846224	0	0	0	0	0	1.53879714164537	0	0	1.17654765961443	0	0	1.9189724933235	0	0	0	2.01347435610029	0	0	0	2.07917908596773	0
Ctsq	0	0	0	0	1.48178229328473	2.20604334445495	1.76638362943403	0	0	0	0	0	0	0	0	0	0	0	0	0	0	0	0	0	0	0	0	0	0	0	0	0	0	0	0	0	0	0	0	0	0	0	0	0	0	0	0	0	0
Map1b	0	2.18103416648712	0	2.46802631430948	3.81132202478372	2.04550980668694	3.55385047398893	0	0	0	0	0	0	0	0	0	0	0	0	1.45088903063211	0	0	0	0	2.75128570305625	0	0	0	0	0	0	0	1.47824443665154	0	0	0	0	0	0	0	0	0	0	1.15155178662365	1.40930321104762	0	0	0	0
Pik3r1	0	0	0	0	0.993396610650691	1.85418324576903	0	0	0	0	0	1.1774793798721	0	0	0	0	0	0	0	0	0	0	0	0	0	0	0	0	1.62858967852153	0	0	0	0	1.53879714164537	1.90084099868064	0	0	0	1.96001316875166	0	0	0	1.41564721758502	0	0	0	0	0	0
Pde4d	1.91304334097496	0	3.32667631438741	2.46802631430948	2.55743950820537	2.20604334445495	3.01546833466672	0	0	0	0	0	0	0	1.94471110814427	0	0	0	0.872041390770809	0	1.29696043990145	0	0	1.47615728415992	0	0	1.48165090626768	2.27362959456693	0	0	1.5951915298159	0	2.05033202914929	0	1.90084099868064	2.50851588838906	0	0	0	1.3627638637097	1.58401081863252	0	0	1.15155178662365	1.97216318304985	0	1.4935867112408	0	1.52038403247398
Plpp1	2.52950901854903	0	3.72009844000801	0	2.41612326882996	0	0	0	0	1.38188561121774	0	2.04621361751363	2.18138266187056	0	0	1.88219852107302	1.60529084532146	0	2.07429610670219	0	0	0	0	0	1.77284598709209	0	0	1.15645633846224	0	0	1.5951915298159	0	0	1.53879714164537	0	0	1.17654765961443	0	0	0	0	0	0	0	0	0	1.4935867112408	0	0
Dnmt3a	1.91304334097496	2.18103416648712	0	0	1.80848109200444	2.46580536550488	0	0	0	0	0	0	1.5951915298159	0	1.94471110814427	1.88219852107302	0	0	0	0	0	0	0	2.04797595982601	0	0	2.05417604315834	0	0	0	0	0	0	0	2.51632773563111	1.56071546606206	0	0	0	1.3627638637097	0	0	1.41564721758502	2.63752653956798	1.40930321104762	0	2.06763174829063	0	1.52038403247398
Efr3b	0	0	0	0	0	0	1.76638362943403	0	0	0	0	0	0	0	0	0	0	0	0	1.45088903063211	0	0	0	0	0	0	0	0	0	0	0	0	0	0	0	0	0	1.45088903063211	0	0	0	0	0	0	0	1.54167716546894	0	0	0
Daam1	0	0	0	1.85623049348733	1.80848109200444	2.20604334445495	0	0	0	1.38188561121774	0	1.1774793798721	1.5951915298159	0	0	0	0	0	1.88208052594231	0	0	0	0	1.47615728415992	3.0228775895135	0	1.48165090626768	1.15645633846224	0	0	0	1.33302966610564	0	1.53879714164537	0	2.9862442135648	0	1.45088903063211	1.39864534214568	0	0	1.87655600588813	0	1.67263712047957	1.97216318304985	0	0	0	0
Prkch	2.90804882529951	2.18103416648712	0	0	2.25149761424116	1.61737829430071	0	1.41376060629237	0	0	0	1.1774793798721	0	0	0	0	1.60529084532146	0	0	0	0	1.39910484519709	0	2.04797595982601	0	0	0	0	0	1.60402000419271	0	0	0	1.53879714164537	1.90084099868064	0	1.17654765961443	0	1.39864534214568	2.27428131683119	0	1.32587712930109	1.41564721758502	2.26720557616219	0	2.48634398088149	0	2.07917908596773	1.52038403247398
Fut8	0	0	0	1.85623049348733	0.993396610650691	1.85418324576903	2.37018028595242	2.80680525230705	0	1.9408699880354	2.08532623654161	0	0	2.40153959170054	1.94471110814427	0	1.60529084532146	0	0.872041390770809	2.37961268000602	2.19438517880036	0	0	0	0	0	0	0	0	0	0	0	0	0	0	2.14293903016024	0	0	0	1.3627638637097	1.58401081863252	1.32587712930109	1.41564721758502	1.15155178662365	1.40930321104762	1.54167716546894	0	2.07917908596773	0
Sipa1l1	0	0	0	2.84483403817121	2.41612326882996	2.34433528574587	3.01546833466672	2.59864824950816	1.55010236289611	1.9408699880354	0	1.70335857875318	1.5951915298159	0	0	0	2.19261566157738	2.1446012183338	1.3306698310669	1.45088903063211	1.84313693515726	2.31793809794233	0	2.40949066696638	2.75128570305625	0	3.3393798520823	1.67845983215565	1.62858967852153	1.60402000419271	2.18138266187056	0	2.05033202914929	1.53879714164537	1.90084099868064	0	1.17654765961443	1.45088903063211	1.39864534214568	2.53590920424037	2.53555237564348	0	1.41564721758502	2.26720557616219	1.40930321104762	0	2.06763174829063	2.07917908596773	0
Dpf3	0	0	0	1.85623049348733	2.25149761424116	2.67181488268295	2.74399514267271	0	0	0	2.08532623654161	1.1774793798721	1.5951915298159	2.40153959170054	0	0	0	2.1446012183338	1.64390993462428	0	0	2.31793809794233	0	1.47615728415992	2.37724451201169	0	1.48165090626768	1.67845983215565	0	0	0	0	2.67696959153291	1.53879714164537	2.89450536427421	1.56071546606206	1.17654765961443	1.45088903063211	1.39864534214568	0	1.58401081863252	1.32587712930109	1.97938681173799	2.01347435610029	2.33013285941581	3.13699399283929	0	0	2.0977679365713
Ston2	0	0	0	0	0.993396610650691	1.61737829430071	0	1.41376060629237	0	0	0	0	0	0	0	0	0	0	0	0	0	0	0	1.47615728415992	1.77284598709209	0	0	0	0	0	0	1.33302966610564	0	0	0	0	0	1.45088903063211	0	0	0	0	1.97938681173799	0	0	0	0	2.07917908596773	0
Ttc7b	1.91304334097496	0	0	1.85623049348733	1.48178229328473	1.30650411282277	1.76638362943403	0	1.55010236289611	0	0	0	0	0	2.56365802305712	0	1.60529084532146	0	0	0	1.29696043990145	0	2.11648862170071	1.47615728415992	0	2.9669819002061	0	1.67845983215565	1.62858967852153	2.55869531334854	1.5951915298159	0	0	1.53879714164537	0	1.56071546606206	1.17654765961443	0	1.39864534214568	1.3627638637097	1.58401081863252	0	0	0	2.33013285941581	0	0	2.07917908596773	0
Rcor1	1.91304334097496	2.18103416648712	0	0	0.993396610650691	2.04550980668694	2.74399514267271	1.41376060629237	0	0	2.08532623654161	1.70335857875318	0	2.40153959170054	3.43263334384202	0	0	2.1446012183338	1.88208052594231	1.45088903063211	1.29696043990145	0	2.11648862170071	1.47615728415992	1.77284598709209	0	2.05417604315834	1.67845983215565	1.62858967852153	1.60402000419271	0	2.23831833982043	2.05033202914929	0	0	1.56071546606206	0	0	1.39864534214568	0	0	0	1.41564721758502	2.01347435610029	1.97216318304985	2.48634398088149	2.43002059530923	0	2.46146266167796
Exoc3l4	1.91304334097496	0	0	0	0	0.852975988054207	1.76638362943403	0	0	0	0	0	0	0	0	0	0	0	0	0	0	0	0	0	1.77284598709209	0	0	1.15645633846224	0	1.60402000419271	1.5951915298159	0	0	0	0	0	0	0	0	0	0	0	1.41564721758502	0	0	0	0	0	0
Inf2	0	0	0	1.85623049348733	0	0	0	0	0	0	0	0	0	0	0	0	0	0	0	1.45088903063211	0	0	0	0	0	0	0	0	0	0	1.5951915298159	0	0	0	0	0	0	0	0	0	0	0	1.97938681173799	0	1.40930321104762	0	2.06763174829063	2.07917908596773	2.0977679365713
Lifr	0	0	0	2.46802631430948	1.48178229328473	2.04550980668694	2.74399514267271	0	0	0	0	0	0	2.40153959170054	2.56365802305712	0	0	0	0	0	0	0	0	0	0	0	1.48165090626768	0	0	0	0	0	0	0	0	0	0	0	0	0	0	0	0	1.67263712047957	0	2.12164341369804	0	0	0
Myo10	2.52950901854903	2.18103416648712	0	0	2.89058900649081	2.46580536550488	3.40445749978341	0	1.55010236289611	1.38188561121774	0	2.04621361751363	0	2.40153959170054	0	0	2.19261566157738	1.56220326605152	1.3306698310669	1.45088903063211	2.19438517880036	1.96053737886324	0	1.47615728415992	0	0	1.48165090626768	1.15645633846224	0	0	0	1.33302966610564	0	0	2.51632773563111	0	0	0	2.31738806956212	1.3627638637097	0	0	1.41564721758502	1.67263712047957	0	1.54167716546894	2.06763174829063	0	0
Ext1	0	2.18103416648712	2.66881159069705	2.46802631430948	3.9836387449057	3.28037647483057	1.76638362943403	1.41376060629237	1.55010236289611	0	2.08532623654161	2.04621361751363	0	0	0	1.88219852107302	1.60529084532146	1.56220326605152	2.49603677823847	1.45088903063211	2.45381513002962	0	2.11648862170071	2.04797595982601	2.37724451201169	0	1.48165090626768	1.15645633846224	1.62858967852153	0	0	1.33302966610564	0	0	2.51632773563111	1.56071546606206	2.04504095614654	1.45088903063211	1.96001316875166	1.3627638637097	1.58401081863252	1.87655600588813	2.98137517916811	0	1.40930321104762	0	1.4935867112408	2.70777024589321	1.52038403247398
Slc45a4	0	0	0	0	0.993396610650691	0.852975988054207	1.76638362943403	0	0	0	2.08532623654161	0	1.5951915298159	0	0	0	0	0	0	1.45088903063211	1.29696043990145	0	0	0	0	1.72424673944707	0	0	0	0	0	1.33302966610564	0	0	0	0	0	0	0	0	0	0	0	1.67263712047957	0	0	0	2.07917908596773	1.52038403247398
Plec	0	0	0	0	2.79138102373777	1.85418324576903	1.76638362943403	0	0	0	0	1.70335857875318	1.5951915298159	0	2.56365802305712	0	0	1.56220326605152	0.872041390770809	0	0	0	1.53707526384671	2.04797595982601	1.77284598709209	0	0	0	0	0	0	0	1.47824443665154	0	1.90084099868064	1.56071546606206	1.7022571258035	0	1.39864534214568	0	0	1.32587712930109	0	0	0	0	0	0	0
Myh9	3.18199141046548	2.18103416648712	0	1.85623049348733	3.77298567717839	2.91809823466174	3.22875893044464	1.41376060629237	1.55010236289611	2.29729225585432	3.09746040728121	2.04621361751363	1.5951915298159	0	2.56365802305712	0	1.60529084532146	2.7774065362849	1.3306698310669	1.45088903063211	0	1.39910484519709	2.48097413751812	0	1.77284598709209	1.72424673944707	2.05417604315834	1.67845983215565	2.85570708473408	0	1.5951915298159	1.88479921201474	0	2.48298383639514	1.90084099868064	2.50851588838906	1.17654765961443	2.01940121907183	2.58012903104834	1.3627638637097	0	0	1.41564721758502	2.01347435610029	1.40930321104762	0	2.43002059530923	2.07917908596773	1.52038403247398
Tcf20	3.39679973541275	3.47883221357539	2.66881159069705	1.85623049348733	1.80848109200444	2.98833899921873	1.76638362943403	3.72444059037292	2.49616449684084	1.9408699880354	2.08532623654161	3.40785382460931	3.35007640896516	0	2.56365802305712	1.88219852107302	3.03958349943121	2.98803214185806	2.60462085903904	2.37961268000602	3.31714908419416	2.78857634862389	1.53707526384671	2.40949066696638	2.37724451201169	2.32401285607585	2.89042842635735	2.78812642589462	2.21848185153062	3.03806921055322	3.35007640896516	2.49897918454256	2.88626342805006	3.13348771802684	2.51632773563111	2.77564086932778	1.7022571258035	2.64387605511248	3.23465791868719	2.27428131683119	2.16893192398403	3.14086644680827	0	2.63752653956798	3.12023564030744	0	2.69544810697013	0	2.72758649628067
Pacsin2	0	2.18103416648712	0	0	0.993396610650691	2.20604334445495	1.76638362943403	0	0	1.38188561121774	0	1.70335857875318	2.18138266187056	0	3.75983365238939	0	1.60529084532146	2.51024565995989	0	2.01940121907183	1.84313693515726	1.39910484519709	2.11648862170071	1.47615728415992	1.77284598709209	0	1.48165090626768	1.67845983215565	0	2.19120286332434	0	1.33302966610564	1.47824443665154	0	0	0	0	0	0	0	0	0	1.41564721758502	0	1.40930321104762	0	2.06763174829063	0	0
Lpp	3.18199141046548	2.18103416648712	2.66881159069705	1.85623049348733	4.18380221630039	3.11555410684704	3.01546833466672	2.80680525230705	1.55010236289611	0	0	2.50396614623693	1.5951915298159	2.40153959170054	1.94471110814427	1.88219852107302	0	0	0.872041390770809	2.64387605511248	1.29696043990145	1.96053737886324	0	2.67445128820618	0	0	0	2.27362959456693	0	3.03806921055322	2.18138266187056	2.49897918454256	2.67696959153291	1.53879714164537	3.16825929270841	2.14293903016024	1.7022571258035	1.45088903063211	2.31738806956212	1.3627638637097	2.53555237564348	2.86749656850418	2.33770652829823	1.67263712047957	2.59319359378104	2.96331757928424	2.06763174829063	0	1.52038403247398
Arhgap31	1.91304334097496	0	2.66881159069705	3.11787344929481	2.05432427253536	2.842548448194	0	0	0	0	2.7143259804111	0	0	0	0	0	0	0	1.3306698310669	0	0	1.39910484519709	0	2.04797595982601	0	2.32401285607585	0	0	0	1.60402000419271	0	2.23831833982043	2.05033202914929	0	2.89450536427421	1.56071546606206	1.17654765961443	0	0	1.3627638637097	1.58401081863252	0	1.41564721758502	1.67263712047957	1.97216318304985	1.54167716546894	1.4935867112408	2.70777024589321	0
Bbx	1.91304334097496	2.18103416648712	2.66881159069705	3.5084782983892	2.79138102373777	2.57410575972308	2.37018028595242	1.41376060629237	2.13107349438063	1.9408699880354	2.08532623654161	1.70335857875318	0	0	0	0	0	0	2.37420961810282	2.37961268000602	1.29696043990145	1.96053737886324	2.11648862170071	2.67445128820618	2.75128570305625	2.32401285607585	2.05417604315834	1.67845983215565	1.62858967852153	2.19120286332434	0	2.49897918454256	2.05033202914929	3.13348771802684	1.90084099868064	1.56071546606206	2.04504095614654	0	1.39864534214568	2.53590920424037	1.58401081863252	2.86749656850418	1.41564721758502	0	1.40930321104762	2.48634398088149	2.69544810697013	3.36700621975155	2.0977679365713
Nrip1	0	0	0	0	2.41612326882996	2.57410575972308	0	1.41376060629237	1.55010236289611	1.38188561121774	2.08532623654161	1.1774793798721	0	2.40153959170054	1.94471110814427	0	0	0	1.3306698310669	0	0	1.39910484519709	1.53707526384671	2.04797595982601	0	2.69630717369857	1.48165090626768	1.15645633846224	0	0	0	1.33302966610564	0	2.11841770637128	0	0	0	0	0	0	0	1.32587712930109	0	1.15155178662365	1.40930321104762	0	1.4935867112408	0	2.0977679365713
App	2.52950901854903	2.18103416648712	2.66881159069705	2.84483403817121	2.6812358016196	2.20604334445495	3.55385047398893	0	0	1.38188561121774	2.08532623654161	1.1774793798721	1.5951915298159	0	1.94471110814427	0	0	1.56220326605152	0	1.45088903063211	1.29696043990145	1.96053737886324	0	0	0	0	0	0	0	0	0	2.23831833982043	0	0	1.90084099868064	0	0	0	0	0	0	0	0	2.01347435610029	1.40930321104762	2.12164341369804	0	0	0
Arid1b	1.91304334097496	0	2.66881159069705	0	1.80848109200444	3.17356626482458	1.76638362943403	1.41376060629237	0	0	0	2.04621361751363	2.18138266187056	2.40153959170054	1.94471110814427	1.88219852107302	0	2.51024565995989	1.64390993462428	0	0	0	2.48097413751812	1.47615728415992	0	0	2.41596842294391	1.15645633846224	1.62858967852153	0	2.18138266187056	0	1.47824443665154	1.53879714164537	0	0	0	1.45088903063211	0	0	2.53555237564348	0	1.41564721758502	2.26720557616219	1.97216318304985	3.52788234029531	0	2.07917908596773	1.52038403247398
Pde10a	1.91304334097496	0	0	2.84483403817121	3.50578051650969	3.05396815083096	3.79878587752032	0	0	0	0	0	0	0	0	0	0	0	0	0	0	0	0	0	0	0	1.48165090626768	0	0	0	0	0	0	0	0	0	0	0	0	0	0	0	0	0	0	0	0	0	0
Park2	0	2.18103416648712	0	1.85623049348733	0	1.85418324576903	0	0	0	0	2.7143259804111	0	0	0	1.94471110814427	0	0	0	0	0	0	1.39910484519709	0	0	0	0	0	0	0	0	0	0	0	0	0	0	0	0	0	0	0	0	0	0	1.40930321104762	1.54167716546894	0	0	0
Lnpep	0	2.8160623434147	0	0	0	1.85418324576903	0	0	1.55010236289611	0	0	1.1774793798721	0	0	0	0	0	0	1.3306698310669	0	1.29696043990145	0	1.53707526384671	1.47615728415992	0	0	1.48165090626768	0	0	0	0	2.49897918454256	0	0	0	0	0	1.45088903063211	0	1.3627638637097	0	2.22963370157271	0	0	0	2.48634398088149	0	0	0
Caskin1	0	0	0	1.85623049348733	2.25149761424116	1.30650411282277	1.76638362943403	0	0	0	2.08532623654161	2.04621361751363	0	0	0	0	0	1.56220326605152	0.872041390770809	0	0	0	0	0	1.77284598709209	0	1.48165090626768	0	1.62858967852153	0	0	0	1.47824443665154	0	0	0	0	0	0	1.3627638637097	1.58401081863252	0	0	1.15155178662365	0	0	0	0	0
Capn15	0	0	0	0	0	1.61737829430071	1.76638362943403	2.33545520646924	0	0	2.08532623654161	1.1774793798721	0	0	0	0	1.60529084532146	1.56220326605152	0.872041390770809	0	1.29696043990145	0	0	0	0	0	0	0	1.62858967852153	0	1.5951915298159	1.88479921201474	2.05033202914929	0	1.90084099868064	0	0	1.45088903063211	0	0	0	0	1.41564721758502	1.67263712047957	0	0	2.06763174829063	0	0
Adgrf5	0	0	0	0	2.25149761424116	0.852975988054207	2.37018028595242	1.41376060629237	0	0	0	0	0	0	0	0	0	0	0	0	1.29696043990145	0	0	0	0	0	1.48165090626768	0	0	0	0	0	0	0	0	0	0	0	0	0	0	0	1.41564721758502	0	0	0	0	0	0
AI661453	1.91304334097496	0	0	1.85623049348733	0	0.852975988054207	0	0	0	0	0	0	0	0	0	0	0	0	0	1.45088903063211	0	0	0	0	0	0	2.05417604315834	0	0	0	0	0	0	1.53879714164537	0	0	0	0	0	0	0	1.32587712930109	0	0	0	0	0	0	1.52038403247398
Fbxl17	3.39679973541275	2.18103416648712	3.32667631438741	0	2.55743950820537	2.34433528574587	2.37018028595242	1.41376060629237	0	0	0	0	0	0	0	0	0	0	2.23545448879638	2.37961268000602	0	2.58069294633775	0	2.67445128820618	2.37724451201169	1.72424673944707	0	0	2.21848185153062	2.55869531334854	0	2.49897918454256	1.47824443665154	0	1.90084099868064	1.56071546606206	1.17654765961443	0	2.31738806956212	0	0	2.22963370157271	0	1.15155178662365	1.40930321104762	0	1.4935867112408	0	0
Arhgap28	0	2.18103416648712	0	0	0.993396610650691	2.91809823466174	0	1.41376060629237	0	1.38188561121774	0	0	2.54849309702186	2.40153959170054	0	1.88219852107302	2.19261566157738	0	2.07429610670219	1.45088903063211	0	0	2.11648862170071	1.47615728415992	1.77284598709209	0	0	0	0	1.60402000419271	1.5951915298159	0	0	2.11841770637128	0	2.14293903016024	1.7022571258035	0	0	0	1.58401081863252	0	0	0	0	0	0	0	0
Mta3	0	0	0	0	1.80848109200444	1.85418324576903	2.37018028595242	1.41376060629237	0	1.38188561121774	0	1.1774793798721	1.5951915298159	0	0	1.88219852107302	1.60529084532146	2.1446012183338	0.872041390770809	0	1.84313693515726	1.39910484519709	0	1.47615728415992	0	0	1.48165090626768	1.67845983215565	0	2.19120286332434	1.5951915298159	0	0	0	0	1.56071546606206	0	1.45088903063211	1.96001316875166	1.3627638637097	0	1.87655600588813	2.33770652829823	2.01347435610029	0	0	0	0	2.0977679365713
Prkce	0	0	0	0	3.06361020076055	3.90153458207803	3.55385047398893	0	0	0	0	0	0	0	0	0	0	0	0.872041390770809	0	0	0	2.11648862170071	1.47615728415992	0	0	0	0	1.62858967852153	0	1.5951915298159	0	0	0	0	1.56071546606206	0	0	0	0	0	0	0	0	2.33013285941581	1.54167716546894	0	0	0
Epas1	0	0	2.66881159069705	1.85623049348733	1.48178229328473	1.85418324576903	2.37018028595242	0	0	0	0	1.1774793798721	0	0	0	0	0	0	0.872041390770809	0	0	0	0	0	0	0	1.48165090626768	0	0	0	0	0	0	0	0	0	0	0	0	0	0	0	0	0	0	0	0	0	0
Chst9	0	0	0	0	0	0	0	0	0	0	0	0	0	0	0	0	1.60529084532146	0	0	0	0	0	0	0	0	0	0	0	0	0	0	0	0	0	0	0	0	0	0	0	0	0	0	0	0	0	0	0	0
Tnfaip8	0	2.18103416648712	0	1.85623049348733	0.993396610650691	2.20604334445495	0	0	1.55010236289611	0	0	1.1774793798721	0	0	0	0	1.60529084532146	0	0	1.45088903063211	0	0	0	0	0	0	1.48165090626768	1.15645633846224	0	0	0	0	0	0	0	0	0	1.45088903063211	1.39864534214568	1.3627638637097	0	0	0	1.15155178662365	0	0	0	0	0
Nedd4l	1.91304334097496	0	0	0	0.993396610650691	2.20604334445495	1.76638362943403	0	0	0	0	0	0	0	0	0	0	0	0.872041390770809	2.01940121907183	1.29696043990145	1.39910484519709	0	0	1.77284598709209	0	0	0	0	0	2.18138266187056	0	0	0	0	0	1.7022571258035	0	1.39864534214568	0	2.16893192398403	1.32587712930109	1.41564721758502	0	0	0	0	0	0
Tcf4	1.91304334097496	2.18103416648712	0	0	2.05432427253536	4.57068245067151	2.37018028595242	1.97723927763111	0	0	0	1.1774793798721	0	3.04833996478759	0	0	0	0	1.64390993462428	2.01940121907183	0	1.39910484519709	0	1.47615728415992	1.77284598709209	0	0	1.15645633846224	1.62858967852153	1.60402000419271	0	1.33302966610564	1.47824443665154	0	0	1.56071546606206	1.17654765961443	0	1.39864534214568	1.3627638637097	1.58401081863252	1.87655600588813	0	1.67263712047957	0	1.54167716546894	0	0	1.52038403247398
Ctif	0	0	0	0	1.48178229328473	1.61737829430071	1.76638362943403	0	0	0	0	0	0	0	0	0	0	1.56220326605152	0	0	0	0	0	1.47615728415992	0	0	0	0	0	0	0	0	1.47824443665154	0	0	0	0	1.45088903063211	0	0	0	0	1.41564721758502	0	0	0	0	0	0
Setbp1	0	0	0	0	0.993396610650691	1.85418324576903	0	1.97723927763111	0	0	0	0	1.5951915298159	0	0	0	0	0	0	1.45088903063211	0	0	0	0	0	0	0	0	0	0	0	0	0	0	0	0	0	0	0	1.3627638637097	0	0	0	0	1.97216318304985	1.54167716546894	1.4935867112408	0	0
Malat1	4.07306509435617	4.84172226158803	6.23650092031526	5.51897835721556	4.88227234243054	4.6764016846302	5.16813908228408	4.44273910357788	3.5382766675698	3.68314428007873	4.36334547132513	3.77683191255598	4.27286606796782	6.09304382650846	5.76379647057624	4.21678554413402	4.28534414480086	4.17559272472405	3.65268963376651	4.62765639976756	3.8886907112042	3.90851977526972	3.71748252236686	3.80419865726633	5.56084328423964	4.10936180521735	5.21825099884169	3.93395928549247	4.19790706750751	3.36075330097929	4.09332898448407	4.21980744506162	3.55112210242235	4.14634714275526	3.95553596909739	3.55134133517787	3.96257623240392	3.91209487478276	3.70490617752667	3.4035202630783	3.57990701627731	3.81215377636766	3.92998915237272	4.12012165256349	4.54109098815251	5.36597773110455	4.54576029569975	5.73304229276206	4.12321840598561
Gnaq	2.90804882529951	0	2.66881159069705	2.84483403817121	2.79138102373777	2.842548448194	1.76638362943403	1.97723927763111	2.76303131715074	2.93886679412076	2.7143259804111	0	2.54849309702186	2.40153959170054	0	0	0	2.1446012183338	1.3306698310669	0	2.19438517880036	2.58069294633775	2.95776232952398	3.05666665395977	2.75128570305625	0	1.48165090626768	0	1.62858967852153	2.55869531334854	2.81643168929903	0	1.47824443665154	0	1.90084099868064	2.50851588838906	2.29984468830504	2.01940121907183	2.78800375942472	1.9189724933235	0	1.32587712930109	1.41564721758502	2.26720557616219	2.59319359378104	1.54167716546894	2.43002059530923	2.07917908596773	2.0977679365713
Apba1	0	0	0	0	1.48178229328473	2.34433528574587	0	0	0	0	0	0	0	0	0	0	0	0	0	0	0	0	0	0	1.77284598709209	0	0	0	0	0	0	0	0	0	0	0	0	0	0	0	0	0	0	0	0	0	0	0	0
Dock8	1.91304334097496	0	0	1.85623049348733	0.993396610650691	1.30650411282277	1.76638362943403	0	0	0	0	0	0	0	0	0	0	0	0.872041390770809	0	0	0	0	0	0	0	0	0	0	0	0	0	0	1.53879714164537	0	1.56071546606206	0	0	1.39864534214568	1.3627638637097	1.58401081863252	0	0	0	0	0	0	0	0
Sgms1	0	0	0	0	2.41612326882996	1.85418324576903	0	0	0	0	0	0	0	0	0	0	0	0	0.872041390770809	0	0	0	0	0	0	1.72424673944707	1.48165090626768	0	1.62858967852153	1.60402000419271	0	1.33302966610564	0	0	0	1.56071546606206	1.7022571258035	1.45088903063211	0	0	1.58401081863252	1.32587712930109	0	1.15155178662365	2.33013285941581	1.54167716546894	1.4935867112408	0	0
Pdlim1	2.52950901854903	0	0	2.46802631430948	2.05432427253536	1.30650411282277	1.76638362943403	0	0	0	0	0	0	0	2.56365802305712	0	0	1.56220326605152	0	0	1.29696043990145	1.39910484519709	1.53707526384671	2.04797595982601	0	0	0	1.15645633846224	0	1.60402000419271	0	0	0	1.53879714164537	0	2.14293903016024	0	0	0	0	0	1.32587712930109	0	0	0	0	0	0	0
Sorbs1	1.91304334097496	0	0	3.33212737051381	2.98083698700294	1.61737829430071	2.74399514267271	1.97723927763111	1.55010236289611	0	0	0	1.5951915298159	2.40153959170054	0	2.49616449684084	0	2.1446012183338	1.3306698310669	1.45088903063211	1.29696043990145	0	2.11648862170071	0	1.77284598709209	0	2.05417604315834	0	2.21848185153062	1.60402000419271	0	0	1.47824443665154	0	2.51632773563111	0	1.7022571258035	0	0	0	0	1.87655600588813	0	2.01347435610029	0	1.54167716546894	2.69544810697013	0	1.52038403247398
Entpd1	0	2.18103416648712	0	0	0	0	0	0	0	0	0	0	0	0	0	0	0	0	0	0	0	0	0	0	0	0	0	0	0	0	0	0	0	1.53879714164537	0	0	0	0	0	0	0	0	0	0	0	0	0	0	0
Afap1l2	1.91304334097496	0	0	2.46802631430948	2.25149761424116	2.842548448194	0	2.33545520646924	2.13107349438063	1.9408699880354	0	2.3010565219101	3.02753929531507	0	1.94471110814427	0	0	3.16192049011584	0.872041390770809	2.37961268000602	2.19438517880036	0	0	2.40949066696638	0	0	2.41596842294391	1.67845983215565	0	2.19120286332434	1.5951915298159	1.33302966610564	1.47824443665154	1.53879714164537	1.90084099868064	1.56071546606206	0	0	0	1.3627638637097	2.16893192398403	0	1.41564721758502	2.01347435610029	1.40930321104762	2.12164341369804	0	2.70777024589321	1.52038403247398
[truncated: 2,961 more columns]
