# Supplementary material for: Single nuclei RNA-seq of mouse placental labyrinth development
Source: eLife. 2020 Nov 3;9:e60266. doi: 10.7554/eLife.60266 (PMC7669270; doi:10.7554/eLife.60266)
Supplement: Figure 3—figure supplement 1—source data 1. [file elife-60266-fig3-figsupp1-data1.xlsx]

## Sheet: STGC_Enriched_E9.5_GO
	ID	Description	GeneRatio	BgRatio	pvalue	p.adjust	qvalue	geneID	Count
GO:0140014	GO:0140014	mitotic nuclear division	22/224	257/23210	8.15823e-15	2.17254e-11	1.82916e-11	Mad1l1/Pds5b/Smc4/Mki67/Cit/Clasp2/Cdkn1c/Kif20b/Eps8/Slf1/Kif11/Smc2/Gen1/Incenp/Spag5/Cenpe/Kif4/Smc3/Cdk5rap2/Tpx2/Kifc1/Kpnb1	22
GO:0000280	GO:0000280	nuclear division	26/224	409/23210	3.27214e-14	4.35685e-11	3.66824e-11	Mad1l1/Pds5b/Smc4/Mki67/Cit/Top2a/Topbp1/Clasp2/Eif4g3/Cdkn1c/Kif20b/Eps8/Slf1/Kif11/Smc2/Gen1/Incenp/Fanca/Spag5/Cenpe/Kif4/Smc3/Cdk5rap2/Tpx2/Kifc1/Kpnb1	26
GO:0048285	GO:0048285	organelle fission	26/224	456/23210	4.0701e-13	3.61289e-10	3.04187e-10	Mad1l1/Pds5b/Smc4/Mki67/Cit/Top2a/Topbp1/Clasp2/Eif4g3/Cdkn1c/Kif20b/Eps8/Slf1/Kif11/Smc2/Gen1/Incenp/Fanca/Spag5/Cenpe/Kif4/Smc3/Cdk5rap2/Tpx2/Kifc1/Kpnb1	26
GO:0007346	GO:0007346	regulation of mitotic cell cycle	26/224	493/23210	2.40011e-12	1.59787e-09	1.34532e-09	Mad1l1/Mki67/Lmnb1/Cit/Top2a/Topbp1/Zwilch/Brca1/Cdkn1c/Kif20b/Slf1/Kif11/Dlg1/Clspn/Gen1/Cdk1/Incenp/E2f7/Cenpf/Blm/Cenpe/Smc3/Cdk5rap2/Tpx2/Dtl/Kntc1	26
GO:0006281	GO:0006281	DNA repair	25/224	464/23210	4.09745e-12	2.1823e-09	1.83738e-09	Pds5b/Smc4/Mms22l/Pola1/Nsd2/Polq/Topbp1/Psmd14/Npm1/Rif1/Brca1/Slf1/Clspn/Smc2/Gen1/Psme4/Pole/Fanca/Blm/Smc3/Wdhd1/Dtl/Exo1/Parpbp/Uhrf1	25
GO:0007059	GO:0007059	chromosome segregation	21/224	317/23210	4.98049e-12	2.21051e-09	1.86113e-09	Mad1l1/Pds5b/Smc4/Mki67/Cit/Top2a/Brca1/Slf1/Smc2/Gen1/Incenp/Cdca2/Spag5/Cenpf/Cenpe/Kif4/Smc3/Cdk5rap2/Kpnb1/Knl1/Tlk2	21
GO:0000819	GO:0000819	sister chromatid segregation	15/224	180/23210	2.54942e-10	9.69873e-08	8.16582e-08	Mad1l1/Pds5b/Smc4/Cit/Top2a/Slf1/Smc2/Gen1/Incenp/Spag5/Cenpe/Kif4/Smc3/Cdk5rap2/Kpnb1	15
GO:0098813	GO:0098813	nuclear chromosome segregation	17/224	258/23210	6.23819e-10	2.07654e-07	1.74834e-07	Mad1l1/Pds5b/Smc4/Cit/Top2a/Slf1/Smc2/Gen1/Incenp/Spag5/Cenpf/Cenpe/Kif4/Smc3/Cdk5rap2/Kpnb1/Knl1	17
GO:0044770	GO:0044770	cell cycle phase transition	20/224	394/23210	1.79744e-09	4.54384e-07	3.82567e-07	Mad1l1/Lmnb1/Cit/Topbp1/Clasp2/Npm1/Brca1/Cdkn1c/Eps8/Clspn/Gen1/Cdk1/Pole/E2f7/Cenpf/Blm/Cenpe/Usp37/Cdk5rap2/Dtl	20
GO:0000070	GO:0000070	mitotic sister chromatid segregation	13/224	146/23210	1.82137e-09	4.54384e-07	3.82567e-07	Mad1l1/Pds5b/Smc4/Cit/Slf1/Smc2/Gen1/Incenp/Spag5/Cenpe/Kif4/Cdk5rap2/Kpnb1	13
GO:0006260	GO:0006260	DNA replication	16/224	243/23210	2.04475e-09	4.54384e-07	3.82567e-07	Mms22l/Pola1/Polq/Faf1/Npm1/Baz1a/Gen1/Cdk1/Pole/E2f7/Blm/Smc3/Usp37/Wdhd1/Pola2/Dtl	16
GO:0044772	GO:0044772	mitotic cell cycle phase transition	19/224	356/23210	2.04754e-09	4.54384e-07	3.82567e-07	Mad1l1/Lmnb1/Cit/Topbp1/Clasp2/Brca1/Cdkn1c/Eps8/Clspn/Gen1/Cdk1/Pole/E2f7/Cenpf/Blm/Cenpe/Usp37/Cdk5rap2/Dtl	19
GO:0007093	GO:0007093	mitotic cell cycle checkpoint	12/224	130/23210	5.14976e-09	1.05491e-06	8.88177e-07	Mad1l1/Top2a/Topbp1/Zwilch/Brca1/Clspn/Gen1/Cdk1/Blm/Cenpe/Cdk5rap2/Kntc1	12
GO:0006261	GO:0006261	DNA-dependent DNA replication	12/224	135/23210	7.921e-09	1.50669e-06	1.26855e-06	Mms22l/Pola1/Polq/Npm1/Baz1a/Gen1/Pole/E2f7/Blm/Smc3/Wdhd1/Pola2	12
GO:0033044	GO:0033044	regulation of chromosome organization	18/224	356/23210	1.27908e-08	2.27079e-06	1.91188e-06	Mad1l1/Mki67/Cit/Top2a/Ogt/Atad2/Rif1/Brca1/Slf1/Bcor/Asxl2/Gen1/Prkd1/Cenpe/Cdk5rap2/Wdhd1/Setd7/Tlk2	18
GO:0045786	GO:0045786	negative regulation of cell cycle	20/224	452/23210	1.82698e-08	3.04077e-06	2.56017e-06	Mad1l1/Top2a/Topbp1/Zwilch/Npm1/Brca1/Ppp1r13b/Cdkn1c/Dlg1/Clspn/Gen1/Cdk1/E2f7/Blm/Cenpe/Smc3/Cdk5rap2/Dtl/Kntc1/Kifc1	20
GO:0000075	GO:0000075	cell cycle checkpoint	13/224	178/23210	2.02086e-08	3.16562e-06	2.66528e-06	Mad1l1/Top2a/Topbp1/Zwilch/Brca1/Clspn/Gen1/Cdk1/Blm/Cenpe/Cdk5rap2/Dtl/Kntc1	13
GO:0010948	GO:0010948	negative regulation of cell cycle process	14/224	226/23210	4.60332e-08	6.81035e-06	5.73396e-06	Mad1l1/Topbp1/Npm1/Brca1/Clspn/Gen1/Cdk1/E2f7/Blm/Cenpe/Smc3/Cdk5rap2/Dtl/Kifc1	14
GO:0045930	GO:0045930	negative regulation of mitotic cell cycle	14/224	233/23210	6.73321e-08	9.43712e-06	7.94556e-06	Mad1l1/Top2a/Topbp1/Zwilch/Brca1/Dlg1/Clspn/Gen1/Cdk1/E2f7/Blm/Cenpe/Cdk5rap2/Kntc1	14
GO:0010639	GO:0010639	negative regulation of organelle organization	18/224	403/23210	8.42258e-08	1.12147e-05	9.44215e-06	Mid1/Mad1l1/Plekhh2/Tpm1/Top2a/Nav3/Clasp2/Npm1/Carmil1/Atad2/Brca1/Eps8/Bcor/Gen1/Cenpe/Evl/Cdk5rap2/Kifc1	18
GO:0090068	GO:0090068	positive regulation of cell cycle process	14/224	249/23210	1.52907e-07	1.93901e-05	1.63254e-05	Lmnb1/Cit/Npm1/Brca1/Cspp1/Eif4g3/Kif20b/Slf1/Gen1/Cdk1/E2f7/Spag5/Cenpe/Dtl	14
GO:1901987	GO:1901987	regulation of cell cycle phase transition	15/224	290/23210	1.61545e-07	1.95542e-05	1.64636e-05	Mad1l1/Lmnb1/Topbp1/Npm1/Brca1/Cdkn1c/Clspn/Gen1/Cdk1/E2f7/Cenpf/Blm/Cenpe/Cdk5rap2/Dtl	15
GO:1901990	GO:1901990	regulation of mitotic cell cycle phase transition	14/224	259/23210	2.47379e-07	2.86422e-05	2.41152e-05	Mad1l1/Lmnb1/Topbp1/Brca1/Cdkn1c/Clspn/Gen1/Cdk1/E2f7/Cenpf/Blm/Cenpe/Cdk5rap2/Dtl	14
GO:1902749	GO:1902749	regulation of cell cycle G2/M phase transition	9/224	94/23210	3.23159e-07	3.58572e-05	3.01899e-05	Lmnb1/Topbp1/Npm1/Brca1/Clspn/Cdk1/Cenpf/Blm/Dtl	9
GO:0051494	GO:0051494	negative regulation of cytoskeleton organization	11/224	155/23210	3.38917e-07	3.61014e-05	3.03955e-05	Mid1/Plekhh2/Tpm1/Nav3/Clasp2/Npm1/Carmil1/Eps8/Evl/Cdk5rap2/Kifc1	11
GO:0044839	GO:0044839	cell cycle G2/M phase transition	10/224	127/23210	4.48174e-07	4.43337e-05	3.73266e-05	Lmnb1/Cit/Topbp1/Npm1/Brca1/Clspn/Cdk1/Cenpf/Blm/Dtl	10
GO:0051783	GO:0051783	regulation of nuclear division	12/224	195/23210	4.60918e-07	4.43337e-05	3.73266e-05	Mad1l1/Mki67/Cit/Eif4g3/Cdkn1c/Kif20b/Slf1/Kif11/Gen1/Cenpe/Smc3/Cdk5rap2	12
GO:1901988	GO:1901988	negative regulation of cell cycle phase transition	11/224	160/23210	4.66145e-07	4.43337e-05	3.73266e-05	Mad1l1/Topbp1/Brca1/Clspn/Gen1/Cdk1/E2f7/Blm/Cenpe/Cdk5rap2/Dtl	11
GO:0031023	GO:0031023	microtubule organizing center organization	10/224	130/23210	5.56744e-07	4.81877e-05	4.05715e-05	Clasp2/Npm1/Brca1/Ppp1r12a/Kif11/Pcm1/Gen1/Cdk5rap2/Kifc1/Xpo1	10
GO:0007088	GO:0007088	regulation of mitotic nuclear division	11/224	163/23210	5.61265e-07	4.81877e-05	4.05715e-05	Mad1l1/Mki67/Cit/Cdkn1c/Kif20b/Slf1/Kif11/Gen1/Cenpe/Smc3/Cdk5rap2	11
GO:0070507	GO:0070507	regulation of microtubule cytoskeleton organization	12/224	199/23210	5.72598e-07	4.81877e-05	4.05715e-05	Mid1/Nav3/Clasp2/Npm1/Kif11/Gen1/Spag5/Smc3/Cdk5rap2/Tpx2/Kifc1/Xpo1	12
GO:1901880	GO:1901880	negative regulation of protein depolymerization	8/224	74/23210	5.79049e-07	4.81877e-05	4.05715e-05	Mid1/Plekhh2/Tpm1/Nav3/Clasp2/Carmil1/Eps8/Evl	8
GO:0006323	GO:0006323	DNA packaging	11/224	169/23210	8.04185e-07	6.48953e-05	5.46384e-05	Smc4/Cenpp/Top2a/Npm1/Kat6b/Hells/Smc2/Hat1/Cdk1/Psme4/Nap1l1	11
GO:0010389	GO:0010389	regulation of G2/M transition of mitotic cell cycle	8/224	78/23210	8.71523e-07	6.69287e-05	5.63504e-05	Lmnb1/Topbp1/Brca1/Clspn/Cdk1/Cenpf/Blm/Dtl	8
GO:0051656	GO:0051656	establishment of organelle localization	18/224	473/23210	8.79648e-07	6.69287e-05	5.63504e-05	Mad1l1/Erc1/Braf/Clasp2/Npm1/Dlg1/Pcm1/Kif1b/Spag5/Cenpf/Cenpe/Cdk5rap2/Cdh3/Atp2a2/Kifc1/Syne1/Xpo1/Kpnb1	18
GO:0071103	GO:0071103	DNA conformation change	12/224	210/23210	1.01332e-06	7.49576e-05	6.31103e-05	Smc4/Cenpp/Top2a/Npm1/Kat6b/Hells/Smc2/Hat1/Cdk1/Psme4/Nap1l1/Blm	12
GO:0000086	GO:0000086	G2/M transition of mitotic cell cycle	9/224	110/23210	1.23458e-06	8.88563e-05	7.48123e-05	Lmnb1/Cit/Topbp1/Brca1/Clspn/Cdk1/Cenpf/Blm/Dtl	9
GO:1901991	GO:1901991	negative regulation of mitotic cell cycle phase transition	10/224	143/23210	1.33845e-06	9.3797e-05	7.89721e-05	Mad1l1/Topbp1/Brca1/Clspn/Gen1/Cdk1/E2f7/Blm/Cenpe/Cdk5rap2	10
GO:0043242	GO:0043242	negative regulation of protein complex disassembly	8/224	83/23210	1.40674e-06	9.60554e-05	8.08735e-05	Mid1/Plekhh2/Tpm1/Nav3/Clasp2/Carmil1/Eps8/Evl	8
GO:1901879	GO:1901879	regulation of protein depolymerization	8/224	87/23210	2.01627e-06	0.000134233	0.000113017	Mid1/Plekhh2/Tpm1/Nav3/Clasp2/Carmil1/Eps8/Evl	8
GO:0007098	GO:0007098	centrosome cycle	9/224	122/23210	2.93445e-06	0.000190596	0.000160472	Npm1/Brca1/Ppp1r12a/Kif11/Pcm1/Gen1/Cdk5rap2/Kifc1/Xpo1	9
GO:0000910	GO:0000910	cytokinesis	10/224	157/23210	3.11917e-06	0.00019777	0.000166512	Sept11/Cit/Klhl13/Cspp1/Kif20b/Anln/Incenp/E2f7/Birc6/Kif4	10
GO:0032886	GO:0032886	regulation of microtubule-based process	12/224	235/23210	3.27596e-06	0.000202881	0.000170815	Mid1/Nav3/Clasp2/Npm1/Kif11/Gen1/Spag5/Smc3/Cdk5rap2/Tpx2/Kifc1/Xpo1	12
GO:0006310	GO:0006310	DNA recombination	13/224	280/23210	3.63301e-06	0.00021988	0.000185127	Mms22l/Nsd2/Polq/Top2a/Topbp1/Psmd14/Rif1/Brca1/Gen1/Hspd1/Blm/Exo1/Parpbp	13
GO:0043414	GO:0043414	macromolecule methylation	13/224	286/23210	4.57667e-06	0.000270837	0.000228031	Kcnq1ot1/Thada/Nsd2/Ogt/Ftx/Rif1/Brca1/Hells/Bcor/Asxl2/Ehmt1/Grhl2/Setd7	13
GO:0007051	GO:0007051	spindle organization	10/224	165/23210	4.86496e-06	0.000280799	0.000236418	Clasp2/Kif11/Dlg1/Spag5/Cenpe/Kif4/Smc3/Tpx2/Kifc1/Kpnb1	10
GO:1902850	GO:1902850	microtubule cytoskeleton organization involved in mitosis	9/224	130/23210	4.95589e-06	0.000280799	0.000236418	Clasp2/Kif11/Cenpe/Kif4/Smc3/Cdk5rap2/Tpx2/Kifc1/Kpnb1	9
GO:0051052	GO:0051052	regulation of DNA metabolic process	16/224	440/23210	6.44175e-06	0.000357383	0.000300898	Kcnq1ot1/Nsd2/Polq/Faf1/Ftx/Npm1/Rif1/Brca1/Slf1/Cdk1/E2f7/Grhl2/Blm/Smc3/Usp37/Parpbp	16
GO:0051983	GO:0051983	regulation of chromosome segregation	8/224	104/23210	7.72381e-06	0.000419765	0.00035342	Mad1l1/Mki67/Cit/Slf1/Gen1/Spag5/Cenpe/Cdk5rap2	8
GO:0045787	GO:0045787	positive regulation of cell cycle	14/224	349/23210	8.24269e-06	0.000432979	0.000364545	Lmnb1/Cit/Npm1/Brca1/Cspp1/Eif4g3/Kif20b/Slf1/Gen1/Cdk1/E2f7/Spag5/Cenpe/Dtl	14
GO:0007052	GO:0007052	mitotic spindle organization	8/224	105/23210	8.29212e-06	0.000432979	0.000364545	Clasp2/Kif11/Cenpe/Kif4/Smc3/Tpx2/Kifc1/Kpnb1	8
GO:0006302	GO:0006302	double-strand break repair	11/224	220/23210	1.03039e-05	0.00052768	0.000444278	Mms22l/Pola1/Nsd2/Polq/Psmd14/Rif1/Brca1/Slf1/Gen1/Blm/Parpbp	11
GO:1902750	GO:1902750	negative regulation of cell cycle G2/M phase transition	6/224	52/23210	1.06196e-05	0.000533587	0.000449252	Topbp1/Brca1/Clspn/Cdk1/Blm/Dtl	6
GO:0034968	GO:0034968	histone lysine methylation	8/224	109/23210	1.09318e-05	0.000536811	0.000451967	Nsd2/Ogt/Rif1/Brca1/Bcor/Asxl2/Ehmt1/Setd7	8
GO:0044818	GO:0044818	mitotic G2/M transition checkpoint	5/224	31/23210	1.1087e-05	0.000536811	0.000451967	Topbp1/Brca1/Clspn/Cdk1/Blm	5
GO:0032465	GO:0032465	regulation of cytokinesis	7/224	79/23210	1.14146e-05	0.000542804	0.000457012	Cit/Klhl13/Cspp1/Kif20b/Incenp/E2f7/Birc6	7
GO:0031572	GO:0031572	G2 DNA damage checkpoint	5/224	32/23210	1.30373e-05	0.000609094	0.000512825	Brca1/Clspn/Cdk1/Blm/Dtl	5
GO:0043244	GO:0043244	regulation of protein complex disassembly	8/224	115/23210	1.61984e-05	0.00074373	0.000626181	Mid1/Plekhh2/Tpm1/Nav3/Clasp2/Carmil1/Eps8/Evl	8
GO:0051261	GO:0051261	protein depolymerization	8/224	116/23210	1.72554e-05	0.000778835	0.000655738	Mid1/Plekhh2/Tpm1/Nav3/Clasp2/Carmil1/Eps8/Evl	8
GO:0090307	GO:0090307	mitotic spindle assembly	6/224	57/23210	1.8184e-05	0.000807067	0.000679508	Kif11/Kif4/Smc3/Tpx2/Kifc1/Kpnb1	6
GO:0046605	GO:0046605	regulation of centrosome cycle	6/224	58/23210	2.012e-05	0.000878353	0.000739527	Npm1/Kif11/Gen1/Cdk5rap2/Kifc1/Xpo1	6
GO:0040029	GO:0040029	regulation of gene expression, epigenetic	12/224	284/23210	2.21115e-05	0.000949723	0.000799617	Xist/Kcnq1ot1/Tsix/Kcnq1/Ftx/Atad2/Rif1/Brca1/Hells/Hat1/Drosha/Elavl1	12
GO:1902275	GO:1902275	regulation of chromatin organization	10/224	197/23210	2.29412e-05	0.000969722	0.000816455	Mki67/Ogt/Atad2/Rif1/Brca1/Bcor/Asxl2/Prkd1/Setd7/Tlk2	10
GO:0018022	GO:0018022	peptidyl-lysine methylation	8/224	122/23210	2.48915e-05	0.00103572	0.000872021	Nsd2/Ogt/Rif1/Brca1/Bcor/Asxl2/Ehmt1/Setd7	8
GO:0032259	GO:0032259	methylation	13/224	338/23210	2.70132e-05	0.00109482	0.000921781	Kcnq1ot1/Thada/Nsd2/Ogt/Ftx/Rif1/Brca1/Hells/Bcor/Asxl2/Ehmt1/Grhl2/Setd7	13
GO:0071514	GO:0071514	genetic imprinting	5/224	37/23210	2.71341e-05	0.00109482	0.000921781	Xist/Kcnq1ot1/Kcnq1/Brca1/Cdkn1c	5
GO:0000724	GO:0000724	double-strand break repair via homologous recombination	8/224	127/23210	3.3251e-05	0.00130217	0.00109636	Mms22l/Polq/Psmd14/Rif1/Brca1/Gen1/Blm/Parpbp	8
GO:0000725	GO:0000725	recombinational repair	8/224	127/23210	3.3251e-05	0.00130217	0.00109636	Mms22l/Polq/Psmd14/Rif1/Brca1/Gen1/Blm/Parpbp	8
GO:0006349	GO:0006349	regulation of gene expression by genetic imprinting	4/224	21/23210	4.44319e-05	0.00171481	0.00144378	Xist/Kcnq1ot1/Kcnq1/Brca1	4
GO:0010972	GO:0010972	negative regulation of G2/M transition of mitotic cell cycle	5/224	41/23210	4.52083e-05	0.00171985	0.00144803	Topbp1/Brca1/Clspn/Cdk1/Blm	5
GO:0051298	GO:0051298	centrosome duplication	6/224	67/23210	4.61523e-05	0.00173104	0.00145744	Npm1/Brca1/Gen1/Cdk5rap2/Kifc1/Xpo1	6
GO:0030835	GO:0030835	negative regulation of actin filament depolymerization	5/224	42/23210	5.09168e-05	0.00188322	0.00158557	Plekhh2/Tpm1/Carmil1/Eps8/Evl	5
GO:0043624	GO:0043624	cellular protein complex disassembly	8/224	136/23210	5.42126e-05	0.00191168	0.00160953	Mid1/Plekhh2/Tpm1/Nav3/Clasp2/Carmil1/Eps8/Evl	8
GO:0006305	GO:0006305	DNA alkylation	6/224	69/23210	5.45579e-05	0.00191168	0.00160953	Kcnq1ot1/Ftx/Brca1/Hells/Ehmt1/Grhl2	6
GO:0006306	GO:0006306	DNA methylation	6/224	69/23210	5.45579e-05	0.00191168	0.00160953	Kcnq1ot1/Ftx/Brca1/Hells/Ehmt1/Grhl2	6
GO:0033047	GO:0033047	regulation of mitotic sister chromatid segregation	6/224	69/23210	5.45579e-05	0.00191168	0.00160953	Mad1l1/Cit/Slf1/Gen1/Cenpe/Cdk5rap2	6
GO:0010824	GO:0010824	regulation of centrosome duplication	5/224	43/23210	5.71666e-05	0.00197707	0.00166459	Npm1/Gen1/Cdk5rap2/Kifc1/Xpo1	5
GO:0016571	GO:0016571	histone methylation	8/224	138/23210	6.01202e-05	0.00203239	0.00171116	Nsd2/Ogt/Rif1/Brca1/Bcor/Asxl2/Ehmt1/Setd7	8
GO:0051225	GO:0051225	spindle assembly	7/224	102/23210	6.02925e-05	0.00203239	0.00171116	Kif11/Spag5/Kif4/Smc3/Tpx2/Kifc1/Kpnb1	7
GO:0031060	GO:0031060	regulation of histone methylation	6/224	73/23210	7.50308e-05	0.00246675	0.00207688	Ogt/Rif1/Brca1/Bcor/Asxl2/Setd7	6
GO:2000779	GO:2000779	regulation of double-strand break repair	6/224	73/23210	7.50308e-05	0.00246675	0.00207688	Nsd2/Polq/Rif1/Slf1/Blm/Parpbp	6
GO:0009048	GO:0009048	dosage compensation by inactivation of X chromosome	4/224	24/23210	7.7114e-05	0.00250432	0.00210851	Xist/Tsix/Ftx/Brca1	4
GO:0006275	GO:0006275	regulation of DNA replication	7/224	107/23210	8.1742e-05	0.00262264	0.00220812	Faf1/Npm1/Cdk1/E2f7/Blm/Smc3/Usp37	7
GO:2001251	GO:2001251	negative regulation of chromosome organization	8/224	146/23210	8.93804e-05	0.00283357	0.00238572	Mad1l1/Top2a/Atad2/Brca1/Bcor/Gen1/Cenpe/Cdk5rap2	8
GO:1902904	GO:1902904	negative regulation of supramolecular fiber organization	8/224	147/23210	9.37508e-05	0.00293716	0.00247293	Mid1/Plekhh2/Tpm1/Nav3/Clasp2/Carmil1/Eps8/Evl	8
GO:0031570	GO:0031570	DNA integrity checkpoint	7/224	111/23210	0.000103061	0.00319131	0.00268691	Top2a/Topbp1/Brca1/Clspn/Cdk1/Blm/Dtl	7
GO:0006730	GO:0006730	one-carbon metabolic process	4/224	26/23210	0.000106864	0.00323385	0.00272273	Mthfd1l/Mat2a/Tyms/Mthfd1	4
GO:0007549	GO:0007549	dosage compensation	4/224	26/23210	0.000106864	0.00323385	0.00272273	Xist/Tsix/Ftx/Brca1	4
GO:0001892	GO:0001892	embryonic placenta development	7/224	112/23210	0.000109042	0.00326269	0.00274701	Xist/Plac1/Cdkn1c/E2f7/Birc6/Grhl2/Krt19	7
GO:0016569	GO:0016569	covalent chromatin modification	14/224	444/23210	0.000113642	0.00336254	0.00283108	Nsd2/Ogt/Rif1/Kat6b/Brca1/Hells/Bcor/Asxl2/Hat1/Ehmt1/Prkd1/Usp15/Setd7/Uhrf1	14
GO:0006303	GO:0006303	double-strand break repair via nonhomologous end joining	5/224	50/23210	0.000119116	0.00348579	0.00293485	Pola1/Nsd2/Polq/Psmd14/Rif1	5
GO:0006913	GO:0006913	nucleocytoplasmic transport	11/224	289/23210	0.000123449	0.00353489	0.00297619	Ipo5/Xpo7/Ranbp17/Npm1/Ppp1r12a/Rbm26/Prkd1/Cse1l/Pola2/Xpo1/Kpnb1	11
GO:0051169	GO:0051169	nuclear transport	11/224	289/23210	0.000123449	0.00353489	0.00297619	Ipo5/Xpo7/Ranbp17/Npm1/Ppp1r12a/Rbm26/Prkd1/Cse1l/Pola2/Xpo1/Kpnb1	11
GO:0030834	GO:0030834	regulation of actin filament depolymerization	5/224	51/23210	0.000131034	0.00371217	0.00312545	Plekhh2/Tpm1/Carmil1/Eps8/Evl	5
GO:0051302	GO:0051302	regulation of cell division	8/224	156/23210	0.000141662	0.00389484	0.00327925	Cit/Klhl13/Cspp1/Kif20b/Incenp/E2f7/Birc6/Blm	8
GO:0051054	GO:0051054	positive regulation of DNA metabolic process	10/224	245/23210	0.000142448	0.00389484	0.00327925	Nsd2/Faf1/Npm1/Rif1/Brca1/Slf1/Cdk1/E2f7/Grhl2/Blm	10
GO:0006282	GO:0006282	regulation of DNA repair	7/224	117/23210	0.000143332	0.00389484	0.00327925	Nsd2/Polq/Rif1/Brca1/Slf1/Blm/Parpbp	7
GO:0014020	GO:0014020	primary neural tube formation	7/224	117/23210	0.000143332	0.00389484	0.00327925	Mthfd1l/Enah/Kif20b/Mthfd1/Grhl2/Luzp1/Gatad2a	7
GO:0007015	GO:0007015	actin filament organization	13/224	400/23210	0.000148283	0.00398865	0.00335824	Diaph3/Plekhh2/Cit/Tpm1/Braf/Enah/Clasp2/Carmil1/Eps8/Dlg1/Tpm4/Evl/Ppargc1b	13
GO:0033045	GO:0033045	regulation of sister chromatid segregation	6/224	83/23210	0.000153568	0.00403298	0.00339555	Mad1l1/Cit/Slf1/Gen1/Cenpe/Cdk5rap2	6
GO:0008154	GO:0008154	actin polymerization or depolymerization	9/224	201/23210	0.000153637	0.00403298	0.00339555	Diaph3/Plekhh2/Cit/Tpm1/Enah/Carmil1/Eps8/Dlg1/Evl	9
GO:1902903	GO:1902903	regulation of supramolecular fiber organization	12/224	348/23210	0.000154474	0.00403298	0.00339555	Mid1/Plekhh2/Cit/Tpm1/Nav3/Braf/Clasp2/Carmil1/Eps8/Dlg1/Evl/Cdk5rap2	12
GO:0044728	GO:0044728	DNA methylation or demethylation	6/224	84/23210	0.000164064	0.00424178	0.00357135	Kcnq1ot1/Ftx/Brca1/Hells/Ehmt1/Grhl2	6
GO:0010826	GO:0010826	negative regulation of centrosome duplication	3/224	12/23210	0.000182975	0.00468523	0.00394471	Npm1/Cdk5rap2/Kifc1	3
GO:0030042	GO:0030042	actin filament depolymerization	5/224	55/23210	0.000188074	0.00473012	0.00398251	Plekhh2/Tpm1/Carmil1/Eps8/Evl	5
GO:0008608	GO:0008608	attachment of spindle microtubules to kinetochore	4/224	30/23210	0.000190057	0.00473012	0.00398251	Mad1l1/Spag5/Cenpe/Knl1	4
GO:1902751	GO:1902751	positive regulation of cell cycle G2/M phase transition	4/224	30/23210	0.000190057	0.00473012	0.00398251	Lmnb1/Npm1/Cdk1/Dtl	4
GO:0044030	GO:0044030	regulation of DNA methylation	4/224	31/23210	0.000216571	0.00534009	0.00449607	Kcnq1ot1/Ftx/Brca1/Grhl2	4
GO:0000726	GO:0000726	non-recombinational repair	5/224	57/23210	0.000222859	0.00534661	0.00450156	Pola1/Nsd2/Polq/Psmd14/Rif1	5
GO:0007091	GO:0007091	metaphase/anaphase transition of mitotic cell cycle	5/224	57/23210	0.000222859	0.00534661	0.00450156	Mad1l1/Cit/Gen1/Cenpe/Cdk5rap2	5
GO:0051310	GO:0051310	metaphase plate congression	5/224	57/23210	0.000222859	0.00534661	0.00450156	Mad1l1/Spag5/Cenpf/Cenpe/Kpnb1	5
GO:0046606	GO:0046606	negative regulation of centrosome cycle	3/224	13/23210	0.000236176	0.00561551	0.00472796	Npm1/Cdk5rap2/Kifc1	3
GO:0010965	GO:0010965	regulation of mitotic sister chromatid separation	5/224	58/23210	0.000241985	0.00565269	0.00475927	Mad1l1/Cit/Gen1/Cenpe/Cdk5rap2	5
GO:0044380	GO:0044380	protein localization to cytoskeleton	5/224	58/23210	0.000241985	0.00565269	0.00475927	Mid1/Kif20b/Pcm1/Anln/Spag5	5
GO:0060706	GO:0060706	cell differentiation involved in embryonic placenta development	4/224	32/23210	0.000245648	0.00568834	0.00478929	Xist/E2f7/Grhl2/Krt19	4
GO:0071824	GO:0071824	protein-DNA complex subunit organization	9/224	215/23210	0.000253842	0.00582743	0.00490639	Cenpp/Npm1/Kat6b/Hells/Hat1/Psme4/Nap1l1/Cenpe/Gtf2f2	9
GO:0065004	GO:0065004	protein-DNA complex assembly	8/224	172/23210	0.000276015	0.0062823	0.00528936	Cenpp/Npm1/Kat6b/Hells/Hat1/Nap1l1/Cenpe/Gtf2f2	8
GO:0016570	GO:0016570	histone modification	13/224	427/23210	0.000279578	0.00629219	0.00529769	Nsd2/Ogt/Rif1/Kat6b/Brca1/Bcor/Asxl2/Hat1/Ehmt1/Prkd1/Usp15/Setd7/Uhrf1	13
GO:0051495	GO:0051495	positive regulation of cytoskeleton organization	9/224	218/23210	0.000281176	0.00629219	0.00529769	Tpm1/Nav3/Braf/Npm1/Carmil1/Dlg1/Spag5/Evl/Cdk5rap2	9
GO:0044784	GO:0044784	metaphase/anaphase transition of cell cycle	5/224	60/23210	0.000283956	0.00630121	0.00530529	Mad1l1/Cit/Gen1/Cenpe/Cdk5rap2	5
GO:0061640	GO:0061640	cytoskeleton-dependent cytokinesis	6/224	93/23210	0.000286311	0.00630121	0.00530529	Sept11/Cit/Kif20b/Anln/Incenp/Kif4	6
GO:0001841	GO:0001841	neural tube formation	7/224	132/23210	0.000301563	0.00658247	0.00554209	Mthfd1l/Enah/Kif20b/Mthfd1/Grhl2/Luzp1/Gatad2a	7
GO:0051304	GO:0051304	chromosome separation	6/224	95/23210	0.00032128	0.00686561	0.00578048	Mad1l1/Cit/Top2a/Gen1/Cenpe/Cdk5rap2	6
GO:0006479	GO:0006479	protein methylation	8/224	176/23210	0.000322268	0.00686561	0.00578048	Nsd2/Ogt/Rif1/Brca1/Bcor/Asxl2/Ehmt1/Setd7	8
GO:0008213	GO:0008213	protein alkylation	8/224	176/23210	0.000322268	0.00686561	0.00578048	Nsd2/Ogt/Rif1/Brca1/Bcor/Asxl2/Ehmt1/Setd7	8
GO:0034504	GO:0034504	protein localization to nucleus	10/224	272/23210	0.000329724	0.00694538	0.00584764	Ipo5/Ogt/Npm1/Cdk1/Prkd1/Cse1l/Pola2/Syne1/Xpo1/Kpnb1	10
GO:0051306	GO:0051306	mitotic sister chromatid separation	5/224	62/23210	0.000331229	0.00694538	0.00584764	Mad1l1/Cit/Gen1/Cenpe/Cdk5rap2	5
GO:0032386	GO:0032386	regulation of intracellular transport	13/224	438/23210	0.000356364	0.00741403	0.00624222	Ipo5/Ogt/Braf/Ppp1r12a/Kif20b/Pcm1/Dnajc13/Rbm26/Spag5/Prkd1/Cdh3/Atp2a2/Xpo1	13
GO:0006304	GO:0006304	DNA modification	6/224	97/23210	0.00035951	0.00742151	0.00624852	Kcnq1ot1/Ftx/Brca1/Hells/Ehmt1/Grhl2	6
GO:0044774	GO:0044774	mitotic DNA integrity checkpoint	5/224	64/23210	0.000384229	0.00781071	0.0065762	Top2a/Topbp1/Clspn/Cdk1/Blm	5
GO:1905818	GO:1905818	regulation of chromosome separation	5/224	64/23210	0.000384229	0.00781071	0.0065762	Mad1l1/Cit/Gen1/Cenpe/Cdk5rap2	5
GO:0006417	GO:0006417	regulation of translation	11/224	332/23210	0.000406258	0.00819595	0.00690056	Igf2bp2/Eif2s3x/Npm1/Eif4g3/Igf2bp3/Larp1/Tyms/Ncl/Pus7/Elavl1/Caprin1	11
GO:0016445	GO:0016445	somatic diversification of immunoglobulins	5/224	65/23210	0.000413014	0.00826959	0.00696256	Nsd2/Polq/Rif1/Hspd1/Exo1	5
GO:0007094	GO:0007094	mitotic spindle assembly checkpoint	4/224	37/23210	0.000434456	0.00850703	0.00716247	Mad1l1/Gen1/Cenpe/Cdk5rap2	4
GO:0051693	GO:0051693	actin filament capping	4/224	37/23210	0.000434456	0.00850703	0.00716247	Tpm1/Carmil1/Eps8/Evl	4
GO:0071173	GO:0071173	spindle assembly checkpoint	4/224	37/23210	0.000434456	0.00850703	0.00716247	Mad1l1/Gen1/Cenpe/Cdk5rap2	4
GO:0045005	GO:0045005	DNA-dependent DNA replication maintenance of fidelity	4/224	38/23210	0.000481921	0.00936757	0.007887	Mms22l/Gen1/Pole/Blm	4
GO:0032535	GO:0032535	regulation of cellular component size	12/224	397/23210	0.000509389	0.00977189	0.00822741	Plekhh2/Cdh4/Cit/Tpm1/Ogt/Rtn4/Clasp2/Npm1/Carmil1/Eps8/Dlg1/Evl	12
GO:0006333	GO:0006333	chromatin assembly or disassembly	7/224	144/23210	0.000510061	0.00977189	0.00822741	Cenpp/Npm1/Kat6b/Hells/Hat1/Nap1l1/Tlk2	7
GO:0071174	GO:0071174	mitotic spindle checkpoint	4/224	39/23210	0.000532966	0.0101378	0.00853547	Mad1l1/Gen1/Cenpe/Cdk5rap2	4
GO:0000281	GO:0000281	mitotic cytokinesis	5/224	69/23210	0.000544696	0.0102347	0.00861706	Cit/Kif20b/Anln/Incenp/Kif4	5
GO:2000042	GO:2000042	negative regulation of double-strand break repair via homologous recombination	3/224	17/23210	0.000545747	0.0102347	0.00861706	Polq/Rif1/Parpbp	3
GO:0031062	GO:0031062	positive regulation of histone methylation	4/224	40/23210	0.000587739	0.0109451	0.00921519	Ogt/Rif1/Brca1/Asxl2	4
GO:0050657	GO:0050657	nucleic acid transport	7/224	148/23210	0.00060065	0.0110313	0.00928773	Igf2bp2/Xpo7/Ranbp17/Npm1/Igf2bp3/Rbm26/Xpo1	7
GO:0050658	GO:0050658	RNA transport	7/224	148/23210	0.00060065	0.0110313	0.00928773	Igf2bp2/Xpo7/Ranbp17/Npm1/Igf2bp3/Rbm26/Xpo1	7
GO:0031577	GO:0031577	spindle checkpoint	4/224	41/23210	0.000646391	0.0117001	0.00985085	Mad1l1/Gen1/Cenpe/Cdk5rap2	4
GO:0045841	GO:0045841	negative regulation of mitotic metaphase/anaphase transition	4/224	41/23210	0.000646391	0.0117001	0.00985085	Mad1l1/Gen1/Cenpe/Cdk5rap2	4
GO:0060712	GO:0060712	spongiotrophoblast layer development	3/224	18/23210	0.000650249	0.0117001	0.00985085	Xist/Plac1/Birc6	3
GO:0031334	GO:0031334	positive regulation of protein complex assembly	9/224	246/23210	0.000674836	0.0120124	0.0101138	Faf1/Nav3/Carmil1/Slf1/Dlg1/Asap1/Evl/Cdk5rap2/Gtf2f2	9
GO:0051236	GO:0051236	establishment of RNA localization	7/224	151/23210	0.000676627	0.0120124	0.0101138	Igf2bp2/Xpo7/Ranbp17/Npm1/Igf2bp3/Rbm26/Xpo1	7
GO:0001843	GO:0001843	neural tube closure	6/224	110/23210	0.000702534	0.0123416	0.0103909	Mthfd1l/Enah/Kif20b/Mthfd1/Grhl2/Gatad2a	6
GO:0045740	GO:0045740	positive regulation of DNA replication	4/224	42/23210	0.000709073	0.0123416	0.0103909	Faf1/Npm1/Cdk1/E2f7	4
GO:2000816	GO:2000816	negative regulation of mitotic sister chromatid separation	4/224	42/23210	0.000709073	0.0123416	0.0103909	Mad1l1/Gen1/Cenpe/Cdk5rap2	4
GO:0031056	GO:0031056	regulation of histone modification	7/224	153/23210	0.000731374	0.0126471	0.0106482	Ogt/Rif1/Brca1/Bcor/Asxl2/Prkd1/Setd7	7
GO:0060606	GO:0060606	tube closure	6/224	111/23210	0.000736789	0.0126585	0.0106578	Mthfd1l/Enah/Kif20b/Mthfd1/Grhl2/Gatad2a	6
GO:0001838	GO:0001838	embryonic epithelial tube formation	7/224	154/23210	0.000760031	0.0129741	0.0109235	Mthfd1l/Enah/Kif20b/Mthfd1/Grhl2/Luzp1/Gatad2a	7
GO:1902100	GO:1902100	negative regulation of metaphase/anaphase transition of cell cycle	4/224	43/23210	0.000775935	0.0131612	0.0110811	Mad1l1/Gen1/Cenpe/Cdk5rap2	4
GO:0002200	GO:0002200	somatic diversification of immune receptors	5/224	75/23210	0.000798316	0.013287	0.0111869	Nsd2/Polq/Rif1/Hspd1/Exo1	5
GO:0051303	GO:0051303	establishment of chromosome localization	5/224	75/23210	0.000798316	0.013287	0.0111869	Mad1l1/Spag5/Cenpf/Cenpe/Kpnb1	5
GO:1900182	GO:1900182	positive regulation of protein localization to nucleus	5/224	75/23210	0.000798316	0.013287	0.0111869	Ipo5/Ogt/Npm1/Cdk1/Prkd1	5
GO:0010569	GO:0010569	regulation of double-strand break repair via homologous recombination	4/224	44/23210	0.000847129	0.0138527	0.0116632	Polq/Rif1/Blm/Parpbp	4
GO:1905819	GO:1905819	negative regulation of chromosome separation	4/224	44/23210	0.000847129	0.0138527	0.0116632	Mad1l1/Gen1/Cenpe/Cdk5rap2	4
GO:0050000	GO:0050000	chromosome localization	5/224	76/23210	0.000847911	0.0138527	0.0116632	Mad1l1/Spag5/Cenpf/Cenpe/Kpnb1	5
GO:0031032	GO:0031032	actomyosin structure organization	8/224	204/23210	0.000853789	0.0138637	0.0116725	Cit/Tpm1/Braf/Clasp2/Carmil1/Anln/Krt19/Evl	8
GO:0110053	GO:0110053	regulation of actin filament organization	9/224	255/23210	0.000870359	0.0140471	0.0118269	Plekhh2/Cit/Tpm1/Braf/Clasp2/Carmil1/Eps8/Dlg1/Evl	9
GO:0046653	GO:0046653	tetrahydrofolate metabolic process	3/224	20/23210	0.000895596	0.0141963	0.0119525	Mthfd1l/Tyms/Mthfd1	3
GO:0051383	GO:0051383	kinetochore organization	3/224	20/23210	0.000895596	0.0141963	0.0119525	Smc4/Smc2/Cenpe	3
GO:0070828	GO:0070828	heterochromatin organization	3/224	20/23210	0.000895596	0.0141963	0.0119525	Hells/Wdhd1/Setd7	3
GO:0033048	GO:0033048	negative regulation of mitotic sister chromatid segregation	4/224	45/23210	0.000922807	0.014541	0.0122428	Mad1l1/Gen1/Cenpe/Cdk5rap2	4
GO:0072175	GO:0072175	epithelial tube formation	7/224	161/23210	0.000986389	0.0154515	0.0130093	Mthfd1l/Enah/Kif20b/Mthfd1/Grhl2/Luzp1/Gatad2a	7
GO:2001020	GO:2001020	regulation of response to DNA damage stimulus	8/224	209/23210	0.000998146	0.015483	0.0130359	Nsd2/Polq/Npm1/Rif1/Brca1/Slf1/Blm/Parpbp	8
GO:0051321	GO:0051321	meiotic cell cycle	10/224	314/23210	0.00100003	0.015483	0.0130359	Smc4/Mki67/Top2a/Topbp1/Clasp2/Eif4g3/Smc2/Fanca/Smc3/Exo1	10
GO:0007095	GO:0007095	mitotic G2 DNA damage checkpoint	3/224	21/23210	0.00103746	0.0158778	0.0133683	Clspn/Cdk1/Blm	3
GO:0051016	GO:0051016	barbed-end actin filament capping	3/224	21/23210	0.00103746	0.0158778	0.0133683	Carmil1/Eps8/Evl	3
GO:0030261	GO:0030261	chromosome condensation	4/224	47/23210	0.00108822	0.0164554	0.0138546	Smc4/Top2a/Smc2/Cdk1	4
GO:0033046	GO:0033046	negative regulation of sister chromatid segregation	4/224	47/23210	0.00108822	0.0164554	0.0138546	Mad1l1/Gen1/Cenpe/Cdk5rap2	4
GO:0032984	GO:0032984	protein-containing complex disassembly	8/224	212/23210	0.00109373	0.0164554	0.0138546	Mid1/Plekhh2/Tpm1/Nav3/Clasp2/Carmil1/Eps8/Evl	8
GO:0007030	GO:0007030	Golgi organization	6/224	121/23210	0.001155	0.0171831	0.0144673	Cit/Arhgef7/Clasp2/Cdk1/Prkd1/Syne1	6
GO:0031497	GO:0031497	chromatin assembly	6/224	121/23210	0.001155	0.0171831	0.0144673	Cenpp/Npm1/Kat6b/Hells/Hat1/Nap1l1	6
GO:0045910	GO:0045910	negative regulation of DNA recombination	4/224	48/23210	0.00117826	0.0173354	0.0145955	Polq/Rif1/Blm/Parpbp	4
GO:0045931	GO:0045931	positive regulation of mitotic cell cycle	7/224	166/23210	0.00117826	0.0173354	0.0145955	Lmnb1/Kif20b/Slf1/Gen1/Cdk1/Cenpe/Dtl	7
GO:0032271	GO:0032271	regulation of protein polymerization	8/224	215/23210	0.00119649	0.017507	0.0147399	Tpm1/Nav3/Clasp2/Carmil1/Eps8/Dlg1/Evl/Cdk5rap2	8
GO:0034248	GO:0034248	regulation of cellular amide metabolic process	11/224	382/23210	0.00128028	0.0186305	0.0156859	Igf2bp2/Eif2s3x/Npm1/Eif4g3/Igf2bp3/Larp1/Tyms/Ncl/Pus7/Elavl1/Caprin1	11
GO:0001890	GO:0001890	placenta development	7/224	170/23210	0.00135187	0.0195654	0.0164731	Xist/Plac1/Cdkn1c/E2f7/Birc6/Grhl2/Krt19	7
GO:0051985	GO:0051985	negative regulation of chromosome segregation	4/224	50/23210	0.00137376	0.0196684	0.0165598	Mad1l1/Gen1/Cenpe/Cdk5rap2	4
GO:0090329	GO:0090329	regulation of DNA-dependent DNA replication	4/224	50/23210	0.00137376	0.0196684	0.0165598	Npm1/E2f7/Blm/Smc3	4
GO:0051258	GO:0051258	protein polymerization	9/224	274/23210	0.00143533	0.0204401	0.0172095	Diaph3/Tpm1/Nav3/Clasp2/Carmil1/Eps8/Dlg1/Evl/Cdk5rap2	9
GO:0006403	GO:0006403	RNA localization	7/224	172/23210	0.00144586	0.0204804	0.0172435	Igf2bp2/Xpo7/Ranbp17/Npm1/Igf2bp3/Rbm26/Xpo1	7
GO:0007018	GO:0007018	microtubule-based movement	9/224	275/23210	0.00147173	0.0207366	0.0174591	Kif15/Kif20b/Kif11/Pcm1/Kif1b/Cenpe/Kif4/Kifc1/Kpnb1	9
GO:0043254	GO:0043254	regulation of protein complex assembly	12/224	451/23210	0.00152745	0.0214084	0.0180247	Faf1/Tpm1/Nav3/Clasp2/Carmil1/Eps8/Slf1/Dlg1/Asap1/Evl/Cdk5rap2/Gtf2f2	12
GO:0031529	GO:0031529	ruffle organization	4/224	52/23210	0.00159083	0.0220645	0.0185772	Tpm1/Carmil1/Eps8/Evl	4
GO:0072698	GO:0072698	protein localization to microtubule cytoskeleton	4/224	52/23210	0.00159083	0.0220645	0.0185772	Mid1/Kif20b/Pcm1/Spag5	4
GO:0051492	GO:0051492	regulation of stress fiber assembly	5/224	88/23210	0.0016379	0.0225206	0.0189612	Tpm1/Braf/Clasp2/Carmil1/Evl	5
GO:0008064	GO:0008064	regulation of actin polymerization or depolymerization	7/224	176/23210	0.00164909	0.0225206	0.0189612	Plekhh2/Cit/Tpm1/Carmil1/Eps8/Dlg1/Evl	7
GO:0035148	GO:0035148	tube formation	7/224	176/23210	0.00164909	0.0225206	0.0189612	Mthfd1l/Enah/Kif20b/Mthfd1/Grhl2/Luzp1/Gatad2a	7
GO:0002204	GO:0002204	somatic recombination of immunoglobulin genes involved in immune response	4/224	53/23210	0.00170783	0.0228541	0.0192419	Nsd2/Rif1/Hspd1/Exo1	4
GO:0002208	GO:0002208	somatic diversification of immunoglobulins involved in immune response	4/224	53/23210	0.00170783	0.0228541	0.0192419	Nsd2/Rif1/Hspd1/Exo1	4
GO:0030071	GO:0030071	regulation of mitotic metaphase/anaphase transition	4/224	53/23210	0.00170783	0.0228541	0.0192419	Mad1l1/Gen1/Cenpe/Cdk5rap2	4
GO:0045190	GO:0045190	isotype switching	4/224	53/23210	0.00170783	0.0228541	0.0192419	Nsd2/Rif1/Hspd1/Exo1	4
GO:0006760	GO:0006760	folic acid-containing compound metabolic process	3/224	25/23210	0.00174383	0.0232191	0.0195493	Mthfd1l/Tyms/Mthfd1	3
GO:0030832	GO:0030832	regulation of actin filament length	7/224	179/23210	0.00181558	0.0240152	0.0202195	Plekhh2/Cit/Tpm1/Carmil1/Eps8/Dlg1/Evl	7
GO:0051496	GO:0051496	positive regulation of stress fiber assembly	4/224	54/23210	0.00183067	0.0240152	0.0202195	Tpm1/Braf/Carmil1/Evl	4
GO:0086001	GO:0086001	cardiac muscle cell action potential	4/224	54/23210	0.00183067	0.0240152	0.0202195	Kcnq1/Dlg1/Atp2a2/Slmap	4
GO:0015931	GO:0015931	nucleobase-containing compound transport	7/224	181/23210	0.00193363	0.0250873	0.0211222	Igf2bp2/Xpo7/Ranbp17/Npm1/Igf2bp3/Rbm26/Xpo1	7
GO:0051570	GO:0051570	regulation of histone H3-K9 methylation	3/224	26/23210	0.00195735	0.0250873	0.0211222	Rif1/Brca1/Setd7	3
GO:0098901	GO:0098901	regulation of cardiac muscle cell action potential	3/224	26/23210	0.00195735	0.0250873	0.0211222	Dlg1/Atp2a2/Slmap	3
GO:2000780	GO:2000780	negative regulation of double-strand break repair	3/224	26/23210	0.00195735	0.0250873	0.0211222	Polq/Rif1/Parpbp	3
GO:0045839	GO:0045839	negative regulation of mitotic nuclear division	4/224	55/23210	0.00195951	0.0250873	0.0211222	Mad1l1/Gen1/Cenpe/Cdk5rap2	4
GO:0016331	GO:0016331	morphogenesis of embryonic epithelium	7/224	182/23210	0.00199484	0.0252965	0.0212983	Mthfd1l/Enah/Kif20b/Mthfd1/Grhl2/Luzp1/Gatad2a	7
GO:2001252	GO:2001252	positive regulation of chromosome organization	7/224	182/23210	0.00199484	0.0252965	0.0212983	Ogt/Rif1/Brca1/Slf1/Asxl2/Prkd1/Cenpe	7
GO:0018205	GO:0018205	peptidyl-lysine modification	10/224	345/23210	0.00200917	0.0253574	0.0213496	Nsd2/Ogt/Rif1/Kat6b/Brca1/Bcor/Asxl2/Hat1/Ehmt1/Setd7	10
GO:0051168	GO:0051168	nuclear export	6/224	135/23210	0.00202005	0.0253744	0.0213639	Xpo7/Ranbp17/Npm1/Rbm26/Cse1l/Xpo1	6
GO:1902099	GO:1902099	regulation of metaphase/anaphase transition of cell cycle	4/224	56/23210	0.00209448	0.0261859	0.0220471	Mad1l1/Gen1/Cenpe/Cdk5rap2	4
GO:0034728	GO:0034728	nucleosome organization	6/224	137/23210	0.00217531	0.0269562	0.0226957	Cenpp/Npm1/Kat6b/Hat1/Psme4/Nap1l1	6
GO:0010971	GO:0010971	positive regulation of G2/M transition of mitotic cell cycle	3/224	27/23210	0.00218645	0.0269562	0.0226957	Lmnb1/Cdk1/Dtl	3
GO:0045738	GO:0045738	negative regulation of DNA repair	3/224	27/23210	0.00218645	0.0269562	0.0226957	Polq/Rif1/Parpbp	3
GO:0016447	GO:0016447	somatic recombination of immunoglobulin gene segments	4/224	58/23210	0.00238341	0.029249	0.0246261	Nsd2/Rif1/Hspd1/Exo1	4
GO:1901989	GO:1901989	positive regulation of cell cycle phase transition	5/224	96/23210	0.00240183	0.0293398	0.0247026	Lmnb1/Npm1/Cdk1/Cenpe/Dtl	5
GO:0010458	GO:0010458	exit from mitosis	3/224	28/23210	0.00243153	0.0294326	0.0247807	Clasp2/Cdkn1c/Eps8	3
GO:0034508	GO:0034508	centromere complex assembly	3/224	28/23210	0.00243153	0.0294326	0.0247807	Cenpp/Hells/Cenpe	3
GO:1903829	GO:1903829	positive regulation of cellular protein localization	9/224	297/23210	0.00247953	0.0298735	0.0251519	Ipo5/Ogt/Rtn4/Npm1/Kif20b/Dlg1/Pcm1/Cdk1/Prkd1	9
GO:0006338	GO:0006338	chromatin remodeling	6/224	141/23210	0.00251267	0.0298735	0.0251519	Tsix/Cenpp/Npm1/Hells/Baz1a/Psme4	6
GO:0006334	GO:0006334	nucleosome assembly	5/224	97/23210	0.00251283	0.0298735	0.0251519	Cenpp/Npm1/Kat6b/Hat1/Nap1l1	5
GO:0031058	GO:0031058	positive regulation of histone modification	5/224	97/23210	0.00251283	0.0298735	0.0251519	Ogt/Rif1/Brca1/Asxl2/Prkd1	5
GO:0008347	GO:0008347	glial cell migration	4/224	59/23210	0.00253767	0.0300348	0.0252877	Srgap2/Rtn4/Arhgef7/Fubp1	4
GO:0022411	GO:0022411	cellular component disassembly	10/224	357/23210	0.00257227	0.0303096	0.0255191	Mid1/Plekhh2/Tpm1/Top2a/Nav3/Clasp2/Carmil1/Eps8/Cdk1/Evl	10
GO:0021915	GO:0021915	neural tube development	7/224	191/23210	0.00261575	0.0306861	0.0258361	Mthfd1l/Enah/Kif20b/Mthfd1/Grhl2/Luzp1/Gatad2a	7
GO:0000731	GO:0000731	DNA synthesis involved in DNA repair	3/224	29/23210	0.00269294	0.0313822	0.0264221	Pola1/Pole/Dtl	3
GO:0030837	GO:0030837	negative regulation of actin filament polymerization	4/224	60/23210	0.00269865	0.0313822	0.0264221	Tpm1/Carmil1/Eps8/Evl	4
GO:0110020	GO:0110020	regulation of actomyosin structure organization	5/224	100/23210	0.00286816	0.0332083	0.0279596	Tpm1/Braf/Clasp2/Carmil1/Evl	5
GO:1902905	GO:1902905	positive regulation of supramolecular fiber organization	7/224	195/23210	0.00293519	0.0338373	0.0284892	Tpm1/Nav3/Braf/Carmil1/Dlg1/Evl/Cdk5rap2	7
GO:0031297	GO:0031297	replication fork processing	3/224	30/23210	0.00297104	0.0341029	0.0287129	Mms22l/Gen1/Blm	3
GO:0000077	GO:0000077	DNA damage checkpoint	5/224	101/23210	0.00299428	0.0342222	0.0288133	Brca1/Clspn/Cdk1/Blm/Dtl	5
GO:0000018	GO:0000018	regulation of DNA recombination	5/224	103/23210	0.00325847	0.0365453	0.0307692	Nsd2/Polq/Rif1/Blm/Parpbp	5
GO:0030038	GO:0030038	contractile actin filament bundle assembly	5/224	103/23210	0.00325847	0.0365453	0.0307692	Tpm1/Braf/Clasp2/Carmil1/Evl	5
GO:0032231	GO:0032231	regulation of actin filament bundle assembly	5/224	103/23210	0.00325847	0.0365453	0.0307692	Tpm1/Braf/Clasp2/Carmil1/Evl	5
GO:0043149	GO:0043149	stress fiber assembly	5/224	103/23210	0.00325847	0.0365453	0.0307692	Tpm1/Braf/Clasp2/Carmil1/Evl	5
GO:2000781	GO:2000781	positive regulation of double-strand break repair	3/224	31/23210	0.00326616	0.0365453	0.0307692	Rif1/Slf1/Blm	3
GO:0032388	GO:0032388	positive regulation of intracellular transport	7/224	200/23210	0.00337557	0.0376115	0.0316669	Ipo5/Kif20b/Pcm1/Rbm26/Spag5/Prkd1/Cdh3	7
GO:0032233	GO:0032233	positive regulation of actin filament bundle assembly	4/224	64/23210	0.00341261	0.0378657	0.0318809	Tpm1/Braf/Carmil1/Evl	4
GO:0042558	GO:0042558	pteridine-containing compound metabolic process	3/224	32/23210	0.00357863	0.0395431	0.0332932	Mthfd1l/Tyms/Mthfd1	3
GO:0002381	GO:0002381	immunoglobulin production involved in immunoglobulin mediated immune response	4/224	65/23210	0.0036093	0.0397172	0.0334398	Nsd2/Rif1/Hspd1/Exo1	4
GO:0045739	GO:0045739	positive regulation of DNA repair	4/224	66/23210	0.00381355	0.0417921	0.0351868	Rif1/Brca1/Slf1/Blm	4
GO:0016458	GO:0016458	gene silencing	8/224	260/23210	0.00388158	0.0420388	0.0353945	Kcnq1ot1/Kcnq1/Atad2/Rif1/Hells/Hat1/Drosha/Elavl1	8
GO:0007026	GO:0007026	negative regulation of microtubule depolymerization	3/224	33/23210	0.00390875	0.0420388	0.0353945	Mid1/Nav3/Clasp2	3
GO:0032467	GO:0032467	positive regulation of cytokinesis	3/224	33/23210	0.00390875	0.0420388	0.0353945	Cit/Cspp1/Kif20b	3
GO:0000012	GO:0000012	single strand break repair	2/224	10/23210	0.00396522	0.0420388	0.0353945	Smc4/Smc2	2
GO:0010452	GO:0010452	histone H3-K36 methylation	2/224	10/23210	0.00396522	0.0420388	0.0353945	Nsd2/Bcor	2
GO:0018026	GO:0018026	peptidyl-lysine monomethylation	2/224	10/23210	0.00396522	0.0420388	0.0353945	Ehmt1/Setd7	2
GO:0032875	GO:0032875	regulation of DNA endoreduplication	2/224	10/23210	0.00396522	0.0420388	0.0353945	E2f7/Smc3	2
GO:0033314	GO:0033314	mitotic DNA replication checkpoint	2/224	10/23210	0.00396522	0.0420388	0.0353945	Topbp1/Clspn	2
GO:0051028	GO:0051028	mRNA transport	5/224	108/23210	0.00399183	0.0420388	0.0353945	Igf2bp2/Xpo7/Ranbp17/Igf2bp3/Xpo1	5
GO:0002562	GO:0002562	somatic diversification of immune receptors via germline recombination within a single locus	4/224	67/23210	0.0040255	0.0420388	0.0353945	Nsd2/Rif1/Hspd1/Exo1	4
GO:0016444	GO:0016444	somatic cell DNA recombination	4/224	67/23210	0.0040255	0.0420388	0.0353945	Nsd2/Rif1/Hspd1/Exo1	4
GO:0051784	GO:0051784	negative regulation of nuclear division	4/224	67/23210	0.0040255	0.0420388	0.0353945	Mad1l1/Gen1/Cenpe/Cdk5rap2	4
GO:0140115	GO:0140115	export across plasma membrane	3/224	34/23210	0.00425682	0.0442809	0.0372821	Kcnq1/Atp1b1/Dlg1	3
GO:0017038	GO:0017038	protein import	7/224	209/23210	0.00429324	0.0444344	0.0374114	Ipo5/Hspd1/Prkd1/Cse1l/Pola2/Agk/Kpnb1	7
GO:0010256	GO:0010256	endomembrane system organization	10/224	384/23210	0.00430495	0.0444344	0.0374114	Cit/Rtn4/Arhgef7/Clasp2/Asap1/Cdk1/Dnajc13/Prkd1/Atp2a2/Syne1	10
GO:0055117	GO:0055117	regulation of cardiac muscle contraction	4/224	69/23210	0.00447299	0.0459907	0.0387217	Kcnq1/Atp1b1/Dlg1/Atp2a2	4
GO:0051567	GO:0051567	histone H3-K9 methylation	3/224	35/23210	0.00462311	0.0473454	0.0398623	Rif1/Brca1/Setd7	3
GO:0046822	GO:0046822	regulation of nucleocytoplasmic transport	5/224	112/23210	0.00465809	0.0473454	0.0398623	Ipo5/Ppp1r12a/Rbm26/Prkd1/Xpo1	5
GO:1905269	GO:1905269	positive regulation of chromatin organization	5/224	112/23210	0.00465809	0.0473454	0.0398623	Ogt/Rif1/Brca1/Asxl2/Prkd1	5
GO:0051291	GO:0051291	protein heterooligomerization	6/224	160/23210	0.00467658	0.0473526	0.0398684	Sept11/Pdss1/Ogt/Braf/Mat2a/Hbb-y	6
GO:0030206	GO:0030206	chondroitin sulfate biosynthetic process	2/224	11/23210	0.00481566	0.0474967	0.0399897	Chsy1/Csgalnact1	2
GO:0030953	GO:0030953	astral microtubule organization	2/224	11/23210	0.00481566	0.0474967	0.0399897	Dlg1/Kpnb1	2
GO:0031055	GO:0031055	chromatin remodeling at centromere	2/224	11/23210	0.00481566	0.0474967	0.0399897	Cenpp/Hells	2
GO:0035999	GO:0035999	tetrahydrofolate interconversion	2/224	11/23210	0.00481566	0.0474967	0.0399897	Tyms/Mthfd1	2
GO:0042023	GO:0042023	DNA endoreduplication	2/224	11/23210	0.00481566	0.0474967	0.0399897	E2f7/Smc3	2
GO:0051574	GO:0051574	positive regulation of histone H3-K9 methylation	2/224	11/23210	0.00481566	0.0474967	0.0399897	Rif1/Brca1	2
GO:0061085	GO:0061085	regulation of histone H3-K27 methylation	2/224	11/23210	0.00481566	0.0474967	0.0399897	Ogt/Asxl2	2
GO:0031114	GO:0031114	regulation of microtubule depolymerization	3/224	36/23210	0.0050079	0.0492105	0.0414326	Mid1/Nav3/Clasp2	3
GO:0006732	GO:0006732	coenzyme metabolic process	9/224	331/23210	0.00503976	0.0492859	0.0414961	Gphn/Mthfd1l/Pdss1/Ogt/Mat2a/Acaca/Tyms/Mthfd1/Cs	9
GO:0032970	GO:0032970	regulation of actin filament-based process	10/224	393/23210	0.00505259	0.0492859	0.0414961	Plekhh2/Cit/Tpm1/Braf/Clasp2/Carmil1/Eps8/Dlg1/Evl/Atp2a2	10

## Sheet: STGC_Enriched_E14.5_GO.csv
	ID	Description	GeneRatio	BgRatio	pvalue	p.adjust	qvalue	geneID	Count
GO:0007264	GO:0007264	small GTPase mediated signal transduction	33/368	485/23210	2.45103e-12	8.64234e-09	7.32988e-09	Map4k4/Cyth1/Arrb1/Rgl2/Arhgap26/Plekhg2/Dock9/Arhgap31/Arhgef1/Dock1/Itga3/Arhgef25/Psd3/Cgnl1/Mras/Dock8/Rapgef5/Pdgfrb/Heg1/Dnmbp/Tgfb2/Arhgef6/Map2k1/Dbnl/Cyth3/Arhgef10/Ralgps1/Ntn1/Gna12/Camk2d/Wasf1/Farp2/Src	33
GO:0051056	GO:0051056	regulation of small GTPase mediated signal transduction	23/368	259/23210	3.06061e-11	5.39586e-08	4.57642e-08	Map4k4/Cyth1/Arrb1/Rgl2/Arhgap26/Plekhg2/Arhgef1/Itga3/Arhgef25/Psd3/Cgnl1/Pdgfrb/Heg1/Dnmbp/Tgfb2/Arhgef6/Map2k1/Cyth3/Arhgef10/Ralgps1/Camk2d/Farp2/Src	23
GO:0046578	GO:0046578	regulation of Ras protein signal transduction	20/368	228/23210	7.54375e-10	8.86643e-07	7.51993e-07	Map4k4/Cyth1/Arrb1/Rgl2/Plekhg2/Arhgef1/Itga3/Arhgef25/Psd3/Pdgfrb/Heg1/Dnmbp/Tgfb2/Arhgef6/Map2k1/Cyth3/Arhgef10/Ralgps1/Camk2d/Farp2	20
GO:0007265	GO:0007265	Ras protein signal transduction	25/368	414/23210	1.35743e-08	1.19658e-05	1.01486e-05	Map4k4/Cyth1/Arrb1/Rgl2/Plekhg2/Arhgef1/Itga3/Arhgef25/Psd3/Mras/Pdgfrb/Heg1/Dnmbp/Tgfb2/Arhgef6/Map2k1/Dbnl/Cyth3/Arhgef10/Ralgps1/Ntn1/Gna12/Camk2d/Wasf1/Farp2	25
GO:0007044	GO:0007044	cell-substrate junction assembly	11/368	86/23210	1.15963e-07	8.17768e-05	6.93578e-05	Dst/Ptprj/Map4k4/Fn1/Pxn/Macf1/Acvrl1/Tns1/Lamc1/Src/Bcas3	11
GO:0043087	GO:0043087	regulation of GTPase activity	18/368	295/23210	1.29446e-06	0.000760708	0.000645184	Rabgap1l/Plxna4/Map4k4/Arrb1/Chn2/Dock9/Plxnb1/Rgma/Snx9/Dock8/Gnas/Tbc1d8/Ptprn2/Map2k1/Usp6nl/Arhgef10/Pkp4/Bcas3	18
GO:0060560	GO:0060560	developmental growth involved in morphogenesis	17/368	270/23210	1.66577e-06	0.000839071	0.000711646	Tmem108/Plxna4/App/Map1b/Fn1/Med12/Rgma/Kdm5b/Sema6a/Lzts2/Dbnl/Ulk2/Ntn1/Wasf1/Rnf157/Sema5b/Fgfr2	17
GO:0043547	GO:0043547	positive regulation of GTPase activity	15/368	217/23210	2.17113e-06	0.000956928	0.000811604	Rabgap1l/Map4k4/Chn2/Dock9/Plxnb1/Rgma/Snx9/Dock8/Gnas/Tbc1d8/Map2k1/Usp6nl/Arhgef10/Pkp4/Bcas3	15
GO:0034330	GO:0034330	cell junction organization	16/368	255/23210	3.51947e-06	0.00137885	0.00116945	Dst/Ptprj/Map4k4/Cdh24/Fn1/Heg1/Pxn/Tgfb2/Macf1/Acvrl1/Tns1/Pkp4/Lamc1/Lims2/Src/Bcas3	16
GO:0061458	GO:0061458	reproductive system development	22/368	453/23210	3.91652e-06	0.00138097	0.00117125	Epas1/Fndc3a/Pparg/Arid5b/Arrb1/Cited1/Fbxw8/Hsd17b2/Hsd17b4/Nrip1/Pkd1/Kdm5b/Stra6/Ncoa3/Tgfb2/Ing2/Bcl2l1/Map2k1/Plekha5/Grk2/Fgfr2/Src	22
GO:0034329	GO:0034329	cell junction assembly	14/368	206/23210	5.75947e-06	0.00184617	0.0015658	Dst/Ptprj/Map4k4/Cdh24/Fn1/Heg1/Pxn/Macf1/Acvrl1/Tns1/Pkp4/Lamc1/Src/Bcas3	14
GO:0010810	GO:0010810	regulation of cell-substrate adhesion	14/368	211/23210	7.58612e-06	0.00222906	0.00189054	Prkce/Ptprj/Map4k4/Fn1/Dock1/Itga3/Pik3r1/St6gal1/Bcar1/Macf1/Acvrl1/Lims2/Src/Bcas3	14
GO:0001667	GO:0001667	ameboidal-type cell migration	20/368	406/23210	8.76517e-06	0.00237738	0.00201634	Prkce/Map4k4/Pparg/Arid5b/Fn1/Dock1/Itga3/Pxn/Prl7d1/Tgfb2/Sema6a/Bcar1/Acvr1/Macf1/Acvrl1/Tns1/Gna12/Sema5b/Src/Bcas3	20
GO:0010769	GO:0010769	regulation of cell morphogenesis involved in differentiation	18/368	343/23210	1.05696e-05	0.00249812	0.00211874	Plxna4/Map1b/Fn1/Fbxw8/Dock1/Plxnb1/Snap91/Rgma/St6gal1/Sema6a/Bcar1/Map2k1/Dbnl/Ulk2/Ntn1/Stau2/Sema5b/Lims2	18
GO:0035023	GO:0035023	regulation of Rho protein signal transduction	11/368	135/23210	1.06273e-05	0.00249812	0.00211874	Arrb1/Plekhg2/Arhgef1/Itga3/Arhgef25/Pdgfrb/Heg1/Dnmbp/Arhgef6/Arhgef10/Farp2	11
GO:0048608	GO:0048608	reproductive structure development	21/368	449/23210	1.15016e-05	0.00253466	0.00214974	Epas1/Fndc3a/Pparg/Arid5b/Arrb1/Cited1/Fbxw8/Hsd17b2/Hsd17b4/Nrip1/Pkd1/Kdm5b/Stra6/Ncoa3/Tgfb2/Ing2/Bcl2l1/Map2k1/Grk2/Fgfr2/Src	21
GO:0007266	GO:0007266	Rho protein signal transduction	13/368	195/23210	1.52175e-05	0.00315629	0.00267696	Arrb1/Plekhg2/Arhgef1/Itga3/Arhgef25/Pdgfrb/Heg1/Dnmbp/Arhgef6/Arhgef10/Ntn1/Gna12/Farp2	13
GO:1904705	GO:1904705	regulation of vascular smooth muscle cell proliferation	7/368	53/23210	1.95856e-05	0.00363467	0.00308269	Pparg/Rgs5/Mef2d/Foxj2/Camk2d/Pdcd4/Grk2	7
GO:1990874	GO:1990874	vascular smooth muscle cell proliferation	7/368	53/23210	1.95856e-05	0.00363467	0.00308269	Pparg/Rgs5/Mef2d/Foxj2/Camk2d/Pdcd4/Grk2	7
GO:0060348	GO:0060348	bone development	14/368	231/23210	2.10821e-05	0.00371677	0.00315232	Pappa2/Rabgap1l/Foxn3/Smad1/Meis1/Plxnb1/Nbeal2/Mef2d/Alpl/Gnas/Sulf2/Tjp2/Fgfr2/Src	14
GO:0033002	GO:0033002	muscle cell proliferation	14/368	234/23210	2.43286e-05	0.00408489	0.00346454	Pparg/Smad1/Rgs5/Meis1/Pik3r1/Mef2d/Foxj2/Pdgfrb/Tgfb2/Il6ra/Camk2d/Pdcd4/Grk2/Fgfr2	14
GO:0018107	GO:0018107	peptidyl-threonine phosphorylation	10/368	125/23210	3.13266e-05	0.0048851	0.00414323	Stk39/App/Lmtk2/Spred2/Csnk1e/Map2k1/Acvr1/Hk1/Camk2d/Grk2	10
GO:0031589	GO:0031589	cell-substrate adhesion	17/368	339/23210	3.30118e-05	0.0048851	0.00414323	Prkce/Ptprj/Map4k4/Fndc3b/Fn1/Dock1/Itga3/Pik3r1/St6gal1/Pxn/Bcar1/Macf1/Acvrl1/Lamc1/Lims2/Src/Bcas3	17
GO:0034446	GO:0034446	substrate adhesion-dependent cell spreading	9/368	101/23210	3.32508e-05	0.0048851	0.00414323	Fndc3b/Fn1/Dock1/St6gal1/Pxn/Bcar1/Lamc1/Lims2/Src	9
GO:0071375	GO:0071375	cellular response to peptide hormone stimulus	14/368	244/23210	3.85473e-05	0.00543671	0.00461107	Pparg/Atp2b1/Ghr/Pik3r1/Grb10/Ptpre/Kat2b/Pxn/Foxo4/Bcar1/Socs2/Dnaic1/Grk2/Src	14
GO:0010770	GO:0010770	positive regulation of cell morphogenesis involved in differentiation	12/368	185/23210	4.22038e-05	0.00572349	0.00485429	Plxna4/Map1b/Fn1/Fbxw8/Dock1/Plxnb1/Snap91/Map2k1/Dbnl/Ntn1/Stau2/Lims2	12
GO:0007163	GO:0007163	establishment or maintenance of cell polarity	13/368	216/23210	4.44737e-05	0.00580793	0.00492591	Mtcl1/Map1b/Cyth1/Insc/Snap91/Myo18a/Dock8/Pkd1/Macf1/Cyth3/Lmna/Sdccag8/Bcas3	13
GO:1904894	GO:1904894	positive regulation of STAT cascade	9/368	106/23210	4.87847e-05	0.00614339	0.00521043	Prl2b1/Prl3b1/Prl8a9/Mgat5/Prl7a2/Ghr/Stra6/Prl7d1/Il6ra	9
GO:0018210	GO:0018210	peptidyl-threonine modification	10/368	133/23210	5.32966e-05	0.00648013	0.00549603	Stk39/App/Lmtk2/Spred2/Csnk1e/Map2k1/Acvr1/Hk1/Camk2d/Grk2	10
GO:1903489	GO:1903489	positive regulation of lactation	5/368	27/23210	5.90643e-05	0.00651447	0.00552516	Prl2b1/Prl3b1/Prl8a9/Prl7a2/Prl7d1	5
GO:1901653	GO:1901653	cellular response to peptide	15/368	287/23210	5.99235e-05	0.00651447	0.00552516	App/Pparg/Atp2b1/Ghr/Pik3r1/Grb10/Ptpre/Kat2b/Pxn/Foxo4/Bcar1/Socs2/Dnaic1/Grk2/Src	15
GO:0030879	GO:0030879	mammary gland development	11/368	163/23210	6.13469e-05	0.00651447	0.00552516	Prl2b1/Prl3b1/Prl8a9/Prl7a2/Kdm5b/Prl7d1/Ncoa3/Socs2/Ntn1/Fgfr2/Src	11
GO:0048660	GO:0048660	regulation of smooth muscle cell proliferation	11/368	163/23210	6.13469e-05	0.00651447	0.00552516	Pparg/Rgs5/Pik3r1/Mef2d/Foxj2/Pdgfrb/Il6ra/Camk2d/Pdcd4/Grk2/Fgfr2	11
GO:0032869	GO:0032869	cellular response to insulin stimulus	12/368	193/23210	6.3629e-05	0.00651447	0.00552516	Pparg/Atp2b1/Pik3r1/Grb10/Ptpre/Kat2b/Foxo4/Bcar1/Socs2/Dnaic1/Grk2/Src	12
GO:0032868	GO:0032868	response to insulin	13/368	225/23210	6.75682e-05	0.00651447	0.00552516	Pparg/Cited1/Atp2b1/Pik3r1/Grb10/Ptpre/Kat2b/Foxo4/Bcar1/Socs2/Dnaic1/Grk2/Src	13
GO:0048511	GO:0048511	rhythmic process	15/368	291/23210	7.00295e-05	0.00651447	0.00552516	Lepr/Ncoa2/Zfhx3/Pparg/Arrb1/Ghrh/Npas2/Nrip1/Kdm5b/Kat2b/Csnk1e/Rora/Noct/Grk2/Src	15
GO:0045926	GO:0045926	negative regulation of growth	14/368	258/23210	7.04593e-05	0.00651447	0.00552516	Ptprj/Pparg/Wwc1/Meis1/Rgma/Gnas/Tgfb2/Sema6a/Acvrl1/Socs2/Ulk2/Ntn1/Smarca2/Sema5b	14
GO:0030010	GO:0030010	establishment of cell polarity	10/368	138/23210	7.2821e-05	0.00651447	0.00552516	Map1b/Cyth1/Insc/Myo18a/Dock8/Pkd1/Cyth3/Lmna/Sdccag8/Bcas3	10
GO:0060396	GO:0060396	growth hormone receptor signaling pathway	4/368	15/23210	7.39021e-05	0.00651447	0.00552516	Ghr/Pik3r1/Pxn/Socs2	4
GO:0071378	GO:0071378	cellular response to growth hormone stimulus	4/368	15/23210	7.39021e-05	0.00651447	0.00552516	Ghr/Pik3r1/Pxn/Socs2	4
GO:0048588	GO:0048588	developmental cell growth	14/368	260/23210	7.65199e-05	0.00655361	0.00555835	Tmem108/Plxna4/App/Map1b/Fn1/Rgma/Sema6a/Dbnl/Ulk2/Ntn1/Camk2d/Wasf1/Rnf157/Sema5b	14
GO:0048659	GO:0048659	smooth muscle cell proliferation	11/368	168/23210	8.0577e-05	0.00655361	0.00555835	Pparg/Rgs5/Pik3r1/Mef2d/Foxj2/Pdgfrb/Il6ra/Camk2d/Pdcd4/Grk2/Fgfr2	11
GO:0048638	GO:0048638	regulation of developmental growth	18/368	401/23210	8.18861e-05	0.00655361	0.00555835	Plxna4/App/Map1b/Ghrh/Wwc1/Fn1/Meis1/Ghr/Rgma/Gnas/Sema6a/Socs2/Dbnl/Ulk2/Ntn1/Rnf157/Sema5b/Fgfr2	18
GO:0032922	GO:0032922	circadian regulation of gene expression	7/368	66/23210	8.29542e-05	0.00655361	0.00555835	Ncoa2/Zfhx3/Npas2/Nrip1/Csnk1e/Rora/Noct	7
GO:1903487	GO:1903487	regulation of lactation	5/368	29/23210	8.46517e-05	0.00655361	0.00555835	Prl2b1/Prl3b1/Prl8a9/Prl7a2/Prl7d1	5
GO:1900076	GO:1900076	regulation of cellular response to insulin stimulus	8/368	89/23210	8.5498e-05	0.00655361	0.00555835	Pparg/Atp2b1/Pik3r1/Grb10/Ptpre/Socs2/Grk2/Src	8
GO:0050770	GO:0050770	regulation of axonogenesis	12/368	205/23210	0.000113134	0.00848744	0.0071985	Plxna4/Map1b/Fn1/Plxnb1/Snap91/Rgma/Sema6a/Map2k1/Dbnl/Ulk2/Ntn1/Sema5b	12
GO:0048011	GO:0048011	neurotrophin TRK receptor signaling pathway	5/368	31/23210	0.000118007	0.00866859	0.00735214	Tmem108/Lmtk2/Bcar1/Wasf1/Src	5
GO:0042752	GO:0042752	regulation of circadian rhythm	9/368	122/23210	0.000145191	0.0104478	0.00886118	Lepr/Zfhx3/Pparg/Ghrh/Npas2/Kdm5b/Csnk1e/Rora/Noct	9
GO:0035264	GO:0035264	multicellular organism growth	12/368	212/23210	0.000155078	0.0109361	0.0092753	App/Adarb1/Arid5b/Ghrh/Ghr/Kmt2c/Gnas/Heg1/Ncoa3/Gpd2/Socs2/Rbbp6	12
GO:0060416	GO:0060416	response to growth hormone	4/368	18/23210	0.000159549	0.0110308	0.00935557	Ghr/Pik3r1/Pxn/Socs2	4
GO:0010660	GO:0010660	regulation of muscle cell apoptotic process	8/368	98/23210	0.000168402	0.0114189	0.0096848	Pparg/Arrb1/Ghrh/Rgl2/Pik3r1/Camk2d/Pdcd4/Grk2	8
GO:0048732	GO:0048732	gland development	19/368	467/23210	0.000187656	0.0117632	0.00997682	Prl2b1/Prl3b1/Prl8a9/Arid5b/Ghrh/Prl7a2/Pkd1/Kdm5b/Pdgfrb/Stra6/Prl7d1/Ncoa3/Map2k1/Socs2/Sulf2/Ntn1/Lims2/Fgfr2/Src	19
GO:0048640	GO:0048640	negative regulation of developmental growth	9/368	127/23210	0.000196883	0.0117632	0.00997682	Wwc1/Meis1/Rgma/Gnas/Sema6a/Socs2/Ulk2/Ntn1/Sema5b	9
GO:0061387	GO:0061387	regulation of extent of cell growth	9/368	127/23210	0.000196883	0.0117632	0.00997682	Plxna4/Map1b/Fn1/Rgma/Sema6a/Dbnl/Ulk2/Ntn1/Sema5b	9
GO:0032011	GO:0032011	ARF protein signal transduction	4/368	19/23210	0.000199577	0.0117632	0.00997682	Map4k4/Cyth1/Psd3/Cyth3	4
GO:0032012	GO:0032012	regulation of ARF protein signal transduction	4/368	19/23210	0.000199577	0.0117632	0.00997682	Map4k4/Cyth1/Psd3/Cyth3	4
GO:0001558	GO:0001558	regulation of cell growth	18/368	431/23210	0.00020071	0.0117632	0.00997682	4932438A13Rik/Plxna4/Ptprj/Map1b/Pparg/Fn1/Rgma/Ncoa3/Tgfb2/Sema6a/Acvrl1/Socs2/Dbnl/Ulk2/Ntn1/Smarca2/Rnf157/Sema5b	18
GO:0007045	GO:0007045	cell-substrate adherens junction assembly	7/368	76/23210	0.000203393	0.0117632	0.00997682	Ptprj/Map4k4/Pxn/Macf1/Acvrl1/Src/Bcas3	7
GO:0048041	GO:0048041	focal adhesion assembly	7/368	76/23210	0.000203393	0.0117632	0.00997682	Ptprj/Map4k4/Pxn/Macf1/Acvrl1/Src/Bcas3	7
GO:0007409	GO:0007409	axonogenesis	19/368	470/23210	0.000203505	0.0117632	0.00997682	Dst/Plxna4/App/Adarb1/Map1b/Fn1/Lmtk2/Plxnb1/Snap91/Rgma/Tgfb2/Sema6a/Map2k1/Dbnl/Ulk2/Ntn1/Kif5c/Sema5b/Fgfr2	19
GO:0097696	GO:0097696	STAT cascade	11/368	187/23210	0.000207705	0.0118124	0.0100185	Prl2b1/Prl3b1/Prl8a9/Mgat5/Prl7a2/Ghr/Pkd1/Stra6/Prl7d1/Il6ra/Socs2	11
GO:0046427	GO:0046427	positive regulation of JAK-STAT cascade	8/368	102/23210	0.00022217	0.0122402	0.0103813	Prl2b1/Prl3b1/Prl8a9/Prl7a2/Ghr/Stra6/Prl7d1/Il6ra	8
GO:0050772	GO:0050772	positive regulation of axonogenesis	8/368	102/23210	0.00022217	0.0122402	0.0103813	Plxna4/Map1b/Fn1/Plxnb1/Snap91/Map2k1/Dbnl/Ntn1	8
GO:0043434	GO:0043434	response to peptide hormone	15/368	324/23210	0.000227836	0.0123593	0.0104823	Pparg/Cited1/Atp2b1/Ghr/Pik3r1/Grb10/Ptpre/Kat2b/Pxn/Foxo4/Bcar1/Socs2/Dnaic1/Grk2/Src	15
GO:0001678	GO:0001678	cellular glucose homeostasis	10/368	159/23210	0.000234374	0.0125045	0.0106055	Lepr/Prkce/Map4k4/Arrb1/Pik3r1/Zbtb20/Foxk1/Ptprn2/Hk1/Grk2	10
GO:0010657	GO:0010657	muscle cell apoptotic process	8/368	103/23210	0.000237606	0.0125045	0.0106055	Pparg/Arrb1/Ghrh/Rgl2/Pik3r1/Camk2d/Pdcd4/Grk2	8
GO:0098751	GO:0098751	bone cell development	5/368	36/23210	0.000245363	0.0127228	0.0107907	Rabgap1l/Meis1/Nbeal2/Tjp2/Src	5
GO:0010632	GO:0010632	regulation of epithelial cell migration	12/368	225/23210	0.000268755	0.0137087	0.0116269	Prkce/Map4k4/Pparg/Dock1/Itga3/Prl7d1/Tgfb2/Bcar1/Macf1/Acvrl1/Src/Bcas3	12
GO:1990138	GO:1990138	neuron projection extension	11/368	193/23210	0.000272876	0.0137087	0.0116269	Tmem108/Plxna4/Map1b/Fn1/Sema6a/Dbnl/Ulk2/Ntn1/Wasf1/Rnf157/Sema5b	11
GO:0051893	GO:0051893	regulation of focal adhesion assembly	6/368	57/23210	0.000279929	0.0137087	0.0116269	Ptprj/Map4k4/Macf1/Acvrl1/Src/Bcas3	6
GO:0090109	GO:0090109	regulation of cell-substrate junction assembly	6/368	57/23210	0.000279929	0.0137087	0.0116269	Ptprj/Map4k4/Macf1/Acvrl1/Src/Bcas3	6
GO:0045475	GO:0045475	locomotor rhythm	4/368	21/23210	0.000300544	0.0145167	0.0123121	Lepr/Ncoa2/Zfhx3/Npas2	4
GO:0042593	GO:0042593	glucose homeostasis	13/368	265/23210	0.000340035	0.0162022	0.0137417	Lepr/Prkce/Map4k4/Pparg/Arrb1/Pik3r1/Zbtb20/Foxk1/Ptprn2/Foxo4/Map2k1/Hk1/Grk2	13
GO:0033500	GO:0033500	carbohydrate homeostasis	13/368	266/23210	0.000352497	0.0165721	0.0140554	Lepr/Prkce/Map4k4/Pparg/Arrb1/Pik3r1/Zbtb20/Foxk1/Ptprn2/Foxo4/Map2k1/Hk1/Grk2	13
GO:0010661	GO:0010661	positive regulation of muscle cell apoptotic process	5/368	39/23210	0.000360427	0.0166117	0.014089	Pparg/Arrb1/Camk2d/Pdcd4/Grk2	5
GO:0051043	GO:0051043	regulation of membrane protein ectodomain proteolysis	4/368	22/23210	0.000362762	0.0166117	0.014089	Rgma/Snx9/Pacsin3/Ptpn3	4
GO:0007595	GO:0007595	lactation	6/368	60/23210	0.000371116	0.0167764	0.0142286	Prl2b1/Prl3b1/Prl8a9/Prl7a2/Prl7d1/Socs2	6
GO:1904892	GO:1904892	regulation of STAT cascade	10/368	170/23210	0.000400195	0.0172756	0.0146521	Prl2b1/Prl3b1/Prl8a9/Mgat5/Prl7a2/Ghr/Stra6/Prl7d1/Il6ra/Socs2	10
GO:0048512	GO:0048512	circadian behavior	6/368	61/23210	0.000406177	0.0172756	0.0146521	Lepr/Ncoa2/Zfhx3/Ghrh/Npas2/Csnk1e	6
GO:0038179	GO:0038179	neurotrophin signaling pathway	5/368	40/23210	0.000406613	0.0172756	0.0146521	Tmem108/Lmtk2/Bcar1/Wasf1/Src	5
GO:0060603	GO:0060603	mammary gland duct morphogenesis	5/368	40/23210	0.000406613	0.0172756	0.0146521	Kdm5b/Ncoa3/Ntn1/Fgfr2/Src	5
GO:0034333	GO:0034333	adherens junction assembly	7/368	85/23210	0.000406659	0.0172756	0.0146521	Ptprj/Map4k4/Pxn/Macf1/Acvrl1/Src/Bcas3	7
GO:0007589	GO:0007589	body fluid secretion	8/368	112/23210	0.000420178	0.0176375	0.014959	Prkce/Stk39/Prl2b1/Prl3b1/Prl8a9/Prl7a2/Prl7d1/Socs2	8
GO:0048008	GO:0048008	platelet-derived growth factor receptor signaling pathway	6/368	62/23210	0.00044377	0.0184086	0.015613	Myo1e/Ptprj/Arid5b/Pdgfrb/Bcar1/Src	6
GO:1901652	GO:1901652	response to peptide	16/368	384/23210	0.000459621	0.0188445	0.0159827	App/Pparg/Cited1/Atp2b1/Ghr/Pik3r1/Grb10/Ptpre/Kat2b/Pxn/Foxo4/Bcar1/Socs2/Dnaic1/Grk2/Src	16
GO:0007622	GO:0007622	rhythmic behavior	6/368	63/23210	0.000484022	0.0196168	0.0166377	Lepr/Ncoa2/Zfhx3/Ghrh/Npas2/Csnk1e	6
GO:0007623	GO:0007623	circadian rhythm	11/368	208/23210	0.000514866	0.0206297	0.0174968	Lepr/Ncoa2/Zfhx3/Pparg/Ghrh/Npas2/Nrip1/Kdm5b/Csnk1e/Rora/Noct	11
GO:1903391	GO:1903391	regulation of adherens junction organization	6/368	64/23210	0.00052706	0.0208811	0.01771	Ptprj/Map4k4/Macf1/Acvrl1/Src/Bcas3	6
GO:0010631	GO:0010631	epithelial cell migration	13/368	280/23210	0.000572213	0.022418	0.0190135	Prkce/Map4k4/Pparg/Dock1/Itga3/Pxn/Prl7d1/Tgfb2/Bcar1/Macf1/Acvrl1/Src/Bcas3	13
GO:0001822	GO:0001822	kidney development	13/368	281/23210	0.000591572	0.0227451	0.0192909	Myo1e/Arid5b/Smad1/Cited1/Itga3/Pkd1/Pdgfrb/Stra6/Tgfb2/Lzts2/Il6ra/Sulf2/Fgfr2	13
GO:0098935	GO:0098935	dendritic transport	3/368	11/23210	0.000593463	0.0227451	0.0192909	Kif5c/Wasf1/Stau2	3
GO:0090132	GO:0090132	epithelium migration	13/368	282/23210	0.000611481	0.0231837	0.0196629	Prkce/Map4k4/Pparg/Dock1/Itga3/Pxn/Prl7d1/Tgfb2/Bcar1/Macf1/Acvrl1/Src/Bcas3	13
GO:0007178	GO:0007178	transmembrane receptor protein serine/threonine kinase signaling pathway	15/368	357/23210	0.00063	0.0236317	0.0200429	Smad1/Hivep1/Cited1/Ube2o/Itga3/Rgma/Pxn/Tgfb2/Ing2/Acvr1/Acvrl1/Akap7/Zfp423/Pdcd4/Src	15
GO:0090130	GO:0090130	tissue migration	13/368	284/23210	0.000653001	0.0242366	0.020556	Prkce/Map4k4/Pparg/Dock1/Itga3/Pxn/Prl7d1/Tgfb2/Bcar1/Macf1/Acvrl1/Src/Bcas3	13
GO:0061448	GO:0061448	connective tissue development	13/368	285/23210	0.000674637	0.0244628	0.0207478	4932438A13Rik/Arid5b/Smad1/Mef2d/Pkd1/Gnas/Pdgfrb/Tgfb2/Ddrgk1/Il6ra/Lmna/Sulf2/Bmp1	13
GO:0007259	GO:0007259	JAK-STAT cascade	10/368	182/23210	0.000682345	0.0244628	0.0207478	Prl2b1/Prl3b1/Prl8a9/Prl7a2/Ghr/Pkd1/Stra6/Prl7d1/Il6ra/Socs2	10
GO:0008286	GO:0008286	insulin receptor signaling pathway	8/368	121/23210	0.000703201	0.0244628	0.0207478	Pik3r1/Grb10/Ptpre/Foxo4/Bcar1/Socs2/Dnaic1/Src	8
GO:1900180	GO:1900180	regulation of protein localization to nucleus	8/368	121/23210	0.000703201	0.0244628	0.0207478	Mfhas1/Mdfic/Pik3r1/Tgfb2/Lzts2/Lmna/Pkig/Src	8
GO:0060065	GO:0060065	uterus development	4/368	26/23210	0.00070523	0.0244628	0.0207478	Kdm5b/Stra6/Tgfb2/Src	4
GO:0071526	GO:0071526	semaphorin-plexin signaling pathway	5/368	45/23210	0.000707659	0.0244628	0.0207478	Plxna4/Plxnb1/Sema6a/Farp2/Sema5b	5
GO:1900077	GO:1900077	negative regulation of cellular response to insulin stimulus	5/368	45/23210	0.000707659	0.0244628	0.0207478	Pparg/Grb10/Ptpre/Socs2/Grk2	5
GO:0030099	GO:0030099	myeloid cell differentiation	16/368	401/23210	0.00073164	0.0250463	0.0212426	Rabgap1l/App/Epas1/Pparg/Mitf/Mfhas1/Meis1/Rcor1/Pik3r1/Nbeal2/Meis2/Gnas/Klf13/Farp2/Tjp2/Src	16
GO:0001570	GO:0001570	vasculogenesis	7/368	94/23210	0.000747007	0.0253264	0.0214802	Myo1e/Ptprj/Cited1/Zmiz1/Pdgfrb/Heg1/Fgfr2	7
GO:0005996	GO:0005996	monosaccharide metabolic process	12/368	253/23210	0.000766287	0.0257326	0.0218248	Lepr/Prkce/Ncoa2/Man1c1/Pik3r1/Grb10/Kat2b/Rora/Foxk1/Gpd2/Hk1/Src	12
GO:0048146	GO:0048146	positive regulation of fibroblast proliferation	6/368	69/23210	0.000788725	0.0262363	0.0222519	Fndc3b/Fn1/Kmt2c/Zmiz1/Pdgfrb/Grk2	6
GO:0006109	GO:0006109	regulation of carbohydrate metabolic process	10/368	186/23210	0.000806712	0.0265838	0.0225467	Lepr/Prkce/Ncoa2/App/Grb10/Zbtb20/Kat2b/Rora/Foxk1/Src	10
GO:0062013	GO:0062013	positive regulation of small molecule metabolic process	9/368	155/23210	0.000848178	0.0275393	0.0233571	Prkce/App/Pparg/Dgat1/Zbtb20/Kat2b/Bcl2l1/Map2k1/Src	9
GO:0051057	GO:0051057	positive regulation of small GTPase mediated signal transduction	6/368	70/23210	0.000851328	0.0275393	0.0233571	Map4k4/Arrb1/Pdgfrb/Map2k1/Camk2d/Src	6
GO:0019318	GO:0019318	hexose metabolic process	11/368	223/23210	0.000914966	0.0291265	0.0247032	Lepr/Ncoa2/Man1c1/Pik3r1/Grb10/Kat2b/Rora/Foxk1/Gpd2/Hk1/Src	11
GO:0034332	GO:0034332	adherens junction organization	8/368	126/23210	0.000916915	0.0291265	0.0247032	Ptprj/Map4k4/Cdh24/Pxn/Macf1/Acvrl1/Src/Bcas3	8
GO:0045785	GO:0045785	positive regulation of cell adhesion	16/368	411/23210	0.000948358	0.0298563	0.0253222	Prkce/Ptprj/Zfhx3/Map4k4/Myo10/Fn1/Dock1/Itga3/Zmiz1/Dock8/Tgfb2/Il6ra/Ptpru/Cyth3/Lims2/Src	16
GO:0048568	GO:0048568	embryonic organ development	18/368	493/23210	0.00097359	0.0303795	0.0257659	Cdh23/Epas1/Uty/Cited1/Fbxw8/Lrig1/Med12/Pkd1/Gnas/Pdgfrb/Stra6/Ncoa3/Tgfb2/Map2k1/Acvr1/Ntn1/Fgfr2/Rbbp6	18
GO:0010970	GO:0010970	transport along microtubule	9/368	159/23210	0.00101583	0.0311461	0.0264161	Tmem108/Dst/App/Map1b/Map2k1/Pex14/Kif5c/Wasf1/Stau2	9
GO:0099111	GO:0099111	microtubule-based transport	9/368	159/23210	0.00101583	0.0311461	0.0264161	Tmem108/Dst/App/Map1b/Map2k1/Pex14/Kif5c/Wasf1/Stau2	9
GO:0051145	GO:0051145	smooth muscle cell differentiation	6/368	73/23210	0.00106231	0.0322904	0.0273866	Pdgfrb/Foxo4/Acvr1/Smarca2/Pdcd4/Fgfr2	6
GO:0006006	GO:0006006	glucose metabolic process	10/368	194/23210	0.00111159	0.0332158	0.0281715	Lepr/Ncoa2/Pik3r1/Grb10/Kat2b/Rora/Foxk1/Gpd2/Hk1/Src	10
GO:0030308	GO:0030308	negative regulation of cell growth	10/368	194/23210	0.00111159	0.0332158	0.0281715	Ptprj/Pparg/Rgma/Tgfb2/Sema6a/Acvrl1/Ulk2/Ntn1/Smarca2/Sema5b	10
GO:0072001	GO:0072001	renal system development	13/368	302/23210	0.00114581	0.0339506	0.0287947	Myo1e/Arid5b/Smad1/Cited1/Itga3/Pkd1/Pdgfrb/Stra6/Tgfb2/Lzts2/Il6ra/Sulf2/Fgfr2	13
GO:0032355	GO:0032355	response to estradiol	5/368	51/23210	0.00125913	0.0366918	0.0311196	Ghr/Nrip1/Ncoa3/Socs2/Prdm2	5
GO:0060428	GO:0060428	lung epithelium development	5/368	51/23210	0.00125913	0.0366918	0.0311196	Fndc3b/Insc/Stra6/Map2k1/Fgfr2	5
GO:0070372	GO:0070372	regulation of ERK1 and ERK2 cascade	13/368	306/23210	0.00128965	0.0371428	0.0315022	Flt1/App/Arrb1/Mfhas1/Fn1/Pde8a/Rps6ka6/Pdgfrb/Sema6a/Map2k1/Camk2d/Fgfr2/Src	13
GO:0008088	GO:0008088	axo-dendritic transport	6/368	76/23210	0.00131125	0.0371428	0.0315022	Tmem108/Dst/App/Kif5c/Wasf1/Stau2	6
GO:0007179	GO:0007179	transforming growth factor beta receptor signaling pathway	9/368	165/23210	0.00131675	0.0371428	0.0315022	Smad1/Cited1/Itga3/Pxn/Tgfb2/Ing2/Acvr1/Acvrl1/Src	9
GO:0046425	GO:0046425	regulation of JAK-STAT cascade	9/368	165/23210	0.00131675	0.0371428	0.0315022	Prl2b1/Prl3b1/Prl8a9/Prl7a2/Ghr/Stra6/Prl7d1/Il6ra/Socs2	9
GO:0031346	GO:0031346	positive regulation of cell projection organization	17/368	466/23210	0.00134704	0.0375676	0.0318625	Sept9/Plxna4/Map1b/Fn1/Fbxw8/Itga3/Plxnb1/Snap91/Rgma/Kat2b/Map2k1/Dbnl/Ntn1/Stau2/Rnf157/Src/Bcas3	17
GO:0001655	GO:0001655	urogenital system development	14/368	346/23210	0.00135312	0.0375676	0.0318625	Myo1e/Arid5b/Smad1/Cited1/Itga3/Pkd1/Pdgfrb/Stra6/Tgfb2/Lzts2/Acvr1/Il6ra/Sulf2/Fgfr2	14
GO:0090287	GO:0090287	regulation of cellular response to growth factor stimulus	12/368	271/23210	0.00138289	0.0380944	0.0323092	Tmem108/Flt1/Ube2o/Itga3/Rgma/Grb10/Sema6a/Ing2/Acvrl1/Sulf2/Wasf1/Zfp423	12
GO:0071900	GO:0071900	regulation of protein serine/threonine kinase activity	16/368	427/23210	0.00140777	0.0384791	0.0326355	Stk39/Flt1/Ptprj/Ccnjl/Arrb1/Mdfic/Ghr/Spred2/Pkd1/Pdgfrb/Kat2b/Heg1/Pxn/Map2k1/Pkig/Src	16
GO:0016055	GO:0016055	Wnt signaling pathway	16/368	428/23210	0.00144183	0.0391069	0.0331679	Uty/Mitf/Mdfic/Itga3/Med12/Grb10/Pkd1/Csnk1e/Lzts2/Macf1/Ror1/Ptpru/Spin1/Sulf2/Fgfr2/Src	16
GO:0030509	GO:0030509	BMP signaling pathway	9/368	168/23210	0.00149209	0.0395329	0.0335292	Smad1/Hivep1/Ube2o/Itga3/Rgma/Acvr1/Acvrl1/Zfp423/Pdcd4	9
GO:0009791	GO:0009791	post-embryonic development	8/368	136/23210	0.00149957	0.0395329	0.0335292	Cdh23/Flt1/Myo1e/Arid5b/Kdm5b/Gnas/Heg1/Fgfr2	8
GO:0061515	GO:0061515	myeloid cell development	6/368	78/23210	0.00150042	0.0395329	0.0335292	Rabgap1l/App/Meis1/Nbeal2/Tjp2/Src	6
GO:0198738	GO:0198738	cell-cell signaling by wnt	16/368	430/23210	0.00151203	0.0395329	0.0335292	Uty/Mitf/Mdfic/Itga3/Med12/Grb10/Pkd1/Csnk1e/Lzts2/Macf1/Ror1/Ptpru/Spin1/Sulf2/Fgfr2/Src	16
GO:0048661	GO:0048661	positive regulation of smooth muscle cell proliferation	7/368	106/23210	0.0015136	0.0395329	0.0335292	Mef2d/Foxj2/Pdgfrb/Il6ra/Camk2d/Grk2/Fgfr2	7
GO:0034393	GO:0034393	positive regulation of smooth muscle cell apoptotic process	3/368	15/23210	0.0015612	0.0396436	0.0336232	Pparg/Arrb1/Pdcd4	3
GO:0051044	GO:0051044	positive regulation of membrane protein ectodomain proteolysis	3/368	15/23210	0.0015612	0.0396436	0.0336232	Rgma/Snx9/Pacsin3	3
GO:0048675	GO:0048675	axon extension	8/368	137/23210	0.00157107	0.0396436	0.0336232	Plxna4/Map1b/Fn1/Sema6a/Dbnl/Ulk2/Ntn1/Sema5b	8
GO:1900181	GO:1900181	negative regulation of protein localization to nucleus	4/368	32/23210	0.00157405	0.0396436	0.0336232	Mfhas1/Mdfic/Lzts2/Pkig	4
GO:2001171	GO:2001171	positive regulation of ATP biosynthetic process	4/368	32/23210	0.00157405	0.0396436	0.0336232	App/Zbtb20/Bcl2l1/Map2k1	4
GO:0048145	GO:0048145	regulation of fibroblast proliferation	7/368	107/23210	0.00159796	0.0399603	0.0338918	Pparg/Fndc3b/Fn1/Kmt2c/Zmiz1/Pdgfrb/Grk2	7
GO:0001890	GO:0001890	placenta development	9/368	170/23210	0.00161906	0.0402029	0.0340975	Epas1/Pparg/Cited1/Fbxw8/Hsd17b2/Pkd1/Ncoa3/Map2k1/Fgfr2	9
GO:0030705	GO:0030705	cytoskeleton-dependent intracellular transport	9/368	171/23210	0.00168572	0.0415654	0.0352531	Tmem108/Dst/App/Map1b/Map2k1/Pex14/Kif5c/Wasf1/Stau2	9
GO:0048144	GO:0048144	fibroblast proliferation	7/368	109/23210	0.00177764	0.0435274	0.0369171	Pparg/Fndc3b/Fn1/Kmt2c/Zmiz1/Pdgfrb/Grk2	7
GO:0071559	GO:0071559	response to transforming growth factor beta	10/368	208/23210	0.00186827	0.0454313	0.0385319	Zfhx3/Smad1/Cited1/Itga3/Pxn/Tgfb2/Ing2/Acvr1/Acvrl1/Src	10
GO:0032570	GO:0032570	response to progesterone	3/368	16/23210	0.00189903	0.0457257	0.0387816	Ncoa2/Tgfb2/Src	3
GO:0062012	GO:0062012	regulation of small molecule metabolic process	14/368	359/23210	0.00190632	0.0457257	0.0387816	Lepr/Prkce/Ncoa2/App/Pparg/Dgat1/Grb10/Zbtb20/Kat2b/Rora/Foxk1/Bcl2l1/Map2k1/Src	14
GO:0010976	GO:0010976	positive regulation of neuron projection development	14/368	362/23210	0.00205761	0.047924	0.0406461	Plxna4/Map1b/Fn1/Fbxw8/Itga3/Plxnb1/Snap91/Rgma/Kat2b/Map2k1/Dbnl/Ntn1/Stau2/Rnf157	14
GO:0010634	GO:0010634	positive regulation of epithelial cell migration	8/368	143/23210	0.0020587	0.047924	0.0406461	Prkce/Map4k4/Dock1/Itga3/Tgfb2/Bcar1/Src/Bcas3	8
GO:1901888	GO:1901888	regulation of cell junction assembly	6/368	83/23210	0.0020642	0.047924	0.0406461	Ptprj/Map4k4/Macf1/Acvrl1/Src/Bcas3	6
GO:0001892	GO:0001892	embryonic placenta development	7/368	112/23210	0.00207611	0.047924	0.0406461	Epas1/Cited1/Fbxw8/Pkd1/Ncoa3/Map2k1/Fgfr2	7
GO:0030516	GO:0030516	regulation of axon extension	7/368	112/23210	0.00207611	0.047924	0.0406461	Plxna4/Map1b/Fn1/Sema6a/Dbnl/Ntn1/Sema5b	7
GO:0070371	GO:0070371	ERK1 and ERK2 cascade	13/368	323/23210	0.00207952	0.047924	0.0406461	Flt1/App/Arrb1/Mfhas1/Fn1/Pde8a/Rps6ka6/Pdgfrb/Sema6a/Map2k1/Camk2d/Fgfr2/Src	13
GO:0032147	GO:0032147	activation of protein kinase activity	11/368	248/23210	0.00213287	0.0485294	0.0411595	Stk39/Map4k4/Arrb1/Mdfic/Ghr/Map4k3/Pxn/Tgfb2/Map2k1/Il6ra/Src	11
GO:0007219	GO:0007219	Notch signaling pathway	9/368	177/23210	0.00213331	0.0485294	0.0411595	Maml3/App/Arrb1/Bend6/Zmiz1/Tgfb2/Tspan14/Spen/Zfp423	9
GO:0001952	GO:0001952	regulation of cell-matrix adhesion	7/368	113/23210	0.00218376	0.0493585	0.0418627	Ptprj/Map4k4/Pik3r1/Macf1/Acvrl1/Src/Bcas3	7
GO:1904707	GO:1904707	positive regulation of vascular smooth muscle cell proliferation	4/368	35/23210	0.00220797	0.0494913	0.0419753	Mef2d/Foxj2/Camk2d/Grk2	4
GO:0060443	GO:0060443	mammary gland morphogenesis	5/368	58/23210	0.00224427	0.0494913	0.0419753	Kdm5b/Ncoa3/Ntn1/Fgfr2/Src	5
GO:0009886	GO:0009886	post-embryonic animal morphogenesis	3/368	17/23210	0.00227903	0.0494913	0.0419753	Cdh23/Flt1/Gnas	3
GO:0051895	GO:0051895	negative regulation of focal adhesion assembly	3/368	17/23210	0.00227903	0.0494913	0.0419753	Acvrl1/Src/Bcas3	3
GO:0007548	GO:0007548	sex differentiation	12/368	288/23210	0.00229629	0.0494913	0.0419753	Fndc3a/Arid5b/Arrb1/Hsd17b4/Nrip1/Stra6/Ncoa3/Tgfb2/Ing2/Bcl2l1/Grk2/Src	12
GO:0008406	GO:0008406	gonad development	10/368	214/23210	0.00229965	0.0494913	0.0419753	Fndc3a/Arid5b/Arrb1/Hsd17b4/Nrip1/Tgfb2/Ing2/Bcl2l1/Grk2/Src	10
GO:0071772	GO:0071772	response to BMP	9/368	179/23210	0.00230192	0.0494913	0.0419753	Smad1/Hivep1/Ube2o/Itga3/Rgma/Acvr1/Acvrl1/Zfp423/Pdcd4	9
GO:0071773	GO:0071773	cellular response to BMP stimulus	9/368	179/23210	0.00230192	0.0494913	0.0419753	Smad1/Hivep1/Ube2o/Itga3/Rgma/Acvr1/Acvrl1/Zfp423/Pdcd4	9
