# Supplementary material for: Single nuclei RNA-seq of mouse placental labyrinth development
Source: eLife. 2020 Nov 3;9:e60266. doi: 10.7554/eLife.60266 (PMC7669270; doi:10.7554/eLife.60266)
Supplement: Figure 3—source data 1. [file elife-60266-fig3-data1.xlsx]

## Sheet: velocity_magnitude_cluster_mean
Figure 3 - source data 1 - Average velocity magnitude by timepoint and cluster
	clusters	mean_9_5	median_9_5	std_9_5	mean_10_5	median_10_5	std_10_5	mean_12_5	median_12_5	std_12_5	mean_14_5	median_14_5	std_14_5
1	S-TGC	0.0485029	0.0480688	0.0288762	0.0642634	0.0623432	0.0304276	0.0456942	0.0391362	0.0292076	0.0139539	0.0131655	0.00848351
2	LaTP	0.00989	0.00838552	0.00554399	0.0112544	0.00923246	0.00767592	0.0143122	0.00994919	0.0169721	0.0275797	0.0190335	0.0238983
3	JZP 1	0.0203391	0.0168737	0.0139617	0.042666	0.0361969	0.0264698	0.0254509	0.0217094	0.013986	0.0493965	0.0500774	0.0170133
4	JZP 2	0.0235735	0.0137086	0.0232378	0.060657	0.0602604	0.0361546	0.0372076	0.0300216	0.0263698	0.0488499	0.0484959	0.0175399
5	LaTP2	0.0157969	0.0133728	0.0115073	0.0213417	0.018445	0.0155534	0.0203985	0.0158686	0.0176093	0.0452747	0.0385712	0.0276601
6	SynTI Precursor	0.0242892	0.00748846	0.0389753	0.0548696	0.0243434	0.0578754	0.0377086	0.0189102	0.0397395	0.0189941	0.0118802	0.0172231
7	SynTII Precursor	0.00754818	0.0040037	0.0203203	0.013352	0.00585718	0.0239778	0.0413086	0.0164182	0.0487886	0.0204723	0.0151026	0.0174159
8	S-TGC Precursor	0.0328832	0.0199382	0.0306341	0.053065	0.0370303	0.039691	0.0582107	0.0513379	0.0381384	0.0294933	0.0203655	0.0236904
9	GC	0.0464275	0.0441876	0.028935	0.0742958	0.0789626	0.0307224	0.0335845	0.0324563	0.0196901	0.0393619	0.0391003	0.0162197
10	SynTII	0.0570355	0.0457198	0.0438709	0.0412405	0.0279546	0.0357896	0.0361985	0.0263084	0.0283478	0.0118407	0.00790836	0.0130157
11	SynTI	0.047879	0.0411849	0.0352687	0.0429344	0.0374774	0.0268747	0.0365573	0.0277638	0.0288765	0.0173137	0.0164653	0.00888162
12	SpT Precursor	0.0396117	0.0307594	0.0268765	0.0686763	0.0659375	0.0350864	0.0500185	0.0489267	0.0272323	0.0445362	0.0386469	0.0270274
13	SpT Precursor	NA	NA	NA	0.0759916	0.0773956	0.0419019	0.0340393	0.0295378	0.0208139	0.02327	0.0211185	0.0118689
Units are UMAP distance
