# Supplementary material for: Single nuclei RNA-seq of mouse placental labyrinth development
Source: eLife. 2020 Nov 3;9:e60266. doi: 10.7554/eLife.60266 (PMC7669270; doi:10.7554/eLife.60266)
Supplement: Figure 3—source data 2. [file elife-60266-fig3-data2.csv]

	gene	avg_logFC	comparison
Taco1	Taco1	-2.04878268918354	E9.5 vs E10.5
Gm42418	Gm42418	0.948519703152833	E9.5 vs E10.5
Pappa2	Pappa2	-1.21536215572057	E9.5 vs E10.5
Fnd3c2	Fnd3c2	-1.2062583641407	E9.5 vs E10.5
Prlr	Prlr	1.09293146967443	E9.5 vs E10.5
Inf2	Inf2	-1.05528301122632	E9.5 vs E10.5
Maml3	Maml3	-0.609408916841658	E9.5 vs E10.5
Gulp1	Gulp1	1.21988353870592	E9.5 vs E10.5
Lepr	Lepr	-1.19063092901997	E9.5 vs E10.5
Slc7a1	Slc7a1	-0.709528426902153	E9.5 vs E10.5
Pitpnm2	Pitpnm2	-0.906620364906038	E9.5 vs E10.5
Meg3	Meg3	1.10761368556589	E9.5 vs E10.5
Myo1e	Myo1e	-0.979895830213689	E9.5 vs E10.5
Gphn	Gphn	0.695458623098675	E9.5 vs E10.5
Ncoa2	Ncoa2	-0.952018102236337	E9.5 vs E10.5
Dst	Dst	-0.432199865254046	E9.5 vs E10.5
Prkce	Prkce	-0.523697935835971	E9.5 vs E10.5
Svil	Svil	0.704951403039947	E9.5 vs E10.5
Kcnq1ot1	Kcnq1ot1	0.535665501189593	E9.5 vs E10.5
Fn1	Fn1	-0.530479929562864	E9.5 vs E10.5
Tcf4	Tcf4	0.584036723095458	E9.5 vs E10.5
Afap1l2	Afap1l2	-0.608521517466572	E9.5 vs E10.5
Tsc22d3	Tsc22d3	-1.07982146068211	E9.5 vs E10.5
Nav3	Nav3	0.79506753742841	E9.5 vs E10.5
Camk1d	Camk1d	0.77866857516555	E9.5 vs E10.5
Tcf12	Tcf12	0.412767135620057	E9.5 vs E10.5
Ctdspl	Ctdspl	-0.430713287727611	E9.5 vs E10.5
Man1c1	Man1c1	-0.846324570617143	E9.5 vs E10.5
Ctsq	Ctsq	-1.09905364342428	E9.5 vs E10.5
Rbms1	Rbms1	0.311521142276202	E9.5 vs E10.5
4932438A13Rik	4932438A13Rik	-0.699695747451078	E9.5 vs E10.5
Tnfaip8	Tnfaip8	-0.755273251172029	E9.5 vs E10.5
Mical3	Mical3	-0.626441648665479	E9.5 vs E10.5
Foxn3	Foxn3	-0.827537949410427	E9.5 vs E10.5
Afap1	Afap1	-0.690355340525776	E9.5 vs E10.5
Ctsr	Ctsr	-0.863445622924727	E9.5 vs E10.5
Nkain2	Nkain2	-1.1165073575232	E9.5 vs E10.5
Golgb1	Golgb1	-0.716422091400081	E9.5 vs E10.5
1700025G04Rik	1700025G04Rik	-0.358887908096647	E9.5 vs E10.5
Nr6a1	Nr6a1	0.646571215675924	E9.5 vs E10.5
Sept9	Sept9	-0.706452000492038	E9.5 vs E10.5
Gm44511	Gm44511	-0.594936149365517	E9.5 vs E10.5
Plac1	Plac1	0.606821809088321	E9.5 vs E10.5
Fam214a	Fam214a	-0.78989248321361	E9.5 vs E10.5
Pdgfrb	Pdgfrb	-0.661023307723473	E9.5 vs E10.5
Plekhh1	Plekhh1	-0.614802164479178	E9.5 vs E10.5
Slc45a4	Slc45a4	-0.606683416828026	E9.5 vs E10.5
Xylt1	Xylt1	-0.732099217228257	E9.5 vs E10.5
Plekhg2	Plekhg2	-0.700014495449581	E9.5 vs E10.5
Srgap2	Srgap2	0.454786962035293	E9.5 vs E10.5
Rdm1	Rdm1	-0.721051791235199	E9.5 vs E10.5
Cdk8	Cdk8	0.649284049647549	E9.5 vs E10.5
Cdh23	Cdh23	-0.840832485509336	E9.5 vs E10.5
Caskin1	Caskin1	-0.705751998199722	E9.5 vs E10.5
Arhgef7	Arhgef7	0.694869709180019	E9.5 vs E10.5
AY036118	AY036118	0.589833426909417	E9.5 vs E10.5
Klhl13	Klhl13	0.411023412582129	E9.5 vs E10.5
Vstm4	Vstm4	-0.641503572794938	E9.5 vs E10.5
Mbd6	Mbd6	-0.615508415498597	E9.5 vs E10.5
Fam78b	Fam78b	-0.475597140402735	E9.5 vs E10.5
Satb1	Satb1	0.735273477226355	E9.5 vs E10.5
Ccdc6	Ccdc6	-0.617310792241789	E9.5 vs E10.5
AC118475.1	AC118475.1	-0.687177032162197	E9.5 vs E10.5
Sin3b	Sin3b	-0.496480851300716	E9.5 vs E10.5
Ctsj	Ctsj	-0.62933736287881	E9.5 vs E10.5
Setbp1	Setbp1	-0.681220073371816	E9.5 vs E10.5
Son	Son	-0.418324439190648	E9.5 vs E10.5
Tox2	Tox2	-0.560098016898399	E9.5 vs E10.5
Arid1b	Arid1b	-0.376416246788632	E9.5 vs E10.5
Ube2h	Ube2h	-0.393396301405385	E9.5 vs E10.5
Las1l	Las1l	-0.551022909123085	E9.5 vs E10.5
Phf2	Phf2	-0.557593681351409	E9.5 vs E10.5
Elf1	Elf1	-0.565785600488066	E9.5 vs E10.5
Bach2	Bach2	-0.668056317650605	E9.5 vs E10.5
Parp4	Parp4	-0.527374272507493	E9.5 vs E10.5
Rsrp1	Rsrp1	-0.446418462445404	E9.5 vs E10.5
2810459M11Rik	2810459M11Rik	0.46441428484892	E9.5 vs E10.5
Pde10a	Pde10a	-0.516597987811715	E9.5 vs E10.5
Ipo5	Ipo5	0.585249223690891	E9.5 vs E10.5
Spen	Spen	-0.520463962216171	E9.5 vs E10.5
Mirg	Mirg	0.711486897686815	E9.5 vs E10.5
Dapk1	Dapk1	-0.685716906485952	E9.5 vs E10.5
Itga3	Itga3	-0.633911003251935	E9.5 vs E10.5
Map4k4	Map4k4	-0.455640576345936	E9.5 vs E10.5
Dtx3	Dtx3	-0.579306415024123	E9.5 vs E10.5
Prpf4b	Prpf4b	-0.507696522181468	E9.5 vs E10.5
Ppp2r2c	Ppp2r2c	-0.626484648694676	E9.5 vs E10.5
Chsy1	Chsy1	0.476663830950343	E9.5 vs E10.5
Arhgap8	Arhgap8	-0.558942682440569	E9.5 vs E10.5
Liph	Liph	-0.486752727542208	E9.5 vs E10.5
Myo10	Myo10	-0.373835289762309	E9.5 vs E10.5
Acin1	Acin1	-0.405721574900155	E9.5 vs E10.5
Sdk1	Sdk1	-0.843286210271938	E9.5 vs E10.5
Magi3	Magi3	0.288318198394157	E9.5 vs E10.5
Mtcl1	Mtcl1	-0.436032592720529	E9.5 vs E10.5
Ranbp17	Ranbp17	0.564604100276074	E9.5 vs E10.5
Gm28153	Gm28153	0.644840576562263	E9.5 vs E10.5
Pdlim2	Pdlim2	-0.467931854279704	E9.5 vs E10.5
Wwc1	Wwc1	-0.515110508676859	E9.5 vs E10.5
Gm28285	Gm28285	0.613829440107029	E9.5 vs E10.5
Pxn	Pxn	-0.611486416408044	E9.5 vs E10.5
Zmym5	Zmym5	-0.537890531325812	E9.5 vs E10.5
Faf1	Faf1	0.39708755422932	E9.5 vs E10.5
Pdss1	Pdss1	0.559215719114527	E9.5 vs E10.5
Fam171a1	Fam171a1	0.500307985189881	E9.5 vs E10.5
Tns3	Tns3	-0.459678935529206	E9.5 vs E10.5
Zcchc14	Zcchc14	-0.535822124857672	E9.5 vs E10.5
Il31ra	Il31ra	-0.409053091175187	E9.5 vs E10.5
Nhsl1	Nhsl1	0.581609970702052	E9.5 vs E10.5
Fam90a1b	Fam90a1b	-0.449475146955069	E9.5 vs E10.5
Med13l	Med13l	-0.518075653362098	E9.5 vs E10.5
Wipf1	Wipf1	-0.476232120836984	E9.5 vs E10.5
Slc43a2	Slc43a2	-0.653061188947401	E9.5 vs E10.5
Dlg1	Dlg1	0.40833285832353	E9.5 vs E10.5
Med12l	Med12l	0.773735311418486	E9.5 vs E10.5
Ddx46	Ddx46	-0.501036278124962	E9.5 vs E10.5
Epas1	Epas1	-0.44522232734264	E9.5 vs E10.5
Src	Src	-0.438984627822777	E9.5 vs E10.5
Ghrh	Ghrh	-0.475088447278108	E9.5 vs E10.5
Adarb1	Adarb1	-0.54109772556929	E9.5 vs E10.5
Alpl	Alpl	-0.465405406474303	E9.5 vs E10.5
Prl3b1	Prl3b1	-0.37309748371263	E9.5 vs E10.5
Jmjd1c	Jmjd1c	0.444102077748689	E9.5 vs E10.5
Brwd1	Brwd1	-0.36107993604723	E9.5 vs E10.5
Agap1	Agap1	-0.66635160447575	E9.5 vs E10.5
C2cd2	C2cd2	-0.478564099203395	E9.5 vs E10.5
Ddx5	Ddx5	-0.419139364218244	E9.5 vs E10.5
Fbxo21	Fbxo21	-0.513791964877727	E9.5 vs E10.5
Ncor2	Ncor2	-0.510476950002279	E9.5 vs E10.5
Ptprj	Ptprj	-0.620892779219849	E9.5 vs E10.5
Car5b	Car5b	-0.476695142169324	E9.5 vs E10.5
Kcnk5	Kcnk5	-0.412408794818773	E9.5 vs E10.5
Gna12	Gna12	-0.44848664718922	E9.5 vs E10.5
Ola1	Ola1	0.487969156178297	E9.5 vs E10.5
Pds5b	Pds5b	0.436764800005466	E9.5 vs E10.5
Sct	Sct	-0.46289498857836	E9.5 vs E10.5
Atp9a	Atp9a	-0.465665245160065	E9.5 vs E10.5
Rab6b	Rab6b	-0.462450298475844	E9.5 vs E10.5
Mitf	Mitf	-0.5171892426566	E9.5 vs E10.5
Itga7	Itga7	0.479601363381168	E9.5 vs E10.5
Arhgap26	Arhgap26	-0.612209506935928	E9.5 vs E10.5
Rpl14	Rpl14	0.427871061534566	E9.5 vs E10.5
Atp2c2	Atp2c2	0.463334146918743	E9.5 vs E10.5
Prl2c3	Prl2c3	0.381716524517874	E9.5 vs E10.5
Prtg	Prtg	0.407957401694987	E9.5 vs E10.5
