# Supplementary material for: Single nuclei RNA-seq of mouse placental labyrinth development
Source: eLife. 2020 Nov 3;9:e60266. doi: 10.7554/eLife.60266 (PMC7669270; doi:10.7554/eLife.60266)
Supplement: Figure 3—source data 3. [file elife-60266-fig3-data3.csv]

	gene	avg_logFC	comparison
Xist	Xist	3.8628964926336	E9.5 vs E12.5
Pappa2	Pappa2	-2.18058583922285	E9.5 vs E12.5
Taco1	Taco1	-2.45186026687219	E9.5 vs E12.5
Prkce	Prkce	-1.03907750825886	E9.5 vs E12.5
Mical3	Mical3	-1.45577946415662	E9.5 vs E12.5
Tsc22d3	Tsc22d3	-2.1925386245468	E9.5 vs E12.5
Lepr	Lepr	-2.24019577445864	E9.5 vs E12.5
Ctsq	Ctsq	-2.20008102950961	E9.5 vs E12.5
Fnd3c2	Fnd3c2	-1.83722718702661	E9.5 vs E12.5
Tnfaip8	Tnfaip8	-1.35240196003447	E9.5 vs E12.5
Ncoa2	Ncoa2	-1.43263520153805	E9.5 vs E12.5
Maml3	Maml3	-0.932228431691238	E9.5 vs E12.5
Dst	Dst	-0.701921231715067	E9.5 vs E12.5
Malat1	Malat1	-0.514610746094485	E9.5 vs E12.5
Prlr	Prlr	1.68120542379215	E9.5 vs E12.5
Cdh23	Cdh23	-1.63910087409004	E9.5 vs E12.5
Sept9	Sept9	-1.25926814989785	E9.5 vs E12.5
Nkain2	Nkain2	-1.58438952624814	E9.5 vs E12.5
Slc7a1	Slc7a1	-1.02370784022694	E9.5 vs E12.5
Meg3	Meg3	1.6912810634622	E9.5 vs E12.5
Pde10a	Pde10a	-1.09012847789192	E9.5 vs E12.5
Inf2	Inf2	-1.34962517850906	E9.5 vs E12.5
AC118475.1	AC118475.1	-1.54133372432634	E9.5 vs E12.5
1700025G04Rik	1700025G04Rik	-0.603055773038474	E9.5 vs E12.5
Myo1e	Myo1e	-1.29022131097797	E9.5 vs E12.5
Flt1	Flt1	-1.56728743565858	E9.5 vs E12.5
Pparg	Pparg	-0.896658560445685	E9.5 vs E12.5
Pitpnm2	Pitpnm2	-1.3219558467412	E9.5 vs E12.5
Gm42418	Gm42418	0.60268015648324	E9.5 vs E12.5
Svil	Svil	1.19502051752933	E9.5 vs E12.5
Kazn	Kazn	-1.16706358175716	E9.5 vs E12.5
Epas1	Epas1	-0.901754027914551	E9.5 vs E12.5
Shroom4	Shroom4	-0.929077465274111	E9.5 vs E12.5
Gulp1	Gulp1	1.54987430551992	E9.5 vs E12.5
Tspan9	Tspan9	-1.00200747867745	E9.5 vs E12.5
Gphn	Gphn	0.904967711703263	E9.5 vs E12.5
Diaph3	Diaph3	1.04593833308474	E9.5 vs E12.5
Plac1	Plac1	1.17374602431931	E9.5 vs E12.5
Afap1l2	Afap1l2	-0.853001118326767	E9.5 vs E12.5
Arid1b	Arid1b	-0.801809042360408	E9.5 vs E12.5
Fam78b	Fam78b	-0.897245078231344	E9.5 vs E12.5
4932438A13Rik	4932438A13Rik	-1.00362564919286	E9.5 vs E12.5
Park2	Park2	-1.39534557020107	E9.5 vs E12.5
Mitf	Mitf	-1.11414683777742	E9.5 vs E12.5
Man1c1	Man1c1	-1.25367919011204	E9.5 vs E12.5
Btbd11	Btbd11	1.2454353915298	E9.5 vs E12.5
Phf8	Phf8	-1.19720091454809	E9.5 vs E12.5
Rin2	Rin2	-1.18393568518562	E9.5 vs E12.5
App	App	-0.791092417737588	E9.5 vs E12.5
Srgap2	Srgap2	0.838509720377261	E9.5 vs E12.5
Itga7	Itga7	0.988251056493987	E9.5 vs E12.5
Fndc3a	Fndc3a	-1.09776181320683	E9.5 vs E12.5
C2cd2	C2cd2	-1.11167203178669	E9.5 vs E12.5
Gng12	Gng12	-0.581822855923615	E9.5 vs E12.5
Rabgap1l	Rabgap1l	-1.15447082932532	E9.5 vs E12.5
Arhgap31	Arhgap31	-0.655282472817295	E9.5 vs E12.5
Fhit	Fhit	-1.30551093668287	E9.5 vs E12.5
Dapk1	Dapk1	-0.996994859469551	E9.5 vs E12.5
Mtcl1	Mtcl1	-0.951918190710053	E9.5 vs E12.5
Elf1	Elf1	-0.991808358269744	E9.5 vs E12.5
Sgms1	Sgms1	-0.857378060677478	E9.5 vs E12.5
Dock8	Dock8	-0.733861367415964	E9.5 vs E12.5
Tsix	Tsix	0.985665531563627	E9.5 vs E12.5
Fn1	Fn1	-0.629754119466658	E9.5 vs E12.5
Prl2b1	Prl2b1	-1.05850177335517	E9.5 vs E12.5
Ddx46	Ddx46	-0.815955058918586	E9.5 vs E12.5
Ogt	Ogt	0.941664334411327	E9.5 vs E12.5
Mid1	Mid1	0.931359005856881	E9.5 vs E12.5
Map4k4	Map4k4	-0.769492803594744	E9.5 vs E12.5
Stk39	Stk39	-1.1341613713581	E9.5 vs E12.5
Ube2h	Ube2h	-0.58868740485849	E9.5 vs E12.5
Zmiz1	Zmiz1	-0.82659881764836	E9.5 vs E12.5
Psd3	Psd3	-0.744963835271373	E9.5 vs E12.5
Bach2	Bach2	-1.03793291880236	E9.5 vs E12.5
Ranbp17	Ranbp17	1.05134675877688	E9.5 vs E12.5
Kcnq1ot1	Kcnq1ot1	0.596699590175172	E9.5 vs E12.5
Fndc3b	Fndc3b	-0.58902940242619	E9.5 vs E12.5
Slc45a4	Slc45a4	-0.873531519972954	E9.5 vs E12.5
Ipo5	Ipo5	0.865724789639021	E9.5 vs E12.5
Mthfd1l	Mthfd1l	1.01836479330363	E9.5 vs E12.5
Chn2	Chn2	-0.937574073651081	E9.5 vs E12.5
Fam214a	Fam214a	-1.11030316601825	E9.5 vs E12.5
Prune2	Prune2	0.972866546127783	E9.5 vs E12.5
Igf2bp2	Igf2bp2	1.01567316410976	E9.5 vs E12.5
Nav3	Nav3	0.89629719883106	E9.5 vs E12.5
Pds5b	Pds5b	0.889405277831126	E9.5 vs E12.5
Ctdspl	Ctdspl	-0.521399849173782	E9.5 vs E12.5
Fbxo21	Fbxo21	-0.913653239794933	E9.5 vs E12.5
Zfp608	Zfp608	1.04031696618266	E9.5 vs E12.5
Tmem108	Tmem108	-1.36944786441188	E9.5 vs E12.5
2900026A02Rik	2900026A02Rik	-0.739774067603141	E9.5 vs E12.5
Tacc2	Tacc2	-0.845930191452451	E9.5 vs E12.5
Tmeff1	Tmeff1	0.854106693710333	E9.5 vs E12.5
Ptprj	Ptprj	-1.02996459623592	E9.5 vs E12.5
Nr6a1	Nr6a1	0.79832409088393	E9.5 vs E12.5
Herc4	Herc4	-0.656945842104389	E9.5 vs E12.5
Mef2d	Mef2d	-0.793253701267831	E9.5 vs E12.5
Med13l	Med13l	-0.804411226022521	E9.5 vs E12.5
Uty	Uty	-0.927725466893123	E9.5 vs E12.5
Myo10	Myo10	-0.578506049020279	E9.5 vs E12.5
Cyth1	Cyth1	-0.888310316254763	E9.5 vs E12.5
Adarb1	Adarb1	-0.970070613395119	E9.5 vs E12.5
Foxn3	Foxn3	-0.850426673073132	E9.5 vs E12.5
Smc4	Smc4	0.841114160764336	E9.5 vs E12.5
Vstm4	Vstm4	-0.877670427717399	E9.5 vs E12.5
Caskin1	Caskin1	-0.838095924740021	E9.5 vs E12.5
Gm28285	Gm28285	0.920560708662012	E9.5 vs E12.5
Ctsj	Ctsj	-0.936670437787333	E9.5 vs E12.5
Nsd3	Nsd3	-0.575632464616507	E9.5 vs E12.5
Afap1	Afap1	-0.800222723052349	E9.5 vs E12.5
Tcf4	Tcf4	0.604997785979343	E9.5 vs E12.5
Eif2s3x	Eif2s3x	0.800422735196278	E9.5 vs E12.5
Magi3	Magi3	0.523497998765606	E9.5 vs E12.5
Dock1	Dock1	-0.85565064876971	E9.5 vs E12.5
Cts3	Cts3	-0.809846480509141	E9.5 vs E12.5
Pik3r1	Pik3r1	-0.719573904037838	E9.5 vs E12.5
Ctif	Ctif	-1.1268545038254	E9.5 vs E12.5
Cep350	Cep350	-0.725242217968595	E9.5 vs E12.5
Arhgap26	Arhgap26	-1.06445014124386	E9.5 vs E12.5
Fbxw8	Fbxw8	-0.650815592643012	E9.5 vs E12.5
Pdlim1	Pdlim1	-0.769085686027341	E9.5 vs E12.5
Rbms1	Rbms1	0.317205589347808	E9.5 vs E12.5
Etv6	Etv6	-0.810896068539842	E9.5 vs E12.5
Med12l	Med12l	1.20468315450214	E9.5 vs E12.5
Daam1	Daam1	-0.561343399053031	E9.5 vs E12.5
Ppp2r2c	Ppp2r2c	-0.929109173410762	E9.5 vs E12.5
Efr3b	Efr3b	-0.918369674315118	E9.5 vs E12.5
Nhsl1	Nhsl1	0.961305299387846	E9.5 vs E12.5
Arhgef7	Arhgef7	0.921037243788643	E9.5 vs E12.5
Nrip1	Nrip1	-0.517167051667241	E9.5 vs E12.5
Lmnb1	Lmnb1	0.750449595673094	E9.5 vs E12.5
Sfmbt2	Sfmbt2	0.402782293478847	E9.5 vs E12.5
Lmbr1	Lmbr1	-0.821394830844934	E9.5 vs E12.5
Rassf3	Rassf3	-0.945828173943957	E9.5 vs E12.5
Gm28153	Gm28153	0.919190086932979	E9.5 vs E12.5
Tpbpa	Tpbpa	-0.856770984219766	E9.5 vs E12.5
Snx25	Snx25	0.770584340950924	E9.5 vs E12.5
Wwc1	Wwc1	-0.749778435441836	E9.5 vs E12.5
Kat6b	Kat6b	0.683696857245909	E9.5 vs E12.5
Mms22l	Mms22l	0.892301573374637	E9.5 vs E12.5
Chsy1	Chsy1	0.679547448806755	E9.5 vs E12.5
Zzef1	Zzef1	-0.713781921972231	E9.5 vs E12.5
Mirg	Mirg	0.860471761636406	E9.5 vs E12.5
Hells	Hells	0.75229384360273	E9.5 vs E12.5
Klf13	Klf13	-0.586980200726855	E9.5 vs E12.5
Tcf12	Tcf12	0.402557403474929	E9.5 vs E12.5
Lnx2	Lnx2	-0.886534713556243	E9.5 vs E12.5
Liph	Liph	-0.726551297902825	E9.5 vs E12.5
Ghrh	Ghrh	-0.943822449941486	E9.5 vs E12.5
Parp4	Parp4	-0.689514878207614	E9.5 vs E12.5
Inpp4a	Inpp4a	-0.853161597351696	E9.5 vs E12.5
Meis2	Meis2	-1.06314866439813	E9.5 vs E12.5
Stk10	Stk10	0.807954239462928	E9.5 vs E12.5
Car5b	Car5b	-0.746177672905614	E9.5 vs E12.5
2810459M11Rik	2810459M11Rik	0.64599019278124	E9.5 vs E12.5
Arhgef11	Arhgef11	-0.670357854197828	E9.5 vs E12.5
A630089N07Rik	A630089N07Rik	0.841903073440184	E9.5 vs E12.5
Mast4	Mast4	-1.03920296378091	E9.5 vs E12.5
Prl8a9	Prl8a9	-0.752079242114537	E9.5 vs E12.5
Plekha6	Plekha6	-0.667438898058432	E9.5 vs E12.5
Dock5	Dock5	-0.424979889306254	E9.5 vs E12.5
Rtn4	Rtn4	0.814656526678997	E9.5 vs E12.5
Ccdc6	Ccdc6	-0.839847565653547	E9.5 vs E12.5
Mfhas1	Mfhas1	-0.759140548825511	E9.5 vs E12.5
Alpl	Alpl	-0.83771718993701	E9.5 vs E12.5
Ccnjl	Ccnjl	-0.749615547630741	E9.5 vs E12.5
Pde8a	Pde8a	-0.966218148065477	E9.5 vs E12.5
Hsd17b4	Hsd17b4	-0.724633259085075	E9.5 vs E12.5
Map1b	Map1b	-0.70212482920842	E9.5 vs E12.5
Glis1	Glis1	-0.840409666017643	E9.5 vs E12.5
Lmtk2	Lmtk2	-0.802455759780394	E9.5 vs E12.5
Arhgap8	Arhgap8	-0.843296220052492	E9.5 vs E12.5
Ptprg	Ptprg	0.898732228614503	E9.5 vs E12.5
Arrb1	Arrb1	-0.804426529899111	E9.5 vs E12.5
Snx9	Snx9	-0.605065954778582	E9.5 vs E12.5
Tns3	Tns3	-0.658785222239668	E9.5 vs E12.5
Enah	Enah	0.780443947735589	E9.5 vs E12.5
Fmnl3	Fmnl3	-0.848893848652796	E9.5 vs E12.5
Las1l	Las1l	-0.601311774336321	E9.5 vs E12.5
Mum1l1	Mum1l1	-0.676309060581645	E9.5 vs E12.5
Cdh4	Cdh4	0.827057121989446	E9.5 vs E12.5
Pola1	Pola1	0.954632056567501	E9.5 vs E12.5
Prl3b1	Prl3b1	-0.99914167529284	E9.5 vs E12.5
Plxna4	Plxna4	-1.18209493040163	E9.5 vs E12.5
Snx5	Snx5	0.739445558085261	E9.5 vs E12.5
Rif1	Rif1	0.777859428223694	E9.5 vs E12.5
Pdss1	Pdss1	0.650652831807792	E9.5 vs E12.5
Arhgef6	Arhgef6	-0.507853600303542	E9.5 vs E12.5
Gmds	Gmds	-0.65968468115546	E9.5 vs E12.5
Pwwp2a	Pwwp2a	0.54994598039903	E9.5 vs E12.5
Cdca2	Cdca2	0.650779077806066	E9.5 vs E12.5
Polq	Polq	0.611212337449639	E9.5 vs E12.5
AY036118	AY036118	0.667637332532619	E9.5 vs E12.5
Dapk2	Dapk2	-0.863544575951002	E9.5 vs E12.5
Gm44511	Gm44511	-0.631920765163491	E9.5 vs E12.5
Cxxc5	Cxxc5	-0.684803727482247	E9.5 vs E12.5
Pcgf5	Pcgf5	-0.579929353152474	E9.5 vs E12.5
Gpr137b	Gpr137b	-0.659094405048994	E9.5 vs E12.5
Tmcc3	Tmcc3	-0.72200945390294	E9.5 vs E12.5
Mki67	Mki67	0.676724380896905	E9.5 vs E12.5
Tpm1	Tpm1	0.804873089998452	E9.5 vs E12.5
Mid2	Mid2	-0.598508449447876	E9.5 vs E12.5
Gm19951	Gm19951	0.674710100162047	E9.5 vs E12.5
Fam90a1b	Fam90a1b	-0.659266763708311	E9.5 vs E12.5
Bcor	Bcor	0.813158264933646	E9.5 vs E12.5
Gramd1b	Gramd1b	-0.815846702790433	E9.5 vs E12.5
Slf1	Slf1	0.704030557960916	E9.5 vs E12.5
Snhg11	Snhg11	0.554500558498453	E9.5 vs E12.5
Hectd4	Hectd4	-0.593334527190488	E9.5 vs E12.5
Thada	Thada	0.679004723669927	E9.5 vs E12.5
Ncoa7	Ncoa7	-0.742118557146413	E9.5 vs E12.5
Chd4	Chd4	0.630613987699288	E9.5 vs E12.5
Cdk8	Cdk8	0.656835980732236	E9.5 vs E12.5
Gnas	Gnas	-0.543421479792928	E9.5 vs E12.5
Tox2	Tox2	-0.795718662224596	E9.5 vs E12.5
Gm26561	Gm26561	0.627815301475842	E9.5 vs E12.5
Clasp2	Clasp2	0.649210679951702	E9.5 vs E12.5
Dock9	Dock9	-0.374808792777323	E9.5 vs E12.5
Xpo1	Xpo1	0.655942541475998	E9.5 vs E12.5
Frk	Frk	0.776276252372148	E9.5 vs E12.5
Rcor1	Rcor1	-0.536781885809606	E9.5 vs E12.5
Ulk2	Ulk2	-0.71595627388237	E9.5 vs E12.5
Lars2	Lars2	0.664070890705438	E9.5 vs E12.5
Xpo7	Xpo7	0.615248411723891	E9.5 vs E12.5
Arid5b	Arid5b	-0.51306703326406	E9.5 vs E12.5
Itga3	Itga3	-0.708321839873069	E9.5 vs E12.5
Top2a	Top2a	0.62078325157612	E9.5 vs E12.5
AW554918	AW554918	0.68468238687789	E9.5 vs E12.5
Camk1d	Camk1d	0.593540070918849	E9.5 vs E12.5
Ddx3y	Ddx3y	-0.437622710004869	E9.5 vs E12.5
Fam46a	Fam46a	-0.559924746472077	E9.5 vs E12.5
Cep128	Cep128	0.641241442960201	E9.5 vs E12.5
Scube1	Scube1	0.788516012472056	E9.5 vs E12.5
Atp9a	Atp9a	-0.593488162433991	E9.5 vs E12.5
Uevld	Uevld	-0.588794072262078	E9.5 vs E12.5
Hivep1	Hivep1	-0.772163391761946	E9.5 vs E12.5
Mprip	Mprip	-0.496466379666079	E9.5 vs E12.5
Ppard	Ppard	0.480419674158021	E9.5 vs E12.5
Git2	Git2	-0.53715009082126	E9.5 vs E12.5
Insc	Insc	-0.804737037062096	E9.5 vs E12.5
Proser2	Proser2	-0.63309004400098	E9.5 vs E12.5
Plekhh1	Plekhh1	-0.509738128416978	E9.5 vs E12.5
Pde7a	Pde7a	0.709215615513856	E9.5 vs E12.5
Plekhh2	Plekhh2	0.759859199221526	E9.5 vs E12.5
Hspa8	Hspa8	0.691791381276506	E9.5 vs E12.5
Hivep2	Hivep2	-0.780446187353808	E9.5 vs E12.5
Wwc2	Wwc2	0.641616919958054	E9.5 vs E12.5
Kdm5b	Kdm5b	-0.671541610214526	E9.5 vs E12.5
Cmtm8	Cmtm8	0.614739246826357	E9.5 vs E12.5
Tnfrsf9	Tnfrsf9	-0.695111994424794	E9.5 vs E12.5
Gramd4	Gramd4	-0.626777189652976	E9.5 vs E12.5
Drosha	Drosha	0.572445211425881	E9.5 vs E12.5
Pabpc1	Pabpc1	0.611589186917663	E9.5 vs E12.5
Chst9	Chst9	-0.928219018593764	E9.5 vs E12.5
Acaca	Acaca	0.657955479061499	E9.5 vs E12.5
Cgnl1	Cgnl1	-0.55786773867525	E9.5 vs E12.5
Dtna	Dtna	-0.575163955893861	E9.5 vs E12.5
Gatm	Gatm	-0.675977844886069	E9.5 vs E12.5
Cux1	Cux1	-0.645805786902045	E9.5 vs E12.5
Fbxl20	Fbxl20	-0.519992903681237	E9.5 vs E12.5
Catspere2	Catspere2	-0.589292540038054	E9.5 vs E12.5
Ppfibp2	Ppfibp2	-0.573411700650273	E9.5 vs E12.5
Dpf3	Dpf3	-0.447990177567578	E9.5 vs E12.5
Spred2	Spred2	-0.576940177918213	E9.5 vs E12.5
Zmat1	Zmat1	-0.623944613566653	E9.5 vs E12.5
Ikzf2	Ikzf2	-0.516146766362825	E9.5 vs E12.5
Golgb1	Golgb1	-0.623473833810503	E9.5 vs E12.5
Spen	Spen	-0.558704405312727	E9.5 vs E12.5
Acox1	Acox1	-0.580867909869864	E9.5 vs E12.5
Paxip1	Paxip1	0.480551890027648	E9.5 vs E12.5
Ccny	Ccny	-0.538034194187704	E9.5 vs E12.5
Mad1l1	Mad1l1	0.550670673626608	E9.5 vs E12.5
Srgap1	Srgap1	0.621219298667063	E9.5 vs E12.5
Dlg1	Dlg1	0.575516250335817	E9.5 vs E12.5
Sdk1	Sdk1	-0.809046911679372	E9.5 vs E12.5
Prl7a2	Prl7a2	-0.569465840224712	E9.5 vs E12.5
Dlgap4	Dlgap4	-0.606890428669876	E9.5 vs E12.5
Gna12	Gna12	-0.626060752224081	E9.5 vs E12.5
Arhgef10	Arhgef10	-0.621412146914361	E9.5 vs E12.5
Rpl41	Rpl41	0.602530254471209	E9.5 vs E12.5
D5Ertd579e	D5Ertd579e	-0.576412806964956	E9.5 vs E12.5
Nsd2	Nsd2	0.5481954664822	E9.5 vs E12.5
Fam49a	Fam49a	0.555857102234472	E9.5 vs E12.5
Ammecr1	Ammecr1	-0.630487094471629	E9.5 vs E12.5
Cspp1	Cspp1	0.610169772622202	E9.5 vs E12.5
Srgap3	Srgap3	-0.499754075109777	E9.5 vs E12.5
Rgs5	Rgs5	-0.59895125579041	E9.5 vs E12.5
Flvcr2	Flvcr2	-0.659761813127018	E9.5 vs E12.5
Slc25a13	Slc25a13	0.732850156507356	E9.5 vs E12.5
Nhs	Nhs	0.728790898746521	E9.5 vs E12.5
Dgat1	Dgat1	-0.617534773794028	E9.5 vs E12.5
Kif20b	Kif20b	0.606580860279319	E9.5 vs E12.5
Satb1	Satb1	0.701593683702464	E9.5 vs E12.5
Rbm39	Rbm39	0.378249154273574	E9.5 vs E12.5
Atp2a2	Atp2a2	0.536364224949774	E9.5 vs E12.5
2700038G22Rik	2700038G22Rik	0.474793234950942	E9.5 vs E12.5
Hspd1	Hspd1	0.650559534622056	E9.5 vs E12.5
Meis1	Meis1	-0.685429665929159	E9.5 vs E12.5
Ezh2	Ezh2	0.667979702216541	E9.5 vs E12.5
Nolc1	Nolc1	0.542700370195806	E9.5 vs E12.5
Brd1	Brd1	-0.493797531679592	E9.5 vs E12.5
Pdgfrb	Pdgfrb	-0.602759889294313	E9.5 vs E12.5
Tyms	Tyms	0.631907070644371	E9.5 vs E12.5
Wdr89	Wdr89	0.55741645239458	E9.5 vs E12.5
Nop56	Nop56	0.591823878483591	E9.5 vs E12.5
Fubp1	Fubp1	0.540955664008681	E9.5 vs E12.5
Eif4g3	Eif4g3	0.640037450138926	E9.5 vs E12.5
2610035D17Rik	2610035D17Rik	-0.663989500375258	E9.5 vs E12.5
Pdia5	Pdia5	-0.705958658734895	E9.5 vs E12.5
Utrn	Utrn	0.644198677186689	E9.5 vs E12.5
Matr3	Matr3	0.561631476754493	E9.5 vs E12.5
Platr4	Platr4	0.564352656545112	E9.5 vs E12.5
Fbxo36	Fbxo36	-0.642692961215297	E9.5 vs E12.5
Gm26917	Gm26917	0.326078613516486	E9.5 vs E12.5
Mdn1	Mdn1	0.600197932716473	E9.5 vs E12.5
Ube2o	Ube2o	-0.506826095235437	E9.5 vs E12.5
Mat2a	Mat2a	0.58919708513677	E9.5 vs E12.5
Ncapg2	Ncapg2	0.532058678003878	E9.5 vs E12.5
Setbp1	Setbp1	-0.572051466313117	E9.5 vs E12.5
Hsd17b2	Hsd17b2	-0.713449366892211	E9.5 vs E12.5
Myo18a	Myo18a	-0.475501917974224	E9.5 vs E12.5
Il6ra	Il6ra	-0.530246108132628	E9.5 vs E12.5
Bend6	Bend6	-0.694205658209684	E9.5 vs E12.5
Tmem266	Tmem266	0.683155087745152	E9.5 vs E12.5
Tubb5	Tubb5	0.525086846295379	E9.5 vs E12.5
Eif4b	Eif4b	0.558226461860569	E9.5 vs E12.5
Slc44a2	Slc44a2	0.50028564313681	E9.5 vs E12.5
Arhgap28	Arhgap28	-0.415362761392351	E9.5 vs E12.5
Sept11	Sept11	0.550802183550568	E9.5 vs E12.5
Naa15	Naa15	0.557604033936144	E9.5 vs E12.5
Xpo4	Xpo4	0.547586642416964	E9.5 vs E12.5
Large1	Large1	0.749501576925785	E9.5 vs E12.5
Fam135a	Fam135a	0.66293739037089	E9.5 vs E12.5
Pole	Pole	0.506696363821073	E9.5 vs E12.5
Cit	Cit	0.582427779092108	E9.5 vs E12.5
Sorbs2	Sorbs2	-0.477819683551762	E9.5 vs E12.5
Hat1	Hat1	0.563303545001246	E9.5 vs E12.5
Elf4	Elf4	0.686451961531113	E9.5 vs E12.5
Bbx	Bbx	-0.268462152735867	E9.5 vs E12.5
Zbtb20	Zbtb20	-0.634320587859119	E9.5 vs E12.5
Actb	Actb	0.571454523626179	E9.5 vs E12.5
Lyn	Lyn	0.642016318170665	E9.5 vs E12.5
D630045J12Rik	D630045J12Rik	0.744019868510037	E9.5 vs E12.5
Ftx	Ftx	0.614785950809787	E9.5 vs E12.5
Mb21d2	Mb21d2	0.622713539514513	E9.5 vs E12.5
Ppfibp1	Ppfibp1	-0.535192463865955	E9.5 vs E12.5
Mdfic	Mdfic	-0.72828653851628	E9.5 vs E12.5
Spata5	Spata5	0.516168292187532	E9.5 vs E12.5
Ube2e2	Ube2e2	-0.65996949802586	E9.5 vs E12.5
Pxn	Pxn	-0.711282312687524	E9.5 vs E12.5
Chchd3	Chchd3	0.549791653654234	E9.5 vs E12.5
Plekhg1	Plekhg1	-0.456315643095145	E9.5 vs E12.5
Sec14l1	Sec14l1	-0.680179867207287	E9.5 vs E12.5
Tceanc	Tceanc	-0.603072399426936	E9.5 vs E12.5
Dnaic1	Dnaic1	-0.534126684720067	E9.5 vs E12.5
Hbb-bh1	Hbb-bh1	0.434510883840613	E9.5 vs E12.5
Eif2s3y	Eif2s3y	-0.445445541911182	E9.5 vs E12.5
Gsn	Gsn	0.608678435816263	E9.5 vs E12.5
Map2k1	Map2k1	-0.502176966351779	E9.5 vs E12.5
Agpat4	Agpat4	0.566380429981213	E9.5 vs E12.5
Csgalnact1	Csgalnact1	0.432724156531942	E9.5 vs E12.5
Arhgef1	Arhgef1	-0.624890466304468	E9.5 vs E12.5
Ola1	Ola1	0.616145824475268	E9.5 vs E12.5
Galnt7	Galnt7	0.553851186854886	E9.5 vs E12.5
Asap1	Asap1	0.491756925474465	E9.5 vs E12.5
Larp1	Larp1	0.606613227223236	E9.5 vs E12.5
Zfhx3	Zfhx3	-0.732424954064496	E9.5 vs E12.5
Pbx3	Pbx3	0.664928962329272	E9.5 vs E12.5
Topbp1	Topbp1	0.58624218671141	E9.5 vs E12.5
Atp1b1	Atp1b1	0.549440888479894	E9.5 vs E12.5
Wscd2	Wscd2	0.498741326078889	E9.5 vs E12.5
Klhl13	Klhl13	0.393997897013723	E9.5 vs E12.5
Mthfd1	Mthfd1	0.566618412788361	E9.5 vs E12.5
Kif11	Kif11	0.59346968980251	E9.5 vs E12.5
Kat2b	Kat2b	-0.604916322780314	E9.5 vs E12.5
Kmt2c	Kmt2c	-0.490775378895251	E9.5 vs E12.5
Ehmt1	Ehmt1	0.504114239632888	E9.5 vs E12.5
Tpx2	Tpx2	0.560940823296964	E9.5 vs E12.5
Adk	Adk	0.733942644667912	E9.5 vs E12.5
Eva1c	Eva1c	-0.423621479383283	E9.5 vs E12.5
Pola2	Pola2	0.483084208334972	E9.5 vs E12.5
Atp6v0a1	Atp6v0a1	-0.672831869663812	E9.5 vs E12.5
Utp20	Utp20	0.562204576838331	E9.5 vs E12.5
2810403A07Rik	2810403A07Rik	0.43921519195449	E9.5 vs E12.5
B830012L14Rik	B830012L14Rik	0.435924931322456	E9.5 vs E12.5
Adap1	Adap1	0.421073094793379	E9.5 vs E12.5
Ctsr	Ctsr	-0.531710671176568	E9.5 vs E12.5
Pdlim2	Pdlim2	-0.433210309442623	E9.5 vs E12.5
Dnm2	Dnm2	-0.435601785123486	E9.5 vs E12.5
Pag1	Pag1	-0.524902784145792	E9.5 vs E12.5
Rab6b	Rab6b	-0.584846679517275	E9.5 vs E12.5
Atg4c	Atg4c	-0.578785387876573	E9.5 vs E12.5
Cenpp	Cenpp	0.697734684857371	E9.5 vs E12.5
Psmd14	Psmd14	0.574365471510472	E9.5 vs E12.5
Npm1	Npm1	0.606194606044157	E9.5 vs E12.5
Esyt3	Esyt3	0.492572252028113	E9.5 vs E12.5
Eef1a1	Eef1a1	0.569132832843192	E9.5 vs E12.5
Ptpn4	Ptpn4	0.589730207193217	E9.5 vs E12.5
Pik3c2b	Pik3c2b	-0.611958553752421	E9.5 vs E12.5
Blm	Blm	0.599102017112306	E9.5 vs E12.5
Atp2b1	Atp2b1	-0.435068873486815	E9.5 vs E12.5
Afdn	Afdn	-0.404773261205267	E9.5 vs E12.5
Nt5c2	Nt5c2	-0.643891904664715	E9.5 vs E12.5
Tnrc6c	Tnrc6c	0.608065238510856	E9.5 vs E12.5
Atp2c2	Atp2c2	0.50137471196632	E9.5 vs E12.5
Ksr1	Ksr1	0.639976401011851	E9.5 vs E12.5
Smad7	Smad7	0.575821452347928	E9.5 vs E12.5
Sipa1l2	Sipa1l2	-0.623981925278786	E9.5 vs E12.5
Eif4e	Eif4e	0.614564324703847	E9.5 vs E12.5
Heg1	Heg1	-0.56574506043142	E9.5 vs E12.5
Atad2	Atad2	0.686296832507081	E9.5 vs E12.5
Kpnb1	Kpnb1	0.51450625059411	E9.5 vs E12.5
Snrnp48	Snrnp48	0.653162838613202	E9.5 vs E12.5
A4galt	A4galt	0.660743117214651	E9.5 vs E12.5
8030462N17Rik	8030462N17Rik	0.484848002578724	E9.5 vs E12.5
Ankrd33b	Ankrd33b	-0.55899236671746	E9.5 vs E12.5
Fanca	Fanca	0.577519085716729	E9.5 vs E12.5
Exo1	Exo1	0.458735265151303	E9.5 vs E12.5
Cdk17	Cdk17	-0.498160946059259	E9.5 vs E12.5
Fer	Fer	0.510461089460295	E9.5 vs E12.5
Rps9	Rps9	0.572120745450699	E9.5 vs E12.5
Slc43a2	Slc43a2	-0.660869416884478	E9.5 vs E12.5
Hmgb2	Hmgb2	0.480671325039805	E9.5 vs E12.5
Jdp2	Jdp2	-0.525542667147269	E9.5 vs E12.5
Pbx1	Pbx1	-0.743483532929258	E9.5 vs E12.5
Gata3	Gata3	0.542158470151692	E9.5 vs E12.5
Sall4	Sall4	0.391027062932397	E9.5 vs E12.5
Ceacam14	Ceacam14	-0.424775765048554	E9.5 vs E12.5
Taf1	Taf1	0.601532670589738	E9.5 vs E12.5
Ptprs	Ptprs	0.423225674962686	E9.5 vs E12.5
Suclg2	Suclg2	0.548489991532296	E9.5 vs E12.5
Kif1b	Kif1b	0.60963851902197	E9.5 vs E12.5
Clip2	Clip2	-0.359821255898513	E9.5 vs E12.5
Itpr3	Itpr3	0.412133217600678	E9.5 vs E12.5
Nav2	Nav2	0.64866650795785	E9.5 vs E12.5
Ptpre	Ptpre	-0.686223037506699	E9.5 vs E12.5
Pkp4	Pkp4	-0.598813132861982	E9.5 vs E12.5
Slc4a7	Slc4a7	0.472884566708279	E9.5 vs E12.5
Ptprk	Ptprk	0.754040100892793	E9.5 vs E12.5
Clspn	Clspn	0.533846541538587	E9.5 vs E12.5
Elf5	Elf5	0.322735161154146	E9.5 vs E12.5
