# Supplementary material for: Single nuclei RNA-seq of mouse placental labyrinth development
Source: eLife. 2020 Nov 3;9:e60266. doi: 10.7554/eLife.60266 (PMC7669270; doi:10.7554/eLife.60266)
Supplement: Figure 3—source data 4. [file elife-60266-fig3-data4.csv]

	gene	avg_logFC	comparison
Ctsq	Ctsq	-3.70719053691501	E9.5 vs E14.5
Xist	Xist	4.21125023088467	E9.5 vs E14.5
Lepr	Lepr	-2.69601570566919	E9.5 vs E14.5
Fnd3c2	Fnd3c2	-2.30632635611445	E9.5 vs E14.5
Mical3	Mical3	-1.78030860858745	E9.5 vs E14.5
Pappa2	Pappa2	-2.07847693701556	E9.5 vs E14.5
Prl2b1	Prl2b1	-1.82315956179388	E9.5 vs E14.5
Gm42418	Gm42418	1.35707736843854	E9.5 vs E14.5
Tsc22d3	Tsc22d3	-2.11543396511552	E9.5 vs E14.5
Park2	Park2	-2.04885539723991	E9.5 vs E14.5
Prkce	Prkce	-1.32512483131252	E9.5 vs E14.5
Cdh23	Cdh23	-2.07324638232272	E9.5 vs E14.5
Pde10a	Pde10a	-1.65035394689703	E9.5 vs E14.5
Stk39	Stk39	-1.89304114082193	E9.5 vs E14.5
Tnfaip8	Tnfaip8	-1.78554007588669	E9.5 vs E14.5
Arid1b	Arid1b	-1.34682859266323	E9.5 vs E14.5
Tmem108	Tmem108	-2.36275131868097	E9.5 vs E14.5
Ncoa2	Ncoa2	-1.75569121689289	E9.5 vs E14.5
Tspan9	Tspan9	-1.41666440270504	E9.5 vs E14.5
4932438A13Rik	4932438A13Rik	-1.42549265143639	E9.5 vs E14.5
Mtcl1	Mtcl1	-1.8472099039688	E9.5 vs E14.5
Rabgap1l	Rabgap1l	-1.71514471066089	E9.5 vs E14.5
Dst	Dst	-0.771005937084468	E9.5 vs E14.5
Sept9	Sept9	-1.48534638427003	E9.5 vs E14.5
Ctif	Ctif	-1.67185260618999	E9.5 vs E14.5
Flt1	Flt1	-1.68683750246681	E9.5 vs E14.5
Shroom4	Shroom4	-1.18317729341011	E9.5 vs E14.5
Maml3	Maml3	-0.972695749437731	E9.5 vs E14.5
Fhit	Fhit	-1.86018027074108	E9.5 vs E14.5
Pitpnm2	Pitpnm2	-1.48975772338612	E9.5 vs E14.5
Diaph3	Diaph3	1.79018852992963	E9.5 vs E14.5
Kazn	Kazn	-1.39719235776132	E9.5 vs E14.5
Prlr	Prlr	1.8696749144074	E9.5 vs E14.5
Ppp2r2c	Ppp2r2c	-1.59669136403251	E9.5 vs E14.5
Plxna4	Plxna4	-2.21763113286089	E9.5 vs E14.5
Slc7a1	Slc7a1	-1.22756289284945	E9.5 vs E14.5
Myo1e	Myo1e	-1.47620170317913	E9.5 vs E14.5
Prl3b1	Prl3b1	-1.82728086614219	E9.5 vs E14.5
Ctsj	Ctsj	-1.65601073529404	E9.5 vs E14.5
App	App	-1.08757887251374	E9.5 vs E14.5
Inf2	Inf2	-1.45701809264813	E9.5 vs E14.5
Gphn	Gphn	1.27757719571368	E9.5 vs E14.5
Fam214a	Fam214a	-1.49233271616067	E9.5 vs E14.5
AC118475.1	AC118475.1	-1.55267696943708	E9.5 vs E14.5
Cmss1	Cmss1	1.09159434260701	E9.5 vs E14.5
Ctdspl	Ctdspl	-0.812588237313641	E9.5 vs E14.5
Sgms1	Sgms1	-1.2363840346814	E9.5 vs E14.5
AY036118	AY036118	1.49193020562946	E9.5 vs E14.5
Tcf12	Tcf12	0.82053422092295	E9.5 vs E14.5
Magi3	Magi3	0.860356152506045	E9.5 vs E14.5
Plekha6	Plekha6	-1.10812192294118	E9.5 vs E14.5
Btbd11	Btbd11	1.82498472853462	E9.5 vs E14.5
Plac1	Plac1	1.54488311122261	E9.5 vs E14.5
Phf8	Phf8	-1.34865087711147	E9.5 vs E14.5
Rassf3	Rassf3	-1.39537941115405	E9.5 vs E14.5
Ptprj	Ptprj	-1.57165306625356	E9.5 vs E14.5
Caskin1	Caskin1	-1.24499812313344	E9.5 vs E14.5
Chst9	Chst9	-1.67149205037194	E9.5 vs E14.5
Foxn3	Foxn3	-1.22571172380432	E9.5 vs E14.5
Glis1	Glis1	-1.47925947945998	E9.5 vs E14.5
Prune2	Prune2	1.48023685550152	E9.5 vs E14.5
Epas1	Epas1	-0.933402982498575	E9.5 vs E14.5
Nkain2	Nkain2	-1.55604801021141	E9.5 vs E14.5
Adarb1	Adarb1	-1.3067967710577	E9.5 vs E14.5
Mast4	Mast4	-1.62517053678285	E9.5 vs E14.5
1700025G04Rik	1700025G04Rik	-0.647095516545623	E9.5 vs E14.5
Srgap2	Srgap2	1.17309254168366	E9.5 vs E14.5
Rin2	Rin2	-1.27586848165367	E9.5 vs E14.5
Cers6	Cers6	-1.30130370515279	E9.5 vs E14.5
Fndc3a	Fndc3a	-1.1745891883307	E9.5 vs E14.5
Kcnq1ot1	Kcnq1ot1	0.955546764732281	E9.5 vs E14.5
2610035D17Rik	2610035D17Rik	-1.19179666603269	E9.5 vs E14.5
Map1b	Map1b	-1.06648937782842	E9.5 vs E14.5
Afap1l2	Afap1l2	-0.900839640388119	E9.5 vs E14.5
Mgat5	Mgat5	-0.877026710710483	E9.5 vs E14.5
Chsy1	Chsy1	1.14875593653269	E9.5 vs E14.5
Efr3b	Efr3b	-1.35161634908253	E9.5 vs E14.5
Zfhx3	Zfhx3	-1.28251208613195	E9.5 vs E14.5
Tox2	Tox2	-1.10393958465231	E9.5 vs E14.5
Man1c1	Man1c1	-1.29721623358277	E9.5 vs E14.5
Map4k4	Map4k4	-0.849550875550981	E9.5 vs E14.5
Gng12	Gng12	-0.618173715026503	E9.5 vs E14.5
Dapk2	Dapk2	-1.28632026911611	E9.5 vs E14.5
Cyth1	Cyth1	-1.08206814728455	E9.5 vs E14.5
Bach2	Bach2	-1.28894763034978	E9.5 vs E14.5
Cdh24	Cdh24	-1.02252058837654	E9.5 vs E14.5
Fndc3b	Fndc3b	-0.685334092873207	E9.5 vs E14.5
Ghrh	Ghrh	-1.21520143640706	E9.5 vs E14.5
Nos1ap	Nos1ap	-0.730766114266367	E9.5 vs E14.5
Slc45a4	Slc45a4	-1.04310463205768	E9.5 vs E14.5
Prl8a9	Prl8a9	-1.07021364611637	E9.5 vs E14.5
Lnx2	Lnx2	-1.13072651609364	E9.5 vs E14.5
Tacc2	Tacc2	-1.05882049404207	E9.5 vs E14.5
Pdlim1	Pdlim1	-0.910116256225526	E9.5 vs E14.5
Mid1	Mid1	1.18344314446428	E9.5 vs E14.5
Setbp1	Setbp1	-1.07573256593243	E9.5 vs E14.5
Fmnl3	Fmnl3	-1.03936826600042	E9.5 vs E14.5
Zmat1	Zmat1	-1.05146910953153	E9.5 vs E14.5
Cep350	Cep350	-0.897703409088868	E9.5 vs E14.5
Pparg	Pparg	-0.845447492809618	E9.5 vs E14.5
Hivep2	Hivep2	-1.16379079424717	E9.5 vs E14.5
Arid5b	Arid5b	-0.842450604656173	E9.5 vs E14.5
Sfmbt2	Sfmbt2	0.551267319712392	E9.5 vs E14.5
Mthfd1l	Mthfd1l	1.29778898439727	E9.5 vs E14.5
Ccnjl	Ccnjl	-1.07686136169412	E9.5 vs E14.5
Dapk1	Dapk1	-1.235401125892	E9.5 vs E14.5
Ssbp4	Ssbp4	-1.00763291473791	E9.5 vs E14.5
Svil	Svil	1.09375223862827	E9.5 vs E14.5
Arrb1	Arrb1	-1.01465370438139	E9.5 vs E14.5
Gulp1	Gulp1	1.50246551519538	E9.5 vs E14.5
Mad1l1	Mad1l1	1.17193953980593	E9.5 vs E14.5
Smad1	Smad1	-1.16986115290798	E9.5 vs E14.5
Afap1	Afap1	-0.911112129355938	E9.5 vs E14.5
Ube2e2	Ube2e2	-0.938068981280398	E9.5 vs E14.5
Lmbr1	Lmbr1	-0.929395026824163	E9.5 vs E14.5
Insc	Insc	-1.01185156358641	E9.5 vs E14.5
Mitf	Mitf	-1.01611085304802	E9.5 vs E14.5
Ipo5	Ipo5	1.05397937894637	E9.5 vs E14.5
Rgl2	Rgl2	-1.03363860366542	E9.5 vs E14.5
Plekhg2	Plekhg2	-0.981302606908934	E9.5 vs E14.5
C2cd2	C2cd2	-1.06743390561309	E9.5 vs E14.5
Mfhas1	Mfhas1	-0.887952002260457	E9.5 vs E14.5
Med13l	Med13l	-0.87066780640022	E9.5 vs E14.5
Tsix	Tsix	1.03461704682524	E9.5 vs E14.5
Xpo7	Xpo7	1.06448888346526	E9.5 vs E14.5
Fam78b	Fam78b	-0.829937078659594	E9.5 vs E14.5
Gramd4	Gramd4	-1.06079024845261	E9.5 vs E14.5
Atp6v0a1	Atp6v0a1	-1.00899191483941	E9.5 vs E14.5
Ncoa7	Ncoa7	-0.907415351171948	E9.5 vs E14.5
Myo10	Myo10	-0.744052432568308	E9.5 vs E14.5
Mdfic	Mdfic	-0.990979991827478	E9.5 vs E14.5
Fbxo21	Fbxo21	-0.890953838582829	E9.5 vs E14.5
Rgs17	Rgs17	-0.9987446908208	E9.5 vs E14.5
Hivep1	Hivep1	-1.10622067959637	E9.5 vs E14.5
Bend6	Bend6	-0.949906722801687	E9.5 vs E14.5
Meis2	Meis2	-1.0450273989041	E9.5 vs E14.5
Map7d1	Map7d1	-0.865886589237396	E9.5 vs E14.5
Rcor1	Rcor1	-0.636933647370564	E9.5 vs E14.5
Golgb1	Golgb1	-0.924568790018033	E9.5 vs E14.5
Mbd6	Mbd6	-1.03782006135583	E9.5 vs E14.5
Itga7	Itga7	1.0008790981484	E9.5 vs E14.5
St3gal6	St3gal6	-0.934771453305646	E9.5 vs E14.5
Wdfy3	Wdfy3	-0.724393415872627	E9.5 vs E14.5
Lmtk2	Lmtk2	-0.940211047431606	E9.5 vs E14.5
Igf2bp2	Igf2bp2	1.19825144403579	E9.5 vs E14.5
Gmds	Gmds	-0.911105057059172	E9.5 vs E14.5
Osbpl10	Osbpl10	1.19591364975822	E9.5 vs E14.5
Uty	Uty	-0.903240081920963	E9.5 vs E14.5
Arhgap26	Arhgap26	-1.0593793904254	E9.5 vs E14.5
Sept11	Sept11	1.12158981134687	E9.5 vs E14.5
Pds5b	Pds5b	1.00153861338584	E9.5 vs E14.5
Ube2h	Ube2h	-0.672281181969463	E9.5 vs E14.5
4930554G24Rik	4930554G24Rik	-1.25997598557247	E9.5 vs E14.5
Tpbpa	Tpbpa	-0.986735482239277	E9.5 vs E14.5
Dock1	Dock1	-0.954934761933757	E9.5 vs E14.5
Rgs5	Rgs5	-0.8331572859555	E9.5 vs E14.5
Zzef1	Zzef1	-0.918671167930144	E9.5 vs E14.5
Atp2b1	Atp2b1	-0.667166472757151	E9.5 vs E14.5
Prl7a2	Prl7a2	-0.87045703288222	E9.5 vs E14.5
Etl4	Etl4	0.460356427051177	E9.5 vs E14.5
Wwc1	Wwc1	-0.918528471918543	E9.5 vs E14.5
A630089N07Rik	A630089N07Rik	1.07699849289692	E9.5 vs E14.5
Fbxw8	Fbxw8	-0.698820092963178	E9.5 vs E14.5
Mum1l1	Mum1l1	-1.02416295179715	E9.5 vs E14.5
Mms22l	Mms22l	1.04584643465881	E9.5 vs E14.5
Ghr	Ghr	-0.95600472024488	E9.5 vs E14.5
Vstm4	Vstm4	-0.896049540338577	E9.5 vs E14.5
Chn2	Chn2	-1.11045553802093	E9.5 vs E14.5
Agpat4	Agpat4	0.997103096756452	E9.5 vs E14.5
Cdh4	Cdh4	1.17371443164066	E9.5 vs E14.5
Cep128	Cep128	1.03254562048604	E9.5 vs E14.5
Elf1	Elf1	-0.948098139329583	E9.5 vs E14.5
Sec14l1	Sec14l1	-0.95417317143262	E9.5 vs E14.5
Cited1	Cited1	-1.01648702262749	E9.5 vs E14.5
Ube2o	Ube2o	-0.686602417862888	E9.5 vs E14.5
Nsd2	Nsd2	0.918617927062674	E9.5 vs E14.5
Pik3r1	Pik3r1	-0.861940282208373	E9.5 vs E14.5
Fam46a	Fam46a	-0.957757232144512	E9.5 vs E14.5
Tns3	Tns3	-0.859099117763121	E9.5 vs E14.5
Nhsl1	Nhsl1	1.22008471153796	E9.5 vs E14.5
Klhl13	Klhl13	0.622593396990568	E9.5 vs E14.5
Smc4	Smc4	1.04538621176622	E9.5 vs E14.5
Mki67	Mki67	1.12791901044552	E9.5 vs E14.5
Etv6	Etv6	-0.893179672807943	E9.5 vs E14.5
Pde8a	Pde8a	-0.991585557546212	E9.5 vs E14.5
2900026A02Rik	2900026A02Rik	-0.789191605303208	E9.5 vs E14.5
Ptpre	Ptpre	-0.919667332332005	E9.5 vs E14.5
Thsd4	Thsd4	-1.40881254726428	E9.5 vs E14.5
Cxxc5	Cxxc5	-0.816114023249894	E9.5 vs E14.5
Tmcc3	Tmcc3	-0.900100403970243	E9.5 vs E14.5
Creg1	Creg1	-0.939927696547212	E9.5 vs E14.5
Dlgap4	Dlgap4	-0.829403663434413	E9.5 vs E14.5
Plekhh2	Plekhh2	1.16584482653148	E9.5 vs E14.5
Dock9	Dock9	-0.502251020987111	E9.5 vs E14.5
Ica1	Ica1	-0.909931660773138	E9.5 vs E14.5
Arhgap31	Arhgap31	-0.57404753614417	E9.5 vs E14.5
Pola1	Pola1	1.28339770443466	E9.5 vs E14.5
Mpped2	Mpped2	-1.01600884236572	E9.5 vs E14.5
Hsd17b2	Hsd17b2	-0.953573809090459	E9.5 vs E14.5
Ccdc6	Ccdc6	-0.846269127688248	E9.5 vs E14.5
Fn1	Fn1	-0.655667047527077	E9.5 vs E14.5
Sgpp2	Sgpp2	-0.93275358814446	E9.5 vs E14.5
Zfp395	Zfp395	-0.737588219031741	E9.5 vs E14.5
Fam90a1b	Fam90a1b	-0.728215795619352	E9.5 vs E14.5
Mgat4a	Mgat4a	-0.801522225876802	E9.5 vs E14.5
Rgma	Rgma	-0.828815346457346	E9.5 vs E14.5
Gm28285	Gm28285	1.03211409849486	E9.5 vs E14.5
Psg23	Psg23	-0.916573374517175	E9.5 vs E14.5
Cts6	Cts6	-0.951001657272295	E9.5 vs E14.5
Adam12	Adam12	-0.972146880993925	E9.5 vs E14.5
Serinc5	Serinc5	-0.800425949474389	E9.5 vs E14.5
Faf1	Faf1	0.764552454634098	E9.5 vs E14.5
Herc4	Herc4	-0.559057164013454	E9.5 vs E14.5
Mef2d	Mef2d	-0.804420664538904	E9.5 vs E14.5
Arhgap8	Arhgap8	-0.869250050665075	E9.5 vs E14.5
Itga3	Itga3	-0.819012592642576	E9.5 vs E14.5
Cmtm4	Cmtm4	-0.865706941351478	E9.5 vs E14.5
Tpm1	Tpm1	1.12957639326165	E9.5 vs E14.5
Spred2	Spred2	-0.769245752094665	E9.5 vs E14.5
Cdk19	Cdk19	-0.872894942879566	E9.5 vs E14.5
Top2a	Top2a	0.956247142041203	E9.5 vs E14.5
Cit	Cit	0.820887994718751	E9.5 vs E14.5
Topbp1	Topbp1	0.931025508963574	E9.5 vs E14.5
Inpp4a	Inpp4a	-0.848924575819336	E9.5 vs E14.5
AW554918	AW554918	0.966945660413966	E9.5 vs E14.5
Eva1a	Eva1a	-0.810321977233216	E9.5 vs E14.5
Cdk17	Cdk17	-0.684948047976396	E9.5 vs E14.5
Slc2a13	Slc2a13	-1.06742910445428	E9.5 vs E14.5
Cdk8	Cdk8	0.849770795479676	E9.5 vs E14.5
Ammecr1	Ammecr1	-0.874004368554599	E9.5 vs E14.5
Zmiz1	Zmiz1	-0.712514694580963	E9.5 vs E14.5
Fubp1	Fubp1	0.71920328788624	E9.5 vs E14.5
Ppfibp2	Ppfibp2	-0.668328238830763	E9.5 vs E14.5
Nedd4l	Nedd4l	-0.461380808923839	E9.5 vs E14.5
Ankrd35	Ankrd35	-0.720224098271685	E9.5 vs E14.5
Ikzf2	Ikzf2	-0.838862922507589	E9.5 vs E14.5
Lmnb1	Lmnb1	0.948987376888701	E9.5 vs E14.5
Snap91	Snap91	-0.737648397620874	E9.5 vs E14.5
Cgnl1	Cgnl1	-0.744691669977475	E9.5 vs E14.5
Tbc1d8	Tbc1d8	-0.789940365254803	E9.5 vs E14.5
Mid2	Mid2	-0.770850973506819	E9.5 vs E14.5
Crybg1	Crybg1	-0.75060869559312	E9.5 vs E14.5
Gnas	Gnas	-0.605716879708544	E9.5 vs E14.5
Pcgf5	Pcgf5	-0.633626698792338	E9.5 vs E14.5
Npas2	Npas2	-0.739441842392662	E9.5 vs E14.5
Dock8	Dock8	-0.671612685853391	E9.5 vs E14.5
Eif4g3	Eif4g3	0.92142509710561	E9.5 vs E14.5
Snx25	Snx25	0.852045987220206	E9.5 vs E14.5
Snx9	Snx9	-0.648797924373925	E9.5 vs E14.5
Dpf3	Dpf3	-0.600422241520435	E9.5 vs E14.5
Snx29	Snx29	-0.731778221074525	E9.5 vs E14.5
Psd3	Psd3	-0.695206628052128	E9.5 vs E14.5
Psg27	Psg27	-0.657001962861113	E9.5 vs E14.5
Macf1	Macf1	-0.536395410733566	E9.5 vs E14.5
Ksr1	Ksr1	1.02768291672395	E9.5 vs E14.5
Zfp608	Zfp608	1.03098282313618	E9.5 vs E14.5
Meis1	Meis1	-0.821281588633931	E9.5 vs E14.5
Cenpp	Cenpp	1.18971709754869	E9.5 vs E14.5
Erc1	Erc1	0.736383235622731	E9.5 vs E14.5
Dgat1	Dgat1	-0.834333278935689	E9.5 vs E14.5
Rtn4	Rtn4	1.03971244525272	E9.5 vs E14.5
Strbp	Strbp	1.00113228687949	E9.5 vs E14.5
Wscd2	Wscd2	0.818044737900308	E9.5 vs E14.5
Map2k1	Map2k1	-0.573030557279594	E9.5 vs E14.5
Myo18a	Myo18a	-0.556970516381263	E9.5 vs E14.5
Tns1	Tns1	-0.744042765862764	E9.5 vs E14.5
Arhgef7	Arhgef7	1.0690845114398	E9.5 vs E14.5
Edem2	Edem2	-0.683162482690747	E9.5 vs E14.5
Gm26542	Gm26542	-0.746915683461713	E9.5 vs E14.5
Tmeff1	Tmeff1	0.84887606467614	E9.5 vs E14.5
Rps6ka6	Rps6ka6	-0.809438081148892	E9.5 vs E14.5
Pkd1	Pkd1	-0.729347779059739	E9.5 vs E14.5
Spata5	Spata5	0.81948571738843	E9.5 vs E14.5
Adgra3	Adgra3	-0.611455296445609	E9.5 vs E14.5
Slc25a13	Slc25a13	0.970922238975527	E9.5 vs E14.5
Las1l	Las1l	-0.607695471658323	E9.5 vs E14.5
Map4k3	Map4k3	-0.687731629121486	E9.5 vs E14.5
Carmil1	Carmil1	0.724220813085891	E9.5 vs E14.5
Grb10	Grb10	-0.823229092167769	E9.5 vs E14.5
Nr6a1	Nr6a1	0.854945443664078	E9.5 vs E14.5
Mvb12b	Mvb12b	-0.817708586260304	E9.5 vs E14.5
Arhgef1	Arhgef1	-0.820098564615049	E9.5 vs E14.5
Chd4	Chd4	0.87497548414991	E9.5 vs E14.5
Rbm25	Rbm25	-0.473649540021634	E9.5 vs E14.5
Ahcyl2	Ahcyl2	-0.666156023829623	E9.5 vs E14.5
Nrip1	Nrip1	-0.535159895567166	E9.5 vs E14.5
Rif1	Rif1	0.913591332093376	E9.5 vs E14.5
Pdss1	Pdss1	0.941491569772368	E9.5 vs E14.5
Clasp2	Clasp2	0.782150961491328	E9.5 vs E14.5
Srgap3	Srgap3	-0.583387002462634	E9.5 vs E14.5
Rsrp1	Rsrp1	-0.631003415270312	E9.5 vs E14.5
Nav3	Nav3	0.901073456627697	E9.5 vs E14.5
Tanc2	Tanc2	0.802116899944441	E9.5 vs E14.5
Micall1	Micall1	-0.649553984571617	E9.5 vs E14.5
Tspan14	Tspan14	-0.609227438607686	E9.5 vs E14.5
Foxj2	Foxj2	-0.646085935228111	E9.5 vs E14.5
Kat2b	Kat2b	-0.715330680965786	E9.5 vs E14.5
Ak8	Ak8	-0.854299365644107	E9.5 vs E14.5
Acaca	Acaca	0.922799622416057	E9.5 vs E14.5
Car5b	Car5b	-0.765995032374696	E9.5 vs E14.5
Ogt	Ogt	0.684041563965716	E9.5 vs E14.5
Ranbp17	Ranbp17	0.95797666769487	E9.5 vs E14.5
Wtip	Wtip	-0.72184082800565	E9.5 vs E14.5
Atp1b1	Atp1b1	0.770022126666275	E9.5 vs E14.5
Eif2s3x	Eif2s3x	0.850177576211125	E9.5 vs E14.5
Polq	Polq	0.80853962107036	E9.5 vs E14.5
Ftx	Ftx	0.904432153157512	E9.5 vs E14.5
Med12	Med12	-0.71678217126987	E9.5 vs E14.5
Specc1	Specc1	0.720437299022559	E9.5 vs E14.5
Sspn	Sspn	-0.65273247653262	E9.5 vs E14.5
Ceacam5	Ceacam5	-0.576053345205555	E9.5 vs E14.5
Tcf4	Tcf4	0.437662197916107	E9.5 vs E14.5
Pacsin3	Pacsin3	-0.678717977634153	E9.5 vs E14.5
Arhgef25	Arhgef25	-0.750025581766236	E9.5 vs E14.5
Cyth3	Cyth3	-0.621396733194595	E9.5 vs E14.5
Socs2	Socs2	-0.627081537839608	E9.5 vs E14.5
Psg21	Psg21	-0.661613921054882	E9.5 vs E14.5
Kcnq1	Kcnq1	0.911516019873322	E9.5 vs E14.5
Mat2a	Mat2a	0.846475840937517	E9.5 vs E14.5
Kmt2c	Kmt2c	-0.579926856949047	E9.5 vs E14.5
Mras	Mras	-0.781905227511211	E9.5 vs E14.5
Blvrb	Blvrb	-0.689116211471405	E9.5 vs E14.5
Cds1	Cds1	-0.613640013976107	E9.5 vs E14.5
Thada	Thada	0.922721175194449	E9.5 vs E14.5
Ston2	Ston2	-0.682928200826931	E9.5 vs E14.5
Snx5	Snx5	0.857846650687388	E9.5 vs E14.5
Pdlim2	Pdlim2	-0.686660824454483	E9.5 vs E14.5
Proser2	Proser2	-0.684502108047036	E9.5 vs E14.5
Braf	Braf	0.609081924193921	E9.5 vs E14.5
Arhgef6	Arhgef6	-0.554192339369827	E9.5 vs E14.5
Slf1	Slf1	0.865017874919157	E9.5 vs E14.5
Acaa1a	Acaa1a	-0.757658323090437	E9.5 vs E14.5
Pxn	Pxn	-0.755970194713272	E9.5 vs E14.5
Aamp	Aamp	-0.711804329847254	E9.5 vs E14.5
Alpl	Alpl	-0.723057879856865	E9.5 vs E14.5
Ola1	Ola1	0.819037350951133	E9.5 vs E14.5
Ctsm	Ctsm	-0.585917858448445	E9.5 vs E14.5
Klf13	Klf13	-0.613047358210897	E9.5 vs E14.5
Ankrd33b	Ankrd33b	-0.671206450118478	E9.5 vs E14.5
Ppfibp1	Ppfibp1	-0.601151045534167	E9.5 vs E14.5
Heca	Heca	-0.643082454754478	E9.5 vs E14.5
St6gal1	St6gal1	-0.808029596273252	E9.5 vs E14.5
Tmem266	Tmem266	0.988133500327656	E9.5 vs E14.5
Bod1l	Bod1l	-0.641037788064218	E9.5 vs E14.5
Prl7d1	Prl7d1	-0.787538544091238	E9.5 vs E14.5
Snhg11	Snhg11	0.669968640091067	E9.5 vs E14.5
Psmd14	Psmd14	0.803296408314876	E9.5 vs E14.5
Psme4	Psme4	0.788274087717039	E9.5 vs E14.5
Ptprn2	Ptprn2	-0.720586158377683	E9.5 vs E14.5
Plxnb1	Plxnb1	-0.828164358890258	E9.5 vs E14.5
Zc3h7b	Zc3h7b	-0.68600351853791	E9.5 vs E14.5
Enah	Enah	1.02822259559216	E9.5 vs E14.5
Baz2a	Baz2a	-0.575952915232185	E9.5 vs E14.5
Hells	Hells	0.818420515963971	E9.5 vs E14.5
Cobll1	Cobll1	-0.47834768741681	E9.5 vs E14.5
Polr3c	Polr3c	-0.650423680595392	E9.5 vs E14.5
Plekha5	Plekha5	-0.503993545344426	E9.5 vs E14.5
Spred1	Spred1	-0.480637555242765	E9.5 vs E14.5
Igf2bp3	Igf2bp3	0.768350489430253	E9.5 vs E14.5
Slc15a2	Slc15a2	-0.660855458921826	E9.5 vs E14.5
Zbtb20	Zbtb20	-0.796525943110301	E9.5 vs E14.5
Tgfb2	Tgfb2	-0.710768572403273	E9.5 vs E14.5
Stk10	Stk10	0.789797295270582	E9.5 vs E14.5
Zwilch	Zwilch	0.815587030705825	E9.5 vs E14.5
Man1a	Man1a	-0.735997103060938	E9.5 vs E14.5
Gpd2	Gpd2	-0.699745425719586	E9.5 vs E14.5
Jdp2	Jdp2	-0.600213010004038	E9.5 vs E14.5
Rbms1	Rbms1	0.292303216092751	E9.5 vs E14.5
Zbtb34	Zbtb34	-0.603122034645659	E9.5 vs E14.5
Birc6	Birc6	0.530581985537415	E9.5 vs E14.5
Sorbs1	Sorbs1	-0.402306663239243	E9.5 vs E14.5
Ppp1r13b	Ppp1r13b	0.920293281894818	E9.5 vs E14.5
Flvcr2	Flvcr2	-0.728334942744452	E9.5 vs E14.5
Ankrd10	Ankrd10	0.781181342549154	E9.5 vs E14.5
Lrig1	Lrig1	-0.776786600075141	E9.5 vs E14.5
R3hdm1	R3hdm1	0.723653816955673	E9.5 vs E14.5
Cyb5a	Cyb5a	-0.83641413295142	E9.5 vs E14.5
Il6ra	Il6ra	-0.591193311330276	E9.5 vs E14.5
Heatr5a	Heatr5a	0.548610373131956	E9.5 vs E14.5
Pdgfrb	Pdgfrb	-0.688641243888344	E9.5 vs E14.5
Ceacam14	Ceacam14	-0.586090879244982	E9.5 vs E14.5
Hbb-bs	Hbb-bs	-0.758237652059879	E9.5 vs E14.5
Utp20	Utp20	0.803389657575119	E9.5 vs E14.5
Lzts2	Lzts2	-0.619174758033196	E9.5 vs E14.5
Kdm5b	Kdm5b	-0.71668341325532	E9.5 vs E14.5
Rfx7	Rfx7	0.878970309973707	E9.5 vs E14.5
Magi1	Magi1	-0.623272047216019	E9.5 vs E14.5
Pik3cd	Pik3cd	-0.626214664525419	E9.5 vs E14.5
Fbxl17	Fbxl17	-0.494628306545279	E9.5 vs E14.5
Ptpn4	Ptpn4	0.755438533640599	E9.5 vs E14.5
Wipf2	Wipf2	-0.610863603618492	E9.5 vs E14.5
Asap1	Asap1	0.612154047800276	E9.5 vs E14.5
Uba6	Uba6	-0.664859291530839	E9.5 vs E14.5
Gna12	Gna12	-0.615628580951349	E9.5 vs E14.5
Fnbp1	Fnbp1	-0.524049076056652	E9.5 vs E14.5
Lnpep	Lnpep	-0.481243808605986	E9.5 vs E14.5
Lars2	Lars2	0.712800809249622	E9.5 vs E14.5
Adgrf5	Adgrf5	-0.47074761572534	E9.5 vs E14.5
Npm1	Npm1	0.767007754974253	E9.5 vs E14.5
Znrf1	Znrf1	-0.576156373053416	E9.5 vs E14.5
Pex14	Pex14	-0.504291117387108	E9.5 vs E14.5
Nbeal2	Nbeal2	-0.64777437323042	E9.5 vs E14.5
Rora	Rora	-0.87495295968807	E9.5 vs E14.5
Kif15	Kif15	0.769281629484396	E9.5 vs E14.5
Cspp1	Cspp1	0.719630165194554	E9.5 vs E14.5
Crip2	Crip2	-0.632541206571324	E9.5 vs E14.5
Drosha	Drosha	0.819575422420224	E9.5 vs E14.5
Smc3	Smc3	0.607222289770995	E9.5 vs E14.5
Hsd17b4	Hsd17b4	-0.682727554603004	E9.5 vs E14.5
Ncoa3	Ncoa3	-0.672415072863662	E9.5 vs E14.5
Ddrgk1	Ddrgk1	-0.619070717885679	E9.5 vs E14.5
Svep1	Svep1	-0.674053247123063	E9.5 vs E14.5
Sox13	Sox13	-0.600509855723372	E9.5 vs E14.5
Ptprg	Ptprg	0.944406183910987	E9.5 vs E14.5
Arih1	Arih1	0.649987667715005	E9.5 vs E14.5
Lims2	Lims2	-0.548058974841844	E9.5 vs E14.5
Brca1	Brca1	0.872038558102272	E9.5 vs E14.5
Acox1	Acox1	-0.708350952286854	E9.5 vs E14.5
Ankrd12	Ankrd12	-0.722237689933039	E9.5 vs E14.5
Gmip	Gmip	-0.553188917384029	E9.5 vs E14.5
Scube1	Scube1	0.798684347191554	E9.5 vs E14.5
Daam1	Daam1	-0.459272663557291	E9.5 vs E14.5
Sema6a	Sema6a	-0.679724271129634	E9.5 vs E14.5
D630045J12Rik	D630045J12Rik	0.976656174127467	E9.5 vs E14.5
Pdia5	Pdia5	-0.678332556045076	E9.5 vs E14.5
Tcf7l1	Tcf7l1	0.884588749185801	E9.5 vs E14.5
Ing2	Ing2	-0.637962583835619	E9.5 vs E14.5
Eps8	Eps8	0.813575756081685	E9.5 vs E14.5
Cdk5rap2	Cdk5rap2	0.639179687988054	E9.5 vs E14.5
Src	Src	-0.579285078917099	E9.5 vs E14.5
Bcar1	Bcar1	-0.657072930392308	E9.5 vs E14.5
Ulk2	Ulk2	-0.560277438352001	E9.5 vs E14.5
Large1	Large1	0.910509546775597	E9.5 vs E14.5
Kif11	Kif11	0.778747477526007	E9.5 vs E14.5
Plekhh1	Plekhh1	-0.477828770613231	E9.5 vs E14.5
Rbbp6	Rbbp6	-0.538720071677748	E9.5 vs E14.5
Dsp	Dsp	-0.48821763460525	E9.5 vs E14.5
Foxk1	Foxk1	-0.640819559800798	E9.5 vs E14.5
Ror1	Ror1	-0.801147538523436	E9.5 vs E14.5
Capn15	Capn15	-0.475341494030169	E9.5 vs E14.5
Fbxo36	Fbxo36	-0.611250336358505	E9.5 vs E14.5
Zcchc14	Zcchc14	-0.643485932219829	E9.5 vs E14.5
Hat1	Hat1	0.787976028892339	E9.5 vs E14.5
Gen1	Gen1	0.683479436616132	E9.5 vs E14.5
Kpnb1	Kpnb1	0.645975906109954	E9.5 vs E14.5
Simc1	Simc1	-0.544062547570325	E9.5 vs E14.5
Pwwp2a	Pwwp2a	0.697490586377222	E9.5 vs E14.5
2810403A07Rik	2810403A07Rik	0.578340513237683	E9.5 vs E14.5
Kat6b	Kat6b	0.623704909260503	E9.5 vs E14.5
Nsd3	Nsd3	-0.426735398405573	E9.5 vs E14.5
Ppp1r12a	Ppp1r12a	0.635923024897281	E9.5 vs E14.5
Itm2b	Itm2b	-0.521242670368626	E9.5 vs E14.5
Smc2	Smc2	0.660059439666162	E9.5 vs E14.5
Rnf157	Rnf157	-0.531028257551892	E9.5 vs E14.5
Atp9a	Atp9a	-0.658101263662753	E9.5 vs E14.5
Cs	Cs	0.705463206720874	E9.5 vs E14.5
Pus7	Pus7	0.637340438976831	E9.5 vs E14.5
Cts3	Cts3	-0.534738005632654	E9.5 vs E14.5
Arhgap28	Arhgap28	-0.435975991278675	E9.5 vs E14.5
Fam135a	Fam135a	0.755508754384321	E9.5 vs E14.5
Pcm1	Pcm1	0.724699193218656	E9.5 vs E14.5
Phf20	Phf20	-0.550360477392309	E9.5 vs E14.5
Hk1	Hk1	-0.548732154442945	E9.5 vs E14.5
Ctsr	Ctsr	-0.611552989425319	E9.5 vs E14.5
Cdkn1c	Cdkn1c	0.658074471457048	E9.5 vs E14.5
Kif20b	Kif20b	0.784689994499516	E9.5 vs E14.5
Taf7l	Taf7l	-0.536642395820314	E9.5 vs E14.5
Stra6	Stra6	-0.681979526331221	E9.5 vs E14.5
Abr	Abr	0.517646630632086	E9.5 vs E14.5
Camk2d	Camk2d	-0.542369729935249	E9.5 vs E14.5
Clspn	Clspn	0.645227802224911	E9.5 vs E14.5
Usp6nl	Usp6nl	-0.548416469700321	E9.5 vs E14.5
Dnajc13	Dnajc13	0.700530736040685	E9.5 vs E14.5
Dopey2	Dopey2	-0.578518109381737	E9.5 vs E14.5
Larp1	Larp1	0.845221253700593	E9.5 vs E14.5
Sdr42e1	Sdr42e1	-0.514250080378561	E9.5 vs E14.5
Atp2a2	Atp2a2	0.684072029011098	E9.5 vs E14.5
Atg4c	Atg4c	-0.625455788635315	E9.5 vs E14.5
Mdn1	Mdn1	0.781909106195725	E9.5 vs E14.5
Pkp4	Pkp4	-0.676514629302836	E9.5 vs E14.5
Acvr1	Acvr1	-0.631533518936234	E9.5 vs E14.5
Mthfd1	Mthfd1	0.694209703122007	E9.5 vs E14.5
Blm	Blm	0.761156318076357	E9.5 vs E14.5
Farp1	Farp1	-0.403061553445472	E9.5 vs E14.5
Mga	Mga	-0.495264506801829	E9.5 vs E14.5
Cdca2	Cdca2	0.693066356704799	E9.5 vs E14.5
Sfi1	Sfi1	-0.496826038776255	E9.5 vs E14.5
Otud4	Otud4	-0.620651854104807	E9.5 vs E14.5
Knl1	Knl1	0.622904218084444	E9.5 vs E14.5
Pvt1	Pvt1	0.70946640137922	E9.5 vs E14.5
Dnaic1	Dnaic1	-0.522183089173474	E9.5 vs E14.5
Dnmbp	Dnmbp	-0.643427290875866	E9.5 vs E14.5
Cenpe	Cenpe	0.678253035517203	E9.5 vs E14.5
Tjp2	Tjp2	-0.522573451812306	E9.5 vs E14.5
Arhgef10	Arhgef10	-0.632479041942126	E9.5 vs E14.5
Fbxl20	Fbxl20	-0.459305438724637	E9.5 vs E14.5
Ncl	Ncl	0.788368571938276	E9.5 vs E14.5
Anln	Anln	0.643482322505171	E9.5 vs E14.5
Slc16a10	Slc16a10	-0.469009617003252	E9.5 vs E14.5
Hbb-y	Hbb-y	0.676275580071537	E9.5 vs E14.5
Tug1	Tug1	-0.485313534594377	E9.5 vs E14.5
Fanca	Fanca	0.692192756177059	E9.5 vs E14.5
Noct	Noct	-0.564237718126503	E9.5 vs E14.5
Tnrc6c	Tnrc6c	0.68224296376597	E9.5 vs E14.5
Lmna	Lmna	-0.511746723123739	E9.5 vs E14.5
Dbnl	Dbnl	-0.587857448076815	E9.5 vs E14.5
Ehmt1	Ehmt1	0.587590065119695	E9.5 vs E14.5
Spen	Spen	-0.564254807155202	E9.5 vs E14.5
Csnk1e	Csnk1e	-0.607968569322636	E9.5 vs E14.5
Ptpru	Ptpru	-0.546919325546569	E9.5 vs E14.5
Mirg	Mirg	0.76774110864568	E9.5 vs E14.5
Heg1	Heg1	-0.575703524391771	E9.5 vs E14.5
Grhl2	Grhl2	0.65338032853642	E9.5 vs E14.5
Nav2	Nav2	0.722545246932339	E9.5 vs E14.5
Hmgcl	Hmgcl	-0.498654943254495	E9.5 vs E14.5
Pds5a	Pds5a	0.466507561751916	E9.5 vs E14.5
Nhsl2	Nhsl2	-0.632603067025692	E9.5 vs E14.5
Pole	Pole	0.607196229168174	E9.5 vs E14.5
Arhgap29	Arhgap29	-0.514511208551246	E9.5 vs E14.5
Pcdh12	Pcdh12	-0.457477808738799	E9.5 vs E14.5
Atad2	Atad2	0.8396934344358	E9.5 vs E14.5
Atg10	Atg10	-0.4933810808005	E9.5 vs E14.5
Gm16897	Gm16897	-0.455051487587372	E9.5 vs E14.5
Abcc5	Abcc5	0.723592047082169	E9.5 vs E14.5
Gatad2a	Gatad2a	0.628586426864043	E9.5 vs E14.5
Spag5	Spag5	0.696458746257603	E9.5 vs E14.5
Mis18bp1	Mis18bp1	0.732493778817808	E9.5 vs E14.5
Fam219a	Fam219a	-0.528113892114076	E9.5 vs E14.5
Chchd3	Chchd3	0.517182648755509	E9.5 vs E14.5
Rbm47	Rbm47	-0.484720949387979	E9.5 vs E14.5
Dlg1	Dlg1	0.584159903746588	E9.5 vs E14.5
Bcar3	Bcar3	-0.479695294181649	E9.5 vs E14.5
Atp2c2	Atp2c2	0.569166211594082	E9.5 vs E14.5
Ntn1	Ntn1	-0.63496214023206	E9.5 vs E14.5
Rpl41	Rpl41	0.657982487126809	E9.5 vs E14.5
Krt19	Krt19	0.613884192628037	E9.5 vs E14.5
Csgalnact1	Csgalnact1	0.589796386082596	E9.5 vs E14.5
Stk31	Stk31	-0.530760253787786	E9.5 vs E14.5
Adk	Adk	0.788620848003426	E9.5 vs E14.5
Leng8	Leng8	-0.504539803777494	E9.5 vs E14.5
Uevld	Uevld	-0.521250168322747	E9.5 vs E14.5
Ddx46	Ddx46	-0.518496981425124	E9.5 vs E14.5
Crebrf	Crebrf	-0.472695794100113	E9.5 vs E14.5
Spats2	Spats2	-0.539621593355065	E9.5 vs E14.5
Atg4a	Atg4a	-0.604441478466873	E9.5 vs E14.5
Cenpf	Cenpf	0.635824462353663	E9.5 vs E14.5
Usp15	Usp15	0.702312854258508	E9.5 vs E14.5
Pdcd4	Pdcd4	-0.557390047351036	E9.5 vs E14.5
Cyb5b	Cyb5b	0.848888918347715	E9.5 vs E14.5
Nt5c2	Nt5c2	-0.622210326338878	E9.5 vs E14.5
Ccdc162	Ccdc162	-0.55097808913363	E9.5 vs E14.5
Colec12	Colec12	-0.4800224795354	E9.5 vs E14.5
Tyms	Tyms	0.663234522560983	E9.5 vs E14.5
Smarca2	Smarca2	-0.558497756513525	E9.5 vs E14.5
Evl	Evl	0.704881299576458	E9.5 vs E14.5
Ralgps1	Ralgps1	-0.55229009949725	E9.5 vs E14.5
Klhl29	Klhl29	0.775206322985972	E9.5 vs E14.5
Taf1d	Taf1d	0.701664749729806	E9.5 vs E14.5
Gnb1	Gnb1	-0.318573997826198	E9.5 vs E14.5
Sdk1	Sdk1	-0.82044678878089	E9.5 vs E14.5
Lifr	Lifr	-0.381103509663416	E9.5 vs E14.5
Uhrf1	Uhrf1	0.59096417834075	E9.5 vs E14.5
Nolc1	Nolc1	0.538126412580113	E9.5 vs E14.5
Pbx3	Pbx3	0.857347619573556	E9.5 vs E14.5
Bnc2	Bnc2	-0.422710446785304	E9.5 vs E14.5
Acvrl1	Acvrl1	-0.598278348305115	E9.5 vs E14.5
Wasf1	Wasf1	-0.531187528489922	E9.5 vs E14.5
Luzp1	Luzp1	0.572856059043053	E9.5 vs E14.5
Il1r1	Il1r1	-0.392108801422399	E9.5 vs E14.5
Tinagl1	Tinagl1	-0.492659812394301	E9.5 vs E14.5
Ipo9	Ipo9	0.596129123045061	E9.5 vs E14.5
Foxo4	Foxo4	-0.510599695543586	E9.5 vs E14.5
Cradd	Cradd	-0.659883286044717	E9.5 vs E14.5
Prkd1	Prkd1	0.518008661452424	E9.5 vs E14.5
Mphosph9	Mphosph9	0.523715310822487	E9.5 vs E14.5
Dtl	Dtl	0.58371631685805	E9.5 vs E14.5
Git2	Git2	-0.366903453857803	E9.5 vs E14.5
Elp4	Elp4	0.708631167935757	E9.5 vs E14.5
Farp2	Farp2	-0.552017967656934	E9.5 vs E14.5
Asxl2	Asxl2	0.670343014153202	E9.5 vs E14.5
Zfp423	Zfp423	-0.63536057816993	E9.5 vs E14.5
Pde7a	Pde7a	0.786548988054445	E9.5 vs E14.5
Liph	Liph	-0.581518228760114	E9.5 vs E14.5
Rab24	Rab24	-0.519981502124642	E9.5 vs E14.5
Mkln1os	Mkln1os	-0.447101391929403	E9.5 vs E14.5
Frk	Frk	0.75025689718541	E9.5 vs E14.5
Stau2	Stau2	-0.556046763165783	E9.5 vs E14.5
Pacs1	Pacs1	0.5987149278037	E9.5 vs E14.5
Sema5b	Sema5b	-0.6354464970588	E9.5 vs E14.5
Kif5c	Kif5c	-0.546266317054771	E9.5 vs E14.5
Gm13938	Gm13938	-0.440306847397866	E9.5 vs E14.5
Hspd1	Hspd1	0.64166086549877	E9.5 vs E14.5
Pag1	Pag1	-0.543014713973815	E9.5 vs E14.5
Bcor	Bcor	0.829837316881021	E9.5 vs E14.5
Kdm7a	Kdm7a	-0.441957543648967	E9.5 vs E14.5
Dlg3	Dlg3	-0.464572068537697	E9.5 vs E14.5
Phf2	Phf2	-0.487515303856355	E9.5 vs E14.5
Uchl5	Uchl5	0.590784151633264	E9.5 vs E14.5
Kdm5d	Kdm5d	-0.39405495308842	E9.5 vs E14.5
Caprin1	Caprin1	0.541205912893014	E9.5 vs E14.5
Apc	Apc	-0.445743300425784	E9.5 vs E14.5
Serbp1	Serbp1	0.666736401336622	E9.5 vs E14.5
Wwc2	Wwc2	0.62868478496255	E9.5 vs E14.5
Ankrd17	Ankrd17	0.369245078974496	E9.5 vs E14.5
Snx24	Snx24	0.606281526577018	E9.5 vs E14.5
Fbxl19	Fbxl19	-0.459136466094409	E9.5 vs E14.5
Naa15	Naa15	0.592356224756694	E9.5 vs E14.5
Nop56	Nop56	0.755829977469541	E9.5 vs E14.5
Tceanc	Tceanc	-0.468940429402654	E9.5 vs E14.5
Elavl1	Elavl1	0.62478246401118	E9.5 vs E14.5
Kcnk5	Kcnk5	-0.513583882466162	E9.5 vs E14.5
Nfat5	Nfat5	0.684181046800304	E9.5 vs E14.5
Kntc1	Kntc1	0.576744133934514	E9.5 vs E14.5
Pik3c2b	Pik3c2b	-0.505127427568588	E9.5 vs E14.5
E2f7	E2f7	0.654409408425546	E9.5 vs E14.5
Rbm26	Rbm26	0.728021678837879	E9.5 vs E14.5
Pde4d	Pde4d	-0.532979768512558	E9.5 vs E14.5
Sh3bgrl2	Sh3bgrl2	-0.45944134421727	E9.5 vs E14.5
Lamc1	Lamc1	-0.543272706164335	E9.5 vs E14.5
Trip12	Trip12	-0.303513777984622	E9.5 vs E14.5
Catspere2	Catspere2	-0.522150075228563	E9.5 vs E14.5
Prex1	Prex1	-0.48612204404912	E9.5 vs E14.5
Prdm2	Prdm2	-0.505305989412393	E9.5 vs E14.5
Dtx3	Dtx3	-0.568346815671013	E9.5 vs E14.5
Gramd2	Gramd2	0.546851752386982	E9.5 vs E14.5
Dip2b	Dip2b	-0.499438939277937	E9.5 vs E14.5
Wnk1	Wnk1	0.38525788975719	E9.5 vs E14.5
Flnb	Flnb	0.329627051081541	E9.5 vs E14.5
Creb3l2	Creb3l2	-0.518598002701421	E9.5 vs E14.5
Rapgef5	Rapgef5	-0.661015725408554	E9.5 vs E14.5
Atg2a	Atg2a	-0.508572392620313	E9.5 vs E14.5
Rnf115	Rnf115	-0.503028116004539	E9.5 vs E14.5
Grk2	Grk2	-0.55398154518356	E9.5 vs E14.5
Fgfr2	Fgfr2	-0.538128311882366	E9.5 vs E14.5
Elf4	Elf4	0.743131630226655	E9.5 vs E14.5
Hlcs	Hlcs	-0.510749465741901	E9.5 vs E14.5
Tbc1d5	Tbc1d5	0.525251088222227	E9.5 vs E14.5
Incenp	Incenp	0.530896144779411	E9.5 vs E14.5
Cdk1	Cdk1	0.563701355348405	E9.5 vs E14.5
Ptpn11	Ptpn11	-0.437922020090445	E9.5 vs E14.5
Pacsin2	Pacsin2	-0.406489404474832	E9.5 vs E14.5
Tnfrsf9	Tnfrsf9	-0.670921117954336	E9.5 vs E14.5
Syce2	Syce2	-0.44561154011573	E9.5 vs E14.5
Fxr1	Fxr1	0.606740742400799	E9.5 vs E14.5
Exo1	Exo1	0.511738221405558	E9.5 vs E14.5
Ddx3y	Ddx3y	-0.443266825565043	E9.5 vs E14.5
Xpo1	Xpo1	0.617132611386139	E9.5 vs E14.5
Gprc5c	Gprc5c	-0.509107822198233	E9.5 vs E14.5
Chd3	Chd3	-0.475823409603198	E9.5 vs E14.5
Sptlc2	Sptlc2	0.589706113533971	E9.5 vs E14.5
Parp4	Parp4	-0.503354594650944	E9.5 vs E14.5
Med12l	Med12l	0.995603950983431	E9.5 vs E14.5
Numb	Numb	0.376944403698955	E9.5 vs E14.5
Baz1a	Baz1a	0.678719153602652	E9.5 vs E14.5
Ctdspl2	Ctdspl2	0.654632487877205	E9.5 vs E14.5
Kif1b	Kif1b	0.806693906522166	E9.5 vs E14.5
Tpm4	Tpm4	0.585637337993319	E9.5 vs E14.5
Sh3pxd2a	Sh3pxd2a	-0.57329265477318	E9.5 vs E14.5
Tbc1d4	Tbc1d4	-0.455197098358899	E9.5 vs E14.5
Tnfaip8l1	Tnfaip8l1	-0.444489152685724	E9.5 vs E14.5
Ppargc1b	Ppargc1b	0.57107308773402	E9.5 vs E14.5
Cbx5	Cbx5	0.7650432700442	E9.5 vs E14.5
Phf14	Phf14	0.587204284900088	E9.5 vs E14.5
Ppfia1	Ppfia1	-0.471437620259591	E9.5 vs E14.5
Pdk1	Pdk1	-0.438458529569503	E9.5 vs E14.5
Dlc1	Dlc1	-0.456532935172908	E9.5 vs E14.5
Syne1	Syne1	0.752737681669731	E9.5 vs E14.5
Ino80	Ino80	0.651512043903723	E9.5 vs E14.5
Fyn	Fyn	-0.411066256823249	E9.5 vs E14.5
Xlr4b	Xlr4b	-0.484549865786469	E9.5 vs E14.5
Ube3c	Ube3c	0.677118833725516	E9.5 vs E14.5
D5Ertd579e	D5Ertd579e	-0.599985653842553	E9.5 vs E14.5
Gtf2f2	Gtf2f2	0.755984942951486	E9.5 vs E14.5
Fam129b	Fam129b	-0.435899345750797	E9.5 vs E14.5
Nap1l1	Nap1l1	0.7068097094402	E9.5 vs E14.5
Phip	Phip	0.581184970530333	E9.5 vs E14.5
H2-K1	H2-K1	-0.402326208917289	E9.5 vs E14.5
Fam102a	Fam102a	-0.504875107413481	E9.5 vs E14.5
Gpr137b	Gpr137b	-0.474775848799411	E9.5 vs E14.5
Crim1	Crim1	0.707344256309816	E9.5 vs E14.5
Sulf2	Sulf2	-0.530199060043923	E9.5 vs E14.5
Zc3h12c	Zc3h12c	-0.379471497021878	E9.5 vs E14.5
Akap7	Akap7	-0.562738425714185	E9.5 vs E14.5
Vps13b	Vps13b	0.43226674464748	E9.5 vs E14.5
Kdm6b	Kdm6b	-0.419223484476774	E9.5 vs E14.5
Tpx2	Tpx2	0.657346428593344	E9.5 vs E14.5
Samd4	Samd4	-0.555844198718593	E9.5 vs E14.5
Sh2b2	Sh2b2	0.454915228106427	E9.5 vs E14.5
Ptprs	Ptprs	0.453666933260901	E9.5 vs E14.5
Reps2	Reps2	-0.33768065820009	E9.5 vs E14.5
Ccny	Ccny	-0.46528025810922	E9.5 vs E14.5
Fer	Fer	0.539154687292563	E9.5 vs E14.5
Kif4	Kif4	0.616445630292021	E9.5 vs E14.5
Prkd3	Prkd3	-0.475368550366597	E9.5 vs E14.5
Platr4	Platr4	0.578695837878426	E9.5 vs E14.5
Eif2s3y	Eif2s3y	-0.432492547672614	E9.5 vs E14.5
Baz2b	Baz2b	-0.480789555366032	E9.5 vs E14.5
Ptms	Ptms	-0.455103342933794	E9.5 vs E14.5
Slc43a2	Slc43a2	-0.721132962035088	E9.5 vs E14.5
Hectd4	Hectd4	-0.457474829167228	E9.5 vs E14.5
Cse1l	Cse1l	0.636220176853262	E9.5 vs E14.5
Irs2	Irs2	-0.473772364097971	E9.5 vs E14.5
Nrbp1	Nrbp1	-0.456731026792163	E9.5 vs E14.5
Prrg4	Prrg4	-0.485199262171882	E9.5 vs E14.5
Csnk1g2	Csnk1g2	-0.384663376726435	E9.5 vs E14.5
Brip1os	Brip1os	0.687581644637275	E9.5 vs E14.5
Dnm2	Dnm2	-0.419053490614174	E9.5 vs E14.5
Egfr	Egfr	-0.643758310924391	E9.5 vs E14.5
Cdyl	Cdyl	0.424896242910637	E9.5 vs E14.5
Cdh3	Cdh3	0.504243590592509	E9.5 vs E14.5
Cnbp	Cnbp	0.628313788998087	E9.5 vs E14.5
Paxip1	Paxip1	0.498095150067748	E9.5 vs E14.5
Edc4	Edc4	-0.503624168825733	E9.5 vs E14.5
Trim27	Trim27	0.579667308309011	E9.5 vs E14.5
Bcas3	Bcas3	-0.508841835816863	E9.5 vs E14.5
Zim1	Zim1	-0.464491551227394	E9.5 vs E14.5
Rb1	Rb1	-0.408867650519335	E9.5 vs E14.5
Mtus1	Mtus1	-0.476578346740363	E9.5 vs E14.5
Tmem57	Tmem57	0.772224548967079	E9.5 vs E14.5
Sdccag8	Sdccag8	-0.531787599188617	E9.5 vs E14.5
Spin1	Spin1	-0.540429357875025	E9.5 vs E14.5
2700038G22Rik	2700038G22Rik	0.468179719817548	E9.5 vs E14.5
Btg2	Btg2	-0.404053246157451	E9.5 vs E14.5
Pola2	Pola2	0.501341362268216	E9.5 vs E14.5
Ptpn3	Ptpn3	-0.524876882641837	E9.5 vs E14.5
Usp37	Usp37	0.605024096197333	E9.5 vs E14.5
Ppard	Ppard	0.549043826294408	E9.5 vs E14.5
F11r	F11r	-0.506688858229979	E9.5 vs E14.5
Abca3	Abca3	-0.410602581025361	E9.5 vs E14.5
Gsn	Gsn	0.654623721955026	E9.5 vs E14.5
Prl8a8	Prl8a8	-0.417964466983341	E9.5 vs E14.5
Tcirg1	Tcirg1	0.575656482832672	E9.5 vs E14.5
Smad7	Smad7	0.57788809552371	E9.5 vs E14.5
Hspa8	Hspa8	0.664885168055498	E9.5 vs E14.5
Nop2	Nop2	0.466348021617962	E9.5 vs E14.5
Tsc22d1	Tsc22d1	-0.492175082366498	E9.5 vs E14.5
Znrf3	Znrf3	0.594033996731307	E9.5 vs E14.5
Pdlim7	Pdlim7	0.652023891760363	E9.5 vs E14.5
Bcl2l1	Bcl2l1	-0.61988072117495	E9.5 vs E14.5
Pltp	Pltp	0.637100360342186	E9.5 vs E14.5
Grb2	Grb2	-0.364032012370124	E9.5 vs E14.5
Tpd52	Tpd52	-0.504801297265672	E9.5 vs E14.5
Tlk2	Tlk2	0.611739680969545	E9.5 vs E14.5
Tfeb	Tfeb	-0.452055784482191	E9.5 vs E14.5
Camsap3	Camsap3	-0.366058745123855	E9.5 vs E14.5
Phf21a	Phf21a	-0.444020429134347	E9.5 vs E14.5
Sidt2	Sidt2	-0.472671577912414	E9.5 vs E14.5
Mbd5	Mbd5	0.49465169988142	E9.5 vs E14.5
Kifc1	Kifc1	0.521817481707766	E9.5 vs E14.5
Pkm	Pkm	0.626409961492899	E9.5 vs E14.5
Apobr	Apobr	-0.527177661291243	E9.5 vs E14.5
Dab1	Dab1	-0.463146877666325	E9.5 vs E14.5
Tef	Tef	-0.338760324013058	E9.5 vs E14.5
Sema3e	Sema3e	0.463105962914538	E9.5 vs E14.5
2610020C07Rik	2610020C07Rik	0.583454288563551	E9.5 vs E14.5
Fads6	Fads6	-0.462549215059438	E9.5 vs E14.5
Pabpc1	Pabpc1	0.653383038549186	E9.5 vs E14.5
Zdbf2	Zdbf2	-0.346857784688497	E9.5 vs E14.5
Wdhd1	Wdhd1	0.686640674560144	E9.5 vs E14.5
Sash1	Sash1	-0.458417638839778	E9.5 vs E14.5
Rpl3	Rpl3	0.556311807433154	E9.5 vs E14.5
Utrn	Utrn	0.734344838907213	E9.5 vs E14.5
Setd7	Setd7	0.616703192460817	E9.5 vs E14.5
Racgap1	Racgap1	0.511613589279867	E9.5 vs E14.5
Eif4b	Eif4b	0.549488781777071	E9.5 vs E14.5
Trim62	Trim62	-0.476415175279117	E9.5 vs E14.5
Ldlrap1	Ldlrap1	-0.468103139781088	E9.5 vs E14.5
Zwint	Zwint	0.499046123513031	E9.5 vs E14.5
Cmtm8	Cmtm8	0.591017292809021	E9.5 vs E14.5
Taf1	Taf1	0.618935371699994	E9.5 vs E14.5
Arvcf	Arvcf	-0.474164622414136	E9.5 vs E14.5
Ccne2	Ccne2	0.403772235435084	E9.5 vs E14.5
Arhgef11	Arhgef11	-0.494656309588612	E9.5 vs E14.5
Parpbp	Parpbp	0.551209212242423	E9.5 vs E14.5
Snrnp48	Snrnp48	0.673436141274658	E9.5 vs E14.5
Map7	Map7	-0.468436888117303	E9.5 vs E14.5
Smoc1	Smoc1	0.53828007609859	E9.5 vs E14.5
Ncapg2	Ncapg2	0.561535500772394	E9.5 vs E14.5
Ltbp3	Ltbp3	-0.348705031351561	E9.5 vs E14.5
Cenph	Cenph	0.508300680764749	E9.5 vs E14.5
Max	Max	-0.612570005580932	E9.5 vs E14.5
Myh10	Myh10	-0.500213789834356	E9.5 vs E14.5
Kif16b	Kif16b	-0.512337077149977	E9.5 vs E14.5
Supt5	Supt5	-0.517511407281468	E9.5 vs E14.5
Naa25	Naa25	0.621235571163541	E9.5 vs E14.5
Hspa4	Hspa4	0.496942754849013	E9.5 vs E14.5
Itga1	Itga1	-0.398924702738014	E9.5 vs E14.5
Gsr	Gsr	0.643082143665787	E9.5 vs E14.5
Wbp1l	Wbp1l	-0.540498873004579	E9.5 vs E14.5
Hbb-bh1	Hbb-bh1	0.430621542991343	E9.5 vs E14.5
Gm14005	Gm14005	0.546963189643277	E9.5 vs E14.5
2410018L13Rik	2410018L13Rik	0.525092618363057	E9.5 vs E14.5
Bicral	Bicral	-0.410990512668117	E9.5 vs E14.5
Zfp131	Zfp131	0.673012217940035	E9.5 vs E14.5
Apbb2	Apbb2	-0.358794204985803	E9.5 vs E14.5
Maged1	Maged1	-0.536322649978432	E9.5 vs E14.5
Gmps	Gmps	0.57615377758672	E9.5 vs E14.5
Nln	Nln	0.611860544223806	E9.5 vs E14.5
Wac	Wac	0.552161563337323	E9.5 vs E14.5
Chd7	Chd7	-0.333091721035428	E9.5 vs E14.5
Birc5	Birc5	0.490674084006867	E9.5 vs E14.5
Pinx1	Pinx1	0.517728949158629	E9.5 vs E14.5
Tiam1	Tiam1	0.470456196628751	E9.5 vs E14.5
Lrpprc	Lrpprc	0.5334611437801	E9.5 vs E14.5
Rad51b	Rad51b	0.689224185517452	E9.5 vs E14.5
Sin3b	Sin3b	-0.397248467817136	E9.5 vs E14.5
Celf2	Celf2	-0.44280366604835	E9.5 vs E14.5
Mthfr	Mthfr	-0.444108847259839	E9.5 vs E14.5
Bora	Bora	0.53322154119934	E9.5 vs E14.5
Arhgef3	Arhgef3	-0.511025996869236	E9.5 vs E14.5
Rngtt	Rngtt	0.601572326569452	E9.5 vs E14.5
Pkig	Pkig	-0.55184633882676	E9.5 vs E14.5
Chka	Chka	0.648689724796104	E9.5 vs E14.5
Adap1	Adap1	0.432172779429371	E9.5 vs E14.5
Hmmr	Hmmr	0.437928405474763	E9.5 vs E14.5
Cep192	Cep192	0.612272394448891	E9.5 vs E14.5
Ddx58	Ddx58	-0.42726666521768	E9.5 vs E14.5
Zbtb7c	Zbtb7c	0.817868526604633	E9.5 vs E14.5
Agk	Agk	0.655556153630197	E9.5 vs E14.5
Prr12	Prr12	0.516036331518482	E9.5 vs E14.5
Ciapin1	Ciapin1	0.565888715493952	E9.5 vs E14.5
Car4	Car4	-0.412818398268075	E9.5 vs E14.5
Psg28	Psg28	-0.353891175280406	E9.5 vs E14.5
Dmd	Dmd	-0.476618303628166	E9.5 vs E14.5
Mprip	Mprip	-0.363462878247782	E9.5 vs E14.5
Usp7	Usp7	0.445332983193219	E9.5 vs E14.5
Esyt3	Esyt3	0.506864065288452	E9.5 vs E14.5
Abca1	Abca1	-0.374758983724549	E9.5 vs E14.5
Sfswap	Sfswap	0.52762681264711	E9.5 vs E14.5
Mb21d2	Mb21d2	0.579959441543945	E9.5 vs E14.5
Ptk2	Ptk2	0.445614815570135	E9.5 vs E14.5
Brip1	Brip1	0.513043898593826	E9.5 vs E14.5
Cecr2	Cecr2	0.493193207435234	E9.5 vs E14.5
Capns1	Capns1	-0.541185240541255	E9.5 vs E14.5
Cdc14a	Cdc14a	0.56415872219809	E9.5 vs E14.5
Mtdh	Mtdh	0.552592313013329	E9.5 vs E14.5
Stil	Stil	0.530495445909121	E9.5 vs E14.5
Satb1	Satb1	0.708952886846521	E9.5 vs E14.5
Unc5b	Unc5b	-0.49306982482751	E9.5 vs E14.5
Adck5	Adck5	-0.446105727740753	E9.5 vs E14.5
Orc1	Orc1	0.39333628856711	E9.5 vs E14.5
Asf1b	Asf1b	0.391486317120907	E9.5 vs E14.5
Chpt1	Chpt1	-0.558572705191128	E9.5 vs E14.5
Etv5	Etv5	-0.331219089166703	E9.5 vs E14.5
Dcbld2	Dcbld2	0.53028105007351	E9.5 vs E14.5
Tead1	Tead1	-0.389845981170128	E9.5 vs E14.5
Col4a2	Col4a2	-0.423454962973161	E9.5 vs E14.5
Mapk1	Mapk1	0.547664832012629	E9.5 vs E14.5
Cab39l	Cab39l	0.683087938591568	E9.5 vs E14.5
Ddx21	Ddx21	0.504599364532702	E9.5 vs E14.5
Ptpn13	Ptpn13	-0.455516921758991	E9.5 vs E14.5
Mgll	Mgll	-0.381182756689532	E9.5 vs E14.5
Plekhg1	Plekhg1	-0.438211226683332	E9.5 vs E14.5
Hsph1	Hsph1	0.569545090055565	E9.5 vs E14.5
Pter	Pter	0.451429429838153	E9.5 vs E14.5
Rad54l	Rad54l	0.356955732490888	E9.5 vs E14.5
AU015836	AU015836	-0.386406520133134	E9.5 vs E14.5
Nucks1	Nucks1	0.607952204378268	E9.5 vs E14.5
Ankrd13a	Ankrd13a	-0.414373141197069	E9.5 vs E14.5
4933402E13Rik	4933402E13Rik	-0.312785319906801	E9.5 vs E14.5
Dnajc8	Dnajc8	-0.510162649308645	E9.5 vs E14.5
Sorbs2	Sorbs2	-0.33917169928902	E9.5 vs E14.5
Igfbp7	Igfbp7	-0.419639111227695	E9.5 vs E14.5
Nhs	Nhs	0.625782084361045	E9.5 vs E14.5
Rpl4	Rpl4	0.463612027255236	E9.5 vs E14.5
Ahnak	Ahnak	-0.453382940639926	E9.5 vs E14.5
Wasf2	Wasf2	-0.44081407028322	E9.5 vs E14.5
Cdc25a	Cdc25a	0.477065420192275	E9.5 vs E14.5
4930402H24Rik	4930402H24Rik	-0.385013377078705	E9.5 vs E14.5
Pcbp3	Pcbp3	0.757364307673023	E9.5 vs E14.5
Kif14	Kif14	0.477822353096972	E9.5 vs E14.5
Ankrd44	Ankrd44	-0.39111187821746	E9.5 vs E14.5
Slc22a21	Slc22a21	0.438545586401072	E9.5 vs E14.5
Smtn	Smtn	-0.463688111386039	E9.5 vs E14.5
