# Supplementary material for: Single nuclei RNA-seq of mouse placental labyrinth development
Source: eLife. 2020 Nov 3;9:e60266. doi: 10.7554/eLife.60266 (PMC7669270; doi:10.7554/eLife.60266)
Supplement: Figure 4—source data 1. [file elife-60266-fig4-data1.csv]

	p_val	avg_logFC	pct.1	pct.2	p_val_adj	cluster	gene
Frmd4b	0	2.74427079738184	0.949	0.28	0	SynTII	Frmd4b
Abcb1b	0	2.49664474585057	0.855	0.076	0	SynTII	Abcb1b
Slc13a4	0	2.27266012154454	0.837	0.054	0	SynTII	Slc13a4
Igf1r	0	2.21991424816307	0.937	0.387	0	SynTII	Igf1r
Gcgr	0	2.20813030470408	0.753	0.04	0	SynTII	Gcgr
Slc1a5	0	2.1810064425671	0.763	0.092	0	SynTII	Slc1a5
Galnt18	0	2.13581684609685	0.768	0.077	0	SynTII	Galnt18
Vegfa	0	2.07962342776363	0.775	0.092	0	SynTII	Vegfa
Slc22a3	0	2.04628122053081	0.843	0.205	0	SynTII	Slc22a3
Bcorl1	0	2.03029699796419	0.724	0.025	0	SynTII	Bcorl1
Tmem150a	0	2.01443657801869	0.942	0.497	0	SynTII	Tmem150a
Ptprm	0	2.00777854073827	0.931	0.438	0	SynTII	Ptprm
Slc7a2	0	1.94997443421428	0.672	0.05	0	SynTII	Slc7a2
Lama5	0	1.94298246379237	0.863	0.243	0	SynTII	Lama5
Atxn1	0	1.90827207158847	0.757	0.157	0	SynTII	Atxn1
Airn	0	1.81891555519903	0.971	0.756	0	SynTII	Airn
Shisa7	0	1.75728363754257	0.569	0.016	0	SynTII	Shisa7
Gramd4	0	1.73063933555142	0.69	0.119	0	SynTII	Gramd4
Gm4593	0	1.72716034300246	0.578	0.02	0	SynTII	Gm4593
Zfhx3	0	1.71507764675635	0.972	0.74	0	SynTII	Zfhx3
Cacna1b	0	1.7073998693231	0.533	0.029	0	SynTII	Cacna1b
Col13a1	0	1.58182049332805	0.515	0.025	0	SynTII	Col13a1
Tbx3	0	1.49752973300896	0.596	0.046	0	SynTII	Tbx3
Abcb1a	0	1.41871443257076	0.522	0.035	0	SynTII	Abcb1a
Itgb4	0	1.40427130069789	0.482	0.033	0	SynTII	Itgb4
Gcm1	0	1.39707103859795	0.509	0.019	0	SynTII	Gcm1
Wfdc2	0	1.37913662369122	0.513	0.027	0	SynTII	Wfdc2
Igdcc3	0	1.36209341111293	0.484	0.011	0	SynTII	Igdcc3
Slc16a12	0	1.31104025135522	0.455	0.014	0	SynTII	Slc16a12
Igfbp2	0	1.24745371492558	0.44	0.019	0	SynTII	Igfbp2
Slc16a3	8.48822133283732e-292	1.1764389987624	0.439	0.026	1.82607105533329e-287	SynTII	Slc16a3
Synb	2.53733149944527e-290	1.19251759653654	0.394	0.014	5.4585612547566e-286	SynTII	Synb
Prdm16	5.59771598778089e-287	1.50989775187726	0.408	0.019	1.2042366404513e-282	SynTII	Prdm16
B4galt5	3.57760009608705e-284	1.39655538785216	0.619	0.107	7.69649108671206e-280	SynTII	B4galt5
Lamc1	5.0638513964843e-283	1.58373642492523	0.866	0.411	1.08938635092567e-278	SynTII	Lamc1
Lpcat3	8.95221220689923e-281	1.59040345173332	0.763	0.237	1.92588941207023e-276	SynTII	Lpcat3
Slc16a10	2.7791783268107e-280	1.62990683883403	0.625	0.119	5.97884633446785e-276	SynTII	Slc16a10
Arap3	3.56111327883207e-277	1.32335123325012	0.472	0.043	7.66102299675143e-273	SynTII	Arap3
Lrrc1	9.70167528300942e-270	1.48062070112499	0.777	0.255	2.08712140363382e-265	SynTII	Lrrc1
Tcf7l2	7.87781456955108e-268	1.34835939705709	0.945	0.659	1.69475424834752e-263	SynTII	Tcf7l2
Nid2	7.88755391290457e-268	1.23522207974492	0.457	0.041	1.69684947328316e-263	SynTII	Nid2
Apela	4.14145490475977e-257	0.997301534020901	0.354	0.013	8.9095119366097e-253	SynTII	Apela
Gm42418	2.19957173711238e-256	0.942412544433403	0.999	1	4.73193867804987e-252	SynTII	Gm42418
Cyp2s1	2.76408943338692e-253	1.01605370355935	0.332	0.009	5.94638559804528e-249	SynTII	Cyp2s1
Tom1l1	7.61748510795395e-253	1.15201940259131	0.461	0.047	1.63874957127413e-248	SynTII	Tom1l1
Slc7a6	7.5667205092645e-249	1.05844368884677	0.388	0.024	1.62782858315807e-244	SynTII	Slc7a6
Tmprss2	2.97404681523447e-247	1.2301866389161	0.484	0.059	6.39806691361392e-243	SynTII	Tmprss2
Mllt3	3.5596508533185e-245	1.43193917258389	0.59	0.116	7.65787688074408e-241	SynTII	Mllt3
Slc4a2	1.89268914256551e-238	1.40890080746931	0.867	0.463	4.07174215240117e-234	SynTII	Slc4a2
St14	9.12138725069498e-236	1.14299106688774	0.428	0.043	1.96228403924201e-231	SynTII	St14
Trp63	3.68969832539831e-234	1.04213226869929	0.303	0.007	7.93764800742939e-230	SynTII	Trp63
Tbx3os1	3.93872697107529e-232	0.972392340282886	0.32	0.011	8.47338333287426e-228	SynTII	Tbx3os1
Synj2	2.70931449821079e-226	1.08159619218695	0.382	0.031	5.82854828000087e-222	SynTII	Synj2
Samd12	5.5237151938838e-225	1.59500370217358	0.528	0.096	1.18831684966022e-220	SynTII	Samd12
Slc38a4	6.36202941376713e-224	1.29295441219046	0.848	0.451	1.36866338778372e-219	SynTII	Slc38a4
Zhx2	1.05923787102339e-221	1.03025797304006	0.342	0.02	2.27873843193261e-217	SynTII	Zhx2
Map7	1.16621417941695e-219	1.37020716349883	0.798	0.374	2.50887656417968e-215	SynTII	Map7
Gabrp	2.32787785759533e-219	0.840203063409977	0.302	0.01	5.00796363504482e-215	SynTII	Gabrp
Ltc4s	9.82633777756348e-218	0.89810283340941	0.281	0.006	2.11394004608723e-213	SynTII	Ltc4s
Hes7	2.58393036799433e-216	0.912670925039272	0.297	0.01	5.55880940066621e-212	SynTII	Hes7
Cmip	1.81770990768586e-214	1.49461546514346	0.781	0.336	3.91043932440459e-210	SynTII	Cmip
Cnpy1	2.36503537116245e-214	1.04804790216404	0.337	0.021	5.08790059398177e-210	SynTII	Cnpy1
Fam129b	3.29766670315937e-201	1.18489020297762	0.923	0.638	7.09427037850676e-197	SynTII	Fam129b
Pdzk1	2.26966323174256e-199	1.11608263357401	0.391	0.045	4.88272651044777e-195	SynTII	Pdzk1
Bcar3	8.15362507387229e-197	1.24807844984857	0.837	0.478	1.75408936214215e-192	SynTII	Bcar3
D7Ertd443e	4.42573860838544e-194	0.903472775247836	0.268	0.009	9.52109146821959e-190	SynTII	D7Ertd443e
Ank3	5.18868423934679e-194	1.14641151726324	0.434	0.065	1.11624164041067e-189	SynTII	Ank3
Cdh1	9.20101174352405e-194	1.28837570447605	0.78	0.371	1.97941365638433e-189	SynTII	Cdh1
Fhod3	2.0384614051988e-192	0.92796143206568	0.337	0.028	4.38534202100418e-188	SynTII	Fhod3
Pcsk6	2.34333181238634e-188	1.1632680828313	0.366	0.04	5.04120972798673e-184	SynTII	Pcsk6
Lrrfip1	4.08060767598847e-182	1.14372029265252	0.506	0.108	8.778611293354e-178	SynTII	Lrrfip1
Suv39h1	1.03791387673531e-181	0.867521800683457	0.347	0.035	2.23286412302068e-177	SynTII	Suv39h1
Ccdc57	2.79256187510488e-179	1.11884901056278	0.439	0.077	6.00763836191314e-175	SynTII	Ccdc57
Grik5	2.70820787390346e-178	1.05949317414366	0.442	0.077	5.82616759912851e-174	SynTII	Grik5
Iqsec2	8.00137558280556e-176	0.986185577819969	0.343	0.037	1.72133592912896e-171	SynTII	Iqsec2
Tceanc	1.54990506663816e-175	1.17075951105264	0.499	0.111	3.33431076985868e-171	SynTII	Tceanc
C77080	2.87665865250165e-175	0.920253812366427	0.353	0.04	6.18855575912679e-171	SynTII	C77080
Rph3al	3.4105384884986e-174	0.811366080051339	0.268	0.014	7.33709145030704e-170	SynTII	Rph3al
Vtcn1	3.39139641838365e-171	1.05308000433378	0.354	0.043	7.29591111486875e-167	SynTII	Vtcn1
Pla2r1	4.38953114984715e-169	1.02772295977147	0.343	0.039	9.44319836266618e-165	SynTII	Pla2r1
Ranbp17	3.18646096095852e-168	1.32332422002058	0.749	0.384	6.85503346531006e-164	SynTII	Ranbp17
Ptpn14	4.24772876256313e-165	1.18293228412135	0.443	0.088	9.13813888690205e-161	SynTII	Ptpn14
Ptprg	4.69052690604768e-161	1.48464821901447	0.566	0.18	1.00907305329804e-156	SynTII	Ptprg
Nfix	1.05692842929276e-158	0.861336204240744	0.255	0.016	2.27377012993751e-154	SynTII	Nfix
Pde8a	1.472855515882e-158	1.10986125061491	0.614	0.21	3.16855407131694e-154	SynTII	Pde8a
Iqgap1	1.21366623117011e-154	0.921353132454941	0.875	0.693	2.61096016311626e-150	SynTII	Iqgap1
Nkain2	1.80254598351484e-153	1.35945763455605	0.703	0.319	3.87781717433547e-149	SynTII	Nkain2
Plcd3	1.63389416371113e-152	1.04092064339188	0.451	0.101	3.51499651439175e-148	SynTII	Plcd3
Sik1	1.97451194934029e-152	0.811599931448615	0.31	0.035	4.24776755661578e-148	SynTII	Sik1
Dip2c	2.40648094807277e-152	1.13156544863718	0.899	0.744	5.17706246358895e-148	SynTII	Dip2c
Tmem63b	1.20220363424281e-151	1.08413803729327	0.496	0.131	2.58630067834656e-147	SynTII	Tmem63b
Slc29a1	1.26722324953079e-149	0.84458091260461	0.331	0.044	2.7261773767156e-145	SynTII	Slc29a1
Epb41l4b	3.41068515270882e-148	0.96539915168682	0.339	0.049	7.33740696902249e-144	SynTII	Epb41l4b
Ppp3ca	1.07263525802577e-147	1.06803653827348	0.807	0.517	2.30756023059083e-143	SynTII	Ppp3ca
Rab11fip1	1.09709745012288e-146	1.07801346524535	0.501	0.141	2.36018574444936e-142	SynTII	Rab11fip1
Smoc1	3.02531288563352e-146	1.17561299685669	0.595	0.216	6.50835561086339e-142	SynTII	Smoc1
Tcn2	8.75613056394877e-145	0.884621140121375	0.307	0.038	1.8837063682223e-140	SynTII	Tcn2
Sipa1l3	6.35615198807234e-136	1.0563750603991	0.737	0.413	1.367398977194e-131	SynTII	Sipa1l3
Tmem8	1.39116176870352e-133	0.796743675621343	0.269	0.029	2.99280631301188e-129	SynTII	Tmem8
Itga3	1.03363442126154e-132	1.06230605354485	0.496	0.153	2.22365773045995e-128	SynTII	Itga3
Lrrc8d	5.55603241212933e-132	0.988571224139151	0.774	0.471	1.19526925282138e-127	SynTII	Lrrc8d
Med25	6.32604957203159e-130	0.969093506253541	0.464	0.129	1.36092304443116e-125	SynTII	Med25
Stmn1	4.23808226643995e-129	0.899570380922808	0.369	0.073	9.11738637979226e-125	SynTII	Stmn1
Adipor2	5.16402674243657e-127	1.15100709169193	0.552	0.215	1.11093707310038e-122	SynTII	Adipor2
Gm26917	9.50994530211787e-127	0.638863110044408	0.987	0.992	2.04587453284462e-122	SynTII	Gm26917
Gm26542	1.54985467926633e-125	1.11259148674609	0.668	0.319	3.33420237150567e-121	SynTII	Gm26542
Gata2	2.65352376959184e-121	0.990785999068725	0.586	0.243	5.70852568552293e-117	SynTII	Gata2
Tesk2	7.1239257611195e-120	0.999612847531573	0.426	0.114	1.53257014898964e-115	SynTII	Tesk2
Rrbp1	9.83812069723913e-120	0.734015703492884	0.889	0.726	2.11647490559705e-115	SynTII	Rrbp1
Smad3	2.36686032379071e-119	1.02687844972841	0.388	0.093	5.09182661457095e-115	SynTII	Smad3
Chka	5.62659129634952e-117	0.999487950412581	0.477	0.154	1.21044858558367e-112	SynTII	Chka
Rab31	5.77048342558562e-117	1.01866085534108	0.397	0.1	1.24140409934623e-112	SynTII	Rab31
Man1c1	2.5555954655619e-116	0.96184241031449	0.619	0.25	5.49785252506333e-112	SynTII	Man1c1
Slc22a17	1.43890937290836e-115	0.927804986092858	0.393	0.098	3.09552573393775e-111	SynTII	Slc22a17
Trim71	7.56688742510852e-115	0.964264707805243	0.526	0.199	1.62786449176359e-110	SynTII	Trim71
Emb	8.33536501318926e-114	0.943613705683137	0.393	0.099	1.79318707528741e-109	SynTII	Emb
Nrxn3	1.43300662920166e-112	1.46475372616997	0.311	0.059	3.08282716140154e-108	SynTII	Nrxn3
Nomo1	6.22655063349061e-112	0.860010912901793	0.439	0.131	1.33951783778283e-107	SynTII	Nomo1
Sorbs1	1.62304592048908e-111	0.62362807340439	0.939	0.911	3.49165868874815e-107	SynTII	Sorbs1
Lrp5	8.53590498782225e-111	0.924926911740813	0.422	0.122	1.8363292400302e-106	SynTII	Lrp5
Farp1	1.52830661783423e-109	0.748596139272994	0.808	0.45	3.28784602694678e-105	SynTII	Farp1
Ppm1l	3.41109021514552e-109	0.999911249525928	0.371	0.092	7.33827837984257e-105	SynTII	Ppm1l
Iffo2	7.33093551125978e-108	0.798192412905604	0.327	0.068	1.57710415653732e-103	SynTII	Iffo2
Peak1	3.6558123605691e-106	0.689384852504115	0.917	0.78	7.8647491312923e-102	SynTII	Peak1
Scarb1	8.47899526281204e-103	0.849702468981825	0.437	0.135	1.82408625088875e-98	SynTII	Scarb1
Pls3	8.18004632396473e-102	0.796226009897133	0.299	0.059	1.75977336567453e-97	SynTII	Pls3
Plac1	1.89548739536499e-100	1.07244994602026	0.608	0.303	4.0777620336487e-96	SynTII	Plac1
Znrf3	1.23662942646899e-99	1.04669887647517	0.535	0.225	2.66036088516274e-95	SynTII	Znrf3
Dcun1d4	2.59889828434342e-99	0.84129291537415	0.387	0.11	5.59100987910801e-95	SynTII	Dcun1d4
Lrrk1	3.9609548405143e-99	0.745382510480754	0.286	0.054	8.52120214839841e-95	SynTII	Lrrk1
Ctdspl	9.03282145693769e-99	0.667660440423214	0.908	0.69	1.94323088003101e-94	SynTII	Ctdspl
Usp24	2.82634838906828e-98	0.827279365915262	0.734	0.482	6.08032328940259e-94	SynTII	Usp24
Pitpnm2	1.40716048952941e-97	0.671115855842587	0.633	0.246	3.02722436112461e-93	SynTII	Pitpnm2
Baz1a	1.15088307000342e-95	0.80813825387059	0.384	0.11	2.47589474849836e-91	SynTII	Baz1a
Ptpre	1.45128212222929e-94	0.852511342491371	0.477	0.17	3.12214322955187e-90	SynTII	Ptpre
Map4k2	4.11255276974724e-94	0.709505811151713	0.294	0.062	8.84733477355724e-90	SynTII	Map4k2
H19	6.03925444965146e-94	0.898401307746005	0.629	0.33	1.29922480975352e-89	SynTII	H19
Adcy9	1.98227412851146e-93	0.909882052237518	0.601	0.307	4.26446633266671e-89	SynTII	Adcy9
Cachd1	2.04744593126675e-93	0.778449082742102	0.276	0.054	4.40467043193417e-89	SynTII	Cachd1
Ncor2	6.9564531899608e-92	0.853206819964168	0.42	0.142	1.49654177475627e-87	SynTII	Ncor2
Sipa1l1	1.68737563342396e-91	0.712133826807706	0.781	0.476	3.63005120018496e-87	SynTII	Sipa1l1
Cobll1	9.26922185286242e-90	0.595253395003065	0.792	0.424	1.99408769720629e-85	SynTII	Cobll1
Abca3	3.02507507242806e-89	0.849725562906706	0.46	0.175	6.50784400331447e-85	SynTII	Abca3
Trpv2	3.91844656955377e-89	0.839566825936355	0.41	0.137	8.42975410508103e-85	SynTII	Trpv2
Tacc1	1.21351812726943e-87	0.873311836561947	0.569	0.281	2.61064154719472e-83	SynTII	Tacc1
Cables1	2.10628310020877e-87	0.819914566407189	0.388	0.124	4.53124683347912e-83	SynTII	Cables1
Ank	3.82475573180749e-86	0.709679884552009	0.858	0.707	8.22819700583744e-82	SynTII	Ank
Susd6	1.74142020908311e-85	0.772402518375645	0.751	0.553	3.7463172958005e-81	SynTII	Susd6
Mpped2	8.12569253276892e-85	0.98657418274798	0.403	0.137	1.74808023457458e-80	SynTII	Mpped2
Hs2st1	4.11824954140198e-84	0.933594752301673	0.589	0.314	8.85959023841808e-80	SynTII	Hs2st1
Brwd3	4.66226238682625e-84	0.858722734113949	0.575	0.308	1.00299250727793e-79	SynTII	Brwd3
Tsix	6.27666544402104e-84	0.778061123252746	0.348	0.101	1.35029903697225e-79	SynTII	Tsix
Tet3	1.00244838752273e-83	0.86629793663204	0.554	0.277	2.15656721607765e-79	SynTII	Tet3
Zfp185	3.65753979840222e-83	0.679976556133488	0.276	0.06	7.86846536830269e-79	SynTII	Zfp185
Usp46	6.06174636048801e-83	0.849967829623949	0.607	0.333	1.30406349453178e-78	SynTII	Usp46
Agpat3	6.68793696598663e-83	0.809996688667836	0.528	0.24	1.4387758794927e-78	SynTII	Agpat3
Slc22a18	1.97110695755142e-81	0.806657806156554	0.551	0.259	4.24044239778037e-77	SynTII	Slc22a18
Capn1	2.86373393981389e-81	0.749539876306353	0.293	0.072	6.16075082472162e-77	SynTII	Capn1
Pdlim7	2.26562628445809e-80	0.76402439681034	0.415	0.151	4.87404182575469e-76	SynTII	Pdlim7
Dse	3.80374977143409e-80	0.683280321711402	0.273	0.062	8.18300688328616e-76	SynTII	Dse
Gpat3	3.09592530761732e-79	0.736837220825468	0.318	0.088	6.66026411427713e-75	SynTII	Gpat3
Taldo1	3.48094197132919e-79	0.656187371500412	0.286	0.069	7.48855046292049e-75	SynTII	Taldo1
Srebf2	1.33829950432798e-78	0.744255483396679	0.366	0.117	2.87908372366078e-74	SynTII	Srebf2
Arhgap44	5.01785970220758e-77	0.819512381954586	0.687	0.439	1.07949215773592e-72	SynTII	Arhgap44
Tgm2	5.68804048207805e-77	0.776117009738597	0.653	0.421	1.22366814890945e-72	SynTII	Tgm2
Egfr	1.08411636919841e-76	0.859444555190429	0.406	0.151	2.33225954505655e-72	SynTII	Egfr
Col23a1	4.56619940285143e-76	0.995421938759925	0.311	0.091	9.82326477535429e-72	SynTII	Col23a1
Wipf1	1.68393129822719e-75	0.850148740274496	0.541	0.272	3.62264140187615e-71	SynTII	Wipf1
Zmiz1	4.01290726801991e-75	0.664245666230025	0.797	0.613	8.63296740569122e-71	SynTII	Zmiz1
Tbc1d22b	6.55019255190778e-75	0.779216732718862	0.456	0.195	1.40914292369192e-70	SynTII	Tbc1d22b
Cfap43	6.58255959348852e-74	0.669669498435669	0.31	0.087	1.41610604534718e-69	SynTII	Cfap43
Stard5	3.05242516336301e-73	0.670446699129384	0.292	0.077	6.56668225394284e-69	SynTII	Stard5
Rbm47	7.20603750309412e-73	0.6455410354159	0.839	0.748	1.55023484804064e-68	SynTII	Rbm47
Zfp697	4.50764475734509e-72	0.771517565563872	0.609	0.362	9.69729616647649e-68	SynTII	Zfp697
Rbfox2	6.41743337152337e-72	0.724074542658005	0.738	0.577	1.38058244121582e-67	SynTII	Rbfox2
Arf5	4.42402211475027e-71	0.853028918260763	0.494	0.247	9.51739877546225e-67	SynTII	Arf5
Pola2	6.91248470462407e-71	0.63050291320336	0.283	0.076	1.48708283450578e-66	SynTII	Pola2
Cmtm8	9.13429523234324e-71	0.703826219369395	0.3	0.086	1.965060933334e-66	SynTII	Cmtm8
Hacd2	5.21578932984846e-70	0.803596607384397	0.473	0.222	1.1220727585303e-65	SynTII	Hacd2
Slc25a13	1.46819979853152e-69	0.704721627840412	0.426	0.173	3.15853822658086e-65	SynTII	Slc25a13
Gm16867	4.88910375549125e-69	0.718707284054171	0.3	0.089	1.05179289091883e-64	SynTII	Gm16867
Maml2	2.25308153313851e-68	0.986588005915781	0.418	0.18	4.84705430224088e-64	SynTII	Maml2
Tle3	9.60368752228443e-68	0.783379315243728	0.566	0.324	2.06604129666905e-63	SynTII	Tle3
Piezo1	1.14126253231172e-66	0.779471253551623	0.484	0.241	2.45519808576221e-62	SynTII	Piezo1
Slc8b1	5.11810690370587e-66	0.767636418275381	0.406	0.165	1.10105833819424e-61	SynTII	Slc8b1
Elmsan1	6.81713073306745e-66	0.76429938107966	0.569	0.332	1.4665693346048e-61	SynTII	Elmsan1
Pde7a	8.62786995505961e-66	0.654984587160856	0.331	0.111	1.85611366343197e-61	SynTII	Pde7a
Phldb2	1.04549107702079e-65	0.746237152244676	0.583	0.343	2.24916495399483e-61	SynTII	Phldb2
Rufy1	8.86525072759237e-65	0.659763397622995	0.285	0.084	1.90718138902695e-60	SynTII	Rufy1
Pafah2	9.16215478445028e-64	0.648007660705995	0.319	0.105	1.97105435877879e-59	SynTII	Pafah2
Fabp3	1.26201989923337e-63	0.747088034675226	0.471	0.224	2.71498340922076e-59	SynTII	Fabp3
Got1	1.34436973099467e-63	0.596042056757589	0.282	0.082	2.89214260228883e-59	SynTII	Got1
St6gal1	4.60539776076546e-62	0.850569997178856	0.438	0.202	9.90759220273474e-58	SynTII	St6gal1
Vgll4	8.14102410196978e-62	0.564850591658477	0.881	0.725	1.75137851505676e-57	SynTII	Vgll4
Sema4c	2.76367129279964e-61	0.615008194372855	0.282	0.085	5.94548605219986e-57	SynTII	Sema4c
Plekha7	7.50171269983605e-61	0.422743485766181	0.944	0.941	1.61384345311573e-56	SynTII	Plekha7
Srgap1	1.14503300346386e-60	0.791387000321042	0.519	0.286	2.46330950035179e-56	SynTII	Srgap1
Gcn1l1	1.52335337315842e-60	0.698135247472631	0.658	0.471	3.27719011167571e-56	SynTII	Gcn1l1
Slc2a1	1.62250056096775e-60	0.594364594526872	0.73	0.537	3.49048545680992e-56	SynTII	Slc2a1
Anks1	4.42521040654574e-60	0.716717926587572	0.644	0.449	9.51995514760184e-56	SynTII	Anks1
Rtn1	6.50211028576188e-60	0.811953562381212	0.663	0.474	1.39879898577595e-55	SynTII	Rtn1
Soat1	1.64955006757806e-59	0.682205515220191	0.342	0.128	3.54867706038067e-55	SynTII	Soat1
Igf2bp3	1.84448194905593e-59	0.699603135959311	0.563	0.329	3.96803401700401e-55	SynTII	Igf2bp3
Cdc42bpg	2.32031909682377e-59	0.640447939806916	0.319	0.112	4.99170247299698e-55	SynTII	Cdc42bpg
Usp39	4.60945816593968e-59	0.63216048079162	0.332	0.12	9.91632735238604e-55	SynTII	Usp39
Uba6	2.38784876400096e-58	0.634516882033757	0.735	0.596	5.13697904599528e-54	SynTII	Uba6
Ube2e2	3.2575224475023e-58	0.639790188373286	0.743	0.573	7.00790804131169e-54	SynTII	Ube2e2
Cers6	7.99553325368665e-56	0.688897337692493	0.535	0.296	1.72007906886561e-51	SynTII	Cers6
Acsl4	1.61949201471132e-55	0.73865639916997	0.473	0.254	3.48401317124845e-51	SynTII	Acsl4
Ppargc1b	1.85233487347079e-55	0.688218251155138	0.584	0.352	3.98492801329771e-51	SynTII	Ppargc1b
Dtnb	1.24785100675614e-53	0.737350064036636	0.459	0.242	2.68450187083448e-49	SynTII	Dtnb
Suco	3.33309146803925e-52	0.722044905136113	0.511	0.302	7.17047967519284e-48	SynTII	Suco
Gpc6	9.98647572052552e-51	0.866240576196156	0.376	0.174	2.14839052175666e-46	SynTII	Gpc6
Zcchc14	2.48647022005693e-50	0.590717250111936	0.614	0.405	5.34914338440847e-46	SynTII	Zcchc14
Camsap3	3.23349129056311e-50	0.626796245288258	0.327	0.134	6.95620981338841e-46	SynTII	Camsap3
Rnf19a	4.07908728049415e-50	0.670968920416439	0.359	0.16	8.77534046652706e-46	SynTII	Rnf19a
Igf2r	5.90376732341832e-50	0.649598819102123	0.451	0.24	1.27007746428698e-45	SynTII	Igf2r
Larp1b	4.54644226234461e-48	0.604926277651335	0.37	0.166	9.78076123898197e-44	SynTII	Larp1b
Gm28153	1.05533544310969e-47	0.68462604707549	0.588	0.381	2.27034313876188e-43	SynTII	Gm28153
Rab2b	1.08490843310611e-47	0.636259834253846	0.318	0.129	2.33396351214117e-43	SynTII	Rab2b
Agap1	2.68914472495452e-47	0.734544335936787	0.675	0.535	5.78515704679467e-43	SynTII	Agap1
Kremen1	4.07039373500467e-47	0.628344522118086	0.381	0.18	8.75663804211555e-43	SynTII	Kremen1
Dgkh	8.53420339009344e-46	0.668112355007156	0.255	0.089	1.8359631753108e-41	SynTII	Dgkh
Por	2.0634274080906e-45	0.652925570666081	0.493	0.293	4.43905138302531e-41	SynTII	Por
Nedd4	5.71762547342122e-45	0.512305346299479	0.723	0.581	1.23003276809711e-40	SynTII	Nedd4
Zmynd8	7.72479251358784e-45	0.58955718423894	0.634	0.48	1.66183461344815e-40	SynTII	Zmynd8
Baiap2	9.21592056547532e-45	0.69025360286806	0.507	0.32	1.98262099125071e-40	SynTII	Baiap2
Mxi1	1.24396865683752e-44	0.625636620580065	0.294	0.118	2.67614977145456e-40	SynTII	Mxi1
Nsd1	6.82347712966863e-44	0.407785840259215	0.873	0.88	1.46793463490561e-39	SynTII	Nsd1
Adap2	7.38550854072746e-44	0.642406872994228	0.389	0.193	1.5888444523667e-39	SynTII	Adap2
Abhd18	2.78025976585326e-43	0.64814316280005	0.397	0.203	5.98117283428012e-39	SynTII	Abhd18
Lamb1	1.01217144460529e-42	0.517424030433406	0.275	0.104	2.17748442877937e-38	SynTII	Lamb1
Cnn3	1.03113891247305e-42	0.570115133623472	0.618	0.424	2.21828914240328e-38	SynTII	Cnn3
Neat1	1.50126188869798e-42	0.39686451631558	0.928	0.915	3.22966470115595e-38	SynTII	Neat1
Immp2l	3.75761355136748e-42	0.753586561342306	0.59	0.434	8.08375403305687e-38	SynTII	Immp2l
Slc40a1	4.19391386523415e-42	0.571428355180256	0.4	0.204	9.02236689827823e-38	SynTII	Slc40a1
Nisch	6.64918312517611e-42	0.440524834359001	0.856	0.77	1.43043876571914e-37	SynTII	Nisch
Zc3hav1	1.45024793263734e-41	0.594707620232805	0.527	0.344	3.11991837748271e-37	SynTII	Zc3hav1
Zbtb20	1.79090050154441e-41	0.661472624436016	0.562	0.392	3.85276424897248e-37	SynTII	Zbtb20
Ktn1	5.03529875471245e-41	0.503396013774949	0.7	0.593	1.08324382110129e-36	SynTII	Ktn1
Dhcr24	3.51308329523576e-40	0.530449548728358	0.291	0.12	7.55769609304069e-36	SynTII	Dhcr24
Arf4	1.72391375867046e-39	0.739413793336102	0.595	0.449	3.70865566902776e-35	SynTII	Arf4
Ptpn4	1.71080133043338e-38	0.639024524927256	0.499	0.326	3.68044690216133e-34	SynTII	Ptpn4
Dag1	3.51088970925891e-38	0.584742864721295	0.554	0.389	7.55297703152869e-34	SynTII	Dag1
Cmss1	3.5383623144907e-38	0.442700872447869	0.871	0.843	7.61207884716385e-34	SynTII	Cmss1
Tcf7l1	6.78790899305258e-38	0.609107347393141	0.431	0.236	1.4602828616754e-33	SynTII	Tcf7l1
Med14	7.93877771191908e-38	0.576517114415022	0.322	0.152	1.70786924916515e-33	SynTII	Med14
Ap1b1	9.67014587531232e-38	0.568333011174926	0.522	0.349	2.08033848215594e-33	SynTII	Ap1b1
Hdac6	1.71816404246531e-37	0.587761473189671	0.364	0.183	3.69628630455562e-33	SynTII	Hdac6
Cbfa2t2	1.78439021840562e-37	0.63685766823149	0.561	0.421	3.83875867685601e-33	SynTII	Cbfa2t2
Hmg20b	2.33810171413771e-37	0.530186684895234	0.364	0.183	5.02995821762446e-33	SynTII	Hmg20b
Hdac4	3.40396412742287e-37	0.533116330433147	0.591	0.435	7.32294802732481e-33	SynTII	Hdac4
Tceal9	3.48930566051851e-37	0.589294266991157	0.287	0.126	7.50654326747347e-33	SynTII	Tceal9
Lamb2	3.84915594561072e-37	0.66129498281009	0.489	0.309	8.28068918579234e-33	SynTII	Lamb2
Gadd45g	1.66606315941584e-36	0.616731721986981	0.472	0.302	3.58420167485129e-32	SynTII	Gadd45g
Ski	4.53995666205999e-36	0.61656094325988	0.487	0.311	9.76680876708965e-32	SynTII	Ski
Abca1	6.15146556839439e-36	0.642694579307776	0.36	0.19	1.32336478772868e-31	SynTII	Abca1
Cdk17	1.36583568625575e-35	0.476401440313384	0.538	0.348	2.938322311842e-31	SynTII	Cdk17
Mpp1	2.67111892727046e-35	0.525552697914651	0.269	0.113	5.74637814823693e-31	SynTII	Mpp1
Arhgef5	3.86142865197974e-35	0.604464041646259	0.437	0.271	8.30709145900401e-31	SynTII	Arhgef5
Cdk5	5.9315916338945e-35	0.575039339353284	0.411	0.235	1.27606330819972e-30	SynTII	Cdk5
Gfod1	1.08672507966875e-34	0.543797652211351	0.31	0.148	2.33787166389138e-30	SynTII	Gfod1
Mtmr12	2.64471706658967e-34	0.562044884351057	0.455	0.291	5.68957982535437e-30	SynTII	Mtmr12
Dapk1	7.09559026029081e-34	0.510159727365368	0.726	0.599	1.52647433269636e-29	SynTII	Dapk1
Rrp1b	8.58355359193289e-34	0.57687854519939	0.415	0.244	1.84657988423252e-29	SynTII	Rrp1b
Smad1	1.53591350478855e-33	0.477222350631315	0.322	0.156	3.30421072285161e-29	SynTII	Smad1
Eps8l2	8.700415835521e-33	0.335566875010468	0.903	0.906	1.87172045869563e-28	SynTII	Eps8l2
Pex19	1.06916033884552e-32	0.496600052408219	0.254	0.11	2.30008463695838e-28	SynTII	Pex19
Dock1	4.60816042633256e-32	0.44450988180962	0.735	0.635	9.91353552516924e-28	SynTII	Dock1
Nav2	5.57458626862409e-32	0.492608639855683	0.377	0.205	1.1992607439691e-27	SynTII	Nav2
Sbno2	4.03287916235049e-31	0.571314043023485	0.489	0.337	8.67593294196462e-27	SynTII	Sbno2
Zfp704	6.82656076474972e-31	0.597534303461006	0.394	0.233	1.46859801732061e-26	SynTII	Zfp704
Fam117b	1.03981727607721e-30	0.473090811656402	0.257	0.113	2.2369589060249e-26	SynTII	Fam117b
L3mbtl3	1.57437577709931e-30	0.606764033514483	0.418	0.26	3.38695460927375e-26	SynTII	L3mbtl3
Mtss1	1.71811183677624e-30	0.427771434174611	0.873	0.836	3.69617399445672e-26	SynTII	Mtss1
Epn2	2.22906429374095e-30	0.43103660642638	0.669	0.516	4.7953860151249e-26	SynTII	Epn2
Myl4	2.41094372667781e-30	0.546717505949697	0.309	0.156	5.18666323920198e-26	SynTII	Myl4
Fam83f	2.43894615566133e-30	0.487690469562659	0.262	0.118	5.24690486467422e-26	SynTII	Fam83f
Elovl5	9.54399939246034e-30	0.52996477954158	0.319	0.165	2.05320058929999e-25	SynTII	Elovl5
Adk	1.05457226579512e-29	0.513011410750733	0.601	0.471	2.26870131540504e-25	SynTII	Adk
Itga6	1.07580360851508e-29	0.503610001738201	0.3	0.149	2.31437630299849e-25	SynTII	Itga6
Vkorc1l1	1.78723743525269e-29	0.581748021859768	0.477	0.334	3.84488389445912e-25	SynTII	Vkorc1l1
Utrn	2.09294418150313e-29	0.298237022350732	0.918	0.854	4.50255081766769e-25	SynTII	Utrn
Nfib	4.50748580756375e-29	0.567198312190308	0.279	0.137	9.69695421781189e-25	SynTII	Nfib
Car2	1.31996848084069e-28	0.523508699243968	0.423	0.265	2.83964819283258e-24	SynTII	Car2
Zcchc11	2.24954284838649e-28	0.415244308068271	0.701	0.57	4.83944152973385e-24	SynTII	Zcchc11
Ide	4.08544440333983e-28	0.46045882620981	0.262	0.124	8.78901654490497e-24	SynTII	Ide
Atp2b1	6.18853280567e-28	0.376672096311433	0.617	0.44	1.33133906248379e-23	SynTII	Atp2b1
Rreb1	6.45320035982366e-28	0.393513072925961	0.77	0.744	1.38827699340886e-23	SynTII	Rreb1
Phf8	6.94612917034284e-28	0.450285445506825	0.556	0.397	1.49432076841586e-23	SynTII	Phf8
Eea1	7.72147757530788e-28	0.509836759135834	0.462	0.316	1.66112147077598e-23	SynTII	Eea1
2610507B11Rik	1.13044934460986e-27	0.521311996920758	0.433	0.291	2.43193567505919e-23	SynTII	2610507B11Rik
Sh3tc2	2.66825829094988e-27	0.45469691047897	0.572	0.412	5.74022406132047e-23	SynTII	Sh3tc2
Fam83g	3.05053611635584e-27	0.426045141902941	0.265	0.126	6.56261834711632e-23	SynTII	Fam83g
Pld1	3.51419066304029e-27	0.506181010801126	0.399	0.247	7.56007837339857e-23	SynTII	Pld1
Basp1	5.271394890401e-27	0.314067606591932	0.847	0.819	1.13403518277197e-22	SynTII	Basp1
Maged1	5.36237913263678e-27	0.418348745614337	0.753	0.654	1.15360862280415e-22	SynTII	Maged1
Cbl	6.63010722558636e-27	0.498389579161051	0.461	0.319	1.42633496744039e-22	SynTII	Cbl
Bcl2l1	1.12014675085685e-26	0.46461241060276	0.605	0.485	2.40977170511835e-22	SynTII	Bcl2l1
Cdcp1	3.17921416243714e-26	0.511099193900404	0.454	0.303	6.83944342765102e-22	SynTII	Cdcp1
Unc13b	3.98949130126317e-26	0.514908935047399	0.343	0.2	8.58259263640746e-22	SynTII	Unc13b
Baz2b	5.80064830274579e-26	0.525106358588544	0.51	0.38	1.2478934693697e-21	SynTII	Baz2b
Pcca	7.56112909525205e-26	0.514194288135004	0.42	0.273	1.62662570226157e-21	SynTII	Pcca
Dlc1	1.17210920272419e-25	0.361711452211708	0.687	0.577	2.52155852782055e-21	SynTII	Dlc1
Large1	1.17216152035631e-25	0.594575811107862	0.504	0.371	2.52167107874254e-21	SynTII	Large1
Rasal2	1.2023152216269e-25	0.527652730069732	0.347	0.201	2.58654073628595e-21	SynTII	Rasal2
Tex2	1.25050412723495e-25	0.437602144548682	0.619	0.529	2.69020952892056e-21	SynTII	Tex2
Acss2	1.28972608032886e-25	0.517000292705554	0.252	0.123	2.77458771661147e-21	SynTII	Acss2
Vps13a	1.32183122873927e-25	0.450781811668964	0.488	0.348	2.84365552238678e-21	SynTII	Vps13a
Tinagl1	4.18380322902991e-25	0.541202231751532	0.467	0.332	9.00061588661204e-21	SynTII	Tinagl1
Ldhb	5.25671095872584e-25	0.470945387009597	0.366	0.226	1.13087622855069e-20	SynTII	Ldhb
Pdzrn3	1.26612263050674e-24	0.655727755485956	0.297	0.163	2.72380961500915e-20	SynTII	Pdzrn3
Kif2a	2.19344775401726e-24	0.473498671026014	0.395	0.258	4.71876415321733e-20	SynTII	Kif2a
AC149090.1	3.19763635539042e-24	0.482149283156105	0.468	0.333	6.87907509135141e-20	SynTII	AC149090.1
Cttnbp2nl	7.02704350469575e-24	0.466002244545957	0.318	0.181	1.5117278691652e-19	SynTII	Cttnbp2nl
Camk1d	1.01463763760735e-23	0.457685156403216	0.651	0.574	2.18278994978469e-19	SynTII	Camk1d
Arhgap31	1.6898095491379e-23	0.29292882166925	0.867	0.86	3.63528728306036e-19	SynTII	Arhgap31
Eif4b	5.37551457918936e-23	0.472707803206915	0.438	0.313	1.15643445142101e-18	SynTII	Eif4b
Gphn	5.63184734244259e-23	0.382831897261618	0.706	0.63	1.21157931877967e-18	SynTII	Gphn
Pkp4	7.61535733194158e-23	0.447984571790493	0.489	0.345	1.63829182282059e-18	SynTII	Pkp4
Agap3	1.17983354212927e-22	0.43910921387731	0.446	0.308	2.5381758991827e-18	SynTII	Agap3
Ggta1	1.75585686004182e-22	0.482680831356647	0.388	0.254	3.77737486300796e-18	SynTII	Ggta1
Desi2	2.12065324020795e-22	0.470534581721194	0.513	0.396	4.56216131565935e-18	SynTII	Desi2
Slc39a11	3.90864552474016e-22	0.541895957341162	0.3	0.174	8.40866911737351e-18	SynTII	Slc39a11
Cdc73	4.15180994416211e-22	0.409052965009419	0.69	0.636	8.93178873287594e-18	SynTII	Cdc73
Wwc1	6.88014170888199e-22	0.38424807598948	0.798	0.763	1.48012488583178e-17	SynTII	Wwc1
Depdc5	3.62955844959082e-21	0.483173993087206	0.38	0.254	7.80826909260473e-17	SynTII	Depdc5
Tmem94	5.05036272676941e-21	0.48742322625408	0.372	0.249	1.0864845334099e-16	SynTII	Tmem94
Scamp5	1.62356661875263e-20	0.415407108894333	0.341	0.21	3.49277886692254e-16	SynTII	Scamp5
Pfkp	1.64619109563773e-20	0.485839822080858	0.337	0.218	3.54145090404546e-16	SynTII	Pfkp
Aspscr1	2.43777720372033e-20	0.443834846273389	0.279	0.159	5.24439009836355e-16	SynTII	Aspscr1
Ppl	2.7059562743457e-20	0.412327422159147	0.309	0.181	5.82132373299991e-16	SynTII	Ppl
Manba	2.99055327133882e-20	0.414021423725184	0.315	0.19	6.4335772526312e-16	SynTII	Manba
P4hb	3.09081200372741e-20	0.433113909779411	0.302	0.18	6.64926386361877e-16	SynTII	P4hb
AY036118	3.77499936735125e-20	0.459352960850555	0.49	0.368	8.12115613898275e-16	SynTII	AY036118
Trim33	8.32780267214002e-20	0.42334741602071	0.473	0.369	1.79156018885748e-15	SynTII	Trim33
Cacul1	1.60343731975051e-19	0.437173519160064	0.395	0.277	3.44947470597928e-15	SynTII	Cacul1
Cnnm3	2.97250687983969e-19	0.398949796308606	0.254	0.139	6.39475405059913e-15	SynTII	Cnnm3
Rell1	3.41805309257038e-19	0.460178362876355	0.412	0.299	7.35325761804667e-15	SynTII	Rell1
Plpp3	7.49471239054913e-19	0.38358185935721	0.618	0.535	1.61233747657883e-14	SynTII	Plpp3
Pomgnt1	1.0810141804642e-18	0.401576738086156	0.326	0.205	2.32558580643264e-14	SynTII	Pomgnt1
Cnppd1	1.45281920445426e-18	0.406150927613814	0.262	0.147	3.12544995454246e-14	SynTII	Cnppd1
Lpgat1	1.52749518085492e-18	0.439000622907662	0.347	0.226	3.28610038257319e-14	SynTII	Lpgat1
Spag5	1.55695116398069e-18	0.484044295927043	0.425	0.306	3.34946903907167e-14	SynTII	Spag5
Nr6a1	1.64140365942274e-18	0.382188168007749	0.731	0.713	3.53115169251614e-14	SynTII	Nr6a1
Trio	1.70372619946997e-18	0.320493455392129	0.634	0.543	3.66522617291974e-14	SynTII	Trio
Colgalt1	1.79819097745699e-18	0.407106853818501	0.279	0.162	3.86844824980322e-14	SynTII	Colgalt1
Klhl18	4.00554807494984e-18	0.42067328220957	0.331	0.213	8.61713557363959e-14	SynTII	Klhl18
Chd8	5.27002749011418e-18	0.436569009664738	0.567	0.515	1.13374101394826e-13	SynTII	Chd8
Wwc2	6.72158140322844e-18	0.308856156837817	0.871	0.843	1.44601380727654e-13	SynTII	Wwc2
Slc25a25	7.04841736055197e-18	0.42834919031736	0.275	0.163	1.51632602677555e-13	SynTII	Slc25a25
Mbnl3	7.69700147672837e-18	0.512881800123931	0.819	0.826	1.65585592768857e-13	SynTII	Mbnl3
Llgl2	7.71543417115055e-18	0.396367184675676	0.504	0.39	1.65982135323962e-13	SynTII	Llgl2
Gpi1	8.22040752014834e-18	0.368997922434039	0.271	0.158	1.76845626980951e-13	SynTII	Gpi1
Eif4g3	9.42010448451171e-18	0.401805953906597	0.466	0.36	2.026547077753e-13	SynTII	Eif4g3
Sfmbt1	1.09956588344723e-17	0.426640165781929	0.292	0.178	2.36549608506004e-13	SynTII	Sfmbt1
Ubxn7	1.30788131142424e-17	0.452931893873934	0.406	0.297	2.81364506526696e-13	SynTII	Ubxn7
Fat1	1.9638614587289e-17	0.409601328891097	0.328	0.213	4.22485515616348e-13	SynTII	Fat1
Slc7a5	3.51111039505214e-17	0.402009852733349	0.365	0.243	7.55345179287567e-13	SynTII	Slc7a5
Arhgap29	5.99211216847316e-17	0.390538734247215	0.33	0.216	1.28908309080363e-12	SynTII	Arhgap29
Gpat4	7.23438008101243e-17	0.408011669510042	0.258	0.152	1.55633218682821e-12	SynTII	Gpat4
Acbd6	8.29301978479477e-17	0.402388658248777	0.275	0.167	1.7840773463029e-12	SynTII	Acbd6
Mras	1.06138283993876e-16	0.440947655347354	0.254	0.15	2.28335290356026e-12	SynTII	Mras
Ik	1.07117206602868e-16	0.416900548241298	0.313	0.205	2.30441246564751e-12	SynTII	Ik
Ano6	1.46834513940324e-16	0.398800084826699	0.62	0.556	3.15885089839818e-12	SynTII	Ano6
Rbp1	1.62408679781101e-16	0.418264496989709	0.343	0.23	3.49389792813082e-12	SynTII	Rbp1
Bsg	3.36108045850163e-16	0.432390487613988	0.485	0.398	7.23069239037456e-12	SynTII	Bsg
Ncor1	3.40093964953636e-16	0.295608310891828	0.725	0.695	7.31644146804758e-12	SynTII	Ncor1
Ripor3	4.31913130411911e-16	0.418245185881457	0.35	0.238	9.29174717455144e-12	SynTII	Ripor3
Ezr	1.09426823652049e-15	0.361202562006165	0.544	0.468	2.35409925722653e-11	SynTII	Ezr
Mafg	2.12706258161099e-15	0.373460351131517	0.482	0.386	4.57594973181973e-11	SynTII	Mafg
Uhrf1bp1l	2.53090008994184e-15	0.382011378520112	0.318	0.212	5.44472536349189e-11	SynTII	Uhrf1bp1l
Nop56	2.68140703929334e-15	0.380396611036389	0.321	0.214	5.76851096363177e-11	SynTII	Nop56
Ptpra	3.3441379966375e-15	0.400390684554699	0.493	0.405	7.19424407216625e-11	SynTII	Ptpra
Pacsin2	3.74941391775696e-15	0.364312249139684	0.657	0.609	8.06611416127055e-11	SynTII	Pacsin2
Ctnnb1	4.15876786996405e-15	0.367843709413323	0.538	0.477	8.94675731865367e-11	SynTII	Ctnnb1
Hspbap1	4.21400131811963e-15	0.40914862012766	0.386	0.285	9.06558103567075e-11	SynTII	Hspbap1
Acaca	7.80707444550806e-15	0.507977215860041	0.318	0.219	1.67953592546215e-10	SynTII	Acaca
Fam83b	7.88784689153247e-15	0.338776685340357	0.292	0.186	1.69691250177538e-10	SynTII	Fam83b
Tmem259	1.02141263509277e-14	0.373616964539006	0.504	0.43	2.19736500187507e-10	SynTII	Tmem259
Nfe2l2	1.136662019122e-14	0.38318234637242	0.353	0.246	2.44530100173716e-10	SynTII	Nfe2l2
Eed	1.34886723998286e-14	0.432066356422607	0.303	0.202	2.90181809337512e-10	SynTII	Eed
Kdm1b	2.21406845531016e-14	0.414716918912342	0.3	0.204	4.76312546790876e-10	SynTII	Kdm1b
Cebpg	2.58546314686744e-14	0.380219688599649	0.273	0.172	5.56210686785592e-10	SynTII	Cebpg
Vav2	3.02740462266867e-14	0.317957800549849	0.41	0.29	6.5128555647471e-10	SynTII	Vav2
Pappa2	3.17694486926445e-14	0.371949900460604	0.818	0.841	6.83456149724862e-10	SynTII	Pappa2
Abcd3	3.200314433766e-14	0.373691207512307	0.365	0.263	6.8848364413608e-10	SynTII	Abcd3
Cdr2	3.67122958758218e-14	0.352811356620806	0.286	0.182	7.89791621176555e-10	SynTII	Cdr2
Hsp90ab1	3.99989693432321e-14	0.370740768216047	0.417	0.32	8.60497827480953e-10	SynTII	Hsp90ab1
Flt1	4.50047731472427e-14	0.399644790459022	0.71	0.682	9.68187684716632e-10	SynTII	Flt1
Efna5	4.68516998297616e-14	0.441024409566099	0.422	0.31	1.00792061843766e-09	SynTII	Efna5
Esyt2	1.32954903082118e-13	0.33169529448166	0.628	0.58	2.86025883000561e-09	SynTII	Esyt2
Abhd17b	1.93837271376714e-13	0.396021969535638	0.265	0.169	4.17002121912726e-09	SynTII	Abhd17b
Vasp	3.38025155519582e-13	0.383061609394705	0.411	0.324	7.27193517069278e-09	SynTII	Vasp
Xrn2	3.39157722470572e-13	0.340760885717111	0.383	0.286	7.29630008350941e-09	SynTII	Xrn2
D5Ertd579e	6.32608783449833e-13	0.292177615684079	0.737	0.747	1.36093127583563e-08	SynTII	D5Ertd579e
Reps1	6.98415901935027e-13	0.370132326456345	0.506	0.447	1.50250212983282e-08	SynTII	Reps1
Ralgds	8.379450756262e-13	0.346543194186269	0.466	0.382	1.80267124119464e-08	SynTII	Ralgds
Arhgap23	9.03228659073212e-13	0.271621309670847	0.693	0.684	1.9431158142642e-08	SynTII	Arhgap23
Iars	1.00030810571423e-12	0.378520851153231	0.259	0.17	2.15196282782303e-08	SynTII	Iars
E130308A19Rik	1.10021359040721e-12	0.327252645792559	0.309	0.214	2.36688949704302e-08	SynTII	E130308A19Rik
Mthfr	1.26718655744614e-12	0.360957218381174	0.259	0.171	2.72609844103389e-08	SynTII	Mthfr
Zfp644	1.4230830474566e-12	0.365708278633953	0.534	0.484	3.06147855999338e-08	SynTII	Zfp644
Hat1	2.23906322622586e-12	0.326456337130889	0.292	0.197	4.8168967185797e-08	SynTII	Hat1
Myo1c	3.66766371519421e-12	0.4043737654681	0.434	0.358	7.89024495049729e-08	SynTII	Myo1c
Usp25	5.228864536224e-12	0.344395614443018	0.434	0.359	1.12488562767787e-07	SynTII	Usp25
Gys1	5.65448552214944e-12	0.356383411917882	0.437	0.352	1.21644947038001e-07	SynTII	Gys1
Nelfb	6.15136044246458e-12	0.358232605565031	0.28	0.19	1.3233421719874e-07	SynTII	Nelfb
Hip1r	8.62742127027344e-12	0.390959955588834	0.271	0.183	1.85601713787393e-07	SynTII	Hip1r
Mapt	1.30594265329549e-11	0.384387963713014	0.255	0.168	2.80947443003458e-07	SynTII	Mapt
Rapgef6	1.62648229676715e-11	0.378085685829982	0.482	0.434	3.49905136503516e-07	SynTII	Rapgef6
Fam193b	2.33211312045637e-11	0.35582642905208	0.482	0.423	5.0170749560378e-07	SynTII	Fam193b
Tead3	2.41253991241612e-11	0.302146014350059	0.515	0.45	5.19009711358079e-07	SynTII	Tead3
Hspa8	4.0407642810007e-11	0.39712894159769	0.322	0.241	8.69289619771681e-07	SynTII	Hspa8
Epb41l5	4.15013605444838e-11	0.315454817566154	0.326	0.235	8.92818769393481e-07	SynTII	Epb41l5
Klf6	4.1791447596726e-11	0.364807631615631	0.438	0.372	8.99059412148367e-07	SynTII	Klf6
Arid1a	4.22983124521635e-11	0.266068757350369	0.515	0.424	9.09963595783393e-07	SynTII	Arid1a
Sugp2	4.34666776337374e-11	0.342374794520564	0.269	0.187	9.35098635934592e-07	SynTII	Sugp2
Gjb2	5.53821564795442e-11	0.352790492974745	0.408	0.316	1.19143633234443e-06	SynTII	Gjb2
Ankrd28	6.40287173305839e-11	0.328585434473189	0.476	0.402	1.37744979593285e-06	SynTII	Ankrd28
Eif3c	8.81165178040404e-11	0.329595682028972	0.258	0.175	1.89565064751832e-06	SynTII	Eif3c
Afg3l2	1.15485445319714e-10	0.308788875002329	0.271	0.186	2.48443838516301e-06	SynTII	Afg3l2
Gak	1.38394510537193e-10	0.344248037667573	0.476	0.416	2.97728110518663e-06	SynTII	Gak
Bckdhb	1.73465791231185e-10	0.379637033023777	0.397	0.334	3.73176956675649e-06	SynTII	Bckdhb
Phactr4	1.99040321223143e-10	0.302471532244209	0.49	0.434	4.28195443047348e-06	SynTII	Phactr4
Pitpna	2.29485556229303e-10	0.328621978514361	0.444	0.367	4.936922771161e-06	SynTII	Pitpna
Mbnl1	2.40925353788613e-10	0.344715946856989	0.302	0.221	5.18302713605442e-06	SynTII	Mbnl1
Safb2	4.06587121909036e-10	0.315898941849015	0.445	0.377	8.74690875362909e-06	SynTII	Safb2
Lgals1	5.01081614198218e-10	0.32715577535611	0.254	0.173	1.07797687662463e-05	SynTII	Lgals1
Rap1gds1	8.89753232109841e-10	0.265146364744152	0.433	0.345	1.9141261282379e-05	SynTII	Rap1gds1
Bcl2l13	9.66859874393452e-10	0.313250080414033	0.257	0.179	2.08000564778263e-05	SynTII	Bcl2l13
Pip5k1a	1.80167391398798e-09	0.261962511841968	0.611	0.586	3.87594109116235e-05	SynTII	Pip5k1a
Pabpc1	1.86958200901692e-09	0.30383678073933	0.31	0.231	4.0220317759981e-05	SynTII	Pabpc1
Pcyt1a	2.00494704539815e-09	0.315812346269734	0.305	0.227	4.31324257876504e-05	SynTII	Pcyt1a
Rabgef1	2.62895330655454e-09	0.324047454434208	0.438	0.376	5.65566724839079e-05	SynTII	Rabgef1
Cast	4.30037688789163e-09	0.328158457308319	0.5	0.446	9.25140079892126e-05	SynTII	Cast
Atp1b3	5.6226682392952e-09	0.320460981029675	0.285	0.213	0.000120960461831958	SynTII	Atp1b3
Pura	7.15247575104025e-09	0.362566867566014	0.376	0.311	0.000153871210832129	SynTII	Pura
Akt1	8.14006068202491e-09	0.326706115778454	0.305	0.232	0.000175117125452402	SynTII	Akt1
Limd1	8.77685300480526e-09	0.281180406449075	0.545	0.513	0.000188816438692375	SynTII	Limd1
Atad3a	8.90600361597029e-09	0.347788606269839	0.307	0.237	0.000191594855790369	SynTII	Atad3a
Cul4b	1.07865177165797e-08	0.277709692533981	0.602	0.582	0.00023205035563678	SynTII	Cul4b
D17Wsu92e	1.74607629870332e-08	0.307206785117863	0.483	0.433	0.000375633394140046	SynTII	D17Wsu92e
Hltf	1.82732436477651e-08	0.32932682189367	0.285	0.215	0.000393112290594372	SynTII	Hltf
Grhl2	1.93380514104503e-08	0.261081679637073	0.266	0.189	0.000416019499993018	SynTII	Grhl2
Ckb	2.02261663536986e-08	0.357260063357957	0.356	0.297	0.000435125516767118	SynTII	Ckb
Tmem165	2.14817050349083e-08	0.357088066295137	0.294	0.226	0.000462135920415982	SynTII	Tmem165
Spats2	2.93261638319894e-08	0.279484478058954	0.414	0.34	0.000630893762517588	SynTII	Spats2
Me1	4.00084731522988e-08	0.297711867848179	0.339	0.265	0.000860702282925404	SynTII	Me1
Ifrd1	4.02587444582861e-08	0.288891018565919	0.311	0.243	0.000866086369531109	SynTII	Ifrd1
Tmem135	4.12800160037866e-08	0.340983895402247	0.341	0.277	0.000888056984289461	SynTII	Tmem135
Gsn	4.61426287950709e-08	0.38714072038849	0.355	0.295	0.00099266637326836	SynTII	Gsn
Plekhm3	8.41226703092325e-08	0.321515289515452	0.281	0.215	0.00180973100636252	SynTII	Plekhm3
Lpar1	8.89646177215315e-08	0.274391940852992	0.377	0.306	0.00191389582104331	SynTII	Lpar1
Wdr62	1.07208001199125e-07	0.273681571114134	0.308	0.238	0.00230636572979678	SynTII	Wdr62
Cenpp	1.10286552654224e-07	0.330747443929644	0.283	0.214	0.00237259460725031	SynTII	Cenpp
Clasp2	1.50794727730083e-07	0.274472428962073	0.45	0.399	0.00324404697765728	SynTII	Clasp2
Ncapd3	1.64484432605007e-07	0.262173854337411	0.281	0.215	0.00353855359863152	SynTII	Ncapd3
Hmgn1	1.78433266521547e-07	0.252660778651586	0.288	0.217	0.00383863486267804	SynTII	Hmgn1
Sdf2	2.4172683185995e-07	0.290697782152578	0.262	0.2	0.00520026933380311	SynTII	Sdf2
Phyhipl	2.7336997120705e-07	0.250920203169176	0.276	0.203	0.00588100819057727	SynTII	Phyhipl
Specc1l	2.91199418782276e-07	0.280609648322202	0.322	0.26	0.0062645730962631	SynTII	Specc1l
Mdm2	3.04918673347694e-07	0.29973645519658	0.304	0.245	0.00655971541972893	SynTII	Mdm2
Abhd12	3.24226824023117e-07	0.307647954559411	0.326	0.267	0.00697509166520931	SynTII	Abhd12
Cttn	3.6313025565381e-07	0.31325218156021	0.37	0.309	0.00781202118988042	SynTII	Cttn
Gbe1	3.78491473996237e-07	0.280318571789229	0.273	0.208	0.00814248708008104	SynTII	Gbe1
Odf2	4.524650134395e-07	0.281181808287137	0.328	0.267	0.00973387983412397	SynTII	Odf2
Lars	4.61262863488106e-07	0.324973944841524	0.377	0.329	0.00992314798221963	SynTII	Lars
Ptprk	5.7098112836142e-07	0.443207894650596	0.564	0.591	0.0122835170144392	SynTII	Ptprk
Eps15l1	5.98170209748878e-07	0.267012730782476	0.468	0.427	0.0128684357223276	SynTII	Eps15l1
Pcnx	6.03070328056676e-07	0.294330446865949	0.287	0.224	0.0129738519674833	SynTII	Pcnx
Sh3d19	6.27221260090422e-07	0.27824567179714	0.467	0.424	0.0134934109683253	SynTII	Sh3d19
Tecr	7.20299915002238e-07	0.288223547870696	0.294	0.239	0.0154958120714431	SynTII	Tecr
Bmp2k	7.66052124264566e-07	0.284623795237394	0.286	0.227	0.0164800793493036	SynTII	Bmp2k
Actb	9.17693681859578e-07	0.274987939205192	0.442	0.4	0.0197423441778451	SynTII	Actb
Sntb1	1.52989362962558e-06	0.260866434199719	0.28	0.215	0.0329126016541351	SynTII	Sntb1
Ahdc1	1.76179689187921e-06	0.291676220734195	0.461	0.415	0.0379015365349975	SynTII	Ahdc1
Cyb5b	1.97543777426057e-06	0.296434358468515	0.4	0.351	0.0424975928376675	SynTII	Cyb5b
Xist	2.23231124410316e-06	0.778346333520804	0.293	0.237	0.0480237117943913	SynTII	Xist
Gm19951	2.47088668506204e-06	0.267615019419279	0.269	0.213	0.0531561852557397	SynTII	Gm19951
Fbrsl1	2.85283490201885e-06	0.25197846172818	0.515	0.493	0.0613730372471316	SynTII	Fbrsl1
Mmp15	3.06118173313903e-06	0.29786512863617	0.291	0.237	0.06585520262502	SynTII	Mmp15
Stk25	3.76519658392609e-06	0.261874424688926	0.359	0.304	0.081000674110002	SynTII	Stk25
Proser2	4.89292131517813e-06	0.283626110537399	0.326	0.276	0.105261416253427	SynTII	Proser2
Zcchc6	5.14277856368131e-06	0.258606103789318	0.274	0.215	0.110636595240476	SynTII	Zcchc6
Calm1	8.7156981639989e-06	0.304195159182367	0.319	0.277	0.187500814602108	SynTII	Calm1
Lars2	9.46282963552999e-06	0.275490417655938	0.479	0.456	0.203573853949157	SynTII	Lars2
H3f3b	1.40779481162417e-05	0.291873314271096	0.308	0.257	0.302858897824707	SynTII	H3f3b
R3hdm1	1.45313600880511e-05	0.267359069187832	0.444	0.416	0.312613149574243	SynTII	R3hdm1
Bcl9l	1.62176795875178e-05	0.258227794755242	0.298	0.246	0.348890940966271	SynTII	Bcl9l
Zfp229	2.44823137974002e-05	0.27021401083847	0.257	0.208	0.526688016723471	SynTII	Zfp229
Irs2	3.16515713194564e-05	0.26862352450878	0.273	0.224	0.680920253795466	SynTII	Irs2
Rcc2	3.89790692955334e-05	0.256165830919365	0.253	0.205	0.83855671775481	SynTII	Rcc2
Chuk	3.93919277824284e-05	0.270102677848066	0.273	0.225	0.847438542383381	SynTII	Chuk
Rhot1	4.43275138090874e-05	0.277530685053513	0.361	0.325	0.953617804574896	SynTII	Rhot1
Yeats2	4.5297978283749e-05	0.265607952009501	0.348	0.307	0.974495406818292	SynTII	Yeats2
Ctr9	4.65030450974591e-05	0.254603564993689	0.456	0.442	1	SynTII	Ctr9
Meg3	7.97340739050036e-05	0.474409842634596	0.611	0.631	1	SynTII	Meg3
Atp7a	8.67801631059547e-05	0.2632848025437	0.309	0.269	1	SynTII	Atp7a
Stub1	9.3619419719249e-05	0.258847638145699	0.361	0.329	1	SynTII	Stub1
Phip	0.00012132496356004	0.266337269773165	0.412	0.385	1	SynTII	Phip
Clcn6	0.000214642509054031	0.250168980994186	0.294	0.258	1	SynTII	Clcn6
Man1a2	0.000426871087431459	0.250576637252174	0.454	0.449	1	SynTII	Man1a2
Aamp	0.000622678436681614	0.268129113171717	0.321	0.29	1	SynTII	Aamp
Atg4b	0.000666457394258147	0.257152400365545	0.411	0.388	1	SynTII	Atg4b
Fer	0.00079394539472642	0.252834018714805	0.377	0.354	1	SynTII	Fer
Col4a1	0.00265814245937596	0.326401317482358	0.314	0.294	1	SynTII	Col4a1
Dab1	0	2.28612571835993	0.919	0.149	0	SynTI	Dab1
Glis1	0	2.25930812612988	0.993	0.468	0	SynTI	Glis1
Arl15	0	2.15215947873771	0.973	0.738	0	SynTI	Arl15
Snap91	0	2.03302810411329	0.96	0.303	0	SynTI	Snap91
Rbm20	0	1.99434745446241	0.781	0.119	0	SynTI	Rbm20
Dennd2a	0	1.84632620952739	0.918	0.327	0	SynTI	Dennd2a
Atrnl1	0	1.83878563334048	0.953	0.484	0	SynTI	Atrnl1
Slc38a1	0	1.70373361998598	0.983	0.552	0	SynTI	Slc38a1
Akap13	0	1.66717583943374	0.979	0.622	0	SynTI	Akap13
Mpp7	0	1.65482689110834	0.954	0.512	0	SynTI	Mpp7
Mapre2	0	1.62426574206687	0.863	0.276	0	SynTI	Mapre2
Tgfa	0	1.59824167580875	0.725	0.062	0	SynTI	Tgfa
Iqgap2	0	1.58602933102905	0.937	0.462	0	SynTI	Iqgap2
Lrch1	0	1.56879651213941	0.966	0.521	0	SynTI	Lrch1
Pex5l	0	1.54467696782548	0.723	0.122	0	SynTI	Pex5l
Psmd9	0	1.54349152937232	0.78	0.214	0	SynTI	Psmd9
Lrp8	0	1.51958461110351	0.726	0.09	0	SynTI	Lrp8
Dlg5	0	1.5103082333691	0.878	0.305	0	SynTI	Dlg5
Tns1	0	1.49985703793854	0.946	0.452	0	SynTI	Tns1
Tec	0	1.48936142935606	0.749	0.136	0	SynTI	Tec
Osbp2	0	1.48029240447656	0.629	0.053	0	SynTI	Osbp2
Sik3	0	1.44512111942452	0.945	0.506	0	SynTI	Sik3
Sdk1	0	1.42011948427307	0.888	0.54	0	SynTI	Sdk1
Myof	0	1.41778608495292	0.885	0.335	0	SynTI	Myof
Slco4a1	0	1.40322202353039	0.737	0.133	0	SynTI	Slco4a1
Zbtb7c	0	1.39347333247759	0.928	0.439	0	SynTI	Zbtb7c
Cds1	0	1.38340108289647	0.769	0.19	0	SynTI	Cds1
Ralgps1	0	1.3715327692318	0.893	0.399	0	SynTI	Ralgps1
Kitl	0	1.36539061388075	0.816	0.298	0	SynTI	Kitl
Shb	0	1.36335517170709	0.849	0.29	0	SynTI	Shb
Tfrc	0	1.35253987563445	0.879	0.34	0	SynTI	Tfrc
Slc12a7	0	1.30326905098763	0.715	0.157	0	SynTI	Slc12a7
Arhgef3	0	1.29159176706328	0.847	0.368	0	SynTI	Arhgef3
Kdm2b	0	1.29139613635042	0.75	0.214	0	SynTI	Kdm2b
Caskin1	0	1.27566807155735	0.972	0.725	0	SynTI	Caskin1
Ehbp1	0	1.24708810356089	0.964	0.73	0	SynTI	Ehbp1
Ahcyl2	0	1.21099797238004	0.959	0.702	0	SynTI	Ahcyl2
Itpk1	0	1.17890907950983	0.849	0.307	0	SynTI	Itpk1
Cux1	0	1.10055020836276	0.967	0.718	0	SynTI	Cux1
Cmtm4	0	1.04731990289652	0.916	0.544	0	SynTI	Cmtm4
Arhgap10	0	1.02368387377285	0.996	0.938	0	SynTI	Arhgap10
Ahnak	0	1.00324083791005	0.95	0.717	0	SynTI	Ahnak
Atp11a	0	0.970619011566944	0.948	0.699	0	SynTI	Atp11a
Kank1	0	0.939984232806967	0.976	0.824	0	SynTI	Kank1
Tacc2	0	0.922151953904198	0.989	0.858	0	SynTI	Tacc2
Macf1	0	0.775568890508707	0.993	0.958	0	SynTI	Macf1
Mycbp2	5.36221334158735e-308	0.90120015471432	0.98	0.842	1.15357295617569e-303	SynTI	Mycbp2
Mylk	1.33453132859569e-307	1.41203904584242	0.727	0.176	2.87097724720791e-303	SynTI	Mylk
Sesn1	4.92249063345262e-299	1.00614791369664	0.912	0.626	1.05897540997466e-294	SynTI	Sesn1
Plcg2	5.16126481180697e-299	1.44891088947652	0.627	0.067	1.11034289896403e-294	SynTI	Plcg2
B230312C02Rik	1.04251147787743e-298	1.3520654804894	0.645	0.086	2.24275494235772e-294	SynTI	B230312C02Rik
Stra6	1.14436881202602e-297	1.0074977223797	0.936	0.511	2.46188062531158e-293	SynTI	Stra6
Sh3pxd2a	4.16658791857282e-297	1.1354441265454	0.841	0.36	8.9635805892257e-293	SynTI	Sh3pxd2a
Thrb	1.59797168365971e-293	1.52898225841921	0.664	0.125	3.43771648305713e-289	SynTI	Thrb
Epb41l4a	2.00623888335972e-293	1.4083395572098	0.68	0.143	4.31602170977177e-289	SynTI	Epb41l4a
C2cd5	2.23398680473773e-290	1.17554564380702	0.765	0.275	4.80597581303228e-286	SynTI	C2cd5
Zfand3	6.52990798551006e-290	0.752990681357594	0.98	0.91	1.40477910492278e-285	SynTI	Zfand3
Tbc1d4	8.02519684885957e-290	1.52698399663979	0.672	0.142	1.72646059809516e-285	SynTI	Tbc1d4
Adam19	2.04335010744003e-288	1.19295588061359	0.749	0.221	4.39585908613574e-284	SynTI	Adam19
Slc41a2	1.93204945950166e-286	1.29655409658822	0.638	0.088	4.15641800222592e-282	SynTI	Slc41a2
Ptpn13	8.15391346059347e-286	1.11577465184462	0.817	0.386	1.75415140277747e-281	SynTI	Ptpn13
Amot	8.18555022278982e-286	1.2170318355933	0.758	0.276	1.76095741942877e-281	SynTI	Amot
Cuedc1	1.06055553781389e-284	1.26520845808487	0.64	0.099	2.28157312849902e-280	SynTI	Cuedc1
Lims2	2.9853779973382e-283	1.13556297785166	0.772	0.242	6.42244368567366e-279	SynTI	Lims2
Eps8	2.76707329367878e-281	1.16260481429217	0.842	0.423	5.95280477669115e-277	SynTI	Eps8
Osbpl3	3.34438706811835e-281	1.31288739666032	0.649	0.115	7.19477989964301e-277	SynTI	Osbpl3
Mtus1	5.29136561817332e-281	1.03473532543395	0.877	0.423	1.13833148543763e-276	SynTI	Mtus1
Ndrg1	2.96945948002809e-280	1.20453447134927	0.674	0.131	6.38819817938444e-276	SynTI	Ndrg1
Fmnl2	6.38294783349075e-277	1.64654708257473	0.717	0.254	1.37316356741886e-272	SynTI	Fmnl2
Batf3	1.89243558123698e-274	1.25337888826791	0.61	0.077	4.07119666591511e-270	SynTI	Batf3
Kirrel3	5.31397461089312e-274	1.51877310613666	0.611	0.089	1.14319535804144e-269	SynTI	Kirrel3
Atxn2	1.39786486469966e-270	0.819888596096955	0.933	0.701	3.00722668342839e-266	SynTI	Atxn2
Samd4	1.93969322618603e-270	1.35104144681498	0.74	0.284	4.17286203749401e-266	SynTI	Samd4
Zdhhc14	3.89338125148181e-270	1.32064350981703	0.72	0.221	8.37583108631281e-266	SynTI	Zdhhc14
Iqsec1	2.39116938865315e-268	0.790455258673985	0.968	0.88	5.14412270580951e-264	SynTI	Iqsec1
Plekha6	5.23716699880568e-268	1.0212403486061	0.96	0.586	1.12667173645307e-263	SynTI	Plekha6
Stard8	7.97316695517458e-268	1.26264118138402	0.611	0.09	1.71526740706671e-263	SynTI	Stard8
Eif4g1	5.63564195458318e-267	0.83994606732916	0.927	0.718	1.21239565368948e-262	SynTI	Eif4g1
Tpcn1	3.23257610429904e-264	1.12140087404875	0.719	0.233	6.95424097317853e-260	SynTI	Tpcn1
Hspg2	7.10904826626436e-262	1.05814943100869	0.828	0.406	1.52936955352145e-257	SynTI	Hspg2
Wnk3	9.34960618723901e-262	1.29081475732048	0.659	0.152	2.01138077906073e-257	SynTI	Wnk3
Baiap2l1	4.86394662142717e-260	1.23248094596452	0.682	0.186	1.04638083666763e-255	SynTI	Baiap2l1
Slc22a23	9.10676955241834e-258	0.953930997876117	0.882	0.401	1.95913933381176e-253	SynTI	Slc22a23
Sept4	2.53543610836391e-257	1.1403062172994	0.669	0.173	5.45448369992327e-253	SynTI	Sept4
Hlcs	2.12534698417222e-253	1.06371277409436	0.802	0.35	4.5722589670497e-249	SynTI	Hlcs
Lonrf3	9.83601088069219e-250	1.14522316996655	0.639	0.131	2.11602102076331e-245	SynTI	Lonrf3
Peg3	5.31151918883407e-248	0.681769808555842	0.971	0.903	1.14266712309387e-243	SynTI	Peg3
Sgms2	2.55909589594018e-247	1.18189053625929	0.654	0.151	5.50538300093612e-243	SynTI	Sgms2
Epb41	4.9891221995136e-247	0.970032065419444	0.874	0.609	1.07330985878136e-242	SynTI	Epb41
Ttll5	1.00897962130973e-229	0.751859062366186	0.922	0.745	2.17061785932362e-225	SynTI	Ttll5
Dmxl2	2.10960591667675e-228	0.994965580233173	0.736	0.319	4.53839520854668e-224	SynTI	Dmxl2
Tead1	3.53163000091508e-228	0.766919441072415	0.937	0.704	7.59759562096861e-224	SynTI	Tead1
Plagl1	1.02905775436451e-226	1.06534039123893	0.71	0.272	2.21381194696436e-222	SynTI	Plagl1
Rgl1	3.63878403605157e-224	1.11841325926	0.653	0.193	7.82811609675774e-220	SynTI	Rgl1
Rassf5	4.35067794582921e-224	1.10050534783187	0.506	0.042	9.35961346486239e-220	SynTI	Rassf5
Usp48	5.22943949856387e-222	0.828579934260493	0.833	0.509	1.12500931932605e-217	SynTI	Usp48
Slco2a1	9.92125031912709e-220	1.19158729409138	0.627	0.17	2.13435858115381e-215	SynTI	Slco2a1
Plekhd1	2.6892650762846e-219	1.06630656480905	0.478	0.029	5.78541595861105e-215	SynTI	Plekhd1
Gm28375	2.87221763630077e-219	1.30077168522744	0.511	0.058	6.17900180097385e-215	SynTI	Gm28375
Agfg1	4.06756332245718e-218	0.926597889206687	0.767	0.388	8.75054897560212e-214	SynTI	Agfg1
Acvr2b	1.27559652815642e-214	0.982924461856552	0.704	0.295	2.74419081102291e-210	SynTI	Acvr2b
Prkcz	1.7365976153031e-213	0.799037376409111	0.874	0.432	3.73594244980157e-209	SynTI	Prkcz
Rassf6	5.62211767212531e-212	1.03555297277757	0.535	0.08	1.20948617480432e-207	SynTI	Rassf6
Foxn3	7.84638356700187e-212	0.734891637739832	0.934	0.742	1.68799249676911e-207	SynTI	Foxn3
Clip1	1.57188469426867e-211	0.96095910091844	0.742	0.293	3.38159554278019e-207	SynTI	Clip1
Sgk2	1.10184694451116e-209	1.04263006018178	0.512	0.063	2.37040333172685e-205	SynTI	Sgk2
Pard6g	3.0888730747358e-209	1.03531515566029	0.694	0.264	6.64509264567912e-205	SynTI	Pard6g
Foxo3	6.70724155152195e-209	1.09798107796647	0.665	0.233	1.44292887497892e-204	SynTI	Foxo3
Anxa4	1.14121540380457e-207	0.78445375373153	0.857	0.489	2.45509669820477e-203	SynTI	Anxa4
Fam107b	2.61303118302418e-207	1.07174255412018	0.559	0.113	5.62141398403991e-203	SynTI	Fam107b
Fndc3b	7.24846883193453e-206	0.48961403843872	0.994	0.957	1.55936309981408e-201	SynTI	Fndc3b
Rhpn2	1.11228445853834e-203	1.03413157586467	0.478	0.046	2.39285755565352e-199	SynTI	Rhpn2
Mkl1	1.4689367478416e-203	0.8227328475118	0.845	0.559	3.16012362563163e-199	SynTI	Mkl1
Ppfia1	6.75850762202608e-202	0.797510151712549	0.836	0.543	1.45395774472647e-197	SynTI	Ppfia1
Traf3	1.63606656907005e-200	1.02928156781548	0.695	0.286	3.5196700100404e-196	SynTI	Traf3
Bicdl1	1.76029163173652e-200	0.859882352739447	0.781	0.34	3.78691538735477e-196	SynTI	Bicdl1
Suclg2	9.77278964841636e-200	1.0154649198793	0.695	0.301	2.10242023706381e-195	SynTI	Suclg2
Slc6a6	1.81661041430614e-197	0.896352152018077	0.771	0.417	3.90807398429679e-193	SynTI	Slc6a6
Optn	1.73613693625488e-195	0.988240953104567	0.641	0.229	3.73495139096512e-191	SynTI	Optn
Rb1	4.20895032653441e-195	0.88134286475605	0.751	0.341	9.05471483747348e-191	SynTI	Rb1
Jag2	5.21179644950576e-190	0.995193912787664	0.499	0.073	1.12121377018217e-185	SynTI	Jag2
Bmper	5.619513947207e-190	1.2285336035202	0.502	0.087	1.20892603546264e-185	SynTI	Bmper
Ankrd44	4.43219150972835e-189	0.971551249664401	0.673	0.258	9.5349735948786e-185	SynTI	Ankrd44
Rufy3	8.68137198701976e-189	1.00404569801121	0.646	0.25	1.86762355556756e-184	SynTI	Rufy3
Med12l	8.98083002235339e-189	0.8527463606408	0.854	0.577	1.93204596270888e-184	SynTI	Med12l
Msi2	3.77278074150975e-188	0.958390579727955	0.767	0.412	8.11638320920992e-184	SynTI	Msi2
Sema6a	2.33941277689009e-187	0.950258793011717	0.692	0.278	5.03277870692366e-183	SynTI	Sema6a
Agrn	9.19640302056528e-187	1.12236877947406	0.557	0.143	1.97842218181421e-182	SynTI	Agrn
Car4	2.11629415868214e-186	0.726317385915863	0.851	0.436	4.55278362357289e-182	SynTI	Car4
Nhs	7.27448971026512e-186	0.805118503216854	0.851	0.568	1.56496097136933e-181	SynTI	Nhs
Tulp4	1.36362956672736e-185	0.743204023978834	0.844	0.559	2.93357628690057e-181	SynTI	Tulp4
Wwtr1	3.16754633019667e-184	0.697926992881155	0.897	0.568	6.8143424201521e-180	SynTI	Wwtr1
Ap2a2	1.16969483693373e-183	0.671947497738255	0.896	0.567	2.51636450269554e-179	SynTI	Ap2a2
Esrp1	1.90992551491799e-183	0.971408664881422	0.603	0.19	4.10882276024308e-179	SynTI	Esrp1
Sgk3	2.93715912902613e-183	0.937371431825183	0.651	0.252	6.31871043427391e-179	SynTI	Sgk3
Etnk1	1.95512281817398e-180	0.977966147275346	0.61	0.222	4.20605571873769e-176	SynTI	Etnk1
Rnf128	1.49451714761712e-179	0.8460759159246	0.736	0.377	3.21515473966871e-175	SynTI	Rnf128
Gpr137b	2.3653693777897e-179	0.959638787606059	0.564	0.163	5.08861914243898e-175	SynTI	Gpr137b
Kif13a	3.00437859469507e-179	0.810546175236602	0.854	0.569	6.4633196707675e-175	SynTI	Kif13a
Ankrd12	1.02660992957436e-177	0.832756041946144	0.801	0.494	2.20854594149331e-173	SynTI	Ankrd12
Smurf1	6.74484860570798e-177	0.884781993821336	0.744	0.402	1.45101928054596e-172	SynTI	Smurf1
Rapgef2	2.15799763050857e-176	0.622893787064051	0.958	0.861	4.64250030251308e-172	SynTI	Rapgef2
Slc23a2	5.99578523392544e-176	0.940689199870046	0.633	0.236	1.28987327737438e-171	SynTI	Slc23a2
Stx3	2.34914552689064e-175	1.00710868839137	0.54	0.146	5.05371677199984e-171	SynTI	Stx3
Sh3tc1	3.33845812069116e-172	0.928196507608502	0.438	0.051	7.1820249550429e-168	SynTI	Sh3tc1
Enah	5.08631404092118e-172	0.710189888857613	0.865	0.587	1.09421873962337e-167	SynTI	Enah
D10Wsu102e	5.81345832978052e-172	0.931586543483725	0.674	0.319	1.25064929048568e-167	SynTI	D10Wsu102e
Fgd4	7.91249894866254e-171	0.746831885665958	0.816	0.539	1.70221589882577e-166	SynTI	Fgd4
Rad51b	1.03120462545105e-170	0.971665307870497	0.715	0.372	2.21843051073284e-166	SynTI	Rad51b
Folr1	1.27664544225103e-167	0.889547616324968	0.465	0.072	2.74644733991464e-163	SynTI	Folr1
Pepd	2.3495106498234e-167	0.948912064462222	0.541	0.144	5.05450226096509e-163	SynTI	Pepd
Kifc3	2.65911670294408e-167	1.06156137398712	0.59	0.237	5.72055776304361e-163	SynTI	Kifc3
Chd3	1.37747781175931e-163	0.855846606628649	0.664	0.284	2.96336801643781e-159	SynTI	Chd3
Slc1a1	1.87946821391674e-163	0.97642418008469	0.399	0.036	4.04329996859907e-159	SynTI	Slc1a1
Kmt2c	4.75229677386919e-163	0.682818741012964	0.902	0.761	1.02236160496248e-158	SynTI	Kmt2c
Psd4	2.44354914262664e-161	0.87492434407494	0.595	0.221	5.25680727053269e-157	SynTI	Psd4
Stxbp6	4.74959553563749e-160	1.02981674558412	0.435	0.065	1.02178048758169e-155	SynTI	Stxbp6
Lima1	4.43708186195966e-158	0.548568412022524	0.942	0.716	9.54549420963381e-154	SynTI	Lima1
Lgals9	5.07563461262349e-158	0.844881841722645	0.653	0.287	1.09192127421369e-153	SynTI	Lgals9
Ppp2r3a	7.17281400466163e-158	0.605882669091367	0.931	0.734	1.54308747682286e-153	SynTI	Ppp2r3a
Huwe1	7.88600786439504e-158	0.618298811359785	0.908	0.76	1.69651687186731e-153	SynTI	Huwe1
Wdfy3	2.25666199916267e-157	0.548374203371113	0.949	0.792	4.85475695879864e-153	SynTI	Wdfy3
Slc35f2	2.94545040461845e-157	0.889058504140771	0.394	0.038	6.33654745545567e-153	SynTI	Slc35f2
Smg1	2.66111047499301e-155	0.580635818730398	0.906	0.787	5.72484696485246e-151	SynTI	Smg1
Lyst	2.33493549949699e-154	0.866853760973599	0.611	0.253	5.02314674006787e-150	SynTI	Lyst
Arhgap26	2.7492410467024e-153	1.13461706449264	0.677	0.397	5.91444226377088e-149	SynTI	Arhgap26
Arhgef16	5.44628797695788e-151	0.831525271133703	0.484	0.107	1.17165993248295e-146	SynTI	Arhgef16
Srek1	4.28546159357843e-150	0.690218917935164	0.791	0.54	9.21931352626527e-146	SynTI	Srek1
Plxna2	1.40040807672261e-148	0.820708661006906	0.575	0.188	3.01269789545336e-144	SynTI	Plxna2
Smyd3	5.9673419487632e-146	0.754002093410489	0.83	0.589	1.28375427343743e-141	SynTI	Smyd3
Echdc2	9.11257463397075e-146	0.674517416134419	0.744	0.343	1.96038818100613e-141	SynTI	Echdc2
Pid1	1.48024697622681e-145	0.988532211112613	0.419	0.07	3.18445531995674e-141	SynTI	Pid1
Kif16b	2.92823257798992e-145	0.814910502532004	0.681	0.376	6.29950674502972e-141	SynTI	Kif16b
Ubtd1	5.26717239420847e-145	0.91084971390564	0.544	0.191	1.13312679716607e-140	SynTI	Ubtd1
Atxn10	3.28941955607808e-144	0.454201138922366	0.978	0.929	7.07652829099077e-140	SynTI	Atxn10
Plbd1	1.74894463679339e-143	0.852132267594503	0.405	0.059	3.76250459713361e-139	SynTI	Plbd1
Shtn1	2.84044262508929e-143	0.869673635651309	0.535	0.175	6.11064421935458e-139	SynTI	Shtn1
Epha4	3.31412836921982e-143	0.920736769211722	0.412	0.066	7.1296843607026e-139	SynTI	Epha4
Pard3	3.77993995226622e-143	0.441211655612399	0.985	0.935	8.13178481931032e-139	SynTI	Pard3
Msrb3	6.8570057758067e-143	0.86223470384364	0.624	0.249	1.4751476525493e-138	SynTI	Msrb3
Cd9	1.3075490013245e-142	0.689935582980162	0.801	0.563	2.81293016654939e-138	SynTI	Cd9
Wwc21	1.62001339481561e-142	0.466453875724068	0.944	0.689	3.48513481626682e-138	SynTI	Wwc2
C2cd2	1.7417372055579e-142	0.688646697092585	0.786	0.508	3.7469992503167e-138	SynTI	C2cd2
Kirrel	4.06356834732461e-142	0.910904375018186	0.551	0.203	8.74195458559944e-138	SynTI	Kirrel
Dlx4os	1.88866416246701e-141	0.809755264825015	0.334	0.017	4.06308321271528e-137	SynTI	Dlx4os
Prr5l	6.55451908336161e-141	0.684374725039777	0.626	0.216	1.41007369040358e-136	SynTI	Prr5l
Clybl	3.72820938251461e-140	0.744711001020469	0.783	0.527	8.02049684460368e-136	SynTI	Clybl
Gkap1	4.51906309577678e-140	0.866555690756536	0.661	0.354	9.72186043794459e-136	SynTI	Gkap1
Ppip5k1	5.21069367359553e-140	0.858808915086802	0.503	0.14	1.12097653000061e-135	SynTI	Ppip5k1
Dvl3	1.06436389703518e-139	0.771855171607766	0.588	0.235	2.28976605169179e-135	SynTI	Dvl3
Stx6	5.39304831615269e-138	0.769960616758275	0.619	0.259	1.16020648425393e-133	SynTI	Stx6
Lmo7	3.93809443375554e-137	0.875798412036891	0.594	0.259	8.4720225553383e-133	SynTI	Lmo7
Pax2	4.61833911879932e-137	0.891227410760928	0.339	0.026	9.93543294627297e-133	SynTI	Pax2
2010111I01Rik	5.31133539400022e-137	0.683104020268064	0.768	0.493	1.14262758331127e-132	SynTI	2010111I01Rik
Lnx2	3.83203035751265e-136	0.638781359958252	0.834	0.575	8.24384690811697e-132	SynTI	Lnx2
Asap2	6.4377879425349e-136	0.850840321963716	0.499	0.151	1.38496132007753e-131	SynTI	Asap2
AC133498.1	6.59941184765848e-136	0.903316233503403	0.423	0.082	1.41973147078677e-131	SynTI	AC133498.1
Anxa11	1.40005110189916e-135	0.779243599300733	0.588	0.23	3.01192993551566e-131	SynTI	Anxa11
Slc11a2	1.53705493402411e-135	0.779378690924987	0.38	0.052	3.30666627956607e-131	SynTI	Slc11a2
Hbegf	2.93329388627845e-135	0.798341928290898	0.353	0.035	6.31039513755082e-131	SynTI	Hbegf
Tsga10	3.80935590244671e-135	0.821629783864821	0.504	0.155	8.19506735293361e-131	SynTI	Tsga10
Slc4a4	8.34944622759435e-135	0.903311144623511	0.391	0.063	1.79621636694237e-130	SynTI	Slc4a4
Steap3	8.78234102623377e-134	0.851258674755746	0.327	0.023	1.88934502497367e-129	SynTI	Steap3
Atp13a3	1.0232085125704e-133	0.690193122000166	0.751	0.499	2.2012284730927e-129	SynTI	Atp13a3
Srsf1	1.84120731058795e-133	0.822221844000761	0.542	0.202	3.96098928726786e-129	SynTI	Srsf1
Pfdn1	2.32159459096066e-133	0.804467512151187	0.553	0.216	4.99444644353367e-129	SynTI	Pfdn1
Slc7a7	1.26299070456703e-132	0.82027658799055	0.449	0.114	2.71707190273504e-128	SynTI	Slc7a7
Vps8	1.96120164745674e-131	0.796789041292912	0.586	0.264	4.21913310417367e-127	SynTI	Vps8
Hipk2	2.02601581088649e-131	0.857178614227756	0.516	0.175	4.3585678139601e-127	SynTI	Hipk2
Stk40	2.62107939124093e-131	0.801320755297705	0.543	0.191	5.63872809437661e-127	SynTI	Stk40
Gm13269	9.77334594179106e-131	1.08042104272778	0.344	0.037	2.10253991245751e-126	SynTI	Gm13269
Reps2	1.79877095181733e-130	0.804251252838345	0.482	0.136	3.86969594864463e-126	SynTI	Reps2
Ankrd6	8.72611201654388e-129	0.856315772876237	0.493	0.15	1.87724847811909e-124	SynTI	Ankrd6
Arhgap42	1.28757105473463e-128	0.802862111000159	0.592	0.256	2.7699516100506e-124	SynTI	Arhgap42
Nlk	1.74056340069482e-128	0.5771098211748	0.87	0.709	3.74447404391477e-124	SynTI	Nlk
Zbtb16	2.40329853535622e-127	1.0031797221946	0.393	0.07	5.17021613911183e-123	SynTI	Zbtb16
Malat1	1.02358538347803e-126	0.317446186447058	1	1	2.20203923547629e-122	SynTI	Malat1
Parvb	1.40458783535299e-125	0.816794020033591	0.39	0.07	3.02168981019488e-121	SynTI	Parvb
Dennd4a	2.29691071696073e-125	0.7842515603345	0.483	0.15	4.94134402539762e-121	SynTI	Dennd4a
Itpkb	3.11277756237569e-125	0.740922825947814	0.37	0.055	6.69651836993881e-121	SynTI	Itpkb
Zfp710	1.11269490128314e-124	0.820776302404437	0.468	0.134	2.39374054113041e-120	SynTI	Zfp710
Arid1b	7.3455857171748e-124	0.38603077127468	0.989	0.965	1.58025585533581e-119	SynTI	Arid1b
Mme	7.66323092234133e-123	0.829492637569873	0.394	0.084	1.64859086832329e-118	SynTI	Mme
Csf1r	1.91436403050077e-122	0.750795944753696	0.497	0.159	4.1183713388163e-118	SynTI	Csf1r
Uaca	1.92548565409217e-121	0.518085547868065	0.9	0.741	4.14229728764848e-117	SynTI	Uaca
Ctsa	6.31815051660723e-119	0.770430936202511	0.426	0.11	1.35922372063771e-114	SynTI	Ctsa
Rbms2	8.62537606081614e-119	0.587352195709239	0.857	0.71	1.85557715196338e-114	SynTI	Rbms2
Micu1	1.04152389056374e-118	0.692580105203626	0.65	0.343	2.24063034576977e-114	SynTI	Micu1
Ppm1h	6.40951927735058e-118	0.791380785627995	0.496	0.167	1.37887988213643e-113	SynTI	Ppm1h
Ctnna1	1.25566671938497e-117	0.47087310320522	0.93	0.824	2.70131581341288e-113	SynTI	Ctnna1
Zdbf2	3.33214563709815e-117	0.847839119599815	0.467	0.148	7.16844490908925e-113	SynTI	Zdbf2
Arid5b	1.21246214860241e-115	0.482773055956574	0.939	0.77	2.60836982028836e-111	SynTI	Arid5b
Dync1h1	7.50616121756479e-115	0.565318009134548	0.838	0.647	1.61480046273471e-110	SynTI	Dync1h1
Spen	2.0985596516541e-114	0.572274116206168	0.838	0.651	4.51463137860347e-110	SynTI	Spen
Eif2ak3	6.01003177111033e-114	0.751890736919221	0.489	0.176	1.29293813491896e-109	SynTI	Eif2ak3
Svil	7.85288963445511e-114	0.654719367293791	0.732	0.444	1.68939214706033e-109	SynTI	Svil
Pax8	7.27365774673162e-113	0.75190465117183	0.309	0.034	1.56478199105437e-108	SynTI	Pax8
Itsn1	7.52414574768728e-113	0.712894790650912	0.627	0.338	1.61866947469997e-108	SynTI	Itsn1
Cd320	1.42208838274232e-112	0.740036832237413	0.398	0.095	3.05933873779354e-108	SynTI	Cd320
Parp4	6.74319512035392e-111	0.553890358014651	0.822	0.62	1.45066356624174e-106	SynTI	Parp4
Zfyve26	1.03122597331693e-110	0.688589922637944	0.621	0.319	2.2184764363967e-106	SynTI	Zfyve26
Nkain1	1.26398144998368e-110	0.806472218387196	0.397	0.097	2.71920329334989e-106	SynTI	Nkain1
Lipg	3.53945326516276e-110	0.714417869117145	0.399	0.097	7.61442580934465e-106	SynTI	Lipg
Asap3	8.32801017919231e-110	0.588189805757593	0.641	0.293	1.79160482984964e-105	SynTI	Asap3
Epn1	1.15843134503228e-109	0.658525521770998	0.663	0.376	2.49213335256794e-105	SynTI	Epn1
Abcd4	7.252217930954e-109	0.645533677052982	0.63	0.314	1.56016964348614e-104	SynTI	Abcd4
Fry	7.63505853022325e-108	0.942644421275936	0.406	0.115	1.64253014160693e-103	SynTI	Fry
Snx27	4.79802005927871e-107	0.705990602003693	0.627	0.36	1.03219805535263e-102	SynTI	Snx27
Frmpd1	3.24437044564433e-106	0.545887787561971	0.647	0.291	6.97961413971465e-102	SynTI	Frmpd1
Zim1	3.31754013760953e-106	0.675300705427784	0.591	0.3	7.13702409803937e-102	SynTI	Zim1
Usp31	3.59520780421092e-106	0.659742087115985	0.532	0.215	7.73437054919896e-102	SynTI	Usp31
Afap1l1	5.78669170740154e-106	0.703070517762373	0.368	0.079	1.24489098701329e-101	SynTI	Afap1l1
Rbm39	7.09333943928646e-106	0.350898609401321	0.975	0.958	1.5259901135737e-101	SynTI	Rbm39
Vmp1	1.24476547330416e-104	0.602699094351943	0.726	0.484	2.67786396271924e-100	SynTI	Vmp1
Klc1	2.81011394853793e-103	0.56434465956136	0.709	0.42	6.04539813748964e-99	SynTI	Klc1
Plat	3.47624320391614e-103	0.664177150954075	0.291	0.032	7.4784420045848e-99	SynTI	Plat
Pik3cb	5.77791900565006e-102	0.602990802076918	0.714	0.472	1.2430037156855e-97	SynTI	Pik3cb
Slc39a10	1.07664136887763e-101	0.681232789836874	0.395	0.108	2.31617857686644e-97	SynTI	Slc39a10
Snx8	1.71304727697731e-101	0.678277199568189	0.41	0.113	3.6852786069613e-97	SynTI	Snx8
Srrm2	3.57751815854347e-101	0.47457758306432	0.935	0.883	7.69631481447457e-97	SynTI	Srrm2
Slc16a1	6.25452136637348e-101	0.720293772467875	0.465	0.175	1.34553518154793e-96	SynTI	Slc16a1
Slc38a2	1.04047412163512e-100	0.660393293808894	0.592	0.307	2.23837197787364e-96	SynTI	Slc38a2
Fam234a	3.63623896653919e-100	0.719665405527356	0.523	0.232	7.82264088871575e-96	SynTI	Fam234a
Wnk4	6.5907040879812e-100	0.662313035339882	0.267	0.023	1.41785817044739e-95	SynTI	Wnk4
Agfg2	2.21547511517613e-99	0.654262818767817	0.449	0.151	4.7661516152784e-95	SynTI	Agfg2
Tmcc3	2.63541879681512e-99	0.54461713544819	0.822	0.623	5.66957645758836e-95	SynTI	Tmcc3
Tmem116	2.95262266827793e-99	0.799133760077964	0.44	0.161	6.35197714626631e-95	SynTI	Tmem116
Nsmce2	9.11491746571121e-99	0.656219531929204	0.73	0.505	1.96089219439845e-94	SynTI	Nsmce2
Ubac2	1.81666212986285e-98	0.658275776493279	0.68	0.457	3.90818523997396e-94	SynTI	Ubac2
Rab12	2.31722477233464e-98	0.683038307021117	0.517	0.24	4.98504565272352e-94	SynTI	Rab12
Fam105a	2.737025075174e-98	0.680077682211951	0.272	0.026	5.88816204422183e-94	SynTI	Fam105a
Aco1	3.13806841102271e-98	0.644509434432835	0.519	0.234	6.75092657263316e-94	SynTI	Aco1
Nhsl1	1.60645690370211e-97	0.513490532078616	0.7	0.411	3.45597073693435e-93	SynTI	Nhsl1
Susd1	3.48113629244504e-97	0.676754027005739	0.416	0.13	7.48896850593701e-93	SynTI	Susd1
Atp6v0b	3.89135131430244e-97	0.610754704122017	0.59	0.286	8.37146408245884e-93	SynTI	Atp6v0b
Senp3	1.29633348325678e-95	0.628112367594486	0.525	0.233	2.78880222253031e-91	SynTI	Senp3
Vgll41	1.65504939232986e-95	0.343973227004105	0.898	0.511	3.56050775771923e-91	SynTI	Vgll4
Stim1	3.04848603652819e-95	0.656996786233804	0.622	0.369	6.55820801038309e-91	SynTI	Stim1
Plekha1	7.1772843523959e-95	0.640245543855713	0.578	0.292	1.54404918273093e-90	SynTI	Plekha1
Prr12	9.29332523943811e-95	0.662877077036769	0.431	0.146	1.99927305876032e-90	SynTI	Prr12
Mtss11	9.34049421113743e-95	0.31592586959388	0.935	0.688	2.00942051964199e-90	SynTI	Mtss1
Mtmr10	9.4568040309425e-95	0.685524959576865	0.482	0.204	2.03444225117666e-90	SynTI	Mtmr10
Ap1s3	1.53509715607484e-94	0.602866616522174	0.673	0.427	3.30245451186381e-90	SynTI	Ap1s3
Mtor	1.75318179523422e-94	0.637220887805465	0.635	0.386	3.77161999608737e-90	SynTI	Mtor
St3gal5	2.41464922569865e-94	0.685841414435072	0.353	0.086	5.19463487924551e-90	SynTI	St3gal5
Rab11fip4	2.96122647311023e-94	0.577571466305951	0.256	0.022	6.37048651160204e-90	SynTI	Rab11fip4
Maoa	8.60123339491084e-94	0.560271960064751	0.561	0.243	1.85038334024717e-89	SynTI	Maoa
Slc26a7	3.97404963430193e-93	0.623969368558562	0.286	0.041	8.54937297827374e-89	SynTI	Slc26a7
Yap1	4.09026160859254e-93	0.615721966262776	0.612	0.352	8.79937979856513e-89	SynTI	Yap1
Cmtm7	9.24016760078261e-93	0.642968776627541	0.341	0.077	1.98783725595636e-88	SynTI	Cmtm7
Mroh1	2.41251193020997e-92	0.557413544945773	0.628	0.332	5.1900369154607e-88	SynTI	Mroh1
Nrcam	3.09760146848551e-92	0.648859581109174	0.293	0.047	6.66387003915287e-88	SynTI	Nrcam
Lgals8	4.99924576314165e-92	0.641969302006063	0.395	0.123	1.07548774102466e-87	SynTI	Lgals8
Helz	6.25566753841818e-92	0.315998745954131	0.97	0.925	1.3457817575399e-87	SynTI	Helz
Sorbs3	1.12495021995549e-91	0.652322277571845	0.315	0.065	2.42010540819024e-87	SynTI	Sorbs3
Dysf	1.44606409254715e-91	0.386578021134844	0.947	0.875	3.11091768229668e-87	SynTI	Dysf
Dlg1	5.65326538754594e-91	0.522985712062039	0.771	0.599	1.21618698282276e-86	SynTI	Dlg1
Fhdc1	2.42737242190438e-90	0.63066591302958	0.342	0.084	5.22200629124289e-86	SynTI	Fhdc1
Anxa3	4.03244868087091e-90	0.532897146483787	0.624	0.319	8.67500684715759e-86	SynTI	Anxa3
Fgfr2	5.00417846183402e-90	0.510665800565155	0.834	0.693	1.07654891249435e-85	SynTI	Fgfr2
Slc22a4	4.14125104383876e-89	0.651845286393468	0.331	0.076	8.90907337061032e-85	SynTI	Slc22a4
Csnk1g3	7.44173358461169e-89	0.598472471922321	0.657	0.426	1.60094014605751e-84	SynTI	Csnk1g3
Folr2	7.77183597402731e-89	0.592298821911223	0.267	0.034	1.6719550730925e-84	SynTI	Folr2
Wipi2	8.36856839350351e-89	0.632878783505398	0.442	0.175	1.80033011849441e-84	SynTI	Wipi2
Polg	1.41149156153884e-88	0.556584485838046	0.713	0.489	3.03654179633851e-84	SynTI	Polg
Dlx3	6.43570223838307e-88	0.58828617574507	0.269	0.036	1.38451262254335e-83	SynTI	Dlx3
Myo5b	9.27924355322007e-88	0.696650943455282	0.391	0.124	1.99624366560423e-83	SynTI	Myo5b
Tspan5	4.06318974760728e-87	0.932431797009963	0.364	0.112	8.74114010402754e-83	SynTI	Tspan5
Slc39a13	4.25375525741882e-87	0.614716150029901	0.312	0.066	9.15110368528511e-83	SynTI	Slc39a13
Ipmk	4.439646295643e-87	0.656510857904863	0.372	0.11	9.55101107581678e-83	SynTI	Ipmk
Idh2	8.81215920784546e-87	0.615215619899451	0.317	0.071	1.89575981038379e-82	SynTI	Idh2
Cdkn1c	3.41663110733143e-86	0.622960113046327	0.683	0.459	7.3501985012021e-82	SynTI	Cdkn1c
Plxnb1	6.85808741003561e-85	0.544968731600641	0.703	0.456	1.47538034452096e-80	SynTI	Plxnb1
Tfeb	9.51992646792126e-85	0.62246825536277	0.438	0.168	2.0480217810439e-80	SynTI	Tfeb
Pan3	1.38304018889747e-84	0.442077541671733	0.876	0.798	2.97533435837514e-80	SynTI	Pan3
Abi2	1.66896651833111e-84	0.662794151468403	0.411	0.156	3.59044767088571e-80	SynTI	Abi2
Macrod1	2.06712798310849e-84	0.659360303842936	0.274	0.046	4.44701243006129e-80	SynTI	Macrod1
Itga5	2.44005757725393e-84	0.603443349222105	0.555	0.295	5.24929586594637e-80	SynTI	Itga5
Atp6v0a1	8.97400070892879e-84	0.541131736434431	0.66	0.411	1.93057677251185e-79	SynTI	Atp6v0a1
Clcn5	9.16010956759249e-84	0.651737725792513	0.49	0.22	1.97061437127617e-79	SynTI	Clcn5
Mark3	1.06893210261e-83	0.388000494778571	0.892	0.792	2.2995936323449e-79	SynTI	Mark3
Arhgef10l	1.12405607423196e-83	0.576852726672586	0.408	0.129	2.41818183249522e-79	SynTI	Arhgef10l
Frmd4a	1.17560036060625e-83	0.526114972147583	0.623	0.353	2.52906905577222e-79	SynTI	Frmd4a
5031425E22Rik	3.79493347868488e-83	0.515767882560902	0.768	0.619	8.16404039269478e-79	SynTI	5031425E22Rik
Pmepa1	4.10435715817657e-83	0.636246271543006	0.498	0.237	8.82970355438526e-79	SynTI	Pmepa1
Trpm6	4.63435894753963e-83	0.478672201979193	0.619	0.319	9.96989640384201e-79	SynTI	Trpm6
Utrn1	5.29748204478503e-83	0.403673586260943	0.909	0.792	1.1396473122946e-78	SynTI	Utrn
Kdm5c	1.506343207454e-82	0.517313363371467	0.698	0.479	3.2405961421958e-78	SynTI	Kdm5c
Pex14	2.53043985019704e-82	0.400254221940743	0.949	0.841	5.44373524972889e-78	SynTI	Pex14
Lgmn	6.1039808500296e-82	0.625022772192147	0.45	0.193	1.31314940026687e-77	SynTI	Lgmn
Renbp	2.41022279428392e-81	0.578398501916947	0.36	0.108	5.185112297343e-77	SynTI	Renbp
Elf1	7.13788764158797e-81	0.473221659261491	0.805	0.614	1.53557376833482e-76	SynTI	Elf1
Dennd1b	9.93042828552755e-81	0.532467056085904	0.672	0.474	2.13633303706554e-76	SynTI	Dennd1b
Tfdp2	1.56084380430583e-80	0.665623348945233	0.4	0.15	3.35784327620313e-76	SynTI	Tfdp2
Dlg4	5.51410104879998e-80	0.576563621701444	0.251	0.036	1.18624855862834e-75	SynTI	Dlg4
Snx9	5.76472224056771e-80	0.447614519550297	0.872	0.69	1.24016469561333e-75	SynTI	Snx9
Pdgfb	5.94389451259606e-80	0.594560982159682	0.305	0.069	1.27871002649479e-75	SynTI	Pdgfb
Dhx40	2.41021386433538e-79	0.595145781220301	0.364	0.115	5.1850930863447e-75	SynTI	Dhx40
Gns	2.57606158639179e-79	0.589461407353974	0.43	0.171	5.54188129080465e-75	SynTI	Gns
Slit3	2.81602334486249e-79	0.810166674587547	0.31	0.077	6.05811102180267e-75	SynTI	Slit3
Aebp1	3.17696116324614e-79	0.567693205854623	0.254	0.038	6.83459655049142e-75	SynTI	Aebp1
Spag9	3.65724769885316e-79	0.501109511486346	0.753	0.574	7.86783697454281e-75	SynTI	Spag9
Eml2	5.21271086141579e-79	0.597041301547072	0.425	0.173	1.12141048761638e-74	SynTI	Eml2
Atp6v0d1	1.16954416387138e-78	0.593195786271189	0.615	0.387	2.5160403597365e-74	SynTI	Atp6v0d1
Evi5	4.73500990614267e-78	0.626163835270271	0.56	0.335	1.01864268110847e-73	SynTI	Evi5
Ppfibp2	5.90761241645595e-78	0.458212884985152	0.827	0.654	1.27090465915217e-73	SynTI	Ppfibp2
Flcn	8.60490334103381e-78	0.599072719134931	0.304	0.074	1.8511728557566e-73	SynTI	Flcn
Cacnb2	1.8167322308328e-77	0.561590268955521	0.283	0.058	3.90833604819061e-73	SynTI	Cacnb2
Mfn1	2.02622849290117e-77	0.556204604033246	0.49	0.236	4.35902535677828e-73	SynTI	Mfn1
Zfp292	3.24373244885012e-77	0.584683142324193	0.592	0.354	6.97824161721125e-73	SynTI	Zfp292
Tnk2	6.51418870981536e-77	0.592689858714902	0.587	0.352	1.40139741714258e-72	SynTI	Tnk2
Bin2	1.17129403880094e-76	0.637718094729829	0.373	0.132	2.51980486567246e-72	SynTI	Bin2
Map3k5	1.68940241251834e-76	0.60430736881569	0.418	0.162	3.6344114100507e-72	SynTI	Map3k5
Ifnlr1	4.38543156781106e-75	0.570686572184089	0.261	0.049	9.43437893183194e-71	SynTI	Ifnlr1
Kif21a	1.19864632223003e-74	0.605858964982251	0.369	0.125	2.57864783301347e-70	SynTI	Kif21a
Psap	4.05509716025709e-74	0.510626818856595	0.686	0.483	8.72373052086107e-70	SynTI	Psap
Fbxl20	4.69641190984364e-74	0.596577256985845	0.516	0.283	1.01033909416466e-69	SynTI	Fbxl20
Carmil1	2.7932120137991e-73	0.350159241534891	0.902	0.805	6.00903700528601e-69	SynTI	Carmil1
Capn2	2.90535511504154e-73	0.528160515148897	0.266	0.053	6.25029045898887e-69	SynTI	Capn2
Naga	3.58820971028914e-73	0.526691210322173	0.288	0.066	7.71931554974502e-69	SynTI	Naga
St5	1.99786901748573e-72	0.574475039790481	0.676	0.507	4.29801561731705e-68	SynTI	St5
Ovol2	3.80131333845288e-72	0.568279994730126	0.431	0.187	8.17776538501367e-68	SynTI	Ovol2
4932438A13Rik	9.6032090037423e-72	0.434928927557739	0.872	0.705	2.06593835297508e-67	SynTI	4932438A13Rik
Ubr4	2.66661760248745e-71	0.449815570674647	0.758	0.587	5.73669444823124e-67	SynTI	Ubr4
Rab11fip3	3.38295712306163e-71	0.55055594789717	0.584	0.347	7.27775565884248e-67	SynTI	Rab11fip3
Tulp1	5.34937666347951e-71	0.446349833273249	0.556	0.26	1.15081140161435e-66	SynTI	Tulp1
Zdhhc1	1.87305911900137e-70	0.573699655325331	0.28	0.07	4.02951208270764e-66	SynTI	Zdhhc1
Serpine2	1.92039120603344e-70	0.621779867222724	0.48	0.235	4.13133760153975e-66	SynTI	Serpine2
Kazn	3.45976866390422e-70	0.366586828620561	0.901	0.701	7.44300032665714e-66	SynTI	Kazn
Pstpip1	1.04738965448132e-69	0.612770525152542	0.391	0.168	2.25324936368566e-65	SynTI	Pstpip1
Dhrs3	4.08210392439113e-69	0.571110516753925	0.324	0.106	8.78183017254263e-65	SynTI	Dhrs3
Usp29	5.95647861599694e-69	0.576031556720869	0.572	0.348	1.28141724465942e-64	SynTI	Usp29
Tns4	1.00736752998538e-68	0.521861790422832	0.371	0.134	2.16714976725755e-64	SynTI	Tns4
Zc3h12c	5.17412776013224e-68	0.545615908342127	0.426	0.188	1.11311010503725e-63	SynTI	Zc3h12c
Mirt1	7.28552942760808e-68	0.510505886737917	0.271	0.064	1.56733594576133e-63	SynTI	Mirt1
Osbpl2	8.0161115875363e-68	0.544351049349135	0.44	0.203	1.72450608582668e-63	SynTI	Osbpl2
Ppp1r9a	1.89422416146692e-67	0.405862216072996	0.857	0.732	4.07504443856379e-63	SynTI	Ppp1r9a
Slc17a5	3.72067840655533e-66	0.523926153402283	0.284	0.077	8.00429545602249e-62	SynTI	Slc17a5
Slc44a1	4.02631760133335e-66	0.583718345492707	0.429	0.203	8.66181705574844e-62	SynTI	Slc44a1
Pced1b	4.62506483083992e-66	0.612836754934621	0.439	0.214	9.94990197058593e-62	SynTI	Pced1b
Epb41l3	6.14317793376665e-66	0.504606821505912	0.287	0.075	1.32158186889122e-61	SynTI	Epb41l3
Luzp1	7.73314446513245e-66	0.412661233355222	0.827	0.71	1.66363136878394e-61	SynTI	Luzp1
Leng8	1.34368411172003e-65	0.429684372773752	0.752	0.577	2.89066762954329e-61	SynTI	Leng8
Dgke	4.68433067412322e-65	0.536982893301395	0.344	0.125	1.00774005792413e-60	SynTI	Dgke
Mbnl2	1.0550109202451e-64	0.313819510151642	0.955	0.841	2.26964499272328e-60	SynTI	Mbnl2
Rabep1	1.06260240111076e-64	0.443249389733048	0.726	0.539	2.28597654550957e-60	SynTI	Rabep1
Eps15	3.21688435977282e-64	0.479964067746344	0.629	0.42	6.92048332317927e-60	SynTI	Eps15
Dab2	1.42490826966142e-63	0.493527382337487	0.259	0.062	3.06540516052262e-59	SynTI	Dab2
Oxct1	2.12621647915578e-63	0.52334988051229	0.442	0.202	4.57412951160784e-59	SynTI	Oxct1
Tpd52	3.11127081062285e-63	0.489264703881971	0.655	0.464	6.69327689489294e-59	SynTI	Tpd52
Ccdc162	6.78810638749854e-63	0.549063406656561	0.41	0.189	1.46032532714256e-58	SynTI	Ccdc162
Ass1	7.25966190531537e-63	0.524207873623807	0.363	0.139	1.5617710656905e-58	SynTI	Ass1
Sema4b	1.05600491841664e-62	0.521033248639965	0.332	0.118	2.27178338098972e-58	SynTI	Sema4b
Ubr5	9.70479522879996e-62	0.365635788754106	0.852	0.783	2.08779259757174e-57	SynTI	Ubr5
Abcc1	1.43513058800111e-61	0.511945644319575	0.487	0.264	3.08739643396679e-57	SynTI	Abcc1
Phc3	5.19455377560093e-61	0.559004794119367	0.486	0.277	1.11750435374503e-56	SynTI	Phc3
Mertk	1.01268511569367e-60	0.4877179643182	0.584	0.38	2.17858948939179e-56	SynTI	Mertk
Aak1	2.82703214214173e-60	0.488666707906675	0.636	0.452	6.0817942473895e-56	SynTI	Aak1
Rab10	9.92945117548443e-60	0.466756906931575	0.777	0.661	2.13612283138197e-55	SynTI	Rab10
Bclaf3	1.50251429417191e-59	0.39244143170003	0.81	0.623	3.23235900105203e-55	SynTI	Bclaf3
Tdrp	2.16455888771587e-59	0.445905457278665	0.383	0.154	4.65661553514316e-55	SynTI	Tdrp
Rbpj	3.75090192546748e-59	0.541384789149581	0.449	0.239	8.06931531225818e-55	SynTI	Rbpj
Ccnl2	5.10690090758518e-59	0.442802246178152	0.694	0.512	1.0986475922488e-54	SynTI	Ccnl2
Nav1	1.66373757196243e-58	0.492451724705677	0.534	0.312	3.57919863856278e-54	SynTI	Nav1
Myo1d	1.98081946368489e-58	0.369722231126021	0.786	0.629	4.2613369122253e-54	SynTI	Myo1d
St6galnac3	3.20746539446482e-58	0.437715258519118	0.363	0.146	6.90022030311217e-54	SynTI	St6galnac3
Serpinb9e	4.67983389477511e-58	0.491038765270442	0.399	0.183	1.00677266578297e-53	SynTI	Serpinb9e
Klf9	5.65551266867125e-58	0.477745212985274	0.256	0.07	1.21667044041125e-53	SynTI	Klf9
Sltm	1.20807266525795e-57	0.422562626402908	0.748	0.587	2.59892672476944e-53	SynTI	Sltm
Nabp1	1.78091080189817e-57	0.488500437112826	0.47	0.256	3.83127340812354e-53	SynTI	Nabp1
Slc16a9	4.74781469289781e-57	0.430197631689335	0.409	0.178	1.02139737488311e-52	SynTI	Slc16a9
Itgav	2.13084054470372e-56	0.494765952927248	0.429	0.213	4.58407726382112e-52	SynTI	Itgav
Golgb1	3.36521266685833e-56	0.436168692050764	0.77	0.631	7.23958201021233e-52	SynTI	Golgb1
Bcor	9.02039096567068e-56	0.391360360890099	0.597	0.352	1.94055670844473e-51	SynTI	Bcor
Tead4	1.50432224931605e-55	0.408716786939288	0.519	0.284	3.23624845495363e-51	SynTI	Tead4
Tbc1d14	1.70434111031885e-55	0.525194204472643	0.343	0.143	3.66654903062895e-51	SynTI	Tbc1d14
Ergic1	3.24638262374057e-55	0.504756549773969	0.314	0.118	6.98394293845309e-51	SynTI	Ergic1
Kcnq5	3.51255150370629e-55	0.736803704635229	0.324	0.126	7.55655204992334e-51	SynTI	Kcnq5
Sbno1	3.98718211677979e-55	0.406952590970684	0.701	0.533	8.57762488782837e-51	SynTI	Sbno1
Plekha5	5.20421271205757e-55	0.36144524285099	0.856	0.716	1.11958228074495e-50	SynTI	Plekha5
Kif5a	1.13609467502671e-54	0.46528577464574	0.292	0.101	2.44408047438496e-50	SynTI	Kif5a
Spg11	1.43995904468229e-54	0.478587203448672	0.418	0.211	3.09778389282501e-50	SynTI	Spg11
Dmxl1	1.60304886994741e-54	0.420415178277842	0.673	0.517	3.44863903391786e-50	SynTI	Dmxl1
Stat1	1.66616739958288e-54	0.529355166311541	0.387	0.189	3.58442592672264e-50	SynTI	Stat1
Dlgap4	2.1411129579137e-54	0.407338685288151	0.778	0.599	4.60617630635974e-50	SynTI	Dlgap4
Nsf	2.87688841338841e-54	0.401422648532366	0.779	0.665	6.18905004372249e-50	SynTI	Nsf
Tpst2	3.39208474377315e-54	0.502085948406436	0.475	0.272	7.29739190927918e-50	SynTI	Tpst2
Dennd1a	4.80118106289017e-54	0.287704122494044	0.955	0.896	1.03287808205956e-49	SynTI	Dennd1a
Fam90a1b	1.09652476924126e-53	0.483479378701084	0.453	0.253	2.35895373606873e-49	SynTI	Fam90a1b
Purg	1.11840014852161e-53	0.471337811370574	0.29	0.101	2.40601423951455e-49	SynTI	Purg
Hibadh	1.68066264234184e-53	0.474068103204507	0.656	0.512	3.61560954247e-49	SynTI	Hibadh
Srr	5.52601305488592e-53	0.467602071815013	0.509	0.308	1.18881118849761e-48	SynTI	Srr
Usp1	6.52091296067401e-53	0.453624809330387	0.288	0.099	1.4028440052298e-48	SynTI	Usp1
Chst8	1.46619882648798e-52	0.430939870063879	0.29	0.094	3.1542335354236e-48	SynTI	Chst8
Tbc1d24	2.14096898126801e-52	0.458560935966767	0.26	0.082	4.60586656940187e-48	SynTI	Tbc1d24
Bst2	3.8221339035007e-52	0.409897981963702	0.331	0.125	8.22255666660105e-48	SynTI	Bst2
Fnip2	4.54396259616105e-52	0.505639148610672	0.493	0.3	9.77542673312127e-48	SynTI	Fnip2
Syngr1	1.27863127437841e-51	0.471194983956259	0.351	0.154	2.75071946057028e-47	SynTI	Syngr1
Kif13b	1.28832252007427e-51	0.357905143409042	0.809	0.67	2.77156823743577e-47	SynTI	Kif13b
Arhgef18	1.94083320060217e-51	0.404565704345171	0.645	0.468	4.17531446445545e-47	SynTI	Arhgef18
Abhd16a	1.99015615414513e-51	0.443963843442617	0.456	0.248	4.28142293441243e-47	SynTI	Abhd16a
Map3k4	2.10885949306292e-51	0.468311931518166	0.355	0.158	4.53678942742625e-47	SynTI	Map3k4
Vgll3	2.7618363563907e-51	0.411051587335972	0.306	0.112	5.94153855350332e-47	SynTI	Vgll3
Ttc3	6.15245920233284e-51	0.405386572058736	0.644	0.461	1.32357854819786e-46	SynTI	Ttc3
Snx7	6.33178571254069e-51	0.488876574072966	0.419	0.219	1.36215706033888e-46	SynTI	Snx7
Parva	7.43737898634349e-51	0.33347550438218	0.886	0.773	1.60000334133208e-46	SynTI	Parva
Wwp1	7.54314821320301e-51	0.433689602659995	0.605	0.429	1.62275747510636e-46	SynTI	Wwp1
Myl6	8.2348038984274e-51	0.481498030571184	0.43	0.231	1.77155336266869e-46	SynTI	Myl6
Mtch1	1.13711702514921e-50	0.421427236438578	0.301	0.113	2.4462798562035e-46	SynTI	Mtch1
Dnajb6	1.22029811752342e-50	0.345835039580481	0.797	0.682	2.62522734022814e-46	SynTI	Dnajb6
Sdc4	2.40910880201248e-50	0.402345920177373	0.262	0.082	5.18271576576945e-46	SynTI	Sdc4
Rab24	2.96377532619948e-50	0.467503060802557	0.574	0.392	6.37596985925293e-46	SynTI	Rab24
Wdr66	4.97967674808316e-50	0.507325734661436	0.263	0.093	1.07127785881513e-45	SynTI	Wdr66
Insr	7.26936122987442e-50	0.467693043574826	0.476	0.282	1.56385768138288e-45	SynTI	Insr
Bcas3	7.77449485321665e-50	0.377326510502844	0.78	0.644	1.6725270777725e-45	SynTI	Bcas3
Mark1	8.46499701633353e-50	0.446108105969171	0.28	0.099	1.82107480812383e-45	SynTI	Mark1
Rbpms	1.13908023111396e-49	0.410807725628143	0.734	0.611	2.45050330119546e-45	SynTI	Rbpms
Fblim1	1.87605800430158e-49	0.461229952139457	0.374	0.179	4.03596358465399e-45	SynTI	Fblim1
Anapc1	3.74065729794817e-49	0.467426365323103	0.533	0.352	8.0472760450759e-45	SynTI	Anapc1
Pdzd2	1.53516420283703e-48	0.421177358262642	0.289	0.103	3.30259874956331e-44	SynTI	Pdzd2
Stx2	2.2766520486725e-48	0.503969143289792	0.3	0.128	4.89776155230914e-44	SynTI	Stx2
Lncpint	4.00565483200678e-48	0.471770296822039	0.435	0.238	8.61736524009619e-44	SynTI	Lncpint
Bptf	9.32514971751282e-48	0.368996722519601	0.702	0.546	2.00611945872853e-43	SynTI	Bptf
Rnf111	1.1340840307387e-47	0.407085962410918	0.66	0.519	2.43975497532817e-43	SynTI	Rnf111
Pip5k1b	1.44247219230614e-47	0.569645210617614	0.467	0.279	3.1031904273082e-43	SynTI	Pip5k1b
Snx29	1.80527358482239e-47	0.431008915930788	0.643	0.473	3.8836850630284e-43	SynTI	Snx29
Exoc3l4	1.98578461148465e-47	0.385368626605246	0.649	0.443	4.27201843468693e-43	SynTI	Exoc3l4
Cnn2	2.14335070906454e-47	0.399109140720637	0.418	0.211	4.61099038041054e-43	SynTI	Cnn2
Cdk16	3.41890095869786e-47	0.448166575071411	0.375	0.187	7.35508163244671e-43	SynTI	Cdk16
Eml4	6.62204092834644e-47	0.42064865035793	0.667	0.517	1.42459966491517e-42	SynTI	Eml4
Lyn	1.45188405191932e-46	0.451605982855091	0.433	0.24	3.12343816089403e-42	SynTI	Lyn
Cryl1	2.02622351778848e-46	0.456551980770333	0.415	0.208	4.35901465381836e-42	SynTI	Cryl1
Sh3d21	2.7174228062227e-46	0.378324940000472	0.274	0.095	5.84599168302689e-42	SynTI	Sh3d21
Maged11	3.86421583339382e-46	0.281864688508892	0.74	0.557	8.31308752238013e-42	SynTI	Maged1
Stk4	3.88297490194544e-46	0.477671814781382	0.421	0.235	8.35344390655523e-42	SynTI	Stk4
Pard6b	5.90256497943387e-46	0.357187048190945	0.333	0.139	1.26981880402561e-41	SynTI	Pard6b
Rassf8	6.16275548927348e-46	0.457847279540931	0.524	0.349	1.3257935884074e-41	SynTI	Rassf8
Strada	8.4096937827219e-46	0.443311244394046	0.406	0.222	1.80917742347696e-41	SynTI	Strada
Pim1	1.02705158626827e-45	0.418075949877019	0.359	0.168	2.20949607753893e-41	SynTI	Pim1
AU018091	3.91524793668737e-45	0.39656062558167	0.264	0.094	8.42287288619554e-41	SynTI	AU018091
Sptbn1	5.73522545721376e-45	0.297193939104557	0.774	0.625	1.2338190526104e-40	SynTI	Sptbn1
Rnf214	9.67709538453594e-45	0.458794277076195	0.501	0.335	2.08183353007522e-40	SynTI	Rnf214
Kalrn	1.22080235694644e-44	0.547786198592708	0.38	0.201	2.62631211049888e-40	SynTI	Kalrn
Rnf145	1.96808578810924e-44	0.460727129383589	0.395	0.219	4.23394295595941e-40	SynTI	Rnf145
Cep170b	3.0398601247932e-44	0.391201553648603	0.254	0.087	6.53965108646762e-40	SynTI	Cep170b
Prickle1	5.216389007322e-44	0.563075785293987	0.458	0.286	1.12220176714518e-39	SynTI	Prickle1
Whamm	7.29818455671329e-44	0.428947254940194	0.378	0.193	1.57005844368573e-39	SynTI	Whamm
Anxa5	1.36387295944e-43	0.32249956432341	0.567	0.36	2.93409989764327e-39	SynTI	Anxa5
Pdcd4	3.41056315477588e-43	0.432202009160878	0.419	0.237	7.33714451486934e-39	SynTI	Pdcd4
Mfge8	5.04823874996013e-43	0.345775019609513	0.276	0.104	1.08602760227892e-38	SynTI	Mfge8
Arid3a	7.26120728504128e-43	0.427911355386423	0.453	0.267	1.56210352323093e-38	SynTI	Arid3a
Acsl3	9.49710235150891e-43	0.399877427143642	0.278	0.111	2.04311162888011e-38	SynTI	Acsl3
Golga4	1.11208622065152e-42	0.386406868783569	0.537	0.363	2.39243108648761e-38	SynTI	Golga4
Aebp2	1.28631384812824e-42	0.424684806209347	0.582	0.417	2.76724698147829e-38	SynTI	Aebp2
Smchd1	1.5879998893673e-42	0.321686582371477	0.815	0.698	3.41626416199588e-38	SynTI	Smchd1
Dot1l	4.34295289444204e-42	0.407336695303232	0.497	0.323	9.34299456181316e-38	SynTI	Dot1l
Tmbim1	7.37083906672131e-42	0.419884884977836	0.297	0.132	1.58568860842375e-37	SynTI	Tmbim1
Wipf2	7.61063535771218e-42	0.487691296491467	0.481	0.31	1.63727598450462e-37	SynTI	Wipf2
Grb10	9.74402277285667e-42	0.323002919035425	0.778	0.664	2.09623161912466e-37	SynTI	Grb10
Osbpl9	1.18926073270486e-41	0.332388058180491	0.699	0.559	2.55845661426797e-37	SynTI	Osbpl9
Ugp2	1.71528594364458e-41	0.438614504460303	0.493	0.328	3.69009465056258e-37	SynTI	Ugp2
Lrrc8b	3.31376919664214e-41	0.494298650831225	0.279	0.118	7.12891167273623e-37	SynTI	Lrrc8b
Sin3b	3.4632870439125e-41	0.310437496874297	0.854	0.754	7.45056941756897e-37	SynTI	Sin3b
Afap1	4.16869076464329e-41	0.293387445098141	0.821	0.637	8.96810444197712e-37	SynTI	Afap1
Bcr	5.23221275094555e-41	0.436527829128179	0.368	0.198	1.12560592911092e-36	SynTI	Bcr
Las1l	6.50894269654115e-41	0.339074169068019	0.745	0.599	1.4002688423069e-36	SynTI	Las1l
Papss1	1.19723644553898e-40	0.43344931312478	0.362	0.195	2.57561476528802e-36	SynTI	Papss1
Patj	3.49610530995378e-40	0.311483793156488	0.821	0.732	7.52117135330356e-36	SynTI	Patj
Ctsb	3.96741124704036e-40	0.43616254639118	0.39	0.219	8.53509181575794e-36	SynTI	Ctsb
Pabpc4	4.76024694992678e-40	0.417185096990125	0.36	0.189	1.02407192633775e-35	SynTI	Pabpc4
Dnase1l1	1.08421916680351e-39	0.422808771764823	0.278	0.12	2.33248069354439e-35	SynTI	Dnase1l1
Arglu1	1.26874620434083e-39	0.296961351221432	0.726	0.588	2.72945370939843e-35	SynTI	Arglu1
Smarca2	1.89066877800675e-39	0.32912892695526	0.606	0.432	4.06739574212592e-35	SynTI	Smarca2
Ankrd33b	2.70056318544117e-39	0.349569438272696	0.746	0.595	5.80972158083958e-35	SynTI	Ankrd33b
Ppp1r37	4.00450898209382e-39	0.393712352762511	0.459	0.284	8.61490017317843e-35	SynTI	Ppp1r37
Lmbrd1	4.08704961944446e-39	0.415327751547385	0.313	0.151	8.79246984631086e-35	SynTI	Lmbrd1
Camk2d	3.03039064359116e-38	0.292789129514211	0.85	0.742	6.51927939155767e-34	SynTI	Camk2d
Ablim1	3.39045633582719e-38	0.414882160636927	0.258	0.102	7.29388871526503e-34	SynTI	Ablim1
Hs6st1	4.39232503366852e-38	0.385763824246772	0.276	0.118	9.44920884493109e-34	SynTI	Hs6st1
Gnb4	6.45202542336799e-38	0.393368653840275	0.369	0.196	1.38802422932915e-33	SynTI	Gnb4
Pdpk1	8.01380709997954e-38	0.365651131600613	0.596	0.461	1.7240103214186e-33	SynTI	Pdpk1
Ddr1	1.46991839028316e-37	0.445699333632239	0.456	0.3	3.16223543301617e-33	SynTI	Ddr1
Lmnb1	1.96126732985958e-37	0.358568380062477	0.384	0.209	4.21927440672692e-33	SynTI	Lmnb1
Ehd1	1.96905194352328e-37	0.345578274723773	0.284	0.122	4.23602144610163e-33	SynTI	Ehd1
Fam13b	3.87451902291779e-37	0.318278670760133	0.716	0.602	8.33525277400305e-33	SynTI	Fam13b
Bri3	4.85928167029884e-37	0.372709496451708	0.263	0.11	1.04537726573139e-32	SynTI	Bri3
Mpp5	1.1295725301184e-36	0.388175137870653	0.468	0.304	2.43004938404371e-32	SynTI	Mpp5
Kmt2a	1.15399091668794e-36	0.354434875274544	0.684	0.565	2.48258065907076e-32	SynTI	Kmt2a
Arhgef37	1.81590334895063e-36	0.402385221306124	0.31	0.152	3.90655287459748e-32	SynTI	Arhgef37
Herc2	3.27366522424444e-36	0.34571347362197	0.672	0.559	7.04263599691707e-32	SynTI	Herc2
Pptc7	4.76549408104019e-36	0.390412572648325	0.331	0.17	1.02520074165418e-31	SynTI	Pptc7
Lzts2	7.9042136753028e-36	0.356067085131669	0.657	0.522	1.70043348796789e-31	SynTI	Lzts2
Anxa2	1.44276774006602e-35	0.302889457471308	0.635	0.477	3.10382623920403e-31	SynTI	Anxa2
Nectin2	1.44918370945598e-35	0.398824237710322	0.423	0.268	3.11762891415266e-31	SynTI	Nectin2
Slc7a8	1.51266874892968e-35	0.37182791589804	0.306	0.147	3.25420427957241e-31	SynTI	Slc7a8
Erc1	2.67189225893017e-35	0.316098055489481	0.774	0.667	5.74804181663647e-31	SynTI	Erc1
Cltc	3.47591181750338e-35	0.351690903418285	0.596	0.461	7.47772909299501e-31	SynTI	Cltc
Arhgef12	4.96540716637643e-35	0.27759360284217	0.827	0.72	1.06820804370256e-30	SynTI	Arhgef12
Smg6	5.1150059348678e-35	0.296681643462617	0.827	0.742	1.10039122676811e-30	SynTI	Smg6
Ggnbp2	5.75845819623681e-35	0.306600772165055	0.73	0.633	1.23881711175642e-30	SynTI	Ggnbp2
Mapkapk2	7.38884253869465e-35	0.385672360438288	0.399	0.238	1.58956169534938e-30	SynTI	Mapkapk2
Tra2a	1.20233244027677e-34	0.257419306517951	0.848	0.782	2.58657777876742e-30	SynTI	Tra2a
Pdlim1	1.2509619837168e-34	0.288153530580413	0.767	0.636	2.69119451556995e-30	SynTI	Pdlim1
Fig4	1.3704769245311e-34	0.407507939446724	0.278	0.134	2.94830700774375e-30	SynTI	Fig4
Papola	1.42309625418769e-34	0.308912431795728	0.749	0.661	3.06150697163397e-30	SynTI	Papola
Ube2r2	1.82284350941469e-34	0.331468828809307	0.721	0.604	3.92148324180382e-30	SynTI	Ube2r2
Napa	3.50353250147184e-34	0.373080635534824	0.334	0.179	7.53714947041636e-30	SynTI	Napa
Frs2	8.70689896676063e-34	0.272361596095905	0.719	0.588	1.87311517471921e-29	SynTI	Frs2
Myo6	9.39953163858183e-34	0.350123325147117	0.305	0.15	2.02212124140811e-29	SynTI	Myo6
Igf2bp2	1.53770979318765e-33	0.309989595956795	0.664	0.517	3.3080750780846e-29	SynTI	Igf2bp2
Hook2	1.84127466811963e-33	0.301530300618381	0.406	0.228	3.96113419352576e-29	SynTI	Hook2
Soga1	2.06880467994697e-33	0.36497193344358	0.261	0.118	4.45061950796992e-29	SynTI	Soga1
Lonp2	2.58747222690923e-33	0.297699200497323	0.788	0.718	5.56642900174982e-29	SynTI	Lonp2
Pja2	3.86997339882061e-33	0.357546025423598	0.502	0.35	8.32547377288278e-29	SynTI	Pja2
Sgce	5.1770516290434e-33	0.416269973057088	0.488	0.347	1.11373911695611e-28	SynTI	Sgce
Kdsr	6.37747536862132e-33	0.334242426509472	0.27	0.125	1.3719862760515e-28	SynTI	Kdsr
Epn21	8.44008964836681e-33	0.252074043463993	0.616	0.421	1.81571648605315e-28	SynTI	Epn2
Arfgap1	9.15205259103026e-33	0.384373173930212	0.412	0.265	1.96888107390834e-28	SynTI	Arfgap1
Ptpn12	1.2052414545332e-32	0.336366061135771	0.659	0.52	2.59283594113727e-28	SynTI	Ptpn12
Scarb2	1.33996488476182e-32	0.401274087639045	0.303	0.16	2.8826664565881e-28	SynTI	Scarb2
Limk2	1.60685301290267e-32	0.259752253761561	0.747	0.629	3.45682288665752e-28	SynTI	Limk2
Arfgef2	1.88840466956819e-32	0.364807985968033	0.568	0.444	4.06252496564204e-28	SynTI	Arfgef2
Ncoa7	2.88466362201296e-32	0.399769539071245	0.526	0.38	6.20577685003648e-28	SynTI	Ncoa7
Als2cl	3.24392710438856e-32	0.399545393666874	0.313	0.171	6.97866037967111e-28	SynTI	Als2cl
Rffl	3.46798032332572e-32	0.351674932041028	0.574	0.431	7.46066606957061e-28	SynTI	Rffl
Eefsec	4.08312519061029e-32	0.449752982681949	0.503	0.38	8.78402722255991e-28	SynTI	Eefsec
Aig1	5.09256778095775e-32	0.420809948998046	0.434	0.29	1.09556410671744e-27	SynTI	Aig1
Dennd4c	5.51319452893536e-32	0.32563854172079	0.624	0.497	1.18605353900986e-27	SynTI	Dennd4c
Olr1	6.2642448845853e-32	0.342388769586821	0.302	0.15	1.34762700202084e-27	SynTI	Olr1
Ssh1	9.96738773735746e-32	0.357453549047969	0.347	0.196	2.14428412393771e-27	SynTI	Ssh1
Khnyn	1.0736698458203e-31	0.362893286550708	0.535	0.402	2.30978593931321e-27	SynTI	Khnyn
A930015D03Rik	1.09537624446221e-31	0.373185484168339	0.351	0.203	2.35648291471156e-27	SynTI	A930015D03Rik
Coro7	1.44224690095159e-31	0.430542904847932	0.291	0.155	3.10270575801716e-27	SynTI	Coro7
Ppp1cb	1.63219610249348e-31	0.343910591328006	0.583	0.46	3.51134347529422e-27	SynTI	Ppp1cb
Tln1	2.43382923803223e-31	0.358971627442869	0.515	0.375	5.23589683977873e-27	SynTI	Tln1
Arap2	2.91929975651235e-31	0.360318588407865	0.584	0.459	6.28028956618501e-27	SynTI	Arap2
Irak1	2.91997174064886e-31	0.336567804740329	0.293	0.146	6.28173520565789e-27	SynTI	Irak1
Rdm1	1.74270925568854e-30	0.347578898725105	0.629	0.476	3.74909042176277e-26	SynTI	Rdm1
Wdr20	5.34506970158267e-30	0.346515005304443	0.545	0.421	1.14988484490148e-25	SynTI	Wdr20
Extl3	5.44704972325386e-30	0.45126535433669	0.319	0.187	1.1718238069636e-25	SynTI	Extl3
Rtn4	6.64338050952527e-30	0.299481564129298	0.583	0.441	1.42919044901417e-25	SynTI	Rtn4
Kpna6	7.04297531699424e-30	0.346207155316247	0.333	0.19	1.51515527994497e-25	SynTI	Kpna6
Lhfp	1.57455367511903e-29	0.431570325919577	0.445	0.304	3.38733732128358e-25	SynTI	Lhfp
Faf2	2.62128653912391e-29	0.337893725582062	0.532	0.397	5.63917373161727e-25	SynTI	Faf2
Snx30	3.12054168516256e-29	0.363534064253015	0.552	0.427	6.71322132729022e-25	SynTI	Snx30
Wsb1	3.22883907433134e-29	0.316158542579592	0.381	0.231	6.94620150060901e-25	SynTI	Wsb1
Ppm1b	3.38944522151728e-29	0.423278345747907	0.516	0.4	7.29171350505012e-25	SynTI	Ppm1b
Phlpp1	3.42160111878922e-29	0.266773117453372	0.65	0.508	7.36089048685125e-25	SynTI	Phlpp1
Maea	4.97137796935121e-29	0.330060452077392	0.483	0.338	1.06949254254653e-24	SynTI	Maea
Prkci	5.07446680470037e-29	0.310715858348213	0.436	0.293	1.09167004369519e-24	SynTI	Prkci
Itpr1	6.37622937668883e-29	0.330045546986123	0.469	0.327	1.37171822580707e-24	SynTI	Itpr1
Ltv1	6.93404342670924e-29	0.291189352369004	0.271	0.13	1.49172076238796e-24	SynTI	Ltv1
Psmd2	7.69181525805582e-29	0.350005871298376	0.272	0.139	1.65474021646555e-24	SynTI	Psmd2
Itgb5	1.09596955148224e-28	0.315485560222477	0.379	0.227	2.35775929610373e-24	SynTI	Itgb5
Pard3b	1.16674935584267e-28	0.36603405627783	0.455	0.303	2.51002788922434e-24	SynTI	Pard3b
Nbeal1	1.42499271094201e-28	0.283448672353111	0.555	0.412	3.06558681904954e-24	SynTI	Nbeal1
Npepps	1.68494679605263e-28	0.272841180617611	0.642	0.512	3.62482604234802e-24	SynTI	Npepps
Ap3s1	1.97946892364068e-28	0.355514682481505	0.385	0.247	4.25843149542818e-24	SynTI	Ap3s1
Txlna	2.06079005054076e-28	0.354357980711174	0.356	0.217	4.43337763572833e-24	SynTI	Txlna
Tmc4	2.62857282784118e-28	0.345989311935957	0.372	0.231	5.65484872453473e-24	SynTI	Tmc4
Bag6	5.38248670393769e-28	0.366114320336511	0.272	0.143	1.15793436461811e-23	SynTI	Bag6
Sf3b2	6.23525216550231e-28	0.342138385199627	0.387	0.248	1.34138979836451e-23	SynTI	Sf3b2
Brap	2.02824312504914e-27	0.328775961015296	0.357	0.216	4.36335943491822e-23	SynTI	Brap
Hprt	3.58756097116705e-27	0.294805433138841	0.301	0.162	7.71791991727168e-23	SynTI	Hprt
Itsn2	6.87141425307371e-27	0.316472804207905	0.611	0.505	1.47824734826375e-22	SynTI	Itsn2
Mxd4	1.05518112323822e-26	0.329085926966833	0.305	0.174	2.27001115042239e-22	SynTI	Mxd4
Smtn	1.10469697796723e-26	0.352797145852093	0.41	0.283	2.37653460870089e-22	SynTI	Smtn
Mov10	1.16060502884e-26	0.352780153115068	0.433	0.3	2.49680959854349e-22	SynTI	Mov10
Lpar11	1.24486033523348e-26	0.257067866346732	0.379	0.218	2.67806803918779e-22	SynTI	Lpar1
Syne2	1.3547502714152e-26	0.420478289985681	0.281	0.157	2.91447425889553e-22	SynTI	Syne2
Pphln1	1.49981813346906e-26	0.434084455574814	0.375	0.254	3.22655875053199e-22	SynTI	Pphln1
Uevld	1.74404453411733e-26	0.318123492864395	0.484	0.351	3.75196300624662e-22	SynTI	Uevld
Zfp609	1.82226899680022e-26	0.273670052670785	0.66	0.557	3.92024729281631e-22	SynTI	Zfp609
Fam214a	2.48741526110426e-26	0.288657667796408	0.61	0.455	5.3511764512136e-22	SynTI	Fam214a
Polr2a	2.48935944971014e-26	0.335806686281276	0.536	0.42	5.35535898416142e-22	SynTI	Polr2a
Pdxdc1	2.64786512288368e-26	0.312544137422404	0.519	0.397	5.69635223885967e-22	SynTI	Pdxdc1
Pxmp4	1.22830702256007e-25	0.361863129222061	0.275	0.154	2.64245689763348e-21	SynTI	Pxmp4
Camsap2	1.27699926557823e-25	0.353980538460055	0.376	0.248	2.74720852003844e-21	SynTI	Camsap2
Eci2	1.33318727956522e-25	0.371035408139499	0.303	0.182	2.86808579452866e-21	SynTI	Eci2
Dnmt1	1.58487746713062e-25	0.33480115232997	0.332	0.199	3.40954689503811e-21	SynTI	Dnmt1
Map3k7	1.80893924815675e-25	0.335950696321036	0.399	0.27	3.89157100455961e-21	SynTI	Map3k7
Atg4c	4.31367463898149e-25	0.360562790536817	0.376	0.251	9.28000825084087e-21	SynTI	Atg4c
Ube2e1	6.18218040706459e-25	0.365984157428693	0.471	0.352	1.3299724709718e-20	SynTI	Ube2e1
Mau2	6.35675950326311e-25	0.324887332057913	0.494	0.377	1.36752967193699e-20	SynTI	Mau2
Cdk11b	7.21698281417721e-25	0.295546807881994	0.553	0.432	1.55258951281394e-20	SynTI	Cdk11b
Tnfrsf21	7.82893566911878e-25	0.348993336534353	0.287	0.167	1.68423893049752e-20	SynTI	Tnfrsf21
Kcnk5	8.96119971199353e-25	0.322725703993383	0.275	0.151	1.92782289404117e-20	SynTI	Kcnk5
Usp12	9.09859163818993e-25	0.331366500342124	0.46	0.334	1.9573800191238e-20	SynTI	Usp12
Hp1bp3	1.09084026999543e-24	0.306382719793915	0.418	0.287	2.34672467284118e-20	SynTI	Hp1bp3
Gpatch1	1.37741832020155e-24	0.313531829053994	0.317	0.191	2.96324003224959e-20	SynTI	Gpatch1
Mob1b	4.10293368267846e-24	0.303605842578641	0.263	0.142	8.82664123154616e-20	SynTI	Mob1b
Ankrd13c	4.37582652181321e-24	0.311638572833271	0.539	0.423	9.41371559637676e-20	SynTI	Ankrd13c
Mob3c	7.47695135603764e-24	0.312537341184511	0.268	0.151	1.60851654522438e-19	SynTI	Mob3c
Gbf1	7.50089486402042e-24	0.25997533290705	0.679	0.581	1.61366751209671e-19	SynTI	Gbf1
Cnnm2	7.91166290556352e-24	0.320630163102866	0.281	0.157	1.70203604087388e-19	SynTI	Cnnm2
Nmnat3	7.93846405507859e-24	0.380449516124138	0.305	0.186	1.70780177216906e-19	SynTI	Nmnat3
Stx8	1.65259568865248e-23	0.291012566473421	0.682	0.579	3.55522910499807e-19	SynTI	Stx8
Trim25	1.83479373309572e-23	0.307652266728142	0.508	0.396	3.94719175800882e-19	SynTI	Trim25
Fgfr1	2.22123533648962e-23	0.312386501507966	0.417	0.288	4.77854357939012e-19	SynTI	Fgfr1
Cbx7	4.39626752145324e-23	0.254537673081511	0.876	0.844	9.45769031890235e-19	SynTI	Cbx7
Atg10	5.63128240216179e-23	0.322718187925767	0.365	0.24	1.21145778317707e-18	SynTI	Atg10
Cabin1	1.02081548842835e-22	0.329130709881371	0.44	0.324	2.19608036025591e-18	SynTI	Cabin1
Stat2	1.02806317552919e-22	0.356550617031468	0.337	0.219	2.21167230951595e-18	SynTI	Stat2
Clint1	1.04185874261537e-22	0.263697897795313	0.686	0.605	2.24135071298844e-18	SynTI	Clint1
Kmt5a	1.08058708481927e-22	0.296570130190161	0.481	0.356	2.32466699557169e-18	SynTI	Kmt5a
Appl2	1.13604692372233e-22	0.309511810025086	0.271	0.155	2.44397774700385e-18	SynTI	Appl2
Lasp1	1.82286565319232e-22	0.304347357474882	0.539	0.428	3.92153087971265e-18	SynTI	Lasp1
Flii	1.87384150372796e-22	0.281064364991462	0.298	0.174	4.03119522696996e-18	SynTI	Flii
Snx24	2.24917345239977e-22	0.280231837317614	0.582	0.453	4.83864684814763e-18	SynTI	Snx24
Atp6v1b2	2.81678180773348e-22	0.275120324463185	0.388	0.258	6.05974270297704e-18	SynTI	Atp6v1b2
Epc1	3.56932513752837e-22	0.294374585705923	0.478	0.362	7.67868916836479e-18	SynTI	Epc1
Ankrd13a	5.44692183333198e-22	0.258832304739683	0.647	0.529	1.17179629400471e-17	SynTI	Ankrd13a
Lemd3	6.11416674603846e-22	0.324527834357686	0.374	0.258	1.31534069207525e-17	SynTI	Lemd3
Hivep2	6.87445376086532e-22	0.322075530467303	0.597	0.495	1.47890123757496e-17	SynTI	Hivep2
Mtmr4	7.31541390107757e-22	0.286401004758618	0.361	0.243	1.57376499253882e-17	SynTI	Mtmr4
Anapc2	9.36078868121416e-22	0.298704755280767	0.292	0.179	2.0137864689896e-17	SynTI	Anapc2
Cnst	1.20028049718719e-21	0.278174389282864	0.274	0.157	2.58216343359881e-17	SynTI	Cnst
Gskip	1.20743755204789e-21	0.295635099174356	0.279	0.163	2.59756040572063e-17	SynTI	Gskip
Msh3	2.00342285716588e-21	0.311471042821997	0.274	0.161	4.30996359262096e-17	SynTI	Msh3
Kidins220	2.04698689426856e-21	0.254483433845444	0.504	0.374	4.40368290563995e-17	SynTI	Kidins220
Synj1	3.8649658633167e-21	0.312388450215514	0.368	0.254	8.31470106175322e-17	SynTI	Synj1
Ip6k2	4.38116283331192e-21	0.29991016945967	0.281	0.17	9.42519560330394e-17	SynTI	Ip6k2
Acadm	5.27068939218037e-21	0.270351736823027	0.421	0.294	1.13388340893976e-16	SynTI	Acadm
Sgsm2	5.39949712172296e-21	0.287445205738177	0.325	0.204	1.16159381579626e-16	SynTI	Sgsm2
Araf	8.08176592329095e-21	0.294943192788875	0.406	0.286	1.73863030307758e-16	SynTI	Araf
Sh3rf1	9.7460606545697e-21	0.289909746966541	0.375	0.247	2.09667002861758e-16	SynTI	Sh3rf1
Zswim8	1.09669157320611e-20	0.29789457944162	0.543	0.437	2.35931258143831e-16	SynTI	Zswim8
Pde4d	1.20908975649874e-20	0.4188551335554	0.705	0.652	2.60111479315574e-16	SynTI	Pde4d
Terf2	2.05160156527166e-20	0.303984374045436	0.439	0.332	4.41361044736893e-16	SynTI	Terf2
Smurf2	3.63182492503578e-20	0.29185118469138	0.608	0.526	7.81314496122948e-16	SynTI	Smurf2
Myl12b	4.135163219366e-20	0.284229464495403	0.29	0.18	8.89597663382207e-16	SynTI	Myl12b
Eif2s3y	5.13878353239738e-20	0.335362112155328	0.259	0.152	1.10550650132465e-15	SynTI	Eif2s3y
Snap23	2.41493778987563e-19	0.265665116908625	0.355	0.241	5.19525566735944e-15	SynTI	Snap23
Ddx39b	3.05389857130291e-19	0.279985243733041	0.415	0.302	6.56985199644395e-15	SynTI	Ddx39b
Phrf1	3.48994195002366e-19	0.281178142117835	0.565	0.477	7.50791211708591e-15	SynTI	Phrf1
Ube4b	3.52772214288771e-19	0.259916351847565	0.613	0.522	7.58918864599434e-15	SynTI	Ube4b
Hadh	4.05007144230369e-19	0.329168209063876	0.285	0.185	8.71291869382793e-15	SynTI	Hadh
Spint2	4.71911527118475e-19	0.253894860251984	0.361	0.242	1.01522326828998e-14	SynTI	Spint2
Gm26745	5.93576539735258e-19	0.266828245974063	0.305	0.198	1.27696120993246e-14	SynTI	Gm26745
Snx6	7.64573736841329e-19	0.303270998685019	0.443	0.346	1.64482748006675e-14	SynTI	Snx6
Dpy19l4	8.65821212623348e-19	0.276702339926224	0.275	0.168	1.86264117471661e-14	SynTI	Dpy19l4
St3gal6	1.06075675260362e-18	0.286405271170368	0.379	0.267	2.28200600187617e-14	SynTI	St3gal6
Atg7	1.40906654714461e-18	0.296761106274458	0.382	0.272	3.0313248628722e-14	SynTI	Atg7
Ube2w	1.77640429017232e-18	0.273717476739412	0.264	0.162	3.82157854944771e-14	SynTI	Ube2w
Ddhd2	1.78298624208779e-18	0.277744156787405	0.577	0.503	3.83573830260347e-14	SynTI	Ddhd2
Zbtb10	1.83727216597933e-18	0.255231521050572	0.521	0.424	3.95252361067133e-14	SynTI	Zbtb10
Adar	2.16420995928062e-18	0.259681393906568	0.3	0.191	4.6558648854004e-14	SynTI	Adar
Tsc22d1	2.43043366379984e-18	0.263234532445914	0.547	0.445	5.22859194093261e-14	SynTI	Tsc22d1
Taz	2.820512903523e-18	0.266997551317831	0.323	0.214	6.06776940934903e-14	SynTI	Taz
Ttc13	2.88093189015772e-18	0.271047858894509	0.278	0.175	6.1977487752963e-14	SynTI	Ttc13
Zfp568	3.94861286094049e-18	0.251429064395354	0.593	0.511	8.49465084774128e-14	SynTI	Zfp568
Psg23	8.0773275137564e-18	0.278840133660339	0.35	0.235	1.73767546803442e-13	SynTI	Psg23
Nrbp1	3.91722356831503e-17	0.282394789082074	0.347	0.244	8.42712306251612e-13	SynTI	Nrbp1
Rnf220	5.70850466895611e-17	0.328107923367363	0.318	0.222	1.22807060943253e-12	SynTI	Rnf220
Bahd1	8.63117356395416e-17	0.264211459496213	0.278	0.182	1.85682436881346e-12	SynTI	Bahd1
Dera	8.63158507412076e-17	0.290418498323936	0.317	0.219	1.8569128969956e-12	SynTI	Dera
Afg1l	1.8495020450774e-16	0.291511098115367	0.32	0.223	3.978833749575e-12	SynTI	Afg1l
Eipr1	2.1985269847892e-16	0.376246804197549	0.423	0.34	4.729691102377e-12	SynTI	Eipr1
Dap	3.00645170041246e-16	0.315583459364359	0.364	0.271	6.46777954309733e-12	SynTI	Dap
Anapc4	8.74085012164062e-16	0.259501206007754	0.305	0.209	1.88041908666855e-11	SynTI	Anapc4
Thada	1.98401682425554e-15	0.260652079347678	0.489	0.392	4.26821539402094e-11	SynTI	Thada
Rsf1	4.45139614818686e-15	0.25649159603431	0.426	0.332	9.57628853359438e-11	SynTI	Rsf1
Fam117a	4.51562393125253e-15	0.256953176719208	0.359	0.263	9.71446176330357e-11	SynTI	Fam117a
Plekhm2	6.19350324039043e-15	0.267488864570728	0.466	0.384	1.33240835210519e-10	SynTI	Plekhm2
Gm38399	6.28033597566359e-15	0.287590373940566	0.271	0.179	1.35108867844451e-10	SynTI	Gm38399
9030624J02Rik	6.41458041139684e-15	0.256014477987493	0.401	0.31	1.3799686839038e-10	SynTI	9030624J02Rik
Snx3	2.89105532266339e-14	0.266623742085959	0.532	0.465	6.21952731564574e-10	SynTI	Snx3
Xpr1	9.11808369867303e-14	0.260731607704397	0.267	0.183	1.96157334609553e-09	SynTI	Xpr1
Dsg2	1.49211364395669e-13	0.257693509165297	0.406	0.322	3.20998408224403e-09	SynTI	Dsg2
Tmem65	1.74455125234859e-13	0.260228337183894	0.276	0.191	3.75305310917753e-09	SynTI	Tmem65
Eif2s2	2.04683558632731e-13	0.252060127795432	0.404	0.319	4.40335739686594e-09	SynTI	Eif2s2
Trim26	4.98672543315245e-13	0.253217000645874	0.339	0.255	1.07279424243409e-08	SynTI	Trim26
March8	1.04223227888946e-12	0.255737335866258	0.34	0.258	2.2421543015749e-08	SynTI	March8
Pcsk7	1.58324540576887e-12	0.251669025234876	0.437	0.362	3.40603584143056e-08	SynTI	Pcsk7
Sil1	5.56548104169766e-12	0.254142704103171	0.32	0.24	1.19730193650042e-07	SynTI	Sil1
Pde10a	0	2.47210500548598	0.943	0.168	0	S-TGC	Pde10a
Tnfaip8	0	2.22699597502076	0.897	0.188	0	S-TGC	Tnfaip8
Apba1	0	2.21554624079748	0.886	0.066	0	S-TGC	Apba1
Chd7	0	2.15724258617872	0.958	0.182	0	S-TGC	Chd7
St3gal4	0	2.13230019285632	0.981	0.281	0	S-TGC	St3gal4
1700025G04Rik	0	2.12274350722398	0.997	0.609	0	S-TGC	1700025G04Rik
Prkch	0	2.05629987032534	0.994	0.384	0	S-TGC	Prkch
Lepr	0	2.03591562930428	0.787	0.241	0	S-TGC	Lepr
Dock5	0	2.00360851371827	0.994	0.38	0	S-TGC	Dock5
Nos1ap	0	1.97811713737665	0.975	0.319	0	S-TGC	Nos1ap
Homer2	0	1.95287938695677	0.919	0.086	0	S-TGC	Homer2
Zfp423	0	1.93244137757071	0.89	0.12	0	S-TGC	Zfp423
Cdh23	0	1.85625968425365	0.71	0.061	0	S-TGC	Cdh23
Magi3	0	1.84592234027669	0.984	0.405	0	S-TGC	Magi3
Csgalnact1	0	1.81962232996267	0.875	0.115	0	S-TGC	Csgalnact1
Fnd3c2	0	1.81905403368682	0.738	0.132	0	S-TGC	Fnd3c2
Entpd1	0	1.79956266365392	0.886	0.108	0	S-TGC	Entpd1
Plcb4	0	1.76608832738665	0.989	0.303	0	S-TGC	Plcb4
Adcy7	0	1.76387514387006	0.928	0.162	0	S-TGC	Adcy7
Adgrg6	0	1.69937610551188	0.946	0.26	0	S-TGC	Adgrg6
Adgrl2	0	1.69347635579955	0.946	0.259	0	S-TGC	Adgrl2
2900026A02Rik	0	1.66222848901049	0.884	0.107	0	S-TGC	2900026A02Rik
Chn2	0	1.65176599033293	0.737	0.054	0	S-TGC	Chn2
Diaph2	0	1.64978903587334	0.98	0.574	0	S-TGC	Diaph2
Ntn1	0	1.64709499953353	0.759	0.064	0	S-TGC	Ntn1
Snx10	0	1.63577084279642	0.85	0.078	0	S-TGC	Snx10
Ccnjl	0	1.63168748200012	0.745	0.046	0	S-TGC	Ccnjl
Tanc1	0	1.61266975986519	0.969	0.375	0	S-TGC	Tanc1
Sema3e	0	1.57678161778546	0.907	0.288	0	S-TGC	Sema3e
Setbp1	0	1.57452972873615	0.831	0.189	0	S-TGC	Setbp1
Spred2	0	1.5683886571675	0.85	0.18	0	S-TGC	Spred2
Adgrf5	0	1.56668099500359	0.934	0.241	0	S-TGC	Adgrf5
Mgll	0	1.56447854183284	0.932	0.262	0	S-TGC	Mgll
Psd3	0	1.56290828801147	0.904	0.293	0	S-TGC	Psd3
Tox2	0	1.56213352650223	0.708	0.024	0	S-TGC	Tox2
Ext1	0	1.56202167407313	0.997	0.82	0	S-TGC	Ext1
Pik3r1	0	1.53374713970962	0.793	0.107	0	S-TGC	Pik3r1
Arhgap28	0	1.53278200750961	0.966	0.431	0	S-TGC	Arhgap28
Fbxo21	0	1.5316755517072	0.792	0.101	0	S-TGC	Fbxo21
Mfhas1	0	1.53089747086349	0.798	0.107	0	S-TGC	Mfhas1
Podxl	0	1.52905573100372	0.814	0.058	0	S-TGC	Podxl
Adgra3	0	1.50408455537547	0.799	0.086	0	S-TGC	Adgra3
Cobll11	0	1.48059950250872	0.967	0.37	0	S-TGC	Cobll1
Fam168a	0	1.45694174477418	0.983	0.459	0	S-TGC	Fam168a
Ccser1	0	1.44581142283597	0.989	0.7	0	S-TGC	Ccser1
Foxp4	0	1.42858673921264	0.79	0.094	0	S-TGC	Foxp4
Fnbp1	0	1.41992502334206	0.885	0.257	0	S-TGC	Fnbp1
Efr3b	0	1.41784135523161	0.646	0.053	0	S-TGC	Efr3b
Fam171a1	0	1.41317890975034	0.836	0.146	0	S-TGC	Fam171a1
App	0	1.40886113137527	0.961	0.601	0	S-TGC	App
Herc4	0	1.40632117148845	0.939	0.384	0	S-TGC	Herc4
Bach2	0	1.3933904382239	0.712	0.119	0	S-TGC	Bach2
Dst	0	1.389438771755	0.999	0.878	0	S-TGC	Dst
Klhl13	0	1.38602021668849	0.967	0.48	0	S-TGC	Klhl13
Arhgap18	0	1.38212957630076	0.938	0.385	0	S-TGC	Arhgap18
Pitpnm21	0	1.36911586382588	0.842	0.183	0	S-TGC	Pitpnm2
Igf2bp1	0	1.35009711748872	0.903	0.246	0	S-TGC	Igf2bp1
Fkbp5	0	1.34952378239919	0.762	0.11	0	S-TGC	Fkbp5
Inf2	0	1.3398820707113	0.747	0.157	0	S-TGC	Inf2
Lifr	0	1.33768776928417	0.899	0.279	0	S-TGC	Lifr
Rcor1	0	1.32311542887999	0.945	0.445	0	S-TGC	Rcor1
Gab2	0	1.30900043873333	0.991	0.687	0	S-TGC	Gab2
Tcf12	0	1.3033442272151	0.988	0.686	0	S-TGC	Tcf12
Pawr	0	1.30272640102747	0.925	0.436	0	S-TGC	Pawr
Alpl	0	1.28934899951765	0.738	0.123	0	S-TGC	Alpl
Epb41l1	0	1.2867918486219	0.795	0.163	0	S-TGC	Epb41l1
AC118475.1	0	1.28676274408489	0.553	0.033	0	S-TGC	AC118475.1
Brd3	0	1.27647229820325	0.878	0.245	0	S-TGC	Brd3
Ube2o	0	1.27245149517784	0.895	0.288	0	S-TGC	Ube2o
Cecr2	0	1.26986279640103	0.753	0.128	0	S-TGC	Cecr2
Kit	0	1.24951996116279	0.724	0.095	0	S-TGC	Kit
Mtcl1	0	1.2425121411237	0.504	0.036	0	S-TGC	Mtcl1
Arhgef25	0	1.23906860977844	0.626	0.047	0	S-TGC	Arhgef25
Farp11	0	1.23376461461789	0.964	0.4	0	S-TGC	Farp1
Mkl2	0	1.22508981559123	0.913	0.326	0	S-TGC	Mkl2
Nup62cl	0	1.21871989610625	0.841	0.231	0	S-TGC	Nup62cl
Fhl2	0	1.20974153512039	0.682	0.081	0	S-TGC	Fhl2
Rbms1	0	1.18240438401734	1	0.938	0	S-TGC	Rbms1
Mical2	0	1.17577213206777	0.734	0.102	0	S-TGC	Mical2
N4bp2	0	1.16901761689737	0.93	0.358	0	S-TGC	N4bp2
Rnf157	0	1.14219970146719	0.639	0.08	0	S-TGC	Rnf157
Slc6a2	0	1.11139649223961	0.596	0.037	0	S-TGC	Slc6a2
Dock9	0	1.03943784824456	0.992	0.738	0	S-TGC	Dock9
Phldb1	0	0.974779464331838	0.555	0.045	0	S-TGC	Phldb1
Mfsd2a	0	0.870429339436606	0.488	0.023	0	S-TGC	Mfsd2a
Chst9	1.1541183082329e-306	1.42024947836555	0.524	0.05	2.48285471650143e-302	S-TGC	Chst9
Ctdspl1	4.66659425781085e-304	1.15353410760085	0.994	0.662	1.00392442268285e-299	S-TGC	Ctdspl
Ghrh	5.45711133815584e-304	0.93630019188433	0.424	0.017	1.17398836217747e-299	S-TGC	Ghrh
Znrf1	3.25463482298648e-303	1.18567432161767	0.784	0.191	7.0016958946908e-299	S-TGC	Znrf1
Sdc1	9.4410811675228e-303	0.836354898454881	0.469	0.029	2.03105979156918e-298	S-TGC	Sdc1
Dock7	1.1419036041317e-300	1.17758505875272	0.917	0.392	2.45657722356852e-296	S-TGC	Dock7
Atp2b11	1.72261071680187e-299	1.18960021097141	0.922	0.359	3.70585243505587e-295	S-TGC	Atp2b1
Hsd17b2	1.97290485530971e-298	1.33951046341731	0.722	0.156	4.24431021522778e-294	S-TGC	Hsd17b2
Cdc42bpa	1.24112808243621e-295	1.17588938226447	0.85	0.266	2.67003884374501e-291	S-TGC	Cdc42bpa
Map1b	3.0289145046196e-295	1.42859282841128	0.911	0.427	6.51610377378814e-291	S-TGC	Map1b
Tmem108	5.70331025792315e-295	2.25862330491305	0.661	0.139	1.22695313578701e-290	S-TGC	Tmem108
Plpp1	1.97810636198716e-293	1.17923286730944	0.887	0.325	4.25550021654298e-289	S-TGC	Plpp1
Eef2k	1.65649822178719e-292	1.04138857546747	0.684	0.124	3.56362462453078e-288	S-TGC	Eef2k
Tmc5	6.76187400618271e-291	1.01371199283945	0.56	0.065	1.45468195495009e-286	S-TGC	Tmc5
Sipa1l11	4.71499171475511e-289	1.10462116671288	0.959	0.423	1.01433616759527e-284	S-TGC	Sipa1l1
Tsc22d3	3.8664545877354e-288	1.54163540675221	0.723	0.191	8.31790375459517e-284	S-TGC	Tsc22d3
Klf13	5.71599862620805e-288	1.16764279185908	0.902	0.356	1.22968278445614e-283	S-TGC	Klf13
Cdh5	5.83094388551539e-288	1.04736892272862	0.675	0.12	1.25441095809093e-283	S-TGC	Cdh5
Unc5b	1.85111392754246e-286	0.963431400602775	0.651	0.103	3.9823013923221e-282	S-TGC	Unc5b
Slc7a1	6.49736403610698e-281	1.26982153337057	0.934	0.505	1.39777792508769e-276	S-TGC	Slc7a1
Fyn	3.87613849257366e-279	1.15369983735571	0.795	0.23	8.33873673907372e-275	S-TGC	Fyn
Dock8	1.10891542510059e-278	1.15131216235176	0.902	0.359	2.38560975401889e-274	S-TGC	Dock8
Notch2	1.55404176523236e-278	1.05579343877852	0.729	0.161	3.34321004954438e-274	S-TGC	Notch2
Shroom4	7.82358663319012e-277	1.33211700843114	0.961	0.661	1.68308819239819e-272	S-TGC	Shroom4
Ctif	7.99104678957379e-277	1.4241540951269	0.68	0.152	1.71911389584101e-272	S-TGC	Ctif
Pik3cd	8.32087076601731e-277	0.818187596176342	0.403	0.019	1.7900689278933e-272	S-TGC	Pik3cd
Sms	4.3922994247349e-271	0.85189229898522	0.509	0.053	9.44915375243219e-267	S-TGC	Sms
Vav21	7.93621751010976e-271	1.05732384964633	0.776	0.195	1.70731847294991e-266	S-TGC	Vav2
Hectd4	5.60511409488475e-269	1.06665335710032	0.841	0.28	1.20582819523256e-264	S-TGC	Hectd4
Myo10	2.35950565039432e-266	1.03821655119715	0.961	0.591	5.07600450569331e-262	S-TGC	Myo10
Rhbdf2	5.45013583718730e-265	0.828239104224977	0.423	0.028	1.1724877226541e-260	S-TGC	Rhbdf2
Hs3st1	3.66365770393429e-264	0.866357740324778	0.505	0.055	7.88162681847385e-260	S-TGC	Hs3st1
Fam83d	9.194421952941e-264	0.730568750877113	0.389	0.018	1.9779959947362e-259	S-TGC	Fam83d
Fgd6	8.76111568626076e-263	1.02214797692285	0.772	0.203	1.88477881758528e-258	S-TGC	Fgd6
Nostrin	2.04281891234669e-262	0.997979215997347	0.633	0.114	4.39471632613144e-258	S-TGC	Nostrin
Rasal1	1.05059854855343e-261	0.803748923832667	0.419	0.027	2.260152657503e-257	S-TGC	Rasal1
Dgkd	1.51490765837657e-259	1.05203566411597	0.743	0.19	3.25902084546551e-255	S-TGC	Dgkd
Prdm6	3.45559098234856e-259	0.884331472761486	0.457	0.041	7.43401288032645e-255	S-TGC	Prdm6
Prex1	2.56239366218e-258	0.967902752913489	0.608	0.104	5.51247748544783e-254	S-TGC	Prex1
Tnfaip2	6.70981568297172e-257	0.764914620528985	0.453	0.039	1.44348264787771e-252	S-TGC	Tnfaip2
Dtx3	1.32677189669637e-256	0.810158899688355	0.408	0.027	2.85428438136289e-252	S-TGC	Dtx3
Pde4dip	5.65919177654665e-256	1.11459310129029	0.799	0.261	1.21746192688848e-251	S-TGC	Pde4dip
Simc1	5.38141533229913e-254	0.994257852262904	0.59	0.1	1.15770388043751e-249	S-TGC	Simc1
Chsy1	1.21414331300291e-253	1.06020305182587	0.564	0.087	2.61198650926317e-249	S-TGC	Chsy1
Micall1	1.45937685211529e-253	0.88242797530289	0.608	0.102	3.13955742195561e-249	S-TGC	Micall1
Arhgap22	5.58778526471543e-253	0.942915859854583	0.629	0.113	1.20210024399823e-248	S-TGC	Arhgap22
Bend6	8.27443623808921e-253	0.914358227050887	0.49	0.055	1.78007946790013e-248	S-TGC	Bend6
Nucb2	8.56883935476432e-253	0.71706410005624	0.419	0.03	1.84341441039045e-248	S-TGC	Nucb2
Fn1	1.31658110238458e-251	0.958764089565567	0.97	0.665	2.83236092555994e-247	S-TGC	Fn1
Tspan14	1.89599543060849e-251	1.04073080214078	0.801	0.261	4.07885496986804e-247	S-TGC	Tspan14
Bmp1	1.62488814392167e-248	0.830960931286264	0.474	0.05	3.4956218640187e-244	S-TGC	Bmp1
Pik3c2a	1.98354636802774e-245	1.03409057361273	0.876	0.374	4.26720330153808e-241	S-TGC	Pik3c2a
Fdxr	1.50796536552258e-244	0.799949274078825	0.525	0.068	3.24408589084873e-240	S-TGC	Fdxr
Pdgfrb	1.60262667868828e-244	0.728573843793398	0.384	0.023	3.44773077386209e-240	S-TGC	Pdgfrb
Rnpep	4.68252912158238e-244	0.803639985975421	0.503	0.063	1.00735248992602e-239	S-TGC	Rnpep
Dnmt3a	3.61873177944129e-243	0.987791884874624	0.958	0.556	7.78497767711205e-239	S-TGC	Dnmt3a
Ptpn3	2.00873880303678e-241	1.02446318410435	0.864	0.322	4.32139978697302e-237	S-TGC	Ptpn3
Grhl21	5.43690219157222e-241	0.902122462065845	0.6	0.104	1.16964076847293e-236	S-TGC	Grhl2
Liph	1.28408192603004e-240	0.892572685698537	0.6	0.108	2.76244544746842e-236	S-TGC	Liph
Vstm4	2.65229325285789e-240	0.859670747859103	0.522	0.072	5.70587847487319e-236	S-TGC	Vstm4
Insc	4.73156259953101e-236	0.767537552319947	0.35	0.017	1.01790106203711e-231	S-TGC	Insc
Lnpep	1.33535358748033e-235	1.09173544031353	0.846	0.366	2.87274617274643e-231	S-TGC	Lnpep
Capn15	1.46162527180293e-235	0.99553763883715	0.823	0.303	3.14439444722964e-231	S-TGC	Capn15
Tjp2	2.34624703613818e-234	1.0082476786146	0.83	0.296	5.04748124884406e-230	S-TGC	Tjp2
Wasf1	6.15112957693359e-234	0.676055193852969	0.354	0.018	1.32329250588572e-229	S-TGC	Wasf1
Prkce	6.56804988819022e-232	0.976758699811814	0.988	0.786	1.41298457244636e-227	S-TGC	Prkce
Gng12	5.92258973281829e-228	0.813785129927384	0.98	0.795	1.2741267292212e-223	S-TGC	Gng12
Sfmbt2	1.93406439722743e-227	0.742809164374898	0.995	0.898	4.16075273775536e-223	S-TGC	Sfmbt2
Rps6ka6	6.14790616130391e-227	1.11328867929162	0.71	0.202	1.32259905248131e-222	S-TGC	Rps6ka6
Mum1l1	1.68638491756332e-226	0.8507917922407	0.464	0.057	3.62791987315397e-222	S-TGC	Mum1l1
Cdh24	2.40557381788183e-225	0.87175411734451	0.519	0.081	5.17511095440918e-221	S-TGC	Cdh24
Adarb1	6.63550740503779e-225	0.923921416210631	0.498	0.073	1.42749670804578e-220	S-TGC	Adarb1
Cdk19	2.22563057810236e-224	1.11852467979961	0.746	0.244	4.78799906267161e-220	S-TGC	Cdk19
Ptp4a2	3.15576304034833e-222	0.935465310272227	0.885	0.412	6.78899302870135e-218	S-TGC	Ptp4a2
Pparg	7.60650092489129e-222	1.00998586343752	0.972	0.766	1.63638654397186e-217	S-TGC	Pparg
Fbxl17	6.30772934627368e-219	0.979034661841033	0.936	0.612	1.35698181426386e-214	S-TGC	Fbxl17
Tcf4	1.11098324198762e-218	0.985261912311884	0.944	0.574	2.39005824848797e-214	S-TGC	Tcf4
Heg1	1.66502053217783e-217	0.858810882264617	0.605	0.121	3.58195867087416e-213	S-TGC	Heg1
Tln2	4.18398233368004e-217	0.887322235736038	0.642	0.147	9.00100119444586e-213	S-TGC	Tln2
Ammecr1	8.40235925235312e-217	0.962661217904555	0.548	0.102	1.80759954595873e-212	S-TGC	Ammecr1
Rgs17	1.05109857484168e-216	1.12642841925025	0.639	0.162	2.26122836405691e-212	S-TGC	Rgs17
Gnas	5.28254095645892e-216	0.959766891972065	0.909	0.48	1.13643303596301e-211	S-TGC	Gnas
Ppp2r2c	9.35428159009933e-216	1.02208318750662	0.524	0.091	2.01238659847807e-211	S-TGC	Ppp2r2c
Palm	4.33635657770564e-215	0.85201253724097	0.616	0.133	9.32880390561815e-211	S-TGC	Palm
Filip1l	5.71769248822135e-214	0.765411839276613	0.48	0.067	1.23004718499106e-209	S-TGC	Filip1l
Fut8	3.20356629031056e-213	0.974103752521668	0.869	0.411	6.8918321603451e-209	S-TGC	Fut8
Mical3	4.52397944751556e-209	1.13657217401179	0.929	0.681	9.73243698544023e-205	S-TGC	Mical3
Map7d1	1.22397442263949e-207	0.781975160065523	0.511	0.085	2.63313617542434e-203	S-TGC	Map7d1
Maml3	1.64963060957402e-207	0.775617454988244	0.994	0.916	3.54885033037658e-203	S-TGC	Maml3
Oaf	4.91555658813353e-207	0.796592454987166	0.615	0.135	1.05748368880517e-202	S-TGC	Oaf
Mgat5	2.57639852714086e-205	1.02635760925465	0.917	0.577	5.54260615143814e-201	S-TGC	Mgat5
Tmem266	1.35453685695016e-204	0.705276061563574	0.3	0.014	2.91401514035687e-200	S-TGC	Tmem266
Arhgap8	3.28215697272823e-204	0.82692852161839	0.596	0.128	7.06090429543023e-200	S-TGC	Arhgap8
Epas1	3.6512084039021e-204	0.932470289969656	0.918	0.534	7.85484463931458e-200	S-TGC	Epas1
Zmat1	3.64042944727686e-203	0.70785959683979	0.338	0.023	7.83165586992672e-199	S-TGC	Zmat1
Pik3c2b	4.22977833457005e-203	0.744008506367942	0.459	0.065	9.09952213116054e-199	S-TGC	Pik3c2b
Med13l	6.42449558286172e-203	0.979233802670228	0.84	0.381	1.38210173474104e-198	S-TGC	Med13l
Clic4	1.53162292647394e-200	0.89774423286388	0.899	0.467	3.29498040172339e-196	S-TGC	Clic4
Slc45a4	6.75640545573455e-200	1.01345642378571	0.793	0.332	1.45350550569217e-195	S-TGC	Slc45a4
Elk3	3.0351334265681e-198	0.70478148537034	0.45	0.063	6.52948254057596e-194	S-TGC	Elk3
Ube2e3	4.40400713980995e-197	0.814885430144578	0.604	0.139	9.47434055987314e-193	S-TGC	Ube2e3
Ube2h	2.41567257782389e-195	0.762803824420664	0.976	0.803	5.19683641667253e-191	S-TGC	Ube2h
Cdk171	2.48055943111835e-193	0.869166586716842	0.791	0.279	5.3364275041649e-189	S-TGC	Cdk17
Fam219a	5.55937963058682e-192	0.953601753750884	0.772	0.296	1.19598933992814e-187	S-TGC	Fam219a
Kcnq4	3.29198666898259e-190	0.662596599839611	0.305	0.019	7.08205092098225e-186	S-TGC	Kcnq4
Inpp5b	1.97515521194501e-189	0.719130510507136	0.465	0.074	4.24915140745731e-185	S-TGC	Inpp5b
Man1c11	2.18502426787991e-189	0.896988934916021	0.719	0.215	4.70064270749006e-185	S-TGC	Man1c1
Bahcc1	3.49468131940594e-188	0.568032333165002	0.255	0.007	7.518107922438e-184	S-TGC	Bahcc1
Grb2	3.66764203457335e-188	0.872136172719428	0.881	0.486	7.89019830897765e-184	S-TGC	Grb2
Brwd1	1.85774842716978e-187	0.842782405521356	0.904	0.518	3.99657419137035e-183	S-TGC	Brwd1
Zfp667	2.56578735941846e-187	0.701967774706594	0.54	0.106	5.51977834631694e-183	S-TGC	Zfp667
Mdfic	3.59805217238022e-187	0.884380289540412	0.527	0.111	7.74048963844157e-183	S-TGC	Mdfic
Slc39a14	4.61698798906451e-186	0.864060918258941	0.792	0.309	9.93252626087449e-182	S-TGC	Slc39a14
Dnaic1	3.71600260415139e-184	0.528413033877895	0.274	0.012	7.99423640231089e-180	S-TGC	Dnaic1
Etl4	6.16964598351127e-184	0.567244395880803	0.999	0.964	1.32727594043278e-179	S-TGC	Etl4
Pkig	3.27508857956518e-183	0.86242891954857	0.713	0.229	7.04569806121857e-179	S-TGC	Pkig
Ak8	3.56137039196977e-182	0.614531888040286	0.294	0.018	7.66157612424457e-178	S-TGC	Ak8
Usp3	2.63258566549897e-180	0.771944289665059	0.552	0.123	5.66348154218794e-176	S-TGC	Usp3
Prkacb	4.71342611161294e-180	0.817797788507646	0.523	0.111	1.01399935939129e-175	S-TGC	Prkacb
Dip2b	8.96072885052153e-179	0.844903507568996	0.893	0.479	1.9277215976127e-174	S-TGC	Dip2b
Fam78b	2.14070798824645e-178	0.893272682466141	0.896	0.514	4.60530509511458e-174	S-TGC	Fam78b
Snd1	2.75217615565514e-178	0.682861563106797	0.99	0.841	5.9207565636609e-174	S-TGC	Snd1
Arhgef2	1.01756553160163e-177	0.678179579185388	0.48	0.086	2.18908872813459e-173	S-TGC	Arhgef2
Nedd4l	2.95344992901756e-177	1.0885434072496	0.835	0.442	6.35375683229548e-173	S-TGC	Nedd4l
Pkp2	5.8247950101361e-175	0.838641883502195	0.767	0.299	1.25308815053058e-170	S-TGC	Pkp2
Rgma	1.05391836458531e-174	0.580070376252676	0.284	0.018	2.26729457773239e-170	S-TGC	Rgma
Tcf20	2.57367104527296e-174	0.558496536955926	1	0.897	5.53673851969572e-170	S-TGC	Tcf20
Mob3b	1.42883177886369e-173	0.863440797907872	0.832	0.377	3.07384580586945e-169	S-TGC	Mob3b
Col25a1	8.80586487855722e-173	0.897842313488462	0.283	0.019	1.89440571132402e-168	S-TGC	Col25a1
Klhl29	2.45163687271346e-172	1.00217982853072	0.544	0.131	5.27420640426846e-168	S-TGC	Klhl29
Ston2	3.87340411927554e-172	1.1345796872861	0.776	0.381	8.33285428179747e-168	S-TGC	Ston2
Gprc5c	1.20659367799654e-171	0.544531688687101	0.333	0.032	2.59574497947397e-167	S-TGC	Gprc5c
Plekha2	2.14664968832301e-171	0.676595559091873	0.397	0.058	4.61808747448929e-167	S-TGC	Plekha2
Atrx	2.60248242144003e-171	0.826301206931731	0.807	0.347	5.59872043324394e-167	S-TGC	Atrx
Plec	1.4309173359682e-170	0.819403207163652	0.888	0.49	3.0783324648684e-166	S-TGC	Plec
Lmbr1	2.39730270530896e-170	0.92964161231326	0.745	0.305	5.15731730993116e-166	S-TGC	Lmbr1
Rgl2	8.90769557055024e-170	0.882515874324774	0.546	0.134	1.91631254809247e-165	S-TGC	Rgl2
Rfx3	1.18149609301921e-168	0.766346446001837	0.512	0.112	2.54175254491223e-164	S-TGC	Rfx3
Ahdc11	1.78096303731875e-168	0.791132826312896	0.798	0.329	3.83138578218382e-164	S-TGC	Ahdc1
Shroom1	1.79704855625443e-167	0.667993079753004	0.451	0.079	3.86599055907016e-163	S-TGC	Shroom1
Zcchc111	2.13779359542304e-167	0.756875577239029	0.911	0.514	4.59903536183359e-163	S-TGC	Zcchc11
Ssbp4	3.08067481046465e-167	0.578448239269302	0.297	0.024	6.6274557197526e-163	S-TGC	Ssbp4
Gpd2	1.27511288814785e-165	0.869787772963385	0.678	0.235	2.74315035627246e-161	S-TGC	Gpd2
Blvrb	2.32872635951978e-165	0.531616655702437	0.278	0.019	5.0097890172349e-161	S-TGC	Blvrb
Cpm	2.09080695814754e-164	0.581374595059239	0.294	0.024	4.4979530090628e-160	S-TGC	Cpm
Cgnl1	2.26363403936817e-164	0.855222847544651	0.847	0.441	4.86975590889274e-160	S-TGC	Cgnl1
Fam49b	2.8591836020706e-163	0.769422910250504	0.896	0.506	6.15096168313449e-159	S-TGC	Fam49b
Mef2a	3.38887884334316e-162	0.812165908000418	0.792	0.339	7.29049505568413e-158	S-TGC	Mef2a
Map2k5	5.82794224369433e-162	0.754315236853343	0.881	0.47	1.25376521488596e-157	S-TGC	Map2k5
Pxn	9.61546537460369e-162	0.803735157162044	0.695	0.237	2.06857506603849e-157	S-TGC	Pxn
Plet1	6.30755222227369e-161	0.704525264269046	0.477	0.097	1.35694370957774e-156	S-TGC	Plet1
Ptpre1	1.23130461796416e-160	0.722416506116385	0.568	0.139	2.6489056246263e-156	S-TGC	Ptpre
Senp1	1.30190278110073e-160	0.762092203841841	0.638	0.192	2.80078345298199e-156	S-TGC	Senp1
Tgm1	1.04746660904855e-159	0.496742532127155	0.284	0.023	2.25341491604615e-155	S-TGC	Tgm1
Fam129a	8.63256949296818e-159	0.853956836250246	0.551	0.145	1.85712467502225e-154	S-TGC	Fam129a
Med13	1.15343421178759e-158	0.750656717797571	0.875	0.497	2.48138301981864e-154	S-TGC	Med13
Fignl2	1.33795263658339e-157	0.548724360525174	0.343	0.042	2.87833750708184e-153	S-TGC	Fignl2
Sipa1l2	2.95343967546602e-157	0.753271526018107	0.511	0.118	6.35373477383005e-153	S-TGC	Sipa1l2
Nid1	4.77422743917611e-157	0.748244680139127	0.712	0.253	1.02707954898996e-152	S-TGC	Nid1
Ddx46	1.27067322790338e-156	0.79319800670412	0.769	0.31	2.73359931518855e-152	S-TGC	Ddx46
Mettl24	1.49849212694886e-156	0.53944462666385	0.273	0.021	3.22370611270508e-152	S-TGC	Mettl24
F11r	2.17461408396406e-156	0.727744146328055	0.588	0.161	4.67824727883188e-152	S-TGC	F11r
Ccdc68	2.81596105844487e-156	0.645407602345814	0.477	0.096	6.05797702503245e-152	S-TGC	Ccdc68
Dapk2	3.17802984485338e-156	0.851821485102502	0.501	0.117	6.83689560523307e-152	S-TGC	Dapk2
Srgap2	6.58913304579963e-156	0.930230938733479	0.776	0.335	1.41752019214287e-151	S-TGC	Srgap2
Osbpl8	2.50786393035474e-155	0.861165031359244	0.859	0.485	5.39516767337215e-151	S-TGC	Osbpl8
Fndc3a	3.19260967263046e-155	0.914231403144142	0.821	0.439	6.86826118872991e-151	S-TGC	Fndc3a
Mid2	1.05830584851199e-154	0.566477928772146	0.306	0.031	2.27673337190385e-150	S-TGC	Mid2
Sec14l1	2.83612212750161e-153	0.789550559254706	0.648	0.214	6.10134953289421e-149	S-TGC	Sec14l1
Prcp	3.67727674854445e-152	0.636183167860092	0.467	0.096	7.91092546914367e-148	S-TGC	Prcp
Unc119b	4.25883686336133e-152	0.509779480405583	0.318	0.035	9.16203574414924e-148	S-TGC	Unc119b
Coro1c	6.25072797570155e-151	0.739207431698199	0.652	0.209	1.34471910941267e-146	S-TGC	Coro1c
4930554G24Rik	2.79561841456249e-150	0.768950360929159	0.26	0.02	6.01421389524828e-146	S-TGC	4930554G24Rik
Xylt1	4.27008676461163e-150	0.834710232380841	0.66	0.228	9.186237656709e-146	S-TGC	Xylt1
Nmt2	7.8847193376316e-150	0.727298934008115	0.574	0.156	1.69623967110469e-145	S-TGC	Nmt2
AI661453	4.70266249173939e-149	0.729194296425699	0.654	0.221	1.01168378184789e-144	S-TGC	AI661453
Mir17hg	7.31892219227218e-149	0.63339560719965	0.452	0.093	1.57451973122351e-144	S-TGC	Mir17hg
Slc43a2	5.65450556805175e-148	0.684099658636683	0.443	0.089	1.21645378285497e-143	S-TGC	Slc43a2
Pacsin3	7.55822005745351e-146	0.45676996548884	0.252	0.018	1.62599988095997e-141	S-TGC	Pacsin3
Klf7	1.04668917578585e-145	0.754109906970217	0.679	0.244	2.2517424238681e-141	S-TGC	Klf7
Car5b	1.12456304669325e-145	0.601708349935159	0.374	0.061	2.41927248235118e-141	S-TGC	Car5b
Ica1	1.0457015010398e-144	0.6975936429247	0.405	0.076	2.24961763918692e-140	S-TGC	Ica1
Rrbp11	1.2802193497492e-144	0.589169640832251	0.967	0.702	2.75413588711545e-140	S-TGC	Rrbp1
Specc1	2.88226198159015e-144	0.799568796923415	0.776	0.363	6.20061020099489e-140	S-TGC	Specc1
Esam	1.3420435274497e-143	0.508529472564686	0.298	0.034	2.88713824060253e-139	S-TGC	Esam
Wipf3	1.63952628218467e-143	0.759161359209801	0.614	0.202	3.52711289086387e-139	S-TGC	Wipf3
Mtf1	1.20316712253244e-142	0.58532091089393	0.431	0.085	2.58837343070404e-138	S-TGC	Mtf1
Arid1a1	2.05796620185382e-142	0.7356161313053	0.787	0.353	4.42730269004813e-138	S-TGC	Arid1a
Plpp31	4.85050284075314e-142	0.746722367731738	0.868	0.47	1.04348867613122e-137	S-TGC	Plpp3
Btbd11	2.47060316542567e-141	1.12487927681179	0.315	0.044	5.31500858978023e-137	S-TGC	Btbd11
Apbb2	8.46980502108787e-140	0.649803440796034	0.984	0.804	1.82210915418663e-135	S-TGC	Apbb2
Hivep1	1.3212534602961e-139	0.740453917036728	0.524	0.144	2.84241256913499e-135	S-TGC	Hivep1
Rin2	1.4534649707199e-139	0.821674484834068	0.547	0.162	3.12683919150971e-135	S-TGC	Rin2
Adap21	1.54315836840939e-139	0.593434021983354	0.557	0.146	3.31979659795911e-135	S-TGC	Adap2
Rabgap1l	3.98522871830649e-139	1.09859539216367	0.814	0.499	8.57342254169275e-135	S-TGC	Rabgap1l
Hmgn5	1.13638120780274e-138	0.637140368687227	0.442	0.096	2.44469689234603e-134	S-TGC	Hmgn5
Pdia5	2.61152981252476e-138	0.704084315699859	0.523	0.14	5.61818408568452e-134	S-TGC	Pdia5
Scaf11	2.6723115215482e-138	0.71609051901417	0.846	0.443	5.74894377630664e-134	S-TGC	Scaf11
Trim6	6.11787235854405e-138	0.621715945628991	0.535	0.143	1.31613788049358e-133	S-TGC	Trim6
Zbtb38	3.44472937329895e-137	0.633257012627083	0.517	0.134	7.41064630077804e-133	S-TGC	Zbtb38
Arpc1b	1.80376773122908e-136	0.618301643030298	0.583	0.17	3.88044552019313e-132	S-TGC	Arpc1b
Sgms1	1.89519121731581e-136	0.838449277694165	0.861	0.572	4.0771248658115e-132	S-TGC	Sgms1
Acvrl1	3.98914490407312e-136	0.466538308859659	0.257	0.023	8.5818474321325e-132	S-TGC	Acvrl1
Upp1	6.65285384536753e-136	0.457095569966843	0.277	0.029	1.43122844775392e-131	S-TGC	Upp1
Apobr	2.59637605769638e-135	0.524205901406532	0.358	0.059	5.58558381292222e-131	S-TGC	Apobr
Ctsq	3.9824596829377e-135	1.91983203473331	0.663	0.374	8.56746551590387e-131	S-TGC	Ctsq
Ube2a	1.05937691494097e-134	0.510384813259469	0.322	0.045	2.27903755711251e-130	S-TGC	Ube2a
Cand2	1.14403461993144e-133	0.534092086403825	0.313	0.043	2.46116167785851e-129	S-TGC	Cand2
Calm2	3.45832161259702e-133	0.674666896076878	0.659	0.235	7.43988728517998e-129	S-TGC	Calm2
Ptk2	6.81007436119225e-133	0.65505724901131	0.936	0.665	1.46505129732329e-128	S-TGC	Ptk2
Gnb1	8.49913979877174e-133	0.562907346684884	0.962	0.793	1.82841994490976e-128	S-TGC	Gnb1
Nrk	2.72011473773913e-132	0.563421913682585	0.971	0.837	5.85178283529819e-128	S-TGC	Nrk
Socs5	4.64538328196454e-132	0.528448547361196	0.326	0.049	9.99361305449031e-128	S-TGC	Socs5
Deptor	6.17190353458558e-132	0.53619089364202	0.277	0.032	1.3277616073954e-127	S-TGC	Deptor
Rai14	7.43030040118455e-132	0.75444830157911	0.615	0.215	1.59848052530683e-127	S-TGC	Rai14
Itih5	1.81734195616926e-131	0.495405652344379	0.281	0.033	3.90964775030694e-127	S-TGC	Itih5
Trim7	2.25208121882657e-131	0.533132745239382	0.363	0.064	4.84490232606161e-127	S-TGC	Trim7
Prrg4	2.39155440821107e-131	0.485591195860599	0.298	0.038	5.14495099838448e-127	S-TGC	Prrg4
1700017B05Rik	5.59116793260137e-131	0.553236173742736	0.382	0.072	1.20282795734053e-126	S-TGC	1700017B05Rik
Tspan9	5.65793894778219e-131	0.802860533985583	0.913	0.704	1.21719240583638e-126	S-TGC	Tspan9
Nsd2	7.32376893417212e-131	0.763107316017227	0.696	0.281	1.57556241080845e-126	S-TGC	Nsd2
Rap1gds11	1.17714674105646e-130	0.725853624505864	0.696	0.277	2.53239578403477e-126	S-TGC	Rap1gds1
Dcakd	4.00625575510212e-130	0.67016541569263	0.63	0.218	8.6186580059512e-126	S-TGC	Dcakd
Furin	6.75369483556765e-129	0.549907166798766	0.4	0.081	1.45292236997567e-124	S-TGC	Furin
Sh3bgrl2	9.80402289650435e-129	0.508891272808382	0.347	0.058	2.10913944572498e-124	S-TGC	Sh3bgrl2
Ldlrap1	4.42914568931547e-128	0.51328376698628	0.329	0.052	9.52842112142437e-124	S-TGC	Ldlrap1
Nrip1	5.09329550783644e-128	0.649443036860427	0.939	0.718	1.09572066260085e-123	S-TGC	Nrip1
Lims1	9.23847629015654e-128	0.626788161647549	0.925	0.707	1.98747340430138e-123	S-TGC	Lims1
Clip2	1.60193047560115e-127	0.624178854422202	0.876	0.483	3.44623303216076e-123	S-TGC	Clip2
Phc1	1.92286210734965e-127	0.448151983252734	0.307	0.043	4.13665325154131e-123	S-TGC	Phc1
Rbl1	2.71708053778095e-127	0.494118540130123	0.316	0.047	5.84525536092816e-123	S-TGC	Rbl1
Sorcs2	2.86615853448793e-127	0.701623966448715	0.475	0.12	6.16596685524389e-123	S-TGC	Sorcs2
Senp2	9.17474644887715e-126	0.670347028758989	0.815	0.422	1.97376320354694e-121	S-TGC	Senp2
Fstl3	1.77373960720784e-125	0.516653477651299	0.363	0.067	3.81584601698623e-121	S-TGC	Fstl3
Plekhg1	5.80426612796488e-125	0.747041423633726	0.757	0.354	1.24867177210908e-120	S-TGC	Plekhg1
Rps6ka1	6.99292969896164e-125	0.602562619500088	0.455	0.114	1.50438896613762e-120	S-TGC	Rps6ka1
Tapt1	2.73502271970582e-124	0.611523368361466	0.527	0.154	5.88385437690313e-120	S-TGC	Tapt1
Kras	1.12331668614335e-123	0.652088511734545	0.536	0.163	2.41659118690019e-119	S-TGC	Kras
Fmnl3	3.31712367207164e-123	0.653640577101608	0.496	0.139	7.13612815572772e-119	S-TGC	Fmnl3
Eml3	4.8196825156631e-123	0.511534904945241	0.391	0.081	1.0368582995946e-118	S-TGC	Eml3
Ctsr	5.72356162256823e-123	0.534226573173707	0.304	0.045	1.2313098118631e-118	S-TGC	Ctsr
Crybg1	3.37669673852978e-122	0.496029560360574	0.337	0.057	7.26428769359912e-118	S-TGC	Crybg1
Gm265421	3.70799673465531e-122	0.605194873154926	0.724	0.295	7.97701337526397e-118	S-TGC	Gm26542
Zfp395	1.84998951369246e-121	0.551304982769417	0.368	0.072	3.9798824408066e-117	S-TGC	Zfp395
Ikzf2	8.17678065185266e-121	0.489905246614519	0.274	0.035	1.75907082163306e-116	S-TGC	Ikzf2
Pkp41	2.42448977927197e-120	0.701148101368549	0.693	0.29	5.21580486214779e-116	S-TGC	Pkp4
Sparc	3.83503619692748e-120	0.572667652555701	0.475	0.124	8.25031337045008e-116	S-TGC	Sparc
Rab6b	5.89010025917403e-120	0.648831749059606	0.642	0.237	1.26713726875611e-115	S-TGC	Rab6b
Hand1	1.77813577041584e-119	0.438909805398424	0.26	0.031	3.8253034828956e-115	S-TGC	Hand1
Cnot6l	7.91075994812163e-119	0.599917994337488	0.568	0.183	1.70184178763941e-114	S-TGC	Cnot6l
Qk	8.25063130838351e-118	0.665238956279779	0.841	0.491	1.77495831337254e-113	S-TGC	Qk
Tbc1d8	1.16450474874966e-117	0.560668098544056	0.388	0.084	2.50519906598514e-113	S-TGC	Tbc1d8
Slf2	5.28585924210628e-117	0.660752634576575	0.784	0.394	1.13714689875432e-112	S-TGC	Slf2
Fscn1	1.74406600712786e-116	0.582147219141902	0.512	0.151	3.75200920113417e-112	S-TGC	Fscn1
Nr2f2	1.96586980937099e-116	0.514249471127442	0.348	0.067	4.22917572089982e-112	S-TGC	Nr2f2
A4galt	4.01938593184557e-116	0.580297101591989	0.371	0.078	8.64690495517938e-112	S-TGC	A4galt
Akap1	1.64971691513295e-115	0.492651691917385	0.341	0.064	3.54903599952551e-111	S-TGC	Akap1
Uck2	8.96623975010277e-115	0.638179127366605	0.384	0.086	1.92890715743961e-110	S-TGC	Uck2
Pds5a	3.77398306695313e-114	0.622661750450965	0.9	0.618	8.11896977193627e-110	S-TGC	Pds5a
Afap1l2	4.25381451506107e-114	0.573210659991889	0.959	0.819	9.15123116625089e-110	S-TGC	Afap1l2
Slc38a41	6.23992726571752e-114	0.462693439848845	0.881	0.431	1.34239555267381e-109	S-TGC	Slc38a4
Rapgef1	9.61216520118625e-114	0.479037712407913	0.986	0.819	2.0678650997312e-109	S-TGC	Rapgef1
Acvr1	6.13652558317275e-113	0.551272684681662	0.376	0.083	1.32015074870795e-108	S-TGC	Acvr1
Shisa5	1.0337677055533e-112	0.468252318160058	0.295	0.047	2.22394446495681e-108	S-TGC	Shisa5
Ppard	1.66567210449663e-112	0.65392377481986	0.538	0.179	3.5833603984036e-108	S-TGC	Ppard
Ispd	6.08816928653834e-112	0.675575268524135	0.622	0.242	1.30974785861299e-107	S-TGC	Ispd
Nos2	9.77042264445045e-112	0.482029280607794	0.357	0.073	2.10191102350063e-107	S-TGC	Nos2
Xpnpep1	1.33654070626458e-111	0.629609529013258	0.633	0.241	2.875300021387e-107	S-TGC	Xpnpep1
Jdp2	1.80356675473959e-111	0.476934725798405	0.288	0.045	3.88001315947128e-107	S-TGC	Jdp2
Slc30a4	6.16668591323231e-111	0.412889807298127	0.31	0.053	1.32663914051367e-106	S-TGC	Slc30a4
Lrch3	1.06252200069979e-110	0.633437858650868	0.756	0.362	2.28580358010545e-106	S-TGC	Lrch3
Ptp4a3	1.50204289856499e-110	0.434678661622386	0.265	0.037	3.23134488768287e-106	S-TGC	Ptp4a3
Tagln2	4.0191633202987e-110	0.505434122643489	0.412	0.1	8.64642605095858e-106	S-TGC	Tagln2
Ptprj	6.08143139623156e-110	0.794432771634103	0.513	0.173	1.3082983362713e-105	S-TGC	Ptprj
Adam10	1.03811463262508e-109	0.613564408888522	0.737	0.342	2.23329600916634e-105	S-TGC	Adam10
Jcad	1.84843777464769e-109	0.518386209384413	0.297	0.051	3.97654418459958e-105	S-TGC	Jcad
Mageb16	2.21202982437409e-109	0.469925957244255	0.336	0.066	4.75873976117598e-105	S-TGC	Mageb16
Spats21	2.66946292142926e-109	0.674740571908677	0.663	0.276	5.74281558287077e-105	S-TGC	Spats2
Micu3	1.62860828013892e-108	0.452281982850448	0.339	0.067	3.50362499306285e-104	S-TGC	Micu3
Rasgef1b	1.95992688972916e-108	0.521992276421283	0.45	0.119	4.21639071787434e-104	S-TGC	Rasgef1b
Bcar31	1.68804856358603e-107	0.449964071406875	0.875	0.458	3.63149887484262e-103	S-TGC	Bcar3
Tle4	8.09766917237456e-107	0.551170692165788	0.482	0.141	1.74205156905294e-102	S-TGC	Tle4
Nav3	1.10344519582285e-106	0.72600064254502	0.629	0.256	2.37384164977369e-102	S-TGC	Nav3
Nt5c2	1.77836494170679e-105	0.588249319744799	0.453	0.13	3.82579649909382e-101	S-TGC	Nt5c2
Pros1	1.96931367452225e-105	0.533310182575406	0.429	0.116	4.23658450799972e-101	S-TGC	Pros1
Adam12	2.26756321789368e-105	0.58505372497276	0.36	0.08	4.87820875065468e-101	S-TGC	Adam12
Dock11	2.5884588822454e-104	0.690579204593059	0.881	0.596	5.56855159337452e-100	S-TGC	Dock1
Park2	1.3116321565451e-102	0.980839832777458	0.698	0.42	2.82171425837547e-98	S-TGC	Park2
Slc8b11	4.11013549513796e-102	0.443018417038563	0.483	0.139	8.8421344906903e-98	S-TGC	Slc8b1
Pak2	8.01503126780628e-102	0.585334739476916	0.844	0.482	1.72427367664316e-97	S-TGC	Pak2
Rgs5	6.98195171469123e-101	0.442368277781528	0.296	0.054	1.50202727238152e-96	S-TGC	Rgs5
Arvcf	1.54127805119933e-100	0.543281389974584	0.429	0.121	3.31575147154512e-96	S-TGC	Arvcf
Tbl1x	1.79593547788467e-100	0.573748047244146	0.89	0.642	3.86359599357329e-96	S-TGC	Tbl1x
Smc5	1.93637323489715e-100	0.556201873894045	0.721	0.33	4.16571974023425e-96	S-TGC	Smc5
Ksr1	4.36480973403985e-100	0.586267745880914	0.279	0.05	9.39001518083993e-96	S-TGC	Ksr1
Wnk1	1.00362411889702e-99	0.49602641919762	0.969	0.823	2.15909656698315e-95	S-TGC	Wnk1
Yaf2	1.26938620821063e-99	0.58754771985857	0.645	0.263	2.73083054972353e-95	S-TGC	Yaf2
Gale	2.34495785696414e-99	0.396741373093577	0.29	0.052	5.04470783768695e-95	S-TGC	Gale
St6galnac2	2.3653505744138e-99	0.459825398464956	0.362	0.084	5.0885786907364e-95	S-TGC	St6galnac2
Strn	2.45536773419125e-99	0.584821653345483	0.612	0.249	5.28223260656564e-95	S-TGC	Strn
Map2k1	9.12556893209095e-99	0.58578970001321	0.873	0.602	1.96318364436073e-94	S-TGC	Map2k1
Pacsin21	9.53388706015593e-98	0.538298368532002	0.887	0.55	2.05102512325134e-93	S-TGC	Pacsin2
Ppfibp1	1.46138122447291e-97	0.599198119749272	0.785	0.437	3.14386942820857e-93	S-TGC	Ppfibp1
Trrap	1.82289208635137e-97	0.576913017696765	0.815	0.464	3.92158774536769e-93	S-TGC	Trrap
Ldlr	3.28321634979495e-97	0.607772681623306	0.712	0.34	7.06318333331387e-93	S-TGC	Ldlr
Gnaq	2.43261893452075e-96	0.465262039245791	0.983	0.85	5.23329311383449e-92	S-TGC	Gnaq
Spaca6	3.77783095892754e-96	0.479864396111075	0.28	0.052	8.12724774194081e-92	S-TGC	Spaca6
Ralgps2	2.2573912994411e-95	0.538723177246634	0.532	0.186	4.85632590248763e-91	S-TGC	Ralgps2
Dlc11	6.12936133529098e-95	0.627080347226981	0.841	0.536	1.31860950406115e-90	S-TGC	Dlc1
Ogt	1.37044167831255e-94	0.689440852687041	0.817	0.501	2.94823118255379e-90	S-TGC	Ogt
Trpv21	1.40585571516458e-94	0.417141407104933	0.438	0.122	3.02441740003356e-90	S-TGC	Trpv2
Sorbs11	1.97630185565982e-94	0.404677419547509	0.991	0.897	4.25161818208097e-90	S-TGC	Sorbs1
Meis2	2.0577468147058e-94	0.687903173287442	0.581	0.24	4.42683072247658e-90	S-TGC	Meis2
Tmem164	6.72039043767332e-94	0.555421528561691	0.83	0.464	1.44575759485666e-89	S-TGC	Tmem164
Pam	1.09811334990294e-93	0.562134055136051	0.548	0.198	2.3623712496462e-89	S-TGC	Pam
Brd7	1.21246066409307e-93	0.503019026996776	0.447	0.135	2.60836662666343e-89	S-TGC	Brd7
Fmr1	2.88093919056096e-93	0.494712668381682	0.434	0.128	6.1977644806538e-89	S-TGC	Fmr1
Ttc7b	4.52135715549826e-93	0.52446559261095	0.909	0.674	9.72679564862341e-89	S-TGC	Ttc7b
Arhgap17	1.14118343143666e-92	0.556694048673575	0.808	0.462	2.45502791604968e-88	S-TGC	Arhgap17
Prl7d1	1.47637372928861e-92	0.639043033828737	0.485	0.171	3.17612280381858e-88	S-TGC	Prl7d1
Xiap	1.6651626368947e-92	0.561739874368854	0.644	0.279	3.58226438075157e-88	S-TGC	Xiap
Tgfbr3	4.38634192809589e-92	0.525781514065464	0.932	0.661	9.4363373899127e-88	S-TGC	Tgfbr3
Gm47283	4.63577436912813e-92	0.436390313608886	0.986	0.907	9.97294140030535e-88	S-TGC	Gm47283
Rapgef5	1.08955452772121e-91	0.562368661596076	0.456	0.147	2.34395865548664e-87	S-TGC	Rapgef5
Mast4	1.61536136857298e-91	0.99942107384714	0.736	0.468	3.47512691221105e-87	S-TGC	Mast4
Mpdz	1.92999939488814e-91	0.452013371703126	0.356	0.09	4.15200769822286e-87	S-TGC	Mpdz
Mta3	3.47126716546822e-91	0.47861091952906	0.942	0.727	7.46773705307179e-87	S-TGC	Mta3
Cers61	1.54854042884487e-90	0.727510129075837	0.602	0.273	3.33137502457396e-86	S-TGC	Cers6
Hmgn11	1.93283562741539e-90	0.511621458667603	0.489	0.165	4.15810928525873e-86	S-TGC	Hmgn1
Usp6nl	3.07777643624318e-90	0.571958452111239	0.757	0.398	6.62122044728995e-86	S-TGC	Usp6nl
Raph1	3.70912768965008e-90	0.561665099845067	0.705	0.34	7.97944639874422e-86	S-TGC	Raph1
Rdx	6.5413684454673e-90	0.58572571685387	0.736	0.387	1.40724459367338e-85	S-TGC	Rdx
Hunk	9.2417963477567e-90	0.552373752434607	0.255	0.046	1.9881876482929e-85	S-TGC	Hunk
Cyth3	1.28795989440207e-89	0.558483863177007	0.607	0.253	2.77078812082717e-85	S-TGC	Cyth3
Ripor1	1.62512721263941e-89	0.510060522748177	0.533	0.195	3.49613617255115e-85	S-TGC	Ripor1
Myo18a	8.34762719466511e-89	0.47986169007803	0.943	0.711	1.79582503838831e-84	S-TGC	Myo18a
Odc1	1.21956124773082e-88	0.458024549194158	0.391	0.109	2.62364211224331e-84	S-TGC	Odc1
Prpf38b	1.2498767443617e-88	0.567542113701787	0.657	0.304	2.68885984014533e-84	S-TGC	Prpf38b
Tbc1d5	3.80376201436339e-88	0.566880847684684	0.767	0.41	8.18303322149997e-84	S-TGC	Tbc1d5
4931406C07Rik	5.72762522488945e-88	0.479874954593897	0.428	0.131	1.23218401463047e-83	S-TGC	4931406C07Rik
Arhgap21	9.63615874876415e-88	0.540496233403498	0.757	0.4	2.07302683162163e-83	S-TGC	Arhgap21
Vps13b	1.24942426304636e-87	0.530067157404397	0.898	0.611	2.68788641709163e-83	S-TGC	Vps13b
Ppp4r2	1.76459954231601e-87	0.529880693160207	0.642	0.285	3.79618299538443e-83	S-TGC	Ppp4r2
Afdn	4.46595709309403e-87	0.517878746331984	0.891	0.624	9.60761349437319e-83	S-TGC	Afdn
4930402H24Rik	1.24074476901887e-86	0.560318698755169	0.766	0.429	2.6692142215903e-82	S-TGC	4930402H24Rik
Errfi1	1.3001499791422e-86	0.53017517585695	0.518	0.189	2.79701265012861e-82	S-TGC	Errfi1
H191	3.70703959827431e-86	0.449959160201143	0.692	0.306	7.97495428776752e-82	S-TGC	H19
Phf81	5.43852998735009e-86	0.649402300605757	0.679	0.362	1.16999095617863e-81	S-TGC	Phf8
Mier3	8.59218011450826e-86	0.432971520624982	0.348	0.09	1.84843570803416e-81	S-TGC	Mier3
Brpf1	1.31314396756218e-85	0.44837671202423	0.443	0.14	2.82496661741653e-81	S-TGC	Brpf1
Slc35d1	1.68384200757574e-85	0.427310977465181	0.31	0.072	3.6224493108977e-81	S-TGC	Slc35d1
Gna11	2.40066327803708e-85	0.421547643289466	0.322	0.078	5.16454691004116e-81	S-TGC	Gna11
Acaa1a	4.06085561645357e-85	0.517519691452639	0.452	0.152	8.73611868767657e-81	S-TGC	Acaa1a
Crtc3	5.18638630747429e-85	0.503678082792038	0.65	0.287	1.11574728632694e-80	S-TGC	Crtc3
Ezr1	5.3580424760059e-85	0.531937410690448	0.772	0.409	1.15267567786315e-80	S-TGC	Ezr
Arid2	5.79756208378089e-85	0.562098358335128	0.788	0.464	1.24722953108378e-80	S-TGC	Arid2
Taf15	2.11357306651745e-84	0.515081349989807	0.821	0.494	4.546929737999e-80	S-TGC	Taf15
Yars	5.41527360879411e-84	0.506054029655262	0.637	0.278	1.16498781145988e-79	S-TGC	Yars
Ralgapa2	5.66545273584314e-84	0.557535951776848	0.581	0.244	1.21880884706194e-79	S-TGC	Ralgapa2
Ing1	1.04405446842412e-83	0.367581509716876	0.253	0.047	2.2460743779208e-79	S-TGC	Ing1
Tcirg1	1.30947982574988e-83	0.42477484898911	0.253	0.048	2.81708394913572e-79	S-TGC	Tcirg1
Edem2	2.40504667855419e-83	0.469651130640952	0.435	0.141	5.17397691957362e-79	S-TGC	Edem2
Ctsj	2.63906732235904e-83	0.724775463634178	0.509	0.207	5.67742553059101e-79	S-TGC	Ctsj
Sema3f	4.85878973471201e-83	0.478705756913096	0.412	0.128	1.0452714356286e-78	S-TGC	Sema3f
Fbxw8	5.93412682737438e-83	0.50806157382637	0.92	0.712	1.27660870437305e-78	S-TGC	Fbxw8
Sash1	7.93182050838561e-83	0.549003562451113	0.723	0.37	1.706372545969e-78	S-TGC	Sash1
Vps37b	1.17668447609419e-82	0.437056520833607	0.33	0.084	2.53140131342143e-78	S-TGC	Vps37b
Plekhh2	1.33096670437012e-82	0.596080548262191	0.278	0.063	2.86330867111144e-78	S-TGC	Plekhh2
Stk39	1.41289624658076e-82	0.801495704264085	0.744	0.475	3.0395636952692e-78	S-TGC	Stk39
Mkln1	1.73367957508125e-82	0.518642525128294	0.887	0.616	3.7296648698723e-78	S-TGC	Mkln1
Shoc2	2.99061988850821e-82	0.51811052851294	0.77	0.426	6.43372056614771e-78	S-TGC	Shoc2
Myh10	4.03263799292833e-82	0.523321468863454	0.433	0.145	8.67541411418673e-78	S-TGC	Myh10
Mapre3	9.48091368963978e-82	0.405440254791206	0.269	0.056	2.03962896205221e-77	S-TGC	Mapre3
Pnkd	1.08136695059125e-81	0.467629057682573	0.437	0.143	2.32634472080697e-77	S-TGC	Pnkd
Dcaf5	3.24658608039621e-80	0.497110141197554	0.648	0.294	6.98438063475636e-76	S-TGC	Dcaf5
Lrrc58	4.34998011110436e-80	0.465098326676695	0.507	0.188	9.3581122130188e-76	S-TGC	Lrrc58
Slc30a7	1.50728377159011e-79	0.493267590758214	0.524	0.207	3.24261957782181e-75	S-TGC	Slc30a7
Mfsd14b	1.77855347782841e-79	0.473426861817344	0.443	0.152	3.82620209685226e-75	S-TGC	Mfsd14b
Basp11	2.34639396108279e-79	0.421944630456869	0.954	0.791	5.04779732847741e-75	S-TGC	Basp1
Lrrc8c	8.33536217898549e-79	0.536562344702121	0.395	0.125	1.79318646556515e-74	S-TGC	Lrrc8c
Pip4k2c	1.00088271041276e-78	0.422006513708763	0.372	0.109	2.15319897491098e-74	S-TGC	Pip4k2c
Hsd17b4	2.25016410009749e-78	0.540526064388568	0.668	0.343	4.84077802853972e-74	S-TGC	Hsd17b4
Cradd	3.2436926233074e-78	0.526569370439304	0.38	0.119	6.97815594052121e-74	S-TGC	Cradd
Ppip5k2	8.10289063488516e-78	0.392193769957368	0.35	0.097	1.74317486228284e-73	S-TGC	Ppip5k2
Litaf	1.06403363851134e-77	0.501528584581575	0.621	0.282	2.28905556652944e-73	S-TGC	Litaf
Pdss2	1.25709675213909e-77	0.504001332168294	0.649	0.306	2.70439224287682e-73	S-TGC	Pdss2
Gm20696	1.51107331514385e-77	0.418518420272297	0.27	0.06	3.25077202286896e-73	S-TGC	Gm20696
Tsc22d2	2.60858555677407e-77	0.502535309481623	0.559	0.234	5.61185010828805e-73	S-TGC	Tsc22d2
Spidr	2.83933568868749e-77	0.467351095103383	0.426	0.142	6.10826286707339e-73	S-TGC	Spidr
Znrf2	4.22565982713361e-77	0.453424986373788	0.393	0.124	9.09066198611254e-73	S-TGC	Znrf2
Myo1b	4.92229203556271e-77	0.438869385412114	0.935	0.712	1.05893268561061e-72	S-TGC	Myo1b
Frmd6	5.4209819833209e-77	0.47095776608812	0.543	0.218	1.16621585407183e-72	S-TGC	Frmd6
Map3k3	1.1405382361913e-76	0.507699838736719	0.611	0.277	2.45363990751834e-72	S-TGC	Map3k3
Rnf2	2.81547454614486e-76	0.475291554425268	0.503	0.193	6.05693039112144e-72	S-TGC	Rnf2
Xrcc5	3.66973210782458e-76	0.370427449048788	0.259	0.056	7.89469468356303e-72	S-TGC	Xrcc5
Cbx3	4.26091131770691e-76	0.431969780344523	0.33	0.09	9.16649851778288e-72	S-TGC	Cbx3
2410018L13Rik	5.01201044675974e-76	0.522791820292704	0.708	0.374	1.07823380741142e-71	S-TGC	2410018L13Rik
Nek6	1.4379304749323e-75	0.38961982075497	0.301	0.076	3.09341983072187e-71	S-TGC	Nek6
Stk3	1.9012725773108e-75	0.50402449105616	0.789	0.463	4.09020769556872e-71	S-TGC	Stk3
Mvb12b	3.17914296216579e-75	0.473639003514141	0.33	0.093	6.83929025450727e-71	S-TGC	Mvb12b
Phactr1	8.17699946735193e-75	0.436527776832868	0.434	0.147	1.75911789541142e-70	S-TGC	Phactr1
Myh9	1.83351219310921e-74	0.371764601310792	0.989	0.89	3.94443478103583e-70	S-TGC	Myh9
Rexo5	2.66715177131944e-74	0.367156921177888	0.251	0.054	5.7378436056395e-70	S-TGC	Rexo5
Tfap2c	3.24849065040474e-74	0.453832116963088	0.494	0.185	6.98847793621571e-70	S-TGC	Tfap2c
Bcl6	4.35343955372248e-74	0.42262965743371	0.351	0.103	9.36555451192318e-70	S-TGC	Bcl6
E2f7	7.67496226250646e-74	0.451769027943959	0.361	0.111	1.65111463153302e-69	S-TGC	E2f7
Phldb21	8.71671148475214e-74	0.41127878017647	0.674	0.314	1.87522614171473e-69	S-TGC	Phldb2
Prim2	9.22083991160106e-74	0.560112885276907	0.59	0.27	1.98367929018274e-69	S-TGC	Prim2
Nkain21	1.76584814896425e-73	0.407619563072104	0.656	0.32	3.7988691228668e-69	S-TGC	Nkain2
Mprip	1.83568724398695e-73	0.420831669551613	0.939	0.768	3.94911396798913e-69	S-TGC	Mprip
Gmds	5.96511899591911e-73	0.559448076600004	0.775	0.498	1.28327604959208e-68	S-TGC	Gmds
Rassf1	8.76627435579334e-73	0.423312818767722	0.375	0.118	1.88588860216182e-68	S-TGC	Rassf1
Hpcal1	1.90649407764556e-72	0.461327566899866	0.466	0.173	4.10144070923889e-68	S-TGC	Hpcal1
Cep164	2.65465834272389e-72	0.532617813746427	0.574	0.261	5.7109664927019e-68	S-TGC	Cep164
Mcph1	3.11665192664717e-72	0.544408688157825	0.58	0.264	6.70485328979606e-68	S-TGC	Mcph1
Rhox6	8.29155365412485e-72	0.397260676535169	0.354	0.106	1.78376193761188e-67	S-TGC	Rhox6
Dsc2	2.5532558370384e-71	0.435870487916636	0.429	0.152	5.49281928222071e-67	S-TGC	Dsc2
Zfp808	4.4135407541169e-71	0.403191796818854	0.308	0.084	9.49485022433168e-67	S-TGC	Zfp808
Hdlbp	1.53652381093762e-70	0.462975005240094	0.699	0.366	3.3055236744701e-66	S-TGC	Hdlbp
Stard10	2.76189184940357e-70	0.343316113384261	0.254	0.058	5.9416579356219e-66	S-TGC	Stard10
Pag1	3.77820319545491e-70	0.482385004299259	0.694	0.359	8.12804853438215e-66	S-TGC	Pag1
Tcf7l11	5.61614764049295e-70	0.619223792015891	0.503	0.213	1.20820184189925e-65	S-TGC	Tcf7l1
Arhgap311	5.74474177204046e-70	0.378451889812891	0.963	0.836	1.23586629741906e-65	S-TGC	Arhgap31
Cbfb	6.74762459466856e-70	0.439802252517235	0.346	0.105	1.45161647905105e-65	S-TGC	Cbfb
Ppcdc	6.78927332854595e-70	0.427918955884528	0.487	0.187	1.46057637117009e-65	S-TGC	Ppcdc
Pex5	9.98592128072795e-70	0.418577260694102	0.442	0.161	2.148271245123e-65	S-TGC	Pex5
Pfkp1	1.08722770803294e-69	0.414493290097594	0.482	0.178	2.33895296829127e-65	S-TGC	Pfkp
C330007P06Rik	2.21722113188195e-69	0.364498436541761	0.299	0.08	4.76990782101764e-65	S-TGC	C330007P06Rik
Crlf3	4.48836256221573e-69	0.468227724861952	0.507	0.21	9.6558143800947e-65	S-TGC	Crlf3
Dcaf12	7.68027557829996e-69	0.468006600775053	0.523	0.221	1.65225768515967e-64	S-TGC	Dcaf12
Nedd41	1.08070102905502e-68	0.432074900618634	0.842	0.547	2.32491212380606e-64	S-TGC	Nedd4
Psip1	1.20216065797684e-68	0.414349484547708	0.416	0.144	2.58620822350558e-64	S-TGC	Psip1
Ranbp9	1.46667200357401e-68	0.462599495646568	0.684	0.348	3.15525148128876e-64	S-TGC	Ranbp9
Cdk13	1.76813481866157e-68	0.513274331807028	0.736	0.43	3.80378843538663e-64	S-TGC	Cdk13
Celf1	3.25454369498666e-68	0.458394882252328	0.832	0.536	7.0014998510248e-64	S-TGC	Celf1
Smyd2	4.85473098900665e-68	0.428131652456978	0.425	0.152	1.044398277665e-63	S-TGC	Smyd2
Ncoa2	4.9319233756071e-68	0.559251393121692	0.888	0.799	1.06100467579435e-63	S-TGC	Ncoa2
Kiz	1.15678487693068e-67	0.345112801935425	0.264	0.064	2.48859130574097e-63	S-TGC	Kiz
Thoc2	1.79524852686119e-67	0.454430606515831	0.795	0.494	3.86211815583647e-63	S-TGC	Thoc2
Usp47	4.12724441931662e-67	0.438247791374858	0.823	0.517	8.87894091927585e-63	S-TGC	Usp47
Hic2	1.31500616605813e-66	0.454065071479	0.753	0.441	2.82897276504085e-62	S-TGC	Hic2
Slc35b3	1.70095691955348e-66	0.331023225563749	0.285	0.075	3.65926862103539e-62	S-TGC	Slc35b3
Dhdds	2.25760638678515e-66	0.445609374142131	0.493	0.202	4.8567886198909e-62	S-TGC	Dhdds
Grk2	2.60954906750859e-66	0.404436656879546	0.371	0.123	5.61392290893124e-62	S-TGC	Grk2
Asph	2.90109591913169e-66	0.40638828963323	0.346	0.109	6.24112765082801e-62	S-TGC	Asph
Trip12	5.29203991319623e-66	0.345109240656925	0.971	0.876	1.1384765465259e-61	S-TGC	Trip12
Acer3	5.55289722556373e-66	0.407586843973208	0.288	0.079	1.19459478013553e-61	S-TGC	Acer3
Uba2	6.08359996467246e-66	0.42385375564379	0.463	0.179	1.30876486039999e-61	S-TGC	Uba2
BC052040	1.01604870173336e-65	0.468770435320703	0.664	0.341	2.18582557203898e-61	S-TGC	BC052040
Igf2bp31	1.41843092921824e-65	0.4550782450099	0.631	0.306	3.0514704580272e-61	S-TGC	Igf2bp3
Jak1	2.79011846010766e-65	0.462521031705998	0.722	0.396	6.00238184322962e-61	S-TGC	Jak1
Atxn7l1	2.92371876805715e-65	0.479048371767992	0.841	0.542	6.28979618572135e-61	S-TGC	Atxn7l1
Acin1	4.38281643390004e-65	0.433919969481669	0.844	0.554	9.42875299424916e-61	S-TGC	Acin1
Dpf3	6.33884715048604e-65	0.402585457387339	0.941	0.729	1.36367618748406e-60	S-TGC	Dpf3
Rxra	1.40304192599812e-64	0.410502184891489	0.48	0.192	3.01836409539976e-60	S-TGC	Rxra
Rp2	2.43298725887332e-64	0.354112346104556	0.283	0.077	5.23408549001418e-60	S-TGC	Rp2
Gna12	3.0678953770841e-64	0.44189997797896	0.642	0.321	6.59996332472103e-60	S-TGC	Gna12
Rnf138	4.27912835621218e-64	0.403971940773545	0.476	0.191	9.20568883271926e-60	S-TGC	Rnf138
Lin54	5.20386888067975e-64	0.398881422795857	0.281	0.077	1.11950831230063e-59	S-TGC	Lin54
Rab3ip	5.28407810840531e-64	0.415243899475419	0.538	0.237	1.13676372346124e-59	S-TGC	Rab3ip
Arl13b	2.82587046293654e-63	0.352190286893674	0.315	0.094	6.07929512691538e-59	S-TGC	Arl13b
Aven	4.65320005893492e-63	0.33881516292846	0.312	0.092	1.00104292867867e-58	S-TGC	Aven
Fbxo36	6.67911290786337e-63	0.487851629497219	0.572	0.275	1.43687755986865e-58	S-TGC	Fbxo36
Gpbp1	9.1844905011456e-63	0.327904295526792	0.312	0.093	1.97585944151145e-58	S-TGC	Gpbp1
Slc44a2	2.18084872750098e-62	0.436742938716796	0.487	0.203	4.69165986747285e-58	S-TGC	Slc44a2
Mapk9	2.53863946631867e-62	0.353901959663987	0.288	0.082	5.46137508389135e-58	S-TGC	Mapk9
Fam3c	2.76356744705761e-62	0.386842402614952	0.434	0.165	5.94526264885503e-58	S-TGC	Fam3c
Pip5k1c	2.91847896910127e-62	0.354543848857855	0.27	0.073	6.27852380622756e-58	S-TGC	Pip5k1c
Auts2	4.26835517317065e-62	0.569138885431156	0.921	0.8	9.18251248404202e-58	S-TGC	Auts2
Slc15a2	4.41588300369374e-62	0.424212634550295	0.386	0.139	9.49988910584635e-58	S-TGC	Slc15a2
Gm37168	9.8500621846416e-62	0.351836957792122	0.371	0.126	2.11904387778195e-57	S-TGC	Gm37168
Tmod3	1.15339115778228e-61	0.426745524833013	0.71	0.393	2.48129039773701e-57	S-TGC	Tmod3
Serf2	1.22092716055282e-61	0.371742094377812	0.409	0.15	2.62658060049727e-57	S-TGC	Serf2
Elmsan11	1.79545584981929e-61	0.375794911969902	0.64	0.307	3.86256416971624e-57	S-TGC	Elmsan1
Cntln	1.81799471913664e-61	0.33581442410316	0.265	0.07	3.91105203927865e-57	S-TGC	Cntln
Kpna4	1.85882199311853e-61	0.453061680625029	0.68	0.368	3.99888375379589e-57	S-TGC	Kpna4
Pola1	2.75916771869444e-61	0.590130139510747	0.293	0.09	5.93579751322734e-57	S-TGC	Pola1
Smarcad1	3.1989561836137e-61	0.413577360709585	0.545	0.249	6.88191443780815e-57	S-TGC	Smarcad1
Osbpl10	4.83104823781266e-61	0.517707188220887	0.448	0.183	1.03930340740064e-56	S-TGC	Osbpl10
Nptn	7.74155119048882e-61	0.415706675972723	0.534	0.241	1.66543990760986e-56	S-TGC	Nptn
Rere	5.52852381124215e-60	0.264432974739798	0.994	0.954	1.18935132751252e-55	S-TGC	Rere
Cdc40	1.3211411072983e-59	0.371374235001075	0.445	0.175	2.84217086413083e-55	S-TGC	Cdc40
Fars2	2.12132283736204e-59	0.401481628190001	0.898	0.646	4.56360182001696e-55	S-TGC	Fars2
Lcmt1	4.45615630732021e-59	0.334319520455501	0.278	0.079	9.58652906393798e-55	S-TGC	Lcmt1
Kif1c	1.34925220897199e-58	0.378330631491781	0.531	0.235	2.90264627716144e-54	S-TGC	Kif1c
Mark2	1.70211245197955e-58	0.427538822288825	0.786	0.479	3.66175451794361e-54	S-TGC	Mark2
Palld	2.29090845835391e-58	0.361640191812575	0.377	0.135	4.92843136645677e-54	S-TGC	Palld
Ccdc6	2.52417704187402e-58	0.441576365038873	0.547	0.257	5.43026207018359e-54	S-TGC	Ccdc6
Tacc11	2.54628933138301e-58	0.315488086317593	0.591	0.267	5.47783223860427e-54	S-TGC	Tacc1
Rnf115	2.87709288543066e-58	0.422804947025951	0.461	0.196	6.18948992442698e-54	S-TGC	Rnf115
Cdk14	3.21061460133836e-58	0.470482531410932	0.897	0.707	6.90699519185921e-54	S-TGC	Cdk14
Svep1	3.42603725919635e-58	0.384602249171805	0.288	0.086	7.37043395570912e-54	S-TGC	Svep1
Gdpd5	5.10169539451848e-58	0.409491736659634	0.576	0.272	1.09752773022276e-53	S-TGC	Gdpd5
Taf1d	5.5569578496296e-58	0.415144415743107	0.508	0.223	1.19546834219082e-53	S-TGC	Taf1d
Smad7	6.04292571120375e-58	0.451262227874251	0.481	0.211	1.30001460825126e-53	S-TGC	Smad7
Itga31	7.07973798187111e-58	0.266142541198882	0.432	0.159	1.52306403203993e-53	S-TGC	Itga3
Sap130	8.21759460408199e-58	0.431457110075337	0.635	0.335	1.76785112717616e-53	S-TGC	Sap130
Kdm5b	1.06858515343289e-57	0.437742996764586	0.603	0.311	2.29884724058018e-53	S-TGC	Kdm5b
Nadk	1.93992772318834e-57	0.362643229199424	0.512	0.224	4.17336651089508e-53	S-TGC	Nadk
Nav21	3.39261313975685e-57	0.425361609131527	0.447	0.183	7.29852864755891e-53	S-TGC	Nav2
Chpt1	4.51332287320781e-57	0.474751370933194	0.54	0.268	9.70951149713195e-53	S-TGC	Chpt1
Fchsd2	9.51680062517696e-57	0.385233267958356	0.904	0.701	2.04734931849432e-52	S-TGC	Fchsd2
9030624G23Rik	1.02068072369407e-56	0.382067192418509	0.553	0.257	2.19579044088304e-52	S-TGC	9030624G23Rik
Cwc27	2.35802613766393e-56	0.366078769119247	0.54	0.246	5.07282162995641e-52	S-TGC	Cwc27
Exoc4	5.42896066516577e-56	0.40426915264195	0.941	0.804	1.16793230789711e-51	S-TGC	Exoc4
Serinc5	5.7612068066745e-56	0.384890954119516	0.37	0.137	1.23940842031988e-51	S-TGC	Serinc5
Abi1	9.81964399780279e-56	0.412771508915923	0.735	0.439	2.11250001324731e-51	S-TGC	Abi1
Ets2	2.31286669264397e-55	0.348598191983057	0.432	0.171	4.97567011588498e-51	S-TGC	Ets2
Spata5	2.78495841980211e-55	0.439835111614206	0.566	0.284	5.99128104852027e-51	S-TGC	Spata5
Nsd3	4.97669255608635e-55	0.350709142304759	0.913	0.747	1.07063586959086e-50	S-TGC	Nsd3
Arrb1	8.59572176830426e-55	0.401544537527859	0.374	0.142	1.8491976240153e-50	S-TGC	Arrb1
Egfr1	1.50041894057756e-54	0.371335920459924	0.391	0.147	3.2278512668645e-50	S-TGC	Egfr
St3gal3	1.60283077716509e-54	0.366752050638052	0.374	0.139	3.44816985091527e-50	S-TGC	St3gal3
Plxna4	1.87663248788883e-54	0.962995159135493	0.491	0.274	4.03719947119523e-50	S-TGC	Plxna4
Pcmt1	1.9965082795978e-54	0.378828051182583	0.465	0.202	4.29508826189874e-50	S-TGC	Pcmt1
Sulf2	2.35194722143701e-54	0.326296314054967	0.256	0.073	5.05974405747745e-50	S-TGC	Sulf2
Smad5	2.42839139511853e-54	0.331804097076487	0.364	0.131	5.2241984083185e-50	S-TGC	Smad5
Rmdn3	4.74713971465596e-54	0.322907936656292	0.381	0.141	1.02125216681394e-49	S-TGC	Rmdn3
St3gal1	5.15781594302237e-54	0.356260635057983	0.302	0.1	1.1096009438224e-49	S-TGC	St3gal1
Iqcb1	5.99602203554885e-54	0.352856674849618	0.312	0.105	1.28992422050762e-49	S-TGC	Iqcb1
Dock4	1.08246185527059e-53	0.375693609763192	0.37	0.14	2.32870018924361e-49	S-TGC	Dock4
Bzw2	1.11188904432099e-53	0.310573170628644	0.271	0.081	2.39200690104774e-49	S-TGC	Bzw2
Sdcbp	2.40817983541045e-53	0.337082552809156	0.312	0.105	5.18071727991851e-49	S-TGC	Sdcbp
Slc10a7	7.51632083826155e-53	0.390014415247647	0.665	0.362	1.61698610193521e-48	S-TGC	Slc10a7
Dsp	1.07422175719345e-52	0.385904112611562	0.855	0.6	2.31097326625027e-48	S-TGC	Dsp
Rbm25	1.1585841686155e-52	0.349592940826426	0.982	0.905	2.49246212194252e-48	S-TGC	Rbm25
Zwint	1.7569185026579e-52	0.383854648962314	0.602	0.307	3.77965877476794e-48	S-TGC	Zwint
Rab40c	2.15057433324838e-52	0.402255274161123	0.68	0.39	4.62653056311724e-48	S-TGC	Rab40c
Cxxc5	2.85815783715382e-52	0.359144032584254	0.464	0.2	6.14875495506901e-48	S-TGC	Cxxc5
Purb	3.58921282870416e-52	0.337776160325717	0.393	0.154	7.72147355839127e-48	S-TGC	Purb
Shq1	3.95821833165834e-52	0.316807566412108	0.271	0.083	8.51531509689659e-48	S-TGC	Shq1
Klhl26	4.22110788972756e-52	0.399921111253277	0.584	0.289	9.08086940317091e-48	S-TGC	Klhl26
Camta2	5.32709278556287e-52	0.377863359606414	0.437	0.186	1.14601747095814e-47	S-TGC	Camta2
Fam20b	7.55226185698859e-52	0.296843536384196	0.306	0.101	1.62471809329395e-47	S-TGC	Fam20b
Wdr621	8.91708062423805e-52	0.34611853116761	0.46	0.198	1.91833155469233e-47	S-TGC	Wdr62
Tecpr2	9.1276443726876e-52	0.370379596114717	0.474	0.211	1.96363013389628e-47	S-TGC	Tecpr2
Cdyl	1.44390024098554e-51	0.419718965868736	0.779	0.512	3.1062625884322e-47	S-TGC	Cdyl
Kctd17	1.97366733086247e-51	0.312882424525208	0.348	0.126	4.24595052888443e-47	S-TGC	Kctd17
Smad11	2.27892931384724e-51	0.446134331578907	0.363	0.142	4.90266063287957e-47	S-TGC	Smad1
Acox1	2.43024403252967e-51	0.419387410206402	0.607	0.323	5.22818398718107e-47	S-TGC	Acox1
Cited1	3.16928211553141e-51	0.366936658460215	0.284	0.091	6.81807661514272e-47	S-TGC	Cited1
Itgb3	4.55772861549219e-51	0.307018332183406	0.274	0.086	9.80504157050835e-47	S-TGC	Itgb3
Braf	4.62727844496501e-51	0.40517319946165	0.844	0.622	9.95466411865324e-47	S-TGC	Braf
Ccdc88a	5.87031766337121e-51	0.305210504215912	0.329	0.116	1.26288143892105e-46	S-TGC	Ccdc88a
Srgap3	5.89772897593864e-51	0.366684364904002	0.964	0.792	1.26877843459368e-46	S-TGC	Srgap3
Ptpn11	1.40447150491076e-50	0.337423788572357	0.506	0.231	3.02143954851451e-46	S-TGC	Ptpn11
Appl1	2.46384966762821e-50	0.376807815641383	0.512	0.239	5.30047978996856e-46	S-TGC	Appl1
Cttnbp2nl1	2.68013725424386e-50	0.312429045257364	0.396	0.158	5.76577927505482e-46	S-TGC	Cttnbp2nl
Coq2	5.74808411282144e-50	0.311894372991511	0.28	0.091	1.23658533519128e-45	S-TGC	Coq2
Retreg3	7.40381040684944e-50	0.295633483896414	0.35	0.13	1.59278173282552e-45	S-TGC	Retreg3
Rcor3	8.95717313343556e-50	0.318392696032632	0.328	0.118	1.92695665619599e-45	S-TGC	Rcor3
Rela	1.01938157225626e-49	0.292389852953879	0.279	0.089	2.1929955763949e-45	S-TGC	Rela
Tango6	2.45751957459549e-49	0.389433006322268	0.283	0.096	5.28686186082729e-45	S-TGC	Tango6
Lrrc4	2.99870225286866e-49	0.338947499833738	0.39	0.157	6.45110815659635e-45	S-TGC	Lrrc4
Tns2	3.43973579720059e-49	0.264072876908835	0.299	0.1	7.39990362051763e-45	S-TGC	Tns2
Mgat4b	5.32016872709371e-49	0.337953631488396	0.439	0.189	1.14452789825967e-44	S-TGC	Mgat4b
Zfp948	6.29806925405524e-49	0.312366876907258	0.326	0.117	1.3549036386249e-44	S-TGC	Zfp948
Mras1	1.0798979667037e-48	0.312662128284935	0.34	0.126	2.32318449576967e-44	S-TGC	Mras
Prom1	1.27718518763084e-48	0.333916859330465	0.282	0.095	2.74760849415023e-44	S-TGC	Prom1
Dvl1	2.19768041195449e-48	0.315774388245038	0.393	0.158	4.72786987023768e-44	S-TGC	Dvl1
Pex1	2.32598300456263e-48	0.350732399442657	0.473	0.214	5.00388723771559e-44	S-TGC	Pex1
Rpl6	4.43040221078314e-48	0.340244573166793	0.339	0.128	9.53112427605778e-44	S-TGC	Rpl6
Meis1	4.82204802431353e-48	0.367390534543016	0.419	0.181	1.03736719147057e-43	S-TGC	Meis1
Galnt1	5.08528849365494e-48	0.371831426233339	0.502	0.24	1.09399811363999e-43	S-TGC	Galnt1
Sos1	5.93185501756454e-48	0.397654256060737	0.54	0.273	1.27611996992866e-43	S-TGC	Sos1
Taf3	2.45329500422644e-47	0.343476775465846	0.449	0.198	5.27777354259233e-43	S-TGC	Taf3
Plcg1	3.52830036077494e-47	0.372790614259993	0.553	0.281	7.59043256613513e-43	S-TGC	Plcg1
Tcte2	3.81248192158746e-47	0.321529457869875	0.334	0.126	8.20179235791111e-43	S-TGC	Tcte2
Xylb	3.90679035037485e-47	0.260434037840457	0.28	0.093	8.40467808076142e-43	S-TGC	Xylb
Ric8b	4.01074845026388e-47	0.316187137055412	0.311	0.113	8.62832314105269e-43	S-TGC	Ric8b
Tanc2	5.01887186832443e-47	0.502496331430383	0.891	0.72	1.07970990503263e-42	S-TGC	Tanc2
Prune2	6.1224280751408e-47	0.592474976060166	0.578	0.328	1.31711795180504e-42	S-TGC	Prune2
Srsf4	6.36509060303562e-47	0.325167138693068	0.419	0.182	1.36932194143105e-42	S-TGC	Srsf4
Bbs9	1.25515781588545e-46	0.341718315916078	0.448	0.201	2.70022100931436e-42	S-TGC	Bbs9
Pcbp3	1.91393294123563e-46	0.362713443382874	0.263	0.086	4.1174439364802e-42	S-TGC	Pcbp3
Fam102a	3.50478654356096e-46	0.273886987752053	0.28	0.094	7.53984729116269e-42	S-TGC	Fam102a
Cbx5	3.50681789948007e-46	0.432622772106151	0.426	0.196	7.54421734715147e-42	S-TGC	Cbx5
Adgrg3	3.95894536821194e-46	0.27771811067665	0.251	0.078	8.51687917063434e-42	S-TGC	Adgrg3
Sp1	4.02423731168512e-46	0.30212694742876	0.371	0.149	8.65734172862821e-42	S-TGC	Sp1
Spata6	4.58005179036394e-46	0.289866862496303	0.264	0.086	9.85306541660995e-42	S-TGC	Spata6
Baz1b	7.13570499846764e-46	0.356518331557031	0.584	0.313	1.53510421632034e-41	S-TGC	Baz1b
Gigyf2	1.82927788356049e-45	0.319616017797215	0.914	0.755	3.93532551090368e-41	S-TGC	Gigyf2
Sdccag8	1.95722853571497e-45	0.387840783606687	0.593	0.328	4.21058574888362e-41	S-TGC	Sdccag8
Bmpr1a	3.69865694980805e-45	0.377926728667139	0.61	0.339	7.95692069612207e-41	S-TGC	Bmpr1a
Rps6ka2	4.03707272553884e-45	0.361610369061849	0.312	0.117	8.6849545544517e-41	S-TGC	Rps6ka2
Ccny	4.08867257000995e-45	0.374058101152746	0.788	0.547	8.7959612998624e-41	S-TGC	Ccny
Ctnnbip1	4.14658629558054e-45	0.3487099536798	0.53	0.262	8.92055109768241e-41	S-TGC	Ctnnbip1
Numb	4.27111104156213e-45	0.337355015353987	0.933	0.766	9.18844118371262e-41	S-TGC	Numb
Uhrf2	5.64980077949533e-45	0.343567103723319	0.427	0.191	1.21544164169283e-40	S-TGC	Uhrf2
Vcpip1	6.5137013210899e-45	0.350828506929046	0.521	0.262	1.40129256520607e-40	S-TGC	Vcpip1
Dph6	7.07394626957248e-45	0.320740609132744	0.392	0.169	1.52181806097313e-40	S-TGC	Dph6
Eva1a	9.05746301019167e-45	0.398160580389735	0.563	0.304	1.94853201738253e-40	S-TGC	Eva1a
Nt5dc1	9.8238829210611e-45	0.320173538386152	0.417	0.184	2.11341193280787e-40	S-TGC	Nt5dc1
Klhl20	1.3624127458308e-44	0.255430793830671	0.279	0.095	2.93095854010579e-40	S-TGC	Klhl20
Jmjd1c	2.2003076937367e-44	0.36004244544619	0.841	0.611	4.73352194153576e-40	S-TGC	Jmjd1c
Heatr5a	2.32759207508745e-44	0.408125188024087	0.366	0.153	5.00734883113562e-40	S-TGC	Heatr5a
Mid1	4.06958964009611e-44	0.491568522598756	0.656	0.395	8.75490819273877e-40	S-TGC	Mid1
1110059E24Rik	4.53718458975027e-44	0.323326693039922	0.344	0.138	9.76084520792976e-40	S-TGC	1110059E24Rik
Wwox	4.69979405465216e-44	0.432319740128223	0.815	0.56	1.01106669497732e-39	S-TGC	Wwox
Bmpr2	6.28215817872124e-44	0.376183096565835	0.738	0.49	1.3514806889883e-39	S-TGC	Bmpr2
Marcks	8.88158311490958e-44	0.297476057001143	0.279	0.098	1.9106949755105e-39	S-TGC	Marcks
Atrn	1.26053478365422e-43	0.376922045161362	0.565	0.309	2.71178848007532e-39	S-TGC	Atrn
Anp32b	1.31236189537815e-43	0.294258434840078	0.419	0.183	2.82328414552701e-39	S-TGC	Anp32b
Plxdc2	1.42886061225777e-43	0.327739061347639	0.271	0.093	3.07390783515014e-39	S-TGC	Plxdc2
Pcgf3	1.43691899496448e-43	0.332812264923818	0.428	0.196	3.09124383386709e-39	S-TGC	Pcgf3
Setd4	1.50048412456912e-43	0.260235596004854	0.252	0.082	3.22799149718555e-39	S-TGC	Setd4
Chic2	1.52195219626536e-43	0.317938908634533	0.4	0.173	3.27417575982568e-39	S-TGC	Chic2
Slc9a8	1.89433329075936e-43	0.306352999349169	0.494	0.232	4.0752792084106e-39	S-TGC	Slc9a8
4921524J17Rik	1.92586061131132e-43	0.30031351917925	0.436	0.197	4.14310393311405e-39	S-TGC	4921524J17Rik
Xrcc4	2.67895916773093e-43	0.358116770222221	0.436	0.202	5.76324485753956e-39	S-TGC	Xrcc4
Stx12	3.82649618839369e-43	0.330533798588003	0.457	0.216	8.23194125009134e-39	S-TGC	Stx12
Fam46a	8.76081208022756e-43	0.330691156972459	0.295	0.11	1.88471350281935e-38	S-TGC	Fam46a
Dcun1d1	1.20861451843119e-42	0.311943116329777	0.361	0.15	2.60009241350102e-38	S-TGC	Dcun1d1
Jarid2	1.50752526864731e-42	0.325227956606687	0.929	0.772	3.24313911044096e-38	S-TGC	Jarid2
CAAA01118383.1	1.93826229292077e-42	0.301507524353885	0.349	0.141	4.16978367076046e-38	S-TGC	CAAA01118383.1
Gpat41	1.94322869954332e-42	0.250895561081641	0.334	0.13	4.18046790132753e-38	S-TGC	Gpat4
Mthfd1l	2.41733047369047e-42	0.453927267458924	0.273	0.103	5.20040304805032e-38	S-TGC	Mthfd1l
Lmtk2	2.81530056821068e-42	0.428762342598649	0.682	0.454	6.05655611239164e-38	S-TGC	Lmtk2
Jup	2.94802275646585e-42	0.340443361294619	0.715	0.439	6.34208135598499e-38	S-TGC	Jup
Dmd	5.54363543487097e-42	0.271335376881643	0.258	0.088	1.19260229110379e-37	S-TGC	Dmd
Lcor	5.8398762027179e-42	0.358861671989679	0.868	0.654	1.2563325674907e-37	S-TGC	Lcor
Ahcyl1	1.56040636926074e-41	0.29493207059455	0.379	0.164	3.35690222219063e-37	S-TGC	Ahcyl1
Prkca	1.59661677035356e-41	0.352744365800457	0.541	0.285	3.43480165806161e-37	S-TGC	Prkca
Zfp64	1.62576756287234e-41	0.352671288181962	0.537	0.28	3.49751375800727e-37	S-TGC	Zfp64
Sgpp2	1.78419282150462e-41	0.372116328355167	0.357	0.153	3.83833401690289e-37	S-TGC	Sgpp2
Pdlim2	1.9798236384618e-41	0.271281919945187	0.283	0.103	4.25919459342286e-37	S-TGC	Pdlim2
Xpo7	4.7404741054896e-41	0.412096919053825	0.569	0.322	1.01981819431398e-36	S-TGC	Xpo7
Cep85l	6.70432763708543e-41	0.278376134901815	0.334	0.134	1.44230200456619e-36	S-TGC	Cep85l
Sqstm1	1.18945792392723e-40	0.286266316863248	0.451	0.21	2.55888083174465e-36	S-TGC	Sqstm1
Elp4	1.91770059209375e-40	0.326614468255871	0.509	0.258	4.12554928377128e-36	S-TGC	Elp4
Mms22l	2.18164262893246e-40	0.359197075363531	0.253	0.09	4.69336778762239e-36	S-TGC	Mms22l
Cep83	2.86652892591485e-40	0.283000477997078	0.292	0.111	6.16676367832062e-36	S-TGC	Cep83
Gle1	3.15637105065742e-40	0.306846875228067	0.381	0.167	6.79030104127931e-36	S-TGC	Gle1
Gm26624	4.12080054916819e-40	0.328843753474519	0.428	0.201	8.86507822142553e-36	S-TGC	Gm26624
Trpc4ap	4.76141366693135e-40	0.325176138096188	0.638	0.365	1.02432292216694e-35	S-TGC	Trpc4ap
Rbbp8	5.88732398988595e-40	0.331054993403387	0.421	0.196	1.26654000994416e-35	S-TGC	Rbbp8
Cln3	7.20206770358695e-40	0.320281403203283	0.553	0.299	1.54938082507266e-35	S-TGC	Cln3
Edc4	8.73250284177475e-40	0.290874104825123	0.363	0.157	1.878623336351e-35	S-TGC	Edc4
Gata3	1.26019937100462e-39	0.329186064989895	0.538	0.285	2.71106690684224e-35	S-TGC	Gata3
Zc3h15	1.3794375447827e-39	0.311089142046805	0.48	0.236	2.96758399009102e-35	S-TGC	Zc3h15
Sec11a	1.40354286667527e-39	0.306804729830906	0.427	0.2	3.01944176907851e-35	S-TGC	Sec11a
Cep128	1.61643748929217e-39	0.362702348966914	0.277	0.106	3.47744197071425e-35	S-TGC	Cep128
Adck5	1.73252338305082e-39	0.257283328574292	0.324	0.128	3.72717755395724e-35	S-TGC	Adck5
Ldha	2.31058887446181e-39	0.267160963495249	0.335	0.135	4.97076984562968e-35	S-TGC	Ldha
Efr3a	2.50725363999042e-39	0.287924908805171	0.446	0.212	5.39385475571139e-35	S-TGC	Efr3a
Dym	2.8989034151197e-39	0.312170219503799	0.571	0.31	6.23641091694702e-35	S-TGC	Dym
Arhgef7	2.92518440186018e-39	0.414601141888438	0.323	0.138	6.29294920372181e-35	S-TGC	Arhgef7
Srbd1	3.33703769431597e-39	0.32347532856864	0.437	0.212	7.17896919178195e-35	S-TGC	Srbd1
Plekhg2	3.44617494914405e-39	0.362600209638246	0.586	0.335	7.4137561680936e-35	S-TGC	Plekhg2
Mtmr2	4.11853681982946e-39	0.327400461650869	0.367	0.163	8.86020826049911e-35	S-TGC	Mtmr2
Smc6	4.90920310464916e-39	0.30587804551333	0.59	0.324	1.05611686390317e-34	S-TGC	Smc6
R3hcc1l	5.53083397838137e-39	0.29412663439346	0.459	0.221	1.18984831376918e-34	S-TGC	R3hcc1l
Aida	5.68217304261752e-39	0.256454250006656	0.291	0.11	1.22240588665831e-34	S-TGC	Aida
Map4	7.23977699471931e-39	0.322866999783034	0.865	0.668	1.55749322487397e-34	S-TGC	Map4
Smc3	1.28874816315454e-38	0.315404755651148	0.497	0.252	2.77248392339436e-34	S-TGC	Smc3
Crk	1.3768939154861e-38	0.312805037666711	0.586	0.326	2.96211188038524e-34	S-TGC	Crk
Paxbp1	1.44538526871537e-38	0.30564441407782	0.44	0.211	3.10945732858738e-34	S-TGC	Paxbp1
Pitrm1	1.69697768000366e-38	0.252245124899743	0.383	0.168	3.65070808299187e-34	S-TGC	Pitrm1
Rbm15	2.0021740246152e-38	0.262124175705244	0.256	0.092	4.30727697915467e-34	S-TGC	Rbm15
Hjurp	2.04636976011195e-38	0.288347846177299	0.368	0.161	4.40235526492884e-34	S-TGC	Hjurp
Chd1	2.81793579918806e-38	0.293716099551948	0.428	0.203	6.06222528479326e-34	S-TGC	Chd1
Scap	3.12818004018958e-38	0.276954029067778	0.436	0.207	6.72965372045985e-34	S-TGC	Scap
Polr3c	4.06192927518351e-38	0.267082103546782	0.351	0.149	8.73842844970229e-34	S-TGC	Polr3c
Syne1	5.00580281676234e-38	0.306923879353613	0.257	0.094	1.07689835997008e-33	S-TGC	Syne1
Ehd4	1.98527356518587e-37	0.272232908274199	0.338	0.143	4.27091902078436e-33	S-TGC	Ehd4
Oxr1	2.25846736156598e-37	0.306646876907326	0.465	0.23	4.85864083493689e-33	S-TGC	Oxr1
Pde8a1	2.28645535304203e-37	0.275471520452459	0.471	0.234	4.91885140099933e-33	S-TGC	Pde8a
Faf1	2.55181985076403e-37	0.339764201539779	0.799	0.57	5.48973004494867e-33	S-TGC	Faf1
Fer1	2.5529248831338e-37	0.303890874206885	0.563	0.307	5.49210730108573e-33	S-TGC	Fer
Cpeb4	2.82373517465373e-37	0.283368163609483	0.525	0.275	6.07470148123258e-33	S-TGC	Cpeb4
Gramd1a	3.23252177624658e-37	0.280818940136348	0.558	0.297	6.95412409723927e-33	S-TGC	Gramd1a
Ube3a	6.30554865397566e-37	0.328739803983967	0.575	0.329	1.35651268192978e-32	S-TGC	Ube3a
Ppp1r13b	6.49390140818802e-37	0.389051583396188	0.46	0.24	1.39703300994349e-32	S-TGC	Ppp1r13b
Tead2	1.39891778876565e-36	0.282502186886239	0.374	0.167	3.00949183897154e-32	S-TGC	Tead2
Fam222b	1.4274580158268e-36	0.300687750293585	0.496	0.255	3.0708904294482e-32	S-TGC	Fam222b
Phf21a	1.67195237854806e-36	0.352524442320724	0.682	0.429	3.59687115197043e-32	S-TGC	Phf21a
Caprin1	1.96731637849389e-36	0.321272485128168	0.692	0.434	4.2322877250539e-32	S-TGC	Caprin1
Ttc19	2.45197823059927e-36	0.297732295380708	0.459	0.233	5.2749407674882e-32	S-TGC	Ttc19
Ywhab	2.52437002453294e-36	0.288188383600684	0.364	0.163	5.4306772337777e-32	S-TGC	Ywhab
Ptpn9	3.39777628065895e-36	0.280729816377368	0.529	0.285	7.3096361125816e-32	S-TGC	Ptpn9
Brms1l	5.34344214270223e-36	0.26506006815379	0.492	0.248	1.14953470815953e-31	S-TGC	Brms1l
Rpn2	5.40594567740415e-36	0.28061283918145	0.381	0.175	1.16298109357995e-31	S-TGC	Rpn2
Carm1	5.52481494628351e-36	0.310245434708242	0.587	0.335	1.18855343939397e-31	S-TGC	Carm1
Plaa	7.1024182111666e-36	0.304986941109837	0.465	0.239	1.52794322976827e-31	S-TGC	Plaa
Dnajc1	7.68071856089159e-36	0.310289861389849	0.716	0.466	1.65235298400461e-31	S-TGC	Dnajc1
Pitpna1	7.69884637570787e-36	0.307153119094241	0.581	0.331	1.65625282080604e-31	S-TGC	Pitpna
Abcc5	7.79731491452466e-36	0.312170015136454	0.388	0.185	1.67743635756169e-31	S-TGC	Abcc5
Cast1	1.1185066908049e-35	0.291797388408308	0.659	0.405	2.40624344392859e-31	S-TGC	Cast
Xpo1	1.17328416650103e-35	0.330864040612606	0.689	0.428	2.52408622739367e-31	S-TGC	Xpo1
Pura1	1.59019214476435e-35	0.251993669936794	0.52	0.274	3.42098036103155e-31	S-TGC	Pura
Dgat1	1.65435866356145e-35	0.271318066142178	0.438	0.214	3.55902179291975e-31	S-TGC	Dgat1
Atf2	2.09681516391181e-35	0.272641986304722	0.546	0.294	4.51087846212347e-31	S-TGC	Atf2
[truncated: 105 more rows]
