# Supplementary material for: Single nuclei RNA-seq of mouse placental labyrinth development
Source: eLife. 2020 Nov 3;9:e60266. doi: 10.7554/eLife.60266 (PMC7669270; doi:10.7554/eLife.60266)
Supplement: Figure 4—source data 2. [file elife-60266-fig4-data2.xlsx]

## Sheet: STGC.GO.up
	ID	Description	GeneRatio	BgRatio	pvalue	p.adjust	qvalue	geneID	Count
GO:0007264	GO:0007264	small GTPase mediated signal transduction	59/842	485/23210	3.6822e-16	1.80501e-12	1.38528e-12	Dock5/Ntn1/Psd3/Arhgap28/Arhgap18/Arhgef25/Farp1/Dock9/Dock7/Cdc42bpa/Sipa1l1/Dock8/Notch2/Vav2/Fgd6/Rasal1/Prex1/Pdgfrb/Wasf1/Heg1/Grb2/Arhgef2/Rgl2/Cgnl1/Sipa1l2/Kras/Rab6b/Rapgef1/Bcar3/Dock1/Ksr1/Map2k1/Ralgps2/Dlc1/Ogt/Rapgef5/Cyth3/Ripor1/Ralgapa2/Shoc2/Bcl6/Rassf1/Arhgap31/Gna12/Auts2/Itga3/Arrb1/Dock4/Sdcbp/Rab40c/Mras/Sos1/Arhgef7/Plekhg2/Crk/Src/Wasf2/Dbnl/Rap1a	59
GO:0034330	GO:0034330	cell junction organization	37/842	255/23210	6.5799e-13	1.16458e-09	8.9377e-10	Prkch/Dst/Cdh5/Fn1/Grhl2/Cdh24/Heg1/Nedd4l/Pkp2/Plec/Pxn/Coro1c/Esam/Acvrl1/Ptk2/Lims1/Pkp4/Fscn1/Rapgef1/Ptprj/Arvcf/Dlc1/Sorbs1/Rdx/Afdn/Phldb2/Smad7/Dsp/Itgb3/Numb/Jup/Prkca/Src/Pkn2/Pten/Rap1a/Ccm2	37
GO:0034329	GO:0034329	cell junction assembly	33/842	206/23210	7.12715e-13	1.16458e-09	8.9377e-10	Prkch/Dst/Cdh5/Fn1/Grhl2/Cdh24/Heg1/Nedd4l/Pkp2/Plec/Pxn/Coro1c/Esam/Acvrl1/Ptk2/Lims1/Pkp4/Fscn1/Rapgef1/Ptprj/Arvcf/Dlc1/Sorbs1/Afdn/Phldb2/Smad7/Itgb3/Jup/Prkca/Src/Pkn2/Pten/Rap1a	33
GO:0001667	GO:0001667	ameboidal-type cell migration	47/842	406/23210	2.43676e-12	2.389e-09	1.83347e-09	Dock5/Sema3e/Gab2/Kit/Fn1/Pik3c2a/Prkce/Pparg/Map2k5/Pxn/Srgap2/Prcp/Coro1c/Acvrl1/Ptk2/Sparc/Nr2f2/Acvr1/Ppard/Ptp4a3/Jcad/Dock1/Prl7d1/Tgfbr3/Sema3f/Sash1/Map3k3/Myh9/Gna12/Itga3/Itgb3/Braf/Ptpn11/Appl1/Plcg1/Sp1/Bmpr2/Jup/Prkca/Gata3/Fer/Src/Wasf2/Pkn2/Hif1a/Akt3/Pten	47
GO:0001890	GO:0001890	placenta development	26/842	170/23210	5.54405e-10	2.47063e-07	1.89612e-07	Hsd17b2/Notch2/Grhl2/Pparg/Epas1/Grb2/Arid1a/Nrk/Senp2/Hand1/Nr2f2/Ppard/Map2k1/Fbxw8/Stk3/E2f7/Rxra/Egfr/Cited1/Sp1/Bmpr2/Rbm15/Hif1a/Sp3/Hsf1/Xist	26
GO:0043087	GO:0043087	regulation of GTPase activity	35/842	295/23210	8.14213e-10	3.07021e-07	2.35627e-07	Chn2/Dock9/Dock7/Sipa1l1/Dock8/Vav2/Fgd6/Rasal1/Prex1/Gnas/Rgma/F11r/Srgap2/Coro1c/Adap2/Rabgap1l/Rap1gds1/Lims1/Pkp4/Tbc1d8/Rapgef1/Wnk1/Map2k1/Usp6nl/Rdx/Tbc1d5/Afdn/Ralgapa2/Bcl6/Arrb1/Plxna4/Arhgef7/Crk/Picalm/Rap1a	35
GO:0016569	GO:0016569	covalent chromatin modification	44/842	444/23210	1.8694e-09	6.54558e-07	5.0235e-07	Rcor1/Dnmt3a/Usp3/Atrx/Ube2a/Nsd2/Phc1/Jdp2/Tbl1x/Trrap/Ogt/Brd7/Fmr1/Mta3/Phf8/Brpf1/Rnf2/Bcl6/Smyd2/Trip12/Auts2/Smarcad1/Kdm5b/Nsd3/Arrb1/Baz1b/Jmjd1c/Pcgf3/Jarid2/Prkca/Gata3/Paxbp1/Chd1/Brms1l/Carm1/Crebbp/Wac/Naa40/Brd1/Phf2/Baz2a/Cul4b/Rybp/Taf1	44
GO:0003013	GO:0003013	circulatory system process	45/842	495/23210	1.74998e-08	3.89928e-06	2.99255e-06	Chd7/Dock5/Mgll/Pik3r1/Atp2b1/Cdh5/Fyn/Rnpep/Pparg/Heg1/Gnas/Epas1/Nedd4l/Pkp2/Mef2a/F11r/Prcp/Acvrl1/Ptk2/Rap1gds1/Nr2f2/Ppard/Nos2/Ptp4a3/Ptprj/Wnk1/Map2k1/Tgfbr3/Stk39/Dsc2/Grk2/Smad7/Nav2/Egfr/Smad5/Dock4/Dsp/Rps6ka2/Ctnnbip1/Bmpr2/Jup/Dmd/Prkca/Src/Hif1a	45
GO:0010810	GO:0010810	regulation of cell-substrate adhesion	26/842	211/23210	5.6107e-08	9.82273e-06	7.53858e-06	Dock5/Sema3e/Pik3r1/Prex1/Fn1/Prkce/Plekha2/Plet1/Nid1/Coro1c/Acvrl1/Ptk2/Lims1/Ptprj/Dock1/Dlc1/Bcl6/Phldb2/Itga3/Itgb3/Braf/Jup/Dmd/Crk/Src/Pten	26
GO:0099173	GO:0099173	postsynapse organization	24/842	194/23210	1.67642e-07	2.34795e-05	1.80196e-05	Tanc1/Farp1/Tmem108/Eef2k/Sipa1l1/Fyn/Arhgap22/Adam10/Sorbs1/Afdn/Sema3f/Myh10/Itga3/Lrrc4/Dvl1/Numb/Arhgef7/Mtmr2/Ube3a/Caprin1/Wasf2/Dbnl/Pten/Gphn	24
GO:0120031	GO:0120031	plasma membrane bounded cell projection assembly	40/842	488/23210	1.57604e-06	0.000116213	8.91894e-05	Ntn1/Snx10/Podxl/Kit/Vav2/Myo10/Palm/Dnaic1/Rfx3/Pxn/Srgap2/Unc119b/Coro1c/Tapt1/Fscn1/Fmr1/Rdx/Ezr/Myh10/Cep164/Rab3ip/Arl13b/Auts2/Iqcb1/Kctd17/Ccdc88a/Bbs9/Spata6/Sdccag8/Cep83/Cln3/Arhgef7/Map4/Syne1/Fer/Apc/Wasf2/Sept9/Dbnl/Nck2	40
GO:0120032	GO:0120032	regulation of plasma membrane bounded cell projection assembly	21/842	182/23210	3.04836e-06	0.000182233	0.000139857	Podxl/Kit/Myo10/Palm/Coro1c/Tapt1/Fscn1/Fmr1/Rdx/Rab3ip/Auts2/Kctd17/Ccdc88a/Sdccag8/Cln3/Map4/Syne1/Fer/Apc/Wasf2/Sept9	21
GO:0051656	GO:0051656	establishment of organelle localization	37/842	473/23210	1.11033e-05	0.000490345	0.000376322	Apba1/Ntn1/Gab2/Kit/Dock7/Cdc42bpa/Map1b/Fam83d/Insc/Wasf1/Prkce/Arhgef2/Ptk2/Map2k1/Fmr1/Ripor1/Arhgap21/Ezr/Myh10/Myh9/Mcph1/Kif1c/Tacc1/Exoc4/Braf/Dvl1/Prkca/Cep83/Cln3/Map4/Syne1/Fer/Xpo1/Hif1a/Picalm/Rap1a/Mad1l1	37
GO:0098974	GO:0098974	postsynaptic actin cytoskeleton organization	6/842	16/23210	1.31232e-05	0.000554567	0.00042561	Farp1/Sipa1l1/Myh10/Arhgef7/Wasf2/Dbnl	6
GO:0099188	GO:0099188	postsynaptic cytoskeleton organization	6/842	16/23210	1.31232e-05	0.000554567	0.00042561	Farp1/Sipa1l1/Myh10/Arhgef7/Wasf2/Dbnl	6
GO:0030258	GO:0030258	lipid modification	22/842	218/23210	1.57705e-05	0.000655145	0.0005028	St3gal4/Pik3r1/Efr3b/Plpp1/Pik3cd/Dgkd/Nucb2/Pik3c2a/Pparg/Pik3c2b/Inpp5b/Plpp3/Socs5/Ppard/Ttc7b/Acaa1a/Hsd17b4/Pex5/Acox1/Mtmr2/Dgat1/Pten	22
GO:0106027	GO:0106027	neuron projection organization	14/842	102/23210	1.88931e-05	0.000722754	0.000554687	Tanc1/App/Eef2k/Sipa1l1/Fyn/Adam10/Afdn/Itga3/Dvl1/Mtmr2/Ube3a/Caprin1/Dbnl/Pten	14
GO:0198738	GO:0198738	cell-cell signaling by wnt	33/842	430/23210	4.76284e-05	0.00150629	0.00115602	Sdc1/Mdfic/Plpp3/Senp2/Rapgef1/Tle4/Tbl1x/Wnk1/Strn/Gnaq/Brd7/Xiap/Stk3/Tcf7l1/Usp47/Rnf138/Mark2/Cdk14/Itga3/Egfr/Sulf2/Dvl1/Ccny/Ctnnbip1/Wwox/Gata3/Spin1/Src/Apc/Ror1/Csnk1g2/Csnk1e/Pten	33
GO:0043393	GO:0043393	regulation of protein binding	22/842	240/23210	6.85864e-05	0.00203764	0.00156381	App/Rgma/Ica1/Ldlrap1/Senp2/Tgfbr3/Ripor1/Mapre3/Stk3/Mark2/Arrb1/Dvl1/Ctnnbip1/Arhgef7/Aida/Crk/Carm1/Sppl3/Src/Hsf1/Csnk1e/Taf1	22
GO:0010657	GO:0010657	muscle cell apoptotic process	13/842	103/23210	9.04322e-05	0.00253314	0.00194409	Pik3r1/Lifr/Ghrh/Pparg/Rgl2/Gnb1/Qk/Grk2/Arrb1/Pcmt1/Rps6ka2/Hsf1/Pten	13
GO:0072698	GO:0072698	protein localization to microtubule cytoskeleton	9/842	52/23210	9.44808e-05	0.00260146	0.00199652	Snx10/Fam83d/Mid2/Mapre3/Mcph1/Dvl1/Mid1/Cep83/Apc	9
GO:0099175	GO:0099175	regulation of postsynapse organization	14/842	125/23210	0.000180652	0.0040998	0.00314645	Tanc1/Eef2k/Sipa1l1/Fyn/Arhgap22/Adam10/Sorbs1/Afdn/Sema3f/Numb/Ube3a/Caprin1/Dbnl/Pten	14
GO:0009314	GO:0009314	response to radiation	29/842	395/23210	0.000283647	0.0057456	0.00440954	Tanc1/Pik3r1/App/Kit/Pparg/Grb2/Ube2a/Gnb1/Kras/Meis2/Fmr1/Hmgn1/Spidr/Xrcc5/Usp47/Mapk9/Arrb1/Egfr/Braf/Rela/Xrcc4/Gata3/Crebbp/Hif1a/Ints3/Cul4b/Hsf1/Taf1/Topbp1	29
GO:0009611	GO:0009611	response to wounding	34/842	495/23210	0.000308082	0.00606514	0.00465477	Entpd1/Dst/Sdc1/Notch2/Fn1/Prkce/Gnas/Elk3/Rgma/Plec/Plet1/Prcp/Xylt1/Mir17hg/Acvrl1/Ppard/Ptprj/Pros1/Map2k1/Ripor1/Myh10/Myh9/Phldb2/Pip5k1c/Egfr/Sulf2/Dsp/Itgb3/Braf/Prkca/Crk/Hif1a/Tfpi/Pten	34
GO:0050657	GO:0050657	nucleic acid transport	15/842	148/23210	0.000325899	0.0062896	0.00482704	Igf2bp1/Senp2/Qk/Fmr1/Thoc2/Igf2bp3/Xpo7/Gle1/Xpo1/Pura/Nup153/Hnrnpa3/Hsf1/Khdrbs1/Nup160	15
GO:0050658	GO:0050658	RNA transport	15/842	148/23210	0.000325899	0.0062896	0.00482704	Igf2bp1/Senp2/Qk/Fmr1/Thoc2/Igf2bp3/Xpo7/Gle1/Xpo1/Pura/Nup153/Hnrnpa3/Hsf1/Khdrbs1/Nup160	15
GO:0010959	GO:0010959	regulation of metal ion transport	30/842	421/23210	0.000371803	0.0066898	0.00513417	Chd7/Nos1ap/Homer2/Plcb4/Pawr/Atp2b1/Fyn/Pik3c2a/Pdgfrb/Ptpn3/Prkce/Gnas/Nedd4l/Pacsin3/Slc8b1/Wnk1/Gnaq/Trpv2/Fmr1/Stk39/Nkain2/Nedd4/Asph/Itgb3/Plcg1/Dmd/Ahcyl1/Akap7/Akt3/Pten	30
GO:0110053	GO:0110053	regulation of actin filament organization	21/842	255/23210	0.00043294	0.00736899	0.00565543	Pik3r1/Arhgap28/Arhgap18/Prex1/Wasf1/Prkce/Grb2/Pxn/Arpc1b/Dlc1/Rdx/Plekhh2/Phldb2/Tmod3/Fchsd2/Braf/Plekhg2/Fer/Wasf2/Dbnl/Nck2	21
GO:1905475	GO:1905475	regulation of protein localization to membrane	17/842	186/23210	0.00045785	0.00772643	0.00592975	Pik3r1/Mtcl1/Fyn/Ldlrap1/Adam10/Map2k1/Ogt/Sorbs1/Ezr/Itga3/Egfr/Appl1/Numb/Sqstm1/Ptpn9/Picalm/Rap1a	17
GO:0099149	GO:0099149	regulation of postsynaptic neurotransmitter receptor internalization	5/842	23/23210	0.00121174	0.0158399	0.0121565	Nedd4/Pip5k1c/Itgb3/Numb/Syne1	5
GO:0010713	GO:0010713	negative regulation of collagen metabolic process	4/842	14/23210	0.00128646	0.0161284	0.012378	Pparg/Ppard/Errfi1/Rap1a	4
GO:0032966	GO:0032966	negative regulation of collagen biosynthetic process	4/842	14/23210	0.00128646	0.0161284	0.012378	Pparg/Ppard/Errfi1/Rap1a	4
GO:0098911	GO:0098911	regulation of ventricular cardiac muscle cell action potential	4/842	14/23210	0.00128646	0.0161284	0.012378	Pkp2/Dsc2/Dsp/Jup	4
GO:0150063	GO:0150063	visual system development	27/842	400/23210	0.00158392	0.0189838	0.0145694	Chd7/Notch2/Pdgfrb/Grhl2/Clic4/Gpd2/Arid1a/Acvrl1/Gnb1/Pds5a/Bcar3/Meis2/Hmgn1/Tcirg1/Myh10/Rxra/Egfr/Prom1/Meis1/Sos1/Sp1/Bmpr2/Gata3/Apc/Hif1a/Sp3/Crybg3	27
GO:0120034	GO:0120034	positive regulation of plasma membrane bounded cell projection assembly	11/842	106/23210	0.00162435	0.0193266	0.0148325	Kit/Palm/Tapt1/Fscn1/Fmr1/Auts2/Kctd17/Ccdc88a/Apc/Wasf2/Sept9	11
GO:1905269	GO:1905269	positive regulation of chromatin organization	11/842	112/23210	0.00252276	0.0262003	0.0201078	Jdp2/Ogt/Brd7/Fmr1/Bcl6/Auts2/Nsd3/Arrb1/Jarid2/Gata3/Paxbp1	11
GO:1905331	GO:1905331	negative regulation of morphogenesis of an epithelium	4/842	17/23210	0.00280463	0.0278306	0.0213589	Phldb2/Cited1/Gata3/Pten	4
GO:0098927	GO:0098927	vesicle-mediated transport between endosomal compartments	6/842	42/23210	0.00385128	0.0351564	0.0269812	Map2k1/Rdx/Ezr/Lmtk2/Mtmr2/Src	6
GO:0099172	GO:0099172	presynapse organization	7/842	57/23210	0.00440166	0.0380545	0.0292055	App/Farp1/Sdcbp/Dvl1/Arhgef7/Picalm/Pten	7
GO:0098884	GO:0098884	postsynaptic neurotransmitter receptor internalization	5/842	31/23210	0.00481646	0.0406621	0.0312067	Nedd4/Pip5k1c/Itgb3/Numb/Syne1	5
GO:0140239	GO:0140239	postsynaptic endocytosis	5/842	31/23210	0.00481646	0.0406621	0.0312067	Nedd4/Pip5k1c/Itgb3/Numb/Syne1	5
GO:0005996	GO:0005996	monosaccharide metabolic process	18/842	253/23210	0.00525278	0.0431309	0.0331014	Lepr/Pik3r1/Hectd4/Prkce/Man1c1/Gpd2/Gale/Ogt/Sorbs1/Pfkp/Ncoa2/Fam3c/Lcmt1/Xylb/Ldha/Src/Hif1a/Akr1a1	18
GO:0099111	GO:0099111	microtubule-based transport	13/842	159/23210	0.00536619	0.0436961	0.0335351	App/Dst/Map1b/Tmem108/Wasf1/Map2k1/Fmr1/Arhgap21/Kif1c/Cln3/Pura/Nme7/Hif1a	13
GO:0120192	GO:0120192	tight junction assembly	6/842	45/23210	0.00545633	0.0442098	0.0339294	Prkch/Grhl2/Nedd4l/Pkp2/Esam/Afdn	6
GO:0097756	GO:0097756	negative regulation of blood vessel diameter	10/842	107/23210	0.00553631	0.0444842	0.03414	Dock5/Mgll/Atp2b1/Rap1gds1/Map2k1/Grk2/Egfr/Dock4/Bmpr2/Hif1a	10
GO:1901615	GO:1901615	organic hydroxy compound metabolic process	29/842	481/23210	0.00554682	0.0444842	0.03414	Lepr/Plcb4/App/Kit/Plpp1/Fdxr/Epas1/Inpp5b/Apobr/Ldlrap1/Ldlr/Acaa1a/Pnkd/Ppip5k2/Hdlbp/Dhdds/Acer3/Cited1/Appl1/Coq2/Plcg1/Sgpp2/Gata3/Ldha/Mtmr2/Scap/Hif1a/Akr1a1/Pten	29

## Sheet: SynTI.GO.up
	ID	Description	GeneRatio	BgRatio	pvalue	p.adjust	qvalue	geneID	Count
GO:0010256	GO:0010256	endomembrane system organization	43/686	384/23210	7.32159e-14	3.36427e-10	2.70591e-10	Myof/Ndrg1/Baiap2l1/Agfg1/Optn/Agrn/Kifc3/Lyst/Shtn1/Stx6/Eif2ak3/Vmp1/Mtss1/Dysf/Fhdc1/Snx9/Bin2/Psap/Serpine2/Osbpl2/Epb41l3/Rab10/Syngr1/Bcas3/Stx2/Sptbn1/Whamm/Mpp5/Nectin2/Cltc/Hook2/Arfgef2/Als2cl/Coro7/Rtn4/Bag6/Syne2/Camsap2/Gbf1/Lemd3/Synj1/Plekhm2/Snx3	43
GO:1990778	GO:1990778	protein localization to cell periphery	38/686	344/23210	3.23985e-12	7.44355e-09	5.9869e-09	C2cd5/Wnk3/Epb41/Prkcz/Clip1/Ppfia1/Optn/Kif13a/Rapgef2/Stx3/Arhgef16/Pid1/Snx27/Dlg1/Myo5b/Tspan5/Dlg4/Cacnb2/Epb41l3/Rabep1/Dab2/Rab10/Nsf/Sptbn1/Kalrn/Acsl3/Golga4/Tmbim1/Camk2d/Pdpk1/Mpp5/Anxa2/Cltc/Dennd4c/Prkci/Stx8/Cnst/Snap23	38
GO:0051056	GO:0051056	regulation of small GTPase mediated signal transduction	30/686	259/23210	1.99741e-10	1.58337e-07	1.27351e-07	Akap13/Mapre2/Ralgps1/Kitl/Arhgef3/Kank1/Amot/Eps8/Iqsec1/Fgd4/Psd4/Arhgap26/Arhgef16/Arhgap42/Itpkb/Itsn1/Arhgef10l/Flcn/Dennd1a/Arhgef18/Kalrn/Bcr/Camk2d/Arhgef37/Arhgef12/Arfgap1/Arfgef2/Rtn4/Itsn2/Lpar1	30
GO:0046578	GO:0046578	regulation of Ras protein signal transduction	28/686	228/23210	2.06751e-10	1.58337e-07	1.27351e-07	Akap13/Mapre2/Ralgps1/Kitl/Arhgef3/Kank1/Eps8/Iqsec1/Fgd4/Psd4/Arhgef16/Arhgap42/Itpkb/Itsn1/Arhgef10l/Flcn/Dennd1a/Arhgef18/Kalrn/Bcr/Camk2d/Arhgef37/Arhgef12/Arfgap1/Arfgef2/Rtn4/Itsn2/Lpar1	28
GO:0010976	GO:0010976	positive regulation of neuron projection development	35/686	362/23210	9.13908e-10	5.24926e-07	4.22201e-07	Snap91/Lrp8/Dlg5/Cux1/Rufy3/Smurf1/Rapgef2/Plxna2/Shtn1/Epha4/Dvl3/Itsn1/Mtor/Myo5b/Plxnb1/Dlg4/Mfn1/Serpine2/Ppp1r9a/Tbc1d24/Lyn/Kalrn/Golga4/Ehd1/Fig4/Scarb2/Rtn4/Prkci/Itpr1/Itsn2/Lpar1/Fgfr1/Anapc2/Kidins220/Snx3	35
GO:0043112	GO:0043112	receptor metabolic process	24/686	205/23210	1.05281e-08	3.22511e-06	2.59398e-06	Tfrc/Plcg2/Atxn2/Iqsec1/Optn/Agrn/Smurf1/Kif16b/Pard3/Cd9/Lgmn/Dlg4/Eps15/Dab2/Itgav/Nsf/Lmbrd1/Anxa2/Cltc/Myo6/Arfgef2/Ankrd13c/Ankrd13a/Synj1	24
GO:1905475	GO:1905475	regulation of protein localization to membrane	22/686	186/23210	3.57295e-08	9.12096e-06	7.33605e-06	C2cd5/Wnk3/Prkcz/Ppfia1/Stx3/Arhgef16/Pid1/Snx27/Dlg1/Myo5b/Dab2/Sptbn1/Kalrn/Acsl3/Tmbim1/Camk2d/Pdpk1/Cltc/Ssh1/Prkci/Stx8/Cnst	22
GO:0016197	GO:0016197	endosomal transport	23/686	204/23210	4.32602e-08	1.04621e-05	8.41478e-06	Dennd2a/Lyst/Stx6/Snx27/Snx8/Rab11fip4/Myo5b/Dennd1b/Snx9/Spag9/Evi5/Rab11fip3/Eps15/Rab10/Tbc1d14/Dennd1a/Ehd1/Erc1/Cltc/Gbf1/Sgsm2/Snx6/Eipr1	23
GO:0006898	GO:0006898	receptor-mediated endocytosis	24/686	222/23210	4.97155e-08	1.13555e-05	9.13334e-06	Snap91/Tfrc/Plcg2/Atxn2/Iqsec1/Hspg2/Ap2a2/Pard3/Cd9/Dlg4/Snx9/Tnk2/Eps15/Dab2/Aak1/Nsf/Insr/Lmbrd1/Anxa2/Cltc/Myo6/Scarb2/Ankrd13a/Synj1	24
GO:0098876	GO:0098876	vesicle-mediated transport to the plasma membrane	15/686	99/23210	2.1289e-07	3.76243e-05	3.02615e-05	Optn/Kif13a/Stx3/Stxbp6/Snx27/Myo5b/Rabep1/Rab10/Nsf/Sptbn1/Acsl3/Golga4/Arfgef2/Cnst/Snap23	15
GO:0043087	GO:0043087	regulation of GTPase activity	27/686	295/23210	2.34535e-07	3.99144e-05	3.21034e-05	Mapre2/Iqgap2/Lrch1/Tbc1d4/Amot/Iqsec1/Agrn/Rapgef2/Arhgef16/Plxna2/Epha4/Dvl3/Arhgap42/Asap3/Mtor/Plxnb1/Dennd1b/Snx9/Evi5/Flcn/Tbc1d14/Dennd1a/Bcas3/Kalrn/Bcr/Arap2/Sgsm2	27
GO:0045860	GO:0045860	positive regulation of protein kinase activity	34/686	438/23210	3.51712e-07	5.57282e-05	4.48226e-05	Dab1/Akap13/Tgfa/Lrp8/Kitl/Tead1/Acvr2b/Prkcz/Agrn/Rapgef2/Fgd4/Epha4/Dvl3/Csf1r/Dlg1/Dlg4/Snx9/Pdgfb/Spag9/Map3k5/Ppp1r9a/Dab2/Map3k4/Sdc4/Insr/Maged1/Stk4/Strada/Pim1/Pdpk1/Frs2/Irak1/Lpar1/Fgfr1	34
GO:0001667	GO:0001667	ameboidal-type cell migration	32/686	406/23210	5.56028e-07	7.98421e-05	6.42176e-05	Mapre2/Tns1/Kitl/Kank1/Macf1/Amot/Iqsec1/Bmper/Sema6a/Folr1/Prr5l/Hbegf/Arid5b/Mtor/Lgals8/Anxa3/Lgmn/Pdgfb/Ovol2/Sema4b/Itgav/Sdc4/Bcas3/Pdpk1/Rffl/Rtn4/Syne2/Pdxdc1/Fgfr1/Appl2/Lemd3/Smurf2	32
GO:0048268	GO:0048268	clathrin coat assembly	6/686	18/23210	8.93552e-06	0.000774693	0.000623091	Snap91/Epn1/Eps15/Dab2/Cltc/Clint1	6
GO:1905477	GO:1905477	positive regulation of protein localization to membrane	13/686	102/23210	9.79728e-06	0.000818518	0.00065834	C2cd5/Wnk3/Stx3/Arhgef16/Snx27/Dlg1/Myo5b/Sptbn1/Acsl3/Pdpk1/Ssh1/Prkci/Cnst	13
GO:0099003	GO:0099003	vesicle-mediated transport in synapse	21/686	246/23210	1.47938e-05	0.00111439	0.000896308	Snap91/Iqsec1/Stx3/Stx6/Itsn1/Fgfr2/Myo5b/Fbxl20/4932438A13Rik/Eps15/Kif5a/Spg11/Dennd1a/Stx2/Erc1/Cltc/Napa/Myo6/Ap3s1/Synj1/Snap23	21
GO:0110053	GO:0110053	regulation of actin filament organization	21/686	255/23210	2.53574e-05	0.0016183	0.00130161	Iqgap2/Kank1/Eps8/Baiap2l1/Ppfia1/Lima1/Kirrel/Asap3/Mtss1/Mtor/Sorbs3/Dlg1/Abi2/Arhgef10l/Snx9/Carmil1/Ppp1r9a/Sdc4/Sptbn1/Whamm/Lpar1	21
GO:0099072	GO:0099072	regulation of postsynaptic membrane neurotransmitter receptor levels	12/686	96/23210	2.61105e-05	0.00164353	0.0013219	Eps8/Iqsec1/Prkcz/Stx3/Dlg1/Dlg4/Eps15/Kalrn/Myo6/Prkci/Synj1/Snap23	12
GO:1905039	GO:1905039	carboxylic acid transmembrane transport	12/686	104/23210	5.83026e-05	0.00311512	0.00250551	Slc38a1/Stra6/Slc23a2/Folr1/Slc1a1/Slc7a7/Slc16a1/Slc38a2/Folr2/Abcc1/AU018091/Slc7a8	12
GO:0048639	GO:0048639	positive regulation of developmental growth	18/686	214/23210	7.17918e-05	0.00350939	0.00282263	Rufy3/Agrn/Smurf1/Shtn1/Mtor/Yap1/Dlg1/Fgfr2/Myo5b/Rbpj/Insr/Pim1/Golga4/Rtn4/Itsn2/Fgfr1/Anapc2/Ddx39b	18
GO:0061951	GO:0061951	establishment of protein localization to plasma membrane	9/686	62/23210	8.17285e-05	0.0039119	0.00314637	Optn/Kif13a/Snx27/Myo5b/Nsf/Sptbn1/Acsl3/Golga4/Cnst	9
GO:0051656	GO:0051656	establishment of organelle localization	30/686	473/23210	8.27258e-05	0.00391881	0.00315193	Snap91/Tacc2/Prkcz/Bicdl1/Kif13a/Stx3/Pard3/Dync1h1/Dlg1/Fgfr2/Pex14/Fbxl20/Kif5a/Spg11/Mark1/Stx2/Lyn/Pdpk1/Nectin2/Erc1/Napa/Myo6/Ltv1/Pard3b/Ap3s1/Syne2/Gbf1/Synj1/Snap23/Eipr1	30
GO:0006914	GO:0006914	autophagy	26/686	386/23210	9.29032e-05	0.00408863	0.00328851	Sesn1/Eif4g1/Tpcn1/Foxo3/Optn/Smurf1/Wdfy3/Ctsa/Vmp1/Pik3cb/Rab12/Mtor/Lgals8/Wipi2/Tfeb/Atp6v0a1/Flcn/Tbc1d14/Rab24/Cltc/Soga1/Map3k7/Atg4c/Atg10/Atg7/Dap	26
GO:0061919	GO:0061919	process utilizing autophagic mechanism	26/686	386/23210	9.29032e-05	0.00408863	0.00328851	Sesn1/Eif4g1/Tpcn1/Foxo3/Optn/Smurf1/Wdfy3/Ctsa/Vmp1/Pik3cb/Rab12/Mtor/Lgals8/Wipi2/Tfeb/Atp6v0a1/Flcn/Tbc1d14/Rab24/Cltc/Soga1/Map3k7/Atg4c/Atg10/Atg7/Dap	26
GO:0051701	GO:0051701	interaction with host	12/686	117/23210	0.000182543	0.00689704	0.00554733	Eps15/Itgav/Insr/Ctsb/Nectin2/Kpna6/Trim25/Araf/Ddx39b/Atg7/Snx3/Trim26	12
GO:0010766	GO:0010766	negative regulation of sodium ion transport	5/686	19/23210	0.00018312	0.00689704	0.00554733	Wnk3/Agrn/Wnk4/Serpine2/Camk2d	5
GO:0031589	GO:0031589	cell-substrate adhesion	23/686	339/23210	0.000208453	0.00756753	0.00608661	Kank1/Macf1/Lims2/Hspg2/Prkcz/Fndc3b/Parvb/Pik3cb/Sorbs3/Itga5/Utrn/Carmil1/Dab2/Mertk/Itgav/Parva/Sdc4/Bcas3/Whamm/Bcr/Pdpk1/Ddr1/Itgb5	23
GO:0003015	GO:0003015	heart process	17/686	221/23210	0.000327941	0.00974517	0.0078381	Akap13/Thrb/Agrn/Wwtr1/Slc1a1/Hbegf/Srsf1/Mtor/Yap1/Dlg1/Cacnb2/Camk2d/Smtn/Pde4d/Taz/Dsg2/Tmem65	17
GO:0061842	GO:0061842	microtubule organizing center localization	6/686	33/23210	0.0003654	0.0105598	0.00849335	Sema6a/Plxna2/Pard3/Dlg1/Pard3b/Syne2	6
GO:0060390	GO:0060390	regulation of SMAD protein signal transduction	5/686	23/23210	0.000480473	0.0125311	0.0100789	Wwtr1/Ovol2/Dab2/Rbpms/Sptbn1	5
GO:0042060	GO:0042060	wound healing	23/686	360/23210	0.000488155	0.0125311	0.0100789	Tec/Myof/Kank1/Macf1/Mylk/Lyst/Pard3/Cd9/Hbegf/Pik3cb/Mtor/Yap1/Dysf/Pdgfb/Serpine2/Mertk/Sdc4/Cnn2/Lyn/Anxa5/Ddr1/Anxa2/Psg23	23
GO:0099173	GO:0099173	postsynapse organization	15/686	194/23210	0.00068327	0.0159026	0.0127906	Lrp8/Ndrg1/Agrn/Epha4/Snx27/Nrcam/Myo5b/Abi2/Lgmn/Dlg4/Mfn1/Ppp1r9a/Insr/Kalrn/Ssh1	15
GO:0032885	GO:0032885	regulation of polysaccharide biosynthetic process	6/686	37/23210	0.000693862	0.0159185	0.0128033	Mtor/Pdgfb/Insr/Grb10/Cltc/Ppp1cb	6
GO:0046486	GO:0046486	glycerolipid metabolic process	21/686	325/23210	0.000730133	0.0163657	0.013163	Cds1/Plcg2/Thrb/Etnk1/Smg1/Csf1r/Lipg/Pik3cb/Slc22a4/Pdgfb/Capn2/Dgke/Abhd16a/Pip5k1b/Acsl3/Fig4/Mtmr4/Synj1/Ip6k2/Ddhd2/Taz	21
GO:0110020	GO:0110020	regulation of actomyosin structure organization	10/686	100/23210	0.00075499	0.0168407	0.0135451	Akap13/Ppfia1/Asap3/Mtor/Sorbs3/Arhgef10l/Carmil1/Ppp1r9a/Sdc4/Lpar1	10
GO:0110110	GO:0110110	positive regulation of animal organ morphogenesis	10/686	101/23210	0.000816225	0.0174444	0.0140307	Pax2/Pax8/Fgfr2/Rbpj/Maged1/Pim1/Frs2/Rtn4/Itpr1/Fgfr1	10
GO:0106027	GO:0106027	neuron projection organization	10/686	102/23210	0.000881485	0.0185438	0.0149149	Lrp8/Epha4/Myo5b/Abi2/Lgmn/Dlg4/Mfn1/Ppp1r9a/Insr/Kalrn	10
GO:0010506	GO:0010506	regulation of autophagy	17/686	247/23210	0.00114866	0.0215432	0.0173273	Sesn1/Eif4g1/Tpcn1/Foxo3/Optn/Smurf1/Ctsa/Rab12/Mtor/Tfeb/Atp6v0a1/Flcn/Tbc1d14/Soga1/Map3k7/Atg7/Dap	17
GO:1905244	GO:1905244	regulation of modification of synaptic structure	4/686	17/23210	0.00132422	0.0238619	0.0191923	Epha4/Itsn1/Myo5b/Kalrn	4
GO:0045931	GO:0045931	positive regulation of mitotic cell cycle	13/686	166/23210	0.00135378	0.0242992	0.019544	Tgfa/Shb/Eif4g1/Rb1/Rad51b/Nsmce2/Lgmn/Pdgfb/Insr/Camk2d/Lmnb1/Fgfr1/Anapc4	13
GO:1905476	GO:1905476	negative regulation of protein localization to membrane	5/686	31/23210	0.00199636	0.0320744	0.0257977	Ppfia1/Pid1/Dab2/Tmbim1/Cltc	5
GO:0044766	GO:0044766	multi-organism transport	4/686	19/23210	0.00205771	0.0321604	0.0258669	Eps15/Bst2/Kpna6/Ddx39b	4
GO:1902579	GO:1902579	multi-organism localization	4/686	19/23210	0.00205771	0.0321604	0.0258669	Eps15/Bst2/Kpna6/Ddx39b	4
GO:0198738	GO:0198738	cell-cell signaling by wnt	24/686	430/23210	0.00235843	0.0351851	0.0282996	Kank1/Macf1/Foxo3/Wwtr1/Folr1/Ppp2r3a/Dvl3/Ankrd6/Nlk/Yap1/Fgfr2/Csnk1g3/Dab2/Ubr5/Mertk/Rbpj/Mark1/Stk4/Prickle1/Grb10/Lzts2/Gskip/Rnf220/Snx3	24
GO:0010660	GO:0010660	regulation of muscle cell apoptotic process	9/686	98/23210	0.00247904	0.036238	0.0291465	Pax8/Map3k5/Capn2/Rbpj/Stk4/Pdcd4/Camk2d/Pdpk1/Dnmt1	9
GO:0062012	GO:0062012	regulation of small molecule metabolic process	21/686	359/23210	0.00248545	0.036238	0.0291465	Thrb/Pid1/Clybl/Slc7a7/Eif2ak3/Cd320/Mtor/Pdgfb/Flcn/Dab2/Insr/Grb10/Pptc7/Cltc/Soga1/Lonp2/Ppp1cb/Maea/Appl2/Acadm/Taz	21
GO:0007035	GO:0007035	vacuolar acidification	4/686	20/23210	0.00251257	0.036238	0.0291465	Dmxl2/Atp6v0a1/Atp6v0d1/Dmxl1	4
GO:0031642	GO:0031642	negative regulation of myelination	3/686	10/23210	0.00264078	0.0372221	0.029938	Eif2ak3/Fig4/Tnfrsf21	3
GO:1905820	GO:1905820	positive regulation of chromosome separation	3/686	10/23210	0.00264078	0.0372221	0.029938	Rb1/Nsmce2/Anapc4	3
GO:2001179	GO:2001179	regulation of interleukin-10 secretion	3/686	10/23210	0.00264078	0.0372221	0.029938	Prkcz/Lgals9/Tnfrsf21	3
GO:0090659	GO:0090659	walking behavior	6/686	48/23210	0.00278412	0.0383025	0.0308069	Dab1/Epha4/Hipk2/Psap/Spg11/Atg7	6
GO:0043900	GO:0043900	regulation of multi-organism process	22/686	391/23210	0.00318686	0.0422007	0.0339423	Shb/Traf3/Optn/Lgals9/Csf1r/Plat/Tfeb/Ifnlr1/Itgav/Stat1/Tpst2/Bst2/Anxa2/Nectin2/Kpna6/Ppm1b/Trim25/Smurf2/Adar/Rsf1/Snx3/Trim26	22
GO:0002224	GO:0002224	toll-like receptor signaling pathway	9/686	103/23210	0.00347349	0.0445829	0.0358583	Traf3/Lgals9/Lyn/Pdpk1/Mapkapk2/Pja2/Irak1/Rtn4/Appl2	9
GO:1905288	GO:1905288	vascular associated smooth muscle cell apoptotic process	3/686	11/23210	0.00355177	0.0448362	0.036062	Stk4/Pdcd4/Dnmt1	3
GO:1905459	GO:1905459	regulation of vascular associated smooth muscle cell apoptotic process	3/686	11/23210	0.00355177	0.0448362	0.036062	Stk4/Pdcd4/Dnmt1	3
GO:0050803	GO:0050803	regulation of synapse structure or activity	17/686	276/23210	0.00367866	0.0461843	0.0371464	Snap91/Lrp8/Dlg5/Eif4g1/Agrn/Epha4/Malat1/Itsn1/Snx27/Nrcam/Myo5b/Abi2/Mfn1/Ppp1r9a/Kalrn/Ssh1/Anapc2	17

## Sheet: SynTII.GO.up
	ID	Description	GeneRatio	BgRatio	pvalue	p.adjust	qvalue	geneID	Count
GO:0031589	GO:0031589	cell-substrate adhesion	35/482	339/23210	6.51602e-15	2.71392e-11	2.02751e-11	Vegfa/Lama5/Col13a1/Itgb4/Lamc1/Nid2/Iqgap1/Smoc1/Itga3/Tesk2/Smad3/Sorbs1/Peak1/Phldb2/St6gal1/Camsap3/Lamb1/Dag1/Lamb2/Cdk5/Dock1/Itga6/Utrn/Rreb1/Dlc1/Ctnnb1/Efna5/Epb41l5/Lgals1/Pip5k1a/Clasp2/Cttn/Ptprk/Rcc2/Fer	35
GO:0007044	GO:0007044	cell-substrate junction assembly	18/482	86/23210	1.56557e-13	3.2603e-10	2.4357e-10	Vegfa/Itgb4/Lamc1/Iqgap1/Tesk2/Smad3/Sorbs1/Peak1/Phldb2/Camsap3/Dlc1/Efna5/Epb41l5/Pip5k1a/Clasp2/Cttn/Ptprk/Rcc2	18
GO:0007264	GO:0007264	small GTPase mediated signal transduction	32/482	485/23210	1.04961e-08	3.97422e-06	2.96905e-06	Arap3/Bcar3/Iqsec2/Sipa1l3/Itga3/Stmn1/Rab31/Farp1/Sipa1l1/Arhgap44/Rufy1/Srgap1/Rab2b/Baiap2/Nisch/Dhcr24/Abca1/Arhgef5/Eps8l2/Dock1/Cbl/Dlc1/Arhgap31/Trio/Mras/Vav2/Ralgds/Phactr4/Rabgef1/Lpar1/Chuk/Rhot1	32
GO:1990778	GO:1990778	protein localization to cell periphery	26/482	344/23210	1.73154e-08	5.98797e-06	4.47348e-06	Tmem150a/Lama5/Map7/Pdzk1/Ank3/Cdh1/Iqsec2/Itga3/Rab31/Sorbs1/Arhgap44/Egfr/Gpc6/Dag1/Cdk5/Bcl2l1/Gphn/Bsg/Ezr/Rapgef6/Gak/Pip5k1a/Atp1b3/Akt1/Clasp2/Actb	26
GO:0019827	GO:0019827	stem cell population maintenance	17/482	165/23210	6.65421e-08	1.63028e-05	1.21795e-05	Tbx3/Prdm16/Tcf7l2/Trp63/Zhx2/Gata2/Lrp5/Tcf7l1/Med14/Ski/Cdc73/Ctnnb1/Tead3/Arid1a/Wdr62/Bcl9l/Ctr9	17
GO:1905475	GO:1905475	regulation of protein localization to membrane	18/482	186/23210	7.21034e-08	1.66839e-05	1.24642e-05	Shisa7/Pdzk1/Ank3/Iqsec2/Itga3/Sorbs1/Arhgap44/Egfr/Gpc6/Zmynd8/Dag1/Cdk5/Bcl2l1/Ezr/Myo1c/Akt1/Gsn/Actb	18
GO:0099173	GO:0099173	postsynapse organization	17/482	194/23210	6.85448e-07	0.000105737	7.89935e-05	Igf1r/Shisa7/Itga3/Sorbs1/Farp1/Sipa1l1/Arhgap44/Zmynd8/Baiap2/Arf4/Hdac6/Cdk5/Gphn/Abhd17b/Hspa8/Cttn/Actb	17
GO:1903825	GO:1903825	organic acid transmembrane transport	12/482	104/23210	1.72187e-06	0.000216101	0.000161444	Slc1a5/Slc7a2/Slc16a12/Slc16a3/Slc7a6/Slc38a4/Lrrc8d/Emb/Slc25a13/Slc7a5/Akt1/Irs2	12
GO:1905039	GO:1905039	carboxylic acid transmembrane transport	12/482	104/23210	1.72187e-06	0.000216101	0.000161444	Slc1a5/Slc7a2/Slc16a12/Slc16a3/Slc7a6/Slc38a4/Lrrc8d/Emb/Slc25a13/Slc7a5/Akt1/Irs2	12
GO:0034599	GO:0034599	cellular response to oxidative stress	19/482	268/23210	3.77029e-06	0.000356892	0.000266626	Pla2r1/Pde8a/Capn1/Egfr/Ppargc1b/Hdac6/Dapk1/Vkorc1l1/Agap3/P4hb/Ctnnb1/Nfe2l2/Mapt/Akt1/Ptprk/Stk25/Chuk/Atp7a/Fer	19
GO:0110053	GO:0110053	regulation of actin filament organization	18/482	255/23210	7.18161e-06	0.000606801	0.000453327	Fhod3/Stmn1/Smad3/Capn1/Phldb2/Baiap2/Arhgef5/Mtss1/Dlc1/Vasp/Myo1c/Hip1r/Gsn/Lpar1/Clasp2/Specc1l/Cttn/Fer	18
GO:0040029	GO:0040029	regulation of gene expression, epigenetic	19/482	284/23210	8.68753e-06	0.000695838	0.000519845	Airn/Suv39h1/Ppp3ca/Trim71/Ncor2/Tsix/Egfr/Zmiz1/Hdac6/Hdac4/Phf8/Ncor1/Ctnnb1/Eed/Kdm1b/Hat1/Arid1a/Limd1/Xist	19
GO:0010634	GO:0010634	positive regulation of epithelial cell migration	13/482	143/23210	9.37919e-06	0.000737062	0.000550643	Vegfa/Epb41l4b/Itga3/Gata2/Hdac6/Dock1/Rreb1/Plpp3/Gpi1/Nfe2l2/Epb41l5/Akt1/Clasp2	13
GO:0050673	GO:0050673	epithelial cell proliferation	24/482	425/23210	1.08284e-05	0.000805366	0.000601671	Vegfa/Ptprm/Tcf7l2/Apela/Trp63/Cdh1/Gata2/Smad3/Scarb1/Egfr/Mtss1/Adk/Nfib/Rreb1/Maged1/Cdc73/Ctnnb1/Flt1/Pura/Akt1/Hmgn1/Ptprk/Chuk/Atp7a	24
GO:0046889	GO:0046889	positive regulation of lipid biosynthetic process	10/482	93/23210	2.35409e-05	0.0014634	0.00109327	Igf1r/Tcf7l2/Sorbs1/Scarb1/Fabp3/Por/Zbtb20/Elovl5/Lpgat1/Akt1	10
GO:0006338	GO:0006338	chromatin remodeling	12/482	141/23210	3.97425e-05	0.00220703	0.00164882	Trp63/Baz1a/Tsix/Zmiz1/Hmg20b/Hdac4/Chd8/Ctnnb1/Cebpg/Arid1a/Cenpp/H3f3b	12
GO:0030100	GO:0030100	regulation of endocytosis	18/482	293/23210	4.61328e-05	0.00234321	0.00175056	Vegfa/Ppp3ca/Gata2/Rab31/Scarb1/Usp46/Rufy1/Nedd4/Epn2/Cbl/Bcl2l1/Camk1d/Scamp5/Ano6/Pacsin2/Hip1r/Hspa8/Rabgef1	18
GO:0106027	GO:0106027	neuron projection organization	10/482	102/23210	5.25725e-05	0.00263812	0.00197088	Igf1r/Itga3/Sipa1l1/Arhgap44/Zmynd8/Baiap2/Hdac6/Cdk5/Abhd17b/Cttn	10
GO:0044264	GO:0044264	cellular polysaccharide metabolic process	10/482	104/23210	6.2089e-05	0.00297242	0.00222063	Gcgr/B4galt5/Tcf7l2/Sorbs1/Hs2st1/Manba/Gys1/Akt1/Gbe1/Irs2	10
GO:0019432	GO:0019432	triglyceride biosynthetic process	6/482	35/23210	7.56798e-05	0.00331716	0.00247817	Tcf7l2/Sik1/Scarb1/Gpat3/Acsl4/Gpat4	6
GO:2000116	GO:2000116	regulation of cysteine-type endopeptidase activity	15/482	226/23210	8.29111e-05	0.00352372	0.00263249	Vegfa/Gramd4/Trp63/Cdh1/Smad3/Por/Dhcr24/Dapk1/Dlc1/Gpi1/Hip1r/Cast/Akt1/Gsn/Mdm2	15
GO:0051098	GO:0051098	regulation of binding	21/482	403/23210	0.00011943	0.0043986	0.0032861	Tcf7l2/Fam129b/Ppp3ca/Med25/Stmn1/Smad3/Nsd1/Hdac4/Ski/Cdk5/Pex19/Nfib/Ctnnb1/Hsp90ab1/Hip1r/Epb41l5/Eif3c/Akt1/Actb/Calm1/Stub1	21
GO:0071559	GO:0071559	response to transforming growth factor beta	14/482	208/23210	0.000122465	0.0043986	0.0032861	Igf1r/Zfhx3/Prdm16/Itga3/Smad3/Got1/Ski/Smad1/Trim33/Hsp90ab1/Epb41l5/Ptprk/Bcl9l/Stub1	14
GO:0055088	GO:0055088	lipid homeostasis	11/482	141/23210	0.000180143	0.00568406	0.00424644	Lrp5/Scarb1/Srebf2/Fabp3/Got1/Soat1/Zbtb20/Abca1/Rbp1/Ncor1/Acaca	11
GO:0016311	GO:0016311	dephosphorylation	19/482	366/23210	0.000260825	0.00734011	0.00548363	Ptprm/Synj2/Ptpn14/Ptprg/Iqgap1/Ppp3ca/Smad3/Farp1/Ptpre/Ppargc1b/Camsap3/Ptpn4/Rrp1b/Dlc1/Cttnbp2nl/Plpp3/Ptpra/Hsp90ab1/Ptprk	19
GO:1905477	GO:1905477	positive regulation of protein localization to membrane	9/482	102/23210	0.000276808	0.00763514	0.00570404	Pdzk1/Ank3/Itga3/Sorbs1/Egfr/Cdk5/Ezr/Myo1c/Akt1	9
GO:0099175	GO:0099175	regulation of postsynapse organization	10/482	125/23210	0.000286767	0.00785779	0.00587038	Shisa7/Sorbs1/Sipa1l1/Arhgap44/Zmynd8/Baiap2/Arf4/Cdk5/Abhd17b/Hspa8	10
GO:0150063	GO:0150063	visual system development	20/482	400/23210	0.000295603	0.00795409	0.00594232	Vegfa/Ptprm/Zhx2/Bcar3/Smoc1/Sipa1l3/Smad3/Lrp5/Egfr/Lamb2/Ski/Slc25a25/Fat1/Ctnnb1/Flt1/Arid1a/Phactr4/Grhl2/Hmgn1/Col4a1	20
GO:0051668	GO:0051668	localization within membrane	12/482	185/23210	0.00051303	0.0109578	0.00818633	Shisa7/Grik5/Iqsec2/Sorbs1/Usp46/Arhgap44/Gpc6/Nedd4/Dag1/Cdk5/Gphn/Gsn	12
GO:1905330	GO:1905330	regulation of morphogenesis of an epithelium	9/482	112/23210	0.000553599	0.0114713	0.00856998	Vegfa/Mllt3/Cdh1/Znrf3/Phldb2/Rreb1/Maged1/Ctnnb1/Clasp2	9
GO:0062012	GO:0062012	regulation of small molecule metabolic process	18/482	359/23210	0.000565722	0.0116071	0.00867138	Gcgr/Tcf7l2/Sik1/Sorbs1/Ncor2/Fabp3/Acsl4/Por/Zbtb20/Hdac4/Elovl5/Bcl2l1/Lpgat1/Ncor1/Akt1/Me1/Irs2/Atp7a	18
GO:0006898	GO:0006898	receptor-mediated endocytosis	13/482	222/23210	0.000799499	0.0147341	0.0110075	Vegfa/Pla2r1/Rab31/Usp46/Egfr/Nedd4/Cbl/Ezr/Reps1/Hip1r/Gak/Rabgef1/Cttn	13
GO:1905952	GO:1905952	regulation of lipid localization	10/482	145/23210	0.00092391	0.0160337	0.0119784	Pla2r1/Scarb1/Srebf2/Fabp3/Acsl4/Abca1/Ncor1/Akt1/Tmem135/Irs2	10
GO:0099170	GO:0099170	postsynaptic modulation of chemical synaptic transmission	4/482	22/23210	0.000998292	0.0167657	0.0125253	Cdh1/Ppp3ca/Rnf19a/Nedd4	4
GO:0071276	GO:0071276	cellular response to cadmium ion	4/482	23/23210	0.00118879	0.0188981	0.0141184	Egfr/Akt1/Gsn/Chuk	4
GO:1905668	GO:1905668	positive regulation of protein localization to endosome	3/482	12/23210	0.00170278	0.0233292	0.0174287	Vegfa/Ezr/Abhd17b	3
GO:0198738	GO:0198738	cell-cell signaling by wnt	19/482	430/23210	0.00178403	0.0240306	0.0179527	Tcf7l2/Mllt3/Cdh1/Itga3/Smad3/Lrp5/Znrf3/Lrrk1/Egfr/Tle3/Kremen1/Tcf7l1/Cdc73/Plpp3/Chd8/Ctnnb1/Limd1/Bcl9l/Ctr9	19
GO:0048524	GO:0048524	positive regulation of viral process	7/482	84/23210	0.00182392	0.0243481	0.01819	Tmprss2/Igf2r/Rrp1b/P4hb/Hspa8/Lgals1/Pabpc1	7
GO:0031647	GO:0031647	regulation of protein stability	14/482	275/23210	0.00195017	0.0254169	0.0189884	B4galt5/D7Ertd443e/Smad3/Hdac6/Pex19/Cdc73/Plpp3/Usp25/Hip1r/Hspa8/Atp1b3/Gsn/Mdm2/Stub1	14
GO:0009991	GO:0009991	response to extracellular stimulus	18/482	401/23210	0.00196515	0.0254979	0.0190489	Igf1r/Gcgr/Slc22a3/Tcf7l2/Sik1/Srebf2/Slc2a1/Itga6/Depdc5/Slc25a25/Rbp1/Nfe2l2/Mapt/Bckdhb/Akt1/Tmem135/Lars/Atg4b	18
GO:1903587	GO:1903587	regulation of blood vessel endothelial cell proliferation involved in sprouting angiogenesis	3/482	13/23210	0.00217966	0.0265631	0.0198447	Vegfa/Apela/Gata2	3
GO:1905666	GO:1905666	regulation of protein localization to endosome	3/482	13/23210	0.00217966	0.0265631	0.0198447	Vegfa/Ezr/Abhd17b	3
GO:0051560	GO:0051560	mitochondrial calcium ion homeostasis	4/482	27/23210	0.00220668	0.0265631	0.0198447	Tgm2/Slc8b1/Afg3l2/Rap1gds1	4
GO:0006007	GO:0006007	glucose catabolic process	3/482	14/23210	0.00273161	0.0306662	0.0229101	Lrp5/Pfkp/Gpi1	3
GO:0120031	GO:0120031	plasma membrane bounded cell projection assembly	20/482	488/23210	0.00325509	0.0347489	0.0259601	Lama5/Itgb4/Cfap43/Zmynd8/Hdac4/Eps8l2/Itga6/Pld1/Ano6/Ezr/Vav2/Rapgef6/Pip5k1a/Gsn/Lpar1/Cttn/Odf2/Rcc2/Atp7a/Fer	20
GO:0099633	GO:0099633	protein localization to postsynaptic specialization membrane	4/482	30/23210	0.00328101	0.0347489	0.0259601	Iqsec2/Gpc6/Dag1/Gphn	4
GO:0099645	GO:0099645	neurotransmitter receptor localization to postsynaptic specialization membrane	4/482	30/23210	0.00328101	0.0347489	0.0259601	Iqsec2/Gpc6/Dag1/Gphn	4
GO:0033561	GO:0033561	regulation of water loss via skin	4/482	31/23210	0.00370613	0.0366651	0.0273917	Trp63/Cdh1/Stmn1/Gak	4
GO:0099072	GO:0099072	regulation of postsynaptic membrane neurotransmitter receptor levels	7/482	96/23210	0.0038844	0.0377122	0.0281739	Iqsec2/Usp46/Arhgap44/Gpc6/Nedd4/Dag1/Gphn	7
GO:0120162	GO:0120162	positive regulation of cold-induced thermogenesis	7/482	96/23210	0.0038844	0.0377122	0.0281739	Igf1r/Vegfa/Prdm16/Adipor2/Trpv2/Ppargc1b/Gadd45g	7
GO:0016540	GO:0016540	protein autoprocessing	3/482	16/23210	0.0040749	0.0385727	0.0288168	Tmprss2/Capn1/Afg3l2	3
GO:0097284	GO:0097284	hepatocyte apoptotic process	3/482	16/23210	0.0040749	0.0385727	0.0288168	Igf1r/Bcl2l1/Gsn	3
GO:0098696	GO:0098696	regulation of neurotransmitter receptor localization to postsynaptic specialization membrane	3/482	16/23210	0.0040749	0.0385727	0.0288168	Iqsec2/Gpc6/Dag1	3
GO:0098974	GO:0098974	postsynaptic actin cytoskeleton organization	3/482	16/23210	0.0040749	0.0385727	0.0288168	Farp1/Sipa1l1/Actb	3
GO:0099188	GO:0099188	postsynaptic cytoskeleton organization	3/482	16/23210	0.0040749	0.0385727	0.0288168	Farp1/Sipa1l1/Actb	3
GO:1905155	GO:1905155	positive regulation of membrane invagination	3/482	16/23210	0.0040749	0.0385727	0.0288168	Gata2/Rab31/Ano6	3
GO:1903036	GO:1903036	positive regulation of response to wounding	6/482	73/23210	0.0040933	0.0386589	0.0288812	Igf1r/Rreb1/Plpp3/Ano6/Nfe2l2/Atp7a	6
GO:0110020	GO:0110020	regulation of actomyosin structure organization	7/482	100/23210	0.0048625	0.0427244	0.0319185	Stmn1/Smad3/Phldb2/Arhgef5/Dlc1/Lpar1/Clasp2	7
GO:1900452	GO:1900452	regulation of long-term synaptic depression	3/482	17/23210	0.00487253	0.0427244	0.0319185	Iqsec2/Bcl2l1/Mapt	3
GO:1905331	GO:1905331	negative regulation of morphogenesis of an epithelium	3/482	17/23210	0.00487253	0.0427244	0.0319185	Phldb2/Ctnnb1/Clasp2	3
GO:0062013	GO:0062013	positive regulation of small molecule metabolic process	9/482	155/23210	0.00520118	0.0449503	0.0335814	Tcf7l2/Sorbs1/Por/Zbtb20/Elovl5/Bcl2l1/Lpgat1/Akt1/Irs2	9
