# Supplementary material for: Single nuclei RNA-seq of mouse placental labyrinth development
Source: eLife. 2020 Nov 3;9:e60266. doi: 10.7554/eLife.60266 (PMC7669270; doi:10.7554/eLife.60266)
Supplement: Figure 5—figure supplement 1—source data 1. [file elife-60266-fig5-figsupp1-data1.csv]

	SynTI|SynTI	SynTI|Endo	SynTI|LaTP	SynTI|S-TGC Precursor	SynTI|S-TGC	SynTI|SynTII	SynTI|SynTI Precursor	SynTI|LaTP 2	Endo|SynTI	LaTP|SynTI	S-TGC Precursor|SynTI	S-TGC|SynTI	SynTII|SynTI	SynTI Precursor|SynTI	LaTP 2|SynTI	Endo|Endo	Endo|LaTP	Endo|S-TGC Precursor	Endo|S-TGC	Endo|SynTII	Endo|SynTI Precursor	Endo|LaTP 2	LaTP|Endo	S-TGC Precursor|Endo	S-TGC|Endo	SynTII|Endo	SynTI Precursor|Endo	LaTP 2|Endo	LaTP|LaTP	LaTP|S-TGC Precursor	LaTP|S-TGC	LaTP|SynTII	LaTP|SynTI Precursor	LaTP|LaTP 2	S-TGC Precursor|LaTP	S-TGC|LaTP	SynTII|LaTP	SynTI Precursor|LaTP	LaTP 2|LaTP	S-TGC Precursor|S-TGC Precursor	S-TGC Precursor|S-TGC	S-TGC Precursor|SynTII	S-TGC Precursor|SynTI Precursor	S-TGC Precursor|LaTP 2	S-TGC|S-TGC Precursor	SynTII|S-TGC Precursor	SynTI Precursor|S-TGC Precursor	LaTP 2|S-TGC Precursor	S-TGC|S-TGC
NOTCH1_WNT4	0	0	0	0	0	0	0	0	0	0	0	0	0	0	0	0	9.965784	0	0	0	0	0	0	0	0	0	0	0	0	0	0	0	0	0	0	0	0	0	0	0	0	0	0	0	0	0	0	0	0
CSF1R_CSF1	0	0	0	0	0	8.96000164740599	0	0	0	0	0	0	0	0	0	0	0	0	0	0	0	0	0	0	0	0	0	0	0	0	0	0	0	0	0	0	0	0	0	0	0	0	0	0	0	0	0	0	0
COL5A3_a2b1 complex	0	8.24317369881086	0	0	0	0	0	0	0	0	0	0	0	0	0	0	0	0	0	0	0	0	0	0	0	0	0	0	0	0	0	0	0	0	0	0	0	0	0	0	0	0	0	0	0	0	0	0	0
NRG1_a6b4 complex	0	0	0	0	0	9.16992471678022	0	0	0	0	0	0	0	0	0	0	0	0	0	0	0	0	0	0	0	0	0	0	0	0	0	0	0	0	0	0	0	0	0	0	0	0	0	0	0	0	0	0	0
COL13A1_a2b1 complex	0	0	0	0	0	0	0	0	0	0	0	0	0	0	0	0	0	0	0	0	0	0	0	0	0	9.48984767577721	0	0	0	0	0	0	0	0	0	0	0	0	0	0	0	0	0	0	0	0	0	0	0
JAG1_NOTCH4	0	7.61470955945312	0	0	0	0	0	0	0	0	0	0	0	0	0	0	0	0	0	0	0	0	0	0	0	0	7.81378090655495	0	0	0	0	0	0	0	0	0	0	0	0	0	0	0	0	0	0	0	0	0	0
CSF1_SLC7A1	0	0	0	0	0	0	0	0	0	0	0	0	9.965784	0	0	0	0	0	0	0	0	0	0	0	0	0	0	0	0	0	0	0	0	0	0	0	9.965784	0	0	0	0	0	0	0	0	9.965784	0	0	0
LGR5_RSPO3	0	0	0	0	0	0	0	0	0	0	0	0	0	0	0	0	0	0	0	0	0	0	9.84548976628229	0	0	8.8795829649507	0	0	0	0	0	0	0	0	0	0	0	0	0	0	0	0	0	0	0	0	0	0	0
COL5A3_a1b1 complex	0	8.86418585999219	0	0	7.99999971533791	0	0	0	0	0	0	0	0	0	0	0	0	0	0	0	0	0	0	0	0	0	0	0	0	0	0	0	0	0	0	0	0	0	0	0	0	0	0	0	0	0	0	0	0
PlexinA1_complex1_SEMA6D	0	0	0	0	0	0	0	0	0	0	0	0	0	0	0	0	0	0	0	0	0	0	0	0	0	8.94836694692259	0	0	0	0	0	0	0	0	0	0	0	0	0	0	0	0	0	0	0	0	0	0	0
DLK1_NOTCH4	0	0	0	0	0	0	0	0	0	0	0	0	0	0	0	9.62388120535137	0	0	0	0	0	0	0	0	0	0	0	0	0	0	0	0	0	0	0	0	0	0	0	0	0	0	0	0	0	0	0	0	0
COL4A4_a2b1 complex	0	8.51569955362196	0	0	0	0	0	0	0	0	0	0	0	0	0	0	0	0	0	0	0	0	0	0	0	0	0	0	0	0	0	0	0	0	0	0	0	0	0	0	0	0	0	0	0	0	0	0	0
COL4A5_a2b1 complex	0	0	0	0	0	0	0	0	0	0	0	0	0	0	0	0	0	0	0	0	0	0	0	0	0	8.21916823580007	0	0	0	0	0	0	0	0	0	0	0	0	0	0	0	0	0	0	0	0	0	0	0
NOTCH4_JAG2	0	0	0	0	0	0	0	0	9.965784	0	0	0	0	0	0	9.965784	0	0	0	9.965784	9.965784	9.965784	0	0	0	0	0	0	0	0	0	0	0	0	0	0	0	0	0	0	0	0	0	0	0	0	0	0	0
COL13A1_a1b1 complex	0	0	0	0	0	0	0	0	0	0	0	0	0	0	0	0	0	0	0	0	0	0	0	0	0	9.78463456089543	0	0	0	0	0	0	0	0	0	0	0	0	0	0	0	0	0	0	0	9.2312208960491	0	0	0
NOTCH1_JAG1	0	0	0	0	0	0	0	0	9.965784	0	0	0	0	0	0	0	0	0	0	0	9.965784	0	0	0	0	0	0	0	0	0	0	0	0	0	0	0	0	0	0	0	0	0	0	0	0	0	0	0	0
EPHB2_EFNB1	0	0	0	0	0	0	0	0	0	0	0	0	0	0	0	0	0	0	0	0	0	0	7.92481221894369	0	0	0	0	8.41785223022381	0	0	0	8.07681531238874	0	0	0	0	0	0	0	0	0	0	0	0	0	0	0	0	0
EGFR_TGFA	0	0	0	0	0	0	0	0	0	8.39231713811667	8.40514117847426	8.38801700068305	8.40939065147561	8.39231713811667	8.39231713811667	0	0	0	0	0	0	0	0	0	0	0	0	0	0	0	0	0	7.19967206017428	0	0	0	0	0	0	0	0	0	7.23840445466299	0	0	0	0	0	0
EFNA1_EPHA4	8.75488721750138	7.95419602572479	0	0	0	0	9.83605007039598	0	0	0	0	0	0	0	0	0	0	0	0	0	0	0	0	0	0	0	0	0	0	0	0	0	0	0	0	0	0	0	0	0	0	0	0	0	0	0	0	0	0
BMR1A_AVR2B_BMP7	0	0	9.55266881285218	0	0	0	0	0	0	0	0	0	0	0	0	0	0	0	0	0	0	0	0	0	0	0	0	0	8.10328752374993	0	0	0	0	0	8.28077048546852	8.40939065147561	7.91886295261251	8.85174875675397	8.17990880535285	0	0	0	0	0	0	0	0	0	0
PDGFB_PDGFRB	0	0	0	0	3.90689031094643	0	0	0	0	0	0	0	0	0	0	0	0	0	3.700439433479	0	0	0	0	0	0	0	0	0	0	0	0	0	0	0	0	0	0	0	0	0	0	0	0	0	0	0	0	0	0
BMP7_PTPRK	0	0	0	0	0	0	0	0	0	0.999999715337912	0	0	0	0	0	0	0	0	0	0	0	0	0	0	0	0	0	0	1.58496221605907	-2.84662087679521e-07	0.999999715337912	0.999999715337912	9.965784	9.965784	0	0	0	0	0	0	0	0	0	0	0	0	0	0	0
PDGFB_PDGFR complex	0	0	0	0	8.97154326928868	0	0	0	0	0	0	0	0	0	0	0	0	0	9.19967206017428	0	0	0	0	0	0	0	0	0	0	0	0	0	0	0	0	0	0	0	0	0	0	0	0	0	0	0	0	0	0
CD44_HBEGF	0	0	0	0	0	0	0	0	8.41362764436209	0	0	0	0	0	0	0	0	0	0	0	7.60733002908752	0	0	0	0	0	0	0	0	0	0	0	0	0	0	0	0	0	0	0	0	0	0	0	0	0	0	0	0
COL4A4_a1b1 complex	0	9.04984826478847	0	7.95419602572479	8.32192781022527	8.00562426453179	0	0	0	0	0	0	0	0	0	0	0	0	0	0	0	0	0	0	0	0	0	0	0	0	0	0	0	0	0	0	0	0	0	0	0	0	0	0	0	0	0	0	0
LGALS9_MET	0	0	8.75822293006464	0	0	0	0	8.79441558168802	0	0	0	0	0	0	0	0	8.75822293006464	0	0	0	0	0	0	0	0	0	0	0	0	0	0	0	0	0	8.76155094778239	8.76155094778239	8.75822293006464	8.764871306074	0	0	0	0	0	0	0	0	0	0	0
PDGFA_PDGFRA	0	0	0	9.85953450172057	10.1019753862871	0	7.45121082717024	0	0	0	0	0	0	0	0	0	0	0	0	0	0	0	0	0	0	0	0	0	0	0	0	0	0	0	0	0	0	0	0	0	0	0	0	0	0	9.86727845504757	0	0	0
NOTCH1_JAG2	0	0	0	0	0	0	0	0	-2.84662087679521e-07	0	0	0	0	0	0	-2.84662087679521e-07	0	0	0	-2.84662087679521e-07	9.965784	9.965784	0	0	0	0	0	0	0	0	0	0	0	0	0	0	0	0	0	0	0	0	0	0	0	0	0	0	0
NOTCH1_DLK1	0	0	0	0	0	0	0	0	0	0	0	0	0	0	0	9.965784	0	0	0	0	0	0	0	0	0	0	0	0	0	0	0	0	0	0	0	0	0	0	0	0	0	0	0	0	0	0	0	0	0
COL4A5_a1b1 complex	0	0	0	0	0	0	0	0	0	0	0	0	0	0	0	0	0	0	0	0	0	0	0	0	0	8.84862265576725	0	0	0	0	0	0	0	0	0	0	0	0	0	0	0	0	0	0	0	0	0	0	0
BMPR1A_BMPR2_BMP7	0	0	8.40939065147561	0	0	0	0	0	0	0	0	0	0	0	0	0	0	0	0	0	0	0	0	0	0	0	0	0	9.13699082741814	0	0	0	0	0	8.79766124119167	9.15481782439002	8.764871306074	8.63299491248087	8.99435315219677	0	0	0	0	0	0	0	0	0	0
EPHB4_EFNB1	0	7.58496221605907	0	0	0	7.77478677493909	0	0	0	0	0	0	0	0	0	8.22400138953602	0	0	0	8.353146540836	0	0	0	0	0	0	0	0	0	0	0	0	0	0	0	0	0	0	0	0	0	0	0	0	0	0	0	0	0
COL27A1_a2b1 complex	0	0	0	0	0	0	0	0	0	0	0	0	0	0	0	0	0	0	0	0	0	0	0	0	0	8.54689417522555	0	0	0	0	0	0	0	0	0	0	0	0	0	0	0	0	0	0	0	0	0	0	0
NRG1_NETO2	0	0	7.47573314630431	0	0	0	7.56224213955898	7.85798071046549	0	0	0	0	0	0	0	0	0	0	0	0	0	0	0	0	0	0	0	0	0	0	0	0	0	0	0	0	0	7.54689417522555	0	0	0	0	0	0	0	0	0	0	0
JAM3_JAM3	0	0	0	0	0	0	0	0	0	0	0	0	0	0	0	8.30833874547732	0	0	0	0	0	0	0	0	0	0	0	0	0	0	0	0	0	0	0	0	0	0	0	0	0	0	0	0	0	0	0	0	0
LAMC1_a7b1 complex	0	0	0	0	0	0	0	0	9.76321208215231	0	0	0	10.2467403138311	0	0	0	0	9.81057135007906	9.77148918483851	0	0	0	0	0	0	0	0	0	0	0	0	0	0	0	0	0	0	0	0	0	0	0	0	0	9.4283598880422	10.2819297422934	0	0	0
PLD2_ARF1	0	0	0	0	0	0	0	0	0	0	0	7.85798071046549	0	0	0	0	0	0	0	0	0	0	0	0	7.74819256492737	0	0	0	0	0	0	0	0	0	0	7.94836694692259	0	0	0	0	0	0	0	0	7.91886295261251	0	0	0	8.09803179829844
BMR1A_ACR2A_BMP7	0	0	0	0	0	0	0	0	0	0	0	0	0	0	0	0	7.87036443492132	0	0	0	0	0	0	0	0	0	0	0	7.70735884741879	0	0	0	0	0	7.71424523300403	7.69348667283724	7.51569955362196	7.85174875675397	7.87651666190291	0	0	0	0	0	0	0	0	0	0
VEGFA_EPHB2	0	0	7.65821119808971	0	0	0	0	8.23361939209761	0	0	0	0	0	0	0	0	0	0	0	0	0	0	0	0	0	0	0	0	0	0	0	0	0	0	0	0	10.0674340760944	0	0	0	0	0	0	0	0	0	0	0	0
ACVR_1A2A receptor_BMP7	0	0	0	0	0	0	0	0	0	0	0	0	0	0	0	0	7.87036443492132	0	0	0	0	0	0	0	0	0	0	0	7.70735884741879	0	0	0	0	0	7.71424523300403	7.69348667283724	7.51569955362196	7.85174875675397	7.87651666190291	0	0	0	0	0	0	0	0	0	0
CXADR_FAM3C	0	0	0	0	0	0	0	0	0	9.965784	0	0	9.965784	0	9.965784	0	0	0	0	0	0	0	0	0	0	0	0	0	9.965784	9.965784	9.965784	9.965784	0	9.965784	0	0	9.965784	0	9.965784	0	0	0	0	0	0	9.965784	0	9.965784	0
EGFR_HBEGF	0	0	0	0	0	0	0	0	0	8.42626447004001	8.43462794297464	8.43045226700344	8.42206448151073	8.42206448151073	8.42206448151073	0	0	0	0	0	0	0	0	0	0	0	0	0	0	0	0	0	7.63662433588156	0	0	0	0	0	0	0	0	0	7.64385590511264	0	0	0	0	0	0
EPHA4_EFNB1	0	8.85798071046549	0	0	0	8.94251422067715	0	0	0	0	0	0	0	0	0	8.13442603555884	0	0	0	8.26678625603281	0	0	0	0	0	0	9.8872203308063	0	0	0	0	0	0	0	0	0	0	0	0	0	0	0	0	0	0	0	0	0	0
ACVR1_BMPR2_BMP7	0	0	0	0	0	0	0	0	0	0	0	0	0	0	0	0	8.2479272287815	0	0	0	0	0	0	0	0	0	0	0	8.29920773372519	0	0	0	0	0	8.17492539783859	8.44708294154756	0	7.80089961525822	8.04439383469636	0	0	0	0	0	0	0	0	0	0
ACVR_1A2B receptor_BMP7	0	0	0	0	0	0	0	0	0	0	0	0	0	0	0	0	8.2479272287815	0	0	0	0	0	0	0	0	0	0	0	8.29920773372519	0	0	0	0	0	8.17492539783859	8.44708294154756	0	7.80089961525822	8.04439383469636	0	0	0	0	0	0	0	0	0	0
NRG1_LSR	7.25738755803056	0	7.92481221894369	0	0	7.74146670173906	8.01122697076117	7.88264276469975	0	0	0	0	0	7.33091659345253	0	0	0	0	0	0	0	0	0	0	0	0	0	0	0	0	0	0	0	0	0	0	0	7.97727963883783	0	0	0	0	0	0	0	0	0	0	0
ESAM_ESAM	0	0	0	0	0	0	0	0	0	0	0	0	0	0	0	8.1137418813871	0	7.98299329003222	8.357551719956	0	0	0	0	7.98299329003222	8.357551719956	0	0	0	0	0	0	0	0	0	0	0	0	0	0	7.83920350343486	8.2479272287815	0	0	0	8.2479272287815	0	0	0	8.566053753509
VEGFA_KDR	0	8.75488721750138	0	0	0	0	0	0	0	0	0	0	0	0	0	0	0	0	0	0	0	0	0	0	0	10.347621083906	0	0	0	0	0	0	0	0	0	0	0	0	0	0	0	0	0	0	0	0	0	0	0
FLT1 complex_VEGFA	0	0	0	0	0	0	0	0	8.75488721750138	0	0	0	0	0	0	0	0	0	0	10.347621083906	0	0	0	0	0	0	0	0	0	0	0	0	0	0	0	0	0	0	0	0	0	0	0	0	0	0	0	0	0
BMR1A_AVR2B_BMP8A	0	0	9.87651666190291	0	0	9.59618947148232	0	0	0	0	0	0	0	0	0	0	8.65463574386588	0	0	0	0	0	0	0	0	0	0	0	8.85798071046549	0	0	8.21916823580007	0	0	8.965784	9.04712362745194	8.75154377442701	9.34651344850355	8.90388156107409	0	0	8.38370400781196	0	0	0	0	0	0	0
JAG1_NOTCH2	0	0	0	9.42206448151073	9.47370546495733	0	0	0	0	0	0	0	0	0	0	0	0	0	0	0	0	0	0	0	0	0	0	0	0	0	0	0	0	0	0	0	0	0	0	0	0	0	0	0	0	0	9.48179914700366	0	0
PDGFR complex_PDGFD	0	0	0	0	0	0	0	0	0	0	0	0	0	0	0	0	0	0	0	0	0	0	0	0	8.79116260389293	0	0	0	0	0	0	0	0	0	0	8.47573314630431	0	0	0	0	0	0	0	0	0	0	0	0	0
PDGFRB_PDGFD	0	0	0	0	0	0	0	0	0	0	0	0	0	0	0	0	0	0	0	0	0	0	0	0	8.79116260389293	0	0	0	0	0	0	0	0	0	0	8.47573314630431	0	0	0	0	0	0	0	0	0	0	0	0	0
NRP2_VEGFA	0	0	0	0	0	0	0	0	9.965784	0	0	0	0	0	0	0	0	0	0	9.965784	0	0	0	0	0	0	0	0	0	0	0	0	0	0	0	0	0	0	0	0	0	0	0	0	0	0	0	0	0
SEMA3E_PLXND1	0	0	0	0	0	0	0	0	0	0	0	0	0	0	0	0	0	0	0	0	0	0	0	10.0375466693001	10.3117480303429	9.03066685158485	9.1267041881811	0	0	0	0	0	0	0	0	0	0	0	0	0	0	0	0	0	0	0	0	0	0
LGALS9_CD44	0	6.72792016990111	0	0	0	0	0	0	0	0	0	0	0	0	0	0	0	0	0	0	0	0	0	0	0	0	0	0	0	0	0	0	0	0	0	0	0	0	0	0	0	0	0	0	0	0	0	0	0
COPA_SORT1	0	0	0	0	0	5.39231713811667	0	0	0	0	0	0	0	0	0	0	0	0	0	0	0	0	0	0	0	0	0	0	0	0	0	0	0	0	0	0	0	0	0	0	0	0	0	0	0	0	0	0	0
CD46_JAG1	0	0	0	0	0	0	0	0	0	4.2479272287815	3.45943133397521	3.58496221605907	0	0	4.08746255658825	0	0	0	0	0	0	0	0	0	0	0	0	0	0	0	0	0	4.08746255658825	0	0	0	0	0	0	0	0	0	3.16992471678022	0	0	0	0	0	0
PDGFB_LRP1	0	0	0	0	0	9.32867464266586	0	0	0	0	0	0	0	0	0	0	0	0	0	9.33315506564853	0	0	0	0	0	0	0	0	0	0	0	0	0	0	0	0	0	0	0	0	0	0	0	0	0	0	0	0	0
COL5A2_a2b1 complex	0	0	0	0	0	0	0	0	0	0	0	0	0	0	0	8.1848750582462	0	0	0	0	0	0	0	0	0	0	0	0	0	0	0	0	0	0	0	0	0	0	0	0	0	0	0	0	0	0	0	0	0
EPHB2_EFNA5	0	0	0	0	0	0	0	0	0	8.9218406524124	0	0	0	0	9.18982427421793	0	0	0	0	0	0	0	0	0	0	0	0	8.36194348907315	8.0279057119078	0	0	9.11634367657538	0	0	0	0	0	0	8.49185281166759	0	0	0	0	0	0	0	0	8.28077048546852	0
PECAM1_CD38	0	0	0	0	0	0	0	0	0	0	0	0	0	0	0	10.1357090014423	0	0	0	0	0	0	0	8.07681531238874	7.94836694692259	0	0	0	0	0	0	0	0	0	0	0	0	0	0	0	0	0	0	0	0	0	0	0	0
PDGFB_PDGFRA	0	0	0	9.85018655298369	10.0927568562578	0	7.4008791516201	0	0	0	0	0	0	0	0	0	0	9.91139170318137	10.1459318611584	0	7.70735884741879	0	0	0	0	0	0	0	0	0	0	0	0	0	0	0	0	0	0	0	0	0	0	0	0	0	0	0	0
COL27A1_a1b1 complex	0	0	0	0	0	0	0	0	0	0	0	0	0	0	0	0	0	0	0	0	0	0	0	0	0	9.06877799332332	0	0	0	0	0	0	0	0	0	0	0	0	0	0	0	0	0	0	0	7.99999971533791	0	0	0
BMR1A_AVR2B_BMP6	0	10.3826237419128	0	0	0	0	0	0	0	0	0	0	0	0	0	9.63843562932838	0	0	0	0	0	0	9.74483355283746	9.80413073652123	9.85174875675397	9.68999768675736	10.0306668515849	9.77148918483851	0	0	0	0	0	0	0	0	0	0	0	0	0	0	0	0	0	0	0	0	0
EPHB2_EFNB2	0	0	0	0	0	0	0	0	0	7.92481221894369	0	0	0	0	8.41785223022381	0	0	0	0	0	0	0	9.08746255658825	0	0	0	0	9.32867464266586	0	7.76155094778239	8.00562426453179	0	7.8201786777531	0	0	0	0	0	0	0	0	0	0	0	0	0	0	8.30378046351501	0
COL18A1_a2b1 complex	0	0	0	0	0	0	0	0	0	0	0	0	0	0	0	8.92777767742025	0	0	0	0	0	0	0	0	0	8.50382545333366	0	0	0	0	0	0	0	0	0	0	0	0	0	0	0	0	0	0	0	0	0	0	0
PROS1_AXL	0	0	0	0	0	8.0279057119078	0	0	0	0	0	0	0	0	0	0	0	0	0	8.47977997936701	0	0	0	0	0	0	0	0	0	0	0	0	0	0	0	0	0	0	0	0	0	8.53138117585423	0	0	0	0	0	0	0
CD44_FGFR2	0	0	0	0	0	0	0	0	9.68650024252113	0	0	0	0	0	0	0	0	0	9.6829942990196	9.69522800683366	9.71938853627999	0	0	0	0	0	0	0	0	0	0	0	0	0	0	0	0	0	0	0	0	0	0	0	0	0	0	0	0
VWF_aVb3 complex	0	0	0	8.12928273228288	8.22881840583379	0	8.06608890579568	7.79441558168802	0	0	0	0	0	0	0	0	0	0	0	0	0	0	0	0	0	0	0	0	0	0	0	0	0	0	0	0	0	0	0	0	0	0	0	0	0	0	0	0	0
LGR4_RSPO3	0	8.84862265576725	0	0	0	0	0	0	0	0	0	0	0	0	0	0	0	0	0	0	0	0	8.78790227472934	8.84235005875172	8.77148918483851	8.74146670173906	0	0	0	0	0	0	0	0	0	0	0	0	0	0	0	0	0	0	0	0	0	0	0
TGFB3_TGFBR3	0	0	0	0	0	0	0	0	0	0	0	9.965784	0	0	0	0	0	0	0	0	0	0	0	0	9.965784	0	0	0	0	0	0	0	0	0	0	0	0	0	0	0	0	0	0	0	9.965784	0	0	0	9.965784
BMPR1A_BMPR2_BMP8A	0	0	9.04984826478847	0	0	8.50382545333366	0	0	0	0	0	0	0	0	0	0	8.56985532366886	0	0	0	0	0	0	0	0	0	0	0	9.55458856701555	0	0	9.19475656976016	0	0	9.30833874547732	9.56795579075338	9.28540193420016	9.19475656976016	9.44914836071335	0	0	8.87036443492132	0	0	0	0	0	0	0
NRP1_VEGFA	0	0	0	0	0	0	0	0	9.965784	0	0	0	0	0	0	0	0	0	0	9.965784	0	0	0	0	0	0	0	0	0	0	0	0	0	0	0	0	0	0	0	0	0	0	0	0	0	0	0	0	0
CDH1_a2b1 complex	0	9.18735178853841	0	0	0	0	0	0	0	0	0	0	0	0	0	0	0	0	0	0	0	0	10.2070140355154	8.39660449651977	0	10.1215332326779	9.48984767577721	10.0223675283664	0	0	0	0	0	0	0	0	0	0	0	0	0	0	0	0	0	0	0	0	0
NOTCH2_JAG2	1.99999971533791	0	0	0	0	0	0	0	9.965784	9.965784	9.965784	1.99999971533791	9.965784	9.965784	9.965784	0	0	0	0	0	0	0	0	9.965784	6.20945308096686	0	0	0	0	0	0	0	0	0	0	0	0	0	0	0	0	9.965784	9.965784	9.965784	0	0	0	0	0
EGFR_NRG1	0	0	0	0	0	0	0	0	0	0	9.965784	9.965784	9.965784	0	9.965784	0	0	0	0	0	0	0	0	0	0	0	0	0	0	0	0	0	0	0	0	0	0	0	0	0	0	0	9.965784	0	0	0	0	0	0
ACVR_1A2A receptor_BMP8A	0	0	0	0	0	0	0	0	0	0	0	0	0	0	0	0	8.72792016990111	0	0	8.00562426453179	0	0	0	0	0	0	0	0	8.63662433588156	0	0	7.85174875675397	0	0	8.64024465156026	8.62935633541752	8.53915852644594	8.71424523300404	8.72792016990111	0	0	7.86418585999219	0	0	0	0	0	0	0
BMR1A_ACR2A_BMP8A	0	0	0	0	0	0	0	0	0	0	0	0	0	0	0	0	8.72792016990111	0	0	8.00562426453179	0	0	0	0	0	0	0	0	8.63662433588156	0	0	7.85174875675397	0	0	8.64024465156026	8.62935633541752	8.53915852644594	8.71424523300404	8.72792016990111	0	0	7.86418585999219	0	0	0	0	0	0	0
ACVR1_BMPR2_BMP8A	0	0	0	0	0	0	0	0	0	0	0	0	0	0	0	0	8.94544355171582	0	0	8.353146540836	0	0	0	0	0	0	0	0	8.97727963883783	0	0	8.4008791516201	0	0	8.90086652331866	9.07146207789454	8.65463574386588	8.68650024252113	8.82336695538415	0	0	8.28540193420016	0	0	0	0	0	0	0
ACVR_1A2B receptor_BMP8A	0	0	0	0	0	0	0	0	0	0	0	0	0	0	0	0	8.94544355171582	0	0	8.353146540836	0	0	0	0	0	0	0	0	8.97727963883783	0	0	8.4008791516201	0	0	8.90086652331866	9.07146207789454	8.65463574386588	8.68650024252113	8.82336695538415	0	0	8.28540193420016	0	0	0	0	0	0	0
LGALS9_LRP1	0	0	0	0	0	9.32867464266586	0	0	0	0	0	0	0	0	0	0	0	0	0	0	0	0	0	0	0	0	0	0	0	0	0	0	0	0	0	0	0	0	0	0	0	0	0	0	0	0	0	0	0
FAM3C_CLEC2D	0	1.58496221605907	0	0	0	0	0	0	0	0	0	0	0	0	0	0	0	0	0	0	0	0	1.99999971533791	1.99999971533791	2.99999971533791	9.965784	0	9.965784	0	0	0	0	0	0	0	0	0	0	0	0	0	0	0	0	0	0	0	0	0
BMR1A_ACR2A_BMP6	0	0	0	0	0	0	0	0	0	0	0	0	0	0	0	9.67595674827966	0	0	0	0	0	0	9.62935633541752	9.63299491248087	9.62570855840238	9.58308248284085	9.66888469960416	9.67771935697892	0	0	0	0	0	0	0	0	0	0	0	0	0	0	0	0	0	0	0	0	0
ACVR_1A2A receptor_BMP6	0	0	0	0	0	0	0	0	0	0	0	0	0	0	0	9.67595674827966	0	0	0	0	0	0	9.62935633541752	9.63299491248087	9.62570855840238	9.58308248284085	9.66888469960416	9.67771935697892	0	0	0	0	0	0	0	0	0	0	0	0	0	0	0	0	0	0	0	0	0
ADGRL1_NRG1	0	0	0	0	0	0	0	0	9.965784	9.965784	0	0	0	0	9.965784	0	0	0	0	0	9.965784	0	0	0	0	0	0	0	0	0	0	0	9.965784	0	0	0	0	0	0	0	0	0	0	0	0	0	0	0	0
EFNB2_EPHB4	0	8.22400138953602	0	0	0	0	0	0	8.94544355171582	0	0	0	0	0	0	9.22881840583379	0	0	0	0	0	0	0	8.09803179829844	8.29462046422954	8.0279057119078	8.13955106773671	0	0	0	0	0	0	0	0	0	0	0	0	0	0	0	0	0	0	0	0	0	0
NRG1_LGR4	7.87036443492132	0	0	7.86418585999219	0	0	0	0	0	0	0	0	0	7.92481221894369	0	0	0	0	0	0	0	0	0	0	0	0	0	0	0	0	0	0	0	0	0	0	0	0	0	0	0	0	0	0	0	0	7.91886295261251	0	0
COL4A1_a2b1 complex	0	0	0	0	0	0	0	0	0	0	0	0	0	0	0	10.562242139559	0	0	0	0	0	0	0	0	0	0	0	0	0	0	0	0	0	0	0	0	0	0	0	0	0	0	0	0	0	0	0	0	0
EPO_EFNB2	0	8.98299329003222	0	0	0	0	0	0	0	0	0	0	0	0	0	0	0	0	0	0	0	0	9.08746255658825	9.03066685158485	9.00562426453179	0	9.01959044369579	9.10590822390907	0	0	0	0	0	0	0	0	0	0	0	0	0	0	0	0	0	0	0	0	0
TGFB3_TGFbeta receptor2	0	0	0	0	0	0	0	0	0	0	0	0	0	0	0	0	0	0	0	0	0	0	0	0	8.23361939209761	0	0	0	0	0	0	0	0	0	0	8.29001856227053	0	0	0	0	0	0	0	0	0	0	0	0	8.43462794297464
ACVR_1A2B receptor_BMP6	0	0	0	0	0	0	0	0	0	0	0	0	0	0	0	9.79279000963898	0	0	0	0	0	0	9.81217702085236	9.76818404011484	9.86573298618967	9.63843562932838	9.65463574386588	9.72621787467011	0	0	0	0	0	0	0	0	0	0	0	0	0	0	0	0	0	0	0	0	0
NRP2_SEMA3F	0	0	0	0	0	0	0	0	4.80735463739552	0	0	0	0	0	0	5.04439383469637	5.72792016990111	4.08746255658825	3.45943133397521	6.55458856701555	0	5.78135942886257	0	0	0	0	0	0	0	0	0	0	0	0	0	0	0	0	0	0	0	0	0	0	0	0	0	0	0
ACVR1_BMPR2_BMP6	0	0	0	0	0	0	0	0	0	0	0	0	0	0	0	9.79279000963898	0	0	0	0	0	0	9.81217702085236	9.76818404011484	9.86573298618967	9.63843562932838	9.65463574386588	9.72621787467011	0	0	0	0	0	0	0	0	0	0	0	0	0	0	0	0	0	0	0	0	0
BMPR1A_BMPR2_BMP6	0	9.85174875675397	0	0	0	0	0	0	0	0	0	0	0	0	0	9.59618947148232	0	0	0	0	0	0	10.1636493913537	10.0070269822319	10.1724272239834	9.99152156141361	9.93663765434048	10.0953967381305	0	0	0	0	0	0	0	0	0	0	0	0	0	0	0	0	0	0	0	0	0
EGFR_TGFB1	0	0	0	0	0	0	0	0	0	0	0	0	0	0	0	0	0	0	0	0	0	0	9.94544355171582	7.13955106773671	6.20945308096686	9.84077763893297	9.03066685158485	9.7210989040451	0	0	0	0	0	0	0	0	0	0	0	0	9.965784	0	0	0	0	0	0	0	9.965784
FN1_a2b1 complex	0	0	0	0	0	0	0	0	0	0	0	0	0	0	0	10.0834790426698	0	0	0	0	0	0	0	10.0754788648259	10.5028315194047	0	0	0	0	0	0	0	0	0	0	0	0	0	0	0	0	0	0	0	0	0	0	0	0
VEGFA_FLT1	0	10.3219278102253	0	0	0	0	0	0	0	0	0	0	10.6960978862938	0	0	0	0	0	0	0	0	0	0	0	0	11.070791524761	0	0	0	0	0	0	0	0	0	0	10.236013907238	0	0	0	0	0	0	0	0	10.5018369002402	0	0	0
EPO_EPHB4	0	8.07146207789454	0	0	0	0	0	0	0	7.64385590511264	7.47573314630431	7.4008791516201	0	7.44294321118664	7.68650024252113	0	0	0	0	0	0	0	8.26209456070809	8.15481782439002	8.10852417211608	0	8.13442603555884	8.29462046422954	0	0	0	0	0	0	0	0	0	0	0	0	0	0	0	0	0	0	0	0	0
COL4A2_a2b1 complex	0	0	0	0	0	0	0	0	0	0	0	0	0	0	0	10.2094530809669	0	0	0	0	0	0	0	0	0	0	0	0	0	0	0	0	0	0	0	0	0	0	0	0	0	0	0	0	0	0	0	0	0
COL5A2_a1b1 complex	0	0	0	0	0	0	0	0	0	0	0	0	0	0	0	8.82972245042397	0	0	0	0	0	0	0	0	0	0	0	0	0	0	0	0	0	0	0	0	0	0	0	0	0	0	0	0	0	0	0	0	0
FGFR2_EPHA4	10.3151492775942	10.0901121350022	0	0	0	0	10.7788981913463	0	9.46760526542091	9.60547923339958	9.60917845347989	9.965784	9.94982642609702	10.0209796542421	9.62570855840238	0	0	0	0	0	10.217957413202	0	0	0	9.67242505730941	9.65463574386588	9.74146670173906	0	0	0	0	0	10.3014959103205	0	0	0	0	0	0	0	0	0	10.303780463515	0	0	0	0	0	0
TGFB3_TGFbeta receptor1	0	0	0	0	0	0	0	0	0	0	0	0	0	0	0	0	0	0	0	0	0	0	0	0	7.87036443492132	0	0	0	0	0	0	0	0	0	0	7.965784	0	0	0	0	0	0	0	0	7.85174875675397	0	0	0	7.700439433479
EFNA5_EPHA4	9.46556612014731	9.03066685158485	0	0	0	0	10.2167455735332	0	8.8201786777531	8.91587909417369	8.76155094778239	0	9.60177050374562	8.81698333859329	0	0	0	0	0	0	9.86882227011291	0	0	0	0	9.21188800988392	0	0	0	0	0	0	9.91587909417369	0	0	0	0	0	0	0	0	0	9.84077763893297	0	0	0	0	0	0
COL18A1_a1b1 complex	0	0	0	0	0	0	0	0	0	0	0	0	0	0	0	9.34429562325373	0	8.52747672139831	8.78463456089543	8.56224213955898	0	0	0	0	0	9.04165886697513	0	0	0	0	0	0	0	0	0	0	0	0	0	0	0	0	0	0	0	0	0	0	0
EFNB2_EPHA4	8.86108662133331	0	0	0	0	0	9.88874296423617	0	9.58120029726287	0	8.77807684487327	8.90388156107409	8.73470933556375	8.80735463739552	0	9.1848750582462	0	0	0	0	10.2865574769459	0	0	0	0	0	0	0	0	0	0	0	0	0	0	0	0	0	0	0	0	0	9.84862265576725	0	0	0	0	0	0
LAMC1_a2b1 complex	0	0	0	0	0	0	0	0	0	0	0	0	0	0	0	9.94104732167849	0	0	0	0	0	0	0	0	9.59618947148232	10.3761251046141	0	0	0	0	0	0	0	0	0	0	0	0	0	0	0	0	0	0	0	0	0	0	0
LRP6_CKLF	0	0	0	8.43462794297464	0	0	8.55842042860658	8.57742854337366	0	0	0	0	0	0	0	0	0	8.4008791516201	0	0	8.52356167139492	8.54689417522555	0	0	0	0	0	0	0	8.55842042860658	0	0	8.66888469960416	8.68999768675736	0	0	0	0	0	0	0	0	8.49984560242112	8.51963596818113	8.57364690283123	0	0	8.42626447004001	0
NECTIN2_NECTIN3	0	1.99999971533791	0	1.58496221605907	0.999999715337912	0	0	9.965784	0	0	0	0	0	0	0	2.32192781022527	0	0	0	0	0	0	6.55458856701555	3.32192781022527	1.99999971533791	0	0	5.12928273228288	0	6.53915852644594	0	0	0	9.965784	0	0	0	0	0	0	0	0	0	0	0	0	0	5.08746255658825	0
LGALS9_CD47	0	2.99999971533791	0	0	2.58496221605907	0	0	0	0	0	0	0	0	0	0	0	0	0	0	0	0	0	0	0	0	0	0	0	0	0	0	0	0	0	0	0	0	0	0	0	0	0	0	0	0	0	0	0	0
LGALS9_SLC1A5	9.965784	9.965784	9.965784	0	0	9.965784	9.965784	9.965784	0	0	0	0	0	0	0	0	0	0	0	9.965784	0	0	0	0	0	0	0	0	0	0	0	9.965784	0	0	0	0	0	9.965784	0	0	0	9.965784	0	0	0	0	0	0	0
TGFB1_TGFBR3	0	0	0	0	0	0	0	0	9.965784	0	0	9.965784	0	0	0	9.965784	0	9.965784	9.965784	9.965784	0	0	0	0	9.965784	0	0	0	0	0	0	0	0	0	0	0	0	0	0	0	0	0	0	0	9.965784	0	0	0	9.965784
DLK1_NOTCH2	0	0	0	0	0	0	0	0	9.67242505730941	0	0	0	0	0	0	9.63481076550963	9.72792016990111	10.3208002642195	10.348727869569	9.64565814774662	9.6969672415722	9.78299792425833	0	0	0	0	0	0	0	0	0	0	0	0	0	0	0	0	0	0	0	0	0	0	0	0	0	0	0
CADM1_NECTIN3	0	-2.84662087679521e-07	0	-2.84662087679521e-07	9.965784	0	0	1.58496221605907	0	0	0	0	0	0	0	0	0	0	0	0	0	0	-2.84662087679521e-07	0	0	0	9.965784	9.965784	0	0.999999715337912	9.965784	0	0	1.58496221605907	0	0	0	0	0	0	0	0	0	0	0	0	9.965784	9.965784	0
LGALS9_DAG1	8.46760526542091	8.46760526542091	8.46760526542091	8.46760526542091	8.46760526542091	8.48381549260217	9.965784	9.965784	0	0	0	0	0	0	0	0	0	0	0	8.41785223022381	0	0	0	0	0	0	0	0	0	0	0	0	0	0	8.47167492972996	0	0	9.79441558168802	0	0	0	8.48783974916096	0	0	0	0	0	0	0
TGFB2_TGFBR3	0	0	0	0	0	0	0	0	0	0	0	6.62935633541752	6.88264276469975	0	0	0	0	0	0	0	0	0	0	0	7.62935633541752	7.76818404011484	0	0	0	0	0	0	0	0	0	0	0	0	0	0	0	0	0	0	7.42626447004001	7.57742854337366	0	0	7.23840445466299
PLXNB1_SEMA4D	9.95855243076892	0	9.73470933556375	10.0347986779152	9.94251422067715	9.61838521759652	10.0593441761623	9.90237482982394	0	0	9.31514927759421	9.7380919749584	0	9.83920350343486	9.20945308096686	0	0	0	0	0	0	0	0	0	0	0	0	0	0	0	0	0	0	0	0	9.47370546495733	0	9.59618947148232	0	9.43254161572617	9.29001856227053	0	9.46964153257743	9.2264119081267	9.82654820262883	9.22881840583379	9.9233272007571	9.33539007003184	9.71938853627999
FN1_aVb5 complex	9.90989279910795	0	0	0	0	0	0	0	10.217957413202	0	10.2106710591235	10.6045529444169	0	0	0	0	9.99293805150373	0	9.9307370529008	10.1922925298087	9.98441817413905	0	0	0	0	0	0	0	0	0	0	0	0	0	9.98441817413905	10.4356699762745	0	0	0	0	9.9218406524124	10.1836350968111	9.9758476833447	0	0	0	0	0	10.3901686715381
DSC2_DSG2	8.76818404011484	0	0	8.7073588474188	0	0	0	0	0	8.69348667283724	9.01402018565285	9.26444231556451	8.68650024252113	8.95128443030488	0	0	0	0	0	0	0	0	0	0	8.68999768675736	0	0	0	0	0	0	0	0	0	8.81057135007906	9.09539673813047	0	8.7380919749584	0	8.96289572067517	8.89481747864586	0	8.7073588474188	8.90689031094643	9.22158683660272	0	8.89784517134342	0	9.1649066420136
FN1_a3b1 complex	0	0	0	0	9.90538672035604	10.1711765129897	0	0	0	0	0	0	0	0	0	10.0525677661421	0	9.99293805150373	10.2143188361387	10.4335851564884	0	0	0	10.0443938346964	10.479779979367	0	0	0	0	0	0	0	0	0	0	0	0	0	0	9.98441817413905	10.2070140355154	10.4273125594729	0	0	10.4356699762745	0	0	0	10.6026985803559
LAMP1_FAM3C	-2.84662087679521e-07	0	9.965784	9.965784	9.965784	9.965784	0	9.965784	0	9.965784	9.965784	0	9.965784	9.965784	9.965784	0	0	9.965784	9.965784	0	0	0	0	0	0	0	0	0	9.965784	9.965784	9.965784	0	0	9.965784	0	0	9.965784	9.965784	9.965784	9.965784	9.965784	0	0	0	9.965784	9.965784	9.965784	9.965784	9.965784
FGFR1_FGFR2	2.80735463739552	0	0	0	2.99999971533791	9.965784	9.965784	0	1.58496221605907	9.965784	9.965784	9.965784	1.58496221605907	9.965784	9.965784	0	0	0	0	0	0	0	0	0	0	0	0	0	0	0	0	0	0	0	0	0	0	0	0	0	0	0	0	0	0	0	0	0	0
FGFR2_XPR1	10.1421067726405	10.053925596869	10.0443938346964	10.0579914380971	10.0701206598147	9.99717919627553	10.0606956470255	10.0821487566918	0	0	0	9.74146670173906	9.72451356845786	9.80735463739552	0	0	0	0	0	0	0	0	0	0	9.62388120535137	9.60362606032411	9.69348667283724	0	0	0	0	0	0	0	0	9.60917845347989	9.59058676525295	9.68123812711572	0	0	0	0	0	0	9.6275335998107	9.60917845347989	9.69870438210826	0	9.64385590511264
LGALS9_COLEC12	0	1.99999971533791	0	0	0	0.999999715337912	0	0	0	0	0	0	0	0	0	0	0	0	0	0	0	0	0	0	0	0	0	0	0	0	0	0	0	0	0	0	0	0	0	0	0	0	0	0	0	0	0	0	0
TGFB1_TGFbeta receptor2	0	0	0	0	0	0	0	0	0	0	0	0	0	0	0	8.29001856227053	8.34429562325373	8.21916823580007	8.48783974916096	0	0	0	0	0	8.19475656976016	0	0	0	0	0	0	0	0	0	0	8.25266514778816	0	0	0	0	0	0	0	0	8.11894078806142	0	0	0	8.40514117847426
CADM1_CADM1	3.80735463739552	0	4.08746255658825	0	0	0	4.52356167139493	4.32192781022527	0	3.80735463739552	0	0	0	3.32192781022527	3.45943133397521	0	0	0	0	0	0	0	0	0	0	0	0	0	3.99999971533791	4.16992471678022	4.80735463739552	3.80735463739552	4.52356167139493	4.2479272287815	3.700439433479	3.58496221605907	9.965784	3.58496221605907	3.700439433479	0	0	0	4.32192781022527	3.99999971533791	0	0	3.80735463739552	3.90689031094643	0
TGFB2_TGFbeta receptor2	0	0	0	0	0	0	0	0	0	0	0	0	0	0	0	0	0	0	0	0	0	0	0	0	8.6036260603241	8.6969672415722	0	0	0	0	0	0	0	0	0	8.64385590511264	8.7380919749584	0	0	0	0	0	0	0	8.54689417522555	8.64385590511264	0	0	8.76155094778239
FN1_aVb3 complex	0	0	0	0	0	0	0	0	0	0	0	0	0	0	0	0	0	10.0154147677246	10.0430269989325	0	9.99999971533791	9.93369037029015	0	0	0	0	0	0	0	0	0	0	0	0	0	0	0	0	0	10.0070269822319	10.0347986779152	0	9.99010367919541	9.92481221894369	10.4522409557687	0	0	0	10.4726905545807
TGFB2_TGFbeta receptor1	0	0	0	0	0	0	0	0	0	0	0	0	0	0	0	0	0	0	0	0	0	0	0	0	8.32642920246021	8.44294321118664	0	0	0	0	0	0	0	0	0	8.4008791516201	8.50779435553661	0	0	0	0	0	0	0	8.31741232910278	8.43462794297464	0	0	8.20945308096686
COL4A2_a1b1 complex	0	0	0	0	0	0	0	0	0	0	0	0	0	0	0	10.3955338508002	0	10.0579914380971	10.1522845576445	10.0701206598147	0	0	0	0	0	0	0	0	0	0	0	0	0	0	0	0	0	0	0	0	0	0	0	0	0	0	0	0	0
LAMC1_aVb3 complex	0	0	0	0	0	0	0	0	0	0	0	0	0	0	0	0	0	9.86573298618967	9.89633211924785	0	9.84862265576725	9.77478677493909	0	0	0	0	0	0	0	0	0	0	0	0	0	0	0	0	0	0	0	0	0	0	0	10.3219278102253	0	0	0
EGFR_COPA	0	0	0	0	0	0	0	0	0	9.965784	9.965784	9.965784	9.965784	9.965784	3.16992471678022	0	0	0	0	0	0	0	0	9.965784	9.965784	9.965784	0	1.99999971533791	0	0	0	0	0	0	0	0	9.965784	0	2.99999971533791	9.965784	9.965784	9.965784	0	0	9.965784	9.965784	0	3.32192781022527	9.965784
FGFR1_NCAM1	0	0	0	0	0	0	9.965784	0	0	0	0	0	0	0	0	0	0	0	0	0	9.965784	0	0	0	0	0	0	0	0	0	0	0	9.965784	0	0	0	0	0	0	0	0	0	9.965784	0	0	0	0	0	0
COL4A1_a1b1 complex	0	0	0	0	0	0	0	0	0	0	0	0	0	0	0	10.7108061490373	0	10.4450145612063	10.5176691034717	10.4542990089578	0	0	0	0	0	0	0	0	0	0	0	0	0	0	0	0	0	0	0	0	0	0	0	0	0	0	0	0	0
TGFB1_TGFbeta receptor1	0	0	0	0	0	0	0	0	0	0	0	0	0	0	0	7.94251422067715	8.03342271687536	7.92481221894369	7.78790227472934	7.87651666190291	7.96000164740599	7.98868440211008	0	0	7.8201786777531	0	0	0	0	0	0	0	0	0	0	7.91886295261251	0	0	0	0	0	0	0	0	7.80735463739552	0	0	0	0
LAMC1_a6b1 complex	0	9.66355781955519	0	0	0	0	0	0	9.82654820262883	0	0	0	10.29232134814	0	0	10.4008791516201	10.0181998941511	0	9.73978032511117	10.0292869423062	0	9.7731389220576	9.9729795014042	9.96866650853312	10.1586094035524	10.7304698525221	0	9.66711125741294	0	0	0	0	0	0	0	9.69174323450919	10.4335851564884	0	0	0	0	0	0	0	0	0	0	0	0
FN1_a5b1 complex	10.1357090014423	0	0	0	9.93663765434048	0	10.0457593767206	0	10.4030117389129	0	10.3966044965198	10.7481925649274	10.0334227168754	0	0	10.0265231578577	10.0112269707612	10.0967148698264	10.2407910474999	9.91438484749336	10.3286746426659	10.1711765129897	0	10.0181998941511	10.4604556116475	0	0	0	0	0	0	0	0	0	10.002814730945	10.4491483607133	0	0	0	10.0887879540548	10.2336193920976	0	10.3219278102253	10.1636493913537	10.5127401781414	0	0	0	10.6220515347943
LGALS9_PTPRK	9.965784	9.965784	9.965784	9.965784	9.965784	9.965784	9.965784	9.965784	0	0	0	0	0	0	0	0	0	0	0	0	0	0	0	0	0	0	0	0	0	0	0	0	0	0	1.58496221605907	0	0	9.965784	0	0	0	0	0	0	0	0	0	0	0
FN1_aVb1 complex	0	0	0	0	0	0	0	0	10.2737953145522	0	10.2667862560328	10.6474581417928	0	0	0	10.1761728644454	0	0	0	0	10.1848750582462	0	0	10.1686718334701	10.5736469028312	0	0	0	0	0	0	0	0	0	0	10.4532703493485	0	0	0	0	0	0	10.1774192533271	0	10.4747196618644	0	0	0	10.42626447004
[truncated: 15 more columns]
