# Supplementary material for: Single nuclei RNA-seq of mouse placental labyrinth development
Source: eLife. 2020 Nov 3;9:e60266. doi: 10.7554/eLife.60266 (PMC7669270; doi:10.7554/eLife.60266)
Supplement: Figure 6—source data 1. [file elife-60266-fig6-data1.csv]

	SpT Precursor	SpT	Glycogen Cells	SynTII	SynTI	S-TGC	S-TGC Precursor	LaTP	LaTP 2	SynTII Precursor	SynTI Precursor	JZP 1	JZP 2
Nuak1 (24)	0.468719827	-0.09107905	3.005720935	-0.43106172	-0.536116639	0.013427848	-0.35926876	-0.880369791	-0.63609737	-0.726541269	-0.278300528	-0.126999901	0.577966418
Ets2 (15)	0.845241029	0.01493657	2.539245684	-0.552069781	-0.868820282	0.950186142	0.111317051	-0.895090653	-0.761294265	-0.822572845	-0.547112577	-0.50991888	0.495952808
Nfia_extended (19)	0.88443173	0.885141942	2.290420734	-0.039953236	-0.680063708	-0.270000846	-0.60164296	-1.101736935	-0.87717414	-0.949859457	-0.568786718	-0.010106619	1.039330214
Etv6 (75)	1.205444037	0.489393767	2.289030145	-0.446440796	-0.437985833	-0.057961921	-0.474634132	-1.184905851	-0.936465434	-0.739966783	-0.758209596	0.031140077	1.021562318
Tcf4 (82)	0.908449477	0.485314134	2.547909811	-0.445379357	-0.489572937	0.21812109	-0.251413457	-0.992436744	-0.926911664	-0.790976114	-0.84115938	-0.237353114	0.815408256
Meis2_extended (40)	1.765634275	1.280274596	1.684506467	-0.453708512	-0.77084755	-0.003860306	-0.28784737	-1.030656835	-0.840461561	-0.793090446	-0.781637042	-0.377874932	0.609569215
Irf2_extended (79)	1.414983047	1.235604908	2.069599146	-0.1502265	-0.16452092	-0.186141242	-0.559187248	-1.167240453	-1.04342785	-0.754523002	-0.543917428	-0.556720947	0.40571849
Fosl2_extended (225)	1.262692974	2.014507526	1.578565883	0.073032319	-0.275374225	-0.339435844	-0.599243323	-1.052878775	-0.956088354	-0.705652495	-0.646485962	-0.563435288	0.209795564
Creb3l2 (466)	1.29527601	1.688937868	1.710890205	-0.635302751	-0.564301516	0.197211792	-0.237654971	-1.085394239	-0.816503738	-0.988956021	-0.724661694	-0.346610218	0.507069274
Nfkb1 (23)	0.773319341	0.955548046	2.757390084	-0.21601923	-0.651336121	-0.640905597	-0.337029954	-0.765684245	-0.508027716	-0.765870375	-0.381234652	-0.490835932	0.270686353
Stat5a (25)	1.066761354	2.145600436	1.64776106	-0.505953929	-0.558558638	0.073736368	-0.412640089	-0.861693445	-0.868937692	-0.816095452	-0.639685927	-0.443618118	0.17332407
Cebpg_extended (49)	0.503102366	1.051294409	-0.138555242	0.917614163	-1.550062602	1.803241071	0.796508835	-0.708720058	-0.799612102	0.463997358	-1.166496947	-0.794514536	-0.377796713
Usf1_extended (123)	0.392754894	0.332065062	-0.013205539	-0.656701332	-0.851678253	2.716577921	1.172240376	-0.695149271	-0.521770541	-0.733202822	-0.60901255	-0.363376398	-0.169541546
Rcor1_extended (1451)	1.050937031	0.990566672	1.370587714	-0.651535158	-1.237731735	1.482592581	0.451459266	-1.02014295	-0.785334773	-0.905905981	-0.954425363	-0.260610361	0.469543057
Sp3 (228)	1.062185654	0.941857733	0.871677921	-1.038105214	-1.493970786	1.642513844	0.761184484	-0.746334275	-0.593922857	-0.755868871	-0.978223917	-0.107137773	0.434144056
Crem_extended (68)	1.060568901	1.684432629	0.020145551	-1.492735308	-1.768686611	1.309146648	0.496328764	-0.355414841	-0.04264179	-0.644509309	-0.402750168	0.014417444	0.121698089
Jdp2_extended (20)	1.353859824	2.66224881	0.113432616	-1.019046887	-0.626100029	0.291550878	-0.063996127	-0.617191726	-0.58172369	-0.660386973	-0.564472043	-0.269551735	-0.018622919
Nr2f6_extended (54)	0.326090484	-0.247948877	1.415300744	-1.476811262	-1.461115135	-0.503830754	-0.130753819	0.140318083	0.281567666	-0.852904796	-0.400781402	1.358692567	1.552176501
Ppard (25)	0.842779472	0.288314721	2.348061686	-1.018353106	-1.427982632	-0.504096988	-0.422558064	-0.341632203	-0.161098761	-0.615089608	-0.493990165	0.374771321	1.130874327
Zeb1_extended (656)	1.010048993	0.286105152	2.055378369	-0.786824203	-1.405131259	0.108341271	-0.175305091	-0.843698223	-0.557406662	-0.755452555	-0.72127387	0.486140392	1.299077684
Srebf2 (616)	1.053000401	0.93135421	1.368521841	-0.630524192	-2.362466773	-0.346379493	-0.175721339	-0.02085849	-0.170020065	-0.196348371	-0.886813205	0.457836007	0.978419469
Arid5b_extended (15)	0.194047018	-0.844107025	1.291360257	-1.24317632	-0.228139318	0.017083498	-0.341292643	-1.208816266	-0.324081278	-1.131026797	0.945171363	1.468695115	1.404282396
Stat3 (30)	0.598938176	-0.153509128	1.711232367	-0.944780607	-0.64809878	0.953049681	0.322886851	-1.233988644	-0.697909333	-1.257594739	-0.555047711	0.382065124	1.522756743
Elk3 (120)	0.946285534	-0.505918928	1.94933843	-0.682932744	-0.970983035	1.192071824	0.41484692	-1.080102268	-0.682497008	-0.989469296	-0.625300766	0.013051297	1.021610041
Klf8_extended (95)	0.809200441	-0.167054265	1.897235378	-0.715568993	-0.957106839	1.510338627	0.494277737	-0.917059231	-0.701455304	-0.915561689	-0.991910654	-0.11695894	0.771623732
Klf13 (338)	0.563767969	-0.355730481	0.817901236	-0.477771782	-0.727613401	2.358408662	1.012024715	-1.03886689	-0.709969617	-0.889213521	-0.955993387	-0.093034063	0.496090559
Atf6b (75)	1.146594565	2.856234491	0.40687209	-0.363851686	-0.175179823	-0.285091027	-0.402098526	-0.716395276	-0.613928272	-0.726267488	-0.503622715	-0.524004917	-0.099261416
Ddit3 (47)	0.968754251	2.613270979	0.121613621	0.832113456	0.047538194	-0.078123576	-0.403779009	-1.091481415	-0.835370946	-0.72570761	-0.174185086	-0.855497008	-0.419145852
Cux1 (10)	1.570418849	1.967220876	0.872229277	-0.580443314	0.509289294	-1.041200474	-0.954509846	-0.863585987	-0.787940964	-0.849072332	0.093503957	-0.294461107	0.358551771
Creb3l1 (704)	0.979596742	2.931223075	0.271275058	-0.164469547	-0.01907465	-0.15339572	-0.443064411	-0.767653993	-0.715432351	-0.655069073	-0.345244982	-0.626736048	-0.2919541
Atf6 (510)	1.032454345	2.864235423	0.175857048	-0.317097663	0.23450405	-0.127186921	-0.453737993	-0.855804775	-0.71510805	-0.714435028	-0.122955129	-0.661029596	-0.339695711
Xbp1 (505)	1.244585991	2.063631989	1.160653512	-0.184349906	0.561488667	0.073162412	-0.459062755	-1.142615934	-1.08036429	-0.901333178	-0.657232775	-0.747097652	0.068533919
Mitf_extended (300)	1.273747576	2.367449466	0.826568176	-0.259275443	-0.00342337	0.375366648	-0.228269341	-1.171440719	-0.994623632	-0.857031778	-0.486848537	-0.687146876	-0.15507217
Foxp1 (374)	1.115596065	1.807736558	1.312066398	-0.068301889	0.134753377	0.821859441	-0.072440169	-1.216313917	-1.122004932	-0.886192922	-0.886506078	-0.864403282	-0.075848649
Foxo4 (39)	1.421306383	2.004556009	0.34822188	-0.427882388	-0.098794048	1.183328575	0.38127228	-1.003472645	-0.958480564	-0.838891235	-0.710495199	-0.897166416	-0.403502633
Elk4_extended (438)	1.157535963	2.089377767	0.503101496	-0.360271279	-0.506079305	1.332774943	0.297104841	-0.973601304	-0.847437467	-0.816423509	-0.944241434	-0.723481401	-0.208359312
Bhlhe41 (10)	1.101516434	2.997785533	-0.22098472	-0.221757781	-0.717610189	-0.493966816	-0.372301409	-0.541453981	-0.265301886	-0.154054422	-0.414605256	-0.380876861	-0.316388645
Pparg (103)	0.87315451	0.948384338	0.588488615	-0.40305944	-0.193792536	2.156775426	0.70275123	-1.388303894	-0.954510641	-1.108678565	-0.428645885	-0.597323376	-0.195239783
Zbtb7b_extended (432)	1.006992682	0.399547569	1.508374552	0.17162487	-0.309758258	1.715841881	0.294249648	-1.236416806	-1.165679699	-0.884393071	-1.03646926	-0.753238522	0.289324414
Rela_extended (368)	0.989019124	0.551374372	1.006732898	-0.418725865	-0.243598238	2.068813824	0.650995558	-1.235155959	-1.025451499	-1.018444749	-0.865710307	-0.614816351	0.154967194
Foxj2 (95)	0.266094358	0.194712466	0.228314596	0.298702256	0.946159312	2.386251971	0.711436247	-0.947866441	-0.996271954	-0.300799275	-0.905490918	-1.144867862	-0.736374758
Mnt_extended (61)	0.87983051	2.343371952	0.056761248	0.249853197	1.213178516	0.179843667	-0.332945119	-1.093530301	-0.831220613	-0.843370833	-0.162733227	-0.992555563	-0.666483432
Bhlhe40_extended (521)	0.589803131	1.589954206	-0.177315308	-0.12219114	0.650008033	1.943808777	0.626884031	-1.03863599	-0.957438355	-0.888037746	-0.625853322	-0.941343816	-0.649642501
Foxk1 (395)	0.874244328	1.623316358	0.191563403	-0.09620882	0.600155358	1.755677128	0.337904284	-1.129002629	-1.098695091	-0.819864658	-0.514708234	-1.076892983	-0.647488443
Jun_extended (130)	1.102828767	2.490944096	0.286676474	-0.017267239	0.827185519	0.101921734	-0.295556023	-1.083329192	-0.911544777	-0.782583931	-0.385321857	-0.839262523	-0.494691049
Runx2 (11)	-0.132442083	3.197394875	-0.474143327	-0.473389084	-0.634941379	-0.20470783	-0.302827893	0.294891466	-0.306649693	-0.056729343	0.15582028	-0.550465114	-0.511810874
Esrrg (40)	0.172949684	3.272546524	-0.465313518	-0.353384944	-0.174710091	-0.53562337	-0.403900017	-0.13564672	-0.247449403	-0.297340658	-0.122034526	-0.313048314	-0.397044647
Taf7_extended (15)	1.503341272	2.658791474	-0.039951215	-0.500674286	-0.531435213	-0.172474092	-0.076873915	-0.881946864	-0.488820427	0.224810721	-0.471589311	-0.788574061	-0.434604083
Zfp964_extended (13)	0.893752508	3.113237861	-0.283730715	-0.311551905	-0.397091675	-0.463650668	-0.391089327	-0.431724772	-0.314780786	-0.390093326	-0.228271748	-0.400083353	-0.394922094
Smad3 (68)	0.549543139	3.069910583	-0.429774775	0.004793377	-0.56073417	-0.596237384	-0.549653032	0.288044194	-0.360138709	0.166040019	-0.360489058	-0.589453221	-0.631850963
Bcl3_extended (23)	0.318324077	3.20530379	-0.068342915	0.092880971	-0.354616999	-0.710024529	-0.563735602	-0.198017757	-0.375140421	-0.258011617	-0.255996617	-0.466502066	-0.366120316
Meis1 (18)	-0.238106546	-0.2866246	-0.467213652	-0.210477563	-0.232193383	3.169482443	0.690375491	-0.359837195	-0.349757892	-0.273558083	-0.521285097	-0.453857056	-0.466946866
Usf2 (23)	0.847697564	1.256943997	-0.764275418	-0.458454469	-0.005130654	2.367333116	0.714235229	-1.007008397	-0.693154494	-0.689251404	-0.484353776	-0.556875139	-0.527706155
Rxrb_extended (12)	0.749280319	1.793548742	-0.47352516	-0.768273503	0.951735926	1.582877412	0.584779715	-0.898057974	-1.01590918	-0.810530925	-0.304957763	-0.916942062	-0.474025549
E2f6_extended (24)	-0.650600975	-0.822003385	-0.854925845	0.296076355	-0.724346688	2.630198023	1.240431722	0.115430971	-0.099506831	0.461057099	-0.554547057	-0.418884265	-0.618379124
Zfp426 (13)	0.507198284	-0.313117247	-0.538839803	-0.475663091	-0.996142194	2.802747626	1.185315276	-0.287402714	-0.265937577	-0.412359566	-0.610186289	-0.263383477	-0.332229227
Kdm5a (14)	-1.169180862	-0.801185088	-1.546832568	0.420831444	-1.295203644	0.708529816	0.984363622	1.1793674	1.049052584	0.685487884	0.85250509	-0.448186293	-0.619549385
Grhl2_extended (40)	0.186506365	0.755366329	-0.669756447	0.035512335	-0.505068726	2.514747697	1.361416301	-0.648419761	-0.56214994	-0.207749175	-0.890226864	-0.71228427	-0.657893843
Rxra (34)	-0.277774611	-0.71692291	-0.289225976	0.026655305	-0.54023247	2.976607335	1.115351516	-0.516340108	-0.381481583	-0.407186254	-0.452161364	-0.298002263	-0.239286616
Rreb1_extended (512)	0.14667924	-0.609092024	-0.020877353	0.967385475	-0.807465406	2.48804679	1.124947022	-0.636810468	-0.741247953	-0.055352958	-1.137176719	-0.523257704	-0.195777942
Klf7_extended (506)	0.245274197	-0.337848277	-0.011332425	-0.446004714	-0.254443892	2.772593002	1.320520978	-0.85484162	-0.55117236	-0.766132655	-0.606118552	-0.331650926	-0.178842757
Rad21_extended (598)	0.016216581	-0.921084792	0.013587688	-0.620950006	-0.931001198	2.537372737	1.481518509	-0.460795043	-0.237669707	-0.493076757	-0.807963418	0.137476199	0.286369208
Ezr (101)	0.181929937	-1.062657721	0.357559303	-0.026576416	-1.209556103	2.344604699	1.363850072	-0.209552638	-0.471929432	-0.200543672	-1.232682601	-0.07336834	0.238922914
Prdm1_extended (14)	-0.182920558	-0.432038765	1.309512063	-0.076052459	0.008081085	0.614878395	-0.161508386	-1.530828517	-0.81671641	-0.487173247	2.431290084	-0.703801166	0.02727788
Gata3 (12)	-0.041524365	-0.595616549	0.627148915	-1.086496881	0.015173103	1.782618399	0.895862912	-0.779383049	-0.530052027	-0.882678688	1.889686385	-0.568016548	-0.726721608
Zfx (62)	-0.720627523	-0.591582127	-1.540564069	-0.25775389	-1.234531297	0.481114651	0.52844375	1.806022893	1.158008737	1.056561662	0.32934314	-0.110905133	-0.903530792
Gmeb1 (35)	-0.650130262	-0.804487149	-0.877536471	-0.815410438	-0.93179423	-1.475005829	-0.102833876	1.404735923	1.208795579	0.903550553	1.322884598	0.63870097	0.178530631
Hif1a (15)	-0.834274982	-1.837660716	0.377269262	-0.583453922	-1.440383004	1.483624522	1.155158746	-0.489950517	0.134384098	-0.031687724	0.377453899	0.793890335	0.895630003
Atf2_extended (13)	-0.959687152	-1.236752618	-1.096395883	-0.536297773	-1.417440911	0.375933144	0.667845773	1.345461393	1.391707207	0.854192436	0.921882994	0.055066457	-0.365515066
Gabpb1 (12)	-0.492072717	-1.240413698	-0.623149958	-0.882802277	-2.076983456	0.936464514	1.202702521	0.76947533	0.944729485	0.806909435	-0.057669131	0.459311475	0.253498477
Mafg_extended (62)	-0.456791726	-0.061339453	-1.304934106	0.114778483	-2.172700736	-1.180450618	0.496356689	0.764105362	1.107335969	0.570488067	0.602071718	0.928245124	0.592835226
Ctcf (10)	-0.25095896	-1.297973763	-0.534164208	-0.926683531	-1.397287921	-1.169038249	-0.083645517	0.83808502	1.415946189	0.919870406	1.159491363	0.711466147	0.614893024
Hsf1_extended (13)	-0.47701736	-1.272468929	-1.168282274	-1.084168208	-1.157907675	0.151522119	1.248567861	1.380057929	1.370658649	0.67874739	0.403572756	0.338074161	-0.411356419
Fiz1 (10)	-0.898854573	-1.133194848	-0.971526917	0.836158809	-0.966541394	-1.091859826	0.09915281	1.816591249	1.00247172	1.287452165	-0.169362816	0.339281348	-0.149767729
Tbp (20)	-0.683008917	-0.29538301	-1.087584271	-1.849450175	-1.268185212	-0.132182558	0.702783333	1.498543035	1.118561786	0.179446799	0.47694443	0.8563493	0.483165461
Mios_extended (15)	-0.976656778	-1.358843862	-0.865143012	-0.373446521	-0.969655699	-0.866010661	-0.066793923	1.46961558	1.588850216	0.846064966	0.81201502	0.746655621	0.013349055
Zfp110 (11)	-0.704295876	0.092008717	-0.854280168	-0.778598551	-1.339171865	-1.209037838	-0.031735054	1.933933362	1.570736462	0.505483246	0.327027524	0.571471552	-0.083541511
Zfp687 (24)	-0.64483542	-0.889350109	-1.048894155	-0.708525315	-1.290254667	-1.255921069	0.362687825	1.12035527	1.554723559	0.907843693	0.694790483	0.844946644	0.35243326
Clock_extended (17)	-0.588694867	-1.397194396	0.292671689	-0.241089221	-0.93862282	-1.985974259	-0.040224146	1.051232734	1.046974265	0.072378186	0.74488115	0.960270106	1.02339158
Deaf1 (13)	-0.567395953	-1.573785173	-0.399526806	-0.194052253	-1.088422217	-1.225927678	-0.130723988	1.747732666	1.031286378	1.164640808	-0.017137425	0.766541056	0.486770583
Nfyb (13)	-0.689470792	-0.925444688	-1.028234718	-0.62241818	-1.56502375	-0.593502858	0.14983895	1.494640265	1.409935276	1.104844188	0.246521117	0.943732778	0.074582411
Zfp704 (49)	-0.346717472	1.305078944	-1.216548285	0.473962485	-0.500014355	-1.051225443	-0.761997476	1.822149742	0.192017065	1.523371803	-0.410812341	-0.231811899	-0.797452767
Grhl1_extended (26)	-0.735263267	-0.739025111	-0.809698387	0.182426158	-0.647379968	-0.663749734	-0.420235024	2.270219782	0.684542756	1.791910695	-0.147733554	-0.242610858	-0.52340349
Nfatc2_extended (21)	-0.661768085	-0.650514228	-0.664846195	-0.336978084	-1.144277902	-0.51653154	0.144897705	2.321644826	1.279195439	1.224583503	-0.176177087	-0.193326033	-0.625902318
Klf6 (52)	-0.221080824	-1.494592389	0.750640512	2.792186372	-0.463472617	0.220189196	0.299751204	-0.617778562	-0.235413838	-0.026080718	-0.46626121	-0.588802369	0.050715243
Atf4 (13)	-1.016161037	-1.450314875	-0.321337572	1.394578069	-0.522896399	-1.858355345	-0.142720551	0.658531029	1.124603792	0.757847894	0.127643065	0.632097752	0.616484177
Zfp148_extended (19)	0.244303689	0.536915564	1.769722476	-1.289627135	-0.076976738	0.935849577	0.228222725	1.305453266	-0.756442782	-0.485458291	-1.785699941	-0.427686624	-0.198575786
Mef2d (13)	0.055614512	-0.342984303	0.020357187	-0.620170257	1.272100486	2.518092271	0.830496005	-0.455983781	-0.690627264	-0.185914317	-0.776178752	-1.131458918	-0.493342871
Arid3a_extended (15)	0.555652337	1.478466446	0.735129366	-1.297318743	0.862391895	-1.460643995	-0.874995053	-0.909067283	-0.163100738	-0.764109883	1.448780369	0.312087364	0.076727918
Chd2_extended (12)	1.532844902	1.745369144	0.324010214	-1.230413073	-1.571893775	-1.020854063	-0.388502151	0.432936683	-0.050888274	0.38118585	-0.832105095	0.161011872	0.517297767
Max (16)	-1.092692241	-0.600294826	-1.416900205	0.149232505	1.650863973	-1.423094135	0.569758	-0.311906413	1.045221062	0.328222958	1.411869596	-0.183465367	-0.126814907
Nfyc (31)	-0.325123745	-1.381405494	-1.059020642	-1.397328811	-1.184199218	0.536490188	0.610890648	1.63645415	1.096009692	0.752950685	0.162315898	0.610490263	-0.058523615
Pknox1 (15)	-0.340056177	-1.454594542	-0.700246156	0.831497195	2.101830968	0.934606775	-0.147300762	-0.505981241	0.508633754	-0.204554721	0.914833324	-0.944860496	-0.99380792
Irf7 (14)	0.032045653	-0.565167356	-0.505373659	-0.166296192	2.836196379	-0.016688434	-0.241430119	-0.863891958	-0.493499391	-0.716310903	1.274930749	-0.271592609	-0.302922159
Elf1_extended (1380)	0.811128277	1.335426375	0.799083377	0.312103012	1.720533289	0.414414296	-0.349378476	-1.395138887	-1.226958967	-0.960354357	-0.079418895	-1.03285244	-0.348586603
Zxdb (11)	0.587376916	-0.173037083	1.254025822	1.81076937	1.477367257	-0.725420493	-0.874868144	-0.982371882	-1.200003126	-0.0574446	-0.250455829	-0.909058574	0.043120365
Tef (13)	-0.066313543	1.229978136	-0.248836639	2.682925594	0.749843953	-0.557647871	-0.578453642	-0.830474803	-0.637611395	-0.466489272	-0.102766196	-0.611286214	-0.562868109
Zfhx3 (394)	-0.299389889	-0.689994062	0.725674025	2.29384993	1.554616414	-0.111721659	-0.529998693	-0.567039516	-0.939348043	0.532380226	-0.479303231	-0.978316357	-0.511409143
Ep300_extended (296)	0.293590004	0.153031642	0.913810046	0.763460863	2.477172834	0.1707115	-0.368840517	-1.104786364	-1.225166132	-0.488631058	-0.225155095	-1.023215385	-0.335982338
Creb5_extended (13)	-0.20240717	0.570558828	2.654426949	0.87220729	0.549497486	-0.74405141	-0.753753309	-0.360282641	-0.710263161	-0.311309778	0.224327957	-0.997855591	-0.79109545
Tead4 (76)	0.808316588	1.976312336	1.036220542	0.493579433	1.270015743	-0.966287998	-0.867912351	-0.800651782	-0.932338082	-0.732738019	-0.559838311	-0.678815874	-0.045862225
Creb3 (15)	-0.33015249	0.152506569	-0.834148158	-0.560792154	2.533327024	1.425846271	0.282531061	-0.927499948	-0.379318799	-0.820449366	0.390006451	-0.288046871	-0.643809592
Zfp3 (12)	0.028565047	-0.264931659	-0.257670738	-0.549363149	2.498108953	1.385573736	0.892916774	-0.874832575	-0.682789132	-0.890307116	-0.461513304	-0.527368462	-0.296388375
Klf11_extended (143)	0.029598062	-0.235978721	-0.371973958	0.011465634	0.659241957	2.67500221	1.211092604	-0.903869783	-0.701875102	-0.706408181	-0.638223209	-0.556129059	-0.471942454
Kdm5b_extended (490)	-0.074710036	0.126654605	-0.613998019	0.376377266	1.760499843	2.109790874	0.550817445	-0.849363219	-0.826286713	-0.564652396	-0.059671575	-1.023347872	-0.912110203
Phf8_extended (1652)	-0.134328084	-0.099944165	-0.61437561	1.20381737	1.575341421	1.876633038	0.576755316	-0.954984853	-0.944342825	-0.298648602	-0.272912413	-1.033894738	-0.879115854
Stat1 (142)	0.038541188	-0.132591896	-0.486401725	-0.059936603	2.729771074	1.120582469	0.298115093	-0.827308566	-0.811275662	-0.649205645	0.264912846	-0.803261594	-0.681940977
Stat2 (192)	0.398316466	0.906764054	-0.409370882	0.32402244	2.268565942	0.929370608	0.171731307	-1.107910077	-1.024833285	-0.723820796	0.179709855	-1.10469705	-0.807848582
Pax2 (210)	-0.318052586	0.15558167	-0.394619498	0.474296912	3.030298865	-0.292671347	-0.269515096	-0.636627551	-0.574568058	-0.408003272	0.583317117	-0.662274017	-0.687163138
Atf3 (145)	-0.413691439	0.031613686	-0.454073129	0.796195082	2.916317435	-0.412604517	-0.441541069	-0.476086007	-0.519171221	-0.277335527	0.701259815	-0.714608697	-0.736274412
Tead1 (13)	-0.036401038	1.070026792	-0.2213833	1.374017248	2.178892935	-0.453322619	-0.522003235	-0.903527782	-0.785854481	-0.490784736	0.60627541	-0.912489918	-0.903445277
Pknox2_extended (26)	0.210443963	0.001704856	0.037003154	1.174886808	2.450659453	0.417824689	-0.276435884	-0.959232363	-1.046235031	-0.135349464	0.21656382	-1.203107316	-0.888726684
Foxo1 (229)	0.003881083	0.635989478	0.123654053	0.885818599	2.371029139	0.685698527	-0.109396671	-0.803496057	-1.149048022	-0.187957628	-0.180588235	-1.323006609	-0.952577655
Rarb (129)	-0.293037864	-0.076838819	-0.238582959	0.918658877	2.900500971	0.030234766	-0.454180393	-0.566094172	-0.738205732	-0.27407301	0.394969033	-0.8535174	-0.749833298
Klf5_extended (492)	-0.300398491	0.031163973	-0.524350947	0.78532063	2.870090928	-0.171804071	-0.374408555	-0.634728744	-0.642709911	-0.217568593	0.733616609	-0.795906028	-0.758316801
Cebpb (18)	-0.28793221	0.488709842	-0.363482107	2.868218309	1.117355722	-0.70121734	-0.448914555	-0.643167629	-0.461925636	-0.20256093	-0.237596721	-0.657584115	-0.469902631
Brf1_extended (807)	0.181301924	1.33089848	-0.443008896	0.85201954	2.351934443	0.143792275	-0.329912234	-0.815033748	-0.90060426	-0.473071577	0.051688317	-1.043689787	-0.906314478
Foxo3 (265)	-0.284112522	-0.003771576	-0.363825341	0.52788339	2.956770518	-0.124459365	-0.417760195	-0.577912166	-0.678209057	-0.162738273	0.708531797	-0.837377859	-0.743019352
Foxn3 (207)	-0.311432101	-0.176379856	-0.527963832	0.951607859	2.820482516	0.493360997	-0.150735573	-0.486999481	-0.741063059	-0.026559932	-0.012466669	-0.941482746	-0.890368124
Jund_extended (68)	-0.529662553	-0.344761681	-0.466125793	1.203627681	2.754339357	0.150746219	-0.193293299	-0.523968121	-0.637306981	-0.080954574	0.375619228	-0.872979655	-0.835279828
Sp4 (108)	-0.541513792	-0.168524591	-0.737172434	0.18292905	2.931479615	0.222836487	-0.173785225	-0.478967781	-0.46087257	-0.286900318	0.938662862	-0.67538263	-0.752788672
Wrnip1_extended (252)	-0.555616364	-0.467096244	-0.791922874	1.886722623	2.369986528	-0.130911037	-0.298596715	-0.326542054	-0.504944327	0.209886427	0.119542081	-0.720937585	-0.78957046
Mxi1 (456)	-0.344281048	-0.155276027	-0.661460367	2.103106602	1.963203095	0.533969768	-0.109178258	-0.62277098	-0.784312569	0.10107679	-0.118528339	-0.989851804	-0.915696862
Esrra_extended (723)	-0.578668384	-0.600290564	-0.874119779	1.275481175	2.470016046	0.835024524	0.132266378	-0.455686979	-0.574369044	-0.129804618	0.225853855	-0.819941349	-0.905761262
Zmiz1 (942)	-0.371393547	-0.158089844	-1.080157184	1.290033058	1.767566255	1.536337049	0.487274626	-0.566362706	-0.747152135	0.06937329	-0.037973301	-1.063298766	-1.126156796
Tead2 (619)	-1.033367003	-1.381765966	-1.517632874	0.119497967	1.076492435	1.642067742	0.804660019	0.613408715	0.129345821	0.642345753	0.373056319	-0.433859213	-1.034249716
1810024B03Rik_extended (69)	-1.290997567	-1.544436064	-1.443557346	0.718475577	0.772654001	-0.350609585	0.094859279	1.386790265	0.823793759	1.014906217	0.613449255	-0.013862625	-0.781465167
Tead3 (24)	-0.767652193	-0.982372865	-0.832409101	1.031585647	1.946266539	0.047756309	-0.282885713	-0.447458105	-0.456245648	0.192700637	1.868269148	-0.573912011	-0.743642645
Zfp961 (98)	-0.55376342	-0.494591757	-0.718117726	0.645292981	2.713095792	-0.702866481	-0.499683984	-0.160193963	-0.320991025	0.219161499	1.173270661	-0.569854026	-0.73075855
E2f4_extended (333)	-0.804965362	-0.893847201	-1.075163125	1.144380086	2.519466444	-0.494578857	-0.326075946	0.100268537	-0.106005166	0.278483002	0.776671662	-0.384520204	-0.73411387
Myef2_extended (390)	-0.79994708	-0.539436234	-1.062313265	1.123411208	2.33372003	-0.427734875	-0.467567258	0.534485628	-0.171595473	0.867056867	0.387888259	-0.761007346	-1.01696046
Zbtb16 (201)	-0.737438478	-0.752748228	-0.761759519	0.852638316	2.590450126	-0.500884769	-0.525475467	0.015059481	-0.22913047	0.397374453	1.060110963	-0.606976551	-0.801219857
Etv3_extended (19)	-0.736185972	-0.562925297	-0.383335342	1.114289016	1.581692538	-1.080792178	-0.831029383	-0.381329063	-0.198823113	-0.077393171	2.230186019	-0.332282207	-0.342071847
Nr3c1_extended (14)	-0.246099436	0.148880503	-0.466530737	1.226707081	2.674058626	-0.97095017	-0.52454538	-0.690923412	-0.710532803	0.363486091	0.303981427	-0.60968836	-0.497843431
Pax8_extended (29)	-0.350338152	-0.462877268	-0.316039021	-0.077586861	3.230366881	-0.529361059	-0.417855177	-0.315630962	-0.315296181	-0.187298581	0.436441953	-0.37207568	-0.322449892
Zbtb7c (50)	-0.060859626	-0.346500119	-0.365973791	0.481952841	2.961947322	-0.47554804	-0.485678005	-0.60734248	-0.634178705	-0.285116086	0.904263073	-0.627385071	-0.459581311
Nr1d2_extended (14)	-0.683820529	-0.767967285	-0.11384943	1.212642865	2.685873332	-0.718177262	-0.531576345	-0.21057438	-0.42178098	0.367741223	0.486341788	-0.680358571	-0.624494426
Tcf7l2 (41)	-0.647685346	-0.752904885	-0.53175121	2.309617427	-0.165364196	-0.23824139	-0.133879466	0.620597891	-0.220138409	1.844091873	-0.607114452	-0.722009207	-0.755218629
Gata2_extended (15)	-0.638243231	-0.467203498	-0.262615159	1.432299522	-0.557149048	-0.3585707	-0.444958745	1.008731558	-0.185397513	2.487798849	-0.548139911	-0.728699034	-0.73785309
Nfix (25)	-0.549247352	-0.72823197	-0.068836149	2.508392394	-0.292517767	0.02036691	-0.170054931	0.176154661	-0.4440035	1.717822013	-0.750304466	-0.767860702	-0.65167914
Gcm1 (12)	-0.569991591	-0.583478448	-0.136798583	2.867641492	-0.234103921	-0.212308998	-0.509628561	0.056647562	-0.413599365	1.312467749	-0.538343315	-0.57873345	-0.45977057
Tbx2 (18)	-0.49403694	-0.519249803	-0.426650508	3.0106986	0.626575691	0.027726192	-0.393793504	-0.283795359	-0.553958651	0.633171558	-0.446099036	-0.6507772	-0.529811039
Trp63 (62)	-0.217178106	-0.146580704	-0.151817546	3.156923184	0.083664095	-0.403794024	-0.480456317	-0.451369438	-0.54697374	0.566485178	-0.308591595	-0.641961361	-0.458349627
Gata1 (67)	-0.483393421	-0.497505895	-0.287248861	3.13107033	0.393935254	-0.5409052	-0.445972608	-0.263614138	-0.382938385	0.517935534	-0.168534389	-0.491786658	-0.481041564
Irf3_extended (21)	-0.693047308	-0.812155295	-0.773776338	2.256648201	1.814290461	-0.638809718	-0.322478005	-0.38919767	-0.053827165	0.67527185	0.142087572	-0.668096386	-0.536910199
Hes7_extended (19)	-0.362916468	-0.152457785	-0.325628668	3.311347637	-0.208306039	-0.426169107	-0.339682157	-0.236421003	-0.255949761	-0.03847531	-0.326077798	-0.31441676	-0.32484678
Tbx15_extended (14)	-0.92159734	-1.309652496	-1.098656444	-0.444497865	-0.522042639	0.170747242	0.122240035	2.241869186	1.215993202	0.011015163	0.175752783	0.92580996	-0.566980788
Zfp97_extended (20)	-1.083464334	-1.397250537	-1.165680118	-0.757646483	-0.967757365	0.10699979	0.345771982	0.964114972	1.377611439	0.645125938	0.84331753	1.358642395	-0.26978521
Gm14326_extended (48)	-0.929829264	-1.188531464	-1.051400912	-1.060966539	-0.374550427	-0.831139699	-0.006597935	1.569797784	1.286289552	0.767815708	0.563633724	1.278296301	-0.02281683
Zbtb7a_extended (379)	-0.946884509	-1.09680025	-1.098997423	1.691296693	-0.891317051	-0.055696207	0.097860455	1.430793269	0.54055356	1.455146342	-0.361814722	-0.112486244	-0.651653913
Rbbp5 (240)	-0.900406339	-1.020655566	-1.59147639	-0.958062179	-0.639103679	-0.550844001	0.401940224	1.418352341	1.198043154	0.907379652	0.662604217	1.055326109	0.016902457
Gm14391_extended (93)	-0.801206541	-1.059468588	-1.048599996	-0.824486842	-0.831787848	-0.890088056	-0.090237735	1.723720116	1.339131385	0.832377034	0.470791863	1.132594031	0.047261176
Tfdp1 (1335)	-0.86231467	-1.626905217	-1.091672696	-0.632551533	-1.005236676	-0.406967155	0.305783891	1.42916731	1.139745774	0.871108567	0.463095426	1.171883002	0.244863978
Bdp1_extended (722)	-1.158696658	-1.775219421	-1.418757561	-0.618459022	-0.227877066	0.151730653	0.524548838	1.350376588	1.010402597	0.810838471	0.834752597	0.721071326	-0.204711341
Polr3g_extended (388)	-0.988727775	-1.365409351	-1.199447965	-0.63445071	-0.430693896	-0.699881353	0.035142925	1.758084792	1.178875478	1.078047821	0.484835517	0.868996498	-0.085371982
Zfp937_extended (13)	-0.377728481	-1.106040583	-1.120818584	-1.260365506	-1.38006388	1.356666524	0.631328373	0.599818432	0.851900053	0.127191753	-0.421919494	1.333536817	0.766494578
Gtf2f1_extended (49)	-0.546045317	-0.772377158	-1.36018106	-0.850571409	-1.528301655	1.79334887	1.443969969	0.47212124	0.495888337	0.052600431	0.041714158	0.638129015	0.119704578
Rest_extended (196)	0.247245147	0.412970495	-0.763824616	-1.222660623	-2.119249214	1.586456297	1.248323971	0.642444249	0.40287408	-0.008578672	-0.69037982	0.268087361	-0.003708655
Zfp384 (634)	0.005895048	0.166704209	-1.240660943	-1.004571149	-1.619188257	2.078114364	1.300686524	0.533554459	0.273549991	0.157519217	-0.56458227	0.162396042	-0.249417234
Myc (35)	-0.824204581	-1.074302322	-0.919093348	-0.670517291	-1.095037124	-1.063243554	-0.163168796	0.998467578	1.282273705	0.993809482	0.754912821	1.4954111	0.28469233
Pou2f3 (22)	-0.566246374	-1.018394845	-0.416182309	-0.861663367	-0.8607717	-0.816367242	-0.098513547	0.193785864	1.168840615	-0.340966249	0.431952817	2.467560444	0.716965893
Smc3_extended (26)	-0.148114684	-0.9554546	-1.038100904	-1.178705755	-1.51230048	-0.636897113	0.442032052	1.605344096	1.227747666	0.755293364	0.337321767	0.959767525	0.142067066
Smarca4 (636)	-0.582591396	-1.287234109	-0.91071698	-0.779504925	-1.751658499	0.573950729	0.723398067	1.49325168	0.954355182	0.842992109	-0.274738228	0.831168268	0.167328101
Yy1 (792)	-0.499999231	-1.130474031	-0.724512158	-0.924013712	-2.024043513	1.022768173	0.950885727	1.079723409	0.796989696	0.667912912	-0.271515255	0.817651071	0.238626913
Sp1 (707)	-0.400989479	-1.194129033	-0.375855027	-1.105978724	-2.114703067	0.55264133	0.723362902	1.007242959	0.8920707	0.407146789	-0.171098386	1.171290175	0.60899886
Sp2 (229)	-0.283491769	-1.403433764	-0.064414666	-1.262624811	-1.748818425	1.239776745	1.032677769	0.451874574	0.527814652	-0.053920183	-0.422135997	1.155265225	0.831430651
E2f7 (1493)	-0.391870499	-1.416742446	-0.50278544	-1.246354226	-1.829091102	0.777067505	0.970705681	0.717655543	0.812706355	0.182912204	0.048181349	1.22810843	0.649506644
Maz_extended (444)	-0.005421972	-1.268293661	0.288041011	-0.642828613	-2.274211397	0.513118478	0.536782028	0.706741331	0.45852471	0.236849385	-0.857206071	1.216810292	1.091094479
Srf (67)	-0.367300525	-1.448568524	-0.300310482	-0.974135682	-1.681804884	-0.405056571	0.360810008	1.090663133	0.871006262	0.541194331	-0.212920755	1.515261071	1.01116262
Nfya (365)	-0.363758587	-1.205894414	0.116960667	-1.152423557	-1.839614911	-0.625384979	0.119755993	0.937133662	0.932656017	0.336852524	0.168350162	1.482582122	1.092785302
Zfp597_extended (170)	-0.323429953	-1.366190448	-0.314370406	-1.084831482	-1.897566443	-0.207486283	0.401038094	1.096968987	1.038110203	0.515186886	-0.01598467	1.269304552	0.889250963
Srebf1_extended (634)	-0.16294083	-0.695517562	-0.296395964	-0.594634622	-2.257665673	-0.410888693	0.092905689	1.726670317	0.875452594	1.022142747	-0.477931003	0.759636204	0.419166796
Elf4 (1584)	-0.533670974	-1.123444533	-0.30962241	-0.983350745	-1.778927329	-0.635293323	0.156879938	1.417925838	1.148783357	0.700712995	0.055713009	1.256654475	0.627639701
Ezh2 (82)	-0.628916023	-1.405550637	-0.635463787	-0.902497232	-1.578076807	-0.154059591	0.516110897	1.331119859	1.179582089	0.262709372	-0.09334306	1.342704789	0.765680131
E2f3 (1933)	-0.464483731	-1.299496617	-0.198256574	-1.124899823	-1.751481029	-0.50472653	0.183478206	1.239904534	1.04489095	0.614811884	0.144852791	1.34852227	0.766883669
Ubtf_extended (62)	-0.646371906	-1.164130742	-0.760631549	-0.817475018	-1.532402983	-0.757954016	0.247609008	1.494467238	1.163965146	0.962571464	0.224679228	1.087507067	0.498167061
Pole3 (50)	-0.698160614	-1.167953662	-1.014383628	-0.832621776	-1.303450869	-0.46115602	0.381610357	1.729321033	1.143476476	1.131857627	0.102930962	0.875424654	0.113105461
Pole4 (69)	-0.723212858	-1.105838225	-1.003188752	0.080129374	-1.271346528	-0.891839862	-0.150994194	1.786955145	0.877192237	1.487468071	0.041969114	0.789178361	0.083528117
Zfp143 (36)	-0.696812262	-1.120193931	-0.943133905	-0.925778449	-1.084849933	-0.783412559	0.083720273	1.754969729	1.137478613	1.1853582	0.457510764	0.848356497	0.086786964
Bclaf1 (164)	-0.64655747	-1.130990226	-0.836836537	-0.609049459	-1.894841821	-0.063726499	0.580054208	1.4973427	1.021027418	1.057024504	-0.166310195	0.878995738	0.313867639
Zfp64_extended (57)	-0.550934261	-1.352127616	-0.580768539	-1.072102636	-1.50008234	-0.6285234	0.325097523	1.44213324	1.134407758	0.676572834	0.391004005	1.159421296	0.555902136
Polr3a (171)	-0.768114285	-0.981666418	-1.121225554	-0.661139372	-1.253806167	-0.354704603	0.261788639	1.961837846	1.163969603	1.172253976	0.119093284	0.609746936	-0.148033887
Setdb1_extended (182)	-0.846674523	-1.12852035	-1.083703029	-0.811796398	-1.179653981	-0.439453483	0.324102069	1.718933568	1.206488857	1.10269396	0.386616876	0.838453817	-0.087487385
Elf3 (200)	-0.818981897	-1.348969642	-1.069756375	-0.864428305	-1.416838697	0.27709053	0.684558319	1.373534726	1.259583585	0.760755632	0.304358897	0.954689884	-0.095596658
Pbx3 (199)	-0.750381936	-1.033953626	-0.901465588	-0.920627483	-1.223617277	-0.848482144	0.129905904	1.504808872	1.447967615	0.728950762	0.586253175	1.097207818	0.183433909
Nr2c2 (333)	-0.465469769	-0.812421967	-0.698693637	-0.913136554	-1.738149553	-0.298108088	0.298116263	1.960675684	1.05584218	1.152683004	-0.038459906	0.556487494	-0.05936515
Gabpa (321)	-0.492198791	-1.076142815	-0.745775897	-1.059051578	-1.764475865	-0.422793562	0.365931565	1.283454477	1.132567287	0.617976537	0.244808577	1.338051303	0.577648762
Zfp369_extended (1012)	-0.798946946	-1.23702175	-1.035300944	-0.731498117	-1.47583225	-0.118653073	0.433680104	1.584769623	1.212216592	0.975512012	0.227117237	0.92667462	0.037282892
Xrcc4_extended (1849)	-0.699649049	-1.097626512	-1.075220941	-1.016601657	-1.650565551	0.47249613	0.773640406	1.418557886	1.101718416	0.744196177	0.111355493	0.881096974	0.036602227
Hcfc1 (492)	-0.518289306	-1.115857981	-0.722719546	-1.13713289	-1.727263547	-0.242236474	0.428127669	1.478551485	1.099564662	0.696493101	0.159151885	1.15945818	0.442152762
E2f5 (518)	-0.618024214	-1.376612951	-0.692366694	-0.939833527	-1.670850069	-0.208755143	0.389962462	1.395648187	1.105398149	0.756130797	0.221836014	1.166297715	0.471169274
Sin3a (1252)	-0.598261135	-1.154886639	-0.778757818	-0.735932129	-1.733392668	-0.365555025	0.284973354	1.582273003	1.126408068	1.007173385	0.040147945	1.032696321	0.293113336
E2f2 (1184)	-0.601936421	-1.335988959	-0.73793135	-0.981116765	-1.692664427	-0.024038415	0.580031897	1.313870286	1.085951619	0.672905716	0.012895874	1.257967975	0.450052968
Brca1 (1769)	-0.677990184	-1.252671899	-0.845392372	-0.867572631	-1.665018247	-0.14399004	0.469773685	1.469994892	1.157120295	0.867598571	0.13577864	1.066465862	0.285903426
Taf1 (2443)	-0.481689034	-1.006587874	-0.744842542	-1.10393425	-1.82345159	-0.260012356	0.423755703	1.393882996	1.134305025	0.732699405	0.055326483	1.177584174	0.502963859
Nrf1 (1412)	-0.676945563	-1.284499619	-0.729060184	-0.994606854	-1.672016066	-0.131012564	0.513130871	1.40550292	1.13124777	0.774933297	0.130052797	1.117969711	0.415303484
Creb1_extended (1235)	-0.553634239	-1.318759674	-0.582383239	-1.033074619	-1.817265627	-0.019766742	0.509098842	1.283060052	1.085980897	0.669716595	0.056507225	1.198280603	0.522239926
Cebpz (395)	-0.712115047	-1.210066642	-0.988471787	-0.899966446	-1.449161563	-0.242615212	0.413346956	1.639841032	1.145277835	0.948743225	0.19846701	0.967322793	0.189397846
Hdac2_extended (313)	-0.692130762	-1.284874869	-0.894637279	-0.755522054	-1.518500363	-0.413242362	0.388787284	1.500558817	1.160148959	0.884827065	0.117938759	1.166633719	0.340013088
E2f1 (916)	-0.73315319	-1.243727948	-0.925951487	-0.72214713	-1.37402965	-0.498457205	0.263295559	1.697425187	1.22413764	0.962837222	0.210683103	0.976381883	0.162706015
