# Supplementary material for: Single nuclei RNA-seq of mouse placental labyrinth development
Source: eLife. 2020 Nov 3;9:e60266. doi: 10.7554/eLife.60266 (PMC7669270; doi:10.7554/eLife.60266)
Supplement: Supplementary file 1. — Contains information of the number of nuclei captured at each timepoint and the processing information for each dataset (number of Principal Components and the resolution parameters used for cluster/integration) [file elife-60266-supp1.xlsx]

## Sheet: Sheet1
Supplementary Table 1 - Sample information and processing
Stage	Target Nuclei Capture	Total Nuclei Capture	Dimensions for Integration	PC (clustering/UMAP)	Resolution (clustering)
E9.5	6000	4124	N/A	30	0.4
E10.5	10000	6937	N/A	30	0.3
E12.5	10000	6780	N/A	30	0.4
E14.5	10000	9485	N/A	20	0.4
All Combined	N/A	27326	30	40	1
Trophoblast Subset	N/A	16836	20	20	0.6
