# Supplementary material for: Single nuclei RNA-seq of mouse placental labyrinth development
Source: eLife. 2020 Nov 3;9:e60266. doi: 10.7554/eLife.60266 (PMC7669270; doi:10.7554/eLife.60266)
Supplement: Supplementary file 2. — Breakdown of the number of nuclei collected at each timepoint for each cluster identified in the dataset used in Figure 1. Also, provided is the percent of the total nuclei assigned to each cluster captured at each timepoint. Finally, these data are normalized to the number of nuclei captured at each timepoint so that comparisons may be made with in a cluster across timepoints. [file elife-60266-supp2.xlsx]

## Sheet: Sheet1
Supplementary Table 2 - Number of nuclei captured per cluster complete dataset
Number of Cells in each cluster from each timepoint								Percent of each cluster captured at each timepoint
Cluster Number	E9.5	E10.5	E12.5	E14.5	Total			Cluster Number	E9.5	E10.5	E12.5	E14.5	Total
0	109	272	537	1971	2889			0	3.77293	9.41502	18.5877	68.2243	100
1	168	596	660	1175	2599			1	6.46402	22.9319	25.3944	45.2097	100
2	390	989	378	488	2245			2	17.3719	44.0535	16.8374	21.7372	100
3	303	582	232	1121	2238			3	13.5389	26.0054	10.3664	50.0894	100
4	10	185	1633	231	2059			4	0.485673	8.98494	79.3103	11.219	100
5	0	86	432	897	1415			5	0	6.07774	30.53	63.3922	100
6	242	330	234	576	1382			6	17.5109	23.8784	16.932	41.6787	100
7	500	429	315	81	1325			7	37.7358	32.3774	23.7736	6.11321	100
8	537	512	130	42	1221			8	43.9803	41.9328	10.647	3.4398	100
9	314	259	274	252	1099			9	28.5714	23.5669	24.9318	22.9299	100
10	173	326	145	397	1041			10	16.6186	31.316	13.9289	38.1364	100
11	32	405	323	272	1032			11	3.10078	39.2442	31.2984	26.3566	100
12	147	175	253	405	980			12	15	17.8571	25.8163	41.3265	100
13	254	467	175	7	903			13	28.1285	51.7165	19.3798	0.775194	100
14	71	93	160	474	798			14	8.89724	11.6541	20.0501	59.3985	100
15	113	27	146	457	743			15	15.2086	3.63392	19.6501	61.5074	100
16	206	208	190	73	677			16	30.4284	30.7238	28.065	10.7829	100
17	25	216	123	117	481			17	5.19751	44.9064	25.5717	24.3243	100
18	205	189	49	2	445			18	46.0674	42.4719	11.0112	0.449438	100
19	42	59	110	220	431			19	9.74478	13.6891	25.522	51.0441	100
20	54	62	26	139	281			20	19.2171	22.0641	9.25267	49.4662	100
21	54	138	60	6	258			21	20.9302	53.4884	23.2558	2.32558	100
22	18	149	28	21	216			22	8.33333	68.9815	12.963	9.72222	100
23	21	26	130	13	190			23	11.0526	13.6842	68.4211	6.84211	100
24	62	56	12	26	156			24	39.7436	35.8974	7.69231	16.6667	100
25	55	47	10	21	133			25	41.3534	35.3383	7.5188	15.7895	100
26	19	54	15	1	89			26	21.3483	60.6742	16.8539	1.1236	100
Total	4124	6937	6780	9485	27326
Number of Cells in each cluster by timepoint (normalized to the number of cells captured at E14.5)								Percent of each cluster captured at each timepoint (normalized to total number of cells captured at E14.5)
Cluster Number	E9.5	E10.5	E12.5	E14.5	Total			Cluster Number	E9.5	E10.5	E12.5	E14.5	Total
0	250.695	371.907	751.246	1971	3344.85			0	7.49495	11.1188	22.4598	58.9265	100
1	386.392	814.914	923.319	1175	3299.62			1	11.7102	24.6972	27.9825	35.6101	100
2	896.981	1352.27	528.81	488	3266.06			2	27.4637	41.4036	16.1911	14.9416	100
3	696.885	795.772	324.56	1121	2938.22			3	23.718	27.0835	11.0462	38.1524	100
4	22.9995	252.952	2284.51	231	2791.47			4	0.823923	9.06161	81.8392	8.27522	100
5	0	117.588	604.354	897	1618.94			5	0	7.26328	37.3302	55.4065	100
6	556.588	451.211	327.358	576	1911.16			6	29.1231	23.6093	17.1288	30.1388	100
7	1149.98	586.574	440.675	81	2258.22			7	50.9239	25.975	19.5142	3.58689	100
8	1235.07	700.061	181.866	42	2159			8	57.2058	32.4252	8.42361	1.94534	100
9	722.185	354.132	383.317	252	1711.63			9	42.1927	20.6897	22.3948	14.7228	100
10	397.892	445.742	202.85	397	1443.48			10	27.5647	30.8796	14.0528	27.5029	100
11	73.5984	553.759	451.867	272	1351.22			11	5.4468	40.982	33.4413	20.1299	100
12	338.093	239.279	353.939	405	1336.31			12	25.3005	17.9059	26.4863	30.3073	100
13	584.188	638.532	244.819	7	1474.54			13	39.6183	43.3038	16.6031	0.474725	100
14	163.297	127.159	223.835	474	988.291			14	16.5231	12.8666	22.6487	47.9616	100
15	259.895	36.9173	204.249	457	958.061			15	27.1271	3.85333	21.319	47.7005	100
16	473.79	284.4	265.804	73	1096.99			16	43.1899	25.9254	24.2302	6.65455	100
17	57.4988	295.338	172.073	117	641.91			17	8.95746	46.0093	26.8064	18.2269	100
18	471.49	258.421	68.5494	2	800.46			18	58.9024	32.284	8.56375	0.249856	100
19	96.598	80.671	153.886	220	551.155			19	17.5264	14.6367	27.9207	39.9161	100
20	124.197	84.773	36.3732	139	384.343			20	32.3142	22.0566	9.46371	36.1656	100
21	124.197	188.688	83.9381	6	402.824			21	30.8317	46.8414	20.8374	1.48949	100
22	41.3991	203.729	39.1711	21	305.299			22	13.5602	66.7309	12.8304	6.87851	100
23	48.299	35.5499	181.866	13	278.715			23	17.3292	12.755	65.2516	4.66427	100
24	142.597	76.5691	16.7876	26	261.954			24	54.4359	29.23	6.40862	9.92542	100
25	126.497	64.2634	13.9897	21	225.75			25	56.0342	28.4666	6.19697	9.30231	100
26	43.6991	73.8345	20.9845	1	139.518			26	31.3214	52.9211	15.0407	0.716753	100
Total	9485	9485	9485	9485	37940
