# Supplementary material for: Single nuclei RNA-seq of mouse placental labyrinth development
Source: eLife. 2020 Nov 3;9:e60266. doi: 10.7554/eLife.60266 (PMC7669270; doi:10.7554/eLife.60266)
Supplement: Supplementary file 3. — Breakdown of the number of nuclei collected at each timepoint for each cluster identified in the trophoblast dataset used in Figures 2–6. Also, provided is the percent of the total nuclei assigned to each cluster captured at each timepoint. Finally, these data are normalized to the number of nuclei captured at each timepoint so that comparisons may be made with in a cluster across timepoints. [file elife-60266-supp3.xlsx]

## Sheet: Sheet1
Supplementary Table 3 - Number of nuclei captured per cluster trophoblast dataset
Number of Cells in each cluster from each timepoint									Percent of each cluster captured at each timepoint
Cluster Number	Annotation	E9.5	E10.5	E12.5	E14.5	Total			Cluster Number	Annotation	E9.5	E10.5	E12.5	E14.5	Total
0	SynTI	108	279	556	1963	2906			0	SynTI	3.71645	9.60083	19.1328	67.5499	100
1	GC	134	474	635	1130	2373			1	GC	5.64686	19.9747	26.7594	47.619	100
2	JZP 2	320	915	355	462	2052			2	JZP 2	15.5945	44.5906	17.3002	22.5146	100
3	JZP 1	502	567	326	162	1557			3	JZP 1	32.2415	36.4162	20.9377	10.4046	100
4	SpT	0	73	424	848	1345			4	SpT	0	5.42751	31.5242	63.0483	100
5	SpT Precursor	42	430	341	337	1150			5	SpT Precursor	3.65217	37.3913	29.6522	29.3043	100
6	LaTP2	476	389	236	26	1127			6	LaTP2	42.236	34.5164	20.9406	2.30701	100
7	S-TGC Precursor	272	213	256	213	954			7	S-TGC Precursor	28.5115	22.327	26.8344	22.327	100
8	S-TGC	150	159	229	391	929			8	S-TGC	16.1464	17.1152	24.6502	42.0883	100
9	SynTII	77	102	170	473	822			9	SynTII	9.3674	12.4088	20.6813	57.5426	100
10	LaTP	364	350	57	15	786			10	LaTP	46.3104	44.5293	7.25191	1.9084	100
11	SynTI Precursor	197	214	187	78	676			11	SynTI Precursor	29.142	31.6568	27.6627	11.5385	100
12	SynTII Precursor	51	64	28	16	159			12	SynTII Precursor	32.0755	40.2516	17.6101	10.0629	100
Total		2693	4229	3800	6114	16836
Number of Cells in each cluster by timepoint (normalized to total number of cells captured at E14.5)									Percent of each cluster captured at each timepoint (normalized to total number of cells captured at E14.5)
Cluster Number	Annotation	E9.5	E10.5	E12.5	E14.5	Total			Cluster Number	Annotation	E9.5	E10.5	E12.5	E14.5	Total
0	SynTI	245.196	403.359	894.575	1963	3506.13			0	SynTI	6.99334	11.5044	25.5146	55.9877	100
1	GC	304.224	685.277	1021.68	1130	3141.18			1	GC	9.68502	21.8159	32.5254	35.9737	100
2	JZP 2	726.506	1322.84	571.176	462	3082.53			2	JZP 2	23.5685	42.9143	18.5295	14.9877	100
3	JZP 1	1139.71	819.73	524.517	162	2645.95			3	JZP 1	43.0736	30.9805	19.8234	6.12256	100
4	SpT	0	105.538	682.194	848	1635.73			4	SpT	0	6.45206	41.7057	51.8422	100
5	SpT Precursor	95.3539	621.665	548.651	337	1602.67			5	SpT Precursor	5.94969	38.7893	34.2336	21.0274	100
6	LaTP2	1080.68	562.39	379.712	26	2048.78			6	LaTP2	52.7474	27.45	18.5336	1.26905	100
7	S-TGC Precursor	617.53	307.941	411.891	213	1550.36			7	S-TGC Precursor	39.8314	19.8625	26.5674	13.7387	100
8	S-TGC	340.55	229.871	368.449	391	1329.87			8	S-TGC	25.6077	17.2853	27.7056	29.4014	100
9	SynTII	174.815	147.465	273.521	473	1068.8			9	SynTII	16.3562	13.7972	25.5914	44.2552	100
10	LaTP	826.4	506.006	91.71	15	1439.12			10	LaTP	57.4241	35.1609	6.37266	1.04231	100
11	SynTI Precursor	447.255	309.387	300.873	78	1135.51			11	SynTI Precursor	39.3879	27.2464	26.4966	6.86913	100
12	SynTII Precursor	115.787	92.5268	45.0505	16	269.364			12	SynTII Precursor	42.9852	34.3501	16.7248	5.93991	100
Total		6114	6114	6114	6114	24456
